# Supplementary material for: Illuminating the dark conformational space of macrocycles using dominant rotors
Source: Springer Nature journal article supplement (doi:10.1038/s41557-020-00620-y), 2021-02-15
Supplement: 41557_2020_620_MOESM49_ESM.cif [file 41557_2020_620_MOESM49_ESM.cif]

####################################################################### 
# 
# This file contains crystal structure data downloaded from the 
# Cambridge Structural Database (CSD) hosted by the Cambridge 
# Crystallographic Data Centre (CCDC).
# 
# Full information about CCDC data access policies and citation 
# guidelines are available at http://www.ccdc.cam.ac.uk/access/V1 
# 
# Audit and citation data items may have been added by the CCDC. 
# Please retain this information to preserve the provenance of 
# this file and to allow appropriate attribution of the data. 
# 
#######################################################################

data_d18119_a
_database_code_depnum_ccdc_archive 'CCDC 1956029'
loop_
_audit_author_name
_audit_author_address
'Alan Lough'
;University of Toronto
Canada
;
_audit_update_record             
;
2019-09-26 deposited with the CCDC.	2020-01-17 downloaded from the CCDC.
;

_audit_creation_method           SHELXL-2016/6
_shelx_SHELXL_version_number     2016/6
_chemical_name_systematic        ?
_chemical_name_common            ?
_chemical_melting_point          ?
_chemical_formula_moiety         'C22 H22 N6 O3'
_chemical_formula_sum            'C22 H22 N6 O3'
_chemical_formula_weight         418.45

loop_
_atom_type_symbol
_atom_type_description
_atom_type_scat_dispersion_real
_atom_type_scat_dispersion_imag
_atom_type_scat_source
C C 0.0181 0.0091 'International Tables Vol C Tables 4.2.6.8 and 6.1.1.4'
H H 0.0000 0.0000 'International Tables Vol C Tables 4.2.6.8 and 6.1.1.4'
N N 0.0311 0.0180 'International Tables Vol C Tables 4.2.6.8 and 6.1.1.4'
O O 0.0492 0.0322 'International Tables Vol C Tables 4.2.6.8 and 6.1.1.4'

_space_group_crystal_system      triclinic
_space_group_IT_number           1
_space_group_name_H-M_alt        'P 1'
_space_group_name_Hall           'P 1'

_shelx_space_group_comment       
; 
The symmetry employed for this shelxl refinement is uniquely defined 
by the following loop, which should always be used as a source of 
symmetry information in preference to the above space-group names. 
They are only intended as comments. 
;

loop_
_space_group_symop_operation_xyz
'x, y, z'

_cell_length_a                   9.2698(3)
_cell_length_b                   9.6100(3)
_cell_length_c                   13.8726(5)
_cell_angle_alpha                74.529(1)
_cell_angle_beta                 71.442(1)
_cell_angle_gamma                61.312(1)
_cell_volume                     1018.04(6)
_cell_formula_units_Z            2
_cell_measurement_temperature    150(2)
_cell_measurement_reflns_used    9862
_cell_measurement_theta_min      3.39
_cell_measurement_theta_max      66.93

_exptl_crystal_description       Block
_exptl_crystal_colour            colourless
_exptl_crystal_density_meas      ?
_exptl_crystal_density_method    ?
_exptl_crystal_density_diffrn    1.365
_exptl_crystal_F_000             440
_exptl_transmission_factor_min   ?
_exptl_transmission_factor_max   ?
_exptl_crystal_size_max          0.160
_exptl_crystal_size_mid          0.150
_exptl_crystal_size_min          0.130
_exptl_absorpt_coefficient_mu    0.774
_shelx_estimated_absorpt_T_min   0.886
_shelx_estimated_absorpt_T_max   0.906
_exptl_absorpt_correction_type   multi-scan
_exptl_absorpt_correction_T_min  0.6854
_exptl_absorpt_correction_T_max  0.7529
_exptl_absorpt_process_details   'SADABS (Bruker, 2014)'
_exptl_absorpt_special_details   ?
_diffrn_ambient_temperature      150(2)
_diffrn_radiation_wavelength     1.54178
_diffrn_radiation_type           CuK\a
_diffrn_source                   'Bruker ImuS with multi-layer optics'
_diffrn_measurement_device_type  'Bruker Kappa APEX-DUO CCD'
_diffrn_measurement_method       '\f and \w scans'
_diffrn_detector_area_resol_mean ?
_diffrn_reflns_number            29524
_diffrn_reflns_av_unetI/netI     0.0220
_diffrn_reflns_av_R_equivalents  0.0282
_diffrn_reflns_limit_h_min       -10
_diffrn_reflns_limit_h_max       11
_diffrn_reflns_limit_k_min       -11
_diffrn_reflns_limit_k_max       11
_diffrn_reflns_limit_l_min       -15
_diffrn_reflns_limit_l_max       16
_diffrn_reflns_theta_min         3.392
_diffrn_reflns_theta_max         67.205
_diffrn_reflns_theta_full        67.205
_diffrn_measured_fraction_theta_max 0.984
_diffrn_measured_fraction_theta_full 0.984
_diffrn_reflns_Laue_measured_fraction_max 0.984
_diffrn_reflns_Laue_measured_fraction_full 0.984
_diffrn_reflns_point_group_measured_fraction_max 0.948
_diffrn_reflns_point_group_measured_fraction_full 0.948
_reflns_number_total             6917
_reflns_number_gt                6875
_reflns_threshold_expression     'I > 2\s(I)'
_reflns_Friedel_coverage         0.925
_reflns_Friedel_fraction_max     0.911
_reflns_Friedel_fraction_full    0.911

_reflns_special_details          
; 
 Reflections were merged by SHELXL according to the crystal 
 class for the calculation of statistics and refinement. 
  
 _reflns_Friedel_fraction is defined as the number of unique 
 Friedel pairs measured divided by the number that would be 
 possible theoretically, ignoring centric projections and 
 systematic absences. 
;

_computing_data_collection       'APEX2 (Bruker, 2014)'
_computing_cell_refinement       APEX2
_computing_data_reduction        'SAINT (Bruker, 2014)'
_computing_structure_solution    'SHELXT (Sheldrick, 2015)'
_computing_structure_refinement  'SHELXL-2016/6 (Sheldrick, 2016)'
_computing_molecular_graphics    'PLATON (Spek, 2009)'
_computing_publication_material  'SHELXTL (Sheldrick, 2008)'
_refine_special_details          ?
_refine_ls_structure_factor_coef Fsqd
_refine_ls_matrix_type           full
_refine_ls_weighting_scheme      calc
_refine_ls_weighting_details     
'w=1/[\s^2^(Fo^2^)+(0.0251P)^2^+0.1580P] where P=(Fo^2^+2Fc^2^)/3'
_atom_sites_solution_primary     ?
_atom_sites_solution_secondary   ?
_atom_sites_solution_hydrogens   mixed
_refine_ls_hydrogen_treatment    mixed
_refine_ls_extinction_method     'SHELXL-2016/6 (Sheldrick 2016)'
_refine_ls_extinction_coef       0.0086(4)
_refine_ls_extinction_expression Fc^*^=kFc[1+0.001xFc^2^\l^3^/sin(2\q)]^-1/4^
_refine_ls_abs_structure_details 
; 
 Flack x determined using 3269 quotients [(I+)-(I-)]/[(I+)+(I-)] 
 (Parsons, Flack and Wagner, Acta Cryst. B69 (2013) 249-259). 
;
_refine_ls_abs_structure_Flack   0.10(3)
_chemical_absolute_configuration ad
_refine_ls_number_reflns         6917
_refine_ls_number_parameters     586
_refine_ls_number_restraints     3
_refine_ls_R_factor_all          0.0208
_refine_ls_R_factor_gt           0.0207
_refine_ls_wR_factor_ref         0.0528
_refine_ls_wR_factor_gt          0.0524
_refine_ls_goodness_of_fit_ref   1.051
_refine_ls_restrained_S_all      1.051
_refine_ls_shift/su_max          0.000
_refine_ls_shift/su_mean         0.000

loop_
_atom_site_label
_atom_site_type_symbol
_atom_site_fract_x
_atom_site_fract_y
_atom_site_fract_z
_atom_site_U_iso_or_equiv
_atom_site_adp_type
_atom_site_occupancy
_atom_site_site_symmetry_order
_atom_site_calc_flag
_atom_site_refinement_flags_posn
_atom_site_refinement_flags_adp
_atom_site_refinement_flags_occupancy
_atom_site_disorder_assembly
_atom_site_disorder_group
O1A O 0.70515(15) 0.12460(14) 0.74163(10) 0.0214(3) Uani 1 1 d . . . . .
O2A O 0.24979(15) 0.67351(15) 0.78109(10) 0.0228(3) Uani 1 1 d . . . . .
O3A O 0.24487(15) 0.28548(15) 0.77509(10) 0.0226(3) Uani 1 1 d . . . . .
N1A N 0.89443(19) -0.10687(18) 0.80688(12) 0.0199(3) Uani 1 1 d . . . . .
N2A N 0.50079(18) 0.44944(17) 0.76664(12) 0.0172(3) Uani 1 1 d . . . . .
N3A N 0.40884(18) 0.35713(16) 0.63005(12) 0.0169(3) Uani 1 1 d . . . . .
N4A N 0.48492(18) -0.06203(17) 0.82300(11) 0.0173(3) Uani 1 1 d . . . . .
N5A N 0.39853(19) -0.04419(18) 0.98851(12) 0.0222(3) Uani 1 1 d . . . . .
N6A N 0.57452(18) -0.11276(17) 0.96248(11) 0.0201(3) Uani 1 1 d . . . . .
C1A C 0.8013(2) -0.1917(2) 0.80473(14) 0.0197(4) Uani 1 1 d . . . . .
H1AA H 0.858916 -0.305441 0.833310 0.024 Uiso 1 1 calc R U . . .
H1AB H 0.801989 -0.188036 0.732592 0.024 Uiso 1 1 calc R U . . .
C2A C 0.8407(2) 0.0492(2) 0.76844(13) 0.0177(4) Uani 1 1 d . . . . .
C3A C 0.9552(2) 0.1249(2) 0.75971(15) 0.0222(4) Uani 1 1 d . . . . .
H3AA H 1.057070 0.082021 0.704639 0.027 Uiso 1 1 calc R U . . .
H3AB H 0.992071 0.094220 0.824928 0.027 Uiso 1 1 calc R U . . .
C4A C 0.8707(2) 0.3081(2) 0.73616(15) 0.0207(4) Uani 1 1 d . . . . .
H4AA H 0.959085 0.347316 0.711173 0.025 Uiso 1 1 calc R U . . .
H4AB H 0.811486 0.339010 0.680341 0.025 Uiso 1 1 calc R U . . .
C5A C 0.7453(2) 0.3893(2) 0.82817(14) 0.0181(4) Uani 1 1 d . . . . .
C6A C 0.8102(2) 0.4008(2) 0.90237(15) 0.0217(4) Uani 1 1 d . . . . .
H6AA H 0.928923 0.350738 0.895905 0.026 Uiso 1 1 calc R U . . .
C7A C 0.7064(2) 0.4830(2) 0.98508(15) 0.0234(4) Uani 1 1 d . . . . .
H7AA H 0.753396 0.489005 1.034666 0.028 Uiso 1 1 calc R U . . .
C8A C 0.5334(2) 0.5563(2) 0.99469(14) 0.0219(4) Uani 1 1 d . . . . .
H8AA H 0.461504 0.615786 1.050017 0.026 Uiso 1 1 calc R U . . .
C9A C 0.4644(2) 0.5436(2) 0.92424(14) 0.0196(4) Uani 1 1 d . . . . .
H9AA H 0.345293 0.592038 0.932609 0.024 Uiso 1 1 calc R U . . .
C10A C 0.5685(2) 0.46011(19) 0.84088(13) 0.0170(4) Uani 1 1 d . . . . .
C11A C 0.3540(2) 0.5550(2) 0.73861(14) 0.0167(3) Uani 1 1 d . . . . .
C12A C 0.3334(2) 0.5261(2) 0.64180(14) 0.0179(4) Uani 1 1 d . . . . .
H12A H 0.398730 0.574353 0.583071 0.022 Uiso 1 1 calc R U . . .
C13A C 0.1529(2) 0.6136(2) 0.62848(16) 0.0268(4) Uani 1 1 d . . . . .
H13A H 0.109359 0.727639 0.632421 0.040 Uiso 1 1 calc R U . . .
H13B H 0.082746 0.568862 0.682938 0.040 Uiso 1 1 calc R U . . .
H13C H 0.149929 0.600772 0.561469 0.040 Uiso 1 1 calc R U . . .
C14A C 0.3513(2) 0.2538(2) 0.69407(13) 0.0165(3) Uani 1 1 d . . . . .
C15A C 0.4242(2) 0.0952(2) 0.65580(13) 0.0166(4) Uani 1 1 d . . . . .
C16A C 0.4321(2) 0.0931(2) 0.55389(14) 0.0203(4) Uani 1 1 d . . . . .
H16A H 0.389396 0.191638 0.510579 0.024 Uiso 1 1 calc R U . . .
C17A C 0.5008(2) -0.0494(2) 0.51458(15) 0.0236(4) Uani 1 1 d . . . . .
H17A H 0.505386 -0.047772 0.444922 0.028 Uiso 1 1 calc R U . . .
C18A C 0.5630(2) -0.1943(2) 0.57674(15) 0.0239(4) Uani 1 1 d . . . . .
H18A H 0.611591 -0.292391 0.549905 0.029 Uiso 1 1 calc R U . . .
C19A C 0.5534(2) -0.1945(2) 0.67845(15) 0.0212(4) Uani 1 1 d . . . . .
H19A H 0.594794 -0.293436 0.721643 0.025 Uiso 1 1 calc R U . . .
C20A C 0.4841(2) -0.0520(2) 0.71793(13) 0.0167(3) Uani 1 1 d . . . . .
C21A C 0.3505(2) -0.0162(2) 0.90411(14) 0.0195(4) Uani 1 1 d . . . . .
H21A H 0.235981 0.030423 0.899540 0.023 Uiso 1 1 calc R U . . .
C22A C 0.6226(2) -0.12234(19) 0.86451(14) 0.0168(3) Uani 1 1 d . . . . .
O1B O 0.49161(15) 0.63930(14) 0.23523(10) 0.0212(3) Uani 1 1 d . . . . .
O2B O 0.32781(16) 1.19569(14) 0.29653(10) 0.0233(3) Uani 1 1 d . . . . .
O3B O 0.77022(17) 0.77103(15) 0.28978(10) 0.0242(3) Uani 1 1 d . . . . .
N1B N 0.47238(19) 0.40583(18) 0.28984(12) 0.0208(3) Uani 1 1 d . . . . .
N2B N 0.33886(18) 0.96351(17) 0.27454(12) 0.0173(3) Uani 1 1 d . . . . .
N3B N 0.66119(18) 0.88033(17) 0.14884(12) 0.0168(3) Uani 1 1 d . . . . .
N4B N 0.82816(18) 0.43268(17) 0.31519(12) 0.0175(3) Uani 1 1 d . . . . .
N5B N 0.7401(2) 0.43401(18) 0.48242(12) 0.0233(3) Uani 1 1 d . . . . .
N6B N 0.65453(19) 0.37510(17) 0.45034(12) 0.0214(3) Uani 1 1 d . . . . .
C1B C 0.6520(2) 0.3167(2) 0.28683(15) 0.0203(4) Uani 1 1 d . . . . .
H1BA H 0.715793 0.325510 0.214895 0.024 Uiso 1 1 calc R U . . .
H1BB H 0.678627 0.202168 0.311062 0.024 Uiso 1 1 calc R U . . .
C2B C 0.4067(2) 0.5637(2) 0.25778(14) 0.0184(4) Uani 1 1 d . . . . .
C3B C 0.2247(2) 0.6409(2) 0.24840(15) 0.0223(4) Uani 1 1 d . . . . .
H3BA H 0.156340 0.607111 0.312361 0.027 Uiso 1 1 calc R U . . .
H3BB H 0.218696 0.601673 0.191302 0.027 Uiso 1 1 calc R U . . .
C4B C 0.1479(2) 0.8244(2) 0.22901(14) 0.0200(4) Uani 1 1 d . . . . .
H4BA H 0.230762 0.858099 0.176730 0.024 Uiso 1 1 calc R U . . .
H4BB H 0.046949 0.865175 0.200866 0.024 Uiso 1 1 calc R U . . .
C5B C 0.0977(2) 0.8993(2) 0.32476(14) 0.0173(4) Uani 1 1 d . . . . .
C6B C -0.0489(2) 0.9023(2) 0.39697(15) 0.0205(4) Uani 1 1 d . . . . .
H6BA H -0.108952 0.853432 0.385557 0.025 Uiso 1 1 calc R U . . .
C7B C -0.1085(2) 0.9744(2) 0.48414(15) 0.0223(4) Uani 1 1 d . . . . .
H7BA H -0.208495 0.975286 0.531865 0.027 Uiso 1 1 calc R U . . .
C8B C -0.0212(2) 1.0455(2) 0.50159(15) 0.0222(4) Uani 1 1 d . . . . .
H8BA H -0.062630 1.096907 0.560925 0.027 Uiso 1 1 calc R U . . .
C9B C 0.1254(2) 1.0419(2) 0.43312(14) 0.0203(4) Uani 1 1 d . . . . .
H9BA H 0.185483 1.089393 0.446201 0.024 Uiso 1 1 calc R U . . .
C10B C 0.1865(2) 0.96902(19) 0.34460(13) 0.0162(4) Uani 1 1 d . . . . .
C11B C 0.3998(2) 1.0718(2) 0.25605(14) 0.0166(3) Uani 1 1 d . . . . .
C12B C 0.5693(2) 1.0397(2) 0.17934(14) 0.0177(4) Uani 1 1 d . . . . .
H12B H 0.642027 1.052006 0.213389 0.021 Uiso 1 1 calc R U . . .
C13B C 0.5448(3) 1.1672(2) 0.08515(15) 0.0269(4) Uani 1 1 d . . . . .
H13D H 0.479139 1.273672 0.107079 0.040 Uiso 1 1 calc R U . . .
H13E H 0.484425 1.151803 0.045336 0.040 Uiso 1 1 calc R U . . .
H13F H 0.655219 1.157974 0.042511 0.040 Uiso 1 1 calc R U . . .
C14B C 0.7639(2) 0.7590(2) 0.20518(14) 0.0166(3) Uani 1 1 d . . . . .
C15B C 0.8798(2) 0.6098(2) 0.15576(14) 0.0164(3) Uani 1 1 d . . . . .
C16B C 0.9641(2) 0.6221(2) 0.05305(14) 0.0193(4) Uani 1 1 d . . . . .
H16B H 0.944597 0.725023 0.014790 0.023 Uiso 1 1 calc R U . . .
C17B C 1.0760(2) 0.4867(2) 0.00564(15) 0.0226(4) Uani 1 1 d . . . . .
H17B H 1.131187 0.497629 -0.064616 0.027 Uiso 1 1 calc R U . . .
C18B C 1.1071(2) 0.3360(2) 0.06049(15) 0.0234(4) Uani 1 1 d . . . . .
H18B H 1.183436 0.243300 0.028084 0.028 Uiso 1 1 calc R U . . .
C19B C 1.0264(2) 0.3208(2) 0.16293(14) 0.0208(4) Uani 1 1 d . . . . .
H19B H 1.048101 0.217290 0.200782 0.025 Uiso 1 1 calc R U . . .
C20B C 0.9142(2) 0.4556(2) 0.21073(13) 0.0166(3) Uani 1 1 d . . . . .
C21B C 0.8423(2) 0.4664(2) 0.40050(14) 0.0206(4) Uani 1 1 d . . . . .
H21B H 0.917071 0.507986 0.400089 0.025 Uiso 1 1 calc R U . . .
C22B C 0.7086(2) 0.37510(19) 0.35150(14) 0.0177(4) Uani 1 1 d . . . . .
H1NB H 0.418(3) 0.357(3) 0.2955(17) 0.022(6) Uiso 1 1 d . . . . .
H2NB H 0.401(3) 0.880(3) 0.2428(17) 0.016(5) Uiso 1 1 d . . . . .
H3NB H 0.655(3) 0.868(3) 0.0921(19) 0.024(6) Uiso 1 1 d . . . . .
H1NA H 0.998(3) -0.162(3) 0.8075(17) 0.020(5) Uiso 1 1 d . . . . .
H2NA H 0.561(3) 0.364(3) 0.7347(17) 0.018(5) Uiso 1 1 d . . . . .
H3NA H 0.491(3) 0.328(3) 0.5727(19) 0.026(5) Uiso 1 1 d . . . . .

loop_
_atom_site_aniso_label
_atom_site_aniso_U_11
_atom_site_aniso_U_22
_atom_site_aniso_U_33
_atom_site_aniso_U_23
_atom_site_aniso_U_13
_atom_site_aniso_U_12
O1A 0.0164(6) 0.0183(6) 0.0289(7) -0.0029(5) -0.0089(5) -0.0049(5)
O2A 0.0172(6) 0.0209(6) 0.0254(7) -0.0086(5) -0.0050(5) -0.0016(5)
O3A 0.0191(6) 0.0235(6) 0.0197(7) -0.0044(5) 0.0014(5) -0.0078(5)
N1A 0.0129(8) 0.0183(7) 0.0252(9) -0.0030(6) -0.0065(6) -0.0029(6)
N2A 0.0147(7) 0.0156(7) 0.0201(8) -0.0053(6) -0.0051(6) -0.0035(6)
N3A 0.0152(7) 0.0166(7) 0.0160(8) -0.0036(6) -0.0019(6) -0.0049(6)
N4A 0.0186(7) 0.0180(7) 0.0146(8) -0.0018(6) -0.0031(6) -0.0079(6)
N5A 0.0212(8) 0.0218(7) 0.0189(8) -0.0042(6) -0.0012(6) -0.0070(6)
N6A 0.0219(8) 0.0193(7) 0.0171(9) -0.0028(6) -0.0049(6) -0.0070(6)
C1A 0.0189(9) 0.0174(8) 0.0203(10) -0.0038(7) -0.0049(7) -0.0050(7)
C2A 0.0147(8) 0.0205(8) 0.0159(9) -0.0054(7) -0.0030(7) -0.0047(7)
C3A 0.0153(8) 0.0221(9) 0.0293(11) -0.0079(7) -0.0057(7) -0.0056(7)
C4A 0.0168(8) 0.0223(9) 0.0244(10) -0.0037(7) -0.0042(7) -0.0096(7)
C5A 0.0199(9) 0.0138(8) 0.0224(10) 0.0005(7) -0.0059(7) -0.0093(7)
C6A 0.0204(9) 0.0210(9) 0.0275(11) -0.0020(7) -0.0084(7) -0.0108(7)
C7A 0.0294(10) 0.0240(9) 0.0239(10) 0.0000(7) -0.0105(8) -0.0160(8)
C8A 0.0278(10) 0.0207(9) 0.0182(10) -0.0019(7) -0.0028(7) -0.0131(8)
C9A 0.0195(9) 0.0194(8) 0.0196(10) -0.0007(7) -0.0043(7) -0.0091(7)
C10A 0.0200(9) 0.0146(8) 0.0183(10) 0.0014(7) -0.0061(7) -0.0097(7)
C11A 0.0150(8) 0.0160(8) 0.0173(9) 0.0001(6) -0.0029(7) -0.0071(7)
C12A 0.0180(8) 0.0165(8) 0.0170(9) -0.0011(6) -0.0041(7) -0.0062(7)
C13A 0.0249(10) 0.0239(9) 0.0289(11) -0.0068(8) -0.0142(8) -0.0019(8)
C14A 0.0122(8) 0.0196(8) 0.0159(9) -0.0016(7) -0.0051(7) -0.0047(7)
C15A 0.0125(8) 0.0206(9) 0.0180(9) -0.0028(7) -0.0030(7) -0.0085(7)
C16A 0.0207(9) 0.0239(9) 0.0179(10) -0.0009(7) -0.0069(7) -0.0103(7)
C17A 0.0254(9) 0.0329(10) 0.0184(10) -0.0065(8) -0.0055(7) -0.0154(8)
C18A 0.0279(9) 0.0255(9) 0.0248(10) -0.0101(8) -0.0033(8) -0.0148(8)
C19A 0.0252(9) 0.0193(9) 0.0215(10) -0.0005(7) -0.0056(7) -0.0124(7)
C20A 0.0160(8) 0.0217(9) 0.0148(9) -0.0026(7) -0.0017(7) -0.0111(7)
C21A 0.0168(8) 0.0211(9) 0.0178(10) -0.0021(7) -0.0010(7) -0.0080(7)
C22A 0.0202(8) 0.0129(8) 0.0173(9) 0.0002(6) -0.0068(7) -0.0067(7)
O1B 0.0199(6) 0.0190(6) 0.0283(7) -0.0047(5) -0.0038(5) -0.0115(5)
O2B 0.0257(7) 0.0185(6) 0.0276(8) -0.0081(5) -0.0006(5) -0.0117(5)
O3B 0.0339(7) 0.0232(6) 0.0208(7) -0.0033(5) -0.0121(6) -0.0125(6)
N1B 0.0216(8) 0.0189(7) 0.0281(9) -0.0040(6) -0.0046(6) -0.0137(7)
N2B 0.0174(7) 0.0155(7) 0.0201(8) -0.0055(6) -0.0015(6) -0.0081(6)
N3B 0.0188(7) 0.0178(7) 0.0159(8) -0.0044(6) -0.0036(6) -0.0088(6)
N4B 0.0187(7) 0.0186(7) 0.0154(8) -0.0021(6) -0.0028(6) -0.0090(6)
N5B 0.0301(8) 0.0231(8) 0.0176(8) -0.0042(6) -0.0041(7) -0.0123(7)
N6B 0.0254(8) 0.0209(8) 0.0171(8) -0.0035(6) -0.0012(6) -0.0111(6)
C1B 0.0220(9) 0.0182(8) 0.0220(10) -0.0059(7) -0.0026(7) -0.0095(7)
C2B 0.0202(9) 0.0211(8) 0.0173(9) -0.0074(7) -0.0007(7) -0.0112(7)
C3B 0.0202(9) 0.0245(9) 0.0278(11) -0.0093(8) -0.0030(7) -0.0124(7)
C4B 0.0176(8) 0.0229(9) 0.0233(10) -0.0045(7) -0.0060(7) -0.0102(7)
C5B 0.0165(8) 0.0147(8) 0.0198(10) -0.0010(6) -0.0065(7) -0.0053(7)
C6B 0.0169(8) 0.0200(9) 0.0251(10) -0.0018(7) -0.0062(7) -0.0082(7)
C7B 0.0170(9) 0.0229(9) 0.0216(10) -0.0006(7) -0.0018(7) -0.0072(7)
C8B 0.0240(9) 0.0213(9) 0.0178(10) -0.0041(7) -0.0032(7) -0.0075(7)
C9B 0.0217(9) 0.0204(9) 0.0206(10) -0.0030(7) -0.0057(7) -0.0100(7)
C10B 0.0158(8) 0.0132(8) 0.0179(9) 0.0002(6) -0.0045(7) -0.0057(7)
C11B 0.0194(8) 0.0147(8) 0.0174(9) 0.0000(6) -0.0068(7) -0.0082(7)
C12B 0.0186(9) 0.0175(8) 0.0210(10) -0.0039(7) -0.0040(7) -0.0104(7)
C13B 0.0322(11) 0.0181(9) 0.0262(11) -0.0001(7) -0.0021(8) -0.0119(8)
C14B 0.0181(8) 0.0200(8) 0.0168(9) -0.0016(6) -0.0031(7) -0.0131(7)
C15B 0.0141(8) 0.0206(8) 0.0173(9) -0.0024(7) -0.0046(6) -0.0091(7)
C16B 0.0169(8) 0.0253(9) 0.0173(10) -0.0002(7) -0.0036(7) -0.0120(7)
C17B 0.0162(8) 0.0333(10) 0.0173(10) -0.0056(7) 0.0008(7) -0.0115(7)
C18B 0.0149(8) 0.0268(9) 0.0234(11) -0.0092(8) -0.0006(7) -0.0045(7)
C19B 0.0184(8) 0.0188(8) 0.0224(10) -0.0021(7) -0.0062(7) -0.0054(7)
C20B 0.0153(8) 0.0230(9) 0.0128(9) -0.0011(6) -0.0037(6) -0.0096(7)
C21B 0.0268(9) 0.0206(9) 0.0181(10) -0.0018(7) -0.0082(8) -0.0117(8)
C22B 0.0181(8) 0.0141(8) 0.0186(10) -0.0022(6) -0.0023(7) -0.0063(7)

_geom_special_details            
; 
 All esds (except the esd in the dihedral angle between two l.s. planes) 
 are estimated using the full covariance matrix.  The cell esds are taken 
 into account individually in the estimation of esds in distances, angles 
 and torsion angles; correlations between esds in cell parameters are only 
 used when they are defined by crystal symmetry.  An approximate (isotropic) 
 treatment of cell esds is used for estimating esds involving l.s. planes. 
;

loop_
_geom_bond_atom_site_label_1
_geom_bond_atom_site_label_2
_geom_bond_distance
_geom_bond_site_symmetry_2
_geom_bond_publ_flag
O1A C2A 1.234(2) . ?
O2A C11A 1.232(2) . ?
O3A C14A 1.232(2) . ?
N1A C2A 1.344(2) . ?
N1A C1A 1.455(2) . ?
N1A H1NA 0.85(2) . ?
N2A C11A 1.353(2) . ?
N2A C10A 1.412(2) . ?
N2A H2NA 0.88(2) . ?
N3A C14A 1.340(2) . ?
N3A C12A 1.460(2) . ?
N3A H3NA 0.90(2) . ?
N4A C21A 1.363(2) . ?
N4A C22A 1.370(2) . ?
N4A C20A 1.437(2) . ?
N5A C21A 1.300(2) . ?
N5A N6A 1.395(2) . ?
N6A C22A 1.302(2) . ?
C1A C22A 1.496(2) . ?
C1A H1AA 0.9900 . ?
C1A H1AB 0.9900 . ?
C2A C3A 1.511(3) . ?
C3A C4A 1.534(2) . ?
C3A H3AA 0.9900 . ?
C3A H3AB 0.9900 . ?
C4A C5A 1.518(3) . ?
C4A H4AA 0.9900 . ?
C4A H4AB 0.9900 . ?
C5A C6A 1.397(3) . ?
C5A C10A 1.411(2) . ?
C6A C7A 1.385(3) . ?
C6A H6AA 0.9500 . ?
C7A C8A 1.384(3) . ?
C7A H7AA 0.9500 . ?
C8A C9A 1.384(3) . ?
C8A H8AA 0.9500 . ?
C9A C10A 1.398(2) . ?
C9A H9AA 0.9500 . ?
C11A C12A 1.527(2) . ?
C12A C13A 1.518(2) . ?
C12A H12A 1.0000 . ?
C13A H13A 0.9800 . ?
C13A H13B 0.9800 . ?
C13A H13C 0.9800 . ?
C14A C15A 1.509(2) . ?
C15A C20A 1.397(2) . ?
C15A C16A 1.397(3) . ?
C16A C17A 1.385(3) . ?
C16A H16A 0.9500 . ?
C17A C18A 1.386(3) . ?
C17A H17A 0.9500 . ?
C18A C19A 1.385(3) . ?
C18A H18A 0.9500 . ?
C19A C20A 1.385(2) . ?
C19A H19A 0.9500 . ?
C21A H21A 0.9500 . ?
O1B C2B 1.231(2) . ?
O2B C11B 1.238(2) . ?
O3B C14B 1.231(2) . ?
N1B C2B 1.340(2) . ?
N1B C1B 1.454(2) . ?
N1B H1NB 0.82(2) . ?
N2B C11B 1.341(2) . ?
N2B C10B 1.423(2) . ?
N2B H2NB 0.87(2) . ?
N3B C14B 1.341(2) . ?
N3B C12B 1.454(2) . ?
N3B H3NB 0.85(3) . ?
N4B C21B 1.366(2) . ?
N4B C22B 1.368(2) . ?
N4B C20B 1.431(2) . ?
N5B C21B 1.302(2) . ?
N5B N6B 1.392(2) . ?
N6B C22B 1.301(2) . ?
C1B C22B 1.499(2) . ?
C1B H1BA 0.9900 . ?
C1B H1BB 0.9900 . ?
C2B C3B 1.517(3) . ?
C3B C4B 1.534(3) . ?
C3B H3BA 0.9900 . ?
C3B H3BB 0.9900 . ?
C4B C5B 1.515(2) . ?
C4B H4BA 0.9900 . ?
C4B H4BB 0.9900 . ?
C5B C6B 1.401(3) . ?
C5B C10B 1.404(2) . ?
C6B C7B 1.379(3) . ?
C6B H6BA 0.9500 . ?
C7B C8B 1.387(3) . ?
C7B H7BA 0.9500 . ?
C8B C9B 1.379(3) . ?
C8B H8BA 0.9500 . ?
C9B C10B 1.398(3) . ?
C9B H9BA 0.9500 . ?
C11B C12B 1.530(2) . ?
C12B C13B 1.526(3) . ?
C12B H12B 1.0000 . ?
C13B H13D 0.9800 . ?
C13B H13E 0.9800 . ?
C13B H13F 0.9800 . ?
C14B C15B 1.502(2) . ?
C15B C16B 1.394(3) . ?
C15B C20B 1.406(2) . ?
C16B C17B 1.389(3) . ?
C16B H16B 0.9500 . ?
C17B C18B 1.382(3) . ?
C17B H17B 0.9500 . ?
C18B C19B 1.385(3) . ?
C18B H18B 0.9500 . ?
C19B C20B 1.388(2) . ?
C19B H19B 0.9500 . ?
C21B H21B 0.9500 . ?

loop_
_geom_angle_atom_site_label_1
_geom_angle_atom_site_label_2
_geom_angle_atom_site_label_3
_geom_angle
_geom_angle_site_symmetry_1
_geom_angle_site_symmetry_3
_geom_angle_publ_flag
C2A N1A C1A 119.01(15) . . ?
C2A N1A H1NA 118.4(14) . . ?
C1A N1A H1NA 117.4(14) . . ?
C11A N2A C10A 127.64(15) . . ?
C11A N2A H2NA 116.2(14) . . ?
C10A N2A H2NA 116.2(14) . . ?
C14A N3A C12A 122.83(15) . . ?
C14A N3A H3NA 121.4(14) . . ?
C12A N3A H3NA 115.4(14) . . ?
C21A N4A C22A 104.22(15) . . ?
C21A N4A C20A 128.31(15) . . ?
C22A N4A C20A 127.46(15) . . ?
C21A N5A N6A 106.21(14) . . ?
C22A N6A N5A 107.83(14) . . ?
N1A C1A C22A 112.60(14) . . ?
N1A C1A H1AA 109.1 . . ?
C22A C1A H1AA 109.1 . . ?
N1A C1A H1AB 109.1 . . ?
C22A C1A H1AB 109.1 . . ?
H1AA C1A H1AB 107.8 . . ?
O1A C2A N1A 120.99(16) . . ?
O1A C2A C3A 122.58(16) . . ?
N1A C2A C3A 116.44(15) . . ?
C2A C3A C4A 113.17(14) . . ?
C2A C3A H3AA 108.9 . . ?
C4A C3A H3AA 108.9 . . ?
C2A C3A H3AB 108.9 . . ?
C4A C3A H3AB 108.9 . . ?
H3AA C3A H3AB 107.8 . . ?
C5A C4A C3A 113.42(15) . . ?
C5A C4A H4AA 108.9 . . ?
C3A C4A H4AA 108.9 . . ?
C5A C4A H4AB 108.9 . . ?
C3A C4A H4AB 108.9 . . ?
H4AA C4A H4AB 107.7 . . ?
C6A C5A C10A 118.18(16) . . ?
C6A C5A C4A 117.52(16) . . ?
C10A C5A C4A 124.23(16) . . ?
C7A C6A C5A 121.88(17) . . ?
C7A C6A H6AA 119.1 . . ?
C5A C6A H6AA 119.1 . . ?
C8A C7A C6A 119.25(17) . . ?
C8A C7A H7AA 120.4 . . ?
C6A C7A H7AA 120.4 . . ?
C7A C8A C9A 120.45(18) . . ?
C7A C8A H8AA 119.8 . . ?
C9A C8A H8AA 119.8 . . ?
C8A C9A C10A 120.53(16) . . ?
C8A C9A H9AA 119.7 . . ?
C10A C9A H9AA 119.7 . . ?
C9A C10A C5A 119.65(16) . . ?
C9A C10A N2A 121.41(15) . . ?
C5A C10A N2A 118.90(15) . . ?
O2A C11A N2A 123.98(17) . . ?
O2A C11A C12A 121.15(15) . . ?
N2A C11A C12A 114.60(15) . . ?
N3A C12A C13A 112.00(14) . . ?
N3A C12A C11A 113.71(14) . . ?
C13A C12A C11A 113.39(14) . . ?
N3A C12A H12A 105.6 . . ?
C13A C12A H12A 105.6 . . ?
C11A C12A H12A 105.6 . . ?
C12A C13A H13A 109.5 . . ?
C12A C13A H13B 109.5 . . ?
H13A C13A H13B 109.5 . . ?
C12A C13A H13C 109.5 . . ?
H13A C13A H13C 109.5 . . ?
H13B C13A H13C 109.5 . . ?
O3A C14A N3A 123.84(16) . . ?
O3A C14A C15A 122.49(16) . . ?
N3A C14A C15A 113.63(15) . . ?
C20A C15A C16A 117.64(15) . . ?
C20A C15A C14A 123.06(15) . . ?
C16A C15A C14A 119.30(15) . . ?
C17A C16A C15A 121.49(17) . . ?
C17A C16A H16A 119.3 . . ?
C15A C16A H16A 119.3 . . ?
C16A C17A C18A 120.08(17) . . ?
C16A C17A H17A 120.0 . . ?
C18A C17A H17A 120.0 . . ?
C19A C18A C17A 119.20(17) . . ?
C19A C18A H18A 120.4 . . ?
C17A C18A H18A 120.4 . . ?
C18A C19A C20A 120.75(17) . . ?
C18A C19A H19A 119.6 . . ?
C20A C19A H19A 119.6 . . ?
C19A C20A C15A 120.81(16) . . ?
C19A C20A N4A 117.45(15) . . ?
C15A C20A N4A 121.66(15) . . ?
N5A C21A N4A 111.55(15) . . ?
N5A C21A H21A 124.2 . . ?
N4A C21A H21A 124.2 . . ?
N6A C22A N4A 110.18(15) . . ?
N6A C22A C1A 125.78(16) . . ?
N4A C22A C1A 124.02(16) . . ?
C2B N1B C1B 120.01(15) . . ?
C2B N1B H1NB 118.8(15) . . ?
C1B N1B H1NB 119.0(15) . . ?
C11B N2B C10B 126.22(14) . . ?
C11B N2B H2NB 116.7(14) . . ?
C10B N2B H2NB 117.0(14) . . ?
C14B N3B C12B 120.34(15) . . ?
C14B N3B H3NB 120.8(15) . . ?
C12B N3B H3NB 118.7(15) . . ?
C21B N4B C22B 104.34(15) . . ?
C21B N4B C20B 128.49(14) . . ?
C22B N4B C20B 127.15(15) . . ?
C21B N5B N6B 106.35(15) . . ?
C22B N6B N5B 107.95(14) . . ?
N1B C1B C22B 112.84(14) . . ?
N1B C1B H1BA 109.0 . . ?
C22B C1B H1BA 109.0 . . ?
N1B C1B H1BB 109.0 . . ?
C22B C1B H1BB 109.0 . . ?
H1BA C1B H1BB 107.8 . . ?
O1B C2B N1B 121.41(16) . . ?
O1B C2B C3B 122.66(16) . . ?
N1B C2B C3B 115.91(15) . . ?
C2B C3B C4B 113.36(14) . . ?
C2B C3B H3BA 108.9 . . ?
C4B C3B H3BA 108.9 . . ?
C2B C3B H3BB 108.9 . . ?
C4B C3B H3BB 108.9 . . ?
H3BA C3B H3BB 107.7 . . ?
C5B C4B C3B 113.20(15) . . ?
C5B C4B H4BA 108.9 . . ?
C3B C4B H4BA 108.9 . . ?
C5B C4B H4BB 108.9 . . ?
C3B C4B H4BB 108.9 . . ?
H4BA C4B H4BB 107.8 . . ?
C6B C5B C10B 118.02(16) . . ?
C6B C5B C4B 117.70(15) . . ?
C10B C5B C4B 124.26(15) . . ?
C7B C6B C5B 121.79(17) . . ?
C7B C6B H6BA 119.1 . . ?
C5B C6B H6BA 119.1 . . ?
C6B C7B C8B 119.47(17) . . ?
C6B C7B H7BA 120.3 . . ?
C8B C7B H7BA 120.3 . . ?
C9B C8B C7B 120.26(17) . . ?
C9B C8B H8BA 119.9 . . ?
C7B C8B H8BA 119.9 . . ?
C8B C9B C10B 120.51(17) . . ?
C8B C9B H9BA 119.7 . . ?
C10B C9B H9BA 119.7 . . ?
C9B C10B C5B 119.93(16) . . ?
C9B C10B N2B 120.57(15) . . ?
C5B C10B N2B 119.50(15) . . ?
O2B C11B N2B 124.35(16) . . ?
O2B C11B C12B 118.16(14) . . ?
N2B C11B C12B 117.50(14) . . ?
N3B C12B C13B 110.49(15) . . ?
N3B C12B C11B 115.24(13) . . ?
C13B C12B C11B 109.97(14) . . ?
N3B C12B H12B 106.9 . . ?
C13B C12B H12B 106.9 . . ?
C11B C12B H12B 106.9 . . ?
C12B C13B H13D 109.5 . . ?
C12B C13B H13E 109.5 . . ?
H13D C13B H13E 109.5 . . ?
C12B C13B H13F 109.5 . . ?
H13D C13B H13F 109.5 . . ?
H13E C13B H13F 109.5 . . ?
O3B C14B N3B 122.51(16) . . ?
O3B C14B C15B 121.61(15) . . ?
N3B C14B C15B 115.77(15) . . ?
C16B C15B C20B 117.90(16) . . ?
C16B C15B C14B 119.64(15) . . ?
C20B C15B C14B 122.38(16) . . ?
C17B C16B C15B 121.26(17) . . ?
C17B C16B H16B 119.4 . . ?
C15B C16B H16B 119.4 . . ?
C18B C17B C16B 120.10(17) . . ?
C18B C17B H17B 119.9 . . ?
C16B C17B H17B 119.9 . . ?
C17B C18B C19B 119.67(17) . . ?
C17B C18B H18B 120.2 . . ?
C19B C18B H18B 120.2 . . ?
C18B C19B C20B 120.53(17) . . ?
C18B C19B H19B 119.7 . . ?
C20B C19B H19B 119.7 . . ?
C19B C20B C15B 120.52(16) . . ?
C19B C20B N4B 118.02(15) . . ?
C15B C20B N4B 121.36(15) . . ?
N5B C21B N4B 111.22(16) . . ?
N5B C21B H21B 124.4 . . ?
N4B C21B H21B 124.4 . . ?
N6B C22B N4B 110.14(15) . . ?
N6B C22B C1B 125.15(16) . . ?
N4B C22B C1B 124.70(16) . . ?

loop_
_geom_torsion_atom_site_label_1
_geom_torsion_atom_site_label_2
_geom_torsion_atom_site_label_3
_geom_torsion_atom_site_label_4
_geom_torsion
_geom_torsion_site_symmetry_1
_geom_torsion_site_symmetry_2
_geom_torsion_site_symmetry_3
_geom_torsion_site_symmetry_4
_geom_torsion_publ_flag
C21A N5A N6A C22A -0.03(18) . . . . ?
C2A N1A C1A C22A -60.8(2) . . . . ?
C1A N1A C2A O1A 7.7(3) . . . . ?
C1A N1A C2A C3A -172.00(15) . . . . ?
O1A C2A C3A C4A 11.9(3) . . . . ?
N1A C2A C3A C4A -168.39(16) . . . . ?
C2A C3A C4A C5A 75.4(2) . . . . ?
C3A C4A C5A C6A 77.2(2) . . . . ?
C3A C4A C5A C10A -105.92(19) . . . . ?
C10A C5A C6A C7A -1.9(3) . . . . ?
C4A C5A C6A C7A 175.10(16) . . . . ?
C5A C6A C7A C8A -0.1(3) . . . . ?
C6A C7A C8A C9A 2.0(3) . . . . ?
C7A C8A C9A C10A -1.7(3) . . . . ?
C8A C9A C10A C5A -0.5(2) . . . . ?
C8A C9A C10A N2A -178.26(16) . . . . ?
C6A C5A C10A C9A 2.2(2) . . . . ?
C4A C5A C10A C9A -174.62(16) . . . . ?
C6A C5A C10A N2A -179.93(16) . . . . ?
C4A C5A C10A N2A 3.2(2) . . . . ?
C11A N2A C10A C9A 27.6(3) . . . . ?
C11A N2A C10A C5A -150.25(16) . . . . ?
C10A N2A C11A O2A -5.7(3) . . . . ?
C10A N2A C11A C12A 168.40(16) . . . . ?
C14A N3A C12A C13A -64.0(2) . . . . ?
C14A N3A C12A C11A 66.2(2) . . . . ?
O2A C11A C12A N3A -151.27(16) . . . . ?
N2A C11A C12A N3A 34.4(2) . . . . ?
O2A C11A C12A C13A -21.8(2) . . . . ?
N2A C11A C12A C13A 163.93(15) . . . . ?
C12A N3A C14A O3A -9.5(3) . . . . ?
C12A N3A C14A C15A 168.30(15) . . . . ?
O3A C14A C15A C20A -47.6(2) . . . . ?
N3A C14A C15A C20A 134.57(16) . . . . ?
O3A C14A C15A C16A 131.91(18) . . . . ?
N3A C14A C15A C16A -45.9(2) . . . . ?
C20A C15A C16A C17A -1.7(3) . . . . ?
C14A C15A C16A C17A 178.74(16) . . . . ?
C15A C16A C17A C18A 0.3(3) . . . . ?
C16A C17A C18A C19A 0.8(3) . . . . ?
C17A C18A C19A C20A -0.6(3) . . . . ?
C18A C19A C20A C15A -0.8(3) . . . . ?
C18A C19A C20A N4A -177.51(16) . . . . ?
C16A C15A C20A C19A 1.9(2) . . . . ?
C14A C15A C20A C19A -178.54(16) . . . . ?
C16A C15A C20A N4A 178.47(15) . . . . ?
C14A C15A C20A N4A -2.0(2) . . . . ?
C21A N4A C20A C19A -114.89(19) . . . . ?
C22A N4A C20A C19A 64.2(2) . . . . ?
C21A N4A C20A C15A 68.4(2) . . . . ?
C22A N4A C20A C15A -112.49(19) . . . . ?
N6A N5A C21A N4A -0.13(19) . . . . ?
C22A N4A C21A N5A 0.24(19) . . . . ?
C20A N4A C21A N5A 179.49(15) . . . . ?
N5A N6A C22A N4A 0.18(18) . . . . ?
N5A N6A C22A C1A -178.62(15) . . . . ?
C21A N4A C22A N6A -0.25(18) . . . . ?
C20A N4A C22A N6A -179.51(15) . . . . ?
C21A N4A C22A C1A 178.57(16) . . . . ?
C20A N4A C22A C1A -0.7(3) . . . . ?
N1A C1A C22A N6A -61.1(2) . . . . ?
N1A C1A C22A N4A 120.26(18) . . . . ?
C21B N5B N6B C22B -0.11(19) . . . . ?
C2B N1B C1B C22B 60.5(2) . . . . ?
C1B N1B C2B O1B -7.5(3) . . . . ?
C1B N1B C2B C3B 170.89(16) . . . . ?
O1B C2B C3B C4B -11.3(3) . . . . ?
N1B C2B C3B C4B 170.38(16) . . . . ?
C2B C3B C4B C5B -77.5(2) . . . . ?
C3B C4B C5B C6B -75.2(2) . . . . ?
C3B C4B C5B C10B 106.32(18) . . . . ?
C10B C5B C6B C7B 1.5(2) . . . . ?
C4B C5B C6B C7B -177.04(16) . . . . ?
C5B C6B C7B C8B -0.3(3) . . . . ?
C6B C7B C8B C9B -1.0(3) . . . . ?
C7B C8B C9B C10B 1.0(3) . . . . ?
C8B C9B C10B C5B 0.3(3) . . . . ?
C8B C9B C10B N2B -179.22(16) . . . . ?
C6B C5B C10B C9B -1.5(2) . . . . ?
C4B C5B C10B C9B 176.95(16) . . . . ?
C6B C5B C10B N2B 177.99(15) . . . . ?
C4B C5B C10B N2B -3.6(2) . . . . ?
C11B N2B C10B C9B -30.2(3) . . . . ?
C11B N2B C10B C5B 150.33(16) . . . . ?
C10B N2B C11B O2B -1.9(3) . . . . ?
C10B N2B C11B C12B 178.38(16) . . . . ?
C14B N3B C12B C13B 148.31(16) . . . . ?
C14B N3B C12B C11B -86.30(19) . . . . ?
O2B C11B C12B N3B 169.41(15) . . . . ?
N2B C11B C12B N3B -10.9(2) . . . . ?
O2B C11B C12B C13B -64.9(2) . . . . ?
N2B C11B C12B C13B 114.78(17) . . . . ?
C12B N3B C14B O3B 8.8(2) . . . . ?
C12B N3B C14B C15B -167.39(14) . . . . ?
O3B C14B C15B C16B -132.75(18) . . . . ?
N3B C14B C15B C16B 43.5(2) . . . . ?
O3B C14B C15B C20B 43.9(2) . . . . ?
N3B C14B C15B C20B -139.87(16) . . . . ?
C20B C15B C16B C17B 1.3(2) . . . . ?
C14B C15B C16B C17B 178.09(16) . . . . ?
C15B C16B C17B C18B -0.7(3) . . . . ?
C16B C17B C18B C19B -0.1(3) . . . . ?
C17B C18B C19B C20B 0.3(3) . . . . ?
C18B C19B C20B C15B 0.4(3) . . . . ?
C18B C19B C20B N4B 176.87(16) . . . . ?
C16B C15B C20B C19B -1.1(2) . . . . ?
C14B C15B C20B C19B -177.84(15) . . . . ?
C16B C15B C20B N4B -177.51(15) . . . . ?
C14B C15B C20B N4B 5.8(2) . . . . ?
C21B N4B C20B C19B 114.1(2) . . . . ?
C22B N4B C20B C19B -67.7(2) . . . . ?
C21B N4B C20B C15B -69.4(2) . . . . ?
C22B N4B C20B C15B 108.72(19) . . . . ?
N6B N5B C21B N4B 0.4(2) . . . . ?
C22B N4B C21B N5B -0.47(19) . . . . ?
C20B N4B C21B N5B 178.00(16) . . . . ?
N5B N6B C22B N4B -0.18(19) . . . . ?
N5B N6B C22B C1B 178.36(16) . . . . ?
C21B N4B C22B N6B 0.39(19) . . . . ?
C20B N4B C22B N6B -178.11(15) . . . . ?
C21B N4B C22B C1B -178.16(16) . . . . ?
C20B N4B C22B C1B 3.3(3) . . . . ?
N1B C1B C22B N6B 61.1(2) . . . . ?
N1B C1B C22B N4B -120.56(18) . . . . ?

loop_
_geom_hbond_atom_site_label_D
_geom_hbond_atom_site_label_H
_geom_hbond_atom_site_label_A
_geom_hbond_distance_DH
_geom_hbond_distance_HA
_geom_hbond_distance_DA
_geom_hbond_angle_DHA
_geom_hbond_site_symmetry_A
N1B H1NB O2B 0.82(2) 2.07(2) 2.881(2) 168(2) 1_545
N2B H2NB O1B 0.87(2) 2.07(2) 2.8617(19) 151.8(19) .
N2B H2NB N3B 0.87(2) 2.35(2) 2.782(2) 111.0(16) .
N3B H3NB N6A 0.85(3) 2.09(3) 2.918(2) 164(2) 1_564
N1A H1NA O2A 0.85(2) 2.07(2) 2.900(2) 165(2) 1_645
N2A H2NA O1A 0.88(2) 2.03(2) 2.8171(19) 149(2) .
N2A H2NA N3A 0.88(2) 2.36(2) 2.785(2) 109.9(16) .
N3A H3NA N6B 0.90(2) 2.00(2) 2.822(2) 151(2) .

_refine_diff_density_max         0.129
_refine_diff_density_min         -0.121
_refine_diff_density_rms         0.027

_shelx_res_file                  
; 
TITL d18119_a.res in P1 
    d18119_a.res 
    created by SHELXL-2016/6 at 11:52:00 on 01-Aug-2018 
REM Old TITL d18119 in P1 
  
REM SHELXT solution in P1 
REM R1 0.065,  Rweak 0.035,  Alpha 0.000,  Orientation as input 
REM Flack x =  0.086 ( 0.033 ) from Parsons' quotients 
REM Formula found by SHELXT:  C44 N12 O6 
  
CELL  1.54178   9.2698   9.6100  13.8726   74.529   71.442   61.312 
ZERR    2.000   0.0003   0.0003   0.0005    0.001    0.001    0.001 
LATT -1 
SFAC C H N O 
UNIT 44 44 12 6 
TEMP -123.170 
SIZE 0.13 0.15 0.16 
ACTA 
L.S. 5 
BOND $H 
CONF 
HTAB 
FMAP 2 
HTAB C9A O2A 
HTAB C13A O3A 
HTAB C9B O2B 
EQIV $1 x, y-1, z 
HTAB N1B O2B_$1 
HTAB N2B O1B 
HTAB N2B N3B 
EQIV $2 x, y+1, z-1 
HTAB N3B N6A_$2 
EQIV $3 x+1, y-1, z 
HTAB N1A O2A_$3 
HTAB N2A O1A 
HTAB N2A N3A 
HTAB N3A N6B 
  
PLAN 20 
WGHT    0.025100    0.158000 
EXTI    0.008640 
FVAR       1.18851 
O1A   4    0.705145    0.124601    0.741631    11.00000    0.01640    0.01831 = 
         0.02892   -0.00287   -0.00887   -0.00494 
O2A   4    0.249786    0.673505    0.781092    11.00000    0.01718    0.02089 = 
         0.02538   -0.00862   -0.00497   -0.00159 
O3A   4    0.244868    0.285483    0.775093    11.00000    0.01906    0.02355 = 
         0.01973   -0.00443    0.00144   -0.00780 
N1A   3    0.894430   -0.106867    0.806877    11.00000    0.01291    0.01835 = 
         0.02515   -0.00296   -0.00649   -0.00293 
N2A   3    0.500786    0.449444    0.766638    11.00000    0.01472    0.01558 = 
         0.02010   -0.00534   -0.00509   -0.00349 
N3A   3    0.408835    0.357127    0.630050    11.00000    0.01518    0.01659 = 
         0.01597   -0.00360   -0.00194   -0.00495 
N4A   3    0.484921   -0.062031    0.822997    11.00000    0.01858    0.01800 = 
         0.01456   -0.00184   -0.00305   -0.00790 
N5A   3    0.398531   -0.044187    0.988505    11.00000    0.02116    0.02180 = 
         0.01890   -0.00416   -0.00124   -0.00704 
N6A   3    0.574521   -0.112759    0.962478    11.00000    0.02191    0.01933 = 
         0.01711   -0.00281   -0.00491   -0.00699 
C1A   1    0.801303   -0.191714    0.804731    11.00000    0.01889    0.01741 = 
         0.02028   -0.00376   -0.00489   -0.00504 
AFIX  23 
H1AA  2    0.858916   -0.305441    0.833310    11.00000   -1.20000 
H1AB  2    0.801989   -0.188036    0.732592    11.00000   -1.20000 
AFIX   0 
C2A   1    0.840712    0.049164    0.768436    11.00000    0.01469    0.02045 = 
         0.01588   -0.00539   -0.00297   -0.00475 
C3A   1    0.955212    0.124870    0.759707    11.00000    0.01530    0.02212 = 
         0.02930   -0.00788   -0.00573   -0.00558 
AFIX  23 
H3AA  2    1.057070    0.082021    0.704639    11.00000   -1.20000 
H3AB  2    0.992071    0.094220    0.824928    11.00000   -1.20000 
AFIX   0 
C4A   1    0.870684    0.308068    0.736158    11.00000    0.01678    0.02227 = 
         0.02437   -0.00372   -0.00417   -0.00957 
AFIX  23 
H4AA  2    0.959085    0.347316    0.711173    11.00000   -1.20000 
H4AB  2    0.811486    0.339010    0.680341    11.00000   -1.20000 
AFIX   0 
C5A   1    0.745317    0.389258    0.828173    11.00000    0.01985    0.01382 = 
         0.02235    0.00046   -0.00587   -0.00934 
C6A   1    0.810204    0.400758    0.902374    11.00000    0.02043    0.02099 = 
         0.02748   -0.00199   -0.00840   -0.01077 
AFIX  43 
H6AA  2    0.928923    0.350738    0.895905    11.00000   -1.20000 
AFIX   0 
C7A   1    0.706384    0.482996    0.985085    11.00000    0.02941    0.02404 = 
         0.02387    0.00003   -0.01055   -0.01595 
AFIX  43 
H7AA  2    0.753396    0.489005    1.034666    11.00000   -1.20000 
AFIX   0 
C8A   1    0.533388    0.556322    0.994692    11.00000    0.02783    0.02070 = 
         0.01817   -0.00189   -0.00277   -0.01306 
AFIX  43 
H8AA  2    0.461504    0.615786    1.050017    11.00000   -1.20000 
AFIX   0 
C9A   1    0.464368    0.543615    0.924237    11.00000    0.01947    0.01936 = 
         0.01959   -0.00072   -0.00433   -0.00912 
AFIX  43 
H9AA  2    0.345293    0.592038    0.932609    11.00000   -1.20000 
AFIX   0 
C10A  1    0.568464    0.460114    0.840882    11.00000    0.02004    0.01457 = 
         0.01833    0.00141   -0.00614   -0.00967 
C11A  1    0.354036    0.554953    0.738606    11.00000    0.01500    0.01602 = 
         0.01733    0.00014   -0.00292   -0.00709 
C12A  1    0.333363    0.526097    0.641802    11.00000    0.01800    0.01653 = 
         0.01703   -0.00108   -0.00413   -0.00621 
AFIX  13 
H12A  2    0.398730    0.574353    0.583071    11.00000   -1.20000 
AFIX   0 
C13A  1    0.152857    0.613595    0.628477    11.00000    0.02492    0.02395 = 
         0.02895   -0.00679   -0.01418   -0.00192 
AFIX 137 
H13A  2    0.109359    0.727639    0.632421    11.00000   -1.50000 
H13B  2    0.082746    0.568862    0.682938    11.00000   -1.50000 
H13C  2    0.149929    0.600772    0.561469    11.00000   -1.50000 
AFIX   0 
C14A  1    0.351272    0.253821    0.694067    11.00000    0.01215    0.01961 = 
         0.01585   -0.00158   -0.00512   -0.00466 
C15A  1    0.424182    0.095180    0.655798    11.00000    0.01255    0.02064 = 
         0.01797   -0.00282   -0.00295   -0.00849 
C16A  1    0.432115    0.093088    0.553886    11.00000    0.02072    0.02389 = 
         0.01791   -0.00089   -0.00695   -0.01030 
AFIX  43 
H16A  2    0.389396    0.191638    0.510579    11.00000   -1.20000 
AFIX   0 
C17A  1    0.500838   -0.049385    0.514579    11.00000    0.02543    0.03291 = 
         0.01837   -0.00652   -0.00554   -0.01542 
AFIX  43 
H17A  2    0.505386   -0.047772    0.444922    11.00000   -1.20000 
AFIX   0 
C18A  1    0.562989   -0.194327    0.576743    11.00000    0.02791    0.02549 = 
         0.02483   -0.01013   -0.00333   -0.01480 
AFIX  43 
H18A  2    0.611591   -0.292391    0.549905    11.00000   -1.20000 
AFIX   0 
C19A  1    0.553394   -0.194490    0.678452    11.00000    0.02516    0.01932 = 
         0.02154   -0.00050   -0.00559   -0.01241 
AFIX  43 
H19A  2    0.594794   -0.293436    0.721643    11.00000   -1.20000 
AFIX   0 
C20A  1    0.484106   -0.052000    0.717934    11.00000    0.01599    0.02165 = 
         0.01485   -0.00263   -0.00168   -0.01106 
C21A  1    0.350484   -0.016179    0.904109    11.00000    0.01676    0.02112 = 
         0.01779   -0.00214   -0.00102   -0.00799 
AFIX  43 
H21A  2    0.235981    0.030423    0.899540    11.00000   -1.20000 
AFIX   0 
C22A  1    0.622600   -0.122339    0.864513    11.00000    0.02023    0.01289 = 
         0.01725    0.00016   -0.00678   -0.00666 
O1B   4    0.491612    0.639299    0.235229    11.00000    0.01988    0.01898 = 
         0.02830   -0.00466   -0.00376   -0.01151 
O2B   4    0.327810    1.195689    0.296525    11.00000    0.02572    0.01851 = 
         0.02756   -0.00811   -0.00061   -0.01172 
O3B   4    0.770216    0.771035    0.289779    11.00000    0.03385    0.02321 = 
         0.02079   -0.00334   -0.01210   -0.01250 
N1B   3    0.472378    0.405831    0.289843    11.00000    0.02159    0.01894 = 
         0.02811   -0.00402   -0.00456   -0.01372 
N2B   3    0.338860    0.963510    0.274539    11.00000    0.01735    0.01548 = 
         0.02006   -0.00552   -0.00152   -0.00807 
N3B   3    0.661186    0.880332    0.148838    11.00000    0.01884    0.01782 = 
         0.01588   -0.00435   -0.00360   -0.00876 
N4B   3    0.828156    0.432677    0.315193    11.00000    0.01872    0.01860 = 
         0.01542   -0.00208   -0.00278   -0.00899 
N5B   3    0.740126    0.434013    0.482420    11.00000    0.03009    0.02307 = 
         0.01761   -0.00421   -0.00412   -0.01229 
N6B   3    0.654527    0.375099    0.450341    11.00000    0.02540    0.02092 = 
         0.01711   -0.00352   -0.00122   -0.01111 
C1B   1    0.651980    0.316711    0.286827    11.00000    0.02196    0.01823 = 
         0.02198   -0.00591   -0.00256   -0.00949 
AFIX  23 
H1BA  2    0.715793    0.325510    0.214895    11.00000   -1.20000 
H1BB  2    0.678627    0.202168    0.311062    11.00000   -1.20000 
AFIX   0 
C2B   1    0.406734    0.563686    0.257784    11.00000    0.02020    0.02108 = 
         0.01734   -0.00736   -0.00075   -0.01123 
C3B   1    0.224673    0.640916    0.248401    11.00000    0.02020    0.02446 = 
         0.02777   -0.00930   -0.00303   -0.01240 
AFIX  23 
H3BA  2    0.156340    0.607111    0.312361    11.00000   -1.20000 
H3BB  2    0.218696    0.601673    0.191302    11.00000   -1.20000 
AFIX   0 
C4B   1    0.147863    0.824421    0.229012    11.00000    0.01757    0.02291 = 
         0.02329   -0.00450   -0.00597   -0.01022 
AFIX  23 
H4BA  2    0.230762    0.858099    0.176730    11.00000   -1.20000 
H4BB  2    0.046949    0.865175    0.200866    11.00000   -1.20000 
AFIX   0 
C5B   1    0.097746    0.899311    0.324761    11.00000    0.01649    0.01466 = 
         0.01980   -0.00096   -0.00648   -0.00529 
C6B   1   -0.048925    0.902342    0.396971    11.00000    0.01692    0.01995 = 
         0.02513   -0.00177   -0.00618   -0.00819 
AFIX  43 
H6BA  2   -0.108952    0.853432    0.385557    11.00000   -1.20000 
AFIX   0 
C7B   1   -0.108488    0.974377    0.484136    11.00000    0.01700    0.02293 = 
         0.02156   -0.00064   -0.00184   -0.00721 
AFIX  43 
H7BA  2   -0.208495    0.975286    0.531865    11.00000   -1.20000 
AFIX   0 
C8B   1   -0.021213    1.045525    0.501587    11.00000    0.02401    0.02135 = 
         0.01781   -0.00411   -0.00319   -0.00745 
AFIX  43 
H8BA  2   -0.062630    1.096907    0.560925    11.00000   -1.20000 
AFIX   0 
C9B   1    0.125450    1.041949    0.433122    11.00000    0.02171    0.02044 = 
         0.02059   -0.00301   -0.00568   -0.00997 
AFIX  43 
H9BA  2    0.185483    1.089393    0.446201    11.00000   -1.20000 
AFIX   0 
C10B  1    0.186465    0.969024    0.344602    11.00000    0.01584    0.01319 = 
         0.01794    0.00023   -0.00451   -0.00574 
C11B  1    0.399840    1.071815    0.256046    11.00000    0.01945    0.01469 = 
         0.01739    0.00001   -0.00679   -0.00815 
C12B  1    0.569302    1.039748    0.179344    11.00000    0.01858    0.01748 = 
         0.02099   -0.00390   -0.00400   -0.01041 
AFIX  13 
H12B  2    0.642027    1.052006    0.213389    11.00000   -1.20000 
AFIX   0 
C13B  1    0.544834    1.167192    0.085146    11.00000    0.03217    0.01806 = 
         0.02622   -0.00006   -0.00205   -0.01194 
AFIX 137 
H13D  2    0.479139    1.273672    0.107079    11.00000   -1.50000 
H13E  2    0.484425    1.151803    0.045336    11.00000   -1.50000 
H13F  2    0.655219    1.157974    0.042511    11.00000   -1.50000 
AFIX   0 
C14B  1    0.763920    0.759008    0.205179    11.00000    0.01807    0.01997 = 
         0.01678   -0.00165   -0.00309   -0.01310 
C15B  1    0.879806    0.609810    0.155757    11.00000    0.01407    0.02061 = 
         0.01725   -0.00238   -0.00461   -0.00914 
C16B  1    0.964089    0.622070    0.053051    11.00000    0.01693    0.02527 = 
         0.01733   -0.00022   -0.00359   -0.01196 
AFIX  43 
H16B  2    0.944597    0.725023    0.014790    11.00000   -1.20000 
AFIX   0 
C17B  1    1.075959    0.486670    0.005640    11.00000    0.01618    0.03327 = 
         0.01731   -0.00564    0.00082   -0.01149 
AFIX  43 
H17B  2    1.131187    0.497629   -0.064616    11.00000   -1.20000 
AFIX   0 
C18B  1    1.107083    0.336005    0.060491    11.00000    0.01490    0.02684 = 
         0.02343   -0.00919   -0.00056   -0.00453 
AFIX  43 
H18B  2    1.183436    0.243300    0.028084    11.00000   -1.20000 
AFIX   0 
C19B  1    1.026424    0.320821    0.162930    11.00000    0.01844    0.01884 = 
         0.02236   -0.00209   -0.00620   -0.00541 
AFIX  43 
H19B  2    1.048101    0.217290    0.200782    11.00000   -1.20000 
AFIX   0 
C20B  1    0.914193    0.455617    0.210731    11.00000    0.01528    0.02297 = 
         0.01279   -0.00114   -0.00374   -0.00963 
C21B  1    0.842326    0.466359    0.400502    11.00000    0.02682    0.02062 = 
         0.01813   -0.00175   -0.00817   -0.01173 
AFIX  43 
H21B  2    0.917071    0.507986    0.400089    11.00000   -1.20000 
AFIX   0 
C22B  1    0.708621    0.375095    0.351502    11.00000    0.01809    0.01409 = 
         0.01855   -0.00218   -0.00232   -0.00630 
H1NB  2    0.417563    0.356639    0.295544    11.00000    0.02218 
H2NB  2    0.400517    0.880252    0.242824    11.00000    0.01622 
H3NB  2    0.655119    0.867562    0.092097    11.00000    0.02426 
H1NA  2    0.998253   -0.161849    0.807542    11.00000    0.02017 
H2NA  2    0.561351    0.364478    0.734658    11.00000    0.01834 
H3NA  2    0.490756    0.328223    0.572676    11.00000    0.02553 
  
HKLF 4 
  
  
  
  
REM  d18119_a.res in P1 
REM R1 =  0.0207 for    6875 Fo > 4sig(Fo)  and  0.0208 for all    6917 data 
REM    586 parameters refined using      3 restraints 
  
END 
  
WGHT      0.0246      0.1604 
  
REM Instructions for potential hydrogen bonds 
HTAB C9A O2A 
HTAB C13A O3A 
HTAB C9B O2B 
HTAB N1B O2B_$1 
HTAB N2B O1B 
HTAB N2B N3B 
HTAB N3B N6A_$2 
HTAB N1A O2A_$3 
HTAB N2A O1A 
HTAB N3A N6B 
  
REM Highest difference peak  0.129,  deepest hole -0.121,  1-sigma level  0.027 
Q1    1   0.4984  1.0463  0.2197  11.00000  0.05    0.13 
Q2    1   0.4055  0.1686  0.6755  11.00000  0.05    0.12 
Q3    1   0.6140  1.0392  0.2274  11.00000  0.05    0.12 
Q4    1   0.1955  0.4159  0.8057  11.00000  0.05    0.12 
Q5    1   0.2975  0.6001  0.2751  11.00000  0.05    0.12 
Q6    1   0.6660  0.4437  0.8265  11.00000  0.05    0.12 
Q7    1   0.1747  0.7301  0.2431  11.00000  0.05    0.11 
Q8    1   1.1307  0.2978  0.7046  11.00000  0.05    0.11 
Q9    1   0.4524  0.0307  0.6848  11.00000  0.05    0.11 
Q10   1   0.8862  0.5456  0.1827  11.00000  0.05    0.11 
Q11   1   0.6729  0.3506  0.3195  11.00000  0.05    0.11 
Q12   1   0.3969  0.9830  0.3123  11.00000  0.05    0.11 
Q13   1   0.2404  0.5652  0.6443  11.00000  0.05    0.10 
Q14   1   0.7099 -0.1327  0.8303  11.00000  0.05    0.10 
Q15   1   0.3207  1.0416  0.2160  11.00000  0.05    0.10 
Q16   1   0.8027  0.3570  0.7803  11.00000  0.05    0.10 
Q17   1   0.4577  0.4712  0.2371  11.00000  0.05    0.10 
Q18   1   0.3165  1.3138  0.2438  11.00000  0.05    0.10 
Q19   1   0.1206  0.9749  0.3224  11.00000  0.05    0.10 
Q20   1   0.8944  0.0994  0.7798  11.00000  0.05    0.10 
;
_shelx_res_checksum              34454

_shelx_hkl_file                  
; 
  -1   0   0 4086.19  143.39 
  -1   0   0 4298.77  143.99 
   1   0   0 4202.58  142.89 
   1   0   0 4430.06  143.59 
   1   0   0 4308.47  143.09 
  -2   0   0 1372.66   47.70 
  -2   0   0 1436.76   47.70 
   2   0   0 1427.96   47.60 
   2   0   0 1419.66   48.10 
   2   0   0 1434.46   47.40 
   2   0   0 1393.56   47.90 
  -3   0   0  816.82   27.10 
  -3   0   0  809.72   27.00 
  -3   0   0  761.02   27.00 
  -3   0   0  756.82   26.70 
   3   0   0  782.02   27.40 
   3   0   0  801.32   26.80 
   3   0   0  794.42   26.40 
   3   0   0  754.02   26.80 
   3   0   0  755.92   26.40 
  -4   0   0  113.69    4.90 
  -4   0   0  121.29    5.30 
  -4   0   0  118.79    5.30 
  -4   0   0  116.89    5.30 
   4   0   0  118.19    4.50 
   4   0   0  114.39    5.10 
   4   0   0  114.49    5.60 
   4   0   0  116.49    4.90 
  -5   0   0  216.78    9.30 
  -5   0   0  207.68   11.80 
  -5   0   0  244.08    9.40 
  -5   0   0  225.78    9.30 
  -5   0   0  227.08    9.00 
  -5   0   0  236.48    9.60 
   5   0   0  241.38    9.30 
   5   0   0  227.88    8.40 
   5   0   0  224.58    8.60 
   5   0   0  208.18    8.90 
   5   0   0  238.38   10.10 
  -6   0   0   40.70    3.40 
  -6   0   0   39.50    2.90 
  -6   0   0   32.30    3.10 
  -6   0   0   34.10    2.40 
  -6   0   0   36.40    2.80 
  -6   0   0   36.40    2.70 
  -6   0   0   33.70    2.20 
  -6   0   0   38.00    3.20 
  -6   0   0   43.30    3.00 
   6   0   0   39.40    3.80 
   6   0   0   37.70    2.20 
   6   0   0   39.80    3.10 
   6   0   0   39.70    2.40 
   6   0   0   38.90    2.40 
   6   0   0   35.60    2.80 
   6   0   0   37.20    3.10 
   6   0   0   38.50    2.50 
  -7   0   0   71.09    4.30 
  -7   0   0   75.19    5.00 
  -7   0   0   75.39    4.40 
  -7   0   0   70.79    4.20 
  -7   0   0   65.09    4.50 
  -7   0   0   72.29    3.70 
   7   0   0   74.79    3.90 
   7   0   0   73.69    4.60 
   7   0   0   66.69    3.60 
   7   0   0   72.39    3.70 
   7   0   0   73.59    4.50 
   7   0   0   65.39    4.20 
   7   0   0   65.39    5.30 
  -8   0   0  111.79    5.60 
  -8   0   0  108.69    5.50 
   8   0   0   97.09    6.50 
   8   0   0  109.89    5.10 
   8   0   0  110.09    5.00 
  -9   0   0   47.70    2.90 
  -9   0   0   43.20    2.80 
   9   0   0   39.20    2.30 
   9   0   0   43.80    2.50 
   8  -1   0   86.09    4.90 
   8  -1   0   88.89    4.30 
   8  -1   0   81.49    4.10 
  -8   1   0   93.49    4.70 
  -8   1   0   91.89    4.70 
   7  -1   0   62.09    4.20 
   7  -1   0   70.09    3.80 
   7  -1   0   65.19    4.20 
   7  -1   0   65.79    3.50 
   7  -1   0   62.39    4.20 
  -7   1   0   72.49    4.20 
  -7   1   0   66.19    4.20 
  -7   1   0   66.89    3.90 
  -7   1   0   61.39    4.70 
   6  -1   0  115.79    5.00 
   6  -1   0  118.69    5.90 
   6  -1   0  110.79    5.80 
   6  -1   0  118.29    5.20 
   6  -1   0  106.59    5.60 
   6  -1   0  115.99    6.90 
  -6   1   0  117.19    6.30 
  -6   1   0  111.19    5.60 
  -6   1   0  104.79    4.80 
  -6   1   0  110.29    5.50 
  -6   1   0  119.59    5.70 
  -6   1   0  102.59    5.80 
  -6   1   0  108.49    5.40 
   5  -1   0  343.17   13.40 
   5  -1   0  378.36   13.70 
   5  -1   0  380.26   14.70 
   5  -1   0  354.96   12.90 
   5  -1   0  351.36   13.60 
   5  -1   0  359.06   12.90 
   5  -1   0  349.57   12.70 
  -5   1   0  328.17   13.30 
  -5   1   0  334.57   12.70 
  -5   1   0  360.46   13.30 
  -5   1   0  352.66   13.40 
  -5   1   0  347.57   13.30 
  -5   1   0  382.76   14.20 
  -5   1   0  332.37   13.70 
  -5   1   0  349.57   13.70 
   4  -1   0  570.24   20.50 
   4  -1   0  561.34   19.00 
   4  -1   0  546.75   19.60 
   4  -1   0  508.85   19.30 
  -4   1   0  537.05   19.40 
  -4   1   0  554.44   19.80 
  -4   1   0  571.44   20.10 
  -4   1   0  544.75   19.80 
   3  -1   0 2447.26   82.39 
   3  -1   0 2453.65   82.19 
   3  -1   0 2474.95   82.29 
   3  -1   0 2518.65   81.89 
   3  -1   0 2573.84   83.09 
  -3   1   0 2381.16   82.29 
  -3   1   0 2310.87   85.79 
  -3   1   0 2463.65   82.59 
  -3   1   0 2452.25   82.49 
  -3   1   0 2384.56   82.69 
   2  -1   0  122.89    5.20 
   2  -1   0  132.79    4.90 
   2  -1   0  129.49    4.60 
   2  -1   0  130.09    4.80 
   2  -1   0  124.59    4.80 
  -2   1   0  121.29    5.10 
  -2   1   0  123.09    4.90 
  -2   1   0  126.59    5.20 
  -2   1   0  132.29    5.00 
   1  -1   0  497.45   16.20 
   1  -1   0  484.35   16.10 
   1  -1   0  473.55   16.40 
   1  -1   0  505.25   16.30 
   1  -1   0  482.45   16.20 
   1  -1   0  449.76   16.50 
  -1   1   0  491.35   16.30 
  -1   1   0  451.85   16.30 
  -1   1   0  473.65   16.60 
  -1   1   0  472.45   16.40 
  -1  -1   0  303.67   10.80 
  -1  -1   0  304.27   10.50 
  -1  -1   0  317.17   11.10 
  -1  -1   0  299.67   10.70 
   1   1   0  300.77   10.70 
   1   1   0  303.17   10.50 
   1   1   0  311.67   10.70 
   1   1   0  308.17   11.10 
  -2  -1   0 2076.89   70.69 
  -2  -1   0 1926.41   67.29 
  -2  -1   0 1989.50   67.39 
  -2  -1   0 1876.21   67.49 
  -2  -1   0 2053.09   67.99 
   2   1   0 2102.79   67.49 
   2   1   0 1963.50   67.59 
   2   1   0 2077.99   68.29 
  -3  -1   0  480.45   17.20 
  -3  -1   0  485.35   17.90 
  -3  -1   0  529.35   19.40 
  -3  -1   0  539.25   18.00 
  -3  -1   0  490.95   17.70 
  -3  -1   0  506.15   17.90 
   3   1   0  539.15   17.80 
   3   1   0  530.35   17.40 
   3   1   0  494.35   17.80 
   3   1   0  518.35   18.30 
  -4  -1   0  283.27   10.80 
  -4  -1   0  300.97   11.10 
  -4  -1   0  286.07   12.90 
  -4  -1   0  280.67   11.00 
  -4  -1   0  291.67   11.10 
   4   1   0  292.87   10.90 
   4   1   0  294.07   10.90 
   4   1   0  309.87   10.40 
   4   1   0  302.77   11.60 
  -5  -1   0  372.56   13.40 
  -5  -1   0  372.06   13.80 
  -5  -1   0  369.06   13.80 
  -5  -1   0  357.16   13.80 
  -5  -1   0  348.17   16.20 
   5   1   0  368.16   13.50 
   5   1   0  367.26   14.40 
   5   1   0  348.67   13.40 
   5   1   0  327.37   12.50 
   5   1   0  363.16   12.70 
  -6  -1   0   76.59    3.50 
  -6  -1   0   72.09    3.70 
  -6  -1   0   75.79    4.10 
  -6  -1   0   80.29    4.60 
  -6  -1   0   77.99    4.60 
  -6  -1   0   74.49    4.60 
  -6  -1   0   75.39    4.10 
  -6  -1   0   76.99    4.20 
   6   1   0   83.99    4.50 
   6   1   0   74.89    3.80 
   6   1   0   76.79    3.70 
   6   1   0   82.29    5.30 
   6   1   0   80.89    3.60 
   6   1   0   72.69    3.20 
   6   1   0   74.59    3.50 
  -7  -1   0  143.59    6.40 
  -7  -1   0  154.18    6.90 
  -7  -1   0  145.59    6.80 
  -7  -1   0  140.49    7.30 
  -7  -1   0  143.69    6.80 
   7   1   0  143.29    6.20 
   7   1   0  152.98    7.30 
   7   1   0  151.58    6.30 
   7   1   0  142.19    8.20 
   7   1   0  155.68    6.40 
  -8  -1   0    8.60    1.80 
  -8  -1   0   12.50    1.70 
  -8  -1   0   10.30    1.80 
  -8  -1   0   10.00    2.00 
   8   1   0   13.30    1.70 
   8   1   0   12.70    2.40 
   8   1   0   10.50    1.70 
   8   1   0   11.60    1.60 
  -9  -1   0   51.69    3.30 
  -9  -1   0   50.09    2.90 
  -9  -1   0   54.89    3.40 
  -9  -1   0   47.90    2.90 
   9   1   0   52.69    2.90 
   9   1   0   53.79    3.00 
   8  -2   0   87.89    3.90 
   8  -2   0   87.49    4.50 
   8  -2   0   81.69    3.70 
  -8   2   0   85.49    4.20 
  -8   2   0   90.39    4.30 
  -8   2   0   75.09    3.90 
   7  -2   0   48.20    3.70 
   7  -2   0   50.49    3.00 
   7  -2   0   49.90    3.70 
  -7   2   0   55.39    3.60 
  -7   2   0   42.60    3.90 
  -7   2   0   51.19    3.40 
  -7   2   0   53.09    3.50 
   6  -2   0  115.09    6.10 
   6  -2   0  126.09    5.60 
   6  -2   0  114.89    6.00 
   6  -2   0  119.89    5.40 
   6  -2   0  115.49    6.10 
  -6   2   0  117.99    5.90 
  -6   2   0  126.79    6.80 
  -6   2   0  122.39    5.90 
  -6   2   0  124.99    6.00 
  -6   2   0  113.39    5.10 
   5  -2   0  237.28    9.20 
   5  -2   0  243.88   10.10 
   5  -2   0  250.47    9.50 
   5  -2   0  252.87   10.40 
   5  -2   0  246.88   11.10 
   5  -2   0  260.87    9.50 
   5  -2   0  250.17   10.10 
  -5   2   0  247.28   10.00 
  -5   2   0  259.47   10.90 
  -5   2   0  236.28   10.00 
  -5   2   0  241.28   10.00 
  -5   2   0  245.08    9.30 
   4  -2   0  813.32   26.80 
   4  -2   0  749.03   26.40 
   4  -2   0  732.03   27.40 
   4  -2   0  768.82   27.20 
   4  -2   0  768.22   28.00 
   4  -2   0  759.92   26.70 
  -4   2   0  753.32   27.30 
  -4   2   0  837.12   27.60 
  -4   2   0  754.52   27.20 
  -4   2   0  752.32   27.30 
  -4   2   0  809.02   27.90 
  -4   2   0  748.43   26.90 
   3  -2   0  319.17   11.60 
   3  -2   0  309.17   12.10 
   3  -2   0  327.07   12.40 
   3  -2   0  324.37   11.20 
   3  -2   0  319.57   11.70 
   3  -2   0  327.37   11.90 
  -3   2   0  323.57   11.90 
  -3   2   0  315.47   15.70 
  -3   2   0  313.37   12.30 
  -3   2   0  304.27   11.50 
  -3   2   0  318.67   11.80 
  -3   2   0  326.37   12.30 
   2  -2   0  962.90   34.70 
   2  -2   0 1070.09   34.00 
   2  -2   0  932.41   34.20 
   2  -2   0 1026.20   33.90 
   2  -2   0 1016.80   34.50 
   2  -2   0  990.30   34.70 
   2  -2   0 1018.70   34.10 
   2  -2   0 1021.60   34.30 
  -2   2   0 1049.09   34.30 
  -2   2   0  947.01   34.10 
  -2   2   0 1000.30   34.70 
  -2   2   0 1000.60   38.10 
  -2   2   0  983.50   34.30 
  -2   2   0 1019.50   34.90 
  -2   2   0 1022.30   34.40 
   1  -2   0 1323.17   44.10 
   1  -2   0 1234.08   44.10 
   1  -2   0 1323.17   43.60 
   1  -2   0 1336.67   43.80 
   1  -2   0 1370.96   43.80 
   1  -2   0 1254.57   43.70 
  -1   2   0 1316.67   44.40 
  -1   2   0 1251.37   44.20 
  -1   2   0 1345.17   44.00 
  -1   2   0 1318.37   44.00 
  -1   2   0 1257.57   43.90 
   0  -2   0 6072.59  207.38 
   0  -2   0 5827.82  205.78 
   0  -2   0 5934.61  205.08 
   0  -2   0 6268.07  206.08 
   0   2   0 6058.69  208.78 
   0   2   0 6647.33  235.38 
   0   2   0 6224.78  206.68 
  -1  -2   0 6838.82  227.28 
  -1  -2   0 6389.06  227.98 
   1   2   0 7097.09  228.48 
   1   2   0 6582.74  230.78 
   1   2   0 7067.49  228.78 
   1   2   0 6741.33  230.28 
  -2  -2   0 5003.80  165.78 
  -2  -2   0 4996.00  170.08 
  -2  -2   0 4698.93  164.68 
  -2  -2   0 4847.12  163.78 
  -2  -2   0 4845.72  165.08 
   2   2   0 4870.61  163.68 
   2   2   0 4916.31  164.68 
   2   2   0 4748.12  165.58 
   2   2   0 5163.68  164.08 
   2   2   0 4729.53  166.68 
  -3  -2   0  738.93   25.40 
  -3  -2   0  762.02   26.20 
  -3  -2   0  704.43   25.50 
  -3  -2   0  739.53   25.90 
  -3  -2   0  790.02   26.30 
  -3  -2   0  791.32   27.40 
   3   2   0  787.92   26.10 
   3   2   0  751.82   25.80 
   3   2   0  727.03   26.00 
   3   2   0  764.52   26.40 
   3   2   0  782.52   25.60 
  -4  -2   0   21.10    1.70 
  -4  -2   0   22.40    1.90 
  -4  -2   0   19.20    2.60 
  -4  -2   0   23.40    2.00 
   4   2   0   23.30    1.30 
   4   2   0   19.70    1.50 
   4   2   0   22.50    1.70 
   4   2   0   23.20    2.20 
   4   2   0   21.60    1.70 
  -5  -2   0   42.60    2.60 
  -5  -2   0   43.10    2.90 
  -5  -2   0   38.10    2.80 
  -5  -2   0   40.10    4.10 
   5   2   0   39.00    2.60 
   5   2   0   37.60    3.10 
   5   2   0   35.70    1.90 
   5   2   0   39.10    2.60 
   5   2   0   41.90    2.10 
  -6  -2   0   68.29    4.00 
  -6  -2   0   77.19    4.10 
  -6  -2   0   70.59    3.90 
  -6  -2   0   68.39    3.30 
  -6  -2   0   72.89    4.40 
  -6  -2   0   76.29    3.70 
  -6  -2   0   78.39    4.50 
   6   2   0   70.89    3.40 
   6   2   0   68.79    3.10 
   6   2   0   72.99    3.50 
   6   2   0   76.09    5.10 
   6   2   0   72.09    3.50 
   6   2   0   80.79    4.40 
   6   2   0   74.59    3.40 
  -7  -2   0  179.88    8.50 
  -7  -2   0  198.08    7.70 
  -7  -2   0  174.18    7.90 
  -7  -2   0  186.68    8.10 
  -7  -2   0  185.78    8.10 
   7   2   0  187.58    8.40 
   7   2   0  176.48    9.30 
   7   2   0  180.78    7.30 
   7   2   0  185.18    7.50 
   7   2   0  176.78    7.40 
  -8  -2   0  249.28   10.20 
  -8  -2   0  240.38    9.70 
  -8  -2   0  238.48   10.00 
  -8  -2   0  227.88   10.00 
   8   2   0  241.28   10.50 
   8   2   0  249.28    9.60 
   8   2   0  239.78    9.50 
   8   2   0  251.17    9.50 
  -9  -2   0   30.60    2.30 
  -9  -2   0   31.00    2.80 
  -9  -2   0   28.50    2.70 
   9   2   0   27.60    2.30 
   9   2   0   28.00    2.20 
   9   2   0   28.00    2.20 
 -10  -2   0   40.60    2.80 
 -10  -2   0   34.40    2.30 
  10   2   0   33.80    2.40 
  10   2   0   34.20    2.30 
   7  -3   0  277.57   10.40 
   7  -3   0  264.37   10.30 
   7  -3   0  286.57   11.20 
   7  -3   0  267.57   11.10 
  -7   3   0  288.17   10.90 
  -7   3   0  285.97   10.90 
  -7   3   0  272.27   10.60 
   6  -3   0  127.09    6.70 
   6  -3   0  137.09    5.90 
   6  -3   0  128.59    6.60 
  -6   3   0  136.09    6.30 
  -6   3   0  140.89    6.50 
  -6   3   0  138.29    6.50 
  -6   3   0  131.59    7.20 
   5  -3   0   15.60    1.80 
   5  -3   0   13.20    1.60 
   5  -3   0   10.20    1.90 
   5  -3   0   11.40    2.10 
  -5   3   0   19.40    2.40 
  -5   3   0   13.80    1.90 
  -5   3   0   14.70    1.60 
  -5   3   0   15.60    2.20 
  -5   3   0   16.60    2.80 
   4  -3   0  777.72   27.20 
   4  -3   0  773.12   27.20 
   4  -3   0  790.82   28.10 
   4  -3   0  780.22   27.90 
  -4   3   0  787.52   27.00 
  -4   3   0  760.72   27.50 
  -4   3   0  755.52   27.00 
  -4   3   0  747.33   27.60 
  -4   3   0  788.82   27.80 
  -4   3   0  827.72   28.70 
   3  -3   0  367.16   14.50 
   3  -3   0  367.76   14.30 
   3  -3   0  361.86   13.70 
   3  -3   0  374.46   13.10 
   3  -3   0  381.36   13.80 
  -3   3   0  378.06   19.10 
  -3   3   0  392.96   14.60 
  -3   3   0  373.66   15.70 
  -3   3   0  373.06   14.70 
   2  -3   0   66.39    2.70 
   2  -3   0   66.79    3.50 
   2  -3   0   67.59    3.80 
   2  -3   0   69.29    3.60 
   2  -3   0   72.59    3.40 
   2  -3   0   61.49    3.10 
   2  -3   0   70.99    3.00 
  -2   3   0   67.99    3.30 
  -2   3   0   64.59    3.10 
  -2   3   0   71.09    3.80 
  -2   3   0   76.89    7.00 
  -2   3   0   72.09    4.00 
  -2   3   0   70.99    3.40 
  -2   3   0   68.19    3.30 
   1  -3   0 2449.45   77.99 
   1  -3   0 2056.69   77.79 
   1  -3   0 2232.18   77.39 
   1  -3   0 2305.07   78.39 
   1  -3   0 2453.05   77.59 
   1  -3   0 2196.88   77.19 
  -1   3   0 2138.79   77.69 
  -1   3   0 2250.67   77.79 
  -1   3   0 2641.04   83.89 
  -1   3   0 2236.88   78.19 
  -1   3   0 2381.06   78.59 
  -1   3   0 2399.06   77.89 
   0  -3   0  102.89    4.60 
   0  -3   0  115.39    4.20 
   0  -3   0  116.19    5.20 
   0  -3   0  127.29    4.90 
   0  -3   0  128.69    4.50 
   0   3   0  123.99    5.00 
   0   3   0  121.39    4.40 
   0   3   0  135.49    8.40 
   0   3   0  122.09    5.30 
   0   3   0  120.79    4.70 
   0   3   0  130.19    4.90 
  -1  -3   0 7326.57  240.18 
  -1  -3   0 7146.89  241.68 
   1   3   0 7081.09  240.18 
   1   3   0 7027.60  241.28 
  -2  -3   0 1412.56   48.90 
  -2  -3   0 1443.66   49.80 
  -2  -3   0 1519.85   48.70 
   2   3   0 1476.85   49.00 
   2   3   0 1521.95   49.10 
   2   3   0 1440.36   49.50 
   2   3   0 1341.77   49.00 
  -3  -3   0 2112.89   70.69 
  -3  -3   0 2090.79   71.69 
  -3  -3   0 2022.10   70.39 
  -3  -3   0 2085.19   69.99 
  -3  -3   0 1992.40   70.19 
   3   3   0 2122.19   69.99 
   3   3   0 2016.80   70.79 
   3   3   0 2177.48   70.69 
   3   3   0 2113.19   71.09 
   3   3   0 2192.98   70.49 
  -4  -3   0    3.80    1.10 
  -4  -3   0    3.50    1.40 
  -4  -3   0    3.90    0.90 
  -4  -3   0    2.90    1.00 
   4   3   0    4.20    1.20 
   4   3   0    3.90    0.80 
   4   3   0    5.70    1.10 
   4   3   0    2.90    1.20 
   4   3   0    4.10    1.10 
   4   3   0    2.70    0.60 
  -5  -3   0 1854.21   62.59 
  -5  -3   0 1829.82   62.09 
  -5  -3   0 1823.82   64.79 
  -5  -3   0 1870.51   62.49 
   5   3   0 1861.11   62.19 
   5   3   0 1735.43   62.59 
   5   3   0 1732.13   61.69 
   5   3   0 1773.72   61.29 
   5   3   0 1921.41   63.09 
   5   3   0 1823.52   61.39 
   5   3   0 1826.52   62.29 
  -6  -3   0  420.46   16.30 
  -6  -3   0  434.96   16.10 
  -6  -3   0  421.46   17.10 
  -6  -3   0  452.45   16.60 
  -6  -3   0  477.75   16.70 
  -6  -3   0  436.86   16.10 
  -6  -3   0  457.05   17.10 
   6   3   0  467.85   17.80 
   6   3   0  439.26   15.70 
   6   3   0  411.86   15.40 
   6   3   0  458.65   15.90 
   6   3   0  445.96   16.00 
   6   3   0  469.55   16.80 
  -7  -3   0  331.67   13.10 
  -7  -3   0  326.07   12.80 
  -7  -3   0  346.27   13.20 
  -7  -3   0  309.77   12.40 
  -7  -3   0  332.37   13.70 
  -7  -3   0  332.67   12.70 
   7   3   0  333.17   14.60 
   7   3   0  332.47   12.40 
   7   3   0  336.67   12.60 
   7   3   0  359.56   13.60 
   7   3   0  339.17   12.50 
  -8  -3   0  478.65   18.20 
  -8  -3   0  521.25   18.30 
  -8  -3   0  498.45   17.80 
  -8  -3   0  444.36   17.70 
   8   3   0  484.95   17.40 
   8   3   0  469.15   17.50 
   8   3   0  461.05   18.40 
   8   3   0  481.55   17.50 
  -9  -3   0   29.70    2.90 
  -9  -3   0   29.00    2.50 
  -9  -3   0   32.40    2.50 
   9   3   0   31.90    2.30 
   9   3   0   30.30    2.30 
   9   3   0   31.20    2.50 
 -10  -3   0   17.20    1.60 
 -10  -3   0   14.80    1.70 
 -10  -3   0   20.00    1.80 
 -10  -3   0   13.20    1.80 
  10   3   0   17.10    1.50 
  10   3   0   18.70    1.50 
  10   3   0   17.70    1.60 
  -7   4   0  163.58    6.70 
  -7   4   0  159.88    6.70 
  -7   4   0  187.18    7.60 
   6  -4   0  118.69    5.90 
   6  -4   0  102.49    4.80 
   6  -4   0  109.59    5.70 
  -6   4   0  114.09    5.50 
  -6   4   0  116.49    5.50 
  -6   4   0   98.69    5.80 
   5  -4   0  567.14   20.90 
   5  -4   0  536.15   19.70 
   5  -4   0  558.14   19.70 
   5  -4   0  538.95   20.50 
  -5   4   0  535.35   19.90 
  -5   4   0  550.64   20.30 
  -5   4   0  562.44   20.40 
  -5   4   0  530.05   19.40 
  -5   4   0  559.64   21.50 
   4  -4   0 1137.69   39.60 
   4  -4   0 1111.99   39.20 
   4  -4   0 1100.69   38.30 
   4  -4   0 1101.79   38.40 
  -4   4   0 1156.08   39.20 
  -4   4   0 1154.58   40.20 
  -4   4   0 1052.79   38.90 
  -4   4   0 1070.79   38.30 
  -4   4   0 1111.69   38.20 
   3  -4   0   58.79    3.10 
   3  -4   0   57.69    3.10 
   3  -4   0   55.99    3.30 
   3  -4   0   61.59    3.60 
   3  -4   0   55.89    3.80 
   3  -4   0   58.69    4.10 
   3  -4   0   59.29    3.80 
  -3   4   0   58.49    3.00 
  -3   4   0   60.39    3.60 
  -3   4   0   60.69    4.20 
  -3   4   0   60.19    4.30 
  -3   4   0   56.99    7.70 
  -3   4   0   58.09    3.20 
  -3   4   0   62.39    3.60 
   2  -4   0  234.28   11.00 
   2  -4   0  287.97   10.70 
   2  -4   0  279.77   11.40 
   2  -4   0  267.67   11.00 
   2  -4   0  273.47   10.00 
  -2   4   0  261.17   10.40 
  -2   4   0  286.67   11.20 
  -2   4   0  278.57   11.50 
  -2   4   0  292.17   16.40 
   1  -4   0  101.59    4.60 
   1  -4   0  101.59    4.10 
   1  -4   0  103.59    5.20 
  -1   4   0  100.69    4.50 
  -1   4   0   99.19    5.20 
  -1   4   0   86.09    4.40 
  -1   4   0  100.39    4.90 
  -1   4   0  101.99    9.00 
   0  -4   0  909.41   30.20 
   0  -4   0  848.32   31.20 
   0  -4   0  896.11   30.70 
   0   4   0  905.51   30.60 
   0   4   0  883.51   31.40 
   0   4   0  879.01   30.90 
   0   4   0  903.81   36.70 
   0   4   0  866.31   30.40 
  -1  -4   0  986.20   35.20 
  -1  -4   0 1020.70   34.30 
  -1  -4   0 1031.70   34.80 
   1   4   0  984.80   34.80 
   1   4   0 1024.10   34.70 
   1   4   0 1022.90   35.50 
  -2  -4   0 1099.19   36.40 
  -2  -4   0 1078.39   36.80 
  -2  -4   0 1034.10   37.20 
   2   4   0 1094.09   36.80 
   2   4   0 1075.99   37.50 
  -3  -4   0  401.16   14.80 
  -3  -4   0  404.96   15.20 
  -3  -4   0  436.66   14.50 
  -3  -4   0  421.76   16.00 
  -3  -4   0  417.36   14.90 
   3   4   0  391.46   15.00 
   3   4   0  433.86   15.10 
   3   4   0  439.56   15.00 
   3   4   0  435.86   15.80 
  -4  -4   0  371.76   13.10 
  -4  -4   0  381.26   13.50 
  -4  -4   0  362.46   14.70 
   4   4   0  358.16   12.50 
   4   4   0  344.77   12.60 
   4   4   0  375.46   13.10 
   4   4   0  333.57   13.00 
   4   4   0  347.37   13.50 
   4   4   0  367.96   13.90 
   4   4   0  372.96   13.40 
  -5  -4   0  103.39    4.60 
  -5  -4   0  100.49    4.90 
   5   4   0   90.19    4.40 
   5   4   0   95.19    4.70 
   5   4   0   91.29    3.80 
   5   4   0   96.39    5.10 
   5   4   0   96.59    3.90 
   5   4   0   94.89    5.00 
   5   4   0   94.69    4.30 
  -6  -4   0   20.60    2.00 
  -6  -4   0   22.30    2.20 
  -6  -4   0   17.60    2.00 
  -6  -4   0   22.00    2.20 
  -6  -4   0   22.90    2.50 
  -6  -4   0   21.60    1.90 
   6   4   0   22.50    2.80 
   6   4   0   22.30    1.60 
   6   4   0   23.00    2.30 
   6   4   0   23.60    1.90 
   6   4   0   18.30    1.70 
   6   4   0   20.70    1.60 
  -7  -4   0  930.11   33.60 
  -7  -4   0  957.10   34.90 
  -7  -4   0  966.10   33.80 
  -7  -4   0  991.80   34.30 
  -7  -4   0 1004.30   34.30 
   7   4   0  936.71   33.50 
   7   4   0  958.80   33.40 
   7   4   0  957.70   34.40 
   7   4   0  941.81   35.60 
   7   4   0 1013.70   33.70 
  -8  -4   0  178.58    8.20 
  -8  -4   0  174.48    7.50 
  -8  -4   0  177.88    7.60 
  -8  -4   0  187.18    8.30 
   8   4   0  177.68    8.30 
   8   4   0  183.08    7.40 
   8   4   0  189.58    7.40 
   8   4   0  175.18    7.50 
  -9  -4   0  385.56   14.50 
  -9  -4   0  364.46   14.00 
   9   4   0  391.16   13.80 
   9   4   0  385.66   14.00 
   9   4   0  352.06   13.70 
 -10  -4   0  141.69    5.60 
 -10  -4   0  136.29    5.90 
  10   4   0  127.79    5.40 
  10   4   0  132.59    5.50 
  10   4   0  139.69    5.50 
   6  -5   0   53.19    3.20 
   6  -5   0   47.90    3.10 
  -6   5   0   50.09    3.00 
  -6   5   0   49.60    3.00 
   5  -5   0  472.65   17.70 
   5  -5   0  450.75   16.40 
   5  -5   0  416.76   16.40 
   5  -5   0  464.05   17.40 
  -5   5   0  475.65   17.20 
  -5   5   0  482.45   17.30 
   4  -5   0  153.88    6.70 
   4  -5   0  163.78    8.00 
   4  -5   0  159.78    6.70 
   4  -5   0  163.98    7.60 
  -4   5   0  169.58    7.50 
  -4   5   0  158.08    7.30 
  -4   5   0  156.48    6.50 
  -4   5   0  163.28    6.80 
  -4   5   0  165.08    8.40 
   3  -5   0 1135.69   38.90 
   3  -5   0 1098.29   37.70 
   3  -5   0 1069.79   38.50 
   3  -5   0 1034.50   38.30 
   3  -5   0 1111.49   39.60 
   3  -5   0 1050.29   37.80 
   3  -5   0 1076.19   37.50 
  -3   5   0 1139.49   39.50 
  -3   5   0 1115.69   38.30 
  -3   5   0 1097.89   37.50 
  -3   5   0 1111.89   37.70 
  -3   5   0 1066.49   46.70 
  -3   5   0 1044.60   38.20 
   2  -5   0   15.90    2.20 
   2  -5   0   18.30    2.40 
   2  -5   0   15.90    1.80 
   2  -5   0   14.70    2.10 
   2  -5   0   13.60    1.60 
   2  -5   0   17.50    2.00 
   2  -5   0   17.90    2.90 
  -2   5   0   15.90    2.00 
  -2   5   0   25.20    8.80 
  -2   5   0   16.90    1.50 
  -2   5   0   16.70    1.80 
  -2   5   0   16.10    2.50 
  -2   5   0   19.60    3.20 
  -2   5   0   14.20    1.80 
   1  -5   0  466.35   16.00 
   1  -5   0  435.06   16.80 
   1  -5   0  444.56   16.30 
   1  -5   0  435.46   16.00 
   1  -5   0  480.25   17.70 
   1  -5   0  440.96   16.60 
   1  -5   0  477.55   16.80 
  -1   5   0  443.96   15.90 
  -1   5   0  462.55   17.70 
  -1   5   0  446.56   16.10 
  -1   5   0  442.36   16.50 
  -1   5   0  381.76   23.00 
  -1   5   0  466.95   17.20 
  -1   5   0  436.46   16.30 
   0  -5   0    2.60    0.70 
   0  -5   0    2.90    1.10 
   0  -5   0    2.40    1.30 
   0   5   0    2.70    1.50 
   0   5   0    0.20    5.70 
   0   5   0    2.50    1.00 
   0   5   0    3.40    1.30 
  -1  -5   0  323.47   12.90 
  -1  -5   0  326.17   12.30 
  -1  -5   0  324.37   11.70 
   1   5   0  320.57   12.40 
   1   5   0  317.97   18.30 
   1   5   0  342.27   13.30 
   1   5   0  328.67   12.20 
  -2  -5   0  912.41   31.70 
  -2  -5   0  896.11   30.50 
  -2  -5   0  911.91   31.10 
   2   5   0  907.51   32.10 
   2   5   0  840.02   31.10 
   2   5   0  850.81   30.90 
   2   5   0  898.31   31.10 
   2   5   0  941.11   38.10 
  -3  -5   0  142.49    5.90 
  -3  -5   0  145.49    5.40 
  -3  -5   0  145.19    6.40 
   3   5   0  134.09    5.30 
   3   5   0  147.99    6.90 
   3   5   0  143.59    6.00 
  -4  -5   0  256.67    9.70 
   4   5   0  261.67   10.80 
   4   5   0  259.97    9.80 
   4   5   0  241.68    9.90 
   4   5   0  249.68    9.10 
  -5  -5   0  486.85   17.50 
  -5  -5   0  482.75   17.70 
  -5  -5   0  466.05   17.20 
  -5  -5   0  493.25   17.30 
   5   5   0  476.95   17.30 
   5   5   0  476.35   18.30 
   5   5   0  460.85   16.70 
   5   5   0  491.95   16.80 
   5   5   0  465.75   16.40 
   5   5   0  445.16   16.50 
   5   5   0  481.25   17.00 
  -6  -5   0  412.36   15.70 
  -6  -5   0  432.56   16.40 
  -6  -5   0  431.96   16.00 
  -6  -5   0  407.06   15.60 
  -6  -5   0  420.96   15.50 
  -6  -5   0  436.86   15.90 
   6   5   0  429.16   15.80 
   6   5   0  427.16   15.40 
   6   5   0  420.16   15.40 
   6   5   0  415.66   15.00 
   6   5   0  434.56   15.20 
   6   5   0  413.16   14.70 
  -7  -5   0  398.26   15.40 
  -7  -5   0  409.56   15.20 
  -7  -5   0  400.16   16.20 
  -7  -5   0  425.06   15.80 
  -7  -5   0  416.56   15.30 
  -7  -5   0  401.96   15.70 
   7   5   0  407.76   15.20 
   7   5   0  413.16   15.10 
   7   5   0  417.86   15.00 
   7   5   0  408.46   15.70 
  -8  -5   0   59.89    3.90 
  -8  -5   0   52.49    3.40 
  -8  -5   0   59.39    3.50 
  -8  -5   0   59.39    3.90 
   8   5   0   48.40    3.10 
   8   5   0   49.80    3.80 
   8   5   0   56.89    3.40 
   8   5   0   56.69    3.40 
   8   5   0   56.39    3.20 
  -9  -5   0   20.00    2.00 
  -9  -5   0   17.20    2.00 
  -9  -5   0   19.60    2.40 
   9   5   0   20.60    2.10 
   9   5   0   20.30    1.90 
   9   5   0   19.60    1.90 
 -10  -5   0   53.29    2.90 
 -10  -5   0   55.49    3.30 
  10   5   0   55.59    2.90 
  10   5   0   54.09    2.80 
   5  -6   0    2.30    1.20 
   5  -6   0    4.90    1.40 
  -5   6   0    2.80    1.10 
  -5   6   0    1.60    0.90 
   4  -6   0  276.37   11.40 
   4  -6   0  243.48   10.10 
   4  -6   0  273.07   11.20 
  -4   6   0  263.47   10.10 
  -4   6   0  270.47   10.30 
  -4   6   0  292.47   11.00 
  -4   6   0  287.87   10.90 
   3  -6   0  700.73   25.20 
   3  -6   0  641.94   24.00 
   3  -6   0  650.13   23.80 
   3  -6   0  674.23   24.80 
  -3   6   0  646.04   24.40 
  -3   6   0  679.93   25.70 
  -3   6   0  710.83   24.60 
  -3   6   0  664.63   23.70 
  -3   6   0  711.83   24.10 
  -3   6   0  672.93   25.90 
   2  -6   0  197.18    8.70 
   2  -6   0  174.38    7.40 
   2  -6   0  172.28    8.10 
   2  -6   0  174.38    7.40 
   2  -6   0  183.78    9.30 
   2  -6   0  172.58    8.20 
   2  -6   0  171.38    7.60 
  -2   6   0  180.08    7.90 
  -2   6   0  182.28   15.00 
  -2   6   0  180.58    7.90 
  -2   6   0  182.58    7.30 
  -2   6   0  192.28    9.00 
  -2   6   0  183.88    9.00 
  -2   6   0  180.98    9.30 
  -2   6   0  184.88    7.60 
   1  -6   0  200.78    8.80 
   1  -6   0  209.48    9.90 
   1  -6   0  202.98    8.00 
   1  -6   0  194.88    8.10 
   1  -6   0  200.98    8.30 
   1  -6   0  204.58    9.00 
   1  -6   0  203.78    8.90 
  -1   6   0  200.58    8.30 
  -1   6   0  218.18    9.40 
  -1   6   0  209.18    8.20 
  -1   6   0  203.08    9.90 
  -1   6   0  196.48    8.40 
  -1   6   0  204.88    7.90 
  -1   6   0  188.48    8.40 
  -1   6   0  182.68    8.60 
   0  -6   0  270.37   10.20 
   0  -6   0  269.37   11.00 
   0  -6   0  287.87   12.10 
   0  -6   0  260.17   10.70 
   0  -6   0  258.47   10.50 
   0  -6   0  286.47   11.10 
   0  -6   0  262.57   11.00 
   0  -6   0  267.87   10.30 
   0  -6   0  273.67   10.50 
   0   6   0  274.27   11.30 
   0   6   0  267.37   10.90 
   0   6   0  288.97   10.50 
   0   6   0  268.07   10.90 
   0   6   0  291.47   11.50 
   0   6   0  273.77   10.20 
   0   6   0  259.57   18.60 
   0   6   0  282.67   12.20 
   0   6   0  277.17   10.70 
  -1  -6   0   70.59    3.80 
  -1  -6   0   58.79    3.60 
  -1  -6   0   58.69    3.10 
  -1  -6   0   62.49    3.40 
  -1  -6   0   69.89    3.80 
  -1  -6   0   62.19    3.10 
  -1  -6   0   59.39    3.50 
  -1  -6   0   59.89    3.30 
  -1  -6   0   64.49    4.30 
   1   6   0   67.09    9.50 
   1   6   0   66.19    3.90 
   1   6   0   59.79    3.20 
   1   6   0   60.39    3.00 
   1   6   0   61.59    3.70 
   1   6   0   66.69    4.70 
   1   6   0   60.79    3.60 
  -2  -6   0  524.75   19.30 
  -2  -6   0  514.85   18.40 
  -2  -6   0  475.05   18.30 
  -2  -6   0  513.55   18.70 
  -2  -6   0  482.25   18.00 
  -2  -6   0  470.35   17.90 
  -2  -6   0  503.45   17.70 
   2   6   0  502.75   18.40 
   2   6   0  489.65   17.60 
   2   6   0  493.35   17.60 
   2   6   0  540.75   19.80 
   2   6   0  516.85   18.40 
   2   6   0  495.65   18.60 
  -3  -6   0  131.69    5.70 
  -3  -6   0  137.59    6.70 
  -3  -6   0  139.59    6.10 
  -3  -6   0  135.79    5.40 
  -3  -6   0  128.69    6.00 
  -3  -6   0  135.19    5.80 
  -3  -6   0  134.19    6.10 
   3   6   0  146.39    7.20 
   3   6   0  138.19    5.50 
   3   6   0  137.49    6.20 
   3   6   0  130.09    6.00 
   3   6   0  139.29    5.50 
   3   6   0  141.09    6.10 
  -4  -6   0  250.87    9.90 
  -4  -6   0  250.77   10.30 
  -4  -6   0  259.47   10.00 
  -4  -6   0  255.97    9.90 
  -4  -6   0  252.07   10.20 
  -4  -6   0  263.37   10.30 
   4   6   0  261.77   10.30 
   4   6   0  259.37    9.90 
   4   6   0  276.37   11.50 
   4   6   0  256.07    9.20 
   4   6   0  267.07    9.60 
   4   6   0  252.57   10.20 
   4   6   0  263.07    9.60 
  -5  -6   0  152.78    6.70 
  -5  -6   0  153.98    6.50 
  -5  -6   0  154.08    6.70 
  -5  -6   0  159.78    6.60 
  -5  -6   0  157.88    7.00 
  -5  -6   0  155.68    6.90 
   5   6   0  152.08    6.70 
   5   6   0  148.79    6.20 
   5   6   0  156.58    6.20 
   5   6   0  156.38    6.60 
   5   6   0  166.38    8.00 
   5   6   0  153.08    5.80 
   5   6   0  153.28    6.80 
  -6  -6   0  285.17   11.10 
  -6  -6   0  263.17   10.50 
  -6  -6   0  291.67   10.90 
  -6  -6   0  264.37   11.00 
  -6  -6   0  283.77   11.30 
  -6  -6   0  273.97   10.60 
   6   6   0  270.17    9.90 
   6   6   0  282.07   10.60 
   6   6   0  271.07   10.30 
   6   6   0  279.87   10.70 
   6   6   0  279.47   10.40 
   6   6   0  268.07   12.10 
  -7  -6   0   44.30    2.90 
  -7  -6   0   45.00    3.30 
  -7  -6   0   43.80    3.30 
  -7  -6   0   46.20    3.30 
  -7  -6   0   49.80    3.60 
   7   6   0   41.00    2.50 
   7   6   0   45.40    3.00 
   7   6   0   46.10    3.00 
   7   6   0   52.09    2.80 
  -8  -6   0   30.70    3.10 
  -8  -6   0   34.20    2.50 
  -8  -6   0   34.00    2.70 
  -8  -6   0   29.60    2.60 
  -8  -6   0   28.20    2.80 
   8   6   0   32.20    2.60 
   8   6   0   30.90    2.50 
   8   6   0   32.80    2.30 
  -9  -6   0  217.18    9.00 
  -9  -6   0  207.78    8.50 
  -9  -6   0  218.58    8.60 
   9   6   0  207.68    8.50 
   9   6   0  215.18    8.30 
 -10  -6   0   44.20    2.50 
 -10  -6   0   45.20    2.80 
  10   6   0   42.40    2.40 
  10   6   0   39.20    2.30 
   4  -7   0   77.89    4.20 
   4  -7   0   75.99    4.10 
  -4   7   0   71.99    3.40 
  -4   7   0   76.19    3.70 
  -4   7   0   77.09    3.80 
   3  -7   0  105.89    5.40 
   3  -7   0  109.29    5.70 
  -3   7   0   96.99    5.00 
  -3   7   0  106.59    4.70 
  -3   7   0   96.49    4.90 
  -3   7   0   96.49    4.30 
   2  -7   0   89.89    5.30 
   2  -7   0   86.39    5.90 
   2  -7   0   95.09    5.30 
   2  -7   0   84.19    4.50 
   2  -7   0   95.49    5.20 
  -2   7   0   92.09    4.50 
  -2   7   0   85.89    4.10 
  -2   7   0   74.99    5.30 
  -2   7   0   81.69   10.10 
  -2   7   0   80.89    4.60 
  -2   7   0   85.29    4.60 
  -2   7   0   88.29    5.60 
   1  -7   0  635.44   23.30 
   1  -7   0  678.03   25.70 
   1  -7   0  654.23   24.80 
   1  -7   0  671.93   24.50 
   1  -7   0  675.73   24.20 
   1  -7   0  648.64   23.50 
   1  -7   0  613.44   23.10 
  -1   7   0  666.23   23.80 
  -1   7   0  637.24   23.70 
  -1   7   0  668.53   23.40 
  -1   7   0  625.74   24.60 
  -1   7   0  672.23   23.10 
  -1   7   0  666.63   24.80 
  -1   7   0  635.74   33.40 
   0  -7   0   97.59    6.20 
   0  -7   0   93.49    4.60 
   0  -7   0   86.59    4.80 
   0  -7   0   90.89    5.20 
   0  -7   0   87.99    4.30 
   0  -7   0   84.69    5.10 
   0  -7   0   93.99    4.80 
   0  -7   0   90.69    5.20 
   0   7   0   88.19    4.90 
   0   7   0   91.89    4.80 
   0   7   0   99.49    4.40 
   0   7   0   94.19    5.60 
   0   7   0   98.09    4.70 
   0   7   0   84.49    6.00 
  -1  -7   0  764.82   27.70 
  -1  -7   0  742.23   25.90 
  -1  -7   0  763.82   26.40 
  -1  -7   0  716.33   26.40 
  -1  -7   0  731.33   26.40 
  -1  -7   0  739.53   25.70 
  -1  -7   0  680.43   25.30 
  -1  -7   0  717.33   26.10 
   1   7   0  602.64   35.40 
   1   7   0  702.13   25.90 
   1   7   0  742.03   26.30 
   1   7   0  745.83   27.90 
   1   7   0  745.83   26.70 
   1   7   0  738.93   25.50 
   1   7   0  747.03   25.40 
   1   7   0  702.83   25.20 
  -2  -7   0  564.94   21.10 
  -2  -7   0  489.05   18.90 
  -2  -7   0  503.85   19.00 
  -2  -7   0  547.15   19.60 
  -2  -7   0  523.85   19.70 
  -2  -7   0  543.85   19.40 
  -2  -7   0  524.25   19.90 
  -2  -7   0  540.45   20.00 
  -2  -7   0  537.25   20.00 
   2   7   0  546.15   20.00 
   2   7   0  549.45   19.10 
   2   7   0  562.14   21.60 
   2   7   0  540.95   19.00 
   2   7   0  536.95   20.20 
   2   7   0  510.75   19.80 
   2   7   0  560.64   19.10 
  -3  -7   0  460.05   17.10 
  -3  -7   0  479.25   17.60 
  -3  -7   0  464.35   17.40 
  -3  -7   0  488.55   18.00 
  -3  -7   0  495.65   18.10 
  -3  -7   0  471.85   17.50 
  -3  -7   0  499.05   18.90 
  -3  -7   0  479.25   17.90 
   3   7   0  482.25   17.10 
   3   7   0  488.35   18.00 
   3   7   0  470.15   17.30 
   3   7   0  462.35   17.90 
   3   7   0  493.15   19.50 
   3   7   0  494.05   17.10 
   3   7   0  467.65   18.10 
  -4  -7   0  322.17   12.00 
  -4  -7   0  310.67   12.00 
  -4  -7   0  297.47   11.90 
  -4  -7   0  313.47   12.40 
  -4  -7   0  319.57   13.10 
  -4  -7   0  312.97   12.30 
   4   7   0  310.17   12.30 
   4   7   0  299.57   12.30 
   4   7   0  311.57   11.90 
   4   7   0  328.07   11.60 
   4   7   0  302.17   11.00 
   4   7   0  316.77   11.60 
   4   7   0  321.47   13.90 
  -5  -7   0    4.20    1.30 
  -5  -7   0    4.80    1.50 
  -5  -7   0    9.30    1.40 
  -5  -7   0    7.90    1.60 
  -5  -7   0    4.80    1.20 
   5   7   0    4.50    1.10 
   5   7   0    4.80    1.40 
   5   7   0   -0.60    6.70 
   5   7   0    9.00    1.30 
   5   7   0    5.10    1.40 
   5   7   0    4.80    2.00 
   5   7   0    2.70    1.20 
  -6  -7   0   33.60    2.50 
  -6  -7   0   28.00    2.40 
  -6  -7   0   27.00    2.70 
  -6  -7   0   28.80    2.50 
  -6  -7   0   30.20    2.90 
   6   7   0   28.80    2.40 
   6   7   0   27.50    3.30 
   6   7   0   29.20    2.10 
   6   7   0   33.10    2.30 
   6   7   0   33.30    2.60 
  -7  -7   0   83.99    4.90 
  -7  -7   0   74.99    4.50 
  -7  -7   0   69.69    3.90 
  -7  -7   0   76.29    4.40 
   7   7   0   85.49    4.00 
   7   7   0   73.19    3.70 
   7   7   0   76.29    4.20 
   7   7   0   81.29    4.10 
  -8  -7   0   25.70    2.50 
  -8  -7   0   20.70    2.10 
  -8  -7   0   24.70    2.80 
  -8  -7   0   23.20    2.50 
   8   7   0   27.80    2.20 
   8   7   0   22.50    2.20 
   8   7   0   25.70    2.20 
  -9  -7   0  142.99    6.40 
  -9  -7   0  133.49    5.90 
  -9  -7   0  149.49    6.20 
   9   7   0  143.89    5.80 
   9   7   0  144.29    6.00 
   9   7   0  132.39    5.80 
 -10  -7   0   19.70    1.80 
  10   7   0   21.10    1.70 
  10   7   0   20.10    1.50 
   3  -8   0   40.00    2.80 
   3  -8   0   41.40    2.80 
  -3   8   0   39.30    2.30 
   2  -8   0  127.69    6.10 
   2  -8   0  120.69    5.40 
   2  -8   0  130.29    6.20 
  -2   8   0  115.79    5.00 
  -2   8   0  132.29    5.50 
  -2   8   0  125.79    5.70 
   1  -8   0   75.59    4.70 
   1  -8   0   70.99    3.90 
   1  -8   0   72.59    4.60 
   1  -8   0   70.09    3.80 
  -1   8   0   71.99    3.90 
  -1   8   0   70.69    3.50 
  -1   8   0   72.29    4.20 
   0  -8   0   51.39    3.50 
   0  -8   0   50.09    3.90 
   0  -8   0   49.60    4.50 
   0  -8   0   44.70    3.40 
   0  -8   0   54.19    3.90 
   0  -8   0   53.39    3.30 
   0   8   0   50.89    3.50 
   0   8   0   51.89    3.30 
   0   8   0   56.79    3.50 
   0   8   0   41.80    3.90 
   0   8   0   51.79    9.00 
   0   8   0   50.69    2.90 
  -1  -8   0  367.26   14.20 
  -1  -8   0  357.76   13.50 
  -1  -8   0  357.46   13.60 
  -1  -8   0  331.87   14.00 
  -1  -8   0  353.96   15.30 
  -1  -8   0  348.97   13.70 
   1   8   0  362.26   13.20 
   1   8   0  360.96   13.00 
   1   8   0  371.76   14.10 
   1   8   0  334.57   14.30 
   1   8   0  323.37   12.70 
   1   8   0  347.37   13.60 
  -2  -8   0  338.87   13.60 
  -2  -8   0  314.87   13.50 
  -2  -8   0  338.77   13.20 
  -2  -8   0  334.67   14.70 
  -2  -8   0  342.87   13.70 
  -2  -8   0  353.26   13.10 
  -2  -8   0  342.77   13.40 
   2   8   0  329.27   13.80 
   2   8   0  346.87   12.50 
   2   8   0  358.06   13.80 
   2   8   0  337.77   12.70 
   2   8   0  352.86   12.70 
   2   8   0  334.07   15.10 
  -3  -8   0  613.04   24.30 
  -3  -8   0  630.54   23.40 
  -3  -8   0  606.44   23.20 
  -3  -8   0  631.14   22.70 
  -3  -8   0  643.44   22.90 
  -3  -8   0  634.84   23.20 
   3   8   0  660.13   23.50 
   3   8   0  635.24   22.30 
   3   8   0  596.64   24.80 
   3   8   0  627.54   22.50 
   3   8   0  659.93   22.40 
  -4  -8   0  151.88    7.10 
  -4  -8   0  168.18    7.70 
  -4  -8   0  164.88    7.60 
  -4  -8   0  170.38    7.20 
  -4  -8   0  168.88    7.10 
  -4  -8   0  136.29    8.30 
  -4  -8   0  155.68    6.90 
   4   8   0  160.78    8.90 
   4   8   0  167.28    6.80 
   4   8   0  168.78    7.60 
   4   8   0  163.68    7.00 
   4   8   0  168.48    6.70 
  -5  -8   0    7.50    1.50 
  -5  -8   0    8.50    1.90 
  -5  -8   0    7.90    1.80 
  -5  -8   0    4.10    1.30 
  -5  -8   0    6.80    1.40 
   5   8   0    5.50    2.30 
   5   8   0   -0.50    7.60 
   5   8   0    6.00    1.30 
   5   8   0    6.30    1.50 
   5   8   0    7.60    1.30 
   5   8   0    6.90    1.60 
  -6  -8   0   41.90    3.00 
  -6  -8   0   41.40    3.30 
  -6  -8   0   43.70    3.50 
  -6  -8   0   40.70    2.90 
  -6  -8   0   46.20    3.20 
   6   8   0   42.80    3.20 
   6   8   0   42.90    2.80 
   6   8   0   43.60    2.70 
   6   8   0   42.20    2.70 
   6   8   0   47.00    3.10 
  -7  -8   0    2.40    1.20 
  -7  -8   0    6.50    1.30 
  -7  -8   0    2.70    1.50 
  -7  -8   0   -0.80    1.20 
   7   8   0    1.20    1.00 
   7   8   0    1.40    1.20 
   7   8   0    0.30    0.90 
   7   8   0    1.10    1.00 
  -8  -8   0   34.60    2.80 
  -8  -8   0   43.70    3.20 
  -8  -8   0   35.80    2.80 
   8   8   0   37.40    2.80 
   8   8   0   35.50    2.20 
   8   8   0   38.50    2.40 
   8   8   0   34.40    2.40 
  -9  -8   0   27.80    2.50 
  -9  -8   0   27.90    2.20 
   9   8   0   30.20    2.10 
   9   8   0   27.10    1.90 
   9   8   0   26.70    2.00 
   1  -9   0  118.99    5.60 
   1  -9   0  121.79    5.10 
   1  -9   0  129.49    5.70 
  -1   9   0  112.89    4.70 
  -1   9   0  128.29    5.10 
  -1   9   0  114.79    5.30 
   0  -9   0   48.30    3.60 
   0  -9   0   45.80    2.80 
   0  -9   0   48.70    3.10 
   0  -9   0   46.10    3.40 
   0   9   0   49.90    2.90 
   0   9   0   45.90    2.60 
   0   9   0   46.70    3.10 
   0   9   0   46.60    3.20 
  -1  -9   0   43.40    3.60 
  -1  -9   0   39.40    3.00 
  -1  -9   0   43.20    2.90 
  -1  -9   0   43.40    3.10 
  -1  -9   0   38.30    3.20 
   1   9   0   45.00    2.80 
   1   9   0   42.40    2.60 
   1   9   0   42.70    3.10 
  -2  -9   0  134.49    6.10 
  -2  -9   0  127.39    5.90 
  -2  -9   0  127.79    6.60 
  -2  -9   0  138.59    6.30 
  -2  -9   0  112.59    7.00 
  -2  -9   0  141.39    6.70 
   2   9   0  135.29    5.60 
   2   9   0  121.09    5.30 
   2   9   0  124.89    5.60 
   2   9   0  130.29    6.40 
  -3  -9   0  112.59    7.00 
  -3  -9   0  126.09    5.90 
  -3  -9   0  129.89    6.10 
  -3  -9   0  131.09    6.30 
  -3  -9   0  131.89    6.60 
   3   9   0  125.39    5.50 
   3   9   0  129.29    5.50 
   3   9   0  132.39    6.50 
  -4  -9   0   48.90    3.50 
  -4  -9   0   54.79    4.10 
  -4  -9   0   56.59    3.40 
  -4  -9   0   54.19    3.80 
  -4  -9   0   58.19    3.70 
   4   9   0   52.89    3.30 
   4   9   0   57.39    4.00 
   4   9   0   55.79    3.10 
   4   9   0   54.09    3.10 
  -5  -9   0  112.79    5.90 
  -5  -9   0  113.79    5.80 
  -5  -9   0  111.99    5.40 
  -5  -9   0  107.19    5.40 
  -5  -9   0  108.19    5.30 
   5   9   0  112.89    5.80 
   5   9   0  112.49    5.00 
   5   9   0  119.49    5.40 
   5   9   0  113.89    5.10 
  -6  -9   0  271.87   10.30 
  -6  -9   0  266.17   10.90 
  -6  -9   0  246.18   10.20 
  -6  -9   0  257.67   10.30 
  -6  -9   0  272.97   10.80 
   6   9   0  269.97   10.00 
   6   9   0  263.67   10.30 
   6   9   0  249.78   10.50 
   6   9   0  261.97   10.00 
  -7  -9   0  303.97   12.00 
  -7  -9   0  301.57   11.90 
  -7  -9   0  289.77   11.40 
  -7  -9   0  309.87   11.70 
   7   9   0  305.07   11.60 
   7   9   0  305.07   11.20 
   7   9   0  308.67   11.30 
  -8  -9   0   26.80    2.40 
  -8  -9   0   28.20    2.60 
  -8  -9   0   27.60    2.30 
   8   9   0   26.60    1.90 
   8   9   0   27.30    1.80 
   8   9   0   27.80    2.30 
  -9  -9   0   48.00    2.70 
   9   9   0   48.70    3.40 
   9   9   0   43.00    2.30 
  -1 -10   0   98.69    4.80 
  -1 -10   0   96.29    4.30 
  -1 -10   0   87.09    4.10 
   1  10   0   87.69    4.30 
   1  10   0   95.99    4.10 
   1  10   0   96.59    3.90 
  -2 -10   0  197.98    7.60 
  -2 -10   0  178.68    7.60 
  -2 -10   0  196.98    8.10 
  -2 -10   0  189.58    7.60 
   2  10   0  182.08    7.20 
   2  10   0  186.88    7.80 
   2  10   0  177.98    7.10 
  -3 -10   0  123.19    5.80 
  -3 -10   0  135.49    6.30 
  -3 -10   0  126.29    5.90 
  -3 -10   0  126.89    5.60 
  -3 -10   0  129.49    5.70 
   3  10   0  116.09    5.10 
   3  10   0  130.89    6.10 
   3  10   0  135.79    5.30 
  -4 -10   0   70.99    3.80 
  -4 -10   0   62.59    3.70 
  -4 -10   0   72.59    3.90 
  -4 -10   0   71.29    4.10 
  -4 -10   0   75.89    4.40 
   4  10   0   74.49    4.30 
   4  10   0   74.89    3.50 
   4  10   0   67.39    3.40 
  -5 -10   0    2.60    1.40 
  -5 -10   0    4.10    1.20 
  -5 -10   0    4.40    1.60 
  -5 -10   0    2.70    1.10 
   5  10   0    3.10    1.00 
   5  10   0    3.60    1.20 
   5  10   0    3.20    1.10 
   5  10   0    1.80    1.20 
  -6 -10   0   63.29    3.30 
  -6 -10   0   57.69    3.20 
  -6 -10   0   65.69    3.90 
  -6 -10   0   61.59    3.30 
  -6 -10   0   73.19    3.90 
   6  10   0   60.39    3.50 
   6  10   0   60.19    3.10 
   6  10   0   64.69    3.40 
   6  10   0   60.39    3.10 
  -7 -10   0   50.19    2.70 
  -7 -10   0   49.20    2.80 
  -7 -10   0   51.39    3.10 
  -7 -10   0   53.39    3.20 
   7  10   0   51.29    2.60 
   7  10   0   51.69    2.90 
   7  10   0   48.90    2.60 
  -8 -10   0    8.00    1.60 
  -8 -10   0    9.80    1.30 
   8  10   0    7.50    1.30 
  -4 -11   0  122.29    5.50 
  -4 -11   0  122.59    5.10 
  -5 -11   0   92.69    4.40 
  -5 -11   0   87.29    4.20 
   7  10  -1   29.20    1.80 
   7  10  -1   30.30    2.10 
   7  10  -1   30.00    1.80 
  -7 -10   1   32.10    2.30 
  -7 -10   1   28.20    1.90 
  -7 -10   1   39.00    2.70 
  -7 -10   1   31.00    2.30 
   6  10  -1   93.59    4.30 
   6  10  -1   93.29    4.10 
   6  10  -1   96.39    4.10 
  -6 -10   1   85.39    4.10 
  -6 -10   1   96.59    4.30 
  -6 -10   1   91.09    4.30 
  -6 -10   1   98.99    4.70 
  -6 -10   1   98.89    4.60 
   5  10  -1  224.68    9.10 
   5  10  -1  241.08    9.70 
   5  10  -1  242.78    9.00 
   5  10  -1  242.08    9.00 
  -5 -10   1  249.48    9.40 
  -5 -10   1  236.78    9.60 
  -5 -10   1  244.68    9.60 
  -5 -10   1  239.88    9.30 
   4  10  -1   34.20    2.30 
   4  10  -1   37.90    2.90 
   4  10  -1   36.20    2.20 
   4  10  -1   37.40    2.30 
  -4 -10   1   37.40    2.80 
  -4 -10   1   39.00    3.00 
  -4 -10   1   32.90    2.40 
  -4 -10   1   32.90    2.60 
  -4 -10   1   36.70    2.60 
   3  10  -1  148.09    6.60 
   3  10  -1  147.39    5.90 
   3  10  -1  143.09    5.80 
  -3 -10   1  135.59    6.20 
  -3 -10   1  153.48    6.70 
  -3 -10   1  145.49    6.40 
  -3 -10   1  152.08    6.40 
  -3 -10   1  148.59    6.20 
   2  10  -1    6.10    1.30 
   2  10  -1    5.20    1.00 
  -2 -10   1    4.60    1.30 
  -2 -10   1    4.70    1.10 
  -2 -10   1    7.10    1.70 
  -2 -10   1    5.30    1.10 
   1  10  -1  204.08    8.00 
   1  10  -1  229.28    8.70 
  -1 -10   1  231.88    8.50 
  -1 -10   1  226.78    8.60 
  -1 -10   1  223.48    8.70 
  -1 -10   1  206.88    8.20 
   8   9  -1   54.39    3.00 
   8   9  -1   53.79    2.70 
   8   9  -1   49.30    2.60 
  -8  -9   1   55.99    3.10 
  -8  -9   1   58.19    3.10 
  -8  -9   1   52.09    3.10 
   7   9  -1   80.99    3.70 
   7   9  -1   79.39    3.70 
   7   9  -1   84.89    4.20 
  -7  -9   1   81.49    4.40 
  -7  -9   1   78.09    4.00 
  -7  -9   1   75.39    3.80 
  -7  -9   1   81.59    4.30 
  -7  -9   1   71.19    3.80 
   6   9  -1  132.49    5.80 
   6   9  -1  128.39    5.40 
   6   9  -1  129.69    5.40 
   6   9  -1  103.69    6.90 
  -6  -9   1  135.89    6.20 
  -6  -9   1  124.59    5.70 
  -6  -9   1  128.89    5.70 
  -6  -9   1  123.19    5.70 
  -6  -9   1  129.09    6.20 
   5   9  -1   20.00    2.40 
   5   9  -1   21.30    2.00 
   5   9  -1   21.10    1.90 
   5   9  -1   22.50    2.30 
  -5  -9   1   22.10    2.10 
  -5  -9   1   19.70    2.10 
  -5  -9   1   23.30    2.70 
  -5  -9   1   21.90    2.30 
  -5  -9   1   14.70    2.00 
   4   9  -1   72.89    3.70 
   4   9  -1   71.89    3.90 
   4   9  -1   78.09    4.60 
   4   9  -1   78.69    3.70 
  -4  -9   1   73.09    4.10 
  -4  -9   1   73.89    4.20 
  -4  -9   1   77.39    4.60 
  -4  -9   1   65.49    4.10 
  -4  -9   1   73.39    4.40 
   3   9  -1  107.29    4.80 
   3   9  -1  105.49    4.90 
   3   9  -1  109.29    4.80 
   3   9  -1  102.79    5.50 
  -3  -9   1  107.49    5.30 
  -3  -9   1  107.49    5.10 
  -3  -9   1  101.59    5.30 
  -3  -9   1  108.19    5.50 
  -3  -9   1  117.19    5.80 
  -3  -9   1   85.99    6.00 
   2   9  -1  205.08    9.00 
   2   9  -1  204.78    8.00 
   2   9  -1  192.18    8.00 
   2   9  -1  210.68    8.10 
  -2  -9   1  211.78    8.70 
  -2  -9   1  202.08    9.00 
  -2  -9   1  207.28    8.70 
  -2  -9   1  209.58    9.00 
  -2  -9   1  208.68    8.50 
   1   9  -1   13.00    2.00 
   1   9  -1   18.20    1.80 
   1   9  -1   18.40    1.80 
  -1  -9   1   14.80    2.10 
  -1  -9   1   16.60    1.80 
  -1  -9   1   13.20    1.80 
  -1  -9   1   12.50    2.10 
   0   9  -1  107.39    5.30 
   0   9  -1  119.49    5.00 
   0   9  -1  114.99    4.80 
   0  -9   1  109.69    5.70 
   0  -9   1  116.39    5.20 
   0  -9   1  108.69    4.90 
   0  -9   1  120.79    5.70 
  -1   9  -1  119.39    4.90 
   1  -9   1   99.49    4.80 
   1  -9   1  132.39    5.70 
   1  -9   1  121.59    5.40 
   9   8  -1   62.29    3.10 
   9   8  -1   57.59    3.00 
   9   8  -1   64.49    3.00 
  -9  -8   1   67.09    3.30 
  -9  -8   1   53.49    3.10 
  -9  -8   1   63.29    3.20 
   8   8  -1  422.16   15.60 
   8   8  -1  425.16   15.30 
  -8  -8   1  440.86   15.90 
  -8  -8   1  414.16   15.60 
  -8  -8   1  435.76   16.00 
   7   8  -1   87.99    4.50 
   7   8  -1   82.49    4.20 
   7   8  -1   87.99    4.20 
   7   8  -1   83.99    4.00 
  -7  -8   1   93.99    4.70 
  -7  -8   1   93.59    5.00 
  -7  -8   1   81.59    4.20 
  -7  -8   1   91.99    4.90 
  -7  -8   1   85.89    4.60 
   6   8  -1  151.38    6.50 
   6   8  -1  167.18    7.00 
   6   8  -1  155.88    6.50 
   6   8  -1  155.78    6.40 
  -6  -8   1  154.48    7.30 
  -6  -8   1  156.18    6.90 
  -6  -8   1  154.58    6.80 
  -6  -8   1  157.58    7.30 
  -6  -8   1  151.18    6.80 
   5   8  -1   26.90    2.70 
   5   8  -1   29.90    2.20 
   5   8  -1   30.60    2.20 
   5   8  -1   28.40    2.60 
  -5  -8   1   26.90    2.70 
  -5  -8   1   28.60    2.60 
  -5  -8   1   27.10    2.90 
  -5  -8   1   26.80    2.50 
  -5  -8   1   26.40    2.50 
   4   8  -1  397.86   14.30 
   4   8  -1  383.66   14.30 
   4   8  -1  383.86   14.60 
   4   8  -1  399.36   15.20 
   4   8  -1  370.36   16.70 
  -4  -8   1  395.56   15.20 
  -4  -8   1  414.56   14.90 
  -4  -8   1  375.86   14.70 
  -4  -8   1  369.86   14.50 
  -4  -8   1  385.26   15.10 
  -4  -8   1  391.86   14.70 
   3   8  -1  161.98    6.40 
   3   8  -1  160.08    6.40 
   3   8  -1  144.69    7.40 
   3   8  -1  148.89    6.60 
   3   8  -1  157.08    7.30 
   3   8  -1  146.39    8.50 
  -3  -8   1  161.38    7.40 
  -3  -8   1  145.09    7.00 
  -3  -8   1  152.98    6.90 
  -3  -8   1  157.98    6.80 
  -3  -8   1  147.09    7.20 
  -3  -8   1  141.79    7.10 
  -3  -8   1  149.88    8.00 
   2   8  -1  321.17   11.70 
   2   8  -1  296.27   14.20 
   2   8  -1  326.47   12.80 
   2   8  -1  293.47   11.80 
   2   8  -1  318.77   11.80 
   2   8  -1  304.17   13.10 
   2   8  -1  327.67   11.80 
  -2  -8   1  323.87   12.40 
  -2  -8   1  308.57   12.80 
  -2  -8   1  333.87   12.80 
  -2  -8   1  316.57   13.90 
  -2  -8   1  327.07   12.20 
  -2  -8   1  309.87   12.40 
  -2  -8   1  279.57   12.60 
   1   8  -1  247.38   10.30 
   1   8  -1  242.78    9.30 
   1   8  -1  234.68    9.40 
   1   8  -1  225.08   10.60 
   1   8  -1  236.68    9.10 
  -1  -8   1  250.37    9.70 
  -1  -8   1  252.07    9.90 
  -1  -8   1  245.88   10.30 
  -1  -8   1  238.78   10.50 
  -1  -8   1  243.78   11.50 
  -1  -8   1  220.38    9.80 
   0   8  -1   11.40    1.50 
   0   8  -1    5.60    6.50 
   0   8  -1    7.20    2.20 
   0   8  -1    7.70    1.70 
   0   8  -1    7.00    1.40 
   0  -8   1    6.00    2.20 
   0  -8   1    5.90    1.80 
   0  -8   1    8.30    1.90 
   0  -8   1    6.20    1.40 
   0  -8   1    8.70    1.60 
  -1   8  -1   55.59    3.00 
  -1   8  -1   44.00    3.20 
  -1   8  -1   55.19    3.20 
   1  -8   1   49.20    3.20 
   1  -8   1   58.69    4.10 
   1  -8   1   51.49    3.00 
   1  -8   1   54.39    3.90 
   1  -8   1   51.79    4.10 
  -2   8  -1   97.19    4.40 
  -2   8  -1   92.59    4.10 
   2  -8   1  100.79    5.10 
   2  -8   1   99.29    5.30 
   2  -8   1   94.49    4.80 
  -3   8  -1    1.00    0.90 
   3  -8   1    0.00    0.90 
   3  -8   1    1.00    1.00 
   9   7  -1  252.87    9.30 
   9   7  -1  240.78    9.10 
  -9  -7   1  252.67    9.40 
  -9  -7   1  246.48    9.50 
  -9  -7   1  213.88    8.90 
   8   7  -1   37.30    2.40 
   8   7  -1   36.40    2.70 
   8   7  -1   39.10    2.70 
  -8  -7   1   35.60    2.90 
  -8  -7   1   37.10    2.70 
  -8  -7   1   35.20    3.10 
  -8  -7   1   31.30    2.40 
   7   7  -1  402.26   14.90 
   7   7  -1  419.76   15.20 
   7   7  -1  416.56   15.30 
   7   7  -1  437.36   15.60 
  -7  -7   1  401.76   15.80 
  -7  -7   1  419.96   16.00 
  -7  -7   1  404.46   15.30 
  -7  -7   1  419.46   15.60 
   6   7  -1  358.06   12.80 
   6   7  -1  349.96   13.10 
   6   7  -1  314.17   14.70 
   6   7  -1  326.97   12.60 
   6   7  -1  325.07   12.10 
   6   7  -1  358.66   12.90 
  -6  -7   1  352.66   13.60 
  -6  -7   1  336.57   13.00 
  -6  -7   1  339.47   13.00 
  -6  -7   1  353.16   13.60 
  -6  -7   1  352.46   13.20 
   5   7  -1  316.27   12.10 
   5   7  -1  294.17   12.20 
   5   7  -1  306.27   13.80 
   5   7  -1  310.57   11.60 
   5   7  -1  314.27   11.60 
   5   7  -1  316.27   11.10 
  -5  -7   1  314.87   12.00 
  -5  -7   1  311.77   12.50 
  -5  -7   1  324.37   12.50 
  -5  -7   1  302.57   12.00 
  -5  -7   1  316.17   12.10 
   4   7  -1   93.19    5.30 
   4   7  -1   97.99    4.00 
   4   7  -1   94.39    4.40 
   4   7  -1  103.29    6.30 
   4   7  -1  104.79    4.50 
   4   7  -1  101.09    4.80 
   4   7  -1   93.59    5.00 
  -4  -7   1   92.89    5.20 
  -4  -7   1   94.09    4.90 
  -4  -7   1   99.49    5.20 
  -4  -7   1   98.89    4.80 
  -4  -7   1   98.39    4.90 
  -4  -7   1   90.69    5.00 
  -4  -7   1   99.19    4.80 
   3   7  -1  877.21   28.60 
   3   7  -1  847.22   29.80 
   3   7  -1  815.12   28.60 
   3   7  -1  851.01   29.50 
   3   7  -1  814.12   28.00 
   3   7  -1  836.22   31.10 
  -3  -7   1  805.22   29.00 
  -3  -7   1  832.22   29.50 
  -3  -7   1  787.72   29.30 
  -3  -7   1  815.22   29.30 
  -3  -7   1  823.42   30.30 
  -3  -7   1  769.22   28.40 
  -3  -7   1  823.62   29.40 
  -3  -7   1  840.12   29.00 
  -3  -7   1  784.12   28.70 
   2   7  -1  111.09    4.80 
   2   7  -1  103.99    4.80 
   2   7  -1  111.29    5.70 
   2   7  -1  109.49    4.40 
   2   7  -1  112.39    4.80 
   2   7  -1  116.59    6.90 
   2   7  -1  117.29    6.00 
  -2  -7   1  111.69    6.40 
  -2  -7   1  107.29    5.50 
  -2  -7   1  105.19    5.10 
  -2  -7   1  105.69    5.20 
  -2  -7   1  104.19    5.40 
  -2  -7   1  106.19    5.60 
  -2  -7   1  103.39    5.50 
   1   7  -1  203.48    9.30 
   1   7  -1  197.38    8.10 
   1   7  -1  200.78    7.90 
   1   7  -1  195.38   10.00 
   1   7  -1  217.08    9.00 
   1   7  -1  206.18    8.00 
  -1  -7   1  197.28    9.80 
  -1  -7   1  207.38    8.40 
  -1  -7   1  198.18    8.90 
  -1  -7   1  216.98    9.00 
  -1  -7   1  211.58    8.60 
  -1  -7   1  190.78    8.50 
  -1  -7   1  207.38    9.10 
   0   7  -1 1108.59   37.40 
   0   7  -1 1024.60   37.10 
   0   7  -1 1122.19   37.70 
   0   7  -1 1038.80   39.80 
   0   7  -1 1104.79   39.10 
   0   7  -1 1084.29   38.30 
   0  -7   1 1126.89   40.00 
   0  -7   1 1091.49   38.40 
   0  -7   1 1081.99   37.70 
   0  -7   1 1076.79   38.60 
   0  -7   1 1092.19   37.90 
   0  -7   1 1051.59   38.50 
  -1   7  -1  181.28   15.50 
  -1   7  -1  187.78    7.60 
  -1   7  -1  194.98    7.90 
  -1   7  -1  190.98    9.20 
  -1   7  -1  186.68    8.30 
   1  -7   1  185.78    9.70 
   1  -7   1  197.58    8.90 
   1  -7   1  180.28    7.70 
   1  -7   1  190.58    8.60 
   1  -7   1  177.98    7.90 
  -2   7  -1   84.99    4.40 
  -2   7  -1   85.89    4.30 
  -2   7  -1   81.79    4.00 
  -2   7  -1   79.49    5.30 
  -2   7  -1   69.99    6.10 
  -2   7  -1   81.39    4.50 
   2  -7   1   84.49    4.30 
   2  -7   1   76.49    5.60 
   2  -7   1   83.69    4.90 
   2  -7   1   86.59    5.20 
  -3   7  -1   60.59    3.70 
  -3   7  -1   60.69    3.60 
  -3   7  -1   66.79    3.20 
  -3   7  -1   66.09    3.40 
   3  -7   1   65.19    4.10 
   3  -7   1   65.99    4.30 
  -4   7  -1   23.30    1.90 
  -4   7  -1   24.40    2.00 
  -4   7  -1   22.10    2.00 
  -4   7  -1   25.40    1.80 
   4  -7   1   24.30    2.30 
   4  -7   1   26.10    2.40 
  10   6  -1   34.90    2.00 
 -10  -6   1   40.40    2.30 
 -10  -6   1   33.20    2.50 
   9   6  -1   23.60    1.90 
   9   6  -1   22.50    2.10 
  -9  -6   1   23.10    2.20 
  -9  -6   1   22.10    2.50 
  -9  -6   1   24.20    2.10 
   8   6  -1  217.68    8.60 
   8   6  -1  200.08    8.30 
   8   6  -1  208.28    8.30 
  -8  -6   1  203.68    8.40 
  -8  -6   1  208.38    8.70 
  -8  -6   1  215.48    8.70 
  -8  -6   1  214.78    9.00 
  -8  -6   1  199.08    9.00 
   7   6  -1  217.08    8.50 
   7   6  -1  206.68    7.90 
   7   6  -1  211.48    8.70 
   7   6  -1  221.68    8.80 
  -7  -6   1  215.88    8.70 
  -7  -6   1  211.58    9.30 
  -7  -6   1  218.28    9.20 
  -7  -6   1  216.28    9.00 
  -7  -6   1  230.38    9.40 
   6   6  -1  284.17   10.10 
   6   6  -1  262.67    9.90 
   6   6  -1  263.77   10.40 
   6   6  -1  262.77    9.60 
   6   6  -1  248.28   11.90 
  -6  -6   1  279.17   10.90 
  -6  -6   1  262.97   10.30 
  -6  -6   1  271.97   10.80 
  -6  -6   1  268.17   10.50 
  -6  -6   1  269.67   10.80 
  -6  -6   1  259.47   10.30 
  -6  -6   1  249.88   10.20 
   5   6  -1  238.68    9.10 
   5   6  -1  250.47   11.20 
   5   6  -1  239.88    9.10 
   5   6  -1  232.58    8.80 
   5   6  -1  227.38    9.70 
   5   6  -1  250.37    8.80 
   5   6  -1  249.18    9.50 
  -5  -6   1  239.08    9.50 
  -5  -6   1  241.98    9.90 
  -5  -6   1  237.38    9.40 
  -5  -6   1  236.58    9.50 
  -5  -6   1  238.18    9.80 
   4   6  -1    3.20    1.00 
   4   6  -1    4.10    0.80 
   4   6  -1    4.30    0.80 
   4   6  -1    3.00    0.80 
   4   6  -1    3.20    0.90 
   4   6  -1    5.70    7.80 
   4   6  -1    3.10    1.10 
   4   6  -1    3.20    1.10 
   4   6  -1    2.00    1.60 
  -4  -6   1    2.70    0.90 
  -4  -6   1    3.70    1.40 
  -4  -6   1    5.10    1.40 
  -4  -6   1    4.00    1.10 
  -4  -6   1    6.60    1.30 
  -4  -6   1    2.30    1.10 
  -4  -6   1    8.80    1.90 
   3   6  -1  268.17    9.40 
   3   6  -1  265.57   11.40 
   3   6  -1  251.67    9.00 
   3   6  -1  248.48    9.10 
   3   6  -1  260.87   10.40 
   3   6  -1  255.47    9.40 
   3   6  -1  250.87   10.00 
   3   6  -1  239.78   10.00 
  -3  -6   1  245.58    9.70 
  -3  -6   1  261.27   10.00 
  -3  -6   1  244.48    9.60 
  -3  -6   1  240.08   10.10 
  -3  -6   1  253.47    9.70 
  -3  -6   1  251.07   10.70 
  -3  -6   1  246.78   10.00 
  -3  -6   1  245.38   10.40 
  -3  -6   1  251.87   10.00 
  -3  -6   1  251.97    9.30 
   2   6  -1  319.07   11.90 
   2   6  -1  348.97   14.00 
   2   6  -1  343.97   12.70 
   2   6  -1  320.67   11.60 
   2   6  -1  324.07   20.40 
   2   6  -1  318.47   12.60 
   2   6  -1  315.17   11.70 
   2   6  -1  336.27   13.00 
  -2  -6   1  342.57   12.70 
  -2  -6   1  313.87   12.50 
  -2  -6   1  325.27   11.90 
  -2  -6   1  317.07   12.20 
  -2  -6   1  349.77   13.60 
  -2  -6   1  321.17   12.70 
  -2  -6   1  349.07   12.40 
  -2  -6   1  309.77   12.50 
   1   6  -1   39.70    2.60 
   1   6  -1   44.30    2.20 
   1   6  -1   31.70    8.40 
   1   6  -1   45.20    3.00 
   1   6  -1   48.00    3.90 
   1   6  -1   47.40    3.10 
   1   6  -1   39.90    2.40 
   1   6  -1   48.20    3.40 
  -1  -6   1   48.90    3.10 
  -1  -6   1   43.10    2.40 
  -1  -6   1   45.50    2.70 
  -1  -6   1   44.70    2.80 
  -1  -6   1   37.60    3.00 
  -1  -6   1   45.80    3.10 
  -1  -6   1   48.10    3.70 
  -1  -6   1   41.10    2.90 
   0   6  -1  155.38    6.40 
   0   6  -1  164.78    7.50 
   0   6  -1  157.18    6.90 
   0   6  -1  128.89   13.70 
   0   6  -1  153.98    6.20 
   0   6  -1  147.79    6.80 
   0   6  -1  148.79    5.70 
   0   6  -1  154.28    8.00 
   0  -6   1  145.29    6.80 
   0  -6   1  140.39    6.50 
   0  -6   1  153.68    7.10 
   0  -6   1  151.08    6.20 
   0  -6   1  161.68    8.00 
   0  -6   1  153.08    6.40 
   0  -6   1  158.58    7.10 
   0  -6   1  153.28    6.60 
  -1   6  -1  624.74   22.90 
  -1   6  -1  585.44   22.00 
  -1   6  -1  616.24   21.50 
  -1   6  -1  617.74   21.30 
   1  -6   1  582.44   22.30 
   1  -6   1  618.74   23.60 
   1  -6   1  563.64   21.40 
   1  -6   1  599.04   22.30 
   1  -6   1  594.74   21.70 
   1  -6   1  613.34   22.20 
  -2   6  -1  431.06   18.50 
  -2   6  -1  457.65   25.40 
  -2   6  -1  473.15   16.60 
  -2   6  -1  454.85   17.20 
  -2   6  -1  475.95   16.80 
  -2   6  -1  478.65   18.40 
  -2   6  -1  451.75   17.00 
   2  -6   1  422.96   17.40 
   2  -6   1  469.75   17.90 
   2  -6   1  438.26   16.80 
   2  -6   1  456.65   17.50 
   2  -6   1  463.75   18.80 
  -3   6  -1  519.45   18.60 
  -3   6  -1  525.35   18.30 
  -3   6  -1  509.35   18.90 
  -3   6  -1  491.25   20.00 
  -3   6  -1  497.25   18.90 
   3  -6   1  520.05   19.70 
   3  -6   1  517.95   19.30 
   3  -6   1  504.55   20.50 
  -4   6  -1  181.48    7.40 
  -4   6  -1  181.68    7.20 
  -4   6  -1  187.28    7.90 
  -4   6  -1  181.88    7.80 
   4  -6   1  189.38    8.50 
   4  -6   1  180.98    8.10 
  -5   6  -1   53.79    3.10 
  -5   6  -1   54.69    3.20 
   5  -6   1   59.29    3.50 
   5  -6   1   60.59    3.50 
  10   5  -1   55.99    2.80 
  10   5  -1   55.39    2.80 
 -10  -5   1   58.79    2.90 
 -10  -5   1   59.09    3.00 
 -10  -5   1   55.69    2.90 
   9   5  -1   33.30    2.30 
   9   5  -1   29.60    2.30 
   9   5  -1   31.20    2.40 
  -9  -5   1   30.70    2.40 
  -9  -5   1   33.70    2.90 
  -9  -5   1   31.60    2.50 
   8   5  -1  465.25   16.40 
   8   5  -1  440.66   16.40 
   8   5  -1  457.25   16.60 
  -8  -5   1  460.15   16.80 
  -8  -5   1  469.75   17.20 
  -8  -5   1  434.36   17.20 
  -8  -5   1  441.86   17.10 
  -8  -5   1  444.06   16.60 
   7   5  -1  267.57   10.10 
   7   5  -1  261.47    9.80 
   7   5  -1  250.17    9.30 
   7   5  -1  251.97    9.90 
  -7  -5   1  251.47   10.60 
  -7  -5   1  254.47   10.70 
  -7  -5   1  257.27   10.10 
  -7  -5   1  253.37   10.20 
  -7  -5   1  256.87   10.40 
   6   5  -1  132.79    5.30 
   6   5  -1  135.49    5.20 
   6   5  -1  137.79    5.60 
   6   5  -1  128.49    7.20 
   6   5  -1  133.29    5.80 
   6   5  -1  130.49    5.80 
  -6  -5   1  144.69    6.10 
  -6  -5   1  121.99    6.10 
  -6  -5   1  145.09    6.40 
  -6  -5   1  136.09    5.90 
  -6  -5   1  129.49    6.10 
  -6  -5   1  128.49    5.70 
  -6  -5   1  137.69    6.30 
   5   5  -1  155.58    7.60 
   5   5  -1  147.29    5.80 
   5   5  -1  153.38    6.00 
   5   5  -1  146.59    5.60 
   5   5  -1  148.49    6.20 
   5   5  -1  145.69    5.70 
   5   5  -1  148.69    6.50 
  -5  -5   1  149.88    6.20 
  -5  -5   1  153.48    6.80 
  -5  -5   1  141.09    6.10 
  -5  -5   1  157.68    6.60 
  -5  -5   1  146.89    6.20 
  -5  -5   1  145.69    6.30 
  -5  -5   1  145.89    6.50 
  -5  -5   1  145.89    6.50 
   4   5  -1  637.04   22.70 
   4   5  -1  604.94   21.90 
   4   5  -1  614.44   22.70 
   4   5  -1  665.83   23.90 
  -4  -5   1  664.13   22.60 
   3   5  -1  480.85   17.10 
   3   5  -1  485.65   17.80 
   3   5  -1  540.25   25.20 
   3   5  -1  525.05   19.10 
   3   5  -1  505.75   17.90 
  -3  -5   1  483.25   18.30 
  -3  -5   1  481.05   17.70 
  -3  -5   1  489.45   17.20 
  -3  -5   1  482.25   18.10 
   2   5  -1  931.31   32.20 
   2   5  -1  902.21   31.40 
   2   5  -1  912.71   32.40 
   2   5  -1  926.11   33.20 
  -2  -5   1  922.61   32.80 
  -2  -5   1  932.61   31.60 
  -2  -5   1  947.31   32.20 
   1   5  -1  254.67    9.90 
   1   5  -1  283.97   11.00 
   1   5  -1  286.17   11.70 
   1   5  -1  280.27   10.60 
  -1  -5   1  287.07   11.40 
  -1  -5   1  278.17   10.10 
  -1  -5   1  280.97   10.70 
   0   5  -1  658.03   23.90 
   0   5  -1  700.43   25.30 
   0   5  -1  740.13   26.10 
   0   5  -1  720.93   32.80 
   0   5  -1  697.93   24.80 
   0  -5   1  719.43   25.00 
   0  -5   1  704.33   24.30 
   0  -5   1  672.43   25.40 
   0  -5   1  689.33   25.70 
  -1   5  -1   84.69    3.60 
  -1   5  -1   89.19    4.10 
  -1   5  -1   88.09    3.90 
  -1   5  -1   94.39    5.40 
  -1   5  -1   94.99    5.10 
  -1   5  -1   96.19    4.70 
  -1   5  -1   74.69    9.30 
  -1   5  -1   90.39    4.50 
   1  -5   1   89.29    4.60 
   1  -5   1   72.19    4.50 
   1  -5   1   92.59    4.00 
   1  -5   1   94.29    4.70 
   1  -5   1   89.89    4.30 
   1  -5   1   87.09    4.70 
   1  -5   1   96.79    5.50 
  -2   5  -1 1165.98   43.20 
  -2   5  -1 1268.57   42.90 
  -2   5  -1 1235.28   43.30 
  -2   5  -1 1274.17   44.70 
  -2   5  -1 1231.28   42.70 
  -2   5  -1 1224.68   43.30 
  -2   5  -1 1320.97   44.40 
  -2   5  -1 1310.57   52.39 
   2  -5   1 1301.87   44.90 
   2  -5   1 1174.28   42.90 
   2  -5   1 1170.88   42.70 
   2  -5   1 1272.17   43.70 
   2  -5   1 1262.57   43.90 
   2  -5   1 1247.68   42.70 
   2  -5   1 1249.97   43.60 
  -3   5  -1   36.60    3.00 
  -3   5  -1   37.20    2.40 
  -3   5  -1   37.40    3.00 
  -3   5  -1   41.20    2.90 
  -3   5  -1   39.70    3.70 
   3  -5   1   41.40    3.50 
   3  -5   1   39.60    2.60 
   3  -5   1   42.30    4.00 
   3  -5   1   39.70    3.60 
   3  -5   1   38.50    2.60 
  -4   5  -1   22.70    2.60 
  -4   5  -1   22.20    2.00 
  -4   5  -1   22.30    2.20 
  -4   5  -1   26.20    2.70 
  -4   5  -1   21.00    3.10 
   4  -5   1   25.70    3.10 
   4  -5   1   18.80    2.60 
   4  -5   1   20.90    2.00 
   4  -5   1   22.60    2.10 
  -5   5  -1   31.40    2.80 
  -5   5  -1   27.40    2.00 
  -5   5  -1   26.80    2.70 
  -5   5  -1   25.80    2.10 
   5  -5   1   28.10    2.20 
   5  -5   1   29.10    3.00 
   5  -5   1   31.10    3.00 
  -6   5  -1   41.50    2.70 
  -6   5  -1   42.60    2.80 
   6  -5   1   43.30    3.00 
   6  -5   1   39.40    2.20 
   6  -5   1   41.40    2.90 
  10   4  -1   73.19    3.30 
  10   4  -1   80.59    4.30 
  10   4  -1   74.69    3.40 
 -10  -4   1   69.19    3.40 
 -10  -4   1   76.49    3.60 
 -10  -4   1   77.19    3.60 
   9   4  -1  237.98    9.20 
   9   4  -1  233.88    9.10 
   9   4  -1  227.08    9.10 
  -9  -4   1  242.28    9.30 
  -9  -4   1  240.38    9.60 
   8   4  -1 1023.80   34.90 
   8   4  -1  986.90   35.90 
   8   4  -1 1028.30   35.10 
   8   4  -1 1007.60   34.90 
  -8  -4   1 1012.10   35.60 
  -8  -4   1 1035.80   35.20 
  -8  -4   1  988.20   35.00 
  -8  -4   1  955.90   35.60 
   7   4  -1  336.47   11.90 
   7   4  -1  345.77   13.40 
   7   4  -1  342.37   12.70 
   7   4  -1  326.57   14.50 
   7   4  -1  332.67   12.50 
  -7  -4   1  325.67   12.90 
  -7  -4   1  342.87   13.20 
  -7  -4   1  324.27   13.80 
  -7  -4   1  343.87   13.30 
  -7  -4   1  336.77   12.80 
  -7  -4   1  332.87   12.80 
   6   4  -1  769.02   26.20 
   6   4  -1  734.93   26.00 
   6   4  -1  748.93   25.60 
   6   4  -1  760.32   27.80 
   6   4  -1  711.83   27.60 
   6   4  -1  717.43   25.80 
   6   4  -1  755.02   25.70 
   6   4  -1  752.22   26.70 
   6   4  -1  740.63   26.10 
  -6  -4   1  742.73   26.50 
  -6  -4   1  744.83   26.40 
  -6  -4   1  744.73   26.70 
  -6  -4   1  761.32   26.30 
  -6  -4   1  769.12   27.40 
  -6  -4   1  727.63   26.60 
  -6  -4   1  774.62   26.80 
   5   4  -1  637.44   23.30 
   5   4  -1  645.94   21.50 
   5   4  -1  611.24   22.50 
   5   4  -1  600.04   21.40 
   5   4  -1  621.34   22.90 
   5   4  -1  606.44   22.10 
   5   4  -1  610.34   22.10 
  -5  -4   1  646.24   28.40 
  -5  -4   1  640.74   22.80 
  -5  -4   1  628.64   22.30 
  -5  -4   1  609.34   22.00 
   4   4  -1  332.67   12.30 
   4   4  -1  334.37   13.20 
   4   4  -1  338.57   12.50 
   4   4  -1  320.77   11.70 
   4   4  -1  318.87   12.50 
   4   4  -1  337.37   11.60 
  -4  -4   1  332.17   14.30 
  -4  -4   1  346.77   12.40 
  -4  -4   1  340.07   12.70 
   3   4  -1  525.45   18.30 
   3   4  -1  517.85   18.30 
   3   4  -1  512.75   17.70 
   3   4  -1  535.15   19.20 
  -3  -4   1  507.25   18.00 
  -3  -4   1  476.15   18.40 
  -3  -4   1  524.05   18.20 
  -3  -4   1  510.85   19.80 
  -3  -4   1  525.15   17.60 
   2   4  -1 1380.56   47.90 
   2   4  -1 1459.95   48.10 
   2   4  -1 1404.16   48.90 
  -2  -4   1 1435.96   47.60 
  -2  -4   1 1424.76   48.00 
  -2  -4   1 1366.36   48.40 
   1   4  -1 1028.00   36.50 
   1   4  -1 1054.19   35.70 
   1   4  -1 1102.89   41.70 
   1   4  -1 1009.60   35.90 
  -1  -4   1 1054.09   35.80 
  -1  -4   1 1001.20   36.20 
  -1  -4   1 1035.90   35.30 
   0   4  -1  224.98    8.40 
   0   4  -1  212.08    8.40 
   0   4  -1  215.08    8.70 
   0   4  -1  226.58    9.20 
   0  -4   1  210.38    9.00 
   0  -4   1  228.38    8.10 
   0  -4   1  225.88    8.60 
  -1   4  -1   69.09    3.10 
  -1   4  -1   72.69    3.60 
  -1   4  -1   75.39    3.70 
  -1   4  -1   79.39    4.20 
  -1   4  -1   74.09    8.10 
  -1   4  -1   80.89    4.50 
  -1   4  -1   78.09    3.70 
   1  -4   1   79.69    3.90 
   1  -4   1   77.89    4.20 
   1  -4   1   79.19    4.40 
   1  -4   1   77.99    3.40 
  -2   4  -1  293.47   18.00 
  -2   4  -1  333.17   13.60 
  -2   4  -1  350.46   12.50 
  -2   4  -1  358.66   13.50 
  -2   4  -1  339.67   12.70 
   2  -4   1  367.46   13.10 
   2  -4   1  336.17   13.10 
   2  -4   1  323.17   13.30 
   2  -4   1  362.26   13.90 
  -3   4  -1  732.73   25.10 
  -3   4  -1  650.63   24.90 
  -3   4  -1  668.03   23.40 
  -3   4  -1  668.23   23.50 
  -3   4  -1  662.93   23.90 
  -3   4  -1  647.74   30.70 
  -3   4  -1  669.63   24.00 
   3  -4   1  659.93   24.10 
   3  -4   1  639.44   23.40 
   3  -4   1  693.33   24.50 
   3  -4   1  646.04   23.40 
   3  -4   1  674.43   25.10 
   3  -4   1  666.13   24.10 
  -4   4  -1  575.24   21.20 
  -4   4  -1  612.04   22.00 
  -4   4  -1  630.04   23.10 
  -4   4  -1  565.04   21.80 
  -4   4  -1  609.84   21.20 
   4  -4   1  589.94   22.10 
   4  -4   1  603.64   21.30 
   4  -4   1  616.14   22.50 
   4  -4   1  581.24   21.20 
  -5   4  -1  372.06   14.80 
  -5   4  -1  361.96   14.10 
  -5   4  -1  407.56   15.20 
  -5   4  -1  395.86   16.10 
  -5   4  -1  389.96   14.20 
   5  -4   1  363.86   14.20 
   5  -4   1  396.96   15.20 
   5  -4   1  406.96   14.40 
   5  -4   1  398.06   15.50 
  -6   4  -1  220.68    8.80 
  -6   4  -1  245.98    9.80 
  -6   4  -1  227.68    9.60 
   6  -4   1  244.88   10.00 
   6  -4   1  235.08   10.00 
   6  -4   1  242.18    9.10 
  -7   4  -1   45.20    2.60 
  -7   4  -1   39.90    2.50 
   7  -4   1   37.80    2.70 
   7  -4   1   37.00    2.30 
  10   3  -1   78.29    3.50 
  10   3  -1   99.89    4.10 
 -10  -3   1   75.79    3.70 
 -10  -3   1   75.79    3.70 
 -10  -3   1   79.59    3.70 
   9   3  -1   39.00    2.60 
   9   3  -1   39.40    2.70 
   9   3  -1   39.30    2.60 
  -9  -3   1   41.50    3.10 
  -9  -3   1   39.90    2.70 
  -9  -3   1   36.30    2.70 
   8   3  -1   70.09    3.80 
   8   3  -1   70.29    3.70 
   8   3  -1   67.89    4.50 
   8   3  -1   69.99    3.90 
  -8  -3   1   73.29    4.50 
  -8  -3   1   69.79    4.00 
  -8  -3   1   77.59    4.60 
  -8  -3   1   73.39    4.00 
  -8  -3   1   66.69    4.20 
   7   3  -1   38.90    2.70 
   7   3  -1   37.60    2.40 
   7   3  -1   37.90    2.60 
   7   3  -1   36.40    3.80 
   7   3  -1   38.80    3.20 
   7   3  -1   35.50    2.10 
  -7  -3   1   39.10    2.80 
  -7  -3   1   34.30    2.60 
  -7  -3   1   38.30    3.00 
  -7  -3   1   37.30    3.30 
  -7  -3   1   36.10    2.80 
  -7  -3   1   35.90    3.10 
   6   3  -1   40.50    2.30 
   6   3  -1   47.50    3.20 
   6   3  -1   47.30    2.70 
   6   3  -1   41.20    2.20 
   6   3  -1   44.70    3.80 
   6   3  -1   41.50    2.40 
  -6  -3   1   45.00    3.40 
  -6  -3   1   41.10    2.90 
  -6  -3   1   37.30    2.70 
  -6  -3   1   49.20    3.10 
  -6  -3   1   42.10    2.70 
  -6  -3   1   41.30    2.70 
   5   3  -1  141.39    6.90 
   5   3  -1  147.79    5.50 
   5   3  -1  143.29    6.40 
   5   3  -1  151.58    7.10 
   5   3  -1  139.69    5.50 
   5   3  -1  137.39    6.00 
   5   3  -1  146.39    6.30 
  -5  -3   1  140.49    8.40 
  -5  -3   1  152.08    6.30 
  -5  -3   1  154.08    6.70 
   4   3  -1  352.06   13.20 
   4   3  -1  351.26   12.10 
   4   3  -1  338.57   12.60 
   4   3  -1  347.07   12.10 
   4   3  -1  364.46   12.90 
   4   3  -1  338.77   13.40 
   4   3  -1  342.37   12.60 
  -4  -3   1  355.06   13.00 
  -4  -3   1  336.17   14.60 
  -4  -3   1  343.67   12.70 
   3   3  -1  108.39    4.70 
   3   3  -1  101.89    4.50 
   3   3  -1  115.19    4.60 
   3   3  -1  116.19    5.20 
   3   3  -1  108.99    4.00 
   3   3  -1  112.79    4.60 
  -3  -3   1  110.79    5.80 
  -3  -3   1  109.49    3.90 
  -3  -3   1  107.69    4.30 
  -3  -3   1  104.49    4.20 
  -3  -3   1  104.89    4.50 
  -3  -3   1  110.49    4.80 
   2   3  -1 4820.82  167.68 
   2   3  -1 4490.85  163.88 
   2   3  -1 4901.51  166.48 
   2   3  -1 4694.73  163.18 
   2   3  -1 5099.39  165.38 
   2   3  -1 5215.68  164.38 
  -2  -3   1 4883.51  164.08 
  -2  -3   1 4794.02  164.28 
  -2  -3   1 4895.81  165.18 
  -2  -3   1 5060.19  170.18 
   1   3  -1 3384.16  111.49 
   1   3  -1 3305.37  112.49 
   1   3  -1 3201.68  111.99 
  -1  -3   1 3132.89  111.79 
  -1  -3   1 3335.47  113.09 
  -1  -3   1 3592.54  112.19 
   0   3  -1 1911.61   65.19 
   0   3  -1 1952.90   64.59 
   0   3  -1 1875.51   64.89 
   0   3  -1 2159.08   69.59 
   0   3  -1 1844.42   67.09 
   0  -3   1 2004.80   64.39 
   0  -3   1 1908.41   64.69 
   0  -3   1 1844.22   65.09 
   0  -3   1 1761.02   64.19 
  -1   3  -1  995.80   35.20 
  -1   3  -1 1068.49   40.10 
  -1   3  -1 1055.19   35.60 
  -1   3  -1 1042.50   34.90 
  -1   3  -1 1021.60   35.00 
  -1   3  -1  957.40   34.90 
   1  -3   1 1028.60   34.60 
   1  -3   1 1016.00   35.50 
   1  -3   1 1045.70   35.00 
   1  -3   1 1040.30   35.30 
   1  -3   1  954.70   34.20 
  -2   3  -1  659.03   23.10 
  -2   3  -1  672.73   23.80 
  -2   3  -1  635.84   23.00 
  -2   3  -1  622.24   28.20 
  -2   3  -1  660.73   23.30 
  -2   3  -1  660.23   23.90 
  -2   3  -1  679.33   23.40 
   2  -3   1  713.13   23.50 
   2  -3   1  680.33   24.10 
   2  -3   1  664.23   23.70 
  -3   3  -1  177.98   11.40 
  -3   3  -1  167.78    7.20 
  -3   3  -1  171.18    6.80 
  -3   3  -1  176.98    7.60 
  -3   3  -1  165.18    7.10 
  -3   3  -1  169.58    7.60 
   3  -3   1  163.48    7.30 
   3  -3   1  160.38    7.60 
   3  -3   1  167.98    7.00 
  -4   3  -1  233.08    8.80 
  -4   3  -1  230.38    9.40 
  -4   3  -1  224.38    9.10 
  -4   3  -1  218.28    8.80 
  -4   3  -1  247.18   10.30 
  -4   3  -1  231.28    9.50 
   4  -3   1  230.08    9.50 
   4  -3   1  227.68    9.70 
   4  -3   1  232.28    8.90 
  -5   3  -1    9.70    1.80 
  -5   3  -1    8.50    1.30 
  -5   3  -1    8.70    1.80 
  -5   3  -1   13.90    2.80 
  -5   3  -1    9.20    1.60 
   5  -3   1   10.40    2.10 
   5  -3   1    8.10    1.80 
   5  -3   1    8.80    1.50 
  -6   3  -1   29.00    2.70 
  -6   3  -1   23.50    3.20 
  -6   3  -1   22.90    2.40 
  -6   3  -1   24.50    2.60 
  -6   3  -1   26.10    2.00 
   6  -3   1   24.20    2.40 
   6  -3   1   28.10    2.20 
   6  -3   1   28.80    2.80 
   6  -3   1   23.60    2.80 
  -7   3  -1  142.19    6.40 
  -7   3  -1  141.59    6.20 
  -7   3  -1  143.59    6.40 
   7  -3   1  140.99    6.60 
   7  -3   1  149.39    6.00 
   7  -3   1  128.69    6.40 
   9   2  -1   73.69    3.60 
   9   2  -1   72.69    3.50 
   9   2  -1   69.19    3.70 
  -9  -2   1   73.19    3.70 
  -9  -2   1   70.89    3.90 
  -9  -2   1   71.19    4.10 
  -9  -2   1   70.99    3.70 
   8   2  -1   95.89    4.50 
   8   2  -1   95.29    4.60 
   8   2  -1   87.79    4.40 
   8   2  -1   86.19    5.20 
  -8  -2   1   96.59    4.70 
  -8  -2   1   85.19    4.90 
  -8  -2   1   92.79    4.90 
  -8  -2   1   95.99    5.10 
   7   2  -1  230.78    8.80 
   7   2  -1  219.98    8.70 
   7   2  -1  219.48   10.80 
   7   2  -1  227.28    9.70 
   7   2  -1  228.98    8.70 
   7   2  -1  205.98    8.00 
  -7  -2   1  214.98    9.30 
  -7  -2   1  222.28    8.90 
  -7  -2   1  210.98    9.20 
  -7  -2   1  213.18    9.80 
  -7  -2   1  220.28    9.20 
   6   2  -1 1175.58   40.60 
   6   2  -1 1267.57   42.80 
   6   2  -1 1201.98   40.00 
   6   2  -1 1164.48   40.20 
   6   2  -1 1165.68   40.40 
   6   2  -1 1190.28   40.40 
   6   2  -1 1309.37   41.70 
  -6  -2   1 1222.28   41.20 
  -6  -2   1 1128.39   40.90 
  -6  -2   1 1180.58   41.10 
  -6  -2   1 1175.58   40.70 
  -6  -2   1 1215.98   41.80 
  -6  -2   1 1156.78   41.80 
  -6  -2   1 1142.69   40.60 
  -6  -2   1 1024.80   41.00 
   5   2  -1  844.52   30.80 
   5   2  -1  868.01   31.30 
   5   2  -1  932.91   31.30 
   5   2  -1  897.91   30.40 
   5   2  -1  844.02   30.30 
   5   2  -1  920.71   32.20 
  -5  -2   1  934.51   31.60 
  -5  -2   1  826.92   34.10 
  -5  -2   1  920.51   31.10 
  -5  -2   1  916.81   31.70 
   4   2  -1 3206.88  109.99 
   4   2  -1 3321.67  110.19 
   4   2  -1 3170.08  109.79 
   4   2  -1 3356.06  110.69 
   4   2  -1 3308.97  109.39 
  -4  -2   1 3202.68  109.89 
  -4  -2   1 3336.57  110.39 
  -4  -2   1 3250.77  110.29 
  -4  -2   1 3265.97  112.49 
   3   2  -1 1416.36   45.50 
   3   2  -1 1406.46   45.90 
   3   2  -1 1367.76   46.40 
   3   2  -1 1302.07   45.90 
   3   2  -1 1403.66   46.10 
  -3  -2   1 1384.66   46.30 
  -3  -2   1 1310.27   45.90 
  -3  -2   1 1374.96   46.20 
  -3  -2   1 1411.96   47.80 
  -3  -2   1 1274.97   45.40 
  -3  -2   1 1255.77   45.40 
   2   2  -1  904.01   32.60 
   2   2  -1  966.80   32.10 
   2   2  -1 1021.70   32.60 
   2   2  -1 1000.70   32.60 
  -2  -2   1  905.71   32.30 
  -2  -2   1  943.91   32.70 
  -2  -2   1  992.60   33.80 
  -2  -2   1  931.31   32.10 
   1   2  -1 2302.87   75.89 
   1   2  -1 2179.08   75.09 
   1   2  -1 2145.19   75.59 
   1   2  -1 2238.88   75.19 
  -1  -2   1 2167.98   75.49 
  -1  -2   1 2305.27   75.39 
  -1  -2   1 2372.06   80.69 
   0   2  -1   53.59    2.40 
   0   2  -1   50.09    2.70 
   0  -2   1   52.59    2.10 
   0  -2   1   49.99    2.40 
   0  -2   1   50.99    1.90 
   0  -2   1   53.69    2.20 
  -1   2  -1 6890.71  237.68 
  -1   2  -1 6737.63  236.08 
  -1   2  -1 7264.27  236.18 
  -1   2  -1 6624.04  235.48 
  -1   2  -1 7205.58  236.28 
   1  -2   1 7293.67  235.78 
   1  -2   1 6960.90  234.08 
   1  -2   1 7293.87  236.18 
   1  -2   1 7169.68  234.28 
   1  -2   1 6662.53  235.78 
   1  -2   1 6972.00  233.78 
   1  -2   1 6848.31  235.78 
  -2   2  -1 1187.18   41.80 
  -2   2  -1 1214.08   42.30 
  -2   2  -1 1268.37   42.10 
  -2   2  -1 1173.48   45.60 
  -2   2  -1 1259.07   41.80 
  -2   2  -1 1232.58   42.10 
  -2   2  -1 1223.28   42.30 
   2  -2   1 1223.18   42.50 
   2  -2   1 1202.88   41.50 
   2  -2   1 1217.98   42.20 
   2  -2   1 1292.97   42.30 
   2  -2   1 1298.57   42.10 
   2  -2   1 1251.97   41.40 
  -3   2  -1  153.78    6.70 
  -3   2  -1  163.88    6.60 
  -3   2  -1  162.18    6.80 
  -3   2  -1  153.78    6.20 
  -3   2  -1  150.08    9.40 
  -3   2  -1  159.08    6.50 
   3  -2   1  153.78    6.30 
   3  -2   1  153.28    6.20 
   3  -2   1  158.88    6.70 
   3  -2   1  162.48    6.60 
   3  -2   1  156.08    5.70 
   3  -2   1  149.09    6.80 
  -4   2  -1   13.20    1.70 
  -4   2  -1    9.40    1.90 
  -4   2  -1    9.20    1.40 
  -4   2  -1   10.40    1.60 
  -4   2  -1    9.20    1.50 
   4  -2   1   11.60    1.10 
   4  -2   1   12.30    1.70 
   4  -2   1   11.40    2.00 
   4  -2   1   10.40    1.30 
  -5   2  -1  109.89    4.70 
  -5   2  -1  131.59    8.20 
  -5   2  -1  115.59    5.50 
  -5   2  -1  102.09    5.20 
  -5   2  -1  105.59    5.10 
  -5   2  -1  103.09    5.50 
  -5   2  -1  114.09    6.10 
  -5   2  -1   98.79    5.10 
   5  -2   1   98.59    5.20 
   5  -2   1  101.19    5.90 
   5  -2   1  106.99    5.20 
   5  -2   1  101.59    5.50 
   5  -2   1  102.89    4.80 
   5  -2   1  111.89    4.80 
  -6   2  -1  144.69    6.90 
  -6   2  -1  154.18    6.80 
  -6   2  -1  142.39    7.60 
  -6   2  -1  147.39    6.90 
  -6   2  -1  144.19    6.10 
   6  -2   1  156.68    6.40 
   6  -2   1  142.09    6.20 
   6  -2   1  141.39    7.00 
   6  -2   1  148.89    7.00 
  -7   2  -1  141.19    6.50 
  -7   2  -1  140.39    6.40 
  -7   2  -1  126.89    5.60 
  -7   2  -1  146.89    6.60 
   7  -2   1  146.99    6.10 
   7  -2   1  132.49    6.60 
   7  -2   1  132.69    6.60 
  -8   2  -1   -0.20    1.10 
  -8   2  -1   -0.10    0.80 
  -8   2  -1   -1.00    0.90 
   8  -2   1    0.50    0.90 
   8  -2   1    1.00    1.30 
   9   1  -1   52.39    3.00 
   9   1  -1   52.69    2.90 
  -9  -1   1   53.79    3.00 
  -9  -1   1   50.49    3.20 
  -9  -1   1   46.20    2.70 
  -9  -1   1   60.09    3.30 
   8   1  -1   16.00    1.80 
   8   1  -1   19.00    2.70 
   8   1  -1   15.00    1.60 
   8   1  -1   15.50    2.00 
  -8  -1   1   17.30    2.40 
  -8  -1   1   19.30    2.40 
  -8  -1   1   14.00    2.10 
  -8  -1   1   14.00    1.80 
   7   1  -1   40.00    4.10 
   7   1  -1   41.00    3.40 
   7   1  -1   45.30    2.80 
   7   1  -1   44.50    3.00 
   7   1  -1   40.40    2.60 
  -7  -1   1   42.90    3.30 
  -7  -1   1   40.70    3.30 
  -7  -1   1   45.50    3.30 
  -7  -1   1   40.30    2.90 
  -7  -1   1   40.30    3.50 
   6   1  -1  134.59    5.50 
   6   1  -1  129.49    7.20 
   6   1  -1  136.49    5.60 
   6   1  -1  121.29    5.40 
   6   1  -1  136.19    6.40 
   6   1  -1  127.69    5.00 
   6   1  -1  125.09    5.30 
  -6  -1   1  126.19    6.50 
  -6  -1   1  126.39    5.70 
  -6  -1   1  130.79    6.00 
  -6  -1   1  122.79    5.90 
  -6  -1   1  132.89    6.50 
  -6  -1   1  138.79    6.10 
   5   1  -1   31.30    2.30 
   5   1  -1   31.90    2.50 
   5   1  -1   30.00    1.70 
   5   1  -1   31.20    3.00 
   5   1  -1   32.40    1.80 
  -5  -1   1   29.70    2.60 
  -5  -1   1   33.10    2.60 
  -5  -1   1   32.70    2.30 
  -5  -1   1   32.90    2.80 
  -5  -1   1   29.90    3.80 
   4   1  -1 2222.68   76.39 
   4   1  -1 2232.38   75.69 
   4   1  -1 2247.08   74.99 
   4   1  -1 2185.78   75.59 
  -4  -1   1 2287.77   75.89 
  -4  -1   1 2296.57   75.89 
  -4  -1   1 2239.68   75.89 
  -4  -1   1 2230.48   75.49 
  -4  -1   1 2174.28   78.19 
   3   1  -1 3348.26  111.79 
   3   1  -1 3353.06  112.19 
   3   1  -1 3430.66  111.69 
   3   1  -1 3252.87  111.69 
  -3  -1   1 3218.88  111.59 
  -3  -1   1 3360.26  111.89 
  -3  -1   1 3299.97  111.89 
  -3  -1   1 3428.46  116.09 
  -3  -1   1 3277.47  111.89 
   2   1  -1 1817.12   60.39 
   2   1  -1 1865.61   60.69 
   2   1  -1 1748.43   60.89 
  -2  -1   1 1822.32   61.89 
  -2  -1   1 1827.02   60.79 
  -2  -1   1 1749.32   60.69 
   1   1  -1  533.45   21.60 
   1   1  -1  616.44   20.80 
   1   1  -1  643.04   21.00 
   1   1  -1  656.53   21.00 
  -1  -1   1  602.54   21.00 
  -1  -1   1  608.24   21.10 
  -1  -1   1  636.44   20.90 
  -1  -1   1  642.94   21.80 
  -1  -1   1  614.94   20.70 
   0   1  -1 1668.13   54.89 
   0   1  -1 1570.94   54.99 
   0  -1   1 1609.04   54.99 
   0  -1   1 1591.24   54.89 
   0  -1   1 1650.53   55.79 
  -1   1  -1 6779.62  226.08 
  -1   1  -1 6720.13  227.08 
  -1   1  -1 6477.95  227.18 
  -1   1  -1 6484.35  226.58 
   1  -1   1 6883.11  235.88 
   1  -1   1 6847.81  225.78 
   1  -1   1 6975.20  227.88 
   1  -1   1 6451.65  226.58 
   1  -1   1 6919.31  224.88 
  -2   1  -1  410.76   13.80 
  -2   1  -1  405.26   13.40 
  -2   1  -1  374.66   13.70 
  -2   1  -1  373.86   13.80 
  -2   1  -1  385.66   13.70 
   2  -1   1  378.06   13.20 
   2  -1   1  382.96   13.60 
   2  -1   1  393.66   13.30 
   2  -1   1  368.26   13.80 
   2  -1   1  402.06   13.30 
   2  -1   1  409.06   13.80 
  -3   1  -1  572.64   19.90 
  -3   1  -1  544.65   19.50 
  -3   1  -1  568.84   19.80 
  -3   1  -1  560.94   19.80 
   3  -1   1  556.14   19.50 
   3  -1   1  549.95   19.30 
   3  -1   1  567.94   19.60 
   3  -1   1  520.15   19.80 
   3  -1   1  572.14   20.10 
   3  -1   1  582.74   19.10 
  -4   1  -1  732.93   25.90 
  -4   1  -1  721.03   25.70 
  -4   1  -1  700.63   25.30 
  -4   1  -1  730.53   25.70 
   4  -1   1  742.53   26.20 
   4  -1   1  718.23   25.40 
   4  -1   1  728.93   24.80 
  -5   1  -1  725.73   27.00 
  -5   1  -1  782.02   27.00 
  -5   1  -1  751.22   27.50 
  -5   1  -1  775.52   27.50 
  -5   1  -1  823.22   27.80 
  -5   1  -1  747.53   27.00 
  -5   1  -1  748.73   27.10 
  -5   1  -1  764.62   26.50 
   5  -1   1  774.72   26.50 
   5  -1   1  775.62   26.60 
   5  -1   1  799.22   27.20 
   5  -1   1  759.22   26.30 
   5  -1   1  732.43   26.40 
   5  -1   1  737.03   27.20 
   5  -1   1  780.02   28.20 
   5  -1   1  741.53   27.00 
  -6   1  -1  162.98    7.50 
  -6   1  -1  172.28    6.80 
  -6   1  -1  168.28    8.20 
  -6   1  -1  168.88    7.40 
  -6   1  -1  174.88    7.60 
  -6   1  -1  161.38    7.30 
  -6   1  -1  163.58    7.80 
   6  -1   1  163.98    7.60 
   6  -1   1  170.18    7.50 
   6  -1   1  159.88    6.70 
   6  -1   1  168.08    6.90 
   6  -1   1  165.28    7.60 
   6  -1   1  180.58    7.00 
   6  -1   1  169.58    8.60 
  -7   1  -1   11.20    2.00 
  -7   1  -1   11.90    1.80 
  -7   1  -1   10.20    1.80 
  -7   1  -1   14.40    2.20 
  -7   1  -1   11.00    1.40 
  -7   1  -1   11.30    2.30 
   7  -1   1   12.60    1.60 
   7  -1   1   12.90    2.10 
   7  -1   1   11.20    1.80 
   7  -1   1   14.20    2.20 
   7  -1   1   10.70    2.10 
  -8   1  -1   67.09    3.90 
  -8   1  -1   77.69    4.30 
  -8   1  -1   77.49    4.30 
   8  -1   1   72.69    4.40 
   8  -1   1   73.49    3.80 
  -9   1  -1  197.18    7.90 
  -9   1  -1  208.88    8.30 
   9  -1   1  206.28    7.70 
   9   0  -1   55.39    2.80 
   9   0  -1   57.29    2.90 
  -9   0   1   57.59    3.20 
  -9   0   1   57.19    3.10 
   8   0  -1   64.19    3.40 
   8   0  -1   51.19    5.10 
   8   0  -1   68.49    3.70 
  -8   0   1   61.69    3.50 
  -8   0   1   72.89    4.20 
  -8   0   1   72.09    4.10 
  -8   0   1   66.19    3.40 
   7   0  -1    5.50    1.90 
   7   0  -1    4.60    1.30 
   7   0  -1    5.20    1.20 
   7   0  -1    4.10    1.70 
   7   0  -1    2.70    2.70 
  -7   0   1    5.60    1.70 
  -7   0   1    5.10    1.40 
  -7   0   1    5.60    1.60 
  -7   0   1    2.70    1.10 
   6   0  -1  159.38    7.30 
   6   0  -1  148.89    5.80 
   6   0  -1  154.18    8.30 
   6   0  -1  158.28    6.40 
   6   0  -1  156.58    6.50 
   6   0  -1  139.89    6.50 
  -6   0   1  152.98    7.30 
  -6   0   1  153.98    6.90 
  -6   0   1  147.69    7.30 
  -6   0   1  153.18    6.80 
  -6   0   1  161.98    7.70 
  -6   0   1  158.98    6.90 
  -6   0   1  151.48    6.40 
   5   0  -1   15.80    2.50 
   5   0  -1   13.80    1.30 
   5   0  -1   15.00    1.40 
   5   0  -1   17.70    2.20 
   5   0  -1   17.90    1.70 
   5   0  -1   14.80    1.30 
   5   0  -1   17.50    1.40 
   5   0  -1   16.80    1.70 
  -5   0   1   16.00    1.70 
  -5   0   1   16.70    1.70 
  -5   0   1   24.70    2.40 
  -5   0   1   18.80    2.30 
  -5   0   1   15.50    1.90 
  -5   0   1   19.70    2.30 
   4   0  -1  745.63   25.60 
   4   0  -1  759.42   26.40 
   4   0  -1  766.52   24.90 
   4   0  -1  710.93   25.40 
   4   0  -1  705.53   24.80 
  -4   0   1  726.53   25.70 
  -4   0   1  712.63   25.80 
  -4   0   1  717.53   28.30 
  -4   0   1  729.73   25.70 
  -4   0   1  700.73   25.30 
   3   0  -1  723.33   24.40 
   3   0  -1  726.13   25.40 
   3   0  -1  712.13   24.90 
   3   0  -1  732.53   24.80 
  -3   0   1  748.63   25.00 
  -3   0   1  683.43   25.00 
  -3   0   1  732.33   25.00 
  -3   0   1  688.43   24.70 
   2   0  -1 1677.63   57.79 
   2   0  -1 1726.73   57.29 
   2   0  -1 1642.14   57.89 
   2   0  -1 1778.12   57.59 
  -2   0   1 1760.02   57.69 
  -2   0   1 1687.53   57.69 
   1   0  -1 1354.26   43.90 
   1   0  -1 1265.17   43.40 
   1   0  -1 1284.17   43.40 
   1   0  -1 1205.68   43.70 
  -1   0   1 1384.36   45.40 
  -1   0   1 1355.96   44.20 
  -1   0   1 1217.38   43.50 
   0   0  -1   -9.40    0.50 
   0   0  -1   -7.30    0.40 
   0   0  -1   -8.30    0.40 
   0   0   1   -8.00    0.40 
   0   0   1   -7.80    0.60 
   0   0   1   -8.60    0.40 
  -1   0  -1  374.66   12.80 
  -1   0  -1  362.06   12.90 
  -1   0  -1  349.87   12.70 
  -1   0  -1  358.96   13.00 
   1   0   1  386.86   13.00 
   1   0   1  386.66   12.80 
   1   0   1  369.26   12.70 
  -2   0  -1  197.18    7.30 
  -2   0  -1  204.88    7.30 
  -2   0  -1  185.58    7.00 
   2   0   1  208.78    7.20 
   2   0   1  207.58    7.10 
   2   0   1  200.48    6.90 
   2   0   1  196.88    7.50 
  -3   0  -1  334.17   11.80 
  -3   0  -1  325.07   11.80 
  -3   0  -1  308.07   11.70 
  -3   0  -1  312.17   11.50 
   3   0   1  334.47   11.20 
   3   0   1  332.07   12.10 
   3   0   1  328.17   11.50 
   3   0   1  315.67   11.60 
   3   0   1  325.57   11.50 
  -4   0  -1  253.37    9.80 
  -4   0  -1  248.28    9.40 
  -4   0  -1  260.07    9.80 
  -4   0  -1  246.08    9.80 
   4   0   1  244.68    9.30 
   4   0   1  254.07    9.60 
   4   0   1  253.97    9.00 
   4   0   1  254.77   10.20 
  -5   0  -1   22.60    2.00 
  -5   0  -1   20.60    2.20 
  -5   0  -1   23.50    2.30 
  -5   0  -1   17.90    2.10 
   5   0   1   20.70    2.00 
   5   0   1   22.00    1.50 
   5   0   1   22.60    2.50 
  -6   0  -1  107.29    5.70 
  -6   0  -1   97.59    5.10 
  -6   0  -1  100.49    5.70 
  -6   0  -1   97.79    4.60 
  -6   0  -1  106.09    5.20 
  -6   0  -1  103.89    4.60 
  -6   0  -1  113.09    5.30 
  -6   0  -1  104.99    5.70 
  -6   0  -1  113.09    5.40 
   6   0   1  112.19    5.50 
   6   0   1  102.39    5.20 
   6   0   1  107.59    4.50 
   6   0   1  110.39    4.70 
   6   0   1  106.09    6.30 
   6   0   1  104.39    4.60 
   6   0   1   94.89    5.30 
   6   0   1  113.49    4.80 
  -7   0  -1  162.48    7.30 
  -7   0  -1  145.29    7.60 
  -7   0  -1  163.18    7.30 
  -7   0  -1  152.38    7.20 
  -7   0  -1  157.28    7.90 
  -7   0  -1  164.08    7.10 
  -7   0  -1  160.58    6.50 
   7   0   1  162.88    7.60 
   7   0   1  158.48    7.40 
   7   0   1  166.98    6.80 
   7   0   1  156.18    8.50 
   7   0   1  157.28    6.60 
   7   0   1  159.48    6.60 
  -8   0  -1   78.19    4.60 
  -8   0  -1   93.69    4.90 
  -8   0  -1   87.49    4.90 
   8   0   1   81.89    4.90 
   8   0   1   74.29    4.60 
   8   0   1   88.19    4.30 
   8   0   1   83.59    4.80 
   8   0   1   87.59    4.10 
  -9   0  -1  162.78    6.90 
  -9   0  -1  169.08    7.00 
   9   0   1  152.98    7.00 
   9   0   1  169.78    6.60 
   8  -1  -1   81.29    3.90 
   8  -1  -1   75.99    4.30 
   8  -1  -1   77.99    3.80 
  -8   1   1   83.69    4.40 
  -8   1   1   80.19    4.30 
   7  -1  -1    7.80    1.50 
   7  -1  -1    9.00    2.00 
   7  -1  -1    7.90    1.90 
   7  -1  -1    7.20    1.40 
  -7   1   1    6.60    1.40 
  -7   1   1   10.10    2.00 
  -7   1   1    9.10    2.20 
  -7   1   1    9.90    1.90 
  -7   1   1    5.60    1.20 
   6  -1  -1   83.29    4.10 
   6  -1  -1   84.09    5.10 
   6  -1  -1   78.39    4.10 
   6  -1  -1   87.59    5.00 
   6  -1  -1   78.79    5.60 
  -6   1   1   89.59    4.70 
  -6   1   1   80.29    4.40 
  -6   1   1   82.39    5.30 
  -6   1   1   89.29    4.70 
  -6   1   1   76.69    3.90 
   5  -1  -1  271.57   10.50 
   5  -1  -1  243.38    9.50 
   5  -1  -1  258.47   11.30 
   5  -1  -1  259.97    9.60 
   5  -1  -1  236.78    9.00 
   5  -1  -1  252.27    9.40 
  -5   1   1  249.78   10.00 
  -5   1   1  250.27    9.90 
  -5   1   1  266.37   10.90 
  -5   1   1  248.48   10.40 
  -5   1   1  242.98    9.50 
  -5   1   1  253.87   10.10 
  -5   1   1  252.77   10.30 
  -5   1   1  254.27   10.00 
   4  -1  -1  599.74   21.40 
   4  -1  -1  607.64   20.60 
   4  -1  -1  539.65   20.30 
   4  -1  -1  515.55   19.60 
   4  -1  -1  588.24   19.80 
  -4   1   1  578.14   20.60 
  -4   1   1  571.74   20.60 
  -4   1   1  568.34   20.20 
  -4   1   1  576.24   20.90 
   3  -1  -1  153.28    6.60 
   3  -1  -1  144.09    6.20 
   3  -1  -1  156.48    5.60 
   3  -1  -1  149.09    6.00 
   3  -1  -1  146.59    5.90 
  -3   1   1  142.59    9.10 
  -3   1   1  151.38    6.10 
  -3   1   1  151.28    6.30 
  -3   1   1  156.98    6.10 
  -3   1   1  149.39    5.80 
   2  -1  -1   28.40    1.40 
   2  -1  -1   30.30    1.60 
   2  -1  -1   30.10    1.40 
   2  -1  -1   28.70    2.00 
   2  -1  -1   29.20    1.30 
   2  -1  -1   27.30    1.60 
  -2   1   1   27.40    1.90 
  -2   1   1   27.70    1.70 
  -2   1   1   30.60    1.80 
   1  -1  -1 1866.21   60.79 
   1  -1  -1 1842.82   60.99 
   1  -1  -1 1890.11   61.59 
   1  -1  -1 1717.43   60.89 
   1  -1  -1 1781.42   61.09 
  -1   1   1 1793.82   60.69 
  -1   1   1 1790.22   61.09 
   0  -1  -1  987.60   33.20 
   0  -1  -1  985.40   33.10 
   0   1   1  973.40   33.30 
   0   1   1  978.60   33.20 
   0   1   1 1006.70   33.20 
  -1  -1  -1 4675.53  150.78 
  -1  -1  -1 4641.14  150.08 
   1   1   1 4210.18  150.08 
   1   1   1 4402.76  150.38 
   1   1   1 4455.05  149.88 
  -2  -1  -1 9043.10  307.07 
  -2  -1  -1 9999.00  308.67 
  -2  -1  -1 9554.34  308.07 
   2   1   1 8906.61  305.97 
   2   1   1 8925.81  309.17 
   2   1   1 9227.88  307.47 
   2   1   1 8367.26  305.87 
  -3  -1  -1  373.76   13.90 
  -3  -1  -1  415.56   14.50 
  -3  -1  -1  396.36   14.20 
  -3  -1  -1  423.86   14.50 
   3   1   1  411.26   14.70 
   3   1   1  420.36   14.30 
   3   1   1  392.06   14.30 
   3   1   1  421.86   13.90 
  -4  -1  -1 2378.46   78.79 
  -4  -1  -1 2393.56   78.79 
  -4  -1  -1 2260.07   78.39 
  -4  -1  -1 2182.68   78.49 
   4   1   1 2334.17   78.39 
   4   1   1 2356.26   79.19 
   4   1   1 2297.47   78.49 
   4   1   1 2400.36   77.99 
  -5  -1  -1 2730.83   95.19 
  -5  -1  -1 2789.62   95.39 
  -5  -1  -1 2890.71   94.99 
  -5  -1  -1 2903.81   95.39 
   5   1   1 2802.62   94.29 
   5   1   1 2913.21   96.09 
   5   1   1 2836.82   95.19 
   5   1   1 2625.24   94.89 
  -6  -1  -1   51.89    3.20 
  -6  -1  -1   49.00    3.60 
  -6  -1  -1   51.19    3.30 
  -6  -1  -1   49.50    2.90 
  -6  -1  -1   54.49    3.70 
  -6  -1  -1   48.90    3.50 
  -6  -1  -1   54.09    2.80 
  -6  -1  -1   51.89    3.30 
   6   1   1   50.39    2.90 
   6   1   1   55.99    4.20 
   6   1   1   55.29    3.50 
   6   1   1   50.59    3.20 
   6   1   1   48.10    2.60 
   6   1   1   54.39    2.80 
   6   1   1   48.60    2.60 
  -7  -1  -1    7.20    1.70 
  -7  -1  -1    9.40    1.30 
  -7  -1  -1    9.00    1.80 
  -7  -1  -1    5.50    1.60 
  -7  -1  -1    6.90    1.80 
  -7  -1  -1    8.90    1.50 
   7   1   1    8.60    1.40 
   7   1   1    8.10    1.90 
   7   1   1    9.10    1.80 
   7   1   1    5.70    2.00 
   7   1   1    6.30    1.20 
   7   1   1    6.90    1.30 
  -8  -1  -1   24.00    2.60 
  -8  -1  -1   23.90    2.80 
  -8  -1  -1   25.10    2.80 
  -8  -1  -1   24.60    2.20 
   8   1   1   28.90    2.20 
   8   1   1   25.20    2.90 
   8   1   1   24.40    2.30 
   8   1   1   25.10    2.20 
   8   1   1   24.90    2.80 
  -9  -1  -1   30.30    2.70 
  -9  -1  -1   30.20    2.80 
   9   1   1   29.50    2.10 
   9   1   1   27.60    2.70 
   9   1   1   29.20    2.20 
   9   1   1   32.90    2.40 
   8  -2  -1  151.68    6.10 
   8  -2  -1  152.18    6.10 
   8  -2  -1  135.69    6.50 
  -8   2   1  163.88    6.50 
  -8   2   1  174.38    6.50 
   7  -2  -1  181.38    8.30 
   7  -2  -1  181.98    7.50 
   7  -2  -1  198.78    7.70 
  -7   2   1  192.88    8.10 
  -7   2   1  175.48    7.80 
  -7   2   1  187.78    8.00 
   6  -2  -1  176.28   11.90 
   6  -2  -1  228.08    8.80 
   6  -2  -1  222.28    9.70 
   6  -2  -1  210.98    8.60 
   6  -2  -1  212.88    9.40 
  -6   2   1  226.28    9.20 
  -6   2   1  224.58    9.20 
  -6   2   1  230.08   10.30 
  -6   2   1  204.78    9.00 
   5  -2  -1    0.70    0.60 
   5  -2  -1    0.80    0.80 
   5  -2  -1   -0.10    1.10 
   5  -2  -1    0.10    1.30 
   5  -2  -1    1.20    1.00 
   5  -2  -1    1.20    1.40 
  -5   2   1    0.40    0.90 
  -5   2   1    0.90    1.00 
  -5   2   1    1.80    1.50 
  -5   2   1    1.60    1.20 
   4  -2  -1  214.68    8.40 
   4  -2  -1  229.88    9.90 
   4  -2  -1  217.18    8.20 
   4  -2  -1  224.18    9.30 
   4  -2  -1  221.78    9.00 
   4  -2  -1  229.58    8.50 
  -4   2   1  215.98    8.80 
  -4   2   1  222.08    8.90 
  -4   2   1  230.48    9.60 
  -4   2   1  218.28    8.90 
   3  -2  -1  519.65   17.30 
   3  -2  -1  496.95   17.80 
   3  -2  -1  492.45   17.60 
   3  -2  -1  489.45   17.60 
   3  -2  -1  511.55   18.60 
  -3   2   1  498.55   17.80 
  -3   2   1  501.65   17.90 
  -3   2   1  518.05   18.40 
  -3   2   1  487.55   22.50 
  -3   2   1  479.45   17.50 
   2  -2  -1 1249.47   41.70 
   2  -2  -1 1277.07   40.70 
   2  -2  -1 1186.18   41.00 
   2  -2  -1 1129.49   41.40 
   2  -2  -1 1158.08   41.10 
   2  -2  -1 1220.68   41.00 
   2  -2  -1 1231.38   40.70 
  -2   2   1 1243.78   41.80 
  -2   2   1 1161.38   41.10 
  -2   2   1 1167.78   41.50 
  -2   2   1 1231.18   45.30 
  -2   2   1 1232.68   41.10 
   1  -2  -1  149.39    6.00 
   1  -2  -1  152.68    5.70 
   1  -2  -1  163.28    5.50 
   1  -2  -1  156.78    5.40 
  -1   2   1  154.98    5.70 
  -1   2   1  147.99    5.90 
  -1   2   1  149.39    5.60 
  -1   2   1  146.99    5.60 
  -1   2   1  155.78    6.20 
   0  -2  -1    3.80    0.50 
   0  -2  -1    3.80    0.80 
   0  -2  -1    2.30    0.50 
   0   2   1    4.70    1.10 
   0   2   1    3.40    0.50 
   0   2   1    4.50    0.70 
   0   2   1    4.20    0.80 
  -1  -2  -1  200.58    7.00 
  -1  -2  -1  193.08    7.10 
   1   2   1  195.78    7.40 
   1   2   1  200.38    7.10 
   1   2   1  206.08    7.10 
  -2  -2  -1  923.91   30.20 
  -2  -2  -1  853.51   30.10 
  -2  -2  -1  881.01   30.20 
  -2  -2  -1  927.61   30.50 
  -2  -2  -1  885.81   29.90 
   2   2   1  910.41   30.20 
   2   2   1  881.01   30.00 
   2   2   1  885.61   30.40 
   2   2   1  910.71   29.90 
   2   2   1  839.32   30.30 
  -3  -2  -1 8223.48  260.97 
  -3  -2  -1 7957.20  260.07 
  -3  -2  -1 8193.48  266.67 
  -3  -2  -1 7923.81  257.57 
  -3  -2  -1 7254.47  258.47 
  -3  -2  -1 7710.13  259.27 
   3   2   1 6778.62  259.17 
   3   2   1 7615.64  258.47 
   3   2   1 7486.95  260.57 
   3   2   1 7738.93  257.87 
   3   2   1 7375.86  260.67 
   3   2   1 8022.50  260.37 
  -4  -2  -1  116.39    4.50 
  -4  -2  -1  128.59    5.40 
  -4  -2  -1  129.09    5.50 
  -4  -2  -1  122.39    6.50 
  -4  -2  -1  125.59    5.10 
   4   2   1  123.79    5.20 
   4   2   1  129.29    4.70 
   4   2   1  126.49    5.20 
   4   2   1  117.89    4.80 
   4   2   1  127.79    5.80 
  -5  -2  -1  142.29    6.10 
  -5  -2  -1  149.39    6.50 
  -5  -2  -1  150.08    6.50 
  -5  -2  -1  140.79    8.10 
   5   2   1  145.89    6.90 
   5   2   1  146.99    6.20 
   5   2   1  142.69    6.10 
   5   2   1  146.99    5.60 
  -6  -2  -1  259.57   10.00 
  -6  -2  -1  251.67   10.20 
  -6  -2  -1  276.17   10.40 
  -6  -2  -1  275.07   10.90 
  -6  -2  -1  246.48    9.70 
  -6  -2  -1  240.08   13.90 
  -6  -2  -1  255.47   10.30 
  -6  -2  -1  259.87   10.90 
   6   2   1  279.37   10.60 
   6   2   1  272.47    9.80 
   6   2   1  251.67    9.60 
   6   2   1  247.88    9.70 
   6   2   1  272.17   11.50 
   6   2   1  262.67    9.60 
  -7  -2  -1  439.26   16.80 
  -7  -2  -1  439.46   16.70 
  -7  -2  -1  441.06   17.40 
  -7  -2  -1  445.36   16.30 
  -7  -2  -1  420.36   15.90 
  -7  -2  -1  452.55   16.90 
   7   2   1  454.55   16.20 
   7   2   1  456.05   17.20 
   7   2   1  433.06   16.00 
   7   2   1  444.26   16.70 
   7   2   1  455.85   16.20 
   7   2   1  450.25   18.30 
  -8  -2  -1  254.67   10.40 
  -8  -2  -1  248.18   10.30 
  -8  -2  -1  245.58    9.70 
  -8  -2  -1  239.18   10.30 
   8   2   1  245.78    9.70 
   8   2   1  236.88   10.30 
   8   2   1  248.88    9.70 
   8   2   1  246.68    9.60 
   8   2   1  243.08   10.60 
  -9  -2  -1   21.80    2.40 
  -9  -2  -1   22.10    2.60 
  -9  -2  -1   17.20    1.80 
   9   2   1   20.40    2.50 
   9   2   1   17.10    1.80 
   9   2   1   21.30    1.90 
   9   2   1   19.20    1.90 
 -10  -2  -1   88.19    4.20 
 -10  -2  -1   89.39    4.00 
 -10  -2  -1   91.09    4.40 
  10   2   1   95.39    4.30 
  10   2   1   89.99    3.90 
   7  -3  -1   84.89    4.70 
   7  -3  -1   83.69    4.00 
   7  -3  -1   92.79    4.10 
  -7   3   1   89.99    4.40 
  -7   3   1   92.69    4.50 
   6  -3  -1   37.60    3.50 
   6  -3  -1   36.20    2.60 
  -6   3   1   36.20    3.70 
  -6   3   1   34.80    3.10 
  -6   3   1   38.10    3.80 
  -6   3   1   35.90    3.00 
  -6   3   1   37.50    3.00 
   5  -3  -1   40.10    2.70 
   5  -3  -1   39.50    3.10 
   5  -3  -1   34.80    3.20 
   5  -3  -1   40.00    2.70 
   5  -3  -1   41.60    3.70 
  -5   3   1   44.30    3.30 
  -5   3   1   37.10    3.10 
  -5   3   1   40.90    3.10 
  -5   3   1   42.80    3.90 
   4  -3  -1   61.99    3.90 
   4  -3  -1   72.39    3.50 
   4  -3  -1   65.19    4.40 
   4  -3  -1   65.39    3.80 
   4  -3  -1   66.19    3.30 
   4  -3  -1   60.39    3.00 
   4  -3  -1   68.99    4.20 
  -4   3   1   68.29    3.90 
  -4   3   1   70.89    4.50 
  -4   3   1   62.89    3.70 
  -4   3   1   65.89    3.70 
  -4   3   1   69.19    8.70 
  -4   3   1   61.79    3.10 
   3  -3  -1   85.09    4.10 
   3  -3  -1   86.79    4.80 
   3  -3  -1   87.29    4.20 
   3  -3  -1   87.79    3.60 
   3  -3  -1   80.89    4.50 
  -3   3   1   86.59    4.30 
  -3   3   1   84.49    8.20 
  -3   3   1   89.59    4.80 
   2  -3  -1  550.64   20.60 
   2  -3  -1  570.34   19.60 
   2  -3  -1  575.14   20.60 
   2  -3  -1  579.24   20.10 
   2  -3  -1  573.44   19.50 
   2  -3  -1  526.55   19.90 
   2  -3  -1  545.85   19.80 
  -2   3   1  592.54   25.40 
  -2   3   1  580.64   21.00 
  -2   3   1  580.24   20.60 
  -2   3   1  589.44   20.90 
   1  -3  -1  179.38    7.40 
   1  -3  -1  185.88    7.70 
   1  -3  -1  196.48    6.90 
   1  -3  -1  201.58    7.40 
   1  -3  -1  188.98    6.70 
  -1   3   1  196.78    7.30 
  -1   3   1  172.38    7.00 
  -1   3   1  207.38   11.60 
  -1   3   1  191.78    7.60 
  -1   3   1  194.68    7.90 
  -1   3   1  185.78    7.00 
   0  -3  -1  696.83   23.40 
   0  -3  -1  673.33   23.80 
   0  -3  -1  680.93   22.80 
   0  -3  -1  727.83   23.10 
   0   3   1  647.44   27.30 
   0   3   1  718.93   23.40 
   0   3   1  683.73   23.90 
   0   3   1  722.33   23.10 
   0   3   1  649.24   23.00 
   0   3   1  600.54   23.00 
   0   3   1  647.74   23.40 
  -1  -3  -1  747.93   24.80 
  -1  -3  -1  729.33   25.10 
   1   3   1  718.73   25.50 
   1   3   1  702.63   25.40 
   1   3   1  742.43   25.10 
   1   3   1  759.12   25.10 
  -2  -3  -1  466.25   16.20 
  -2  -3  -1  442.76   16.10 
  -2  -3  -1  477.55   15.90 
   2   3   1  465.75   16.50 
   2   3   1  455.75   16.30 
   2   3   1  442.76   16.30 
   2   3   1  482.65   16.10 
   2   3   1  482.35   16.20 
  -3  -3  -1  679.63   24.40 
  -3  -3  -1  706.23   25.20 
  -3  -3  -1  729.03   24.10 
  -3  -3  -1  722.83   24.60 
  -3  -3  -1  752.52   24.70 
  -3  -3  -1  673.93   24.30 
   3   3   1  651.03   24.40 
   3   3   1  729.63   24.40 
   3   3   1  750.32   24.70 
   3   3   1  747.83   24.10 
   3   3   1  701.83   24.80 
   3   3   1  705.13   24.80 
  -4  -3  -1  292.77   10.80 
  -4  -3  -1  323.37   11.80 
  -4  -3  -1  323.77   11.70 
  -4  -3  -1  312.17   12.70 
  -4  -3  -1  314.57   11.40 
  -4  -3  -1  288.17   11.00 
   4   3   1  306.37   11.40 
   4   3   1  320.57   11.60 
   4   3   1  306.97   11.70 
   4   3   1  319.97   11.20 
   4   3   1  330.87   11.00 
   4   3   1  324.27   12.10 
  -5  -3  -1 1087.59   37.50 
  -5  -3  -1 1089.19   37.00 
  -5  -3  -1 1051.19   39.20 
  -5  -3  -1 1084.29   37.40 
   5   3   1 1083.79   36.40 
   5   3   1 1027.70   37.10 
   5   3   1 1095.69   37.90 
   5   3   1 1052.89   37.10 
  -6  -3  -1  301.47   12.20 
  -6  -3  -1  336.77   12.50 
  -6  -3  -1  323.17   15.70 
  -6  -3  -1  311.87   12.10 
  -6  -3  -1  303.67   12.40 
  -6  -3  -1  326.57   13.00 
  -6  -3  -1  346.37   13.00 
   6   3   1  315.97   11.80 
   6   3   1  311.27   11.70 
   6   3   1  343.97   13.70 
   6   3   1  350.16   12.70 
   6   3   1  330.37   11.70 
   6   3   1  316.47   11.90 
  -7  -3  -1  764.12   28.90 
  -7  -3  -1  712.93   26.60 
  -7  -3  -1  767.62   27.00 
  -7  -3  -1  740.43   27.20 
  -7  -3  -1  789.02   27.60 
  -7  -3  -1  791.32   27.50 
  -7  -3  -1  766.82   28.10 
   7   3   1  816.32   27.90 
   7   3   1  777.52   26.90 
   7   3   1  796.52   29.10 
   7   3   1  730.63   27.20 
   7   3   1  759.62   26.70 
   7   3   1  715.43   27.40 
   7   3   1  763.82   26.60 
  -8  -3  -1  240.88   10.30 
  -8  -3  -1  242.98   10.20 
  -8  -3  -1  238.48   10.00 
  -8  -3  -1  233.78   10.80 
  -8  -3  -1  254.87    9.80 
   8   3   1  247.68   10.60 
   8   3   1  230.98   10.00 
   8   3   1  248.98    9.50 
   8   3   1  246.28    9.60 
   8   3   1  243.18    9.40 
   8   3   1  227.18   11.60 
  -9  -3  -1  164.88    7.30 
  -9  -3  -1  167.88    7.60 
  -9  -3  -1  168.58    7.00 
   9   3   1  164.88    6.90 
   9   3   1  165.98    6.90 
   9   3   1  145.69    7.90 
   9   3   1  161.98    7.50 
   9   3   1  177.98    6.90 
 -10  -3  -1  289.77   10.80 
 -10  -3  -1  283.67   10.50 
 -10  -3  -1  298.17   11.00 
  10   3   1  286.77   10.50 
  10   3   1  274.27   10.40 
  10   3   1  280.07   10.40 
   6  -4  -1   57.59    3.10 
   6  -4  -1   56.99    3.90 
   6  -4  -1   59.59    3.90 
   6  -4  -1   55.09    3.10 
  -6   4   1   59.59    3.70 
  -6   4   1   53.09    3.30 
  -6   4   1   60.09    3.60 
   5  -4  -1   20.80    2.00 
   5  -4  -1   23.40    3.00 
   5  -4  -1   22.70    2.90 
   5  -4  -1   22.40    2.20 
  -5   4   1   20.20    2.30 
  -5   4   1   19.20    2.30 
  -5   4   1   26.50    2.60 
  -5   4   1   21.40    3.10 
  -5   4   1   19.30    3.00 
   4  -4  -1   66.69    4.40 
   4  -4  -1   61.49    3.40 
   4  -4  -1   60.79    3.30 
   4  -4  -1   54.69    4.00 
  -4   4   1   62.09    3.90 
  -4   4   1   66.49    3.90 
  -4   4   1   61.99    4.60 
  -4   4   1   60.69    3.60 
  -4   4   1   56.89    3.10 
   3  -4  -1  206.58   12.70 
   3  -4  -1  251.47   10.20 
   3  -4  -1  248.28    9.10 
   3  -4  -1  238.98    9.30 
   3  -4  -1  239.38    9.90 
   3  -4  -1  240.98    9.50 
  -3   4   1  242.78    9.70 
  -3   4   1  244.08   10.80 
  -3   4   1  231.58    9.00 
  -3   4   1  235.18    9.60 
  -3   4   1  247.18   16.00 
  -3   4   1  252.77   10.60 
  -3   4   1  239.38    9.40 
  -3   4   1  234.08    9.10 
   2  -4  -1  197.48    8.70 
   2  -4  -1  193.08    8.30 
   2  -4  -1  199.58    7.40 
   2  -4  -1  191.98    8.00 
   2  -4  -1  194.08    8.30 
  -2   4   1  182.68    8.20 
  -2   4   1  194.68    8.50 
  -2   4   1  199.08    9.00 
  -2   4   1  210.38   13.50 
   1  -4  -1  613.64   22.00 
   1  -4  -1  620.14   21.40 
   1  -4  -1  620.04   20.80 
   1  -4  -1  580.34   20.50 
  -1   4   1  614.24   22.30 
  -1   4   1  610.64   21.30 
  -1   4   1  544.15   26.90 
  -1   4   1  612.64   21.70 
   0  -4  -1  118.79    4.50 
   0  -4  -1  124.59    5.70 
   0  -4  -1  115.49    5.20 
   0  -4  -1  129.29    4.90 
   0  -4  -1  127.39    5.30 
   0   4   1  135.19    5.50 
   0   4   1  123.99    5.20 
   0   4   1  122.59    5.90 
   0   4   1  135.19    4.90 
  -1  -4  -1 2476.55   84.09 
  -1  -4  -1 2599.04   83.69 
  -1  -4  -1 2575.84   83.19 
   1   4   1 2425.56   83.29 
   1   4   1 2535.25   84.29 
   1   4   1 2305.97   83.79 
   1   4   1 2543.85   83.49 
   1   4   1 2374.86   83.59 
  -2  -4  -1 2383.06   81.99 
  -2  -4  -1 2437.76   81.49 
  -2  -4  -1 2520.25   81.09 
   2   4   1 2493.55   82.19 
   2   4   1 2221.38   81.39 
   2   4   1 2465.65   81.49 
  -3  -4  -1  109.89    4.60 
  -3  -4  -1  123.99    4.50 
  -3  -4  -1  121.29    4.90 
  -3  -4  -1  114.79    4.90 
  -3  -4  -1  118.39    5.20 
   3   4   1  114.19    5.00 
   3   4   1  120.39    5.40 
   3   4   1  123.59    5.00 
   3   4   1  113.69    4.70 
   3   4   1  121.99    4.80 
  -4  -4  -1  182.98    7.10 
  -4  -4  -1  186.28    6.80 
  -4  -4  -1  200.38    7.60 
  -4  -4  -1  185.28    7.30 
   4   4   1  191.58    7.80 
   4   4   1  189.38    6.80 
   4   4   1  191.78    7.20 
   4   4   1  195.48    7.60 
   4   4   1  186.98    7.90 
   4   4   1  182.08    7.30 
  -5  -4  -1  130.39    6.00 
  -5  -4  -1  133.39    6.00 
  -5  -4  -1  135.09    5.60 
   5   4   1  126.79    5.00 
   5   4   1  132.99    6.30 
   5   4   1  125.69    6.00 
   5   4   1  132.99    5.70 
   5   4   1  128.89    5.90 
   5   4   1  124.99    5.30 
  -6  -4  -1   89.39    4.40 
  -6  -4  -1   98.09    4.50 
  -6  -4  -1   97.59    4.80 
  -6  -4  -1   98.99    5.20 
  -6  -4  -1   88.49    4.20 
  -6  -4  -1   98.19    5.20 
  -6  -4  -1   92.99    4.80 
   6   4   1   99.49    5.70 
   6   4   1   99.89    4.90 
   6   4   1   95.59    4.30 
   6   4   1   95.09    4.30 
   6   4   1   95.39    4.10 
   6   4   1   99.29    4.20 
  -7  -4  -1  222.88    9.10 
  -7  -4  -1  214.38    8.60 
  -7  -4  -1  218.88    9.70 
  -7  -4  -1  203.58    8.20 
  -7  -4  -1  211.28    8.50 
  -7  -4  -1  199.78    8.60 
  -7  -4  -1  206.18    9.00 
   7   4   1  226.08    8.50 
   7   4   1  206.48    8.80 
   7   4   1  193.48    8.10 
   7   4   1  222.28    9.30 
   7   4   1  215.18   10.30 
   7   4   1  205.68    8.30 
   7   4   1  217.38    8.30 
   7   4   1  207.68    8.30 
  -8  -4  -1  819.82   29.30 
  -8  -4  -1  858.71   29.40 
  -8  -4  -1  766.42   29.90 
  -8  -4  -1  766.82   28.80 
  -8  -4  -1  850.81   28.90 
   8   4   1  800.12   29.10 
   8   4   1  792.82   28.40 
   8   4   1  772.82   30.80 
   8   4   1  864.51   28.80 
   8   4   1  811.92   28.40 
   8   4   1  832.22   29.60 
  -9  -4  -1  120.99    5.60 
  -9  -4  -1  112.49    5.60 
  -9  -4  -1  118.59    6.00 
  -9  -4  -1  122.09    6.10 
   9   4   1  131.19    5.40 
   9   4   1  122.49    5.30 
   9   4   1  119.09    6.30 
   9   4   1  125.69    5.60 
 -10  -4  -1  221.28    8.20 
 -10  -4  -1  208.38    8.50 
  10   4   1  205.48    7.90 
  10   4   1  214.58    8.10 
  10   4   1  193.88    7.80 
   6  -5  -1   15.40    3.10 
   6  -5  -1    9.20    1.50 
   6  -5  -1   12.90    1.80 
  -6   5   1   11.20    1.50 
  -6   5   1   12.20    1.60 
  -6   5   1   15.30    2.00 
   5  -5  -1  259.77   10.40 
   5  -5  -1  278.87   11.50 
   5  -5  -1  269.47   11.20 
  -5   5   1  272.87   11.00 
  -5   5   1  301.27   11.10 
   4  -5  -1   88.79    4.30 
   4  -5  -1   90.59    5.30 
   4  -5  -1   82.99    4.90 
  -4   5   1   82.79    4.10 
  -4   5   1   65.49    4.10 
  -4   5   1   88.59    5.80 
  -4   5   1   85.99    4.80 
  -4   5   1   90.39    5.70 
  -4   5   1   89.19    4.90 
   3  -5  -1  206.58    8.10 
   3  -5  -1  200.58    8.80 
   3  -5  -1  194.98    9.00 
   3  -5  -1  182.18    8.20 
  -3   5   1  201.38    9.40 
  -3   5   1  199.28    8.60 
  -3   5   1  201.28    7.80 
  -3   5   1  200.18   15.40 
  -3   5   1  196.68    7.90 
  -3   5   1  196.28    8.50 
   2  -5  -1  278.07   11.00 
   2  -5  -1  288.07   12.20 
   2  -5  -1  298.07   11.80 
   2  -5  -1  275.27   10.80 
   2  -5  -1  266.67   11.40 
   2  -5  -1  286.87   10.80 
   2  -5  -1  292.47   11.40 
  -2   5   1  276.17   11.20 
  -2   5   1  313.97   18.70 
  -2   5   1  298.77   12.10 
  -2   5   1  278.97   11.10 
  -2   5   1  278.97   10.50 
  -2   5   1  273.37   12.40 
  -2   5   1  271.27   10.70 
   1  -5  -1  260.77    9.90 
   1  -5  -1  284.97   10.50 
   1  -5  -1  256.17   10.40 
   1  -5  -1  254.07   10.00 
   1  -5  -1  254.27    9.70 
   1  -5  -1  280.77   11.30 
   1  -5  -1  264.57    9.60 
  -1   5   1  244.78    9.70 
  -1   5   1  247.58   10.00 
  -1   5   1  243.88   10.30 
  -1   5   1  249.08    9.50 
  -1   5   1  265.77   10.70 
  -1   5   1  262.77   10.20 
  -1   5   1  274.97   11.40 
  -1   5   1  224.38   16.20 
   0  -5  -1 1087.29   37.10 
   0  -5  -1 1086.29   37.90 
   0  -5  -1 1065.59   36.40 
   0   5   1 1059.79   38.10 
   0   5   1 1042.50   37.30 
   0   5   1 1065.59   37.00 
  -1  -5  -1   55.99    2.60 
  -1  -5  -1   57.19    3.20 
  -1  -5  -1   59.09    3.70 
   1   5   1   55.69    3.20 
   1   5   1   53.79    3.20 
   1   5   1   57.89    3.10 
   1   5   1   57.79    3.80 
  -2  -5  -1  825.82   28.30 
  -2  -5  -1  854.71   28.90 
  -2  -5  -1  838.02   29.50 
   2   5   1  768.82   28.80 
   2   5   1  817.72   28.70 
   2   5   1  843.62   29.70 
   2   5   1  847.62   28.80 
  -3  -5  -1 1194.58   40.20 
  -3  -5  -1 1189.88   39.70 
  -3  -5  -1 1156.28   40.80 
   3   5   1 1189.68   40.20 
   3   5   1 1095.09   40.10 
   3   5   1 1197.28   41.10 
  -4  -5  -1  731.83   27.10 
  -4  -5  -1  789.72   26.20 
  -4  -5  -1  780.22   26.70 
  -4  -5  -1  753.72   26.60 
   4   5   1  753.22   27.00 
   4   5   1  781.82   27.70 
   4   5   1  750.22   27.10 
   4   5   1  783.82   26.70 
  -5  -5  -1  395.16   14.80 
  -5  -5  -1  415.26   14.90 
  -5  -5  -1  418.76   15.30 
   5   5   1  410.06   14.40 
   5   5   1  412.36   15.50 
   5   5   1  415.96   15.30 
   5   5   1  403.06   14.80 
   5   5   1  372.06   14.80 
   5   5   1  413.26   15.70 
   5   5   1  394.66   14.70 
  -6  -5  -1  107.79    5.40 
  -6  -5  -1  107.29    5.10 
  -6  -5  -1  103.09    4.70 
  -6  -5  -1  117.69    5.40 
  -6  -5  -1  118.09    5.80 
  -6  -5  -1  109.69    5.00 
  -6  -5  -1  107.19    5.10 
   6   5   1  115.89    4.90 
   6   5   1  103.49    4.50 
   6   5   1  111.39    5.30 
   6   5   1  109.99    4.70 
   6   5   1  113.09    4.60 
   6   5   1  113.39    5.00 
   6   5   1  113.09    6.10 
  -7  -5  -1  343.27   13.10 
  -7  -5  -1  327.47   12.70 
  -7  -5  -1  354.66   13.60 
  -7  -5  -1  340.87   13.10 
  -7  -5  -1  359.46   13.60 
  -7  -5  -1  340.27   14.10 
   7   5   1  340.27   12.90 
   7   5   1  339.87   13.40 
   7   5   1  361.86   12.80 
   7   5   1  342.57   14.60 
   7   5   1  357.36   13.00 
   7   5   1  339.17   13.60 
  -8  -5  -1   68.69    5.90 
  -8  -5  -1   72.49    4.40 
  -8  -5  -1   77.09    4.60 
  -8  -5  -1   71.69    3.90 
  -8  -5  -1   74.49    4.10 
   8   5   1   76.09    4.00 
   8   5   1   78.49    3.70 
   8   5   1   68.99    3.70 
   8   5   1   67.69    4.50 
   8   5   1   56.79    5.00 
  -9  -5  -1   78.19    4.60 
  -9  -5  -1   86.99    4.40 
  -9  -5  -1   83.99    4.80 
   9   5   1   87.09    4.10 
   9   5   1   78.99    4.20 
 -10  -5  -1   99.29    4.40 
 -10  -5  -1   91.99    4.60 
  10   5   1   88.49    4.00 
  10   5   1   90.59    4.20 
   5  -6  -1   31.30    2.50 
   5  -6  -1   29.20    2.60 
  -5   6   1   29.00    2.30 
  -5   6   1   27.80    2.20 
   4  -6  -1    4.10    1.60 
   4  -6  -1    3.50    1.10 
   4  -6  -1    5.40    1.70 
  -4   6   1    5.00    1.10 
  -4   6   1    4.40    1.50 
  -4   6   1    3.40    1.40 
   3  -6  -1  429.36   16.30 
   3  -6  -1  418.96   15.00 
   3  -6  -1  375.96   15.70 
   3  -6  -1  405.06   15.20 
  -3   6   1  396.66   16.80 
  -3   6   1  410.06   14.90 
  -3   6   1  387.96   23.70 
  -3   6   1  421.36   15.50 
  -3   6   1  417.66   15.50 
  -3   6   1  406.46   16.60 
  -3   6   1  379.86   14.50 
   2  -6  -1  143.29    6.00 
   2  -6  -1  135.59    6.30 
   2  -6  -1  136.39    7.00 
   2  -6  -1  135.49    7.50 
   2  -6  -1  129.49    6.00 
   2  -6  -1  130.59    6.60 
   2  -6  -1  138.69    6.80 
  -2   6   1  140.39   13.00 
  -2   6   1  141.49    7.40 
  -2   6   1  137.59    7.50 
  -2   6   1  134.49    6.40 
  -2   6   1  134.59    6.00 
  -2   6   1  140.99    6.40 
  -2   6   1  131.39    7.60 
  -2   6   1  131.49    5.70 
   1  -6  -1  274.57   11.00 
   1  -6  -1  298.67   11.20 
   1  -6  -1  285.47   11.50 
   1  -6  -1  300.57   12.10 
   1  -6  -1  291.57   11.30 
   1  -6  -1  286.97   11.90 
   1  -6  -1  281.47   11.50 
   1  -6  -1  307.37   12.00 
   1  -6  -1  312.57   13.10 
  -1   6   1  296.77   13.20 
  -1   6   1  295.47   11.00 
  -1   6   1  324.37   20.10 
  -1   6   1  268.77   11.90 
  -1   6   1  290.77   11.50 
  -1   6   1  285.37   11.50 
  -1   6   1  305.27   11.20 
  -1   6   1  299.47   12.60 
  -1   6   1  289.87   12.30 
   0  -6  -1   15.80    1.80 
   0  -6  -1   16.90    1.50 
   0  -6  -1   17.30    1.60 
   0  -6  -1   16.30    2.50 
   0  -6  -1   15.50    2.10 
   0  -6  -1   14.80    2.00 
   0  -6  -1   16.70    2.00 
   0  -6  -1   14.00    1.70 
   0  -6  -1   16.20    2.20 
   0   6   1   16.00    2.00 
   0   6   1   15.70    2.50 
   0   6   1   12.80    1.80 
   0   6   1   16.10    2.20 
   0   6   1   17.20    1.50 
   0   6   1   13.70    1.70 
   0   6   1   18.70    2.30 
   0   6   1   14.80    2.20 
   0   6   1   17.40    1.70 
  -1  -6  -1  514.25   18.20 
  -1  -6  -1  497.55   18.70 
  -1  -6  -1  512.85   18.40 
  -1  -6  -1  460.65   18.70 
  -1  -6  -1  567.04   20.00 
  -1  -6  -1  535.65   18.20 
  -1  -6  -1  485.75   19.10 
  -1  -6  -1  518.15   18.50 
  -1  -6  -1  549.65   19.00 
   1   6   1  535.25   20.10 
   1   6   1  525.95   18.80 
   1   6   1  488.35   18.70 
   1   6   1  503.05   18.20 
   1   6   1  512.15   18.10 
   1   6   1  477.95   18.20 
   1   6   1  525.35   19.10 
  -2  -6  -1  631.84   22.00 
  -2  -6  -1  671.03   23.70 
  -2  -6  -1  574.54   22.30 
  -2  -6  -1  653.03   22.80 
   2   6   1  645.04   22.70 
   2   6   1  608.54   22.70 
   2   6   1  637.44   22.30 
   2   6   1  623.44   22.80 
   2   6   1  657.43   24.00 
  -3  -6  -1  177.28    6.80 
  -3  -6  -1  188.08    7.50 
  -3  -6  -1  181.58    8.10 
   3   6   1  159.08    7.50 
   3   6   1  172.88    6.70 
   3   6   1  189.68    8.50 
   3   6   1  167.38    7.40 
   3   6   1  182.48    7.40 
  -4  -6  -1  118.19    5.40 
  -4  -6  -1  133.19    5.80 
  -4  -6  -1  125.49    5.60 
  -4  -6  -1  118.79    6.00 
  -4  -6  -1  123.29    5.00 
  -4  -6  -1  133.59    5.60 
   4   6   1  126.59    5.10 
   4   6   1  122.89    5.50 
   4   6   1  116.09    5.60 
   4   6   1  126.79    5.10 
   4   6   1  118.39    5.20 
   4   6   1  127.09    6.50 
  -5  -6  -1   49.50    2.80 
  -5  -6  -1   52.79    3.00 
  -5  -6  -1   54.39    3.30 
  -5  -6  -1   53.49    2.90 
  -5  -6  -1   54.19    2.90 
  -5  -6  -1   53.49    3.10 
  -5  -6  -1   50.69    3.50 
  -5  -6  -1   52.49    3.00 
   5   6   1   50.59    3.10 
   5   6   1   52.49    3.20 
   5   6   1   53.89    2.70 
   5   6   1   50.79    3.20 
   5   6   1   56.19    2.80 
   5   6   1   53.69    3.90 
   5   6   1   54.09    3.00 
  -6  -6  -1  172.18    7.40 
  -6  -6  -1  170.08    6.90 
  -6  -6  -1  169.78    7.20 
  -6  -6  -1  175.88    7.80 
  -6  -6  -1  175.38    7.40 
  -6  -6  -1  159.98    7.30 
   6   6   1  174.68    6.80 
   6   6   1  179.98    6.90 
   6   6   1  170.98    7.00 
   6   6   1  165.48    7.40 
   6   6   1  181.48    7.30 
  -7  -6  -1  791.42   27.90 
  -7  -6  -1  765.92   27.40 
  -7  -6  -1  762.62   27.50 
  -7  -6  -1  749.23   27.60 
  -7  -6  -1  754.02   27.20 
   7   6   1  800.92   27.10 
   7   6   1  748.93   26.70 
   7   6   1  777.52   26.90 
   7   6   1  773.82   27.20 
  -8  -6  -1   47.20    3.20 
  -8  -6  -1   50.49    3.60 
  -8  -6  -1   51.29    3.70 
  -8  -6  -1   47.50    3.30 
   8   6   1   49.40    3.20 
   8   6   1   54.39    3.00 
   8   6   1   50.69    3.10 
  -9  -6  -1   58.09    3.50 
  -9  -6  -1   58.99    4.00 
  -9  -6  -1   60.19    3.40 
   9   6   1   52.99    3.20 
   9   6   1   59.29    3.10 
   9   6   1   56.89    3.30 
 -10  -6  -1  123.19    5.20 
 -10  -6  -1  119.09    5.50 
  10   6   1  117.79    4.90 
  10   6   1  118.89    5.10 
   4  -7  -1   24.40    2.40 
   4  -7  -1   27.20    2.50 
  -4   7   1   24.80    2.10 
  -4   7   1   23.10    2.00 
   3  -7  -1  120.49    5.70 
   3  -7  -1  124.59    5.60 
   3  -7  -1  132.59    6.40 
   3  -7  -1  151.08    6.80 
  -3   7   1  133.89    6.10 
  -3   7   1  141.09    6.20 
  -3   7   1  136.69    5.70 
   2  -7  -1  133.99    7.60 
   2  -7  -1  137.39    6.80 
   2  -7  -1  133.59    6.30 
   2  -7  -1  134.19    6.00 
   2  -7  -1  144.19    7.10 
   2  -7  -1  145.19    6.00 
  -2   7   1  136.49    5.70 
  -2   7   1  128.79    7.10 
  -2   7   1  143.99    6.50 
  -2   7   1  147.59    6.20 
  -2   7   1  140.39    6.40 
  -2   7   1  134.69    7.50 
  -2   7   1  130.49   12.90 
   1  -7  -1  454.75   16.60 
   1  -7  -1  438.86   17.10 
   1  -7  -1  408.76   17.00 
   1  -7  -1  407.86   16.50 
   1  -7  -1  457.95   17.30 
   1  -7  -1  438.96   16.30 
   1  -7  -1  444.86   16.20 
   1  -7  -1  442.76   18.20 
  -1   7   1  435.26   25.60 
  -1   7   1  413.86   17.60 
  -1   7   1  432.06   17.50 
  -1   7   1  457.95   16.60 
  -1   7   1  442.96   16.60 
  -1   7   1  451.45   16.00 
  -1   7   1  480.55   16.40 
   0  -7  -1  255.37    9.70 
   0  -7  -1  241.28   10.20 
   0  -7  -1  248.38   11.40 
   0  -7  -1  234.08   10.20 
   0  -7  -1  230.28    9.90 
   0  -7  -1  248.38    9.90 
   0  -7  -1  250.77    9.50 
   0  -7  -1  234.28   10.20 
   0   7   1  238.78   11.50 
   0   7   1  230.48    9.20 
   0   7   1  236.28    9.80 
   0   7   1  236.18   10.50 
   0   7   1  244.28    9.50 
   0   7   1  231.98    9.90 
  -1  -7  -1    8.40    1.50 
  -1  -7  -1    9.50    2.30 
  -1  -7  -1    8.50    1.50 
  -1  -7  -1    9.90    1.80 
  -1  -7  -1   10.00    1.90 
  -1  -7  -1    9.40    1.40 
  -1  -7  -1    9.00    1.90 
  -1  -7  -1   10.70    2.00 
   1   7   1    8.20    1.80 
   1   7   1    7.80    1.20 
   1   7   1    9.10    1.40 
   1   7   1   10.00    1.70 
   1   7   1    7.80    1.60 
   1   7   1   10.30    2.60 
   1   7   1    4.10    7.00 
  -2  -7  -1  486.75   17.40 
  -2  -7  -1  501.55   18.10 
  -2  -7  -1  464.25   17.90 
  -2  -7  -1  520.05   19.20 
  -2  -7  -1  466.85   17.10 
  -2  -7  -1  463.15   17.10 
  -2  -7  -1  472.45   17.80 
  -2  -7  -1  448.16   17.20 
  -2  -7  -1  478.95   17.50 
   2   7   1  473.55   18.00 
   2   7   1  489.95   17.00 
   2   7   1  502.85   19.50 
   2   7   1  479.45   17.60 
   2   7   1  462.95   17.10 
   2   7   1  496.35   17.90 
   2   7   1  472.05   16.90 
   2   7   1  481.65   17.90 
   2   7   1  423.06   26.60 
  -3  -7  -1  336.37   12.90 
  -3  -7  -1  345.17   12.90 
  -3  -7  -1  346.67   13.00 
  -3  -7  -1  344.97   13.30 
  -3  -7  -1  358.56   14.40 
  -3  -7  -1  353.86   13.50 
  -3  -7  -1  341.47   13.50 
  -3  -7  -1  330.67   12.60 
  -3  -7  -1  334.17   12.70 
   3   7   1  319.57   12.50 
   3   7   1  350.16   12.60 
   3   7   1  340.77   13.10 
   3   7   1  364.06   13.50 
   3   7   1  332.67   13.30 
   3   7   1  356.56   12.60 
   3   7   1  363.76   14.80 
   3   7   1  335.87   12.70 
  -4  -7  -1  367.66   14.10 
  -4  -7  -1  383.76   14.50 
  -4  -7  -1  368.46   15.10 
  -4  -7  -1  381.96   14.10 
  -4  -7  -1  380.16   14.00 
  -4  -7  -1  348.57   13.70 
  -4  -7  -1  370.76   14.60 
  -4  -7  -1  368.86   14.40 
   4   7   1  380.56   14.30 
   4   7   1  398.06   13.80 
   4   7   1  368.56   14.40 
   4   7   1  394.16   15.90 
   4   7   1  385.66   14.00 
   4   7   1  379.56   13.70 
   4   7   1  390.86   14.60 
  -5  -7  -1   26.10    2.30 
  -5  -7  -1   25.30    2.10 
  -5  -7  -1   26.40    2.70 
  -5  -7  -1   26.80    2.30 
  -5  -7  -1   27.50    2.10 
  -5  -7  -1   26.80    2.60 
   5   7   1   29.60    2.00 
   5   7   1   27.50    2.40 
   5   7   1   28.70    2.00 
   5   7   1   24.50    2.40 
   5   7   1   30.10    2.50 
   5   7   1   29.00    3.20 
   5   7   1   28.40    2.30 
  -6  -7  -1   14.20    2.10 
  -6  -7  -1   11.00    2.10 
  -6  -7  -1   12.70    2.00 
  -6  -7  -1   11.60    1.60 
  -6  -7  -1   11.20    2.10 
   6   7   1   10.80    1.50 
   6   7   1   11.20    1.50 
   6   7   1   11.80    1.50 
   6   7   1   11.60    1.90 
   6   7   1   14.10    1.90 
  -7  -7  -1  143.29    6.40 
  -7  -7  -1  141.19    6.80 
  -7  -7  -1  140.99    6.70 
  -7  -7  -1  152.38    6.70 
  -7  -7  -1  146.59    7.10 
   7   7   1  149.19    6.40 
   7   7   1  157.98    6.30 
   7   7   1  156.08    6.60 
   7   7   1  143.99    6.10 
  -8  -7  -1  162.08    7.50 
  -8  -7  -1  158.08    7.00 
  -8  -7  -1  145.99    7.10 
  -8  -7  -1  165.48    7.10 
  -8  -7  -1  161.08    6.90 
   8   7   1  151.28    6.30 
   8   7   1  160.98    6.80 
   8   7   1  162.08    6.60 
   8   7   1  167.88    7.00 
  -9  -7  -1   21.90    2.20 
  -9  -7  -1   15.40    1.70 
  -9  -7  -1   20.00    2.30 
   9   7   1   19.80    1.80 
   9   7   1   20.80    2.00 
   9   7   1   20.60    2.00 
 -10  -7  -1   35.60    2.30 
 -10  -7  -1   41.20    2.80 
 -10  -7  -1   37.20    2.30 
  10   7   1   38.30    2.10 
  10   7   1   41.20    2.30 
   3  -8  -1   89.69    4.30 
   3  -8  -1   66.69    4.10 
  -3   8   1   85.39    3.90 
   2  -8  -1  202.48    8.60 
   2  -8  -1  181.78    7.70 
   2  -8  -1  197.08    8.40 
  -2   8   1  180.08    7.80 
  -2   8   1  198.48    8.10 
  -2   8   1  211.38    7.80 
   1  -8  -1   93.99    4.50 
   1  -8  -1  102.59    5.60 
   1  -8  -1   93.59    4.80 
   1  -8  -1  107.79    5.60 
   1  -8  -1   97.69    4.70 
  -1   8   1   97.49    5.10 
  -1   8   1  101.39    4.80 
  -1   8   1   87.89    4.20 
   0  -8  -1   58.69    3.70 
   0  -8  -1   56.09    4.10 
   0  -8  -1   58.09    3.40 
   0  -8  -1   53.09    3.70 
   0  -8  -1   53.79    3.20 
   0  -8  -1   54.29    4.00 
   0  -8  -1   56.69    4.70 
   0   8   1   57.29    9.20 
   0   8   1   54.69    3.40 
   0   8   1   52.79    4.10 
   0   8   1   52.89    3.50 
   0   8   1   58.49    3.10 
   0   8   1   52.39    3.60 
  -1  -8  -1  559.74   21.80 
  -1  -8  -1  534.05   20.10 
  -1  -8  -1  535.65   20.30 
  -1  -8  -1  562.74   19.90 
  -1  -8  -1  552.84   20.00 
  -1  -8  -1  560.54   20.60 
  -1  -8  -1  526.15   19.40 
   1   8   1  531.95   19.30 
   1   8   1  537.75   20.20 
   1   8   1  496.55   21.90 
   1   8   1  549.85   20.10 
   1   8   1  523.05   20.60 
   1   8   1  564.64   19.60 
  -2  -8  -1  208.08    8.60 
  -2  -8  -1  200.08    8.60 
  -2  -8  -1  198.18    8.10 
  -2  -8  -1  204.68   10.10 
  -2  -8  -1  202.28    9.10 
  -2  -8  -1  206.78    9.20 
  -2  -8  -1  201.98    8.90 
   2   8   1  207.18    8.10 
   2   8   1  206.78    9.00 
   2   8   1  203.58    8.70 
   2   8   1  197.38   10.30 
   2   8   1  200.18    8.20 
   2   8   1  208.38    8.00 
  -3  -8  -1 1967.10   65.59 
  -3  -8  -1 1976.30   67.49 
  -3  -8  -1 1886.71   66.19 
  -3  -8  -1 1964.10   66.09 
  -3  -8  -1 1833.22   65.19 
  -3  -8  -1 1908.61   66.19 
  -3  -8  -1 1952.90   65.69 
  -3  -8  -1 1876.61   65.39 
   3   8   1 1889.21   67.79 
   3   8   1 1805.42   65.19 
   3   8   1 1983.10   66.19 
   3   8   1 1918.41   65.09 
   3   8   1 1893.51   65.09 
   3   8   1 1957.60   65.09 
   3   8   1 1946.01   65.79 
  -4  -8  -1  757.12   26.30 
  -4  -8  -1  745.23   26.70 
  -4  -8  -1  726.13   26.10 
  -4  -8  -1  749.62   26.20 
  -4  -8  -1  729.23   27.60 
  -4  -8  -1  696.33   26.50 
  -4  -8  -1  704.13   25.70 
  -4  -8  -1  730.43   26.80 
   4   8   1  775.72   25.80 
   4   8   1  738.83   26.40 
   4   8   1  717.13   28.20 
   4   8   1  728.33   25.70 
   4   8   1  756.82   26.80 
   4   8   1  731.13   26.00 
  -5  -8  -1  366.86   13.80 
  -5  -8  -1  376.86   14.40 
  -5  -8  -1  356.46   13.90 
  -5  -8  -1  365.06   13.80 
  -5  -8  -1  379.56   14.60 
   5   8   1  365.76   14.30 
   5   8   1  348.87   14.00 
   5   8   1  372.86   13.50 
   5   8   1  373.16   13.80 
   5   8   1  367.36   13.50 
   5   8   1  343.07   15.60 
  -6  -8  -1   88.99    4.70 
  -6  -8  -1   87.99    4.90 
  -6  -8  -1   84.29    4.40 
  -6  -8  -1   91.29    5.30 
  -6  -8  -1   83.49    4.40 
   6   8   1   83.79    4.70 
   6   8   1   89.29    4.60 
   6   8   1   90.49    4.20 
   6   8   1   89.09    4.20 
  -7  -8  -1    6.10    1.60 
  -7  -8  -1    7.20    2.00 
  -7  -8  -1    6.70    1.70 
   7   8   1    3.60    1.10 
   7   8   1    3.90    1.30 
   7   8   1    4.40    1.20 
   7   8   1    6.10    1.20 
  -8  -8  -1    7.00    1.50 
  -8  -8  -1    6.90    1.60 
  -8  -8  -1    4.50    1.10 
  -8  -8  -1    7.10    1.90 
   8   8   1    6.40    1.20 
   8   8   1    7.40    1.50 
   8   8   1    7.30    1.30 
   8   8   1    5.60    1.10 
  -9  -8  -1    6.00    1.10 
  -9  -8  -1    6.40    1.30 
  -9  -8  -1    6.70    1.70 
   9   8   1    5.70    1.10 
   9   8   1    6.70    1.10 
   9   8   1    6.10    1.20 
 -10  -8  -1   29.50    2.20 
   1  -9  -1  139.49    6.30 
   1  -9  -1  131.89    5.60 
   1  -9  -1  145.09    5.90 
   1  -9  -1  142.69    6.30 
  -1   9   1  148.29    5.80 
  -1   9   1  134.99    6.00 
   0  -9  -1  214.88    8.50 
   0  -9  -1  207.18    8.30 
   0  -9  -1  200.68    8.80 
   0  -9  -1  218.18    9.10 
   0   9   1  205.58    8.60 
   0   9   1  197.98    7.90 
   0   9   1  215.78    8.30 
  -1  -9  -1  154.18    6.40 
  -1  -9  -1  149.09    7.10 
  -1  -9  -1  149.88    6.60 
  -1  -9  -1  138.49    6.80 
  -1  -9  -1  141.29    6.60 
   1   9   1  146.69    6.20 
   1   9   1  137.19    6.60 
   1   9   1  132.89    6.50 
   1   9   1  139.99    5.90 
  -2  -9  -1   15.00    1.90 
  -2  -9  -1   13.50    1.80 
  -2  -9  -1   14.60    2.00 
  -2  -9  -1   11.40    2.40 
  -2  -9  -1   16.50    2.40 
   2   9   1   17.40    2.30 
   2   9   1   13.60    2.10 
   2   9   1   12.00    1.60 
   2   9   1   19.10    1.90 
   2   9   1   12.30    1.60 
  -3  -9  -1  208.28    9.00 
  -3  -9  -1  204.18    9.20 
  -3  -9  -1  195.58   10.00 
  -3  -9  -1  217.68    8.70 
  -3  -9  -1  217.48    8.80 
   3   9   1  212.18    8.20 
   3   9   1  201.18    8.70 
   3   9   1  196.18    8.00 
   3   9   1  198.58    8.10 
   3   9   1  210.08    9.10 
  -4  -9  -1  110.69    5.40 
  -4  -9  -1  116.79    5.70 
  -4  -9  -1  107.09    6.50 
  -4  -9  -1  125.69    6.20 
  -4  -9  -1  117.29    5.90 
  -4  -9  -1  117.69    5.50 
   4   9   1  111.59    5.90 
   4   9   1  124.69    5.20 
   4   9   1  112.49    5.70 
   4   9   1  105.49    5.10 
   4   9   1  118.19    5.10 
  -5  -9  -1   99.59    4.90 
  -5  -9  -1  101.69    5.60 
  -5  -9  -1   90.49    4.80 
  -5  -9  -1   97.49    5.30 
  -5  -9  -1   94.69    4.90 
   5   9   1   98.59    5.30 
   5   9   1   94.99    4.50 
   5   9   1   98.49    4.80 
   5   9   1  103.89    4.60 
  -6  -9  -1  313.17   11.90 
  -6  -9  -1  306.17   12.20 
  -6  -9  -1  301.57   11.70 
  -6  -9  -1  303.17   12.40 
  -6  -9  -1  291.67   11.60 
   6   9   1  309.77   11.80 
   6   9   1  293.47   12.00 
   6   9   1  309.87   11.40 
   6   9   1  305.17   11.40 
  -7  -9  -1  286.07   11.50 
  -7  -9  -1  310.37   12.40 
  -7  -9  -1  309.67   12.20 
  -7  -9  -1  310.67   11.90 
   7   9   1  320.37   11.50 
   7   9   1  326.97   11.90 
   7   9   1  295.77   11.40 
  -8  -9  -1    0.10    1.00 
  -8  -9  -1    0.50    1.40 
  -8  -9  -1    0.50    1.10 
   8   9   1    0.40    0.80 
   8   9   1   -0.50    0.70 
   8   9   1   -0.10    1.00 
  -9  -9  -1  130.99    5.40 
  -9  -9  -1  126.39    5.60 
   9   9   1  125.49    5.10 
   9   9   1  130.29    5.30 
   0 -10  -1   19.60    2.40 
  -1 -10  -1   53.89    3.00 
  -1 -10  -1   48.00    3.30 
  -1 -10  -1   52.39    2.90 
   1  10   1   57.49    3.20 
   1  10   1   47.70    2.70 
   1  10   1   46.70    2.90 
   1  10   1   49.60    3.00 
  -2 -10  -1   21.90    2.20 
  -2 -10  -1   24.50    2.10 
  -2 -10  -1   23.10    2.30 
  -2 -10  -1   25.20    2.70 
   2  10   1   25.00    2.40 
   2  10   1   20.20    1.70 
   2  10   1   22.10    1.90 
   2  10   1   23.30    2.30 
  -3 -10  -1  182.58    7.60 
  -3 -10  -1  165.18    7.00 
  -3 -10  -1  161.68    7.20 
  -3 -10  -1  170.58    6.90 
   3  10   1  154.08    7.00 
   3  10   1  146.19    6.30 
   3  10   1  160.58    6.50 
   3  10   1  170.98    7.40 
  -4 -10  -1   42.40    2.80 
  -4 -10  -1   38.70    2.80 
  -4 -10  -1   40.20    3.10 
  -4 -10  -1   40.20    3.40 
   4  10   1   41.40    3.20 
   4  10   1   33.70    3.20 
   4  10   1   36.80    2.30 
   4  10   1   36.10    2.30 
  -5 -10  -1  312.27   12.20 
  -5 -10  -1  305.27   11.50 
  -5 -10  -1  290.77   11.90 
  -5 -10  -1  281.67   11.40 
   5  10   1  305.67   11.20 
   5  10   1  315.67   12.10 
   5  10   1  300.07   11.10 
  -6 -10  -1  458.65   17.50 
  -6 -10  -1  481.35   17.70 
  -6 -10  -1  500.95   18.20 
  -6 -10  -1  478.75   17.60 
  -6 -10  -1  528.45   18.30 
   6  10   1  497.35   18.10 
   6  10   1  471.85   17.30 
   6  10   1  502.75   17.40 
   6  10   1  488.95   17.60 
  -7 -10  -1   54.89    3.60 
  -7 -10  -1   54.29    3.30 
  -7 -10  -1   48.20    2.80 
  -7 -10  -1   53.79    3.10 
   7  10   1   53.69    2.80 
   7  10   1   53.19    3.00 
   7  10   1   50.79    2.70 
  -8 -10  -1   27.50    2.00 
  -8 -10  -1   30.00    2.30 
  -8 -10  -1   23.00    2.00 
   8  10   1   27.30    2.00 
   8  10   1   25.10    1.60 
   8  10   1   23.80    1.60 
  -3 -11  -1  119.19    4.90 
  -3 -11  -1  114.79    5.50 
  -4 -11  -1  160.88    6.50 
  -4 -11  -1  167.68    6.70 
  -4 -11  -1  144.89    6.30 
  -4 -11  -1  172.88    6.90 
   4  11   1  167.18    6.80 
  -5 -11  -1   74.89    3.70 
  -5 -11  -1   71.99    3.80 
  -5 -11  -1   72.89    3.40 
   5  11   1   70.59    3.70 
   5  11   1   65.49    3.50 
  -6 -11  -1    2.80    1.10 
  -6 -11  -1    2.20    0.90 
   6  10  -2   53.99    2.70 
   6  10  -2   57.49    2.70 
   6  10  -2   55.59    2.90 
  -6 -10   2   53.79    2.90 
  -6 -10   2   53.09    2.90 
  -6 -10   2   57.29    2.90 
  -6 -10   2   55.59    3.10 
   5  10  -2  171.78    6.60 
   5  10  -2  154.98    6.90 
   5  10  -2  171.08    6.80 
   5  10  -2  178.68    6.60 
  -5 -10   2  170.88    6.90 
  -5 -10   2  169.68    7.10 
  -5 -10   2  173.08    6.90 
  -5 -10   2  173.28    6.90 
   4  10  -2   68.69    3.20 
   4  10  -2   73.49    3.90 
   4  10  -2   66.69    3.20 
   4  10  -2   60.09    3.30 
  -4 -10   2   71.99    3.70 
  -4 -10   2   64.89    3.40 
  -4 -10   2   63.69    3.50 
  -4 -10   2   69.79    3.70 
  -4 -10   2   66.69    3.60 
   3  10  -2   28.80    1.90 
   3  10  -2   28.20    2.40 
   3  10  -2   29.00    1.80 
  -3 -10   2   27.80    2.50 
  -3 -10   2   29.70    2.40 
  -3 -10   2   29.60    2.10 
  -3 -10   2   26.60    2.20 
  -3 -10   2   27.80    2.20 
   2  10  -2   90.49    4.50 
   2  10  -2   84.19    3.80 
  -2 -10   2   91.99    4.00 
  -2 -10   2   92.79    4.40 
  -2 -10   2   89.29    4.40 
  -2 -10   2   92.09    4.20 
   1  10  -2   75.79    3.40 
  -1 -10   2   80.19    3.80 
  -1 -10   2   73.09    3.90 
   8   9  -2   23.30    1.80 
  -8  -9   2   23.60    1.80 
  -8  -9   2   26.90    2.10 
  -8  -9   2   23.20    2.20 
   7   9  -2   33.80    2.20 
   7   9  -2   39.10    2.20 
   7   9  -2   39.10    2.60 
   7   9  -2   32.40    2.00 
  -7  -9   2   37.00    2.60 
  -7  -9   2   35.50    2.40 
  -7  -9   2   41.20    2.90 
  -7  -9   2   38.00    2.40 
  -7  -9   2   34.10    2.30 
   6   9  -2   86.19    4.40 
   6   9  -2   83.59    3.90 
   6   9  -2   87.49    4.00 
  -6  -9   2   90.59    4.50 
  -6  -9   2   86.89    4.30 
  -6  -9   2   85.89    4.20 
  -6  -9   2   86.89    4.30 
  -6  -9   2   88.19    4.70 
   5   9  -2   27.60    2.20 
   5   9  -2   28.10    2.50 
   5   9  -2   31.70    2.20 
   5   9  -2   24.90    2.50 
  -5  -9   2   32.40    2.50 
  -5  -9   2   34.40    2.60 
  -5  -9   2   36.40    3.00 
  -5  -9   2   31.10    2.90 
   4   9  -2   76.49    4.10 
   4   9  -2   82.89    3.90 
   4   9  -2   79.19    3.80 
   4   9  -2   81.19    4.60 
  -4  -9   2   76.19    4.10 
  -4  -9   2   75.19    4.30 
  -4  -9   2   78.49    4.50 
  -4  -9   2   80.59    4.30 
  -4  -9   2   76.49    4.40 
   3   9  -2   44.50    2.60 
   3   9  -2   40.40    2.80 
   3   9  -2   44.90    2.70 
   3   9  -2   42.70    3.40 
  -3  -9   2   42.70    3.20 
  -3  -9   2   42.00    3.40 
  -3  -9   2   40.60    3.20 
  -3  -9   2   37.00    3.20 
  -3  -9   2   43.20    2.90 
  -3  -9   2   42.90    3.10 
   2   9  -2    7.80    1.70 
   2   9  -2    6.50    1.20 
   2   9  -2    7.40    1.30 
  -2  -9   2    7.60    1.50 
  -2  -9   2    5.80    1.60 
  -2  -9   2    6.20    1.40 
  -2  -9   2    5.70    1.40 
  -2  -9   2    9.30    1.90 
  -2  -9   2   11.40    2.10 
   1   9  -2  207.88    8.60 
   1   9  -2  191.18    7.80 
   1   9  -2  186.38    7.60 
   1   9  -2  213.58    7.90 
  -1  -9   2  191.68    8.00 
  -1  -9   2  212.28    8.90 
  -1  -9   2  192.08    8.20 
  -1  -9   2  215.38    8.60 
   0   9  -2   72.99    4.00 
   0   9  -2   76.89    3.60 
   0   9  -2   76.89    3.50 
   0  -9   2   74.19    3.70 
   0  -9   2   79.09    4.20 
   0  -9   2   60.99    3.50 
   0  -9   2   80.69    4.50 
  -1   9  -2   69.69    3.30 
   1  -9   2   74.49    3.80 
   1  -9   2   69.39    3.60 
   1  -9   2   74.49    4.00 
   9   8  -2    8.50    1.00 
  -9  -8   2    5.50    1.40 
   8   8  -2  212.28    8.50 
   8   8  -2  218.88    8.30 
   8   8  -2  215.18    8.40 
  -8  -8   2  229.28    8.90 
  -8  -8   2  218.18    8.60 
  -8  -8   2  224.28    8.60 
   7   8  -2   70.09    3.70 
   7   8  -2   77.59    4.00 
   7   8  -2   68.39    3.40 
   7   8  -2   67.69    3.50 
  -7  -8   2   74.19    4.10 
  -7  -8   2   73.89    4.30 
  -7  -8   2   66.49    3.70 
  -7  -8   2   71.19    3.90 
  -7  -8   2   67.19    3.70 
   6   8  -2  265.07    9.80 
   6   8  -2  255.57    9.70 
   6   8  -2  258.67   10.10 
   6   8  -2  248.78    9.90 
  -6  -8   2  252.77   10.10 
  -6  -8   2  243.98   10.10 
  -6  -8   2  252.47   10.40 
  -6  -8   2  262.47   10.20 
  -6  -8   2  259.57   10.60 
   5   8  -2  361.16   13.40 
   5   8  -2  376.66   13.90 
   5   8  -2  357.36   14.10 
   5   8  -2  371.86   13.50 
   5   8  -2  340.57   12.80 
  -5  -8   2  389.06   14.00 
  -5  -8   2  364.36   14.30 
  -5  -8   2  363.56   13.90 
  -5  -8   2  361.56   14.20 
   4   8  -2  393.86   16.40 
   4   8  -2  430.66   15.40 
   4   8  -2  430.16   16.30 
   4   8  -2  444.56   15.80 
   4   8  -2  411.26   14.80 
   4   8  -2  436.76   15.40 
  -4  -8   2  426.16   15.80 
  -4  -8   2  390.56   16.30 
  -4  -8   2  406.96   15.50 
  -4  -8   2  432.66   15.90 
  -4  -8   2  441.16   16.20 
  -4  -8   2  401.46   15.90 
  -4  -8   2  434.86   16.20 
   3   8  -2  196.88    8.30 
   3   8  -2  188.28    9.20 
   3   8  -2  199.58    8.10 
   3   8  -2  219.48    8.20 
   3   8  -2  195.08    7.50 
   3   8  -2  214.08    9.10 
  -3  -8   2  209.48    8.50 
  -3  -8   2  210.88    8.90 
  -3  -8   2  203.78    8.80 
  -3  -8   2  192.58    9.00 
  -3  -8   2  205.48    8.60 
  -3  -8   2  202.88    8.70 
   2   8  -2  241.08   10.20 
   2   8  -2  239.98    9.20 
   2   8  -2  232.18   10.60 
   2   8  -2  239.18    9.20 
  -2  -8   2  245.98   10.10 
  -2  -8   2  227.88    9.80 
  -2  -8   2  232.28    9.50 
  -2  -8   2  232.28   10.30 
  -2  -8   2  242.98    9.80 
  -2  -8   2  225.28   11.10 
   1   8  -2   52.59    3.70 
   1   8  -2   47.70    2.80 
   1   8  -2   49.50    3.00 
   1   8  -2   46.40    4.00 
   1   8  -2   50.59    2.90 
  -1  -8   2   46.60    3.40 
  -1  -8   2   55.19    3.80 
  -1  -8   2   52.29    4.00 
  -1  -8   2   46.80    3.10 
  -1  -8   2   45.20    4.30 
  -1  -8   2   52.09    3.40 
   0   8  -2   75.99    3.90 
   0   8  -2   74.99    3.70 
   0   8  -2   70.39    4.90 
   0   8  -2   72.59    4.50 
   0  -8   2   81.79    4.70 
   0  -8   2   73.29    5.40 
   0  -8   2   78.49    4.90 
   0  -8   2   67.69    3.80 
   0  -8   2   70.69    4.10 
  -1   8  -2  130.19    6.30 
  -1   8  -2  152.88    6.20 
  -1   8  -2  138.49    5.80 
   1  -8   2  148.79    7.00 
   1  -8   2  121.79    5.90 
   1  -8   2  139.59    6.50 
   1  -8   2  146.19    6.70 
  -2   8  -2  133.59    5.50 
  -2   8  -2  137.49    5.80 
   2  -8   2  139.39    6.30 
   2  -8   2  141.89    6.30 
   2  -8   2  142.09    6.60 
   3  -8   2  217.78    9.40 
   3  -8   2  276.17   10.80 
   9   7  -2   16.40    1.50 
   9   7  -2   17.70    1.70 
  -9  -7   2   17.60    1.80 
  -9  -7   2   17.00    1.70 
   8   7  -2  437.86   15.30 
   8   7  -2  434.56   15.50 
   8   7  -2  388.06   15.30 
  -8  -7   2  426.76   15.90 
  -8  -7   2  425.96   15.70 
  -8  -7   2  432.86   15.70 
   7   7  -2  386.56   14.60 
   7   7  -2  399.26   14.60 
   7   7  -2  402.06   14.40 
  -7  -7   2  387.96   14.60 
  -7  -7   2  405.96   15.00 
  -7  -7   2  382.06   14.70 
  -7  -7   2  398.16   15.10 
  -7  -7   2  374.26   14.50 
   6   7  -2   80.69    4.30 
   6   7  -2   81.09    4.00 
   6   7  -2   79.29    3.50 
   6   7  -2   78.69    3.80 
  -6  -7   2   78.49    4.60 
  -6  -7   2   75.39    4.10 
  -6  -7   2   81.89    4.70 
  -6  -7   2   76.09    4.30 
  -6  -7   2   80.69    4.30 
   5   7  -2  173.48    7.10 
   5   7  -2  175.38    7.50 
   5   7  -2  175.88    6.70 
   5   7  -2  181.38    7.10 
   5   7  -2  168.58    9.20 
  -5  -7   2  165.98    7.40 
  -5  -7   2  171.48    7.50 
  -5  -7   2  173.78    7.80 
  -5  -7   2  180.18    7.50 
  -5  -7   2  175.88    7.90 
   4   7  -2  310.97   12.80 
   4   7  -2  343.67   11.80 
   4   7  -2  315.67   13.30 
   4   7  -2  315.27   11.90 
   4   7  -2  335.07   12.20 
   4   7  -2  320.27   14.50 
   4   7  -2  336.07   12.60 
   4   7  -2  343.67   12.30 
  -4  -7   2  325.47   12.70 
  -4  -7   2  324.07   13.10 
  -4  -7   2  343.37   12.70 
  -4  -7   2  332.57   13.00 
  -4  -7   2  330.87   13.00 
  -4  -7   2  331.97   13.00 
  -4  -7   2  321.77   12.50 
  -4  -7   2  328.87   12.70 
   3   7  -2  359.06   13.00 
   3   7  -2  337.07   15.30 
   3   7  -2  366.26   13.10 
   3   7  -2  343.17   12.70 
   3   7  -2  349.47   14.30 
   3   7  -2  351.46   12.60 
   3   7  -2  352.06   13.90 
  -3  -7   2  362.06   13.80 
  -3  -7   2  358.76   13.40 
  -3  -7   2  358.96   13.50 
  -3  -7   2  359.46   13.80 
  -3  -7   2  346.37   14.00 
  -3  -7   2  353.66   13.60 
  -3  -7   2  347.47   14.60 
   2   7  -2   54.59    2.90 
   2   7  -2   52.09    3.80 
   2   7  -2   52.59    2.60 
   2   7  -2   51.99    4.00 
   2   7  -2   54.49    3.00 
   2   7  -2   51.59    4.60 
  -2  -7   2   51.89    3.60 
  -2  -7   2   48.70    3.60 
  -2  -7   2   51.59    4.30 
  -2  -7   2   52.79    3.70 
  -2  -7   2   50.99    3.20 
  -2  -7   2   52.29    3.50 
  -2  -7   2   52.99    3.40 
   1   7  -2  357.16   13.30 
   1   7  -2  367.16   14.30 
   1   7  -2  374.46   14.80 
   1   7  -2  357.66   13.30 
   1   7  -2  360.46   12.70 
   1   7  -2  355.56   15.60 
  -1  -7   2  346.27   14.20 
  -1  -7   2  377.86   14.20 
  -1  -7   2  355.96   15.30 
  -1  -7   2  354.36   13.70 
  -1  -7   2  366.46   13.60 
  -1  -7   2  336.77   13.70 
  -1  -7   2  364.06   14.50 
   0   7  -2   46.70    2.80 
   0   7  -2   47.10    4.00 
   0   7  -2   48.20    3.10 
   0   7  -2   50.69    3.60 
   0   7  -2   44.00    4.20 
   0  -7   2   44.40    3.40 
   0  -7   2   41.40    3.40 
   0  -7   2   46.30    3.20 
   0  -7   2   39.50    2.90 
   0  -7   2   43.20    4.10 
   0  -7   2   43.40    3.70 
   0  -7   2   48.90    3.60 
  -1   7  -2  126.79    5.80 
  -1   7  -2  121.99    6.20 
  -1   7  -2  126.09    7.00 
  -1   7  -2  127.19    5.50 
   1  -7   2  124.89    5.80 
   1  -7   2  129.69    6.40 
   1  -7   2  130.29    7.60 
   1  -7   2  114.59    5.50 
   1  -7   2  122.39    6.30 
   1  -7   2  123.59    6.60 
  -2   7  -2   14.00    1.70 
  -2   7  -2   14.70    1.60 
  -2   7  -2   16.90    2.80 
   2  -7   2   15.30    3.00 
   2  -7   2   19.70    2.60 
   2  -7   2   13.20    2.20 
  -3   7  -2   28.20    2.10 
  -3   7  -2   29.80    2.40 
   3  -7   2   29.10    2.90 
   3  -7   2   28.00    2.90 
  -4   7  -2   90.49    3.90 
  -4   7  -2   97.39    4.20 
   4  -7   2   98.19    4.70 
   4  -7   2  107.69    5.00 
   4  -7   2  103.99    4.80 
   9   6  -2   51.79    2.80 
   9   6  -2   47.50    2.90 
  -9  -6   2   54.09    3.00 
  -9  -6   2   51.89    2.80 
  -9  -6   2   50.79    3.10 
   8   6  -2    5.00    1.30 
   8   6  -2    7.90    1.40 
  -8  -6   2    5.50    1.50 
  -8  -6   2    5.00    1.20 
  -8  -6   2    6.30    1.50 
  -8  -6   2    8.60    1.70 
   7   6  -2  249.08    9.60 
   7   6  -2  255.47    9.90 
   7   6  -2  233.68    9.70 
   7   6  -2  247.28    9.10 
  -7  -6   2  247.68    9.80 
  -7  -6   2  259.67   10.10 
  -7  -6   2  257.37   10.30 
  -7  -6   2  235.48    9.60 
  -7  -6   2  248.08   10.30 
   6   6  -2  290.27   11.10 
   6   6  -2  296.07   11.60 
   6   6  -2  306.17   10.90 
   6   6  -2  313.07   11.40 
   6   6  -2  279.17   13.40 
   6   6  -2  298.47   11.10 
  -6  -6   2  300.17   11.80 
  -6  -6   2  310.87   11.70 
  -6  -6   2  309.67   12.20 
  -6  -6   2  306.87   11.70 
  -6  -6   2  311.87   12.10 
   5   6  -2    2.80    1.20 
   5   6  -2    2.60    0.80 
   5   6  -2    1.30    0.80 
   5   6  -2    2.90    0.80 
   5   6  -2   -0.40    7.20 
   5   6  -2    3.20    1.80 
   5   6  -2    1.20    0.80 
  -5  -6   2    3.30    1.30 
  -5  -6   2    2.30    1.00 
  -5  -6   2    3.20    1.80 
  -5  -6   2    2.00    1.30 
  -5  -6   2    2.00    1.10 
  -5  -6   2    2.70    1.10 
   4   6  -2  329.07   13.10 
   4   6  -2  327.97   13.30 
   4   6  -2  357.26   14.80 
   4   6  -2  345.37   12.50 
   4   6  -2  361.06   12.20 
   4   6  -2  350.46   12.30 
   4   6  -2  347.87   12.60 
  -4  -6   2  334.57   13.20 
  -4  -6   2  351.66   13.00 
  -4  -6   2  345.67   12.90 
  -4  -6   2  354.26   13.00 
  -4  -6   2  331.07   13.00 
  -4  -6   2  332.97   13.20 
  -4  -6   2  350.46   13.50 
  -4  -6   2  338.87   13.40 
   3   6  -2  240.18    9.10 
   3   6  -2  267.07   10.70 
   3   6  -2  256.57    9.50 
   3   6  -2  253.17    9.20 
   3   6  -2  253.07    9.40 
   3   6  -2  247.78   10.20 
   3   6  -2  277.17   11.70 
   3   6  -2  247.68   10.10 
  -3  -6   2  248.18   10.10 
  -3  -6   2  247.68   10.70 
  -3  -6   2  247.08    9.70 
  -3  -6   2  254.57   10.00 
  -3  -6   2  249.28    9.80 
  -3  -6   2  250.17   10.10 
  -3  -6   2  246.28   10.00 
  -3  -6   2  255.37   10.40 
  -3  -6   2  240.58    9.70 
   2   6  -2  416.26   16.30 
   2   6  -2  405.16   15.40 
   2   6  -2  400.06   13.80 
   2   6  -2  414.66   14.00 
   2   6  -2  390.26   14.10 
   2   6  -2  397.26   15.00 
   2   6  -2  396.36   14.90 
  -2  -6   2  386.46   14.40 
  -2  -6   2  362.76   14.90 
  -2  -6   2  373.06   14.70 
  -2  -6   2  373.76   14.10 
  -2  -6   2  376.36   14.50 
  -2  -6   2  414.66   15.80 
  -2  -6   2  381.96   14.70 
  -2  -6   2  405.96   14.90 
   1   6  -2   68.19    3.20 
   1   6  -2   71.89    4.10 
   1   6  -2   65.39    3.30 
   1   6  -2   69.99    3.50 
   1   6  -2   66.79    4.80 
   1   6  -2   67.99    3.10 
   1   6  -2   75.09    4.50 
   1   6  -2   67.49    3.90 
  -1  -6   2   68.19    4.10 
  -1  -6   2   67.89    3.70 
  -1  -6   2   68.29    3.90 
  -1  -6   2   70.49    4.00 
  -1  -6   2   76.49    3.70 
  -1  -6   2   71.19    4.70 
  -1  -6   2   63.19    3.80 
  -1  -6   2   63.49    3.70 
  -1  -6   2   68.99    3.30 
   0   6  -2   27.90    1.80 
   0   6  -2   31.80    2.10 
   0   6  -2   29.40    2.30 
   0   6  -2   32.40    3.20 
   0   6  -2   30.10    3.30 
   0   6  -2   26.90    2.50 
   0  -6   2   29.10    2.80 
   0  -6   2   28.30    2.10 
   0  -6   2   28.00    2.20 
   0  -6   2   32.70    2.40 
   0  -6   2   30.00    2.60 
   0  -6   2   31.10    2.70 
   0  -6   2   32.90    3.30 
  -1   6  -2   36.90    3.00 
  -1   6  -2   36.40    3.70 
  -1   6  -2   37.10    2.40 
  -1   6  -2   37.00    3.60 
  -1   6  -2   35.50    2.00 
  -1   6  -2   40.40    2.80 
   1  -6   2   35.50    2.70 
   1  -6   2   33.70    2.40 
   1  -6   2   36.00    3.70 
   1  -6   2   33.60    3.00 
   1  -6   2   34.90    3.30 
   1  -6   2   35.10    2.40 
   1  -6   2   35.30    3.00 
  -2   6  -2   31.10    2.40 
  -2   6  -2   31.70    2.90 
  -2   6  -2   30.80    3.40 
  -2   6  -2   32.60    2.70 
  -2   6  -2   32.30    2.60 
   2  -6   2   27.20    3.00 
   2  -6   2   30.20    2.50 
   2  -6   2   34.00    2.50 
   2  -6   2   30.30    3.80 
   2  -6   2   29.40    3.20 
  -3   6  -2  203.78    9.70 
  -3   6  -2  213.98    8.40 
  -3   6  -2  191.18    8.50 
  -3   6  -2  205.68    8.10 
   3  -6   2  214.28    9.40 
   3  -6   2  209.08    9.00 
   3  -6   2  204.08    8.20 
   3  -6   2  198.18   10.20 
  -4   6  -2  132.69    5.70 
  -4   6  -2  122.89    5.90 
  -4   6  -2  135.29    5.50 
   4  -6   2  143.09    6.40 
   4  -6   2  138.19    6.80 
   4  -6   2  123.29    5.50 
  -5   6  -2   11.30    1.10 
  -5   6  -2    9.40    1.30 
  -5   6  -2   10.50    1.20 
   5  -6   2    7.60    1.40 
   5  -6   2   13.60    1.90 
   9   5  -2   56.99    3.10 
   9   5  -2   52.29    3.00 
   9   5  -2   57.29    3.00 
  -9  -5   2   48.00    2.90 
  -9  -5   2   49.20    3.00 
  -9  -5   2   57.19    3.10 
  -9  -5   2   58.39    3.30 
   8   5  -2  197.48    7.90 
   8   5  -2  183.68    7.70 
   8   5  -2  188.98    7.60 
  -8  -5   2  198.38    8.10 
  -8  -5   2  196.78    8.20 
  -8  -5   2  190.88    7.90 
  -8  -5   2  177.88    8.30 
   7   5  -2  447.66   16.10 
   7   5  -2  458.65   15.90 
   7   5  -2  407.66   15.80 
   7   5  -2  439.56   15.30 
  -7  -5   2  422.26   16.60 
  -7  -5   2  442.86   16.30 
  -7  -5   2  443.56   16.10 
  -7  -5   2  420.46   16.40 
  -7  -5   2  411.46   15.90 
  -7  -5   2  453.05   16.50 
   6   5  -2  328.77   14.50 
   6   5  -2  322.97   12.20 
   6   5  -2  335.77   12.60 
   6   5  -2  349.27   12.50 
   6   5  -2  347.67   12.10 
  -6  -5   2  334.37   13.20 
  -6  -5   2  353.46   13.20 
  -6  -5   2  345.47   13.30 
  -6  -5   2  320.67   12.60 
  -6  -5   2  321.27   12.60 
  -6  -5   2  347.67   13.10 
  -6  -5   2  346.97   12.90 
  -6  -5   2  337.37   12.70 
   5   5  -2  176.98    6.50 
   5   5  -2  165.78    6.60 
   5   5  -2  165.08    6.90 
   5   5  -2  167.08    7.30 
   5   5  -2  168.68    8.50 
   5   5  -2  169.98    6.40 
   5   5  -2  167.18    6.70 
  -5  -5   2  164.68    6.90 
  -5  -5   2  168.48    7.30 
  -5  -5   2  173.08    7.20 
  -5  -5   2  170.38    7.10 
  -5  -5   2  171.78    7.40 
  -5  -5   2  170.28    7.40 
  -5  -5   2  172.18    7.60 
  -5  -5   2  174.08    7.40 
   4   5  -2  345.07   13.50 
   4   5  -2  350.66   12.80 
   4   5  -2  352.96   12.80 
   4   5  -2  353.86   12.60 
   4   5  -2  381.66   14.90 
   4   5  -2  353.06   13.50 
   4   5  -2  369.06   12.70 
  -4  -5   2  359.36   13.30 
  -4  -5   2  352.96   13.50 
  -4  -5   2  353.56   13.20 
  -4  -5   2  368.96   13.50 
  -4  -5   2  354.06   13.70 
  -4  -5   2  362.96   13.20 
   3   5  -2 1136.99   39.80 
   3   5  -2 1167.18   41.00 
   3   5  -2 1175.48   38.90 
  -3  -5   2 1111.09   39.80 
   2   5  -2 1016.90   34.30 
   2   5  -2  947.11   42.30 
   2   5  -2 1044.70   35.20 
   2   5  -2 1042.30   36.30 
  -2  -5   2 1014.10   35.70 
  -2  -5   2  975.10   35.50 
  -2  -5   2 1022.70   34.40 
  -2  -5   2 1006.30   35.00 
   1   5  -2  193.78    8.90 
   1   5  -2  193.08    7.10 
   1   5  -2  189.38    7.90 
   1   5  -2  199.68    8.30 
  -1  -5   2  198.58    8.00 
  -1  -5   2  193.98    7.40 
  -1  -5   2  188.98    8.40 
  -1  -5   2  199.38    8.70 
   0   5  -2   44.60    3.20 
   0   5  -2   40.80    2.80 
   0   5  -2   43.40    2.80 
   0   5  -2   44.30    2.20 
   0   5  -2   47.20    3.60 
   0   5  -2   31.50    7.60 
   0   5  -2   28.30    3.00 
   0  -5   2   39.50    3.10 
   0  -5   2   45.50    2.90 
   0  -5   2   42.10    3.00 
   0  -5   2   46.30    3.50 
   0  -5   2   41.30    2.30 
  -1   5  -2   69.19    3.60 
  -1   5  -2   73.09    3.40 
  -1   5  -2   68.19    3.80 
  -1   5  -2   70.79    4.70 
  -1   5  -2   77.29    4.60 
  -1   5  -2   69.79    3.20 
  -1   5  -2   74.09    3.10 
   1  -5   2   75.39    3.50 
   1  -5   2   74.09    4.10 
   1  -5   2   72.79    4.20 
   1  -5   2   67.59    3.50 
   1  -5   2   73.29    4.00 
   1  -5   2   74.79    4.90 
   1  -5   2   70.99    3.70 
  -2   5  -2  519.75   17.80 
  -2   5  -2  478.75   19.40 
  -2   5  -2  480.95   18.10 
  -2   5  -2  473.75   17.10 
  -2   5  -2  532.05   19.40 
  -2   5  -2  507.55   17.90 
   2  -5   2  494.35   17.70 
   2  -5   2  498.95   18.70 
   2  -5   2  477.75   18.40 
   2  -5   2  482.65   17.90 
   2  -5   2  487.65   18.80 
   2  -5   2  514.45   19.90 
  -3   5  -2 2665.03   90.19 
  -3   5  -2 2651.53   89.99 
  -3   5  -2 2569.14   90.49 
  -3   5  -2 2792.92   91.99 
   3  -5   2 2729.13   90.89 
   3  -5   2 2722.23   91.29 
   3  -5   2 2558.84   89.99 
   3  -5   2 2605.94   92.29 
  -4   5  -2  551.24   19.50 
  -4   5  -2  549.05   19.70 
  -4   5  -2  544.05   20.30 
  -4   5  -2  549.35   21.40 
   4  -5   2  533.05   19.60 
   4  -5   2  540.55   20.50 
   4  -5   2  562.64   20.90 
  -5   5  -2  119.69    5.90 
  -5   5  -2  120.09    5.30 
  -5   5  -2  123.59    5.40 
  -5   5  -2  127.49    6.00 
   5  -5   2  128.99    6.40 
   5  -5   2  129.39    6.30 
   5  -5   2  129.89    5.50 
  -6   5  -2   20.50    2.00 
  -6   5  -2   19.90    1.80 
  -6   5  -2   14.30    1.30 
   6  -5   2   16.50    1.50 
   6  -5   2   19.80    2.10 
   6  -5   2   18.50    2.00 
   9   4  -2   71.79    3.70 
   9   4  -2   74.49    3.70 
   9   4  -2   75.79    3.70 
  -9  -4   2   70.89    3.60 
  -9  -4   2   81.99    4.10 
  -9  -4   2   72.89    3.80 
  -9  -4   2   74.19    3.80 
   8   4  -2  138.79    5.90 
   8   4  -2  141.29    6.00 
   8   4  -2  127.79    6.60 
   8   4  -2  139.49    6.10 
  -8  -4   2  138.49    6.40 
  -8  -4   2  132.19    6.50 
  -8  -4   2  130.79    6.10 
  -8  -4   2  141.39    6.20 
   7   4  -2   65.99    3.10 
   7   4  -2   61.99    3.60 
   7   4  -2   68.29    3.50 
   7   4  -2   62.39    4.10 
  -7  -4   2   71.19    4.20 
  -7  -4   2   65.09    3.80 
  -7  -4   2   70.69    3.90 
  -7  -4   2   70.49    4.10 
  -7  -4   2   66.19    4.20 
   6   4  -2  796.22   30.10 
   6   4  -2  836.12   31.60 
   6   4  -2  873.91   30.30 
   6   4  -2  887.31   29.60 
   6   4  -2  892.21   29.80 
   6   4  -2  725.33   31.00 
   6   4  -2  896.91   29.30 
   6   4  -2  867.11   29.20 
  -6  -4   2  853.21   30.40 
  -6  -4   2  874.11   30.00 
  -6  -4   2  823.92   30.10 
  -6  -4   2  841.12   30.10 
  -6  -4   2  854.91   29.70 
  -6  -4   2  857.01   29.80 
  -6  -4   2  897.41   30.50 
   5   4  -2  432.46   15.00 
   5   4  -2  420.96   15.90 
   5   4  -2  440.46   15.10 
   5   4  -2  443.96   17.20 
   5   4  -2  418.06   15.40 
   5   4  -2  433.36   15.20 
  -5  -4   2  421.66   15.50 
  -5  -4   2  454.25   16.00 
  -5  -4   2  436.56   16.10 
  -5  -4   2  404.16   18.70 
  -5  -4   2  435.06   16.00 
  -5  -4   2  423.16   15.50 
  -5  -4   2  423.66   15.60 
  -5  -4   2  430.26   15.80 
  -5  -4   2  423.06   15.90 
  -5  -4   2  421.46   15.50 
   4   4  -2   70.99    3.80 
   4   4  -2   78.99    3.20 
   4   4  -2   76.89    4.60 
   4   4  -2   73.99    3.80 
  -4  -4   2   74.89    3.80 
  -4  -4   2   73.29    5.40 
   3   4  -2  114.79    4.30 
   3   4  -2  106.79    4.80 
   3   4  -2  109.09    4.90 
   3   4  -2  118.49    5.80 
  -3  -4   2  113.99    4.80 
  -3  -4   2  106.99    6.40 
  -3  -4   2  108.49    4.80 
   2   4  -2  434.66   15.80 
   2   4  -2  449.26   16.10 
   2   4  -2  457.45   17.00 
   2   4  -2  508.65   22.50 
   2   4  -2  442.16   15.40 
  -2  -4   2  422.36   16.40 
  -2  -4   2  441.66   15.50 
  -2  -4   2  435.06   15.90 
  -2  -4   2  447.26   16.30 
   1   4  -2  979.40   33.40 
   1   4  -2  916.41   32.70 
   1   4  -2  970.70   34.20 
  -1  -4   2  964.30   34.00 
  -1  -4   2  988.90   32.90 
  -1  -4   2  970.30   33.80 
  -1  -4   2  985.50   33.40 
   0   4  -2 2588.54   86.69 
   0   4  -2 2567.24   85.59 
   0   4  -2 2467.25   86.39 
   0   4  -2 2542.75   86.19 
   0   4  -2 2629.74   87.19 
   0  -4   2 2584.74   86.39 
   0  -4   2 2552.34   85.79 
   0  -4   2 2485.05   86.99 
   0  -4   2 2565.74   86.89 
  -1   4  -2  971.30   31.40 
  -1   4  -2  799.22   37.90 
  -1   4  -2  929.71   32.00 
  -1   4  -2  904.51   32.20 
  -1   4  -2  951.10   32.60 
  -1   4  -2  892.11   32.10 
  -1   4  -2  956.40   33.00 
   1  -4   2  918.81   32.70 
   1  -4   2  941.01   33.00 
   1  -4   2  953.20   32.30 
  -2   4  -2  463.55   25.20 
  -2   4  -2  519.75   19.60 
  -2   4  -2  553.24   20.30 
  -2   4  -2  536.35   19.10 
  -2   4  -2  528.45   19.20 
  -2   4  -2  540.05   19.30 
  -2   4  -2  549.74   18.90 
  -2   4  -2  527.65   19.50 
  -2   4  -2  580.44   20.30 
  -2   4  -2  557.94   18.70 
  -2   4  -2  529.75   18.60 
   2  -4   2  520.65   19.90 
   2  -4   2  580.34   19.80 
   2  -4   2  493.15   20.00 
   2  -4   2  529.65   19.50 
   2  -4   2  555.54   19.90 
   2  -4   2  522.65   19.00 
   2  -4   2  602.14   20.90 
  -3   4  -2  406.66   15.40 
  -3   4  -2  414.86   14.80 
  -3   4  -2  414.96   15.00 
  -3   4  -2  437.96   16.40 
  -3   4  -2  370.86   14.20 
   3  -4   2  404.06   15.80 
   3  -4   2  433.46   16.80 
   3  -4   2  402.46   14.90 
   3  -4   2  405.26   15.50 
  -4   4  -2  293.37   12.50 
  -4   4  -2  279.57   10.90 
  -4   4  -2  272.77   11.40 
  -4   4  -2  290.37   10.80 
  -4   4  -2  293.37   11.60 
   4  -4   2  283.87   10.90 
   4  -4   2  287.77   11.70 
   4  -4   2  281.17   11.90 
   4  -4   2  287.07   12.70 
  -5   4  -2  176.98    8.00 
  -5   4  -2  179.58    7.40 
  -5   4  -2  188.48    8.20 
  -5   4  -2  184.88    9.00 
  -5   4  -2  182.48    7.50 
   5  -4   2  187.58    7.60 
   5  -4   2  178.78    8.30 
   5  -4   2  182.08    8.40 
  -6   4  -2   66.69    3.20 
  -6   4  -2   66.69    4.00 
  -6   4  -2   61.69    3.90 
   6  -4   2   67.99    3.60 
   6  -4   2   60.39    4.00 
   6  -4   2   67.49    4.20 
  -7   4  -2   41.90    3.50 
  -7   4  -2   57.39    3.00 
   7  -4   2   52.39    2.60 
   7  -4   2   53.79    3.20 
   9   3  -2   68.39    3.50 
   9   3  -2   69.79    3.50 
   9   3  -2   68.99    3.60 
  -9  -3   2   72.49    4.00 
  -9  -3   2   73.19    3.70 
  -9  -3   2   71.49    3.70 
   8   3  -2  191.58    7.80 
   8   3  -2  183.88    8.60 
   8   3  -2  192.98    7.70 
   8   3  -2  191.18    7.80 
  -8  -3   2  194.88    7.90 
  -8  -3   2  189.18    8.20 
  -8  -3   2  180.38    8.20 
  -8  -3   2  188.28    7.80 
   7   3  -2  110.59    5.10 
   7   3  -2  116.19    5.00 
   7   3  -2  113.69    4.60 
   7   3  -2   99.39    6.60 
   7   3  -2  111.79    5.90 
  -7  -3   2  110.49    6.10 
  -7  -3   2  106.09    5.20 
  -7  -3   2  112.39    5.30 
  -7  -3   2  114.09    5.70 
  -7  -3   2  114.59    5.70 
   6   3  -2  425.76   15.20 
   6   3  -2  424.26   14.90 
   6   3  -2  434.66   16.10 
   6   3  -2  401.06   15.00 
   6   3  -2  394.66   16.80 
   6   3  -2  435.16   14.80 
   6   3  -2  414.16   17.00 
   6   3  -2  446.16   15.40 
  -6  -3   2  421.76   15.70 
  -6  -3   2  412.56   15.70 
  -6  -3   2  434.06   16.00 
  -6  -3   2  403.96   15.40 
  -6  -3   2  408.76   15.40 
  -6  -3   2  431.46   16.00 
  -6  -3   2  424.46   16.50 
   5   3  -2 1339.87   45.30 
   5   3  -2 1327.77   46.20 
   5   3  -2 1264.17   45.60 
   5   3  -2 1313.47   44.40 
   5   3  -2 1321.47   44.40 
   5   3  -2 1307.77   45.20 
  -5  -3   2 1409.16   45.50 
  -5  -3   2 1239.98   44.90 
  -5  -3   2 1231.98   44.80 
  -5  -3   2 1286.37   45.30 
  -5  -3   2 1354.66   45.80 
  -5  -3   2 1293.37   48.80 
  -5  -3   2 1361.26   45.30 
   4   3  -2  685.93   22.80 
   4   3  -2  680.13   23.70 
   4   3  -2  643.74   24.00 
   4   3  -2  684.63   23.50 
   4   3  -2  660.23   22.80 
   4   3  -2  670.93   24.50 
   4   3  -2  637.84   23.40 
  -4  -3   2  688.83   23.50 
  -4  -3   2  637.04   26.00 
  -4  -3   2  699.03   24.00 
   3   3  -2 1539.55   50.29 
   3   3  -2 1468.05   49.50 
   3   3  -2 1565.34   50.29 
   3   3  -2 1345.67   49.90 
   3   3  -2 1459.95   50.29 
   3   3  -2 1551.84   51.19 
  -3  -3   2 1498.55   50.19 
  -3  -3   2 1520.15   52.39 
  -3  -3   2 1338.57   49.99 
   2   3  -2 2266.67   74.29 
   2   3  -2 2104.29   73.29 
   2   3  -2 2034.60   72.69 
   2   3  -2 2357.66   73.49 
  -2  -3   2 2167.58   72.89 
  -2  -3   2 2230.08   75.19 
  -2  -3   2 2188.48   73.49 
  -2  -3   2 2088.89   73.09 
  -2  -3   2 2153.78   73.29 
   1   3  -2 1151.38   41.50 
   1   3  -2 1268.47   42.60 
   1   3  -2 1295.57   41.90 
   1   3  -2 1376.36   46.90 
  -1  -3   2 1213.08   42.10 
  -1  -3   2 1237.48   41.40 
  -1  -3   2 1126.49   42.10 
  -1  -3   2 1183.48   41.80 
   0   3  -2  141.29    6.10 
   0   3  -2  133.89    5.70 
   0   3  -2  144.69    9.50 
   0   3  -2  144.79    5.50 
   0  -3   2  128.89    5.90 
   0  -3   2  136.69    5.50 
   0  -3   2  134.79    5.10 
   0  -3   2  141.29    5.90 
  -1   3  -2 1599.84   56.69 
  -1   3  -2 1669.13   56.29 
  -1   3  -2 1661.03   55.99 
  -1   3  -2 1821.12   61.69 
  -1   3  -2 1607.64   56.49 
   1  -3   2 1667.53   55.79 
   1  -3   2 1585.24   56.79 
   1  -3   2 1630.34   56.29 
   1  -3   2 1660.23   56.59 
  -2   3  -2 1313.27   42.70 
  -2   3  -2 1219.28   41.80 
  -2   3  -2 1041.00   46.90 
  -2   3  -2 1217.78   42.20 
  -2   3  -2 1296.17   43.00 
  -2   3  -2 1234.58   42.30 
  -2   3  -2 1194.68   42.90 
  -2   3  -2 1279.37   42.60 
   2  -3   2 1286.47   43.40 
   2  -3   2 1302.97   42.60 
   2  -3   2 1231.58   43.00 
  -3   3  -2  370.16   13.90 
  -3   3  -2  348.47   13.40 
  -3   3  -2  344.97   13.50 
  -3   3  -2  350.96   13.00 
  -3   3  -2  363.76   13.90 
   3  -3   2  351.06   14.10 
   3  -3   2  341.27   13.70 
  -4   3  -2  351.16   14.30 
  -4   3  -2  390.96   14.60 
  -4   3  -2  380.16   14.70 
  -4   3  -2  363.86   13.80 
  -4   3  -2  360.26   14.70 
  -4   3  -2  383.76   13.80 
  -4   3  -2  383.16   14.20 
  -4   3  -2  414.26   15.30 
   4  -3   2  372.76   13.70 
   4  -3   2  370.06   14.70 
   4  -3   2  372.96   15.30 
   4  -3   2  397.56   14.60 
   4  -3   2  386.16   13.90 
  -5   3  -2   42.00    3.00 
  -5   3  -2   48.10    2.80 
  -5   3  -2   43.40    3.80 
  -5   3  -2   44.10    3.20 
  -5   3  -2   42.40    2.90 
  -5   3  -2   44.50    3.40 
   5  -3   2   43.60    3.50 
   5  -3   2   44.20    3.50 
   5  -3   2   37.10    2.50 
   5  -3   2   49.30    3.00 
  -6   3  -2  272.87   11.50 
  -6   3  -2  296.37   10.80 
  -6   3  -2  288.47   11.70 
  -6   3  -2  272.17   11.10 
  -6   3  -2  278.07   12.40 
   6  -3   2  293.27   11.80 
   6  -3   2  279.57   11.70 
   6  -3   2  304.37   11.10 
  -7   3  -2   66.89    3.90 
  -7   3  -2   65.89    3.20 
  -7   3  -2   64.99    3.90 
   7  -3   2   75.79    3.70 
   7  -3   2   65.79    3.90 
   7  -3   2   70.59    4.20 
   9   2  -2    1.60    0.90 
   9   2  -2    1.60    1.00 
  -9  -2   2   -0.20    0.80 
  -9  -2   2    1.70    1.10 
  -9  -2   2    1.40    1.00 
  -9  -2   2    1.80    1.20 
   8   2  -2   17.90    1.90 
   8   2  -2   17.10    2.70 
   8   2  -2   16.20    1.90 
   8   2  -2   15.50    1.90 
  -8  -2   2   18.30    2.20 
  -8  -2   2   18.50    2.20 
  -8  -2   2   19.70    2.10 
  -8  -2   2   19.10    2.30 
   7   2  -2   39.10    4.20 
   7   2  -2   41.00    2.30 
   7   2  -2   41.90    2.60 
   7   2  -2   41.50    3.50 
   7   2  -2   35.50    2.50 
   7   2  -2   44.80    3.00 
  -7  -2   2   39.20    3.20 
  -7  -2   2   38.40    3.00 
  -7  -2   2   39.20    2.70 
  -7  -2   2   39.10    3.20 
  -7  -2   2   41.60    3.50 
  -7  -2   2   41.50    2.90 
   6   2  -2   97.39    4.00 
   6   2  -2   98.29    4.20 
   6   2  -2   97.19    6.00 
   6   2  -2   94.39    4.30 
   6   2  -2  102.59    5.30 
   6   2  -2   91.19    4.20 
   6   2  -2   94.39    4.40 
  -6  -2   2   98.69    5.40 
  -6  -2   2   94.39    4.50 
  -6  -2   2   98.49    4.90 
  -6  -2   2   99.89    4.70 
  -6  -2   2  100.19    5.20 
  -6  -2   2   96.49    5.00 
  -6  -2   2   95.19    4.70 
   5   2  -2   68.29    4.40 
   5   2  -2   65.29    3.40 
   5   2  -2   64.09    3.60 
   5   2  -2   64.19    3.70 
   5   2  -2   65.59    2.90 
   5   2  -2   63.89    2.90 
  -5  -2   2   58.99    3.70 
  -5  -2   2   59.99    5.50 
  -5  -2   2   60.29    3.20 
  -5  -2   2   72.39    4.00 
  -5  -2   2   69.09    3.60 
   4   2  -2   80.69    3.30 
   4   2  -2   78.69    4.30 
   4   2  -2   78.89    3.70 
   4   2  -2   78.69    3.20 
   4   2  -2   78.69    3.90 
   4   2  -2   78.19    3.80 
  -4  -2   2   81.79    4.10 
  -4  -2   2   80.39    5.70 
  -4  -2   2   79.09    3.80 
   3   2  -2 1165.98   40.30 
   3   2  -2 1210.18   40.40 
   3   2  -2 1181.78   40.70 
   3   2  -2 1215.38   39.80 
   3   2  -2 1124.79   40.20 
  -3  -2   2 1201.08   40.60 
  -3  -2   2 1217.58   42.50 
  -3  -2   2 1138.69   40.20 
   2   2  -2 1873.81   65.59 
   2   2  -2 1971.70   64.99 
   2   2  -2 2010.40   65.49 
   2   2  -2 2023.50   65.49 
  -2  -2   2 1911.31   65.49 
  -2  -2   2 1963.60   65.69 
  -2  -2   2 1900.81   65.29 
  -2  -2   2 2078.89   67.29 
  -2  -2   2 1771.12   65.09 
   1   2  -2 1330.67   47.30 
   1   2  -2 1460.45   46.70 
   1   2  -2 1392.16   46.80 
   1   2  -2 1253.27   46.40 
  -1  -2   2 1422.46   46.50 
  -1  -2   2 1442.16   48.30 
  -1  -2   2 1452.75   47.00 
  -1  -2   2 1351.56   46.70 
   0   2  -2 8803.82  316.27 
   0   2  -2 8818.42  300.77 
   0   2  -2 9037.40  298.27 
   0  -2   2 8872.61  300.47 
   0  -2   2 8249.38  315.47 
   0  -2   2 9308.17  299.47 
   0  -2   2 8892.01  297.27 
  -1   2  -2 1807.72   63.49 
  -1   2  -2 1813.82   63.39 
  -1   2  -2 1936.91   63.39 
  -1   2  -2 1904.71   63.09 
   1  -2   2 1786.92   63.69 
   1  -2   2 1896.11   62.89 
   1  -2   2 1861.11   63.29 
   1  -2   2 2006.00   63.59 
  -2   2  -2 1337.97   44.90 
  -2   2  -2 1247.58   44.90 
  -2   2  -2 1333.47   45.00 
  -2   2  -2 1184.38   48.10 
  -2   2  -2 1314.47   44.40 
  -2   2  -2 1367.36   44.90 
   2  -2   2 1383.06   44.80 
   2  -2   2 1385.16   45.10 
   2  -2   2 1367.16   45.40 
   2  -2   2 1260.27   44.70 
   2  -2   2 1274.27   44.00 
  -3   2  -2 1143.79   37.90 
  -3   2  -2 1119.39   38.00 
  -3   2  -2 1061.39   36.90 
  -3   2  -2 1093.09   37.50 
  -3   2  -2 1139.49   37.90 
  -3   2  -2 1070.39   37.80 
   3  -2   2 1068.89   37.80 
   3  -2   2 1070.89   37.90 
   3  -2   2 1083.19   38.30 
   3  -2   2 1071.09   36.80 
  -4   2  -2  177.68    7.60 
  -4   2  -2  175.98    7.60 
  -4   2  -2  170.58    6.70 
  -4   2  -2  181.88    7.80 
  -4   2  -2  175.38    7.40 
  -4   2  -2  176.58    7.20 
   4  -2   2  168.48    7.70 
   4  -2   2  161.78    7.80 
   4  -2   2  174.48    6.80 
  -5   2  -2   15.10    2.30 
  -5   2  -2   15.90    2.20 
  -5   2  -2   21.00    2.10 
  -5   2  -2   20.60    2.10 
  -5   2  -2   16.70    2.30 
  -5   2  -2   18.80    2.30 
  -5   2  -2   18.10    1.60 
  -5   2  -2   19.40    2.40 
  -5   2  -2   19.00    2.50 
   5  -2   2   19.20    2.30 
   5  -2   2   14.20    1.60 
   5  -2   2   16.70    1.60 
   5  -2   2   17.60    2.30 
  -6   2  -2  292.77   10.60 
  -6   2  -2  268.27   12.00 
  -6   2  -2  285.97   11.50 
  -6   2  -2  280.07   11.10 
  -6   2  -2  256.97   11.10 
  -6   2  -2  277.77   11.30 
   6  -2   2  274.17   11.50 
   6  -2   2  275.87   10.50 
   6  -2   2  282.47   11.50 
   6  -2   2  294.27   10.80 
  -7   2  -2   35.30    5.00 
  -7   2  -2   41.10    2.50 
  -7   2  -2   41.80    3.20 
  -7   2  -2   45.00    3.30 
  -7   2  -2   40.80    3.10 
   7  -2   2   39.50    2.70 
   7  -2   2   42.80    3.40 
   7  -2   2   37.70    3.10 
   7  -2   2   43.20    2.80 
  -8   2  -2   26.50    2.20 
  -8   2  -2   27.50    2.20 
  -8   2  -2   28.20    2.50 
   8  -2   2   27.40    2.00 
   8  -2   2   25.20    2.60 
   9   1  -2   84.69    3.80 
   9   1  -2   84.79    3.80 
  -9  -1   2   84.99    4.00 
  -9  -1   2   79.29    3.70 
  -9  -1   2   82.49    3.80 
  -9  -1   2   77.29    4.00 
   8   1  -2  380.96   13.40 
   8   1  -2  307.07   15.00 
   8   1  -2  379.36   13.50 
   8   1  -2  335.87   13.90 
  -8  -1   2  373.36   13.60 
  -8  -1   2  374.86   13.80 
  -8  -1   2  360.06   13.80 
  -8  -1   2  358.76   13.40 
   7   1  -2  315.47   14.70 
   7   1  -2  337.97   13.60 
   7   1  -2  325.57   12.30 
   7   1  -2  330.47   11.80 
   7   1  -2  346.17   12.70 
   7   1  -2  352.26   12.50 
  -7  -1   2  319.47   12.90 
  -7  -1   2  329.97   13.00 
  -7  -1   2  334.47   13.00 
  -7  -1   2  339.57   12.60 
  -7  -1   2  305.97   13.40 
   6   1  -2   18.20    1.60 
   6   1  -2   16.10    2.40 
   6   1  -2   16.40    1.80 
   6   1  -2   15.00    1.50 
   6   1  -2   18.40    1.70 
   6   1  -2   17.80    1.60 
   6   1  -2   15.00    1.50 
   6   1  -2   16.10    2.80 
  -6  -1   2   18.50    1.90 
  -6  -1   2   18.10    2.40 
  -6  -1   2   18.80    2.30 
  -6  -1   2   17.40    2.10 
  -6  -1   2   16.20    2.30 
  -6  -1   2   14.90    1.70 
  -6  -1   2   17.40    2.20 
   5   1  -2  777.12   27.20 
   5   1  -2  921.61   28.10 
   5   1  -2  787.32   27.40 
   5   1  -2  739.23   28.30 
   5   1  -2  802.72   29.40 
   5   1  -2  813.62   27.40 
   5   1  -2  818.82   28.40 
  -5  -1   2  732.33   27.90 
  -5  -1   2  863.11   34.50 
  -5  -1   2  810.42   28.10 
  -5  -1   2  809.72   28.60 
  -5  -1   2  779.12   27.80 
  -5  -1   2  735.63   30.50 
  -5  -1   2  789.52   28.70 
   4   1  -2  212.98    8.10 
   4   1  -2  230.28    9.60 
   4   1  -2  227.68    8.20 
   4   1  -2  226.48    8.80 
   4   1  -2  221.48    8.90 
  -4  -1   2  229.98    9.10 
  -4  -1   2  232.18    9.00 
  -4  -1   2  230.68    8.70 
  -4  -1   2  230.38   11.30 
  -4  -1   2  224.88    9.10 
   3   1  -2 1403.96   47.50 
   3   1  -2 1407.96   46.40 
   3   1  -2 1401.56   47.00 
   3   1  -2 1360.66   46.90 
  -3  -1   2 1366.76   49.00 
  -3  -1   2 1310.27   46.70 
  -3  -1   2 1406.56   47.10 
  -3  -1   2 1379.86   47.00 
   2   1  -2 3150.48  117.79 
   2   1  -2 3593.84  117.19 
   2   1  -2 3628.14  142.89 
  -2  -1   2 3429.16  117.59 
  -2  -1   2 3677.13  125.59 
   1   1  -2 8093.69  292.87 
   1   1  -2 8758.32  292.67 
   1   1  -2 8251.37  290.67 
  -1  -1   2 8856.31  340.77 
  -1  -1   2 9569.04  301.67 
   0   1  -2   96.39    3.60 
   0   1  -2   94.59    4.00 
   0   1  -2   93.49    3.70 
   0   1  -2  102.79    3.60 
   0  -1   2   93.79    3.70 
   0  -1   2  102.59    4.00 
  -1   1  -2 1223.68   40.90 
  -1   1  -2 1258.17   41.20 
  -1   1  -2 1157.08   41.10 
   1  -1   2 1206.88   41.10 
   1  -1   2 1192.88   40.70 
   1  -1   2 1258.07   41.30 
  -2   1  -2 2001.30   72.59 
  -2   1  -2 2033.60   72.79 
  -2   1  -2 2137.89   72.79 
  -2   1  -2 2050.29   72.29 
  -2   1  -2 2237.08   72.89 
   2  -1   2 2178.78   72.69 
   2  -1   2 2252.57   72.19 
   2  -1   2 2174.78   72.79 
   2  -1   2 2254.37   72.89 
   2  -1   2 2245.68   73.49 
   2  -1   2 2244.28   72.59 
   2  -1   2 2109.99   82.09 
  -3   1  -2   27.80    2.00 
  -3   1  -2   29.40    2.10 
  -3   1  -2   27.90    1.80 
  -3   1  -2   29.00    2.10 
  -3   1  -2   24.80    1.80 
   3  -1   2   29.70    1.40 
   3  -1   2   28.30    2.20 
   3  -1   2   27.30    2.10 
   3  -1   2   26.20    1.40 
   3  -1   2   34.90    2.10 
   3  -1   2   28.80    1.80 
  -4   1  -2   75.39    3.70 
  -4   1  -2   75.09    4.00 
  -4   1  -2   80.19    4.10 
  -4   1  -2   73.49    4.00 
   4  -1   2   76.29    4.30 
   4  -1   2   78.29    3.20 
   4  -1   2   74.49    3.70 
  -5   1  -2   66.09    4.00 
  -5   1  -2   63.39    3.70 
  -5   1  -2   66.09    3.70 
  -5   1  -2   65.29    3.60 
  -5   1  -2   68.69    4.00 
  -5   1  -2   61.59    3.90 
  -5   1  -2   59.69    3.10 
  -5   1  -2   56.79    3.50 
   5  -1   2   65.39    4.30 
   5  -1   2   64.69    2.90 
   5  -1   2   62.99    3.70 
   5  -1   2   56.69    3.00 
   5  -1   2   63.89    3.10 
   5  -1   2   69.19    3.70 
   5  -1   2   58.89    3.50 
   5  -1   2   58.89    3.10 
  -6   1  -2  445.76   17.60 
  -6   1  -2  465.95   16.30 
  -6   1  -2  465.45   17.10 
  -6   1  -2  457.15   16.90 
  -6   1  -2  458.45   17.00 
  -6   1  -2  441.86   17.50 
  -6   1  -2  451.95   17.00 
   6  -1   2  465.85   17.00 
   6  -1   2  464.35   16.40 
   6  -1   2  455.85   16.20 
   6  -1   2  421.76   17.90 
   6  -1   2  435.76   16.90 
   6  -1   2  454.75   16.30 
   6  -1   2  422.76   16.90 
  -7   1  -2  229.08    9.90 
  -7   1  -2  246.68   10.00 
  -7   1  -2  245.38   10.00 
  -7   1  -2  220.38   10.50 
  -7   1  -2  246.78   10.10 
  -7   1  -2  237.68    9.20 
   7  -1   2  218.38    9.90 
   7  -1   2  254.37    9.50 
   7  -1   2  243.18    9.30 
   7  -1   2  232.98    9.20 
   7  -1   2  252.47   10.20 
  -8   1  -2  263.27   10.00 
  -8   1  -2  235.58    9.80 
  -8   1  -2  233.48    9.10 
  -8   1  -2  246.88   10.00 
   8  -1   2  246.58   10.20 
   8  -1   2  245.08    9.50 
  -9   1  -2    1.50    0.90 
  -9   1  -2    2.80    1.00 
   9  -1   2    1.40    0.70 
   9  -1   2    0.90    1.10 
   9   0  -2  249.08    9.20 
   9   0  -2  251.57    9.20 
  -9   0   2  254.07    9.30 
  -9   0   2  254.17    9.80 
   8   0  -2   45.10    2.80 
   8   0  -2   44.70    3.40 
   8   0  -2   48.60    3.00 
  -8   0   2   49.70    3.30 
  -8   0   2   45.50    2.90 
  -8   0   2   50.59    3.40 
  -8   0   2   48.50    2.80 
   7   0  -2  261.27   11.50 
   7   0  -2  293.47   10.90 
   7   0  -2  273.57   10.60 
   7   0  -2  279.17   11.80 
  -7   0   2  269.67   10.70 
  -7   0   2  273.97   11.20 
  -7   0   2  284.87   11.20 
   6   0  -2    3.20    1.80 
   6   0  -2    6.40    1.80 
   6   0  -2    2.20    1.10 
   6   0  -2    4.20    1.10 
   6   0  -2    3.50    0.90 
  -6   0   2    4.20    1.30 
  -6   0   2    3.80    1.40 
  -6   0   2    4.20    1.20 
  -6   0   2    5.20    1.90 
  -6   0   2    4.00    1.20 
  -6   0   2    4.10    1.40 
   5   0  -2  125.99    5.00 
   5   0  -2  134.49    7.00 
   5   0  -2  123.89    6.00 
   5   0  -2  124.89    5.20 
   5   0  -2  127.59    5.20 
   5   0  -2  124.09    4.90 
   5   0  -2  122.89    5.40 
  -5   0   2  124.29    6.10 
  -5   0   2  130.69    5.70 
  -5   0   2  133.29    6.50 
  -5   0   2  130.09    6.10 
  -5   0   2  122.99    5.70 
  -5   0   2  123.39    6.10 
  -5   0   2  120.99    5.40 
  -5   0   2  131.49    5.70 
   4   0  -2  150.78    7.20 
   4   0  -2  154.88    6.50 
   4   0  -2  158.58    5.80 
   4   0  -2  146.49    5.70 
   4   0  -2  150.78    6.50 
  -4   0   2  146.89    6.20 
  -4   0   2  152.18    6.60 
  -4   0   2  155.38    8.90 
  -4   0   2  157.08    6.60 
  -4   0   2  161.28    6.90 
   3   0  -2  255.57    8.90 
   3   0  -2  252.37   10.00 
   3   0  -2  249.18    9.40 
   3   0  -2  238.88    9.40 
  -3   0   2  247.78    9.20 
  -3   0   2  269.77    9.60 
  -3   0   2  247.38   11.40 
  -3   0   2  251.87    9.50 
  -3   0   2  249.28    9.70 
   2   0  -2 1612.74   56.69 
   2   0  -2 1678.43   56.59 
   2   0  -2 1817.72   57.09 
   2   0  -2 1667.43   57.19 
   2   0  -2 1612.44   57.39 
  -2   0   2 1610.74   57.19 
  -2   0   2 1757.02   58.69 
  -2   0   2 1663.83   56.99 
  -2   0   2 1781.12   57.09 
   1   0  -2 1587.44   53.89 
   1   0  -2 1586.44   54.69 
   1   0  -2 1557.34   54.39 
   1   0  -2 1610.64   54.09 
   1   0  -2 1683.13   54.19 
  -1   0   2 1559.94   54.19 
  -1   0   2 1710.23   55.29 
   0   0  -2 8686.33  299.37 
   0   0  -2 8349.86  298.77 
   0   0  -2 8996.00  303.07 
   0   0   2 9405.36  420.06 
   0   0   2 9259.67  336.87 
   0   0   2 8863.41  299.37 
  -1   0  -2  976.50   33.60 
  -1   0  -2  989.70   33.60 
  -1   0  -2  974.60   33.60 
   1   0   2 1000.60   38.10 
   1   0   2  986.00   33.30 
   1   0   2 1042.10   33.70 
  -2   0  -2 5887.41  211.78 
  -2   0  -2 6336.57  213.88 
  -2   0  -2 6002.50  213.08 
   2   0   2 6282.07  212.18 
   2   0   2 6882.61  213.48 
   2   0   2 6479.55  211.38 
   2   0   2 6276.17  214.38 
  -3   0  -2  279.17   10.30 
  -3   0  -2  283.47   10.30 
  -3   0  -2  269.37   10.00 
  -3   0  -2  256.27   10.10 
   3   0   2  280.67   10.50 
   3   0   2  287.47    9.60 
   3   0   2  273.37   10.00 
   3   0   2  284.77   10.10 
   3   0   2  284.67    9.80 
  -4   0  -2  114.59    5.20 
  -4   0  -2  119.69    5.30 
  -4   0  -2  108.89    5.00 
  -4   0  -2  112.79    4.90 
   4   0   2  113.99    4.80 
   4   0   2  112.29    4.90 
   4   0   2  112.19    4.60 
   4   0   2  121.29    4.40 
   4   0   2  121.39    5.60 
  -5   0  -2  146.69    6.70 
  -5   0  -2  146.29    6.60 
  -5   0  -2  150.38    6.40 
  -5   0  -2  153.88    6.80 
   5   0   2  146.89    7.10 
   5   0   2  146.39    6.40 
   5   0   2  149.99    5.70 
  -6   0  -2  409.86   16.00 
  -6   0  -2  437.96   16.70 
  -6   0  -2  449.56   16.20 
  -6   0  -2  438.36   15.50 
  -6   0  -2  410.66   16.00 
  -6   0  -2  443.66   16.20 
  -6   0  -2  448.36   16.60 
  -6   0  -2  412.56   16.60 
   6   0   2  425.86   15.40 
   6   0   2  426.06   15.50 
   6   0   2  421.76   15.50 
   6   0   2  447.86   16.30 
   6   0   2  440.06   17.30 
   6   0   2  398.46   15.20 
   6   0   2  417.96   16.00 
  -7   0  -2  139.59    7.40 
  -7   0  -2  153.08    6.90 
  -7   0  -2  151.58    6.90 
  -7   0  -2  145.49    6.90 
  -7   0  -2  126.09    8.00 
  -7   0  -2  152.68    6.20 
  -7   0  -2  155.08    7.00 
   7   0   2  148.59    6.20 
   7   0   2  132.19    7.80 
   7   0   2  148.09    7.00 
   7   0   2  148.39    6.20 
   7   0   2  150.08    6.40 
   7   0   2  146.79    6.90 
  -8   0  -2  389.56   14.90 
  -8   0  -2  384.26   13.90 
  -8   0  -2  394.16   14.80 
  -8   0  -2  366.36   14.50 
   8   0   2  351.96   14.90 
   8   0   2  378.46   14.10 
   8   0   2  383.86   14.90 
   8   0   2  410.06   14.30 
   8   0   2  385.26   14.00 
  -9   0  -2   25.20    2.40 
  -9   0  -2   26.10    2.50 
   9   0   2   24.50    2.60 
   9   0   2   25.40    2.10 
   8  -1  -2  194.18    8.40 
   8  -1  -2  209.78    7.80 
   8  -1  -2  205.38    7.80 
  -8   1   2  183.38    7.80 
  -8   1   2  205.28    8.20 
  -8   1   2  200.08    8.00 
   7  -1  -2   32.10    3.10 
   7  -1  -2   30.40    3.20 
   7  -1  -2   35.00    2.50 
   7  -1  -2   39.80    2.80 
  -7   1   2   35.20    3.00 
  -7   1   2   34.20    2.40 
  -7   1   2   37.10    3.00 
  -7   1   2   30.70    2.50 
   6  -1  -2   48.30    2.70 
   6  -1  -2   57.79    3.40 
   6  -1  -2   56.39    3.10 
   6  -1  -2   53.19    4.70 
   6  -1  -2   54.69    4.20 
   6  -1  -2   60.19    4.10 
  -6   1   2   53.09    3.40 
  -6   1   2   56.99    3.60 
  -6   1   2   53.79    3.60 
  -6   1   2   53.99    3.10 
  -6   1   2   57.79    4.40 
   5  -1  -2  193.18    7.50 
   5  -1  -2  195.38    7.70 
   5  -1  -2  204.58    9.70 
   5  -1  -2  199.28    7.40 
   5  -1  -2  191.78    7.90 
   5  -1  -2  221.18    8.90 
   5  -1  -2  197.78    7.80 
  -5   1   2  209.28    9.30 
  -5   1   2  214.28    8.70 
  -5   1   2  194.18    8.30 
  -5   1   2  183.58    8.10 
  -5   1   2  198.18    7.90 
  -5   1   2  210.98    8.50 
   4  -1  -2  687.43   23.70 
   4  -1  -2  721.93   25.60 
   4  -1  -2  674.93   23.60 
   4  -1  -2  710.23   24.60 
   4  -1  -2  650.33   24.30 
  -4   1   2  694.03   24.50 
  -4   1   2  676.13   27.90 
  -4   1   2  675.33   24.40 
  -4   1   2  688.23   24.10 
  -4   1   2  690.93   24.90 
   3  -1  -2   92.99    4.80 
   3  -1  -2   90.89    3.60 
   3  -1  -2   89.99    4.20 
   3  -1  -2   89.79    4.10 
   3  -1  -2   92.39    3.70 
  -3   1   2   95.69    4.20 
  -3   1   2   95.89    4.30 
  -3   1   2   90.69    4.50 
  -3   1   2   89.09    3.90 
  -3   1   2   93.29    6.10 
   2  -1  -2  603.94   22.00 
   2  -1  -2  615.84   21.80 
   2  -1  -2  677.53   22.40 
   2  -1  -2  656.03   22.90 
   2  -1  -2  664.83   22.00 
  -2   1   2  672.73   24.30 
  -2   1   2  636.24   22.60 
  -2   1   2  659.73   26.00 
  -2   1   2  624.84   22.30 
  -2   1   2  671.13   22.40 
   1  -1  -2 3681.73  125.79 
   1  -1  -2 3707.63  125.19 
   1  -1  -2 3899.71  126.89 
   1  -1  -2 3474.75  125.39 
  -1   1   2 3903.91  132.89 
  -1   1   2 3667.03  127.49 
  -1   1   2 3853.51  126.99 
  -1   1   2 3741.43  126.59 
   0  -1  -2   28.00    1.20 
   0   1   2   29.60    1.50 
   0   1   2   35.20    1.70 
   0   1   2   27.20    1.70 
  -1  -1  -2 1255.47   42.60 
  -1  -1  -2 1321.57   44.30 
   1   1   2 1245.18   42.40 
   1   1   2 1240.48   42.60 
   1   1   2 1231.88   42.50 
  -2  -1  -2 2009.80   65.29 
  -2  -1  -2 1888.91   64.69 
   2   1   2 1947.11   64.39 
   2   1   2 1858.61   64.49 
   2   1   2 1846.32   64.89 
   2   1   2 2013.70   65.09 
  -3  -1  -2 6076.09  208.18 
  -3  -1  -2 6350.56  209.88 
  -3  -1  -2 6643.74  210.38 
   3   1   2 5750.72  207.08 
   3   1   2 5773.42  206.68 
   3   1   2 6231.28  209.28 
   3   1   2 6263.87  207.08 
   3   1   2 6420.86  209.78 
  -4  -1  -2  501.95   17.70 
  -4  -1  -2  451.15   17.40 
  -4  -1  -2  505.95   17.70 
  -4  -1  -2  479.25   17.40 
   4   1   2  521.35   18.20 
   4   1   2  502.95   16.90 
   4   1   2  489.45   17.50 
   4   1   2  488.55   17.30 
  -5  -1  -2  305.07   11.40 
  -5  -1  -2  277.87   11.50 
  -5  -1  -2  306.17   11.90 
  -5  -1  -2  315.97   11.90 
   5   1   2  319.37   12.40 
   5   1   2  313.77   11.60 
   5   1   2  306.67   10.80 
   5   1   2  286.17   11.20 
  -6  -1  -2  231.78   10.10 
  -6  -1  -2  248.28   10.20 
  -6  -1  -2  231.58    9.10 
  -6  -1  -2  242.58    9.60 
  -6  -1  -2  221.68    9.40 
  -6  -1  -2  233.68    9.60 
  -6  -1  -2  238.48    9.00 
  -6  -1  -2  254.27    9.70 
  -6  -1  -2  241.08    9.90 
   6   1   2  254.17   10.90 
   6   1   2  237.58    9.10 
   6   1   2  230.78    9.40 
   6   1   2  226.58    8.90 
   6   1   2  251.97    9.90 
   6   1   2  231.18    8.80 
   6   1   2  232.38    9.00 
  -7  -1  -2   36.60    3.30 
  -7  -1  -2   35.50    2.50 
  -7  -1  -2   33.40    2.40 
  -7  -1  -2   36.10    2.80 
  -7  -1  -2   37.70    3.00 
  -7  -1  -2   33.40    2.90 
  -7  -1  -2   32.20    3.00 
   7   1   2   37.20    2.40 
   7   1   2   37.50    3.00 
   7   1   2   34.70    2.40 
   7   1   2   35.50    3.20 
   7   1   2   37.10    3.80 
   7   1   2   38.90    2.60 
  -8  -1  -2    9.90    1.90 
  -8  -1  -2    9.20    1.50 
  -8  -1  -2   11.10    1.50 
  -8  -1  -2   11.70    2.10 
  -8  -1  -2    8.80    1.80 
   8   1   2   11.00    2.00 
   8   1   2   13.60    2.40 
   8   1   2   11.90    1.60 
   8   1   2   12.30    1.70 
   8   1   2   10.70    1.50 
  -9  -1  -2   83.49    4.50 
  -9  -1  -2   82.59    4.50 
   9   1   2   78.79    3.90 
   9   1   2   73.19    4.40 
   9   1   2   74.79    3.70 
   9   1   2   75.79    3.80 
 -10  -1  -2   24.30    2.60 
   8  -2  -2  210.18    8.40 
   8  -2  -2  209.08    8.30 
  -8   2   2  246.78    8.60 
  -8   2   2  232.28    8.60 
  -8   2   2  224.28    8.60 
   7  -2  -2   46.20    2.90 
   7  -2  -2   47.70    2.90 
   7  -2  -2   44.60    3.50 
  -7   2   2   58.79    3.50 
  -7   2   2   39.00    2.90 
  -7   2   2   45.60    3.30 
   6  -2  -2  293.27   10.70 
   6  -2  -2  274.87   10.70 
   6  -2  -2  277.87   11.70 
   6  -2  -2  268.97   11.50 
  -6   2   2  279.57   11.20 
  -6   2   2  275.27   11.10 
  -6   2   2  282.97   12.30 
  -6   2   2  248.98   11.90 
  -6   2   2  286.47   11.20 
   5  -2  -2   74.09    4.80 
   5  -2  -2   73.19    4.40 
   5  -2  -2   72.19    5.20 
   5  -2  -2   77.89    3.70 
   5  -2  -2   73.19    3.80 
  -5   2   2   69.29    4.00 
  -5   2   2   71.39    3.70 
  -5   2   2   68.19    4.10 
  -5   2   2   67.29    4.10 
  -5   2   2   67.99    3.60 
  -5   2   2   74.79    4.90 
   4  -2  -2   86.29    4.00 
   4  -2  -2   87.19    4.80 
   4  -2  -2   88.19    4.00 
   4  -2  -2   95.39    3.90 
   4  -2  -2   87.59    3.60 
   4  -2  -2   94.39    4.70 
   4  -2  -2   92.99    5.50 
  -4   2   2   85.39    4.30 
  -4   2   2   81.19    3.90 
  -4   2   2   88.79    4.40 
  -4   2   2   83.49    4.40 
  -4   2   2   89.99    4.40 
  -4   2   2   89.59    5.00 
   3  -2  -2  231.28    8.60 
   3  -2  -2  249.58    8.70 
   3  -2  -2  223.98    9.10 
   3  -2  -2  248.08    9.40 
   3  -2  -2  246.38   10.10 
  -3   2   2  238.88   13.80 
  -3   2   2  241.28    9.30 
  -3   2   2  239.28    9.70 
   2  -2  -2  826.92   26.80 
   2  -2  -2  704.43   27.20 
   2  -2  -2  774.52   26.70 
   2  -2  -2  736.93   26.90 
   2  -2  -2  822.62   27.20 
   2  -2  -2  839.32   28.00 
   2  -2  -2  783.12   27.20 
  -2   2   2  795.02   31.70 
  -2   2   2  798.52   27.10 
  -2   2   2  779.02   27.60 
  -2   2   2  822.22   28.00 
  -2   2   2  783.22   27.10 
   1  -2  -2  119.79    4.80 
   1  -2  -2  132.59    4.50 
   1  -2  -2  134.69    4.60 
  -1   2   2  124.49    5.10 
  -1   2   2  123.49    4.60 
  -1   2   2  113.59    4.60 
  -1   2   2  126.19    5.40 
  -1   2   2  128.89    7.70 
   0  -2  -2 1844.72   60.79 
   0  -2  -2 1795.02   61.09 
   0   2   2 1916.41   61.69 
   0   2   2 1779.82   61.49 
   0   2   2 1836.42   61.09 
   0   2   2 1723.33   60.79 
  -1  -2  -2 2105.69   71.79 
  -1  -2  -2 2232.98   71.49 
   1   2   2 1952.20   71.49 
   1   2   2 2104.29   71.89 
   1   2   2 2274.47   83.49 
  -2  -2  -2  980.90   31.80 
  -2  -2  -2  929.41   32.00 
  -2  -2  -2  893.61   31.90 
  -2  -2  -2  951.30   31.90 
   2   2   2  947.31   32.30 
   2   2   2  929.51   32.10 
   2   2   2  966.40   31.70 
   2   2   2  917.11   31.70 
   2   2   2  979.10   32.00 
  -3  -2  -2  905.31   29.60 
  -3  -2  -2  884.21   29.60 
  -3  -2  -2  885.61   29.10 
   3   2   2  892.81   29.10 
   3   2   2  821.62   29.40 
   3   2   2  793.92   29.20 
   3   2   2  842.12   29.00 
   3   2   2  895.01   29.50 
   3   2   2  837.82   29.80 
  -4  -2  -2  916.11   32.00 
  -4  -2  -2  973.20   32.40 
  -4  -2  -2  914.71   31.50 
  -4  -2  -2  944.51   32.40 
   4   2   2  877.51   31.50 
   4   2   2  927.31   32.20 
   4   2   2  953.80   31.60 
   4   2   2  961.50   32.10 
   4   2   2  944.31   32.80 
  -5  -2  -2   53.89    3.20 
  -5  -2  -2   52.09    3.20 
  -5  -2  -2   45.70    3.30 
  -5  -2  -2   47.70    4.20 
  -5  -2  -2   52.39    2.90 
   5   2   2   50.59    2.90 
   5   2   2   51.79    3.00 
   5   2   2   52.89    2.40 
   5   2   2   52.79    3.50 
  -6  -2  -2  139.39    6.70 
  -6  -2  -2  139.59    5.70 
  -6  -2  -2  131.99    5.80 
  -6  -2  -2  129.49    8.50 
  -6  -2  -2  136.09    6.20 
  -6  -2  -2  146.59    6.70 
  -6  -2  -2  143.49    6.20 
   6   2   2  150.38    7.30 
   6   2   2  128.79    6.10 
   6   2   2  139.29    5.50 
   6   2   2  135.59    5.50 
   6   2   2  136.09    5.60 
   6   2   2  129.19    5.60 
   6   2   2  148.69    6.40 
   6   2   2  142.29    6.50 
  -7  -2  -2  218.58    8.50 
  -7  -2  -2  216.98    9.80 
  -7  -2  -2  217.58    9.20 
  -7  -2  -2  224.28    9.30 
  -7  -2  -2  214.18    8.70 
  -7  -2  -2  225.48    9.30 
   7   2   2  212.68    8.40 
   7   2   2  217.28   10.50 
   7   2   2  210.58    8.50 
   7   2   2  211.58    9.00 
   7   2   2  220.58    8.70 
   7   2   2  235.98    9.60 
  -8  -2  -2  137.79    6.80 
  -8  -2  -2  142.79    6.30 
  -8  -2  -2  145.29    6.80 
  -8  -2  -2  126.79    7.20 
  -8  -2  -2  140.39    6.80 
  -8  -2  -2  142.69    6.00 
   8   2   2  139.09    6.20 
   8   2   2  146.59    6.20 
   8   2   2  140.29    7.10 
   8   2   2  143.99    6.80 
   8   2   2  145.69    6.00 
  -9  -2  -2  142.99    6.50 
  -9  -2  -2  148.49    6.60 
  -9  -2  -2  129.59    5.80 
   9   2   2  136.59    5.90 
   9   2   2  128.19    6.40 
   9   2   2  127.79    5.60 
   9   2   2  128.19    5.80 
 -10  -2  -2   20.50    2.20 
 -10  -2  -2   25.30    2.10 
  10   2   2   20.50    1.70 
  10   2   2   21.90    2.20 
  10   2   2   18.70    1.60 
   7  -3  -2   27.00    1.90 
   7  -3  -2   30.10    2.10 
   7  -3  -2   30.30    2.70 
  -7   3   2   30.30    2.40 
  -7   3   2   27.90    2.20 
  -7   3   2   33.40    2.50 
   6  -3  -2  188.98    7.60 
   6  -3  -2  200.28    8.80 
  -6   3   2  188.48    8.10 
  -6   3   2  197.48    8.20 
  -6   3   2  180.78    9.10 
  -6   3   2  187.28    8.10 
  -6   3   2  173.68    9.00 
   5  -3  -2  207.18    9.20 
   5  -3  -2  213.98    8.50 
   5  -3  -2  218.58    9.70 
   5  -3  -2  217.78    8.60 
   5  -3  -2  195.68   10.20 
  -5   3   2  215.88   10.30 
  -5   3   2  216.98    9.10 
  -5   3   2  222.78    9.10 
  -5   3   2  211.28    9.10 
  -5   3   2  226.08   10.30 
   4  -3  -2  200.88    9.70 
   4  -3  -2  208.08    8.20 
   4  -3  -2  217.98    9.20 
   4  -3  -2  218.58    8.90 
   4  -3  -2  201.78    7.60 
   4  -3  -2  196.78    7.80 
   4  -3  -2  202.98    8.10 
  -4   3   2  209.48    9.50 
  -4   3   2  219.08    8.80 
  -4   3   2  203.78    8.60 
  -4   3   2  206.28    8.60 
   3  -3  -2  136.39    5.30 
   3  -3  -2  131.79    5.30 
   3  -3  -2  139.09    6.80 
   3  -3  -2  135.99    6.30 
   3  -3  -2  131.89    5.30 
   3  -3  -2  135.69    6.00 
   3  -3  -2  136.09    5.60 
  -3   3   2  146.19    6.70 
  -3   3   2  132.89    6.00 
  -3   3   2  133.19    5.90 
  -3   3   2  131.29    6.00 
  -3   3   2  155.28   11.50 
  -3   3   2  128.99    5.80 
   2  -3  -2  557.44   19.00 
   2  -3  -2  572.14   19.00 
   2  -3  -2  534.05   19.00 
   2  -3  -2  572.64   20.40 
   2  -3  -2  518.45   19.90 
   2  -3  -2  541.65   19.60 
   2  -3  -2  537.35   19.50 
   2  -3  -2  547.35   19.50 
  -2   3   2  563.14   20.10 
  -2   3   2  582.04   25.30 
  -2   3   2  562.34   20.60 
   1  -3  -2 4403.86  142.89 
   1  -3  -2 4243.78  143.89 
   1  -3  -2 4032.80  142.89 
   1  -3  -2 4384.36  142.29 
   1  -3  -2 4276.47  144.19 
  -1   3   2 4287.57  143.29 
  -1   3   2 4339.97  147.69 
  -1   3   2 4297.37  143.39 
  -1   3   2 3987.10  142.69 
   0  -3  -2   25.60    1.40 
   0  -3  -2   25.20    1.70 
   0  -3  -2   23.10    1.90 
   0   3   2   26.50    1.50 
   0   3   2   26.60    2.00 
   0   3   2   23.80    1.70 
   0   3   2   23.50    1.10 
   0   3   2   25.90    1.60 
   0   3   2   24.00    3.90 
  -1  -3  -2   97.59    4.60 
  -1  -3  -2  100.89    4.30 
  -1  -3  -2  104.29    4.00 
   1   3   2  117.29    4.30 
   1   3   2  115.09    4.80 
   1   3   2  110.09    4.30 
  -2  -3  -2  313.27   10.50 
  -2  -3  -2  274.57   10.50 
  -2  -3  -2  295.67   10.80 
   2   3   2  318.47   10.60 
   2   3   2  302.07   11.00 
  -3  -3  -2 1426.76   48.60 
  -3  -3  -2 1458.35   48.20 
  -3  -3  -2 1417.16   48.50 
  -3  -3  -2 1475.45   48.70 
  -3  -3  -2 1404.16   48.80 
   3   3   2 1456.85   48.30 
   3   3   2 1486.95   48.20 
   3   3   2 1420.36   49.00 
   3   3   2 1372.26   48.50 
   3   3   2 1490.75   48.70 
   3   3   2 1371.96   48.70 
  -4  -3  -2  670.73   24.50 
  -4  -3  -2  664.63   23.40 
  -4  -3  -2  687.33   23.70 
  -4  -3  -2  700.03   23.80 
  -4  -3  -2  655.53   23.30 
  -4  -3  -2  678.43   23.00 
   4   3   2  711.33   24.20 
   4   3   2  695.23   23.00 
   4   3   2  719.73   23.70 
   4   3   2  670.13   23.60 
   4   3   2  648.74   23.10 
   4   3   2  610.94   23.50 
  -5  -3  -2  978.40   37.40 
  -5  -3  -2 1059.89   36.00 
  -5  -3  -2 1026.80   35.60 
  -5  -3  -2 1047.30   36.10 
   5   3   2 1021.10   35.80 
   5   3   2 1042.90   36.60 
   5   3   2 1035.70   35.10 
   5   3   2 1043.60   35.80 
  -6  -3  -2  988.90   35.20 
  -6  -3  -2 1017.30   36.10 
  -6  -3  -2 1001.70   35.00 
  -6  -3  -2 1063.59   35.60 
  -6  -3  -2 1048.30   36.10 
   6   3   2  949.90   35.60 
   6   3   2 1048.30   36.80 
   6   3   2 1023.00   34.80 
   6   3   2  983.80   35.00 
   6   3   2 1075.29   35.80 
   6   3   2  997.50   34.90 
  -7  -3  -2  161.48    6.80 
  -7  -3  -2  155.48    7.70 
  -7  -3  -2  167.18    7.20 
  -7  -3  -2  153.58    7.10 
  -7  -3  -2  156.08    6.50 
  -7  -3  -2  159.38    7.70 
  -7  -3  -2  158.28    7.10 
   7   3   2  149.49    6.90 
   7   3   2  156.78    6.60 
   7   3   2  163.28    8.40 
   7   3   2  156.98    6.30 
   7   3   2  150.48    6.40 
   7   3   2  169.08    7.50 
   7   3   2  154.28    6.40 
   7   3   2  150.48    6.30 
  -8  -3  -2  362.06   15.20 
  -8  -3  -2  385.76   14.70 
  -8  -3  -2  365.06   13.70 
  -8  -3  -2  376.06   14.50 
  -8  -3  -2  383.06   14.70 
  -8  -3  -2  385.26   14.10 
   8   3   2  391.36   14.00 
   8   3   2  369.16   13.70 
   8   3   2  348.87   14.30 
   8   3   2  384.16   15.00 
   8   3   2  351.76   16.00 
   8   3   2  364.96   13.70 
  -9  -3  -2   61.99    4.00 
  -9  -3  -2   71.59    4.20 
  -9  -3  -2   71.59    3.80 
  -9  -3  -2   72.59    4.40 
   9   3   2   61.79    4.10 
   9   3   2   66.69    3.50 
   9   3   2   66.39    4.40 
   9   3   2   66.19    3.50 
   9   3   2   63.59    3.70 
 -10  -3  -2   37.50    2.80 
 -10  -3  -2   30.10    2.10 
 -10  -3  -2   35.40    2.60 
  10   3   2   31.70    2.20 
  10   3   2   30.50    2.00 
  10   3   2   30.20    2.70 
  10   3   2   33.70    2.10 
   6  -4  -2  124.09    6.00 
   6  -4  -2  120.49    5.10 
   6  -4  -2  107.29    4.90 
  -6   4   2  125.19    5.60 
  -6   4   2  114.79    5.40 
  -6   4   2  110.69    5.30 
   5  -4  -2  900.21   30.20 
   5  -4  -2  830.82   29.80 
   5  -4  -2  903.31   31.40 
  -5   4   2  810.82   31.80 
  -5   4   2  862.71   30.50 
  -5   4   2  849.52   30.40 
  -5   4   2  856.51   30.60 
   4  -4  -2 1144.89   41.60 
   4  -4  -2 1270.87   43.10 
   4  -4  -2 1187.78   42.10 
  -4   4   2 1213.38   42.40 
  -4   4   2 1194.48   42.20 
  -4   4   2 1209.78   43.50 
  -4   4   2 1250.07   44.00 
  -4   4   2 1241.18   42.60 
   3  -4  -2  207.18    8.90 
   3  -4  -2  197.68    8.30 
   3  -4  -2  193.28    7.40 
  -3   4   2  198.08    8.20 
  -3   4   2  196.68    7.80 
  -3   4   2  203.38   14.70 
  -3   4   2  210.18    9.20 
  -3   4   2  201.78    8.40 
  -3   4   2  208.28    8.50 
   2  -4  -2   86.19    4.20 
   2  -4  -2   82.19    4.60 
   2  -4  -2   87.19    4.80 
   2  -4  -2   85.89    3.60 
   2  -4  -2   88.39    4.80 
   2  -4  -2   86.79    4.30 
  -2   4   2   87.79    4.40 
  -2   4   2   93.09    5.30 
  -2   4   2   90.29    9.00 
  -2   4   2   94.39    4.40 
  -2   4   2   97.09    5.00 
   1  -4  -2  210.18    8.30 
   1  -4  -2  213.28    7.80 
   1  -4  -2  226.68    8.10 
   1  -4  -2  212.08    9.10 
   1  -4  -2  213.28    8.90 
   1  -4  -2  225.28    8.60 
   1  -4  -2  210.18    8.00 
  -1   4   2  222.38    8.60 
  -1   4   2  246.08   14.10 
  -1   4   2  223.88    9.50 
  -1   4   2  221.78    9.00 
   0  -4  -2  915.91   30.40 
   0  -4  -2  893.11   30.90 
   0  -4  -2  921.81   29.80 
   0  -4  -2  851.01   29.50 
   0   4   2  881.91   29.90 
   0   4   2  891.11   30.20 
   0   4   2  843.52   30.40 
   0   4   2  785.62   35.70 
   0   4   2  854.31   30.70 
   0   4   2  914.01   31.20 
  -1  -4  -2  226.78    9.40 
  -1  -4  -2  250.87    9.00 
  -1  -4  -2  240.48    8.50 
   1   4   2  242.98    8.80 
   1   4   2  247.28    9.60 
   1   4   2  244.98    8.90 
   1   4   2  223.18    8.90 
   1   4   2  226.38    9.10 
  -2  -4  -2 1021.80   34.20 
  -2  -4  -2 1002.00   34.60 
  -2  -4  -2  975.00   35.00 
   2   4   2 1003.10   34.60 
   2   4   2 1007.90   35.10 
   2   4   2 1039.00   34.50 
  -3  -4  -2  631.04   23.20 
  -3  -4  -2  650.73   23.40 
  -3  -4  -2  722.03   23.20 
  -3  -4  -2  675.53   24.00 
  -3  -4  -2  710.93   23.60 
   3   4   2  681.23   23.90 
   3   4   2  698.03   23.40 
   3   4   2  687.93   24.00 
   3   4   2  643.44   23.40 
  -4  -4  -2  140.59    5.80 
  -4  -4  -2  132.39    5.90 
  -4  -4  -2  128.19    5.40 
  -4  -4  -2  136.39    5.50 
  -4  -4  -2  137.39    5.10 
  -4  -4  -2  140.89    5.80 
   4   4   2  137.89    5.90 
   4   4   2  135.09    5.60 
   4   4   2  134.99    5.40 
   4   4   2  140.09    6.20 
   4   4   2  139.09    5.80 
  -5  -4  -2  484.05   17.30 
  -5  -4  -2  498.15   17.70 
  -5  -4  -2  474.15   17.70 
   5   4   2  474.95   17.60 
   5   4   2  490.55   18.20 
   5   4   2  470.45   16.70 
   5   4   2  482.15   17.40 
  -6  -4  -2  371.26   13.90 
  -6  -4  -2  384.36   14.90 
  -6  -4  -2  389.86   14.20 
  -6  -4  -2  358.46   14.40 
  -6  -4  -2  407.66   14.90 
  -6  -4  -2  408.26   14.50 
  -6  -4  -2  371.96   14.00 
   6   4   2  371.46   13.90 
   6   4   2  379.76   13.60 
   6   4   2  374.46   13.90 
   6   4   2  404.66   15.60 
   6   4   2  383.16   13.70 
   6   4   2  400.36   14.60 
   6   4   2  363.26   13.60 
  -7  -4  -2  640.04   23.80 
  -7  -4  -2  663.63   25.20 
  -7  -4  -2  720.63   24.60 
  -7  -4  -2  638.74   24.50 
  -7  -4  -2  688.13   24.20 
  -7  -4  -2  705.73   25.20 
  -7  -4  -2  642.44   23.70 
  -7  -4  -2  648.24   24.20 
   7   4   2  706.83   26.10 
   7   4   2  708.13   23.70 
   7   4   2  719.83   24.90 
   7   4   2  655.23   23.80 
   7   4   2  693.13   23.90 
   7   4   2  666.03   24.30 
   7   4   2  645.44   23.60 
  -8  -4  -2  830.52   30.80 
  -8  -4  -2  898.81   31.30 
  -8  -4  -2  855.71   30.30 
  -8  -4  -2  887.61   30.70 
  -8  -4  -2  892.91   31.30 
  -8  -4  -2  833.92   31.80 
   8   4   2  920.21   31.60 
   8   4   2  848.72   32.80 
   8   4   2  923.81   30.60 
   8   4   2  819.32   30.10 
   8   4   2  846.62   30.30 
   8   4   2  840.22   31.00 
   8   4   2  906.91   30.30 
  -9  -4  -2  340.87   13.20 
  -9  -4  -2  309.47   12.70 
  -9  -4  -2  337.57   12.60 
  -9  -4  -2  326.67   13.10 
   9   4   2  318.07   13.30 
   9   4   2  343.87   12.60 
   9   4   2  334.27   12.20 
   9   4   2  317.87   12.10 
   9   4   2  333.97   13.00 
 -10  -4  -2   85.79    4.30 
 -10  -4  -2   92.39    4.30 
 -10  -4  -2   92.19    4.70 
  10   4   2   94.39    4.70 
  10   4   2   85.69    4.00 
  10   4   2   96.59    4.30 
   6  -5  -2  144.59    6.30 
   6  -5  -2  136.69    6.30 
  -6   5   2  150.08    6.00 
  -6   5   2  146.39    6.00 
   5  -5  -2  194.88    8.60 
   5  -5  -2  187.58    7.60 
  -5   5   2  199.68    8.20 
  -5   5   2  173.58    7.70 
  -5   5   2  200.68    8.10 
   4  -5  -2   40.70    2.80 
   4  -5  -2   42.60    3.70 
   4  -5  -2   33.30    2.90 
  -4   5   2   41.00    4.00 
  -4   5   2   41.90    3.00 
  -4   5   2   46.50    3.40 
  -4   5   2   46.80    4.10 
  -4   5   2   41.00    3.20 
   3  -5  -2  373.26   14.40 
   3  -5  -2  357.76   13.20 
   3  -5  -2  346.17   13.40 
   3  -5  -2  326.07   13.10 
  -3   5   2  367.86   13.70 
  -3   5   2  352.56   14.70 
  -3   5   2  332.77   13.00 
  -3   5   2  347.27   21.40 
  -3   5   2  352.86   15.00 
  -3   5   2  361.86   13.80 
   2  -5  -2  125.79    6.10 
   2  -5  -2  119.49    5.20 
   2  -5  -2  110.39    5.20 
   2  -5  -2  116.59    5.50 
   2  -5  -2  117.49    5.70 
   2  -5  -2  116.99    6.40 
   2  -5  -2  111.09    5.80 
   2  -5  -2  110.69    4.90 
  -2   5   2  115.49    5.60 
  -2   5   2  122.69    6.30 
  -2   5   2  109.59    5.00 
  -2   5   2  120.29    6.50 
  -2   5   2  118.49    6.80 
  -2   5   2  111.09    5.40 
  -2   5   2  116.49   11.50 
  -2   5   2  115.09    4.90 
   1  -5  -2  312.17   11.90 
   1  -5  -2  326.87   12.10 
   1  -5  -2  324.27   12.30 
   1  -5  -2  324.77   12.50 
   1  -5  -2  335.27   12.70 
   1  -5  -2  325.37   12.90 
   1  -5  -2  351.16   13.60 
  -1   5   2  329.87   12.60 
  -1   5   2  325.57   12.50 
  -1   5   2  332.47   13.80 
  -1   5   2  319.07   12.40 
  -1   5   2  352.86   19.60 
  -1   5   2  339.17   13.10 
  -1   5   2  339.17   13.40 
  -1   5   2  314.77   12.10 
   0  -5  -2  175.08    7.80 
   0  -5  -2  174.88    7.20 
   0  -5  -2  171.18    6.50 
   0   5   2  172.58    8.00 
   0   5   2  162.28   12.40 
   0   5   2  165.48    7.00 
   0   5   2  167.08    7.50 
   0   5   2  166.78    7.30 
  -1  -5  -2  920.41   31.50 
  -1  -5  -2  904.21   32.80 
  -1  -5  -2  922.31   32.10 
   1   5   2  956.90   32.10 
   1   5   2  914.51   32.40 
   1   5   2  886.81   32.10 
   1   5   2  953.70   33.10 
  -2  -5  -2  211.48    8.90 
  -2  -5  -2  217.18    8.40 
  -2  -5  -2  213.28    7.80 
   2   5   2  213.78    8.20 
   2   5   2  210.48    8.20 
   2   5   2  222.28    9.10 
   2   5   2  193.28    8.10 
  -3  -5  -2  120.99    5.20 
  -3  -5  -2  113.09    5.60 
  -3  -5  -2  118.69    4.70 
   3   5   2  114.89    5.30 
   3   5   2  120.59    5.10 
   3   5   2  121.69    5.80 
  -4  -5  -2   43.30    2.50 
  -4  -5  -2   39.50    2.40 
  -4  -5  -2   37.80    2.20 
  -4  -5  -2   41.40    2.10 
  -4  -5  -2   42.20    2.90 
   4   5   2   45.00    2.40 
   4   5   2   42.40    2.90 
   4   5   2   37.10    2.30 
  -5  -5  -2 1238.38   42.20 
  -5  -5  -2 1261.57   42.70 
   5   5   2 1230.48   43.30 
   5   5   2 1202.88   42.30 
   5   5   2 1228.78   43.10 
   5   5   2 1214.88   42.70 
  -6  -5  -2  101.79    5.20 
  -6  -5  -2   95.99    4.70 
  -6  -5  -2   88.59    4.90 
  -6  -5  -2  103.39    4.90 
  -6  -5  -2   96.69    4.40 
  -6  -5  -2   95.19    4.60 
   6   5   2  101.39    4.20 
   6   5   2   99.09    4.30 
   6   5   2  100.09    4.50 
   6   5   2  105.89    5.00 
   6   5   2   98.79    4.40 
   6   5   2  103.89    5.80 
  -7  -5  -2   51.89    3.80 
  -7  -5  -2   53.69    3.70 
  -7  -5  -2   59.09    3.60 
  -7  -5  -2   50.09    3.20 
  -7  -5  -2   54.39    3.00 
  -7  -5  -2   53.49    3.20 
   7   5   2   53.09    2.90 
   7   5   2   56.59    3.60 
   7   5   2   56.39    2.80 
   7   5   2   45.80    2.80 
   7   5   2   54.09    3.10 
   7   5   2   54.09    4.50 
   7   5   2   54.79    3.10 
   7   5   2   55.09    3.80 
  -8  -5  -2  507.85   18.80 
  -8  -5  -2  487.85   20.00 
  -8  -5  -2  552.74   19.70 
  -8  -5  -2  524.45   19.50 
  -8  -5  -2  542.45   19.10 
  -8  -5  -2  495.85   18.60 
   8   5   2  516.75   18.80 
   8   5   2  497.65   19.60 
   8   5   2  514.85   19.30 
   8   5   2  543.35   18.60 
   8   5   2  495.75   20.70 
   8   5   2  544.45   18.90 
  -9  -5  -2   53.19    3.70 
  -9  -5  -2   49.80    3.30 
  -9  -5  -2   50.59    3.50 
   9   5   2   44.40    3.70 
   9   5   2   48.70    3.60 
   9   5   2   48.50    2.90 
   9   5   2   55.19    3.30 
 -10  -5  -2  191.28    7.50 
 -10  -5  -2  193.28    7.90 
  10   5   2  174.38    7.70 
  10   5   2  186.08    7.40 
  10   5   2  176.48    7.10 
   5  -6  -2   99.09    4.80 
   5  -6  -2   90.19    4.00 
  -5   6   2  103.79    4.50 
  -5   6   2  101.89    4.60 
   4  -6  -2  276.57   11.40 
   4  -6  -2  240.58   12.60 
   4  -6  -2  264.47   10.30 
  -4   6   2  281.67   10.90 
  -4   6   2  287.77   10.80 
   3  -6  -2  509.55   18.50 
   3  -6  -2  481.95   18.40 
   3  -6  -2  512.85   18.80 
   3  -6  -2  508.25   19.30 
   3  -6  -2  527.25   19.60 
  -3   6   2  552.04   19.20 
  -3   6   2  533.35   20.60 
  -3   6   2  470.05   26.80 
  -3   6   2  490.55   18.30 
  -3   6   2  505.35   20.00 
  -3   6   2  515.15   18.90 
   2  -6  -2  544.15   19.90 
   2  -6  -2  532.45   19.60 
   2  -6  -2  514.15   19.80 
   2  -6  -2  523.55   20.30 
   2  -6  -2  535.85   21.20 
   2  -6  -2  547.05   19.50 
   2  -6  -2  556.94   20.60 
  -2   6   2  554.54   29.40 
  -2   6   2  510.15   21.60 
  -2   6   2  510.05   19.10 
  -2   6   2  545.35   20.90 
  -2   6   2  562.64   20.10 
  -2   6   2  549.15   20.00 
  -2   6   2  542.95   19.40 
  -2   6   2  571.04   21.50 
   1  -6  -2  103.79    5.60 
   1  -6  -2  102.39    5.30 
   1  -6  -2  105.19    5.50 
   1  -6  -2  101.49    4.80 
   1  -6  -2   99.49    5.40 
   1  -6  -2  101.09    4.90 
   1  -6  -2  107.59    6.30 
   1  -6  -2  109.79    4.90 
   1  -6  -2  107.79    5.30 
  -1   6   2  109.69    6.20 
  -1   6   2  105.09    6.50 
  -1   6   2  104.39   11.30 
  -1   6   2  101.29    5.70 
  -1   6   2  105.29    4.60 
  -1   6   2   98.89    5.10 
  -1   6   2  101.89    5.10 
  -1   6   2  102.69    4.80 
   0  -6  -2  726.73   25.50 
   0  -6  -2  708.73   26.00 
   0  -6  -2  759.12   27.10 
   0  -6  -2  741.43   25.70 
   0  -6  -2  730.53   25.20 
   0  -6  -2  724.03   25.90 
   0  -6  -2  704.13   26.00 
   0  -6  -2  761.52   26.10 
   0  -6  -2  747.23   25.40 
   0   6   2  702.73   25.00 
   0   6   2  703.13   25.30 
   0   6   2  718.13   25.60 
   0   6   2  682.63   25.60 
   0   6   2  680.23   25.60 
   0   6   2  723.63   26.30 
   0   6   2  742.23   27.40 
   0   6   2  725.63   26.60 
   0   6   2  713.03   25.90 
  -1  -6  -2  377.36   13.50 
  -1  -6  -2  389.16   14.30 
  -1  -6  -2  391.66   15.20 
  -1  -6  -2  373.46   13.60 
  -1  -6  -2  378.06   13.80 
  -1  -6  -2  368.66   13.90 
  -1  -6  -2  371.26   14.20 
   1   6   2  353.56   14.00 
   1   6   2  399.66   15.50 
   1   6   2  371.66   14.30 
   1   6   2  360.46   13.40 
   1   6   2  368.96   13.60 
   1   6   2  353.36   13.80 
   1   6   2  386.66   14.60 
   1   6   2  368.56   22.00 
   1   6   2  385.76   14.20 
  -2  -6  -2   93.89    4.70 
  -2  -6  -2   92.49    4.00 
  -2  -6  -2   97.29    5.30 
   2   6   2   87.19    4.50 
   2   6   2   94.09    4.50 
   2   6   2   93.49    5.40 
  -3  -6  -2   87.69    4.30 
  -3  -6  -2   82.19    3.70 
  -3  -6  -2   88.79    4.90 
   3   6   2   85.29    5.00 
   3   6   2   85.19    4.20 
   3   6   2   82.89    4.30 
  -4  -6  -2  503.05   17.60 
  -4  -6  -2  505.65   19.00 
  -4  -6  -2  505.15   18.30 
  -4  -6  -2  496.75   18.10 
   4   6   2  484.25   17.80 
   4   6   2  503.15   17.60 
   4   6   2  524.65   19.30 
   4   6   2  491.35   18.30 
   4   6   2  517.45   18.20 
   4   6   2  493.75   18.60 
  -5  -6  -2  262.67   11.00 
  -5  -6  -2  285.37   10.50 
  -5  -6  -2  275.77   10.80 
  -5  -6  -2  244.38   10.80 
  -5  -6  -2  305.67   10.90 
  -5  -6  -2  270.07   10.50 
  -5  -6  -2  287.57   10.80 
   5   6   2  273.17   10.80 
   5   6   2  275.57   10.70 
   5   6   2  280.57   10.80 
   5   6   2  286.07   10.30 
   5   6   2  289.57   10.30 
   5   6   2  281.47   10.50 
   5   6   2  279.27   11.70 
  -6  -6  -2   29.90    2.40 
  -6  -6  -2   28.70    2.70 
  -6  -6  -2   32.00    2.40 
  -6  -6  -2   29.80    2.30 
  -6  -6  -2   28.30    2.10 
  -6  -6  -2   26.80    2.40 
   6   6   2   29.50    2.30 
   6   6   2   29.20    2.10 
   6   6   2   30.70    2.00 
   6   6   2   27.00    2.30 
   6   6   2   28.20    1.90 
   6   6   2   29.10    2.40 
  -7  -6  -2   44.90    3.50 
  -7  -6  -2   41.60    3.50 
  -7  -6  -2   45.70    3.20 
  -7  -6  -2   44.50    3.10 
  -7  -6  -2   44.20    3.00 
  -7  -6  -2   45.20    2.70 
   7   6   2   47.00    3.30 
   7   6   2   46.40    2.60 
   7   6   2   42.70    2.60 
   7   6   2   44.60    3.10 
   7   6   2   41.40    2.70 
   7   6   2   43.80    2.90 
  -8  -6  -2   95.09    5.20 
  -8  -6  -2  102.99    5.60 
  -8  -6  -2   95.99    4.60 
  -8  -6  -2  101.39    5.10 
  -8  -6  -2  105.99    5.10 
   8   6   2  100.89    4.60 
   8   6   2  106.79    4.90 
   8   6   2  104.09    5.30 
   8   6   2  105.39    4.50 
   8   6   2  104.89    5.00 
   8   6   2   95.69    5.40 
  -9  -6  -2   57.79    4.10 
  -9  -6  -2   71.29    3.90 
  -9  -6  -2   80.39    4.20 
  -9  -6  -2   79.79    4.60 
   9   6   2   78.79    4.00 
   9   6   2   77.19    3.70 
   9   6   2   73.79    4.30 
   9   6   2   76.49    3.90 
 -10  -6  -2   39.80    3.00 
 -10  -6  -2   38.00    2.60 
  10   6   2   34.80    2.20 
  10   6   2   37.50    2.40 
  10   6   2   35.20    2.80 
   4  -7  -2   16.50    1.90 
   4  -7  -2   16.70    2.10 
  -4   7   2   19.20    1.90 
  -4   7   2   16.70    1.80 
   3  -7  -2  115.19    5.80 
   3  -7  -2  104.09    4.80 
   3  -7  -2   94.49    4.80 
   3  -7  -2  110.29    5.60 
  -3   7   2  107.39    5.20 
  -3   7   2  107.19    4.80 
  -3   7   2  115.99    5.30 
   2  -7  -2  126.09    5.60 
   2  -7  -2  119.59    6.30 
   2  -7  -2  118.09    5.80 
   2  -7  -2  119.69    5.60 
   2  -7  -2  122.09    6.40 
  -2   7   2  114.19    6.60 
  -2   7   2  129.79    6.00 
  -2   7   2  125.79    6.00 
  -2   7   2  120.09    6.90 
  -2   7   2  127.99    5.60 
  -2   7   2  121.09   12.50 
   1  -7  -2   43.10    3.50 
   1  -7  -2   37.40    2.80 
   1  -7  -2   40.70    2.70 
   1  -7  -2   37.00    3.10 
   1  -7  -2   38.30    3.30 
   1  -7  -2   37.30    3.90 
   1  -7  -2   36.10    3.10 
   1  -7  -2   36.80    3.20 
  -1   7   2   32.60    3.80 
  -1   7   2   38.40    2.30 
  -1   7   2   30.70    7.80 
  -1   7   2   38.20    3.00 
  -1   7   2   38.40    2.90 
  -1   7   2   37.30    3.60 
  -1   7   2   36.50    3.70 
  -1   7   2   39.60    2.70 
   0  -7  -2   44.00    3.00 
   0  -7  -2   43.40    3.40 
   0  -7  -2   37.00    3.20 
   0  -7  -2   50.49    3.30 
   0  -7  -2   44.80    3.50 
   0  -7  -2   46.60    3.50 
   0  -7  -2   44.20    2.80 
   0  -7  -2   45.80    4.20 
   0   7   2   44.30    2.90 
   0   7   2   41.10    4.10 
   0   7   2   41.80    8.00 
   0   7   2   44.30    3.00 
   0   7   2   43.10    3.10 
   0   7   2   44.70    2.50 
   0   7   2   39.20    3.60 
   0   7   2   39.20    3.00 
   0   7   2   39.20    3.40 
  -1  -7  -2  415.86   16.30 
  -1  -7  -2  448.76   16.70 
  -1  -7  -2  445.86   16.00 
  -1  -7  -2  449.26   15.80 
  -1  -7  -2  437.56   16.20 
  -1  -7  -2  414.46   16.50 
  -1  -7  -2  433.06   16.40 
  -1  -7  -2  460.75   17.80 
   1   7   2  413.16   16.50 
   1   7   2  445.16   18.00 
   1   7   2  425.86   15.50 
   1   7   2  432.56   15.70 
   1   7   2  406.36   16.10 
   1   7   2  411.06   16.20 
  -2  -7  -2  318.47   12.00 
  -2  -7  -2  301.67   11.00 
  -2  -7  -2  275.77   11.10 
  -2  -7  -2  292.67   11.80 
  -2  -7  -2  294.57   11.40 
  -2  -7  -2  285.57   11.10 
  -2  -7  -2  305.07   11.30 
  -2  -7  -2  294.87   11.70 
  -2  -7  -2  332.27   13.00 
   2   7   2  294.27   11.60 
   2   7   2  272.67   11.50 
   2   7   2  284.07   10.70 
   2   7   2  281.57   10.80 
   2   7   2  289.67   12.90 
   2   7   2  274.97   11.30 
   2   7   2  282.57   10.90 
  -3  -7  -2  326.67   12.60 
  -3  -7  -2  318.27   12.20 
  -3  -7  -2  332.87   13.60 
  -3  -7  -2  335.57   12.80 
  -3  -7  -2  313.07   12.20 
  -3  -7  -2  325.47   12.20 
  -3  -7  -2  300.77   12.60 
  -3  -7  -2  310.07   11.80 
  -3  -7  -2  329.57   12.00 
   3   7   2  306.17   11.90 
   3   7   2  344.87   14.10 
   3   7   2  319.87   11.90 
   3   7   2  325.07   12.60 
   3   7   2  314.17   12.30 
   3   7   2  320.67   11.80 
   3   7   2  340.57   12.70 
   3   7   2  316.77   11.70 
  -4  -7  -2  895.21   31.50 
  -4  -7  -2  871.51   32.00 
  -4  -7  -2  894.51   31.50 
  -4  -7  -2  912.31   31.70 
  -4  -7  -2  903.61   32.00 
  -4  -7  -2  929.01   32.90 
  -4  -7  -2  854.11   31.10 
  -4  -7  -2  902.81   31.90 
  -4  -7  -2  898.81   31.30 
   4   7   2  935.11   33.30 
   4   7   2  930.31   31.20 
   4   7   2  863.61   31.80 
   4   7   2  933.01   31.10 
   4   7   2  927.21   32.00 
   4   7   2  894.91   31.70 
   4   7   2  882.41   31.30 
  -5  -7  -2  521.75   18.90 
  -5  -7  -2  529.85   19.80 
  -5  -7  -2  514.95   19.00 
  -5  -7  -2  527.15   19.50 
  -5  -7  -2  529.75   19.00 
  -5  -7  -2  524.95   19.30 
   5   7   2  535.45   19.10 
   5   7   2  545.75   19.40 
   5   7   2  502.05   20.20 
   5   7   2  542.75   18.80 
   5   7   2  526.95   19.50 
   5   7   2  551.94   18.80 
   5   7   2  521.95   20.60 
  -6  -7  -2   12.60    1.90 
  -6  -7  -2   11.30    1.90 
  -6  -7  -2   11.30    1.70 
  -6  -7  -2   11.10    1.60 
  -6  -7  -2   13.80    2.20 
   6   7   2   13.40    1.50 
   6   7   2   11.50    1.90 
   6   7   2   13.10    1.50 
   6   7   2   11.80    1.80 
   6   7   2   13.00    1.80 
  -7  -7  -2   92.39    4.80 
  -7  -7  -2   96.19    5.30 
  -7  -7  -2   86.39    4.50 
  -7  -7  -2   87.99    4.20 
  -7  -7  -2   89.89    4.80 
   7   7   2   89.69    4.20 
   7   7   2   90.09    4.20 
   7   7   2   88.09    4.60 
   7   7   2   83.29    4.20 
  -8  -7  -2  262.47   10.80 
  -8  -7  -2  229.28   10.20 
  -8  -7  -2  257.17   10.10 
  -8  -7  -2  268.77   10.30 
   8   7   2  246.28    9.60 
   8   7   2  254.47   10.40 
   8   7   2  249.08    9.90 
   8   7   2  251.67    9.70 
   8   7   2  269.27   10.20 
  -9  -7  -2  121.29    5.40 
  -9  -7  -2  115.39    5.90 
  -9  -7  -2  112.39    5.30 
   9   7   2  115.59    5.00 
   9   7   2  111.99    5.10 
   9   7   2  113.89    5.60 
   9   7   2  116.19    5.30 
 -10  -7  -2   12.30    1.80 
 -10  -7  -2    7.50    1.20 
  10   7   2   11.60    1.40 
  10   7   2   10.70    1.20 
  10   7   2   10.50    1.20 
   3  -8  -2   21.80    2.30 
  -3   8   2   27.50    2.00 
   2  -8  -2   77.79    3.80 
   2  -8  -2   80.69    3.90 
   2  -8  -2   82.09    4.10 
   2  -8  -2   83.89    4.60 
   2  -8  -2   85.89    4.70 
  -2   8   2   87.69    4.40 
  -2   8   2   87.69    4.10 
  -2   8   2   79.49    4.10 
   1  -8  -2  113.79    6.10 
   1  -8  -2  123.99    5.70 
   1  -8  -2  124.19    5.50 
   1  -8  -2  100.39    5.50 
   1  -8  -2  122.19    6.20 
   1  -8  -2  112.99    5.20 
  -1   8   2  117.29    5.50 
  -1   8   2  129.79    5.50 
  -1   8   2  119.59    5.80 
   0  -8  -2  237.08   11.40 
   0  -8  -2  253.27    9.90 
   0  -8  -2  252.37   10.00 
   0  -8  -2  237.48   10.10 
   0  -8  -2  225.68   10.30 
   0  -8  -2  234.78   10.30 
   0  -8  -2  240.08    9.50 
   0   8   2  243.88    9.60 
   0   8   2  237.58   18.00 
   0   8   2  249.97   10.10 
  -1  -8  -2    9.70    2.40 
  -1  -8  -2   10.30    1.90 
  -1  -8  -2   11.20    1.80 
  -1  -8  -2   11.10    1.80 
  -1  -8  -2   10.00    2.10 
  -1  -8  -2   11.40    1.70 
  -1  -8  -2   11.30    1.90 
   1   8   2   14.50    3.20 
   1   8   2    8.70    1.70 
   1   8   2   12.50    1.50 
   1   8   2   10.50    1.60 
   1   8   2    9.00    1.80 
   1   8   2   22.00   10.10 
  -2  -8  -2  106.49    5.80 
  -2  -8  -2  115.49    5.40 
  -2  -8  -2  111.49    5.50 
  -2  -8  -2  114.29    5.10 
  -2  -8  -2  101.89    5.80 
  -2  -8  -2  110.69    6.70 
  -2  -8  -2  110.79    5.80 
   2   8   2  107.39    5.40 
   2   8   2  105.49    4.60 
   2   8   2  106.19    5.00 
   2   8   2  107.99    6.90 
   2   8   2  105.19    5.60 
   2   8   2  101.99    4.80 
  -3  -8  -2  107.79    5.20 
  -3  -8  -2  112.29    6.60 
  -3  -8  -2  102.19    5.70 
  -3  -8  -2  102.09    5.60 
  -3  -8  -2  102.89    5.10 
  -3  -8  -2  112.79    5.00 
  -3  -8  -2  105.39    5.60 
  -3  -8  -2  101.79    5.20 
   3   8   2  101.99    4.70 
   3   8   2  103.39    6.60 
   3   8   2  107.39    5.60 
   3   8   2  103.69    4.60 
   3   8   2   95.49    5.20 
   3   8   2  103.39    4.70 
  -4  -8  -2  159.08    7.20 
  -4  -8  -2  167.88    7.20 
  -4  -8  -2  165.38    6.90 
  -4  -8  -2  168.08    7.70 
  -4  -8  -2  167.08    7.20 
  -4  -8  -2  170.58    7.80 
  -4  -8  -2  166.88    8.50 
  -4  -8  -2  161.08    7.60 
   4   8   2  157.98    6.90 
   4   8   2  172.88    6.80 
   4   8   2  176.48    7.80 
   4   8   2  180.18    6.80 
   4   8   2  163.08    7.40 
   4   8   2  158.48    8.70 
  -5  -8  -2  564.84   20.70 
  -5  -8  -2  512.45   19.80 
  -5  -8  -2  548.95   20.90 
  -5  -8  -2  563.44   20.20 
  -5  -8  -2  554.74   20.30 
  -5  -8  -2  541.95   20.10 
   5   8   2  578.84   19.80 
   5   8   2  555.04   20.40 
   5   8   2  575.84   20.80 
   5   8   2  529.75   21.90 
   5   8   2  561.14   20.10 
   5   8   2  589.24   19.90 
  -6  -8  -2   36.80    3.30 
  -6  -8  -2   37.50    2.70 
  -6  -8  -2   36.70    3.20 
  -6  -8  -2   41.80    3.00 
  -6  -8  -2   39.80    2.60 
   6   8   2   37.00    3.10 
   6   8   2   40.90    2.90 
   6   8   2   39.30    2.50 
   6   8   2   39.40    2.50 
   6   8   2   35.10    3.00 
  -7  -8  -2   15.00    2.10 
  -7  -8  -2   17.90    2.50 
  -7  -8  -2   13.80    1.80 
  -7  -8  -2   15.90    2.20 
   7   8   2   15.10    1.70 
   7   8   2   19.00    2.30 
   7   8   2   19.90    2.30 
   7   8   2   20.70    2.00 
  -8  -8  -2    9.80    1.60 
  -8  -8  -2    9.80    2.10 
  -8  -8  -2    9.90    1.70 
  -8  -8  -2    9.80    1.80 
   8   8   2    9.40    1.40 
   8   8   2    8.70    1.70 
   8   8   2    8.40    1.40 
   8   8   2   11.40    2.00 
   8   8   2    8.20    1.30 
  -9  -8  -2   12.90    1.60 
  -9  -8  -2   16.40    2.10 
  -9  -8  -2    8.70    1.30 
   9   8   2   20.40    2.30 
   9   8   2   19.40    2.00 
   9   8   2   13.20    1.40 
   9   8   2   11.90    1.30 
   9   8   2   17.70    1.70 
 -10  -8  -2    3.00    1.20 
 -10  -8  -2    3.20    1.00 
 -10  -8  -2    0.80    0.90 
  10   8   2    1.90    1.10 
  10   8   2    0.30    0.90 
   1  -9  -2   19.90    1.90 
   1  -9  -2   16.30    2.00 
   1  -9  -2   18.00    1.70 
   1  -9  -2   17.50    2.10 
  -1   9   2   19.80    1.80 
  -1   9   2   18.10    2.00 
   0  -9  -2   45.10    2.70 
   0  -9  -2   51.89    3.80 
   0  -9  -2   49.20    3.30 
   0  -9  -2   45.30    3.20 
   0  -9  -2   50.19    3.10 
   0  -9  -2   50.49    3.50 
   0   9   2   54.19    3.40 
   0   9   2   55.99    3.20 
  -1  -9  -2   11.50    2.20 
  -1  -9  -2   12.30    1.80 
  -1  -9  -2   12.90    1.90 
  -1  -9  -2   11.90    1.70 
  -1  -9  -2    8.80    1.50 
  -1  -9  -2   10.60    2.70 
   1   9   2    9.60    1.20 
   1   9   2    6.80    1.50 
   1   9   2   10.40    1.60 
   1   9   2   11.30    1.90 
   1   9   2   19.00   11.00 
  -2  -9  -2   35.50    2.60 
  -2  -9  -2   36.60    2.80 
  -2  -9  -2   34.70    3.70 
  -2  -9  -2   41.30    3.40 
  -2  -9  -2   38.70    3.60 
  -2  -9  -2   37.50    3.00 
   2   9   2   36.30    2.40 
   2   9   2   45.80    8.70 
   2   9   2   34.80    3.00 
   2   9   2   40.50    2.70 
   2   9   2   36.20    3.20 
  -3  -9  -2  491.35   17.90 
  -3  -9  -2  466.95   19.00 
  -3  -9  -2  450.65   16.80 
  -3  -9  -2  429.66   17.40 
  -3  -9  -2  487.25   17.30 
  -3  -9  -2  461.25   17.90 
  -3  -9  -2  477.95   17.40 
   3   9   2  464.65   17.80 
   3   9   2  474.05   16.70 
   3   9   2  453.45   16.80 
   3   9   2  447.46   17.40 
   3   9   2  467.45   16.60 
  -4  -9  -2  119.19    5.70 
  -4  -9  -2  132.19    6.40 
  -4  -9  -2  121.99    5.70 
  -4  -9  -2  108.39    6.70 
  -4  -9  -2  126.79    5.80 
  -4  -9  -2  117.29    6.10 
  -4  -9  -2  110.29    5.30 
   4   9   2  123.49    6.20 
   4   9   2  120.29    5.20 
   4   9   2  125.29    5.30 
   4   9   2  117.99    5.80 
  -5  -9  -2  286.57   11.20 
  -5  -9  -2  282.87   11.30 
  -5  -9  -2  288.37   11.80 
  -5  -9  -2  298.27   12.10 
  -5  -9  -2  282.27   11.40 
  -5  -9  -2  284.17   11.20 
   5   9   2  302.77   12.00 
   5   9   2  290.47   11.60 
   5   9   2  293.27   10.90 
   5   9   2  281.77   10.80 
   5   9   2  285.57   11.10 
  -6  -9  -2   44.20    3.20 
  -6  -9  -2   34.50    3.20 
  -6  -9  -2   37.50    2.70 
  -6  -9  -2   45.40    3.40 
  -6  -9  -2   41.70    3.60 
   6   9   2   41.30    2.60 
   6   9   2   38.90    3.10 
   6   9   2   39.70    3.10 
   6   9   2   39.90    2.90 
   6   9   2   43.10    2.60 
  -7  -9  -2   40.10    3.40 
  -7  -9  -2   36.90    3.10 
  -7  -9  -2   38.60    3.00 
   7   9   2   41.60    2.50 
   7   9   2   40.00    3.00 
   7   9   2   39.00    2.40 
   7   9   2   40.90    3.00 
  -8  -9  -2    7.80    1.40 
  -8  -9  -2    8.40    1.50 
  -8  -9  -2    8.90    1.90 
   8   9   2    9.20    1.30 
   8   9   2    9.40    1.20 
   8   9   2    6.80    1.40 
   8   9   2   10.60    1.80 
  -9  -9  -2   35.40    2.50 
  -9  -9  -2   35.10    2.70 
   9   9   2   39.30    2.50 
   9   9   2   34.50    2.00 
   0  10   2   65.69    3.50 
  -1 -10  -2  205.58    7.90 
  -1 -10  -2  197.28    7.80 
  -1 -10  -2  184.98    7.80 
  -1 -10  -2  199.38    8.30 
   1  10   2  192.18    7.90 
   1  10   2  207.18    7.70 
  -2 -10  -2   99.29    4.80 
  -2 -10  -2  100.69    4.70 
  -2 -10  -2  100.09    5.00 
  -2 -10  -2   94.89    5.10 
   2  10   2   89.99    4.70 
   2  10   2   95.19    4.40 
   2  10   2   94.89    4.80 
  -3 -10  -2   34.60    2.80 
  -3 -10  -2   38.10    2.70 
  -3 -10  -2   31.70    3.10 
  -3 -10  -2   39.30    3.10 
   3  10   2   38.10    3.10 
   3  10   2   33.20    2.20 
   3  10   2   33.30    2.30 
   3  10   2   34.50    2.80 
  -4 -10  -2   23.00    2.70 
  -4 -10  -2   26.60    2.60 
  -4 -10  -2   22.70    2.10 
  -4 -10  -2   23.40    2.30 
   4  10   2   19.20    1.80 
   4  10   2   23.10    1.90 
   4  10   2   23.60    2.40 
   4  10   2   25.70    2.70 
  -5 -10  -2  141.29    6.70 
  -5 -10  -2  134.29    6.40 
  -5 -10  -2  131.89    5.90 
  -5 -10  -2  140.39    6.00 
   5  10   2  141.59    6.50 
   5  10   2  127.39    6.10 
   5  10   2  135.69    5.60 
   5  10   2  118.29    5.50 
   5  10   2  130.09    5.50 
  -6 -10  -2  131.29    5.70 
  -6 -10  -2  142.79    6.60 
  -6 -10  -2  137.49    6.30 
  -6 -10  -2  129.09    5.80 
  -6 -10  -2  129.59    5.70 
   6  10   2  127.79    5.40 
   6  10   2  135.39    5.60 
   6  10   2  135.59    6.20 
   6  10   2  123.89    6.00 
   6  10   2  132.99    5.70 
  -7 -10  -2  127.99    5.50 
  -7 -10  -2  127.49    5.70 
  -7 -10  -2  128.29    6.00 
   7  10   2  113.19    4.90 
   7  10   2  118.59    5.00 
   7  10   2  104.09    5.30 
   7  10   2  124.59    5.40 
  -8 -10  -2   86.09    4.40 
  -8 -10  -2   81.69    4.10 
  -8 -10  -2   88.19    4.10 
   8  10   2   74.49    3.50 
   8  10   2   90.69    4.00 
   8  10   2   85.99    3.70 
  -3 -11  -2   22.90    2.30 
  -3 -11  -2   20.60    1.80 
  -3 -11  -2   18.00    2.20 
  -3 -11  -2   25.20    1.80 
   3  11   2   25.00    2.70 
  -4 -11  -2   78.09    3.70 
  -4 -11  -2   82.09    3.80 
  -4 -11  -2   82.69    4.30 
  -4 -11  -2   86.09    4.20 
   4  11   2   80.19    4.10 
   4  11   2   70.39    3.80 
  -5 -11  -2   99.59    4.40 
  -5 -11  -2   93.39    4.40 
  -5 -11  -2  112.49    5.10 
  -5 -11  -2  107.09    4.80 
   5  11   2  110.19    4.80 
   5  11   2   94.09    4.60 
   5  11   2   97.89    4.10 
  -6 -11  -2   57.89    3.20 
  -6 -11  -2   61.69    3.50 
  -6 -11  -2   51.09    2.80 
   6  11   2   58.99    2.70 
   6  11   2   54.29    3.20 
  -7 -11  -2   91.29    5.60 
   6  10  -3   17.70    1.90 
   5  10  -3  210.18    7.80 
   5  10  -3  215.98    8.00 
   5  10  -3  208.78    7.80 
  -5 -10   3  211.88    8.20 
  -5 -10   3  211.98    8.10 
  -5 -10   3  212.78    8.10 
   4  10  -3   72.29    3.20 
   4  10  -3   73.29    3.40 
   4  10  -3   73.09    3.70 
   4  10  -3   76.49    3.30 
  -4 -10   3   71.69    3.40 
  -4 -10   3   67.89    3.80 
  -4 -10   3   74.69    3.50 
  -4 -10   3   74.99    3.60 
  -4 -10   3   71.79    3.50 
   3  10  -3   95.79    4.00 
   3  10  -3   97.99    4.60 
   3  10  -3   94.09    3.90 
  -3 -10   3   94.09    4.20 
  -3 -10   3   93.79    4.10 
  -3 -10   3   94.99    4.30 
  -3 -10   3   93.09    4.40 
   2  10  -3   30.80    2.30 
   2  10  -3   29.40    1.80 
  -2 -10   3   30.10    2.30 
   7   9  -3   45.30    2.30 
   7   9  -3   41.70    2.30 
   7   9  -3   47.60    2.60 
  -7  -9   3   32.90    2.60 
  -7  -9   3   40.00    2.40 
  -7  -9   3   45.70    2.80 
  -7  -9   3   40.00    2.40 
   6   9  -3  373.26   13.00 
   6   9  -3  361.16   12.90 
   6   9  -3  322.87   12.90 
   6   9  -3  372.86   13.40 
  -6  -9   3  376.46   13.30 
  -6  -9   3  366.96   13.60 
  -6  -9   3  355.66   13.10 
  -6  -9   3  348.57   13.10 
  -6  -9   3  364.26   13.30 
   5   9  -3   40.80    2.40 
   5   9  -3   41.50    2.90 
   5   9  -3   34.90    2.30 
   5   9  -3   32.10    2.60 
  -5  -9   3   37.80    2.80 
  -5  -9   3   42.90    3.10 
  -5  -9   3   36.40    2.50 
  -5  -9   3   38.30    2.80 
  -5  -9   3   26.60    3.50 
   4   9  -3  135.99    5.60 
   4   9  -3  141.19    5.60 
   4   9  -3  139.59    5.90 
   4   9  -3  129.49    6.20 
  -4  -9   3  123.79    6.00 
  -4  -9   3  125.99    5.90 
  -4  -9   3  127.39    6.10 
  -4  -9   3  129.29    6.00 
  -4  -9   3  133.19    5.90 
   3   9  -3  143.39    5.90 
   3   9  -3  143.99    6.20 
   3   9  -3  143.29    6.70 
   3   9  -3  146.79    5.90 
  -3  -9   3  137.69    6.70 
  -3  -9   3  142.89    6.30 
  -3  -9   3  141.69    6.50 
  -3  -9   3  145.39    6.50 
  -3  -9   3  149.99    6.30 
  -3  -9   3  132.69    6.30 
   2   9  -3   35.90    2.50 
   2   9  -3   41.60    2.60 
   2   9  -3   41.10    3.30 
   2   9  -3   45.80    2.50 
  -2  -9   3   44.80    2.70 
  -2  -9   3   40.70    2.90 
  -2  -9   3   41.50    3.30 
  -2  -9   3   44.70    3.10 
  -2  -9   3   41.80    3.20 
   1   9  -3   18.10    2.20 
   1   9  -3   16.30    1.50 
   1   9  -3   18.90    1.70 
  -1  -9   3   18.70    2.10 
  -1  -9   3   18.80    1.80 
  -1  -9   3   18.60    2.40 
  -1  -9   3   11.30    1.50 
  -1  -9   3   17.90    2.10 
   0   9  -3  228.68    8.50 
   0   9  -3  224.18    9.10 
   0  -9   3  239.38    9.50 
   0  -9   3  233.48    9.10 
   0  -9   3  231.28    9.00 
   0  -9   3  212.28    8.60 
  -1   9  -3  128.49    5.10 
   1  -9   3  141.19    6.70 
   8   8  -3   71.09    3.10 
   8   8  -3   63.49    3.20 
   8   8  -3   68.69    3.20 
  -8  -8   3   68.29    3.60 
  -8  -8   3   59.69    3.20 
  -8  -8   3   70.09    3.40 
   7   8  -3  168.98    6.60 
   7   8  -3  170.48    6.90 
   7   8  -3  170.28    6.80 
  -7  -8   3  161.18    6.80 
  -7  -8   3  162.18    6.90 
  -7  -8   3  159.98    6.80 
  -7  -8   3  167.28    7.20 
   6   8  -3   94.59    4.60 
   6   8  -3   91.99    4.10 
   6   8  -3   94.09    4.30 
   6   8  -3   99.49    4.80 
   6   8  -3  101.69    4.50 
  -6  -8   3   96.09    4.70 
  -6  -8   3   95.79    4.80 
  -6  -8   3   98.59    4.70 
  -6  -8   3  101.39    5.20 
  -6  -8   3   95.79    4.80 
   5   8  -3  281.67   10.60 
   5   8  -3  304.57   11.20 
   5   8  -3  297.17   11.60 
   5   8  -3  308.87   11.20 
  -5  -8   3  307.37   11.70 
  -5  -8   3  272.97   11.60 
  -5  -8   3  300.27   11.60 
  -5  -8   3  302.47   12.00 
  -5  -8   3  302.77   11.70 
   4   8  -3  214.38   10.40 
   4   8  -3  254.47    9.40 
   4   8  -3  242.18    8.80 
   4   8  -3  238.48   10.10 
   4   8  -3  241.08    9.30 
   4   8  -3  250.17    9.70 
  -4  -8   3  246.88   10.10 
  -4  -8   3  243.98    9.80 
  -4  -8   3  248.38    9.80 
  -4  -8   3  223.48    9.80 
  -4  -8   3  239.48    9.90 
   3   8  -3  334.17   12.40 
   3   8  -3  356.86   13.30 
   3   8  -3  322.27   14.20 
   3   8  -3  367.66   13.00 
   3   8  -3  371.26   14.00 
   3   8  -3  350.46   13.00 
  -3  -8   3  345.77   13.60 
  -3  -8   3  332.97   13.50 
  -3  -8   3  343.47   14.10 
  -3  -8   3  369.46   13.40 
  -3  -8   3  354.36   13.50 
  -3  -8   3  345.27   13.60 
   2   8  -3   20.50    1.90 
   2   8  -3   15.70    2.30 
   2   8  -3   19.90    2.10 
   2   8  -3   18.00    2.90 
   2   8  -3   19.80    1.50 
  -2  -8   3   20.30    2.30 
  -2  -8   3   22.10    2.60 
  -2  -8   3   21.60    2.60 
  -2  -8   3   14.30    1.80 
  -2  -8   3   21.20    2.80 
  -2  -8   3   18.80    2.20 
  -2  -8   3   16.90    2.90 
   1   8  -3  151.78    6.40 
   1   8  -3  150.08    7.70 
   1   8  -3  149.39    6.30 
   1   8  -3  152.08    6.40 
   1   8  -3  153.88    7.30 
  -1  -8   3  162.38    7.70 
  -1  -8   3  148.19    6.60 
  -1  -8   3  153.88    7.10 
  -1  -8   3  158.48    6.90 
  -1  -8   3  142.79    8.10 
   0   8  -3   48.10    3.00 
   0   8  -3   51.09    2.90 
   0   8  -3   52.19    3.70 
   0   8  -3   48.20    2.70 
   0  -8   3   47.00    3.50 
   0  -8   3   47.90    3.50 
   0  -8   3   50.79    3.90 
   0  -8   3   45.30    3.10 
   0  -8   3   42.40    2.80 
  -1   8  -3  163.18    6.50 
  -1   8  -3  164.48    6.40 
  -1   8  -3  153.98    6.90 
   1  -8   3  161.28    7.10 
   1  -8   3  131.89    6.40 
   1  -8   3  167.48    7.60 
   1  -8   3  155.28    7.10 
  -2   8  -3   23.20    1.70 
  -2   8  -3   21.10    1.90 
   2  -8   3   24.10    2.30 
   2  -8   3   24.90    2.40 
   2  -8   3   23.90    2.50 
   9   7  -3   33.20    1.90 
   9   7  -3   35.00    2.10 
  -9  -7   3   34.40    2.10 
   8   7  -3   48.70    2.90 
   8   7  -3   50.29    2.70 
  -8  -7   3   45.10    2.80 
  -8  -7   3   51.99    3.20 
  -8  -7   3   51.39    3.10 
   7   7  -3  136.39    5.40 
   7   7  -3  136.99    6.10 
   7   7  -3  142.29    6.20 
   7   7  -3  147.59    5.90 
  -7  -7   3  144.69    6.60 
  -7  -7   3  135.99    6.20 
  -7  -7   3  140.69    6.30 
  -7  -7   3  136.69    6.10 
   6   7  -3 1170.98   39.50 
   6   7  -3 1102.09   39.80 
   6   7  -3 1242.38   40.20 
   6   7  -3 1163.38   40.40 
  -6  -7   3 1157.78   40.40 
  -6  -7   3 1154.78   40.40 
  -6  -7   3 1165.48   40.50 
  -6  -7   3 1148.29   40.90 
  -6  -7   3 1169.88   40.50 
   5   7  -3   58.99    3.50 
   5   7  -3   37.10    4.80 
   5   7  -3   48.70    2.90 
   5   7  -3   50.79    2.90 
   5   7  -3   55.59    2.70 
   5   7  -3   49.50    2.70 
  -5  -7   3   53.99    3.30 
  -5  -7   3   52.29    3.30 
  -5  -7   3   55.89    4.10 
  -5  -7   3   51.39    3.50 
  -5  -7   3   54.29    3.60 
  -5  -7   3   52.19    3.60 
  -5  -7   3   50.09    3.50 
   4   7  -3   50.79    2.70 
   4   7  -3   44.80    3.40 
   4   7  -3   46.00    2.80 
   4   7  -3   51.89    4.00 
   4   7  -3   53.19    2.70 
   4   7  -3   49.60    2.90 
   4   7  -3   46.90    4.50 
   4   7  -3   50.39    3.30 
  -4  -7   3   51.39    3.50 
  -4  -7   3   54.79    3.40 
  -4  -7   3   49.30    3.30 
  -4  -7   3   49.20    3.50 
  -4  -7   3   47.30    3.10 
  -4  -7   3   50.09    3.70 
  -4  -7   3   48.60    3.50 
  -4  -7   3   50.19    3.80 
   3   7  -3  848.12   28.30 
   3   7  -3  813.02   29.70 
   3   7  -3  796.12   29.10 
   3   7  -3  777.72   30.80 
   3   7  -3  803.52   28.20 
   3   7  -3  836.42   27.80 
   3   7  -3  811.22   27.90 
  -3  -7   3  820.82   28.70 
  -3  -7   3  810.92   29.00 
  -3  -7   3  763.22   29.30 
  -3  -7   3  800.22   28.60 
  -3  -7   3  801.32   28.80 
  -3  -7   3  812.92   28.90 
  -3  -7   3  815.42   29.00 
   2   7  -3  374.56   13.40 
   2   7  -3  381.56   14.80 
   2   7  -3  383.66   13.30 
   2   7  -3  356.36   16.00 
   2   7  -3  367.26   15.10 
   2   7  -3  376.46   13.60 
   2   7  -3  383.26   13.70 
  -2  -7   3  364.76   14.80 
  -2  -7   3  372.76   15.70 
  -2  -7   3  380.06   14.40 
  -2  -7   3  374.46   14.00 
  -2  -7   3  372.16   14.20 
  -2  -7   3  355.36   14.50 
  -2  -7   3  356.46   14.20 
   1   7  -3  366.76   14.10 
   1   7  -3  318.37   15.10 
   1   7  -3  362.16   12.50 
   1   7  -3  363.36   13.00 
   1   7  -3  357.36   14.60 
   1   7  -3  346.37   13.00 
  -1  -7   3  358.06   13.30 
  -1  -7   3  333.27   13.90 
  -1  -7   3  358.66   15.20 
  -1  -7   3  323.17   13.60 
  -1  -7   3  358.76   14.20 
  -1  -7   3  350.26   13.40 
  -1  -7   3  348.07   13.70 
   0   7  -3  273.07   11.00 
   0   7  -3  241.58   12.00 
   0   7  -3  264.37   11.60 
   0   7  -3  265.37   10.10 
   0   7  -3  274.37   10.00 
   0   7  -3  250.47    9.30 
   0  -7   3  256.17   12.10 
   0  -7   3  259.17   10.30 
   0  -7   3  262.47   10.70 
   0  -7   3  250.37   10.10 
   0  -7   3  267.07   10.90 
   0  -7   3  227.78    9.90 
   0  -7   3  241.48   11.30 
   0  -7   3  273.77   11.30 
  -1   7  -3  153.58    6.50 
  -1   7  -3  150.88    6.20 
  -1   7  -3  145.79    7.70 
  -1   7  -3  147.29    7.00 
   1  -7   3  142.99    6.90 
   1  -7   3  147.79    7.40 
   1  -7   3  142.89    8.20 
   1  -7   3  141.89    7.00 
   1  -7   3  141.49    6.10 
   1  -7   3  133.99    6.30 
  -2   7  -3  343.57   13.40 
  -2   7  -3  342.07   12.80 
  -2   7  -3  336.27   12.90 
   2  -7   3  356.26   13.60 
   2  -7   3  330.67   13.00 
   2  -7   3  351.96   14.00 
   2  -7   3  359.96   13.80 
  -3   7  -3  150.98    6.00 
  -3   7  -3  145.49    6.10 
   3  -7   3  141.89    6.70 
   3  -7   3  146.59    6.60 
   3  -7   3  145.59    6.90 
  -4   7  -3   41.90    2.30 
  -4   7  -3   39.70    2.10 
   4  -7   3   38.90    2.70 
   4  -7   3   42.60    2.70 
   4  -7   3   38.20    2.70 
   9   6  -3   21.10    1.70 
   9   6  -3   21.40    1.80 
   9   6  -3   22.40    1.70 
  -9  -6   3   21.60    1.70 
  -9  -6   3   26.50    2.00 
  -9  -6   3   23.30    1.70 
   8   6  -3  191.08    7.20 
   8   6  -3  177.98    7.30 
  -8  -6   3  164.28    7.10 
  -8  -6   3  178.38    7.50 
  -8  -6   3  185.48    7.70 
  -8  -6   3  178.18    7.40 
   7   6  -3  279.77   11.00 
   7   6  -3  296.67   11.20 
   7   6  -3  288.87   10.90 
   7   6  -3  286.97   10.50 
  -7  -6   3  274.27   11.10 
  -7  -6   3  299.37   11.40 
  -7  -6   3  294.27   11.70 
  -7  -6   3  297.87   11.40 
   6   6  -3  132.19    7.90 
   6   6  -3  139.69    5.60 
   6   6  -3  132.49    6.10 
   6   6  -3  139.19    5.90 
   6   6  -3  139.69    5.50 
  -6  -6   3  132.69    6.60 
  -6  -6   3  137.49    6.60 
  -6  -6   3  144.59    6.40 
  -6  -6   3  140.09    6.20 
  -6  -6   3  136.59    6.20 
  -6  -6   3  133.09    6.30 
   5   6  -3  801.32   28.10 
   5   6  -3  811.92   27.80 
   5   6  -3  781.42   30.70 
   5   6  -3  822.62   28.20 
   5   6  -3  799.12   27.90 
   5   6  -3  808.92   28.50 
  -5  -6   3  818.12   28.70 
  -5  -6   3  799.72   28.70 
  -5  -6   3  831.52   29.10 
  -5  -6   3  819.82   28.70 
  -5  -6   3  784.82   28.70 
  -5  -6   3  811.72   28.60 
  -5  -6   3  832.42   29.30 
   4   6  -3  139.59    7.80 
   4   6  -3  135.49    5.80 
   4   6  -3  144.29    5.60 
   4   6  -3  142.99    5.70 
   4   6  -3  138.39    5.80 
   4   6  -3  157.98    8.40 
  -4  -6   3  139.59    6.40 
  -4  -6   3  142.99    6.60 
  -4  -6   3  137.99    6.20 
  -4  -6   3  142.79    6.40 
  -4  -6   3  142.19    6.30 
  -4  -6   3  144.29    6.20 
  -4  -6   3  143.39    6.90 
  -4  -6   3  133.89    6.70 
   3   6  -3  247.68    8.80 
   3   6  -3  247.98    9.00 
   3   6  -3  229.78    9.90 
   3   6  -3  231.58    9.80 
   3   6  -3  245.28   11.30 
   3   6  -3  248.08    9.20 
   3   6  -3  234.18    9.10 
  -3  -6   3  248.88    9.90 
  -3  -6   3  236.98   10.20 
  -3  -6   3  234.98    9.40 
  -3  -6   3  247.38   10.10 
  -3  -6   3  247.28    9.60 
  -3  -6   3  236.38    9.60 
  -3  -6   3  251.97    9.70 
  -3  -6   3  238.18    9.70 
   2   6  -3  322.57   11.30 
   2   6  -3  334.57   13.90 
   2   6  -3  324.37   12.90 
   2   6  -3  320.67   12.50 
   2   6  -3  306.97   11.50 
   2   6  -3  296.17   12.30 
   2   6  -3  330.07   11.40 
  -2  -6   3  309.27   12.00 
  -2  -6   3  307.77   12.10 
  -2  -6   3  315.17   13.20 
  -2  -6   3  312.47   11.90 
  -2  -6   3  290.87   12.20 
  -2  -6   3  317.87   12.40 
  -2  -6   3  314.27   12.70 
  -2  -6   3  308.37   12.20 
  -2  -6   3  310.77   12.30 
   1   6  -3  181.78    8.30 
   1   6  -3  187.58    7.50 
   1   6  -3  200.48    7.40 
   1   6  -3  188.98    7.60 
   1   6  -3  208.28    9.10 
   1   6  -3  196.18    7.30 
   1   6  -3  200.48    9.70 
  -1  -6   3  199.48    8.50 
  -1  -6   3  196.78    8.60 
  -1  -6   3  198.68    8.10 
  -1  -6   3  195.38    7.90 
  -1  -6   3  187.48    8.20 
  -1  -6   3  197.98    7.70 
  -1  -6   3  192.28    9.30 
  -1  -6   3  190.58    8.30 
  -1  -6   3  182.48    8.00 
   0   6  -3   33.40    2.50 
   0   6  -3   31.50    3.60 
   0   6  -3   30.60    2.80 
   0   6  -3   42.60    3.50 
   0   6  -3   35.10    2.10 
   0   6  -3   32.30    2.10 
   0   6  -3   37.60    2.30 
   0  -6   3   32.60    2.50 
   0  -6   3   30.70    3.40 
   0  -6   3   35.90    2.40 
   0  -6   3   32.90    2.90 
   0  -6   3   32.10    2.70 
   0  -6   3   34.70    2.40 
   0  -6   3   33.50    2.90 
   0  -6   3   31.80    2.90 
  -1   6  -3  124.19    4.90 
  -1   6  -3  112.89    6.90 
  -1   6  -3  124.29    6.90 
  -1   6  -3  126.69    5.70 
  -1   6  -3  128.59    5.40 
   1  -6   3  120.79    5.40 
   1  -6   3  118.39    7.10 
   1  -6   3  124.99    6.00 
   1  -6   3  125.59    6.40 
   1  -6   3  114.69    5.60 
   1  -6   3  119.79    6.20 
  -2   6  -3  218.28    8.80 
  -2   6  -3  221.98   10.20 
  -2   6  -3  210.38    9.20 
  -2   6  -3  213.18    8.50 
   2  -6   3  203.78    8.50 
   2  -6   3  212.18   10.70 
   2  -6   3  218.58    9.80 
   2  -6   3  223.98    9.40 
  -3   6  -3   10.80    2.50 
  -3   6  -3    9.20    1.60 
  -3   6  -3    5.70    1.40 
  -3   6  -3    6.40    1.30 
   3  -6   3    6.70    1.80 
   3  -6   3    8.70    2.40 
   3  -6   3    9.80    2.20 
   3  -6   3    7.90    1.40 
  -4   6  -3   45.80    2.90 
  -4   6  -3   39.60    2.80 
  -4   6  -3   46.80    2.60 
   4  -6   3   45.10    3.50 
   4  -6   3   47.40    3.40 
   4  -6   3   42.40    2.70 
  -5   6  -3  166.88    6.50 
  -5   6  -3  172.88    6.50 
  -5   6  -3  159.18    6.80 
   5  -6   3  191.48    7.40 
   5  -6   3  175.08    7.10 
   5  -6   3  157.58    7.20 
   5  -6   3  175.18    7.20 
   9   5  -3   91.29    3.90 
   9   5  -3   87.19    3.90 
   9   5  -3   83.29    3.90 
  -9  -5   3   81.89    3.80 
  -9  -5   3   84.99    4.00 
  -9  -5   3   82.39    3.90 
  -9  -5   3   78.49    3.80 
   8   5  -3  165.88    6.90 
   8   5  -3  170.28    6.80 
   8   5  -3  164.38    7.00 
   8   5  -3  163.38    6.40 
  -8  -5   3  171.28    7.10 
  -8  -5   3  150.48    6.70 
  -8  -5   3  172.58    7.10 
  -8  -5   3  170.28    6.90 
   7   5  -3   35.20    2.30 
   7   5  -3   41.20    2.60 
   7   5  -3   43.00    2.30 
   7   5  -3   37.90    2.80 
  -7  -5   3   38.60    3.20 
  -7  -5   3   40.50    3.20 
  -7  -5   3   37.30    2.70 
  -7  -5   3   39.40    3.00 
  -7  -5   3   43.70    3.10 
   6   5  -3  136.19    5.40 
   6   5  -3  141.59    5.70 
   6   5  -3  131.09    5.80 
   6   5  -3  127.89    7.60 
   6   5  -3  135.39    5.50 
  -6  -5   3  135.79    6.50 
  -6  -5   3  131.09    6.00 
  -6  -5   3  133.79    6.20 
  -6  -5   3  132.19    6.20 
  -6  -5   3  132.49    5.90 
  -6  -5   3  135.39    6.40 
  -6  -5   3  140.59    6.10 
  -6  -5   3  131.89    6.50 
   5   5  -3   37.80    3.00 
   5   5  -3   42.10    4.10 
   5   5  -3   42.30    2.50 
   5   5  -3   47.70    2.30 
   5   5  -3   40.80    2.70 
   5   5  -3   42.50    2.40 
  -5  -5   3   43.60    2.90 
  -5  -5   3   41.30    2.80 
  -5  -5   3   45.40    2.90 
  -5  -5   3   46.30    3.20 
  -5  -5   3   43.40    2.90 
  -5  -5   3   42.40    3.50 
  -5  -5   3   45.30    3.30 
   4   5  -3  120.89    5.00 
   4   5  -3  130.49    4.90 
   4   5  -3  114.49    5.00 
   4   5  -3  124.79    4.80 
   4   5  -3  120.79    5.70 
   4   5  -3  124.79    6.90 
  -4  -5   3  118.89    5.40 
  -4  -5   3  116.59    5.70 
  -4  -5   3  127.39    6.00 
  -4  -5   3  121.19    5.70 
  -4  -5   3  126.79    5.60 
  -4  -5   3  123.49    5.50 
  -4  -5   3  121.89    5.60 
  -4  -5   3  125.39    5.40 
   3   5  -3  147.69    5.40 
   3   5  -3  148.09    7.40 
   3   5  -3  138.99    6.20 
   3   5  -3  138.09    5.40 
  -3  -5   3  130.49    6.10 
  -3  -5   3  138.39    6.00 
  -3  -5   3  140.39    5.90 
  -3  -5   3  136.09    6.00 
  -3  -5   3  136.39    6.40 
  -3  -5   3  142.69    6.40 
  -3  -5   3  137.89    6.10 
   2   5  -3  648.34   21.60 
   2   5  -3  653.73   22.60 
   2   5  -3  673.53   23.90 
  -2  -5   3  650.53   22.40 
  -2  -5   3  612.54   22.20 
  -2  -5   3  640.14   23.20 
  -2  -5   3  598.94   22.90 
  -2  -5   3  530.65   23.70 
   1   5  -3  936.71   32.20 
   1   5  -3  944.81   30.80 
   1   5  -3  892.61   31.60 
   1   5  -3  924.91   32.90 
  -1  -5   3  880.91   31.40 
  -1  -5   3  866.41   32.30 
  -1  -5   3  916.71   32.60 
  -1  -5   3  833.02   31.80 
  -1  -5   3  926.01   31.80 
   0   5  -3   16.40    2.00 
   0   5  -3   15.10    1.30 
   0   5  -3   15.10    1.40 
   0   5  -3   16.20    2.40 
   0   5  -3   15.00    1.30 
   0   5  -3   16.20    1.90 
   0   5  -3   11.30    8.20 
   0   5  -3   16.80    2.40 
   0   5  -3   17.20    1.80 
   0  -5   3   15.60    1.90 
   0  -5   3   15.50    1.90 
   0  -5   3   17.80    1.80 
   0  -5   3   16.90    2.40 
   0  -5   3   16.00    2.30 
   0  -5   3   15.40    1.50 
   0  -5   3   15.80    1.90 
  -1   5  -3   15.00    1.90 
  -1   5  -3   13.20    2.50 
  -1   5  -3   11.90    1.70 
  -1   5  -3   12.10    1.80 
  -1   5  -3   11.40    1.70 
  -1   5  -3   12.50    1.30 
  -1   5  -3   14.50    1.50 
  -1   5  -3   13.30    1.30 
  -1   5  -3    1.70    6.30 
  -1   5  -3   13.60    2.30 
   1  -5   3   11.00    1.70 
   1  -5   3   16.30    1.70 
   1  -5   3   14.20    2.50 
   1  -5   3   12.30    1.90 
   1  -5   3   13.30    2.10 
   1  -5   3   19.20    1.90 
  -2   5  -3  248.98   10.20 
  -2   5  -3  255.97   11.20 
  -2   5  -3  258.87    9.30 
  -2   5  -3  252.27   10.00 
  -2   5  -3  269.37    9.80 
   2  -5   3  248.28    9.80 
   2  -5   3  261.27   10.50 
   2  -5   3  248.28   10.80 
   2  -5   3  263.77   11.90 
  -3   5  -3   16.30    2.10 
  -3   5  -3   22.50    3.30 
  -3   5  -3   18.60    1.80 
  -3   5  -3   16.20    2.10 
   3  -5   3   18.80    3.30 
   3  -5   3   20.30    2.10 
   3  -5   3   19.80    2.70 
   3  -5   3   15.90    2.30 
  -4   5  -3   81.49    5.50 
  -4   5  -3   83.59    4.80 
  -4   5  -3   92.39    4.60 
  -4   5  -3   88.49    4.20 
   4  -5   3   83.79    4.40 
   4  -5   3   88.19    5.20 
   4  -5   3   91.79    5.10 
  -5   5  -3  182.18    7.70 
  -5   5  -3  172.88    7.20 
  -5   5  -3  184.98    7.10 
   5  -5   3  168.78    7.20 
   5  -5   3  178.98    7.90 
   5  -5   3  179.68    8.10 
  -6   5  -3   77.59    3.40 
  -6   5  -3   83.19    4.00 
   6  -5   3   74.29    3.90 
   6  -5   3   75.09    3.50 
   6  -5   3   86.49    4.10 
   9   4  -3  222.98    8.20 
   9   4  -3  207.28    8.10 
   9   4  -3  223.58    8.20 
  -9  -4   3  201.88    8.10 
  -9  -4   3  209.48    8.20 
  -9  -4   3  207.38    8.10 
   8   4  -3   53.39    3.30 
   8   4  -3   56.59    3.10 
   8   4  -3   53.19    2.60 
   8   4  -3   55.19    3.30 
  -8  -4   3   58.19    3.50 
  -8  -4   3   55.19    3.30 
  -8  -4   3   48.60    3.50 
  -8  -4   3   55.39    3.30 
  -8  -4   3   55.99    3.30 
   7   4  -3  284.57   11.10 
   7   4  -3  308.27   11.00 
   7   4  -3  304.07   11.50 
   7   4  -3  313.97   11.80 
  -7  -4   3  299.47   11.90 
  -7  -4   3  304.97   12.30 
  -7  -4   3  308.97   11.70 
  -7  -4   3  312.87   11.90 
  -7  -4   3  300.47   12.10 
   6   4  -3  149.59    6.20 
   6   4  -3  137.09    7.80 
   6   4  -3  136.69    5.90 
   6   4  -3  142.89    5.60 
   6   4  -3  139.69    5.70 
  -6  -4   3  140.99    6.20 
  -6  -4   3  146.69    6.40 
  -6  -4   3  136.49    6.60 
  -6  -4   3  150.08    6.80 
  -6  -4   3  137.09    6.20 
  -6  -4   3  149.49    6.40 
  -6  -4   3  146.69    6.90 
   5   4  -3  398.26   14.80 
   5   4  -3  413.66   15.70 
   5   4  -3  411.56   14.60 
   5   4  -3  394.26   15.00 
   5   4  -3  434.46   17.10 
   5   4  -3  438.26   14.70 
  -5  -4   3  428.96   15.90 
  -5  -4   3  421.36   15.40 
  -5  -4   3  402.96   15.10 
  -5  -4   3  427.36   15.70 
  -5  -4   3  414.06   15.30 
  -5  -4   3  413.46   15.20 
  -5  -4   3  412.86   15.70 
  -5  -4   3  420.96   15.60 
  -5  -4   3  407.36   15.20 
   4   4  -3  697.13   25.50 
   4   4  -3  669.33   24.20 
   4   4  -3  665.33   23.30 
   4   4  -3  685.03   24.20 
  -4  -4   3  664.53   23.90 
  -4  -4   3  710.53   24.20 
  -4  -4   3  673.43   23.90 
  -4  -4   3  651.33   27.10 
  -4  -4   3  690.93   24.40 
   3   4  -3  779.72   26.70 
   3   4  -3  809.02   28.70 
   3   4  -3  789.22   27.50 
   3   4  -3  780.92   27.40 
  -3  -4   3  764.32   30.10 
   2   4  -3 1269.87   43.30 
   2   4  -3 1219.98   41.40 
   2   4  -3 1257.87   42.20 
   2   4  -3 1210.28   48.90 
  -2  -4   3 1212.58   42.00 
  -2  -4   3 1183.38   42.50 
  -2  -4   3 1237.48   42.50 
   1   4  -3 2511.85   84.79 
   1   4  -3 2484.05   83.79 
   1   4  -3 2613.44   90.99 
   1   4  -3 2385.86   82.99 
  -1  -4   3 2486.35   84.29 
  -1  -4   3 2377.26   84.39 
  -1  -4   3 2485.25   83.79 
   0   4  -3   33.60    2.80 
   0   4  -3   31.60    1.60 
   0   4  -3   33.80    2.20 
   0   4  -3   25.40    5.80 
   0   4  -3   33.30    2.60 
   0  -4   3   29.70    2.50 
   0  -4   3   32.20    2.70 
   0  -4   3   30.80    2.30 
  -1   4  -3   68.99    2.90 
  -1   4  -3   64.59    3.60 
  -1   4  -3   65.69    3.40 
  -1   4  -3   65.09    3.60 
  -1   4  -3   64.19    3.90 
  -1   4  -3   60.69    4.00 
  -1   4  -3   62.79    8.10 
   1  -4   3   66.99    4.00 
   1  -4   3   65.09    3.60 
   1  -4   3   63.79    4.20 
  -2   4  -3  511.45   17.10 
  -2   4  -3  481.85   17.00 
  -2   4  -3  475.75   18.20 
  -2   4  -3  489.95   17.70 
  -2   4  -3  528.65   18.70 
  -2   4  -3  485.95   18.10 
  -2   4  -3  479.95   17.80 
  -2   4  -3  479.75   18.60 
  -2   4  -3  506.95   17.30 
   2  -4   3  421.06   18.60 
   2  -4   3  498.15   18.50 
   2  -4   3  480.35   17.90 
   2  -4   3  480.05   17.40 
   2  -4   3  504.25   18.20 
   2  -4   3  507.75   19.20 
   2  -4   3  487.85   18.20 
  -3   4  -3  327.87   13.00 
  -3   4  -3  336.97   12.90 
  -3   4  -3  317.57   11.90 
  -3   4  -3  348.37   12.70 
  -3   4  -3  333.87   13.30 
  -3   4  -3  359.46   14.00 
  -3   4  -3  350.96   12.50 
   3  -4   3  351.26   14.50 
   3  -4   3  322.27   12.80 
   3  -4   3  339.17   13.10 
   3  -4   3  336.87   13.40 
   3  -4   3  331.97   12.50 
  -4   4  -3  356.36   13.40 
  -4   4  -3  346.97   14.70 
  -4   4  -3  367.16   13.90 
  -4   4  -3  367.76   13.20 
   4  -4   3  348.57   13.60 
   4  -4   3  355.26   14.00 
   4  -4   3  345.27   15.30 
   4  -4   3  347.77   14.20 
   4  -4   3  362.46   13.30 
  -5   4  -3  660.13   23.80 
  -5   4  -3  698.03   23.80 
  -5   4  -3  686.63   24.60 
  -5   4  -3  620.74   25.20 
   5  -4   3  700.83   24.00 
   5  -4   3  642.24   24.70 
   5  -4   3  662.33   24.20 
   5  -4   3  719.43   24.80 
  -6   4  -3  314.87   12.10 
  -6   4  -3  310.87   11.40 
   6  -4   3  295.87   12.20 
   6  -4   3  315.77   11.60 
   6  -4   3  303.97   12.20 
  -7   4  -3  217.38    8.60 
   7  -4   3  229.68    8.80 
   7  -4   3  220.38    8.30 
   9   3  -3  180.28    6.90 
   9   3  -3  177.78    6.80 
   9   3  -3  165.08    6.70 
  -9  -3   3  180.58    7.00 
  -9  -3   3  169.28    6.90 
  -9  -3   3  164.28    6.80 
   8   3  -3   19.20    3.10 
   8   3  -3   28.30    2.20 
   8   3  -3   27.80    2.20 
   8   3  -3   28.00    2.60 
  -8  -3   3   32.40    2.70 
  -8  -3   3   23.50    2.60 
  -8  -3   3   26.30    2.40 
  -8  -3   3   30.50    2.50 
  -8  -3   3   27.20    2.40 
   7   3  -3  156.58    9.10 
   7   3  -3  190.68    7.70 
   7   3  -3  185.98    7.50 
   7   3  -3  180.78    7.10 
   7   3  -3  183.68    8.40 
   7   3  -3  185.98    7.30 
  -7  -3   3  189.18    7.80 
  -7  -3   3  190.68    8.30 
  -7  -3   3  200.98    8.10 
  -7  -3   3  194.08    7.90 
   6   3  -3   91.39    4.10 
   6   3  -3   87.49    3.90 
   6   3  -3   85.59    4.30 
   6   3  -3   86.19    5.60 
   6   3  -3   83.89    4.60 
   6   3  -3   85.89    3.90 
   6   3  -3   85.39    5.60 
   6   3  -3   92.49    3.80 
   6   3  -3   88.49    4.80 
  -6  -3   3   84.99    4.60 
  -6  -3   3   93.39    4.40 
  -6  -3   3   87.99    4.90 
  -6  -3   3   90.39    4.50 
  -6  -3   3   81.29    4.50 
  -6  -3   3   87.09    5.10 
  -6  -3   3   92.59    4.80 
   5   3  -3  411.96   15.00 
   5   3  -3  416.36   15.10 
   5   3  -3  418.86   15.30 
   5   3  -3  435.76   16.90 
   5   3  -3  419.26   16.00 
   5   3  -3  447.46   15.20 
   5   3  -3  432.56   16.00 
  -5  -3   3  440.26   15.80 
  -5  -3   3  416.46   16.10 
  -5  -3   3  441.66   16.20 
  -5  -3   3  424.96   15.60 
  -5  -3   3  457.65   16.10 
  -5  -3   3  449.66   16.20 
  -5  -3   3  435.86   15.60 
  -5  -3   3  421.66   15.70 
  -5  -3   3  425.06   15.90 
   4   3  -3   84.99    4.20 
   4   3  -3   77.19    3.80 
   4   3  -3   80.99    3.30 
   4   3  -3   82.89    4.40 
   4   3  -3   81.09    4.00 
   4   3  -3   80.39    3.30 
  -4  -3   3   79.19    6.00 
  -4  -3   3   86.69    4.10 
   3   3  -3   11.80    2.10 
   3   3  -3   10.30    0.90 
   3   3  -3   12.10    0.80 
   3   3  -3   11.60    1.50 
  -3  -3   3   12.50    2.40 
  -3  -3   3   11.20    1.40 
   2   3  -3 1189.48   38.20 
   2   3  -3 1171.88   39.10 
   2   3  -3 1078.49   37.90 
  -2  -3   3 1098.19   40.20 
  -2  -3   3 1095.29   38.10 
  -2  -3   3 1044.20   37.70 
   1   3  -3  302.37   10.90 
   1   3  -3  303.37   11.60 
   1   3  -3  333.37   15.90 
   1   3  -3  285.97   10.50 
  -1  -3   3  282.47   10.80 
  -1  -3   3  301.97   11.20 
  -1  -3   3  277.97   11.20 
   0   3  -3  471.55   21.90 
   0   3  -3  504.95   17.40 
   0   3  -3  498.25   18.10 
   0   3  -3  479.55   17.70 
   0  -3   3  520.55   17.60 
   0  -3   3  480.15   18.00 
   0  -3   3  494.75   17.90 
  -1   3  -3 1007.40   34.80 
  -1   3  -3  990.30   34.90 
  -1   3  -3 1023.80   34.70 
  -1   3  -3  973.50   33.80 
  -1   3  -3 1027.50   39.60 
  -1   3  -3  988.50   34.20 
   1  -3   3 1012.00   34.50 
   1  -3   3  965.30   35.10 
   1  -3   3 1005.60   35.00 
  -2   3  -3  503.55   24.90 
  -2   3  -3  583.04   19.80 
  -2   3  -3  591.64   20.90 
  -2   3  -3  582.84   20.70 
  -2   3  -3  580.14   20.60 
  -2   3  -3  562.04   20.80 
  -2   3  -3  578.34   20.10 
   2  -3   3  589.94   20.60 
   2  -3   3  570.94   21.00 
   2  -3   3  594.74   21.40 
  -3   3  -3  151.28    6.70 
  -3   3  -3  152.28    7.00 
  -3   3  -3  157.58    5.90 
  -3   3  -3  149.09    5.80 
  -3   3  -3  151.48    6.10 
  -3   3  -3  157.48    6.60 
  -3   3  -3  166.48    7.30 
  -3   3  -3  159.08    7.00 
   3  -3   3  147.59    7.10 
   3  -3   3  155.78    6.20 
   3  -3   3  154.68    6.60 
   3  -3   3  155.88    7.60 
   3  -3   3  151.28    6.90 
  -4   3  -3  695.83   24.40 
  -4   3  -3  689.43   24.60 
  -4   3  -3  688.33   23.80 
  -4   3  -3  667.63   24.80 
  -4   3  -3  628.74   23.30 
  -4   3  -3  649.54   24.90 
  -4   3  -3  714.53   25.30 
   4  -3   3  662.13   23.80 
   4  -3   3  673.93   25.80 
   4  -3   3  704.63   24.00 
   4  -3   3  697.53   24.60 
   4  -3   3  691.83   24.80 
  -5   3  -3  334.27   12.50 
  -5   3  -3  317.37   13.00 
  -5   3  -3  349.27   13.40 
  -5   3  -3  339.07   12.50 
  -5   3  -3  323.57   13.90 
   5  -3   3  342.57   13.30 
   5  -3   3  341.77   12.60 
   5  -3   3  327.57   13.40 
  -6   3  -3  384.56   14.20 
  -6   3  -3  367.66   15.60 
  -6   3  -3  404.66   15.10 
   6  -3   3  351.86   14.90 
   6  -3   3  406.46   14.50 
   6  -3   3  412.16   15.20 
  -7   3  -3   25.60    1.90 
  -7   3  -3   23.30    2.30 
  -7   3  -3   23.60    2.50 
   7  -3   3   23.70    2.10 
   7  -3   3   22.40    2.40 
   7  -3   3   27.20    2.70 
   9   2  -3  226.68    8.60 
   9   2  -3  224.38    8.50 
  -9  -2   3  228.48    8.70 
  -9  -2   3  226.08    8.60 
  -9  -2   3  222.38    8.50 
   8   2  -3  337.57   12.10 
   8   2  -3  335.27   12.20 
   8   2  -3  302.47   11.90 
  -8  -2   3  308.47   12.10 
  -8  -2   3  297.77   12.20 
  -8  -2   3  334.87   12.40 
  -8  -2   3  336.47   12.30 
   7   2  -3  258.27   11.30 
   7   2  -3  287.97   10.70 
   7   2  -3  260.27   10.30 
   7   2  -3  276.67    9.80 
   7   2  -3  283.97   10.40 
  -7  -2   3  249.78   10.60 
  -7  -2   3  265.67   10.90 
  -7  -2   3  286.97   12.20 
  -7  -2   3  253.07   11.10 
  -7  -2   3  275.57   10.80 
  -7  -2   3  276.27   10.60 
  -7  -2   3  251.07   10.40 
   6   2  -3    6.20    1.10 
   6   2  -3    8.20    1.10 
   6   2  -3    9.40    2.30 
   6   2  -3    9.20    1.30 
   6   2  -3    7.00    1.30 
   6   2  -3   10.00    2.00 
  -6  -2   3    8.10    1.70 
  -6  -2   3    5.80    1.50 
  -6  -2   3    6.10    1.30 
  -6  -2   3    5.30    1.80 
  -6  -2   3    7.70    1.40 
  -6  -2   3    6.50    1.60 
  -6  -2   3    7.20    1.50 
   5   2  -3  134.19    5.60 
   5   2  -3  140.99    5.40 
   5   2  -3  138.59    5.70 
   5   2  -3  142.29    6.30 
   5   2  -3  133.29    5.80 
   5   2  -3  148.29    7.30 
   5   2  -3  146.59    6.50 
   5   2  -3  147.29    5.60 
  -5  -2   3  142.39    6.00 
  -5  -2   3  136.89    6.20 
  -5  -2   3  143.39    6.10 
  -5  -2   3  148.09    6.60 
  -5  -2   3  149.19    6.40 
  -5  -2   3  142.09    6.60 
  -5  -2   3  155.78    6.90 
  -5  -2   3  145.69    6.10 
   4   2  -3  184.48    7.40 
   4   2  -3  185.48    8.10 
   4   2  -3  177.88    7.40 
   4   2  -3  185.88    7.60 
   4   2  -3  186.58    6.70 
   4   2  -3  183.48    6.80 
  -4  -2   3  182.38    9.90 
  -4  -2   3  181.98    7.40 
  -4  -2   3  187.48    7.80 
   3   2  -3 1374.46   48.00 
   3   2  -3 1385.96   46.90 
   3   2  -3 1437.06   47.60 
   3   2  -3 1303.57   47.40 
   3   2  -3 1418.96   47.70 
  -3  -2   3 1403.56   50.09 
  -3  -2   3 1412.36   47.50 
  -3  -2   3 1431.66   47.80 
   2   2  -3  106.99    4.00 
   2   2  -3  112.29    4.60 
   2   2  -3  117.49    4.60 
   2   2  -3  102.69    4.60 
  -2  -2   3  111.69    4.40 
  -2  -2   3  112.29    4.50 
  -2  -2   3  113.09    6.20 
   1   2  -3   81.79    3.40 
   1   2  -3   74.59    2.70 
   1   2  -3   77.29    3.20 
   1   2  -3   78.09    3.90 
  -1  -2   3   79.79    3.50 
  -1  -2   3   83.79    4.70 
  -1  -2   3   75.69    3.20 
   0   2  -3  218.48    7.70 
   0   2  -3  201.48    7.40 
   0   2  -3  205.28    7.30 
   0   2  -3  214.28    8.20 
   0  -2   3  213.48    8.10 
   0  -2   3  216.18    7.80 
   0  -2   3  205.48    8.10 
  -1   2  -3 1158.78   38.40 
  -1   2  -3 1109.39   38.30 
  -1   2  -3 1069.89   38.30 
  -1   2  -3 1113.99   37.90 
   1  -2   3 1097.09   38.60 
   1  -2   3 1131.49   38.20 
   1  -2   3 1145.29   38.50 
  -2   2  -3  658.43   30.00 
  -2   2  -3  785.62   27.10 
  -2   2  -3  817.62   27.10 
  -2   2  -3  829.02   27.20 
  -2   2  -3  756.92   26.50 
  -2   2  -3  750.72   27.00 
   2  -2   3  811.42   27.40 
   2  -2   3  790.02   27.00 
   2  -2   3  774.22   27.60 
  -3   2  -3  104.99    5.00 
  -3   2  -3  102.19    4.00 
  -3   2  -3  103.89    4.60 
  -3   2  -3  104.79    4.90 
  -3   2  -3  104.79    4.90 
   3  -2   3  100.09    5.20 
   3  -2   3   94.79    4.90 
  -4   2  -3   85.69    4.50 
  -4   2  -3   84.99    4.20 
  -4   2  -3   87.09    4.70 
  -4   2  -3   80.79    3.50 
  -4   2  -3   82.19    4.50 
  -4   2  -3   79.59    3.70 
  -4   2  -3   81.19    3.40 
  -4   2  -3   81.49    4.30 
   4  -2   3   78.49    4.80 
   4  -2   3   67.99    5.30 
   4  -2   3   80.59    3.70 
   4  -2   3   85.39    4.20 
  -5   2  -3  161.38    7.90 
  -5   2  -3  163.18    7.10 
  -5   2  -3  178.48    7.60 
  -5   2  -3  167.88    6.70 
  -5   2  -3  157.08    7.80 
  -5   2  -3  173.28    7.40 
  -5   2  -3  171.58    7.90 
   5  -2   3  175.78    6.90 
   5  -2   3  164.58    6.70 
   5  -2   3  154.98    7.40 
   5  -2   3  161.38    7.30 
  -6   2  -3    4.70    1.60 
  -6   2  -3    4.50    1.10 
  -6   2  -3    3.00    1.50 
  -6   2  -3    3.70    1.80 
  -6   2  -3    4.00    1.40 
  -6   2  -3    3.10    1.50 
   6  -2   3    1.50    1.30 
   6  -2   3    3.00    1.50 
   6  -2   3    5.70    1.20 
   6  -2   3    5.00    1.40 
  -7   2  -3   86.79    4.90 
  -7   2  -3   82.19    4.60 
  -7   2  -3   84.79    4.00 
  -7   2  -3   78.09    4.40 
   7  -2   3   88.69    4.40 
   7  -2   3   89.29    5.00 
  -8   2  -3   12.60    1.30 
  -8   2  -3   10.30    1.40 
  -8   2  -3   13.60    1.70 
  -8   2  -3   13.80    1.80 
   8  -2   3   19.00    2.30 
   8  -2   3   11.40    1.40 
   9   1  -3   35.00    2.10 
   9   1  -3   33.40    2.10 
  -9  -1   3   35.40    2.10 
  -9  -1   3   32.50    2.10 
  -9  -1   3   33.50    2.00 
  -9  -1   3   44.10    3.40 
   8   1  -3  141.79    5.90 
   8   1  -3  130.29    6.50 
   8   1  -3  133.99    5.90 
  -8  -1   3  143.39    6.10 
  -8  -1   3  136.09    6.20 
  -8  -1   3  137.69    5.90 
  -8  -1   3  140.19    6.20 
   7   1  -3   10.50    1.50 
   7   1  -3    3.80    0.90 
   7   1  -3    2.50    1.30 
   7   1  -3    3.90    1.70 
  -7  -1   3    4.10    1.40 
  -7  -1   3    2.50    1.30 
  -7  -1   3    7.20    1.60 
  -7  -1   3    1.80    1.10 
   6   1  -3  622.44   22.40 
   6   1  -3  604.84   20.80 
   6   1  -3  617.94   21.50 
   6   1  -3  630.54   21.00 
   6   1  -3  595.74   21.20 
   6   1  -3  594.34   23.60 
   6   1  -3  568.84   21.10 
  -6  -1   3  586.24   21.70 
  -6  -1   3  590.14   21.50 
  -6  -1   3  590.84   22.50 
  -6  -1   3  616.64   22.00 
  -6  -1   3  600.74   21.80 
  -6  -1   3  605.54   22.30 
  -6  -1   3  573.34   21.40 
   5   1  -3  217.38    8.90 
   5   1  -3  248.58    8.70 
   5   1  -3  228.58    8.80 
   5   1  -3  238.08    8.60 
   5   1  -3  238.78   10.70 
   5   1  -3  251.27    9.80 
   5   1  -3  238.38    8.80 
  -5  -1   3  228.38    9.80 
  -5  -1   3  242.58    9.70 
  -5  -1   3  232.18    9.40 
  -5  -1   3  238.88    9.30 
  -5  -1   3  219.38    9.00 
  -5  -1   3  248.88   10.00 
  -5  -1   3  247.48    9.50 
  -5  -1   3  237.88    9.10 
   4   1  -3  347.87   13.90 
   4   1  -3  337.77   13.10 
   4   1  -3  358.26   13.10 
   4   1  -3  337.97   12.20 
   4   1  -3  345.77   12.30 
  -4  -1   3  365.36   13.30 
  -4  -1   3  342.27   15.90 
  -4  -1   3  350.96   12.90 
   3   1  -3  754.82   25.50 
   3   1  -3  731.13   26.00 
   3   1  -3  777.42   26.70 
   3   1  -3  766.22   26.20 
  -3  -1   3  716.13   25.90 
  -3  -1   3  755.22   26.20 
  -3  -1   3  751.02   28.60 
   2   1  -3   22.60    1.60 
   2   1  -3   23.30    1.80 
   2   1  -3   22.60    1.60 
   2   1  -3   25.00    1.20 
  -2  -1   3   24.50    2.70 
  -2  -1   3   23.30    1.70 
  -2  -1   3   23.00    1.50 
   1   1  -3  706.13   22.90 
   1   1  -3  655.93   22.50 
   1   1  -3  627.84   22.90 
  -1  -1   3  683.23   24.40 
  -1  -1   3  664.63   22.90 
   0   1  -3   57.79    2.60 
   0   1  -3   59.49    2.40 
   0  -1   3   62.79    2.90 
  -1   1  -3 1109.89   37.60 
  -1   1  -3 1069.59   37.00 
  -1   1  -3 1116.89   37.10 
  -1   1  -3 1061.39   37.40 
   1  -1   3 1158.68   37.70 
  -2   1  -3 4362.16  143.99 
  -2   1  -3 4287.17  142.99 
  -2   1  -3 4142.49  142.69 
  -2   1  -3 4008.40  142.09 
  -2   1  -3 4021.00  143.19 
   2  -1   3 4227.08  144.09 
   2  -1   3 4402.96  142.29 
   2  -1   3 4245.08  143.69 
   2  -1   3 4283.17  141.79 
   2  -1   3 4429.16  143.39 
  -3   1  -3  517.35   18.20 
  -3   1  -3  539.65   18.60 
  -3   1  -3  489.45   18.40 
  -3   1  -3  546.25   18.60 
   3  -1   3  511.75   18.60 
   3  -1   3  520.85   19.00 
   3  -1   3  497.35   18.10 
   3  -1   3  522.25   17.60 
   3  -1   3  511.05   18.50 
  -4   1  -3  993.70   35.10 
  -4   1  -3 1027.00   36.10 
  -4   1  -3 1038.50   36.20 
  -4   1  -3 1056.79   35.80 
  -4   1  -3 1062.79   36.20 
   4  -1   3 1048.50   36.30 
   4  -1   3 1040.20   35.00 
   4  -1   3 1030.50   36.10 
   4  -1   3 1004.60   35.60 
  -5   1  -3  347.07   12.50 
  -5   1  -3  348.27   13.50 
  -5   1  -3  366.56   13.10 
  -5   1  -3  364.96   13.70 
  -5   1  -3  335.27   12.00 
  -5   1  -3  344.87   13.20 
  -5   1  -3  325.67   12.90 
  -5   1  -3  348.17   13.60 
   5  -1   3  328.77   12.10 
   5  -1   3  330.17   12.90 
   5  -1   3  341.67   12.50 
   5  -1   3  339.57   12.90 
   5  -1   3  324.77   13.60 
   5  -1   3  329.97   12.30 
   5  -1   3  347.37   12.50 
  -6   1  -3  106.59    5.40 
  -6   1  -3  102.09    4.60 
  -6   1  -3  108.79    5.50 
  -6   1  -3   98.89    5.20 
  -6   1  -3  102.19    5.80 
  -6   1  -3   99.09    5.20 
  -6   1  -3  102.59    5.70 
   6  -1   3  101.69    5.20 
   6  -1   3   98.69    5.20 
   6  -1   3   97.99    4.50 
   6  -1   3  106.69    4.80 
   6  -1   3  103.79    4.80 
  -7   1  -3  118.29    6.00 
  -7   1  -3  122.29    6.10 
  -7   1  -3  121.99    5.30 
  -7   1  -3  118.19    5.90 
  -7   1  -3  114.59    6.00 
   7  -1   3  117.79    5.30 
   7  -1   3  117.29    6.10 
   7  -1   3  120.09    5.40 
  -8   1  -3   83.59    4.70 
  -8   1  -3   81.99    4.50 
  -8   1  -3   87.49    4.60 
  -8   1  -3   79.39    3.90 
   8  -1   3   88.09    4.90 
   8  -1   3   87.39    4.20 
  -9   1  -3   25.10    2.00 
   9  -1   3   24.60    1.70 
   9  -1   3   30.20    2.40 
   8   0  -3  722.03   25.00 
   8   0  -3  756.52   25.20 
  -8   0   3  741.83   25.20 
  -8   0   3  698.63   25.40 
  -8   0   3  696.43   24.90 
  -8   0   3  732.53   25.10 
  -8   0   3  663.63   25.10 
   7   0  -3  226.78    8.80 
   7   0  -3  215.68    9.80 
   7   0  -3  217.08    9.80 
   7   0  -3  231.78    9.00 
  -7   0   3  222.48    9.00 
  -7   0   3  226.28    8.90 
  -7   0   3  217.68    9.20 
  -7   0   3  219.68    9.30 
   6   0  -3   99.29    4.70 
   6   0  -3   93.59    4.50 
   6   0  -3   95.09    5.40 
   6   0  -3   90.19    4.20 
   6   0  -3   86.99    6.20 
   6   0  -3   97.99    4.10 
  -6   0   3   98.09    5.00 
  -6   0   3  100.99    4.90 
  -6   0   3   98.59    4.70 
   5   0  -3  149.09    6.10 
   5   0  -3  150.38    7.80 
   5   0  -3  142.79    5.90 
   5   0  -3  148.79    5.90 
   5   0  -3  146.09    5.80 
   5   0  -3  151.08    5.70 
   5   0  -3  158.08    6.90 
  -5   0   3  149.99    6.90 
  -5   0   3  138.49    6.00 
  -5   0   3  139.09    6.10 
  -5   0   3  153.38    7.30 
  -5   0   3  147.39    6.50 
  -5   0   3  144.29    6.40 
  -5   0   3  150.88    7.00 
  -5   0   3  141.59    6.30 
   4   0  -3  573.94   20.90 
   4   0  -3  546.85   19.10 
   4   0  -3  545.15   19.00 
   4   0  -3  543.15   20.00 
   4   0  -3  561.34   19.90 
  -4   0   3  543.65   19.60 
  -4   0   3  558.34   20.00 
  -4   0   3  546.65   20.00 
  -4   0   3  537.75   23.10 
  -4   0   3  550.94   20.30 
   3   0  -3 1331.57   44.70 
   3   0  -3 1297.27   46.00 
   3   0  -3 1273.87   45.20 
   3   0  -3 1354.06   45.40 
  -3   0   3 1319.57   45.60 
  -3   0   3 1253.87   45.30 
  -3   0   3 1365.66   48.10 
  -3   0   3 1389.76   45.40 
  -3   0   3 1303.67   45.00 
  -3   0   3 1357.66   45.30 
   2   0  -3   99.39    3.60 
   2   0  -3   95.19    4.40 
   2   0  -3  100.69    4.10 
   2   0  -3   90.69    3.60 
  -2   0   3   96.19    4.30 
  -2   0   3   94.69    4.00 
  -2   0   3  101.19    5.60 
   1   0  -3 2393.26   83.79 
   1   0  -3 2539.85   84.09 
   1   0  -3 2619.04   84.69 
   1   0  -3 2329.07   83.89 
  -1   0   3 2641.64   87.39 
   0   0   3   81.19    3.40 
   0   0   3   81.89    4.20 
   0   0   3   81.89    3.30 
  -1   0  -3 8442.16  344.37 
  -1   0  -3 9188.08  309.67 
  -1   0  -3 8792.32  307.67 
   1   0   3 9444.36  308.77 
   1   0   3 9976.10  311.37 
  -2   0  -3  445.66   15.10 
  -2   0  -3  387.96   14.40 
  -2   0  -3  405.16   14.60 
  -2   0  -3  423.06   15.00 
   2   0   3  450.05   14.50 
   2   0   3  450.35   15.20 
   2   0   3  434.16   15.10 
   2   0   3  427.26   14.70 
  -3   0  -3 3227.18  107.79 
  -3   0  -3 3034.60  107.49 
  -3   0  -3 3296.77  107.89 
  -3   0  -3 2949.41  107.49 
   3   0   3 3338.17  107.89 
   3   0   3 3230.28  107.99 
   3   0   3 3292.77  108.29 
   3   0   3 3117.29  107.49 
   3   0   3 3358.46  107.09 
  -4   0  -3  668.23   22.90 
  -4   0  -3  581.14   22.40 
  -4   0  -3  635.34   22.40 
  -4   0  -3  665.03   22.80 
  -4   0  -3  590.24   21.80 
   4   0   3  616.54   22.20 
   4   0   3  669.23   23.10 
   4   0   3  652.53   22.60 
   4   0   3  666.33   21.80 
   4   0   3  640.24   22.40 
  -5   0  -3 1456.15   48.20 
  -5   0  -3 1367.36   47.80 
  -5   0  -3 1326.07   46.90 
  -5   0  -3 1427.06   47.70 
  -5   0  -3 1383.66   48.20 
   5   0   3 1361.86   46.90 
   5   0   3 1378.46   48.50 
   5   0   3 1384.66   47.70 
  -6   0  -3   56.29    3.70 
  -6   0  -3   59.39    3.80 
  -6   0  -3   66.99    3.80 
  -6   0  -3   60.89    4.00 
  -6   0  -3   70.49    3.90 
  -6   0  -3   62.29    4.10 
  -6   0  -3   62.79    3.20 
  -6   0  -3   62.29    4.20 
   6   0   3   58.49    3.00 
   6   0   3   59.79    3.70 
   6   0   3   59.59    3.60 
   6   0   3   61.29    4.30 
   6   0   3   59.09    3.10 
   6   0   3   60.19    3.20 
   6   0   3   52.19    2.90 
  -7   0  -3  422.16   15.90 
  -7   0  -3  425.66   15.90 
  -7   0  -3  437.66   15.90 
  -7   0  -3  397.16   16.40 
  -7   0  -3  406.76   15.70 
  -7   0  -3  423.06   15.10 
   7   0   3  387.16   14.80 
   7   0   3  386.56   16.90 
   7   0   3  408.76   15.90 
   7   0   3  422.46   15.20 
   7   0   3  421.86   15.90 
   7   0   3  402.06   15.10 
  -8   0  -3   68.09    3.40 
  -8   0  -3   75.39    4.30 
  -8   0  -3   58.19    4.00 
  -8   0  -3   63.19    3.90 
  -8   0  -3   63.69    4.10 
   8   0   3   62.89    3.50 
   8   0   3   65.99    3.60 
   8   0   3   53.79    3.90 
   8   0   3   64.59    4.20 
  -9   0  -3  115.99    5.40 
  -9   0  -3  114.39    5.40 
  -9   0  -3  103.19    4.60 
   9   0   3  119.99    5.00 
   9   0   3  115.89    5.60 
   8  -1  -3  103.19    4.60 
   8  -1  -3  104.79    5.10 
   8  -1  -3  111.39    4.70 
  -8   1   3  111.29    5.00 
  -8   1   3  110.19    4.80 
  -8   1   3  101.99    4.50 
  -8   1   3  109.09    4.70 
   7  -1  -3   41.10    2.70 
   7  -1  -3   39.30    3.50 
   7  -1  -3   43.50    2.80 
  -7   1   3   39.70    3.10 
  -7   1   3   38.50    2.70 
  -7   1   3   36.10    2.50 
  -7   1   3   39.70    3.00 
   6  -1  -3  362.96   16.00 
   6  -1  -3  378.06   13.70 
   6  -1  -3  371.36   14.90 
   6  -1  -3  372.26   13.80 
   6  -1  -3  359.46   13.10 
   6  -1  -3  372.96   14.80 
  -6   1   3  355.16   13.80 
  -6   1   3  374.66   14.20 
  -6   1   3  386.46   14.40 
  -6   1   3  357.16   13.70 
   5  -1  -3  960.50   32.40 
   5  -1  -3  901.01   32.20 
   5  -1  -3  936.71   32.40 
   5  -1  -3  957.80   32.10 
   5  -1  -3  986.70   33.50 
   5  -1  -3  936.71   31.90 
   5  -1  -3  956.00   34.70 
  -5   1   3  910.91   32.70 
  -5   1   3  924.01   32.40 
  -5   1   3  978.30   34.00 
  -5   1   3  966.00   33.00 
  -5   1   3  809.52   33.50 
  -5   1   3  917.31   33.70 
   4  -1  -3  418.76   16.50 
   4  -1  -3  467.45   15.70 
   4  -1  -3  421.46   15.90 
   4  -1  -3  445.46   15.60 
   4  -1  -3  467.05   16.70 
   4  -1  -3  459.15   15.80 
   4  -1  -3  467.25   17.70 
  -4   1   3  420.56   15.90 
  -4   1   3  466.75   17.20 
  -4   1   3  431.86   16.40 
  -4   1   3  461.15   16.80 
  -4   1   3  421.16   16.10 
  -4   1   3  430.96   16.30 
  -4   1   3  486.75   22.10 
  -4   1   3  437.26   16.90 
   3  -1  -3  812.52   27.60 
   3  -1  -3  792.82   28.40 
   3  -1  -3  839.82   29.30 
   3  -1  -3  835.42   27.80 
   3  -1  -3  812.82   28.40 
  -3   1   3  832.62   28.80 
  -3   1   3  819.62   28.30 
  -3   1   3  832.82   31.40 
  -3   1   3  743.43   27.90 
  -3   1   3  815.12   28.30 
   2  -1  -3  773.62   27.60 
   2  -1  -3  838.42   28.40 
   2  -1  -3  847.62   29.00 
   2  -1  -3  853.51   27.90 
  -2   1   3  808.52   28.10 
  -2   1   3  808.02   28.60 
  -2   1   3  854.01   30.50 
  -2   1   3  825.12   28.20 
  -2   1   3  826.72   32.50 
  -2   1   3  789.82   28.60 
   1  -1  -3  448.96   16.50 
   1  -1  -3  482.25   16.40 
   1  -1  -3  479.45   16.50 
   1  -1  -3  507.95   16.90 
  -1   1   3  446.96   16.60 
  -1   1   3  497.35   18.20 
  -1   1   3  533.15   21.40 
   0  -1  -3 5167.88  173.58 
   0  -1  -3 4814.32  174.18 
   0   1   3 5417.56  179.18 
   0   1   3 5304.67  175.28 
  -1  -1  -3  722.13   25.10 
  -1  -1  -3  724.73   25.70 
   1   1   3  777.62   25.30 
  -2  -1  -3 1442.96   50.49 
  -2  -1  -3 1539.75   50.49 
   2   1   3 1487.95   50.49 
   2   1   3 1458.85   50.69 
   2   1   3 1518.15   50.19 
   2   1   3 1540.55   50.69 
  -3  -1  -3 1074.69   37.80 
  -3  -1  -3 1102.89   38.00 
  -3  -1  -3 1138.69   38.10 
   3   1   3 1167.68   37.70 
   3   1   3 1140.49   38.10 
   3   1   3 1056.79   37.80 
   3   1   3 1095.69   38.30 
   3   1   3 1130.69   37.50 
  -4  -1  -3  945.91   33.30 
  -4  -1  -3 1005.00   33.70 
  -4  -1  -3  872.61   33.20 
  -4  -1  -3  974.30   33.70 
   4   1   3 1020.80   32.90 
   4   1   3 1013.50   34.10 
   4   1   3  956.90   33.40 
   4   1   3  979.10   33.20 
  -5  -1  -3  295.57   11.30 
  -5  -1  -3  309.67   12.70 
  -5  -1  -3  264.67   10.20 
  -5  -1  -3  294.47   10.90 
  -5  -1  -3  293.57   11.40 
   5   1   3  269.97   10.60 
   5   1   3  287.57   10.30 
   5   1   3  289.87   11.00 
   5   1   3  279.07   11.70 
  -6  -1  -3  192.98    8.70 
  -6  -1  -3  186.68    8.10 
  -6  -1  -3  184.38    8.10 
  -6  -1  -3  199.98    7.60 
  -6  -1  -3  186.08    7.60 
  -6  -1  -3  208.58    8.30 
  -6  -1  -3  207.18    8.80 
  -6  -1  -3  194.58    8.20 
   6   1   3  194.88    7.40 
   6   1   3  184.58    7.40 
   6   1   3  199.68    7.70 
   6   1   3  186.48    7.50 
   6   1   3  188.68    8.00 
   6   1   3  203.78    9.20 
   6   1   3  198.58    8.30 
  -7  -1  -3   15.00    2.20 
  -7  -1  -3   15.70    2.20 
  -7  -1  -3   13.20    1.60 
  -7  -1  -3   12.10    2.10 
  -7  -1  -3   16.30    2.20 
  -7  -1  -3   10.40    2.00 
   7   1   3    9.10    2.20 
   7   1   3   16.60    2.30 
   7   1   3   16.30    2.40 
   7   1   3   15.60    1.80 
   7   1   3   15.10    1.60 
   7   1   3   13.40    1.70 
  -8  -1  -3   94.59    4.30 
  -8  -1  -3   82.89    4.90 
  -8  -1  -3   89.19    5.00 
  -8  -1  -3   82.99    4.90 
  -8  -1  -3   85.69    4.70 
   8   1   3   94.79    5.10 
   8   1   3   88.09    4.10 
   8   1   3   86.99    4.40 
   8   1   3   84.49    4.30 
   8   1   3   86.09    5.10 
  -9  -1  -3   68.29    3.40 
  -9  -1  -3   75.29    4.30 
  -9  -1  -3   75.09    4.30 
   9   1   3   68.49    3.60 
   9   1   3   71.59    4.30 
   9   1   3   71.09    3.70 
 -10  -1  -3   91.49    3.90 
  10   1   3   67.59    4.30 
   7  -2  -3   71.29    3.50 
   7  -2  -3   56.79    3.30 
   7  -2  -3   64.19    4.10 
  -7   2   3   68.29    3.80 
  -7   2   3   71.29    3.80 
   6  -2  -3  128.39    5.70 
   6  -2  -3  127.29    6.50 
   6  -2  -3  127.29    5.70 
   6  -2  -3  130.99    6.80 
  -6   2   3  137.89    6.10 
  -6   2   3  122.69    5.90 
  -6   2   3  121.29    6.90 
  -6   2   3  133.99    5.70 
  -6   2   3  134.09    6.30 
  -6   2   3  120.49    5.50 
   5  -2  -3  589.64   20.10 
   5  -2  -3  598.84   21.70 
   5  -2  -3  594.64   20.70 
   5  -2  -3  603.14   21.90 
   5  -2  -3  568.64   20.60 
   5  -2  -3  587.64   23.00 
  -5   2   3  567.94   20.70 
  -5   2   3  564.64   22.20 
  -5   2   3  563.04   21.00 
  -5   2   3  568.14   20.60 
  -5   2   3  593.14   21.10 
  -5   2   3  573.54   22.30 
  -5   2   3  539.55   21.00 
  -5   2   3  593.24   21.30 
   4  -2  -3  213.18    8.00 
   4  -2  -3  215.68    8.20 
   4  -2  -3  228.58    9.10 
   4  -2  -3  221.38   10.10 
   4  -2  -3  214.98    7.80 
   4  -2  -3  200.98    8.10 
   4  -2  -3  212.38    8.10 
  -4   2   3  212.48    8.70 
  -4   2   3  204.38    8.50 
  -4   2   3  211.08    8.70 
  -4   2   3  220.58    9.50 
  -4   2   3  204.78    8.20 
  -4   2   3  198.38    8.50 
  -4   2   3  213.28    8.20 
  -4   2   3  216.68    9.50 
   3  -2  -3  398.26   15.20 
   3  -2  -3  396.26   14.30 
   3  -2  -3  389.76   13.50 
   3  -2  -3  351.06   14.00 
   3  -2  -3  365.36   13.40 
  -3   2   3  382.36   14.60 
  -3   2   3  374.16   17.20 
  -3   2   3  399.06   19.90 
   2  -2  -3  157.08    5.70 
   2  -2  -3  149.88    5.50 
   2  -2  -3  157.28    6.80 
   2  -2  -3  155.18    6.20 
   2  -2  -3  154.28    5.80 
  -2   2   3  156.78   10.10 
  -2   2   3  135.19    6.20 
  -2   2   3  149.49    6.50 
  -2   2   3  162.28    8.30 
   1  -2  -3 1391.46   50.09 
   1  -2  -3 1538.35   49.90 
   1  -2  -3 1518.65   49.90 
  -1   2   3 1563.34   51.99 
  -1   2   3 1425.26   49.90 
  -1   2   3 1472.75   50.69 
  -1   2   3 1482.05   54.29 
  -1   2   3 1544.15   51.09 
  -1   2   3 1450.05   50.49 
   0  -2  -3    3.10    0.70 
   0   2   3    1.00    0.80 
   0   2   3    1.10    0.60 
  -1  -2  -3 3752.52  135.29 
  -1  -2  -3 3990.50  137.29 
  -1  -2  -3 4111.69  136.19 
   1   2   3 4148.08  136.59 
   1   2   3 3929.91  137.49 
   1   2   3 4150.68  137.29 
   1   2   3 4200.88  137.89 
  -2  -2  -3 1399.06   50.09 
  -2  -2  -3 1582.84   49.99 
  -2  -2  -3 1518.65   50.09 
  -2  -2  -3 1460.05   50.49 
   2   2   3 1546.55   50.39 
   2   2   3 1454.65   50.59 
   2   2   3 1471.85   49.90 
  -3  -2  -3 1294.37   42.40 
  -3  -2  -3 1248.78   42.30 
  -3  -2  -3 1279.67   41.90 
   3   2   3 1213.88   42.70 
   3   2   3 1313.57   42.30 
   3   2   3 1179.68   42.20 
   3   2   3 1263.77   41.90 
   3   2   3 1171.68   41.60 
  -4  -2  -3   55.49    3.10 
  -4  -2  -3   54.39    2.30 
  -4  -2  -3   54.89    3.00 
  -4  -2  -3   50.39    2.70 
   4   2   3   55.39    3.20 
   4   2   3   55.59    2.80 
   4   2   3   57.09    3.40 
   4   2   3   55.69    2.40 
   4   2   3   55.39    2.90 
  -5  -2  -3  471.75   17.00 
  -5  -2  -3  477.85   17.40 
  -5  -2  -3  439.46   16.30 
  -5  -2  -3  480.45   17.40 
   5   2   3  484.85   17.20 
   5   2   3  481.45   16.50 
   5   2   3  462.35   17.00 
   5   2   3  482.05   17.90 
  -6  -2  -3  526.85   19.40 
  -6  -2  -3  562.94   19.90 
  -6  -2  -3  559.04   19.40 
  -6  -2  -3  518.25   18.90 
  -6  -2  -3  518.45   18.80 
  -6  -2  -3  550.94   20.00 
   6   2   3  546.75   20.50 
   6   2   3  550.64   19.60 
   6   2   3  516.15   18.80 
   6   2   3  511.75   19.10 
   6   2   3  496.05   19.20 
   6   2   3  518.25   18.60 
  -7  -2  -3  747.03   28.60 
  -7  -2  -3  754.52   27.70 
  -7  -2  -3  766.92   26.40 
  -7  -2  -3  714.13   26.40 
  -7  -2  -3  769.52   27.10 
  -7  -2  -3  737.33   27.10 
  -7  -2  -3  776.22   27.20 
   7   2   3  754.72   26.40 
   7   2   3  675.43   26.80 
   7   2   3  779.12   28.70 
   7   2   3  764.52   26.20 
   7   2   3  755.12   26.90 
   7   2   3  741.93   26.30 
   7   2   3  781.52   27.40 
  -8  -2  -3  242.48   10.20 
  -8  -2  -3  239.28    9.50 
  -8  -2  -3  243.98    9.40 
  -8  -2  -3  244.28   10.20 
  -8  -2  -3  244.18   10.30 
  -8  -2  -3  231.78   10.80 
   8   2   3  241.68   10.50 
   8   2   3  261.27   10.30 
   8   2   3  241.68    9.50 
   8   2   3  238.28    9.40 
   8   2   3  233.48    9.20 
   8   2   3  226.68   11.50 
  -9  -2  -3   99.39    4.50 
  -9  -2  -3   97.69    5.10 
  -9  -2  -3   94.49    4.30 
  -9  -2  -3   99.99    5.20 
   9   2   3   93.29    4.50 
   9   2   3   91.49    4.30 
   9   2   3   93.69    5.10 
   9   2   3   94.49    4.60 
 -10  -2  -3    6.60    1.50 
 -10  -2  -3    8.80    1.50 
  10   2   3    6.80    1.50 
  10   2   3    7.90    1.20 
  10   2   3    6.40    1.10 
   7  -3  -3   50.89    3.40 
   7  -3  -3   50.29    2.60 
   7  -3  -3   52.19    2.80 
  -7   3   3   55.79    3.00 
  -7   3   3   52.19    3.10 
  -7   3   3   57.39    3.10 
   6  -3  -3  105.99    5.80 
   6  -3  -3  100.59    4.70 
  -6   3   3  110.59    5.30 
  -6   3   3  107.79    5.30 
  -6   3   3   95.79    5.00 
   5  -3  -3 1320.97   45.90 
   5  -3  -3 1287.17   45.50 
   5  -3  -3 1348.27   44.70 
   5  -3  -3 1233.58   44.50 
  -5   3   3 1325.77   45.20 
  -5   3   3 1275.87   45.10 
  -5   3   3 1322.37   45.10 
  -5   3   3 1256.77   46.40 
   4  -3  -3  306.27   11.00 
   4  -3  -3  305.27   13.40 
   4  -3  -3  314.57   11.60 
   4  -3  -3  316.17   12.40 
   4  -3  -3  315.97   12.70 
   4  -3  -3  294.17   11.40 
  -4   3   3  312.07   13.30 
  -4   3   3  300.27   12.00 
  -4   3   3  308.77   13.00 
  -4   3   3  300.97   11.90 
  -4   3   3  303.37   12.00 
   3  -3  -3  342.37   12.50 
   3  -3  -3  345.57   13.80 
   3  -3  -3  347.27   12.90 
   3  -3  -3  320.57   12.90 
   3  -3  -3  369.56   14.60 
   3  -3  -3  352.66   12.70 
   3  -3  -3  352.86   12.70 
   3  -3  -3  361.36   13.60 
  -3   3   3  346.97   13.20 
  -3   3   3  355.26   14.10 
  -3   3   3  343.47   13.30 
  -3   3   3  368.86   20.00 
  -3   3   3  362.96   14.40 
  -3   3   3  340.17   13.20 
  -3   3   3  355.86   13.50 
  -3   3   3  418.96   13.40 
   2  -3  -3  187.68    6.70 
   2  -3  -3  168.48    7.20 
   2  -3  -3  173.58    6.60 
   2  -3  -3  190.28    8.20 
   2  -3  -3  167.48    7.00 
  -2   3   3  185.58   12.00 
  -2   3   3  185.48    7.70 
  -2   3   3  186.48    8.00 
  -2   3   3  180.28    9.60 
   1  -3  -3  313.37   11.90 
   1  -3  -3  348.97   12.70 
   1  -3  -3  334.27   11.50 
   1  -3  -3  323.37   11.50 
   1  -3  -3  304.77   12.30 
  -1   3   3  339.17   13.70 
  -1   3   3  330.57   12.50 
  -1   3   3  328.37   12.80 
  -1   3   3  344.97   16.60 
  -1   3   3  321.87   12.30 
   0  -3  -3  433.56   16.80 
   0  -3  -3  474.05   16.50 
   0  -3  -3  482.45   16.10 
   0   3   3  460.75   17.30 
   0   3   3  436.76   16.50 
   0   3   3  496.75   20.80 
   0   3   3  489.85   17.20 
   0   3   3  476.25   16.50 
   0   3   3  491.55   16.50 
   0   3   3  452.75   16.90 
  -1  -3  -3  294.07   11.40 
  -1  -3  -3  302.17   11.00 
  -1  -3  -3  313.27   10.70 
   1   3   3  306.37   10.80 
   1   3   3  310.07   11.10 
   1   3   3  319.37   10.90 
   1   3   3  305.07   11.40 
  -2  -3  -3  664.33   23.20 
  -2  -3  -3  661.33   24.00 
  -2  -3  -3  633.84   23.20 
  -2  -3  -3  710.23   23.30 
  -2  -3  -3  683.93   23.60 
   2   3   3  704.13   23.30 
   2   3   3  675.83   23.80 
   2   3   3  677.63   23.50 
   2   3   3  749.13   23.80 
  -3  -3  -3  302.77   10.80 
  -3  -3  -3  301.77   10.80 
  -3  -3  -3  286.27   10.70 
  -3  -3  -3  298.77   10.60 
  -3  -3  -3  310.67   10.50 
   3   3   3  305.27   10.50 
   3   3   3  293.77   10.80 
   3   3   3  304.47   11.30 
   3   3   3  296.17   10.80 
  -4  -3  -3 1244.08   43.70 
  -4  -3  -3 1265.97   43.10 
  -4  -3  -3 1216.68   42.70 
  -4  -3  -3 1234.18   42.80 
  -4  -3  -3 1282.57   43.10 
  -4  -3  -3 1292.07   42.40 
   4   3   3 1277.47   43.60 
   4   3   3 1200.38   42.90 
   4   3   3 1300.47   42.40 
   4   3   3 1266.67   43.00 
  -5  -3  -3  474.45   18.30 
  -5  -3  -3  487.15   17.90 
  -5  -3  -3  542.65   19.00 
  -5  -3  -3  534.75   18.60 
  -5  -3  -3  534.25   19.10 
   5   3   3  537.25   18.10 
   5   3   3  531.95   19.60 
   5   3   3  522.05   18.80 
   5   3   3  540.65   18.90 
  -6  -3  -3  516.75   19.20 
  -6  -3  -3  520.15   19.60 
  -6  -3  -3  544.25   20.10 
  -6  -3  -3  559.14   19.60 
  -6  -3  -3  568.44   20.10 
  -6  -3  -3  519.75   19.00 
   6   3   3  558.54   20.80 
   6   3   3  564.24   19.80 
   6   3   3  500.15   19.60 
   6   3   3  557.34   18.90 
   6   3   3  520.55   19.00 
  -7  -3  -3  230.48    9.60 
  -7  -3  -3  227.78    9.10 
  -7  -3  -3  227.88    9.50 
  -7  -3  -3  241.58   10.20 
  -7  -3  -3  240.78    9.60 
  -7  -3  -3  223.98   10.20 
  -7  -3  -3  229.88    8.90 
   7   3   3  241.78   11.00 
   7   3   3  213.38    8.70 
   7   3   3  232.38    8.90 
   7   3   3  245.48    9.90 
   7   3   3  230.88    9.00 
   7   3   3  229.98    9.40 
   7   3   3  213.48    8.70 
   7   3   3  214.08    8.60 
  -8  -3  -3  529.25   19.70 
  -8  -3  -3  530.25   19.60 
  -8  -3  -3  510.95   20.30 
  -8  -3  -3  521.85   19.10 
  -8  -3  -3  538.05   19.70 
  -8  -3  -3  526.35   18.90 
   8   3   3  510.65   18.70 
   8   3   3  514.65   18.60 
   8   3   3  499.85   21.10 
   8   3   3  524.25   19.50 
   8   3   3  537.85   19.00 
   8   3   3  534.15   20.00 
  -9  -3  -3   23.90    2.00 
  -9  -3  -3   23.90    2.60 
  -9  -3  -3   24.30    2.40 
  -9  -3  -3   24.30    2.50 
  -9  -3  -3   26.80    2.80 
   9   3   3   26.10    2.30 
   9   3   3   22.60    2.70 
   9   3   3   22.20    2.70 
   9   3   3   20.80    2.00 
   9   3   3   21.30    2.00 
 -10  -3  -3    9.20    1.30 
 -10  -3  -3   11.60    1.90 
 -10  -3  -3   10.50    1.70 
  10   3   3    6.80    1.30 
  10   3   3    7.90    1.70 
  10   3   3    9.40    1.30 
   6  -4  -3   51.99    3.70 
   6  -4  -3   56.29    3.00 
  -6   4   3   57.69    3.30 
  -6   4   3   50.89    3.20 
  -6   4   3   61.29    3.50 
  -6   4   3   50.99    3.20 
   5  -4  -3  106.49    4.80 
   5  -4  -3   96.09    5.70 
  -5   4   3   99.19    5.20 
  -5   4   3   98.39    5.10 
  -5   4   3   97.39    6.00 
  -5   4   3   96.29    6.10 
  -5   4   3   99.79    5.10 
   4  -4  -3  133.49    6.50 
   4  -4  -3  150.28    7.40 
   4  -4  -3  134.99    6.70 
  -4   4   3  146.79    7.60 
  -4   4   3  147.59    6.60 
  -4   4   3  144.99    6.60 
  -4   4   3  143.79    6.70 
  -4   4   3  143.89    7.80 
   3  -4  -3  700.03   25.20 
   3  -4  -3  665.83   24.60 
   3  -4  -3  655.73   25.60 
   3  -4  -3  654.33   23.80 
  -3   4   3  693.13   24.50 
  -3   4   3  708.73   25.60 
  -3   4   3  663.73   24.40 
  -3   4   3  673.83   24.60 
  -3   4   3  729.53   26.10 
  -3   4   3  695.83   33.00 
   2  -4  -3   30.20    1.80 
   2  -4  -3   34.80    3.00 
   2  -4  -3   32.80    2.30 
   2  -4  -3   32.80    2.40 
   2  -4  -3   32.00    2.70 
   2  -4  -3   33.40    2.00 
   2  -4  -3   30.80    1.80 
   2  -4  -3   34.30    3.60 
  -2   4   3   32.60    2.30 
  -2   4   3   33.10    3.30 
  -2   4   3   32.40    2.90 
  -2   4   3   36.00    6.50 
  -2   4   3   32.70    2.30 
  -2   4   3   33.20    2.40 
  -2   4   3   34.30    2.50 
  -2   4   3   32.60    3.00 
   1  -4  -3  454.65   15.70 
   1  -4  -3  462.75   17.10 
   1  -4  -3  444.76   17.00 
   1  -4  -3  444.66   15.80 
   1  -4  -3  462.25   16.40 
   1  -4  -3  447.46   15.80 
   1  -4  -3  426.96   16.30 
  -1   4   3  453.15   17.50 
  -1   4   3  460.65   17.20 
  -1   4   3  479.15   22.60 
  -1   4   3  454.55   16.80 
   0  -4  -3  259.27   10.30 
   0  -4  -3  269.57    9.80 
   0  -4  -3  261.57    9.10 
   0  -4  -3  265.67    9.30 
   0  -4  -3  253.77    9.20 
   0   4   3  260.87   10.30 
   0   4   3  259.87    9.70 
   0   4   3  262.27   10.60 
   0   4   3  234.48   14.20 
   0   4   3  260.77    9.60 
   0   4   3  253.27    9.90 
  -1  -4  -3 2841.82   98.99 
  -1  -4  -3 3014.70   97.99 
  -1  -4  -3 2984.80   98.49 
   1   4   3 2800.62   98.69 
   1   4   3 3057.69   98.39 
   1   4   3 2635.64   98.29 
   1   4   3 3092.79   99.29 
   1   4   3 2974.10   98.39 
  -2  -4  -3  644.94   22.40 
  -2  -4  -3  657.63   22.00 
  -2  -4  -3  617.14   22.90 
   2   4   3  651.03   22.20 
   2   4   3  640.14   22.50 
   2   4   3  629.64   22.50 
   2   4   3  643.84   22.80 
  -3  -4  -3 1799.22   64.79 
  -3  -4  -3 1995.40   64.79 
  -3  -4  -3 2005.30   65.29 
  -3  -4  -3 1889.91   65.69 
   3   4   3 1869.21   65.09 
   3   4   3 1954.20   64.89 
   3   4   3 1928.41   65.49 
   3   4   3 1971.50   65.49 
  -4  -4  -3  393.26   14.00 
  -4  -4  -3  355.46   13.60 
  -4  -4  -3  383.16   14.40 
  -4  -4  -3  393.46   13.90 
  -4  -4  -3  396.56   13.40 
  -4  -4  -3  378.06   13.90 
   4   4   3  396.76   14.10 
   4   4   3  386.16   13.90 
   4   4   3  363.86   14.00 
   4   4   3  370.96   13.50 
   4   4   3  401.26   14.60 
  -5  -4  -3  131.69    6.30 
  -5  -4  -3  153.58    6.40 
  -5  -4  -3  142.69    5.50 
  -5  -4  -3  134.99    5.90 
  -5  -4  -3  138.79    5.90 
  -5  -4  -3  141.99    6.30 
   5   4   3  154.58    6.30 
   5   4   3  153.28    7.00 
   5   4   3  151.08    5.60 
   5   4   3  151.68    6.40 
  -6  -4  -3   39.50    3.10 
  -6  -4  -3   39.00    3.00 
  -6  -4  -3   33.30    3.70 
  -6  -4  -3   34.10    2.50 
  -6  -4  -3   38.90    2.30 
  -6  -4  -3   43.20    2.70 
   6   4   3   34.30    2.50 
   6   4   3   42.10    3.50 
   6   4   3   36.70    2.30 
   6   4   3   40.20    2.20 
   6   4   3   41.90    2.90 
   6   4   3   39.80    2.10 
   6   4   3   40.40    2.40 
  -7  -4  -3  148.99    6.70 
  -7  -4  -3  143.99    6.60 
  -7  -4  -3  141.99    6.30 
  -7  -4  -3  134.99    7.10 
  -7  -4  -3  141.09    6.00 
  -7  -4  -3  136.59    6.60 
  -7  -4  -3  150.58    7.20 
   7   4   3  139.09    6.00 
   7   4   3  149.88    7.80 
   7   4   3  139.59    6.40 
   7   4   3  141.79    6.00 
   7   4   3  143.89    5.70 
   7   4   3  134.79    5.80 
   7   4   3  141.79    5.80 
   7   4   3  144.19    6.80 
  -8  -4  -3  890.21   32.30 
  -8  -4  -3  907.31   31.80 
  -8  -4  -3  872.61   32.90 
  -8  -4  -3  908.61   32.30 
  -8  -4  -3  894.41   32.00 
  -8  -4  -3  913.41   31.40 
   8   4   3  903.11   31.20 
   8   4   3  922.81   31.60 
   8   4   3  887.41   32.00 
   8   4   3  944.91   32.70 
   8   4   3  881.91   31.40 
   8   4   3  879.51   33.80 
  -9  -4  -3  234.78    9.30 
  -9  -4  -3  239.18   10.00 
  -9  -4  -3  236.18   10.20 
  -9  -4  -3  260.27    9.90 
  -9  -4  -3  237.68   10.20 
   9   4   3  255.97    9.70 
   9   4   3  239.68    9.30 
   9   4   3  252.17   10.20 
   9   4   3  234.98   10.50 
 -10  -4  -3   82.19    4.30 
 -10  -4  -3   89.59    4.20 
 -10  -4  -3   84.89    4.60 
  10   4   3   82.69    4.60 
  10   4   3   84.59    4.10 
   6  -5  -3    2.20    1.30 
   5  -5  -3   23.10    2.80 
   5  -5  -3   24.10    2.00 
  -5   5   3   22.00    2.10 
  -5   5   3   23.90    2.40 
  -5   5   3   25.60    2.40 
  -5   5   3   24.40    2.30 
   4  -5  -3   88.39    5.30 
   4  -5  -3   70.89    4.90 
   4  -5  -3   83.99    4.50 
   4  -5  -3   84.79    4.30 
  -4   5   3   84.49    5.40 
  -4   5   3   86.69    4.50 
  -4   5   3   87.19    5.80 
  -4   5   3   91.79    4.80 
  -4   5   3   86.09    4.70 
  -4   5   3   85.19    4.60 
   3  -5  -3  226.78    9.40 
   3  -5  -3  236.78    9.30 
   3  -5  -3  234.58    9.60 
   3  -5  -3  243.38   10.40 
  -3   5   3  234.98   10.70 
  -3   5   3  228.68    9.50 
  -3   5   3  251.17    9.80 
  -3   5   3  225.58   17.20 
  -3   5   3  231.38    9.80 
  -3   5   3  241.48   11.20 
  -3   5   3  222.38    9.00 
   2  -5  -3  237.38   10.00 
   2  -5  -3  223.18    8.50 
   2  -5  -3  233.08    9.50 
   2  -5  -3  235.28    9.30 
   2  -5  -3  238.58    9.10 
  -2   5   3  223.78    9.20 
  -2   5   3  246.98   16.90 
  -2   5   3  227.88    9.40 
  -2   5   3  238.28   10.70 
  -2   5   3  222.58   10.80 
  -2   5   3  234.58   10.20 
  -2   5   3  226.88    9.50 
  -2   5   3  225.98    8.90 
   1  -5  -3  261.97    9.70 
   1  -5  -3  274.67   11.50 
   1  -5  -3  284.27   10.30 
   1  -5  -3  264.37   10.50 
   1  -5  -3  273.17   10.70 
   1  -5  -3  264.97   10.20 
   1  -5  -3  271.67   10.00 
   1  -5  -3  263.07   10.90 
  -1   5   3  274.77   11.10 
  -1   5   3  282.47   11.60 
  -1   5   3  256.47   10.40 
  -1   5   3  263.97   10.50 
  -1   5   3  279.77   17.30 
  -1   5   3  260.07   10.10 
  -1   5   3  281.57   12.00 
   0  -5  -3 2263.47   74.39 
   0  -5  -3 2117.09   74.69 
   0  -5  -3 2022.40   73.29 
   0  -5  -3 2201.38   73.69 
   0  -5  -3 2253.17   75.19 
   0  -5  -3 1978.60   73.49 
   0   5   3 2267.17   75.59 
   0   5   3 2403.86   83.19 
   0   5   3 2110.29   74.49 
   0   5   3 2229.98   74.99 
   0   5   3 2206.58   74.29 
  -1  -5  -3   83.69    3.60 
  -1  -5  -3   77.79    3.40 
  -1  -5  -3   83.19    4.10 
  -1  -5  -3   82.59    4.60 
   1   5   3   81.39    3.80 
   1   5   3   83.99    4.00 
   1   5   3   78.49    4.20 
   1   5   3   92.39    4.90 
   1   5   3   75.29    8.20 
   1   5   3   80.69    4.00 
  -2  -5  -3 1062.19   38.20 
  -2  -5  -3 1121.49   37.00 
  -2  -5  -3 1013.50   37.00 
  -2  -5  -3 1129.19   37.60 
   2   5   3 1117.19   38.30 
   2   5   3 1074.99   37.50 
   2   5   3 1067.19   37.70 
   2   5   3 1111.69   37.40 
  -3  -5  -3  699.73   24.50 
  -3  -5  -3  733.93   25.20 
  -3  -5  -3  699.43   25.70 
   3   5   3  728.53   25.70 
   3   5   3  727.73   24.90 
   3   5   3  699.73   25.30 
  -4  -5  -3  430.86   15.60 
  -4  -5  -3  444.56   15.10 
  -4  -5  -3  424.16   16.20 
   4   5   3  441.06   16.10 
   4   5   3  424.06   16.00 
   4   5   3  429.96   15.30 
   4   5   3  408.96   15.40 
  -5  -5  -3  217.78    9.30 
  -5  -5  -3  223.18    8.60 
  -5  -5  -3  225.68    9.00 
  -5  -5  -3  221.88    8.80 
  -5  -5  -3  216.98    8.20 
   5   5   3  238.88    9.70 
   5   5   3  231.28    9.00 
  -6  -5  -3  337.27   12.90 
  -6  -5  -3  330.77   12.40 
  -6  -5  -3  325.47   12.10 
  -6  -5  -3  321.87   12.30 
  -6  -5  -3  306.37   12.60 
  -6  -5  -3  315.07   12.20 
   6   5   3  331.27   11.80 
   6   5   3  335.27   12.70 
   6   5   3  322.77   11.90 
   6   5   3  332.67   11.80 
   6   5   3  323.97   13.50 
   6   5   3  326.37   12.10 
  -7  -5  -3   41.90    3.20 
  -7  -5  -3   39.60    3.00 
  -7  -5  -3   39.50    3.40 
  -7  -5  -3   47.60    2.80 
  -7  -5  -3   42.70    3.10 
  -7  -5  -3   37.90    2.70 
  -7  -5  -3   42.60    3.40 
  -7  -5  -3   39.60    2.90 
   7   5   3   43.20    2.70 
   7   5   3   43.80    4.10 
   7   5   3   45.30    2.50 
   7   5   3   42.00    2.70 
   7   5   3   40.70    3.00 
   7   5   3   45.40    2.40 
   7   5   3   46.90    3.40 
  -8  -5  -3   86.59    4.90 
  -8  -5  -3   86.79    5.00 
  -8  -5  -3   85.89    4.20 
  -8  -5  -3   84.39    4.50 
  -8  -5  -3   82.09    5.20 
  -8  -5  -3   83.49    4.60 
   8   5   3   78.19    5.70 
   8   5   3   85.89    4.30 
   8   5   3   81.59    4.90 
   8   5   3   85.19    4.00 
   8   5   3   82.99    4.20 
   8   5   3   81.99    4.70 
  -9  -5  -3   64.39    3.80 
  -9  -5  -3   63.89    3.90 
  -9  -5  -3   67.69    3.50 
  -9  -5  -3   67.29    4.20 
  -9  -5  -3   69.29    4.40 
   9   5   3   70.19    3.50 
   9   5   3   62.49    4.40 
   9   5   3   63.89    3.60 
   9   5   3   70.29    4.30 
   9   5   3   73.09    3.90 
 -10  -5  -3   17.70    1.90 
 -10  -5  -3   12.00    1.90 
 -10  -5  -3   12.30    1.90 
  10   5   3   14.20    2.00 
  10   5   3   15.90    1.80 
  10   5   3   15.00    1.50 
   5  -6  -3   35.00    2.60 
   5  -6  -3   29.90    2.00 
  -5   6   3   37.80    2.30 
  -5   6   3   39.90    2.50 
   4  -6  -3  305.27   12.10 
   4  -6  -3  298.97   11.10 
   4  -6  -3  281.07   11.20 
  -4   6   3  304.57   11.40 
  -4   6   3  282.57   11.10 
  -4   6   3  299.77   11.60 
   3  -6  -3  160.08    7.70 
   3  -6  -3  155.78    6.70 
   3  -6  -3  164.78    6.70 
   3  -6  -3  148.79    6.80 
  -3   6   3  147.19   13.70 
  -3   6   3  157.78    8.40 
  -3   6   3  147.89    6.70 
  -3   6   3  143.89    6.30 
  -3   6   3  155.58    7.10 
  -3   6   3  151.78    7.90 
  -3   6   3  161.88    7.10 
   2  -6  -3  125.29    6.00 
   2  -6  -3  121.09    5.50 
   2  -6  -3  117.99    5.60 
   2  -6  -3  119.19    6.30 
   2  -6  -3  120.29    6.00 
  -2   6   3  117.59    5.40 
  -2   6   3  114.29   12.50 
  -2   6   3  117.79    5.80 
  -2   6   3  118.69    6.60 
  -2   6   3  117.69    5.90 
  -2   6   3  121.39    7.00 
   1  -6  -3   39.20    2.80 
   1  -6  -3   38.00    3.10 
   1  -6  -3   36.20    3.10 
   1  -6  -3   39.60    3.70 
   1  -6  -3   36.70    3.00 
   1  -6  -3   38.80    2.60 
   1  -6  -3   35.00    3.10 
  -1   6   3   36.70    3.80 
  -1   6   3   36.70    2.50 
  -1   6   3   37.30    2.80 
  -1   6   3   38.80    7.40 
  -1   6   3   39.20    2.90 
  -1   6   3   37.40    3.40 
  -1   6   3   43.50    3.90 
   0  -6  -3   34.30    2.70 
   0  -6  -3   34.70    3.30 
   0  -6  -3   32.30    2.70 
   0  -6  -3   30.60    1.90 
   0  -6  -3   34.10    2.50 
   0  -6  -3   31.20    2.60 
   0  -6  -3   30.40    2.10 
   0  -6  -3   32.70    2.20 
   0  -6  -3   33.90    2.60 
   0   6   3   35.40    2.50 
   0   6   3   36.30    3.50 
   0   6   3   34.40    3.20 
   0   6   3   30.70    2.20 
   0   6   3   32.50    2.40 
   0   6   3   36.80    2.70 
   0   6   3   29.60    2.70 
   0   6   3   38.20    7.20 
   0   6   3   31.00    1.90 
  -1  -6  -3  296.77   11.70 
  -1  -6  -3  293.67   10.80 
  -1  -6  -3  319.47   12.70 
  -1  -6  -3  303.17   11.30 
  -1  -6  -3  306.27   11.10 
  -1  -6  -3  312.57   11.90 
  -1  -6  -3  294.77   11.50 
  -1  -6  -3  298.77   11.20 
   1   6   3  306.27   12.20 
   1   6   3  287.77   11.70 
   1   6   3  313.67   12.90 
   1   6   3  282.57   11.40 
   1   6   3  292.07   11.10 
   1   6   3  299.47   11.60 
   1   6   3  299.27   11.40 
   1   6   3  292.67   11.30 
  -2  -6  -3  230.28   10.20 
  -2  -6  -3  230.98    8.80 
  -2  -6  -3  243.08    9.60 
   2   6   3  236.38    9.10 
   2   6   3  243.28   10.50 
   2   6   3  224.88    9.60 
   2   6   3  238.28    9.40 
  -3  -6  -3  365.36   13.70 
  -3  -6  -3  359.36   13.00 
  -3  -6  -3  377.36   14.50 
   3   6   3  337.87   13.60 
   3   6   3  357.26   13.40 
   3   6   3  368.36   14.50 
  -4  -6  -3   13.70    1.80 
  -4  -6  -3   15.90    1.70 
  -4  -6  -3   13.10    2.00 
  -4  -6  -3   12.40    1.30 
  -4  -6  -3   14.70    1.70 
   4   6   3   14.80    1.40 
   4   6   3   14.70    2.10 
   4   6   3   13.00    2.00 
   4   6   3   15.80    1.60 
   4   6   3   11.70    1.70 
  -5  -6  -3  107.89    5.70 
  -5  -6  -3  104.79    4.70 
  -5  -6  -3  106.59    5.00 
  -5  -6  -3  105.29    5.00 
  -5  -6  -3  104.79    4.40 
  -5  -6  -3  101.99    4.80 
  -5  -6  -3  104.89    4.90 
  -5  -6  -3  106.39    5.30 
   5   6   3  101.29    4.80 
   5   6   3  104.99    5.00 
   5   6   3  105.59    4.70 
   5   6   3  104.89    4.90 
   5   6   3  110.09    4.50 
   5   6   3   99.29    4.40 
  -6  -6  -3  284.67   10.50 
  -6  -6  -3  259.37   10.60 
  -6  -6  -3  273.07   11.10 
  -6  -6  -3  275.47   10.70 
  -6  -6  -3  283.87   10.70 
  -6  -6  -3  267.77   10.60 
   6   6   3  279.77   10.20 
   6   6   3  268.87   10.70 
   6   6   3  265.77   10.20 
   6   6   3  283.47   10.50 
   6   6   3  262.27   10.70 
   6   6   3  277.47   10.90 
   6   6   3  279.47   10.20 
  -7  -6  -3  121.09    5.50 
  -7  -6  -3  121.69    5.70 
  -7  -6  -3  124.09    6.30 
  -7  -6  -3  122.99    6.30 
  -7  -6  -3  129.59    5.90 
  -7  -6  -3  127.29    5.90 
   7   6   3  123.99    5.30 
   7   6   3  123.39    5.30 
   7   6   3  124.19    7.00 
   7   6   3  128.79    6.20 
   7   6   3  128.59    5.70 
   7   6   3  127.69    6.00 
   7   6   3  128.19    5.50 
  -8  -6  -3   97.99    4.90 
  -8  -6  -3   93.99    5.60 
  -8  -6  -3   98.09    5.50 
  -8  -6  -3   95.39    4.70 
  -8  -6  -3  102.89    5.30 
  -8  -6  -3  107.79    5.20 
   8   6   3  100.79    4.90 
   8   6   3   91.99    6.30 
   8   6   3  101.79    5.50 
   8   6   3  100.39    4.80 
   8   6   3   99.39    4.50 
   8   6   3   99.89    4.40 
   8   6   3  101.09    5.30 
  -9  -6  -3  195.68    8.20 
  -9  -6  -3  187.68    7.70 
  -9  -6  -3  190.08    8.40 
  -9  -6  -3  206.88    8.80 
   9   6   3  199.18    7.70 
   9   6   3  177.58    8.50 
   9   6   3  193.48    8.40 
   9   6   3  191.28    8.00 
   9   6   3  206.18    8.00 
 -10  -6  -3   72.89    4.20 
 -10  -6  -3   73.39    3.80 
  10   6   3   74.69    3.60 
  10   6   3   63.39    3.20 
  10   6   3   66.09    3.90 
   4  -7  -3   78.99    4.50 
   4  -7  -3   87.19    4.30 
  -4   7   3   88.29    4.00 
   3  -7  -3   33.20    3.00 
   3  -7  -3   30.20    2.40 
   3  -7  -3   33.90    2.40 
   3  -7  -3   29.50    2.20 
  -3   7   3   36.40    2.70 
  -3   7   3   34.90    2.70 
  -3   7   3   31.90    2.20 
   2  -7  -3  221.48    9.60 
   2  -7  -3  247.98   10.40 
   2  -7  -3  238.58    9.50 
   2  -7  -3  245.98    9.80 
   2  -7  -3  250.17    9.50 
  -2   7   3  218.28   10.40 
  -2   7   3  247.38    9.90 
  -2   7   3  215.48   16.80 
  -2   7   3  237.88    9.80 
  -2   7   3  237.68   11.10 
  -2   7   3  247.08    9.30 
   1  -7  -3   35.30    3.10 
   1  -7  -3   39.30    3.80 
   1  -7  -3   41.40    3.50 
   1  -7  -3   39.00    2.80 
   1  -7  -3   38.60    2.80 
   1  -7  -3   41.80    3.20 
  -1   7   3   37.40    2.90 
  -1   7   3   39.60    2.70 
  -1   7   3   35.30    8.00 
  -1   7   3   39.80    3.00 
  -1   7   3   36.30    3.50 
  -1   7   3   38.70    3.90 
   0  -7  -3  134.99    6.70 
   0  -7  -3  135.39    6.60 
   0  -7  -3  130.89    6.70 
   0  -7  -3  141.99    6.50 
   0  -7  -3  133.09    6.70 
   0  -7  -3  141.19    7.70 
   0  -7  -3  138.79    6.30 
   0  -7  -3  145.89    6.20 
   0   7   3  144.79    6.40 
   0   7   3  142.19    6.10 
   0   7   3  144.89    6.50 
   0   7   3  134.79    7.40 
   0   7   3  144.19   13.60 
   0   7   3  137.29    8.00 
   0   7   3  129.99    6.80 
  -1  -7  -3   51.59    3.20 
  -1  -7  -3   47.10    3.10 
  -1  -7  -3   50.29    3.40 
  -1  -7  -3   52.79    4.20 
  -1  -7  -3   49.20    3.50 
  -1  -7  -3   49.50    3.60 
  -1  -7  -3   56.39    3.10 
  -1  -7  -3   46.40    3.60 
   1   7   3   48.60    2.90 
   1   7   3   47.70    4.30 
   1   7   3   49.00    2.60 
   1   7   3   47.90    3.80 
   1   7   3   50.79    3.10 
   1   7   3   50.29    3.30 
   1   7   3   45.70    3.20 
  -2  -7  -3   97.09    5.20 
  -2  -7  -3  111.09    6.20 
  -2  -7  -3  102.09    4.40 
  -2  -7  -3   92.59    4.60 
  -2  -7  -3  107.29    5.30 
  -2  -7  -3   96.59    4.50 
  -2  -7  -3   96.49    4.80 
  -2  -7  -3   98.39    5.10 
  -2  -7  -3   88.89    4.60 
   2   7   3   96.89    6.00 
   2   7   3   87.19    4.80 
   2   7   3   87.99    4.10 
   2   7   3   99.59    4.80 
   2   7   3   86.69    4.30 
   2   7   3   92.49    4.90 
  -3  -7  -3  224.78    8.90 
  -3  -7  -3  235.38    9.70 
  -3  -7  -3  240.08    9.60 
  -3  -7  -3  225.48    8.80 
  -3  -7  -3  233.28    9.10 
  -3  -7  -3  225.88    9.60 
  -3  -7  -3  230.38    9.20 
  -3  -7  -3  229.58    9.10 
  -3  -7  -3  244.58   10.60 
   3   7   3  243.88   10.70 
   3   7   3  225.58    8.60 
   3   7   3  215.78    8.70 
   3   7   3  236.78    9.50 
   3   7   3  222.98    9.40 
   3   7   3  222.08    9.20 
   3   7   3  214.58    8.60 
  -4  -7  -3  320.67   12.90 
  -4  -7  -3  340.07   12.90 
  -4  -7  -3  333.57   12.50 
  -4  -7  -3  345.07   12.90 
  -4  -7  -3  326.17   12.30 
  -4  -7  -3  343.87   13.80 
  -4  -7  -3  316.37   12.00 
  -4  -7  -3  327.07   12.30 
  -4  -7  -3  328.37   12.20 
   4   7   3  314.67   12.60 
   4   7   3  333.37   13.80 
   4   7   3  312.77   11.90 
   4   7   3  313.47   12.10 
   4   7   3  329.77   12.50 
   4   7   3  336.77   12.80 
   4   7   3  315.57   12.00 
   4   7   3  335.67   12.00 
  -5  -7  -3   26.20    1.90 
  -5  -7  -3   27.60    2.60 
  -5  -7  -3   29.20    2.80 
  -5  -7  -3   33.20    3.20 
  -5  -7  -3   27.50    2.20 
  -5  -7  -3   26.80    2.20 
  -5  -7  -3   30.80    2.10 
  -5  -7  -3   30.20    2.50 
  -5  -7  -3   29.30    2.60 
   5   7   3   28.90    2.50 
   5   7   3   26.20    1.90 
   5   7   3   29.50    2.00 
   5   7   3   24.40    2.30 
   5   7   3   25.70    2.20 
  -6  -7  -3  106.49    5.70 
  -6  -7  -3  111.99    5.10 
  -6  -7  -3  106.39    5.40 
  -6  -7  -3  113.19    5.40 
  -6  -7  -3  108.29    5.20 
   6   7   3  111.29    4.80 
   6   7   3  112.39    4.90 
   6   7   3  118.79    5.30 
   6   7   3  107.89    5.40 
   6   7   3  110.59    5.40 
  -7  -7  -3   17.60    2.10 
  -7  -7  -3   14.00    2.00 
  -7  -7  -3   17.90    2.50 
  -7  -7  -3   14.90    1.80 
  -7  -7  -3   18.00    2.30 
   7   7   3   16.70    1.70 
   7   7   3   16.70    1.80 
   7   7   3   14.40    1.90 
   7   7   3   16.30    1.70 
   7   7   3   16.80    2.10 
  -8  -7  -3  127.09    6.50 
  -8  -7  -3  133.89    6.10 
  -8  -7  -3  121.69    5.60 
  -8  -7  -3  129.09    6.00 
   8   7   3  127.29    5.40 
   8   7   3  125.79    6.20 
   8   7   3  125.39    5.60 
   8   7   3  129.99    5.90 
   8   7   3  130.29    5.50 
  -9  -7  -3    9.60    2.00 
  -9  -7  -3   10.60    1.70 
  -9  -7  -3    8.30    1.50 
   9   7   3    8.70    1.50 
   9   7   3    7.70    1.30 
   9   7   3   10.10    1.80 
   9   7   3    6.50    1.10 
   9   7   3   10.60    1.50 
 -10  -7  -3   24.00    2.10 
 -10  -7  -3   26.10    2.60 
  10   7   3   22.10    1.90 
  10   7   3   22.00    1.90 
  10   7   3   23.80    2.30 
  10   7   3   23.00    1.60 
  -3   8   3  122.89    5.30 
  -3   8   3  134.59    5.50 
   2  -8  -3   18.70    1.80 
   2  -8  -3   19.30    2.00 
   2  -8  -3   19.80    1.80 
   2  -8  -3   13.80    1.90 
  -2   8   3   20.00    1.80 
  -2   8   3   20.20    2.10 
  -2   8   3   18.50    2.00 
   1  -8  -3   29.70    2.40 
   1  -8  -3   29.90    2.40 
   1  -8  -3   31.00    2.90 
   1  -8  -3   28.30    2.70 
   1  -8  -3   31.40    2.80 
   1  -8  -3   30.10    3.10 
  -1   8   3   21.20    4.50 
  -1   8   3   32.10    2.80 
  -1   8   3   29.20    2.50 
  -1   8   3   27.40    2.40 
   0  -8  -3   35.70    2.60 
   0  -8  -3   33.70    3.10 
   0  -8  -3   32.20    3.60 
   0  -8  -3   31.70    3.10 
   0  -8  -3   32.40    2.70 
   0  -8  -3   36.20    3.10 
   0  -8  -3   32.30    3.10 
   0   8   3   37.40    2.60 
   0   8   3   30.30    2.60 
   0   8   3   35.90    3.00 
   0   8   3   30.40    7.20 
  -1  -8  -3  123.49    7.30 
  -1  -8  -3  129.09    6.30 
  -1  -8  -3  126.59    5.70 
  -1  -8  -3  111.39    6.30 
  -1  -8  -3  122.69    5.90 
  -1  -8  -3  126.49    6.40 
  -1  -8  -3  127.29    6.10 
   1   8   3  111.69    5.10 
   1   8   3  118.79   12.80 
   1   8   3  113.19    7.80 
   1   8   3  120.29    6.00 
   1   8   3  129.29    6.10 
   1   8   3  133.69    5.70 
  -2  -8  -3  408.96   17.00 
  -2  -8  -3  396.66   15.80 
  -2  -8  -3  390.06   15.10 
  -2  -8  -3  409.26   15.00 
  -2  -8  -3  416.76   15.40 
  -2  -8  -3  393.26   15.80 
  -2  -8  -3  416.16   15.30 
  -2  -8  -3  404.26   15.70 
   2   8   3  378.56   14.50 
   2   8   3  414.46   15.00 
   2   8   3  405.16   15.60 
   2   8   3  421.06   15.40 
   2   8   3  388.76   17.20 
  -3  -8  -3  667.43   23.20 
  -3  -8  -3  636.24   23.70 
  -3  -8  -3  667.43   23.70 
  -3  -8  -3  655.43   23.00 
  -3  -8  -3  658.73   24.90 
  -3  -8  -3  621.84   23.60 
  -3  -8  -3  647.44   23.10 
  -3  -8  -3  653.03   22.80 
   3   8   3  622.14   22.40 
   3   8   3  638.94   23.50 
   3   8   3  614.44   22.40 
   3   8   3  615.64   23.10 
   3   8   3  625.74   22.60 
   3   8   3  626.74   25.00 
  -4  -8  -3  820.52   27.70 
  -4  -8  -3  781.82   28.50 
  -4  -8  -3  809.72   28.40 
  -4  -8  -3  804.92   29.50 
  -4  -8  -3  756.32   27.70 
  -4  -8  -3  760.52   28.40 
  -4  -8  -3  781.02   27.80 
  -4  -8  -3  792.42   28.00 
   4   8   3  795.12   27.30 
   4   8   3  756.42   27.40 
   4   8   3  819.52   28.40 
   4   8   3  739.23   29.50 
   4   8   3  791.32   28.00 
   4   8   3  769.52   27.30 
   4   8   3  784.02   27.30 
  -5  -8  -3   76.29    4.30 
  -5  -8  -3   74.69    4.60 
  -5  -8  -3   70.99    4.00 
  -5  -8  -3   71.29    4.40 
  -5  -8  -3   73.09    5.10 
  -5  -8  -3   75.79    3.90 
  -5  -8  -3   73.79    4.00 
  -5  -8  -3   77.39    4.60 
   5   8   3   79.19    3.70 
   5   8   3   77.89    3.90 
   5   8   3   78.29    4.50 
   5   8   3   79.39    3.80 
   5   8   3   79.59    4.30 
  -6  -8  -3   11.80    1.70 
  -6  -8  -3    8.00    1.70 
  -6  -8  -3   12.30    2.00 
  -6  -8  -3   11.60    2.30 
   6   8   3    9.20    1.60 
   6   8   3   11.80    2.00 
   6   8   3   10.40    1.50 
   6   8   3   10.80    1.80 
   6   8   3   10.70    1.40 
  -7  -8  -3   56.19    3.50 
  -7  -8  -3   61.29    4.30 
  -7  -8  -3   59.59    3.40 
  -7  -8  -3   61.19    3.80 
  -7  -8  -3   59.89    3.80 
   7   8   3   57.39    3.10 
   7   8   3   60.39    3.80 
   7   8   3   63.79    3.30 
   7   8   3   58.19    3.60 
  -8  -8  -3  721.23   24.40 
  -8  -8  -3  642.64   23.80 
  -8  -8  -3  683.53   24.10 
  -8  -8  -3  672.53   24.80 
   8   8   3  682.63   23.80 
   8   8   3  648.34   24.40 
   8   8   3  661.43   23.70 
   8   8   3  704.33   24.20 
  -9  -8  -3  289.37   10.90 
  -9  -8  -3  300.37   11.10 
  -9  -8  -3  308.27   11.70 
   9   8   3  273.97   10.50 
   9   8   3  282.67   11.30 
   9   8   3  309.57   11.10 
   9   8   3  262.27   10.60 
   9   8   3  277.67   10.50 
 -10  -8  -3  283.47   10.20 
 -10  -8  -3  302.27   10.80 
 -10  -8  -3  239.28   10.50 
  10   8   3  271.87   10.50 
  10   8   3  283.67   10.20 
   1  -9  -3   74.69    4.10 
   1  -9  -3   77.59    3.60 
   1  -9  -3   74.49    4.30 
   1  -9  -3   78.79    3.90 
   1  -9  -3   74.89    3.70 
  -1   9   3   82.59    3.80 
  -1   9   3   87.09    3.80 
  -1   9   3   87.39    4.10 
   0  -9  -3  214.48    8.20 
   0  -9  -3  193.48    8.30 
   0  -9  -3  192.78    8.70 
   0  -9  -3  185.88    7.80 
   0  -9  -3  200.88    8.30 
   0   9   3  208.98    8.00 
   0   9   3  201.78    8.30 
  -1  -9  -3   40.90    3.40 
  -1  -9  -3   42.40    3.60 
  -1  -9  -3   63.59    7.00 
  -1  -9  -3   44.60    2.90 
  -1  -9  -3   47.60    3.30 
  -1  -9  -3   47.30    3.20 
   1   9   3   34.20    8.30 
   1   9   3   45.60    3.30 
   1   9   3   40.50    3.00 
   1   9   3   46.50    3.00 
  -2  -9  -3    8.70    2.10 
  -2  -9  -3    9.40    1.80 
  -2  -9  -3    9.10    2.40 
  -2  -9  -3    7.80    1.80 
  -2  -9  -3    7.60    1.60 
  -2  -9  -3    7.30    1.40 
   2   9   3   11.50    7.20 
   2   9   3    8.80    1.80 
   2   9   3    7.90    1.40 
   2   9   3    4.40    1.30 
   2   9   3    8.10    1.80 
  -3  -9  -3  331.57   12.80 
  -3  -9  -3  295.87   12.00 
  -3  -9  -3  333.57   12.30 
  -3  -9  -3  321.47   12.30 
  -3  -9  -3  295.07   12.70 
  -3  -9  -3  310.87   11.90 
  -3  -9  -3  305.67   13.80 
   3   9   3  317.97   11.80 
   3   9   3  317.27   12.30 
   3   9   3  292.07   11.40 
   3   9   3  319.67   12.60 
   3   9   3  292.07   11.40 
  -4  -9  -3   79.39    4.40 
  -4  -9  -3   78.99    4.10 
  -4  -9  -3   77.59    5.60 
  -4  -9  -3   82.39    5.00 
  -4  -9  -3   80.29    4.40 
  -4  -9  -3   79.49    4.80 
  -4  -9  -3   82.39    4.40 
   4   9   3   86.69    4.70 
   4   9   3   83.89    4.80 
   4   9   3   78.59    3.80 
   4   9   3   82.19    3.90 
   4   9   3   78.49    3.90 
  -5  -9  -3  197.58    8.20 
  -5  -9  -3  208.98    8.80 
  -5  -9  -3  193.08    8.10 
  -5  -9  -3  204.18    9.00 
  -5  -9  -3  194.78    8.30 
  -5  -9  -3  178.08    9.30 
  -5  -9  -3  186.38    7.90 
   5   9   3  206.68    7.90 
   5   9   3  190.08    7.90 
   5   9   3  196.38    8.40 
   5   9   3  204.48    8.90 
   5   9   3  200.38    7.70 
  -6  -9  -3  313.97   12.10 
  -6  -9  -3  319.37   12.70 
  -6  -9  -3  320.97   13.00 
  -6  -9  -3  322.67   12.50 
  -6  -9  -3  305.77   12.00 
   6   9   3  315.07   11.70 
   6   9   3  321.47   12.60 
   6   9   3  309.27   11.80 
   6   9   3  316.97   12.10 
   6   9   3  332.57   12.80 
  -7  -9  -3  295.17   11.90 
  -7  -9  -3  282.57   11.50 
  -7  -9  -3  312.47   11.60 
   7   9   3  273.27   10.70 
   7   9   3  275.07   11.50 
   7   9   3  286.97   10.90 
   7   9   3  299.47   11.30 
  -8  -9  -3  174.38    7.20 
  -8  -9  -3  171.38    7.70 
  -8  -9  -3  161.78    7.10 
   8   9   3  166.38    6.70 
   8   9   3  177.38    7.10 
   8   9   3  153.08    6.50 
   8   9   3  167.38    7.30 
  -9  -9  -3  242.88    9.20 
  -9  -9  -3  247.78    9.40 
  -9  -9  -3  251.97    9.80 
   9   9   3  243.88    9.00 
   9   9   3  235.48    9.50 
   9   9   3  261.17    9.40 
   9   9   3  225.98    8.90 
   0  10   3   13.20    1.90 
  -1 -10  -3   40.30    2.50 
  -1 -10  -3   38.70    2.70 
  -1 -10  -3   36.30    3.00 
  -1 -10  -3   42.00    2.70 
   1  10   3   38.70    2.70 
   1  10   3   43.60    2.60 
  -2 -10  -3  188.08    8.00 
  -2 -10  -3  209.58    8.40 
  -2 -10  -3  214.08    8.50 
  -2 -10  -3  201.88    8.90 
  -2 -10  -3  212.08    8.70 
   2  10   3  218.48    8.20 
   2  10   3  217.68    8.60 
   2  10   3  205.38    8.50 
  -3 -10  -3   58.09    3.90 
  -3 -10  -3   61.39    3.60 
  -3 -10  -3   53.79    3.10 
  -3 -10  -3   57.89    4.10 
  -3 -10  -3   55.79    3.40 
   3  10   3   61.19    3.70 
   3  10   3   62.29    3.30 
   3  10   3   65.19    3.90 
  -4 -10  -3  277.17   11.50 
  -4 -10  -3  269.57   11.20 
  -4 -10  -3  244.58   10.30 
  -4 -10  -3  266.97   10.70 
  -4 -10  -3  291.57   10.90 
  -4 -10  -3  307.47   10.90 
   4  10   3  290.97   10.80 
   4  10   3  291.67   11.40 
   4  10   3  279.47   11.00 
   4  10   3  257.67   10.20 
  -5 -10  -3  372.46   14.00 
  -5 -10  -3  336.87   13.20 
  -5 -10  -3  364.26   13.80 
  -5 -10  -3  367.46   13.30 
  -5 -10  -3  362.36   13.40 
  -5 -10  -3  352.86   13.30 
   5  10   3  356.36   13.80 
   5  10   3  344.97   13.40 
   5  10   3  320.07   12.70 
   5  10   3  353.16   12.90 
  -6 -10  -3  219.88    8.70 
  -6 -10  -3  237.18    9.70 
  -6 -10  -3  227.08    9.00 
  -6 -10  -3  237.58    9.40 
   6  10   3  218.18    8.70 
   6  10   3  234.58    9.40 
   6  10   3  194.48    8.30 
   6  10   3  228.78    8.60 
   6  10   3  209.68    9.00 
  -7 -10  -3   49.90    3.10 
  -7 -10  -3   51.29    3.60 
  -7 -10  -3   45.90    3.10 
   7  10   3   44.20    2.60 
   7  10   3   40.40    2.40 
   7  10   3   43.20    3.10 
   7  10   3   43.90    2.80 
  -8 -10  -3   79.29    4.00 
  -8 -10  -3   87.39    4.20 
  -8 -10  -3   79.19    4.40 
   8  10   3   84.29    3.90 
   8  10   3   74.49    4.00 
   8  10   3   85.69    3.70 
  -9 -10  -3  159.58    7.40 
   9  10   3  167.78    7.20 
  -3 -11  -3   78.59    3.80 
  -3 -11  -3   97.99    4.20 
  -3 -11  -3   93.59    4.20 
  -3 -11  -3   87.89    4.60 
   3  11   3   82.19    4.00 
  -4 -11  -3   12.80    1.60 
  -4 -11  -3   14.30    1.50 
  -4 -11  -3    8.20    1.20 
  -4 -11  -3   11.50    1.70 
   4  11   3   15.40    1.80 
   4  11   3   11.60    1.50 
  -5 -11  -3   59.99    3.10 
  -5 -11  -3   67.99    3.20 
  -5 -11  -3   61.59    3.80 
  -5 -11  -3   65.19    3.60 
   5  11   3   59.59    3.50 
   5  11   3   63.09    3.40 
  -6 -11  -3   14.20    1.40 
  -6 -11  -3   14.20    1.50 
  -6 -11  -3   17.80    1.90 
  -6 -11  -3   16.70    2.10 
   6  11   3   14.40    1.70 
   6  11   3   16.10    1.80 
   6  11   3   15.10    1.30 
  -7 -11  -3  102.09    5.30 
  -7 -11  -3   96.79    4.60 
  -7 -11  -3  100.09    4.70 
   7  11   3   98.89    4.10 
  -7  -9   4   15.50    2.40 
   6   9  -4  184.38    7.70 
   6   9  -4  222.08    7.80 
   6   9  -4  222.78    8.10 
   6   9  -4  194.88    7.60 
  -6  -9   4  206.48    8.00 
  -6  -9   4  211.28    8.30 
  -6  -9   4  209.78    8.00 
   5   9  -4   15.10    1.50 
   5   9  -4   13.30    1.60 
   5   9  -4   17.00    1.60 
  -5  -9   4   13.90    1.60 
  -5  -9   4   16.10    1.90 
  -5  -9   4   17.50    2.00 
  -5  -9   4   16.00    1.70 
   4   9  -4  294.27   11.40 
   4   9  -4  320.57   11.30 
   4   9  -4  308.87   10.80 
   4   9  -4  297.37   10.80 
  -4  -9   4  292.97   11.20 
  -4  -9   4  284.57   11.30 
  -4  -9   4  291.47   11.10 
  -4  -9   4  272.27   10.80 
  -4  -9   4  281.07   11.20 
   3   9  -4  202.18    8.10 
   3   9  -4  204.68    7.90 
   3   9  -4  211.48    8.70 
   3   9  -4  209.28    7.90 
  -3  -9   4  206.48    8.10 
  -3  -9   4  201.48    8.40 
  -3  -9   4  191.38    8.10 
  -3  -9   4  195.58    8.00 
  -3  -9   4  210.78    8.30 
   2   9  -4   36.80    2.40 
   2   9  -4   34.80    2.20 
   2   9  -4   37.90    3.10 
   2   9  -4   35.80    2.30 
  -2  -9   4   37.10    2.90 
  -2  -9   4   32.50    2.50 
  -2  -9   4   36.10    2.40 
  -2  -9   4   33.00    2.50 
  -2  -9   4   35.70    3.00 
   1   9  -4   50.79    2.60 
   1   9  -4   47.90    2.50 
   1   9  -4   47.10    3.20 
  -1  -9   4   45.80    3.00 
  -1  -9   4   44.50    2.80 
  -1  -9   4   48.00    2.80 
  -1  -9   4   45.50    3.30 
  -1  -9   4   43.80    2.60 
   0   9  -4   15.40    1.90 
   0   9  -4   14.90    1.30 
   0  -9   4   14.80    1.80 
   0  -9   4   16.50    1.70 
   0  -9   4   17.10    2.00 
   7   8  -4   15.80    1.50 
   7   8  -4   15.90    1.60 
   7   8  -4   15.90    1.60 
  -7  -8   4   13.40    1.50 
  -7  -8   4   11.70    1.70 
  -7  -8   4    9.70    1.30 
   6   8  -4  198.68    8.00 
   6   8  -4  215.78    8.20 
   6   8  -4  207.28    7.80 
   6   8  -4  190.08    7.30 
   6   8  -4  188.48    7.60 
  -6  -8   4  191.18    7.90 
  -6  -8   4  209.68    8.50 
  -6  -8   4  191.48    7.70 
  -6  -8   4  203.58    8.20 
  -6  -8   4  217.08    8.20 
   5   8  -4  478.65   16.50 
   5   8  -4  472.45   16.90 
   5   8  -4  450.85   16.00 
   5   8  -4  463.75   16.50 
  -5  -8   4  441.36   16.90 
  -5  -8   4  473.45   17.30 
  -5  -8   4  455.95   16.90 
  -5  -8   4  453.05   16.80 
  -5  -8   4  435.96   16.60 
   4   8  -4   35.80    2.10 
   4   8  -4   38.40    3.00 
   4   8  -4   37.60    2.50 
   4   8  -4   39.80    2.90 
   4   8  -4   38.10    2.40 
   4   8  -4   22.90    4.20 
  -4  -8   4   39.50    2.90 
  -4  -8   4   36.00    3.00 
  -4  -8   4   34.50    3.00 
  -4  -8   4   36.10    2.90 
  -4  -8   4   37.50    2.80 
   3   8  -4   62.19    3.70 
   3   8  -4   64.89    4.60 
   3   8  -4   69.79    4.30 
   3   8  -4   70.79    3.50 
   3   8  -4   67.09    3.00 
   3   8  -4   62.79    3.50 
  -3  -8   4   62.59    4.40 
  -3  -8   4   62.19    4.10 
  -3  -8   4   66.09    3.90 
  -3  -8   4   62.19    3.90 
  -3  -8   4   65.99    3.70 
  -3  -8   4   59.09    3.70 
   2   8  -4   39.70    3.30 
   2   8  -4   39.10    2.20 
   2   8  -4   41.90    2.60 
   2   8  -4   35.40    3.50 
   2   8  -4   42.60    2.60 
  -2  -8   4   36.20    2.90 
  -2  -8   4   41.70    3.60 
  -2  -8   4   43.20    3.40 
  -2  -8   4   42.50    2.90 
  -2  -8   4   41.00    3.10 
   1   8  -4  317.87   11.80 
   1   8  -4  292.27   11.20 
   1   8  -4  335.57   13.00 
   1   8  -4  332.97   11.90 
  -1  -8   4  332.27   12.70 
  -1  -8   4  312.37   13.00 
  -1  -8   4  294.37   11.90 
  -1  -8   4  333.17   12.40 
  -1  -8   4  315.67   12.20 
   0   8  -4  202.88    8.40 
   0   8  -4  223.58    9.30 
   0   8  -4  215.68    8.30 
   0   8  -4  229.18    8.50 
   0  -8   4  230.18    9.70 
   0  -8   4  215.58    8.90 
   0  -8   4  211.08    8.60 
   0  -8   4  206.48    9.10 
   0  -8   4  222.18    9.10 
  -1   8  -4  141.09    5.70 
  -1   8  -4  137.09    5.80 
  -1   8  -4  136.69    6.30 
   1  -8   4  139.09    6.20 
   1  -8   4  136.99    6.40 
   1  -8   4  135.29    6.70 
   1  -8   4  145.39    6.30 
  -2   8  -4   74.79    3.40 
   2  -8   4   77.69    3.70 
   2  -8   4   71.39    3.60 
   2  -8   4   74.49    4.00 
   2  -8   4   71.49    4.00 
   8   7  -4   45.50    2.60 
   8   7  -4   45.40    2.40 
  -8  -7   4   46.40    2.70 
   7   7  -4   80.59    4.00 
   7   7  -4   76.29    3.70 
   7   7  -4   76.79    3.90 
   7   7  -4   74.49    3.20 
  -7  -7   4   78.69    4.40 
  -7  -7   4   74.39    3.70 
  -7  -7   4   78.19    4.00 
  -7  -7   4   75.99    3.90 
   6   7  -4    3.10    0.90 
   6   7  -4    1.90    1.10 
   6   7  -4    1.80    1.40 
   6   7  -4    2.30    1.00 
   6   7  -4    2.80    7.40 
  -6  -7   4    4.00    1.40 
  -6  -7   4    2.10    1.20 
  -6  -7   4    3.50    1.30 
  -6  -7   4    1.80    1.20 
  -6  -7   4    3.80    1.30 
   5   7  -4   51.39    3.00 
   5   7  -4   58.79    3.50 
   5   7  -4   51.69    2.70 
   5   7  -4   48.70    2.80 
   5   7  -4   48.30    2.90 
  -5  -7   4   53.49    3.70 
  -5  -7   4   48.90    3.30 
  -5  -7   4   52.69    3.30 
  -5  -7   4   60.09    4.50 
  -5  -7   4   54.79    3.60 
  -5  -7   4   53.89    3.40 
  -5  -7   4   52.79    3.40 
   4   7  -4  180.58    7.30 
   4   7  -4  172.38    7.80 
   4   7  -4  176.98    7.60 
   4   7  -4  171.68    7.00 
   4   7  -4  173.38    8.60 
   4   7  -4  185.48    7.30 
   4   7  -4  183.08    6.90 
  -4  -7   4  187.28    7.70 
  -4  -7   4  184.98    8.10 
  -4  -7   4  172.98    8.30 
  -4  -7   4  178.18    7.70 
  -4  -7   4  177.58    7.90 
  -4  -7   4  191.38    7.90 
  -4  -7   4  171.58    8.00 
   3   7  -4   28.50    2.40 
   3   7  -4   28.30    2.90 
   3   7  -4   29.70    2.10 
   3   7  -4   27.50    2.10 
   3   7  -4   25.80    3.60 
   3   7  -4   30.90    3.30 
   3   7  -4   30.90    2.10 
  -3  -7   4   31.30    2.70 
  -3  -7   4   29.40    3.00 
  -3  -7   4   30.10    3.00 
  -3  -7   4   32.00    2.60 
  -3  -7   4   28.40    2.60 
  -3  -7   4   32.20    2.50 
  -3  -7   4   29.00    3.10 
   2   7  -4  212.18   11.00 
   2   7  -4  229.18    8.60 
   2   7  -4  234.88    8.50 
   2   7  -4  233.38    9.90 
   2   7  -4  232.88   10.40 
   2   7  -4  234.58    8.90 
  -2  -7   4  239.18    9.30 
  -2  -7   4  207.88   10.50 
  -2  -7   4  228.98   10.10 
  -2  -7   4  230.78    9.40 
  -2  -7   4  223.98    9.30 
  -2  -7   4  228.78    9.50 
  -2  -7   4  216.38    9.60 
  -2  -7   4  229.58    9.60 
   1   7  -4   54.99    3.00 
   1   7  -4   51.79    4.30 
   1   7  -4   49.40    3.80 
   1   7  -4   53.99    2.80 
   1   7  -4   53.69    2.80 
  -1  -7   4   50.69    3.20 
  -1  -7   4   53.19    3.60 
  -1  -7   4   50.79    4.50 
  -1  -7   4   52.69    4.10 
  -1  -7   4   51.89    3.80 
  -1  -7   4   52.89    3.50 
   0   7  -4   -0.90    8.90 
   0   7  -4   13.00    1.70 
   0   7  -4   13.40    1.60 
   0   7  -4   12.00    1.20 
   0   7  -4   17.20    3.00 
   0   7  -4   14.50    2.30 
   0  -7   4   12.00    1.70 
   0  -7   4   16.10    2.30 
   0  -7   4   14.40    1.80 
   0  -7   4    9.30    2.00 
   0  -7   4   11.70    2.00 
   0  -7   4   13.90    2.80 
   0  -7   4   12.30    1.70 
  -1   7  -4   57.69    3.30 
  -1   7  -4   54.29    3.00 
  -1   7  -4   56.39    3.90 
  -1   7  -4   55.59    4.40 
   1  -7   4   55.69    3.70 
   1  -7   4   53.99    4.10 
   1  -7   4   48.70    3.50 
   1  -7   4   53.99    4.60 
   1  -7   4   52.79    3.90 
   1  -7   4   50.39    3.10 
  -2   7  -4    4.90    1.10 
  -2   7  -4    5.00    1.30 
  -2   7  -4    2.00    1.20 
   2  -7   4    5.40    1.70 
   2  -7   4    5.50    1.60 
   2  -7   4    4.80    1.60 
   2  -7   4    3.90    1.10 
  -3   7  -4  110.69    4.60 
  -3   7  -4  105.39    4.80 
   3  -7   4  106.99    5.50 
   3  -7   4  112.09    5.20 
   3  -7   4  109.79    5.40 
   3  -7   4  107.39    4.60 
   9   6  -4    4.90    1.30 
   8   6  -4   43.80    2.50 
   8   6  -4   41.50    2.70 
  -8  -6   4   42.90    2.80 
   7   6  -4  404.06   14.40 
   7   6  -4  406.76   15.10 
   7   6  -4  423.96   14.80 
  -7  -6   4  403.66   15.20 
  -7  -6   4  400.06   14.90 
  -7  -6   4  407.76   15.60 
   6   6  -4  143.19    6.10 
   6   6  -4  141.99    5.90 
   6   6  -4  150.38    5.70 
   6   6  -4  136.79    6.20 
  -6  -6   4  141.99    6.40 
  -6  -6   4  146.19    6.50 
  -6  -6   4  146.29    6.50 
  -6  -6   4  149.29    6.60 
  -6  -6   4  139.29    6.90 
  -6  -6   4  148.69    6.90 
   5   6  -4  735.73   26.50 
   5   6  -4  712.83   29.20 
   5   6  -4  762.62   26.30 
   5   6  -4  772.02   26.50 
   5   6  -4  771.52   26.70 
   5   6  -4  767.22   27.00 
  -5  -6   4  758.32   27.00 
  -5  -6   4  786.02   27.20 
  -5  -6   4  754.42   27.20 
  -5  -6   4  775.52   27.10 
  -5  -6   4  781.92   27.80 
  -5  -6   4  786.52   27.60 
  -5  -6   4  727.13   27.40 
  -5  -6   4  783.92   27.40 
   4   6  -4  398.36   14.90 
   4   6  -4  408.46   14.60 
   4   6  -4  415.76   14.70 
   4   6  -4  410.26   17.50 
   4   6  -4  420.56   14.90 
  -4  -6   4  418.66   16.00 
  -4  -6   4  408.96   15.60 
  -4  -6   4  396.96   15.70 
  -4  -6   4  416.46   15.80 
  -4  -6   4  423.26   15.30 
  -4  -6   4  409.76   15.50 
  -4  -6   4  403.26   15.30 
  -4  -6   4  431.76   15.50 
   3   6  -4  136.29    5.40 
   3   6  -4  130.19    6.30 
   3   6  -4  139.29    7.80 
   3   6  -4  145.89    5.60 
   3   6  -4  133.69    5.60 
  -3  -6   4  128.79    6.60 
  -3  -6   4  135.79    6.50 
  -3  -6   4  139.29    6.10 
  -3  -6   4  138.89    6.40 
  -3  -6   4  130.39    6.00 
  -3  -6   4  130.09    6.30 
  -3  -6   4  137.99    6.80 
  -3  -6   4  136.39    6.20 
   2   6  -4   78.79    3.80 
   2   6  -4   86.19    3.70 
   2   6  -4   86.39    4.80 
   2   6  -4   88.39    3.80 
   2   6  -4   86.99    5.80 
   2   6  -4   85.69    5.10 
  -2  -6   4   84.99    5.30 
  -2  -6   4   69.59    5.40 
  -2  -6   4   83.89    4.70 
  -2  -6   4   86.29    4.40 
  -2  -6   4   88.19    4.60 
  -2  -6   4   87.29    5.00 
  -2  -6   4   85.79    4.60 
  -2  -6   4   85.09    4.30 
  -2  -6   4   84.29    4.40 
  -2  -6   4   84.89    4.80 
   1   6  -4  200.78    7.40 
   1   6  -4  184.58    7.70 
   1   6  -4  211.88    7.60 
   1   6  -4  177.88    9.20 
   1   6  -4  207.28    9.30 
   1   6  -4  187.68    9.70 
  -1  -6   4  198.28    8.20 
  -1  -6   4  207.38    8.30 
  -1  -6   4  184.18    8.50 
  -1  -6   4  199.18    8.90 
  -1  -6   4  201.28    8.70 
  -1  -6   4  196.78    9.60 
  -1  -6   4  205.28    8.10 
   0   6  -4  382.86   13.20 
   0   6  -4  382.86   13.40 
   0   6  -4  395.26   15.40 
   0   6  -4  346.27   14.50 
   0   6  -4  353.76   15.60 
   0   6  -4  380.96   13.60 
   0   6  -4  359.26   13.70 
   0  -6   4  361.36   13.80 
   0  -6   4  361.36   13.70 
   0  -6   4  380.36   14.20 
   0  -6   4  381.16   14.00 
   0  -6   4  349.67   14.40 
   0  -6   4  373.06   15.80 
   0  -6   4  377.06   14.80 
  -1   6  -4  588.84   21.00 
  -1   6  -4  593.24   20.90 
  -1   6  -4  611.34   22.70 
  -1   6  -4  553.44   20.40 
  -1   6  -4  581.04   20.30 
   1  -6   4  567.24   20.90 
   1  -6   4  607.74   21.50 
   1  -6   4  551.94   21.00 
   1  -6   4  604.64   21.90 
   1  -6   4  589.44   23.30 
   1  -6   4  599.14   22.20 
  -2   6  -4  266.87    9.90 
  -2   6  -4  250.87   11.50 
  -2   6  -4  265.77   10.20 
  -2   6  -4  245.98    9.30 
   2  -6   4  253.67   10.00 
   2  -6   4  259.27   11.20 
   2  -6   4  253.87   12.20 
   2  -6   4  246.68   10.50 
   2  -6   4  269.47   11.00 
  -3   6  -4   61.89    3.50 
  -3   6  -4   58.69    3.20 
  -3   6  -4   53.29    4.40 
  -3   6  -4   53.49    3.60 
   3  -6   4   57.39    4.20 
   3  -6   4   61.49    3.40 
   3  -6   4   57.69    4.00 
   3  -6   4   58.49    3.80 
  -4   6  -4    3.30    1.00 
  -4   6  -4    5.20    1.30 
  -4   6  -4    3.90    1.00 
   4  -6   4    3.60    1.10 
   4  -6   4    3.80    1.50 
   4  -6   4    6.40    1.60 
   4  -6   4    1.40    1.20 
  -5   6  -4   94.89    4.50 
  -5   6  -4   99.59    4.20 
   5  -6   4  114.49    4.80 
   5  -6   4  111.99    5.00 
   9   5  -4    8.80    1.20 
   9   5  -4   11.30    1.20 
   9   5  -4   10.00    1.10 
  -9  -5   4    8.40    1.40 
   8   5  -4  111.59    4.50 
   8   5  -4  116.99    5.00 
   8   5  -4  118.79    5.20 
   8   5  -4  112.59    5.10 
  -8  -5   4  113.79    5.00 
  -8  -5   4  115.09    5.10 
  -8  -5   4  121.29    5.30 
   7   5  -4    9.60    1.70 
   7   5  -4    6.00    1.10 
   7   5  -4    8.60    1.40 
   7   5  -4    9.40    1.20 
   7   5  -4    0.40    6.50 
  -7  -5   4    9.00    1.60 
  -7  -5   4    6.70    1.40 
  -7  -5   4   13.00    2.10 
  -7  -5   4    8.30    1.70 
   6   5  -4  541.55   19.50 
   6   5  -4  517.95   19.50 
   6   5  -4  574.74   19.30 
   6   5  -4  559.54   19.10 
   6   5  -4  510.15   21.90 
  -6  -5   4  544.85   20.50 
  -6  -5   4  553.84   19.90 
  -6  -5   4  555.44   20.00 
  -6  -5   4  555.64   20.40 
  -6  -5   4  549.95   19.80 
   5   5  -4   34.40    2.50 
   5   5  -4   34.90    2.30 
   5   5  -4   35.10    2.20 
   5   5  -4   40.10    2.30 
   5   5  -4   41.00    4.00 
  -5  -5   4   41.90    3.60 
  -5  -5   4   41.00    2.80 
  -5  -5   4   39.70    2.90 
  -5  -5   4   38.80    2.80 
  -5  -5   4   38.70    2.70 
  -5  -5   4   35.60    3.20 
  -5  -5   4   38.50    3.00 
  -5  -5   4   38.20    2.90 
   4   5  -4  173.48    7.00 
   4   5  -4  174.28    6.70 
   4   5  -4  187.88    6.90 
   4   5  -4  184.38    9.20 
   4   5  -4  177.48    7.90 
   4   5  -4  177.58    7.00 
  -4  -5   4  179.98    7.40 
  -4  -5   4  178.78    7.80 
  -4  -5   4  173.78    7.80 
  -4  -5   4  174.28    7.60 
  -4  -5   4  180.18    7.50 
  -4  -5   4  188.88    8.20 
  -4  -5   4  178.28    7.80 
  -4  -5   4  186.68    7.50 
  -4  -5   4  174.08    7.40 
   3   5  -4  146.69    6.60 
   3   5  -4  153.48    5.70 
   3   5  -4  140.59    5.50 
   3   5  -4  136.69    6.30 
   3   5  -4  140.59    5.80 
   3   5  -4  156.08    7.90 
  -3  -5   4  145.59    6.20 
  -3  -5   4  142.39    6.60 
  -3  -5   4  146.99    6.90 
  -3  -5   4  142.29    6.10 
  -3  -5   4  150.48    6.60 
  -3  -5   4  150.38    6.80 
  -3  -5   4  138.99    6.50 
  -3  -5   4  150.28    6.50 
  -3  -5   4  145.79    6.30 
  -3  -5   4  143.19    6.20 
   2   5  -4  163.28    6.00 
   2   5  -4  163.48    8.00 
   2   5  -4  150.88    6.00 
   2   5  -4  154.38    5.80 
   2   5  -4  157.48    6.90 
  -2  -5   4  153.18    7.40 
  -2  -5   4  149.69    6.70 
  -2  -5   4  145.79    6.90 
  -2  -5   4  151.28    6.50 
  -2  -5   4  153.28    6.70 
  -2  -5   4  165.68    7.90 
  -2  -5   4  153.08    7.10 
  -2  -5   4  156.98    6.50 
  -2  -5   4  156.68    6.50 
  -2  -5   4  156.58    6.70 
  -2  -5   4  151.48    6.70 
  -2  -5   4  152.98    6.90 
   1   5  -4  471.25   17.20 
   1   5  -4  424.96   15.40 
   1   5  -4  446.06   15.70 
   1   5  -4  462.95   17.80 
   1   5  -4  467.95   15.60 
   1   5  -4  439.66   16.40 
  -1  -5   4  430.46   16.50 
  -1  -5   4  436.66   16.90 
  -1  -5   4  418.36   16.30 
  -1  -5   4  440.56   16.10 
  -1  -5   4  431.76   16.70 
  -1  -5   4  469.95   17.60 
  -1  -5   4  432.26   15.90 
  -1  -5   4  422.66   16.50 
  -1  -5   4  420.26   16.10 
  -1  -5   4  467.85   16.60 
  -1  -5   4  451.55   16.20 
   0   5  -4   71.59    4.40 
   0   5  -4   63.09    3.30 
   0   5  -4   65.19    2.90 
   0   5  -4   63.39    4.00 
   0   5  -4   64.09    3.10 
   0   5  -4   67.49    3.00 
   0   5  -4   61.39    3.70 
   0   5  -4   63.89    4.60 
   0  -5   4   59.99    3.40 
   0  -5   4   65.39    4.50 
   0  -5   4   62.59    3.90 
   0  -5   4   57.99    3.50 
   0  -5   4   69.49    4.00 
   0  -5   4   63.89    3.80 
   0  -5   4   65.19    3.30 
   0  -5   4   65.69    4.30 
   0  -5   4   61.29    3.30 
  -1   5  -4  228.18    8.20 
  -1   5  -4  215.18    8.10 
  -1   5  -4  215.98    9.30 
  -1   5  -4  220.58    8.60 
  -1   5  -4  216.08    8.40 
  -1   5  -4  220.78   10.00 
  -1   5  -4  209.08    9.40 
  -1   5  -4  222.68    9.80 
   1  -5   4  205.58    8.60 
   1  -5   4  209.38    8.80 
   1  -5   4  215.38    9.40 
   1  -5   4  223.28    9.80 
   1  -5   4  218.68    8.50 
   1  -5   4  224.18   10.40 
  -2   5  -4  291.57   12.40 
  -2   5  -4  308.37   11.10 
  -2   5  -4  311.67   11.80 
  -2   5  -4  311.97   11.50 
  -2   5  -4  321.67   13.20 
  -2   5  -4  296.37   12.00 
  -2   5  -4  295.77   11.20 
   2  -5   4  314.87   13.80 
   2  -5   4  306.67   12.70 
   2  -5   4  313.77   12.20 
   2  -5   4  312.97   11.70 
  -3   5  -4   62.69    3.30 
  -3   5  -4   61.59    3.70 
  -3   5  -4   58.69    4.50 
  -3   5  -4   55.89    3.60 
  -3   5  -4   55.99    2.80 
   3  -5   4   57.99    4.00 
   3  -5   4   54.79    4.80 
   3  -5   4   60.19    4.30 
   3  -5   4   57.29    3.40 
  -4   5  -4    4.50    1.20 
  -4   5  -4    4.80    1.40 
  -4   5  -4    4.30    2.00 
  -4   5  -4    5.60    1.50 
   4  -5   4    6.00    1.70 
   4  -5   4    5.60    1.50 
   4  -5   4    3.20    1.60 
  -5   5  -4  369.96   13.40 
  -5   5  -4  355.56   13.50 
  -5   5  -4  373.36   13.90 
   5  -5   4  372.36   13.50 
   5  -5   4  360.96   14.20 
   5  -5   4  374.36   14.10 
  -6   5  -4   34.90    2.00 
  -6   5  -4   34.80    2.30 
   6  -5   4   36.60    2.60 
   6  -5   4   39.00    2.60 
   6  -5   4   33.80    2.10 
   9   4  -4   32.90    2.10 
   9   4  -4   36.80    2.10 
  -9  -4   4   31.60    2.10 
  -9  -4   4   34.10    2.20 
   8   4  -4  286.27   10.90 
   8   4  -4  272.87   10.20 
   8   4  -4  285.57   10.90 
   8   4  -4  299.57   10.80 
  -8  -4   4  277.57   10.80 
  -8  -4   4  295.17   11.00 
  -8  -4   4  281.97   10.70 
  -8  -4   4  297.27   11.10 
   7   4  -4   34.10    2.10 
   7   4  -4   31.10    2.10 
   7   4  -4   32.10    2.30 
   7   4  -4   33.60    2.70 
  -7  -4   4   32.60    2.80 
  -7  -4   4   30.50    2.50 
  -7  -4   4   33.20    2.60 
  -7  -4   4   33.10    2.60 
  -7  -4   4   30.20    2.60 
   6   4  -4  170.08    7.30 
   6   4  -4  176.28    6.70 
   6   4  -4  178.08    6.90 
   6   4  -4  175.28    7.00 
   6   4  -4  164.28    9.10 
  -6  -4   4  174.98    7.80 
  -6  -4   4  183.38    7.60 
  -6  -4   4  180.18    8.20 
  -6  -4   4  165.68    7.30 
  -6  -4   4  165.88    7.30 
  -6  -4   4  180.18    7.90 
  -6  -4   4  170.88    7.20 
  -6  -4   4  173.58    8.10 
   5   4  -4  392.66   14.50 
   5   4  -4  428.96   14.80 
   5   4  -4  428.16   14.70 
   5   4  -4  410.06   17.20 
   5   4  -4  398.86   15.00 
   5   4  -4  391.16   15.70 
  -5  -4   4  390.86   15.70 
  -5  -4   4  439.36   15.80 
  -5  -4   4  411.36   15.30 
  -5  -4   4  417.26   15.60 
  -5  -4   4  419.36   15.30 
  -5  -4   4  430.96   15.90 
  -5  -4   4  419.26   15.10 
  -5  -4   4  419.56   15.90 
  -5  -4   4  407.26   15.20 
  -5  -4   4  421.26   15.30 
  -5  -4   4  394.16   15.40 
   4   4  -4  573.64   21.00 
   4   4  -4  561.24   20.10 
   4   4  -4  599.04   22.50 
   4   4  -4  611.94   20.00 
   4   4  -4  562.24   19.80 
  -4  -4   4  568.74   20.70 
  -4  -4   4  554.64   20.40 
  -4  -4   4  589.04   21.10 
  -4  -4   4  571.24   20.50 
  -4  -4   4  586.34   20.90 
  -4  -4   4  580.14   20.60 
  -4  -4   4  574.64   21.00 
  -4  -4   4  547.65   20.90 
  -4  -4   4  582.34   20.60 
   3   4  -4  165.68    6.90 
   3   4  -4  159.98    6.00 
   3   4  -4  169.58    8.10 
  -3  -4   4  155.08    6.60 
  -3  -4   4  158.48    7.10 
   2   4  -4   61.59    4.20 
   2   4  -4   62.59    3.30 
   2   4  -4   57.69    2.50 
   2   4  -4   63.19    8.20 
  -2  -4   4   57.49    3.20 
  -2  -4   4   58.99    3.50 
   1   4  -4  446.86   16.60 
   1   4  -4  422.16   14.60 
   1   4  -4  383.06   21.50 
   1   4  -4  433.46   15.50 
  -1  -4   4  428.06   15.40 
  -1  -4   4  422.76   16.10 
  -1  -4   4  421.86   16.00 
   0   4  -4   75.79    9.20 
   0   4  -4   94.99    5.20 
   0   4  -4   95.19    4.30 
   0   4  -4   92.59    4.80 
   0   4  -4   89.79    3.60 
   0  -4   4   86.39    4.80 
   0  -4   4   91.99    4.50 
   0  -4   4   87.69    5.10 
  -1   4  -4 1368.96   44.60 
  -1   4  -4 1327.77   45.90 
  -1   4  -4 1280.77   46.20 
  -1   4  -4 1287.27   45.20 
  -1   4  -4 1376.96   46.20 
   1  -4   4 1246.58   44.90 
   1  -4   4 1377.26   45.80 
   1  -4   4 1328.97   46.10 
   1  -4   4 1239.18   45.70 
   1  -4   4 1347.77   46.70 
  -2   4  -4  314.77   12.40 
  -2   4  -4  317.37   10.80 
  -2   4  -4  289.77   11.00 
  -2   4  -4  305.07   12.00 
  -2   4  -4  285.17   11.50 
  -2   4  -4  286.77   12.00 
  -2   4  -4  295.97   10.70 
   2  -4   4  300.57   11.50 
   2  -4   4  294.47   11.40 
   2  -4   4  300.07   11.10 
   2  -4   4  294.27   11.10 
   2  -4   4  306.77   12.30 
   2  -4   4  282.67   11.90 
   2  -4   4  310.47   13.00 
  -3   4  -4  222.08    8.70 
  -3   4  -4  235.78   10.20 
  -3   4  -4  222.68    8.40 
  -3   4  -4  216.28    9.70 
  -3   4  -4  231.98    9.00 
  -3   4  -4  222.98    9.20 
  -3   4  -4  224.68    8.30 
  -3   4  -4  219.38    9.20 
  -3   4  -4  206.68    9.70 
   3  -4   4  223.58   10.70 
   3  -4   4  220.28    9.10 
   3  -4   4  223.48    8.70 
   3  -4   4  227.88    8.80 
   3  -4   4  226.38    9.30 
   3  -4   4  225.38    9.70 
   3  -4   4  235.68   10.10 
  -4   4  -4   55.99    3.90 
  -4   4  -4   57.89    3.70 
  -4   4  -4   58.49    3.20 
  -4   4  -4   56.49    3.70 
  -4   4  -4   55.19    2.70 
  -4   4  -4   60.89    4.60 
   4  -4   4   55.49    4.10 
   4  -4   4   56.39    3.70 
   4  -4   4   60.29    4.00 
   4  -4   4   64.69    3.50 
  -5   4  -4    3.90    1.40 
  -5   4  -4    5.90    1.60 
  -5   4  -4    4.20    1.10 
  -5   4  -4    2.30    1.70 
   5  -4   4    6.30    1.80 
   5  -4   4    3.90    1.50 
   5  -4   4    3.90    1.50 
   5  -4   4    3.40    1.30 
  -6   4  -4   94.19    4.40 
  -6   4  -4   99.59    4.40 
  -6   4  -4   98.09    5.00 
   6  -4   4  104.29    4.60 
   6  -4   4   91.39    4.90 
   6  -4   4  105.19    5.20 
   6  -4   4   90.29    4.60 
  -7   4  -4  106.39    5.40 
  -7   4  -4  145.39    5.70 
   7  -4   4  142.59    5.60 
   7  -4   4  124.59    5.20 
   9   3  -4   34.70    2.00 
  -9  -3   4   32.70    2.10 
  -9  -3   4   32.90    2.10 
   8   3  -4  103.89    4.90 
   8   3  -4   96.49    4.60 
   8   3  -4  109.19    4.70 
   8   3  -4   97.89    4.10 
  -8  -3   4  104.39    4.80 
  -8  -3   4  101.79    4.90 
  -8  -3   4  101.79    4.70 
  -8  -3   4  104.09    4.80 
   7   3  -4  128.39    5.10 
   7   3  -4  124.39    5.30 
   7   3  -4  117.19    6.20 
   7   3  -4  135.09    5.60 
   7   3  -4  125.59    5.60 
  -7  -3   4  128.39    5.90 
  -7  -3   4  129.99    5.80 
  -7  -3   4  121.99    6.40 
  -7  -3   4  135.49    5.90 
  -7  -3   4  122.49    6.10 
  -7  -3   4  123.39    5.80 
   6   3  -4  204.88    7.60 
   6   3  -4  200.88    7.90 
   6   3  -4  198.58    8.70 
   6   3  -4  206.68    7.80 
   6   3  -4  190.18   10.00 
   6   3  -4  201.08    8.20 
  -6  -3   4  205.08    8.70 
  -6  -3   4  208.28    8.80 
  -6  -3   4  206.18    8.30 
  -6  -3   4  202.88    9.00 
  -6  -3   4  202.28    8.40 
  -6  -3   4  193.88    8.20 
  -6  -3   4  207.48    9.10 
   5   3  -4  386.16   14.10 
   5   3  -4  423.26   14.30 
   5   3  -4  408.66   16.80 
   5   3  -4  419.66   14.40 
   5   3  -4  404.86   15.10 
   5   3  -4  394.96   15.30 
  -5  -3   4  409.16   15.20 
  -5  -3   4  407.36   14.90 
  -5  -3   4  410.46   15.40 
  -5  -3   4  403.86   14.70 
  -5  -3   4  415.36   15.50 
  -5  -3   4  369.86   14.90 
  -5  -3   4  383.26   15.30 
  -5  -3   4  403.06   14.80 
  -5  -3   4  378.86   14.70 
  -5  -3   4  424.26   15.30 
   4   3  -4   56.79    3.40 
   4   3  -4   59.89    3.40 
   4   3  -4   60.09    2.60 
  -4  -3   4   53.69    3.00 
  -4  -3   4   51.69    3.50 
  -4  -3   4   55.29    3.20 
  -4  -3   4   50.09    5.00 
  -4  -3   4   56.49    3.50 
  -4  -3   4   61.49    3.40 
  -4  -3   4   58.09    3.10 
  -4  -3   4   54.89    3.00 
   3   3  -4  373.96   13.60 
   3   3  -4  375.36   14.70 
   3   3  -4  355.86   12.70 
   3   3  -4  368.26   13.60 
  -3  -3   4  371.76   13.50 
  -3  -3   4  356.06   16.30 
   2   3  -4  254.27   10.50 
   2   3  -4  254.87    9.60 
   2   3  -4  252.07    9.30 
  -2  -3   4  249.18   11.80 
  -2  -3   4  240.28    9.50 
   1   3  -4   97.09    9.00 
   1   3  -4  111.99    4.50 
   1   3  -4  107.59    5.30 
  -1  -3   4   98.79    4.30 
  -1  -3   4  100.79    4.70 
  -1  -3   4   92.69    4.70 
   0   3  -4  121.59    9.60 
   0   3  -4  121.79    5.10 
   0   3  -4  121.79    5.80 
   0  -3   4  123.59    5.20 
   0  -3   4  115.79    5.60 
   0  -3   4  119.39    5.60 
  -1   3  -4 2440.86   80.19 
  -1   3  -4 2381.66   80.09 
  -1   3  -4 2292.97   79.49 
  -1   3  -4 2248.77   80.19 
  -1   3  -4 2289.57   78.99 
  -1   3  -4 2404.06   85.29 
   1  -3   4 2453.55   79.89 
   1  -3   4 2364.76   80.59 
   1  -3   4 2331.57   80.39 
  -2   3  -4  662.03   25.50 
  -2   3  -4  693.43   24.10 
  -2   3  -4  668.73   22.90 
  -2   3  -4  664.23   23.90 
  -2   3  -4  664.13   24.00 
   2  -3   4  671.23   24.70 
   2  -3   4  643.74   24.30 
  -3   3  -4  458.35   16.60 
  -3   3  -4  472.85   17.10 
  -3   3  -4  479.35   17.30 
  -3   3  -4  448.76   15.70 
  -3   3  -4  461.25   17.20 
  -3   3  -4  441.16   16.00 
  -3   3  -4  429.76   16.60 
  -3   3  -4  439.96   15.80 
   3  -3   4  458.65   16.20 
   3  -3   4  434.96   16.80 
   3  -3   4  466.15   17.90 
   3  -3   4  434.16   16.50 
   3  -3   4  435.76   17.00 
   3  -3   4  455.45   16.10 
   3  -3   4  431.16   16.40 
  -4   3  -4  138.39    5.70 
  -4   3  -4  147.09    6.60 
  -4   3  -4  145.49    6.00 
  -4   3  -4  148.39    6.70 
  -4   3  -4  134.89    7.00 
  -4   3  -4  147.39    5.70 
  -4   3  -4  141.59    7.10 
  -4   3  -4  144.19    7.10 
   4  -3   4  141.69    7.00 
   4  -3   4  148.49    6.90 
   4  -3   4  146.29    6.60 
   4  -3   4  148.19    6.20 
   4  -3   4  149.29    6.10 
  -5   3  -4  202.18    8.80 
  -5   3  -4  181.98    9.10 
  -5   3  -4  187.68    9.00 
  -5   3  -4  203.78    8.60 
  -5   3  -4  199.38    8.10 
  -5   3  -4  193.48    7.90 
   5  -3   4  205.88    8.20 
   5  -3   4  206.18    8.70 
   5  -3   4  193.68    8.80 
   5  -3   4  194.98    7.90 
  -6   3  -4   40.90    2.80 
  -6   3  -4   42.30    2.60 
  -6   3  -4   41.00    3.70 
  -6   3  -4   43.40    3.50 
   6  -3   4   41.70    3.50 
   6  -3   4   45.90    3.00 
   6  -3   4   39.60    3.20 
   6  -3   4   45.50    3.40 
  -7   3  -4    6.30    1.60 
  -7   3  -4    7.70    1.20 
   7  -3   4    5.70    1.60 
   7  -3   4    4.20    1.30 
   7  -3   4    8.00    1.40 
   9   2  -4  133.99    5.20 
  -9  -2   4  133.39    5.30 
  -9  -2   4  125.89    5.30 
   8   2  -4   12.20    1.60 
   8   2  -4   13.20    1.80 
  -8  -2   4   13.70    1.80 
  -8  -2   4   13.00    1.80 
  -8  -2   4   10.70    1.60 
   7   2  -4  423.36   16.20 
   7   2  -4  487.15   16.60 
   7   2  -4  481.65   16.10 
   7   2  -4  482.05   16.80 
   7   2  -4  453.15   16.50 
   7   2  -4  429.66   17.50 
  -7  -2   4  422.36   17.10 
  -7  -2   4  444.26   17.40 
  -7  -2   4  466.15   16.90 
  -7  -2   4  469.05   16.80 
  -7  -2   4  465.15   16.80 
  -7  -2   4  445.86   16.70 
   6   2  -4   19.50    2.60 
   6   2  -4   14.40    2.70 
   6   2  -4   23.00    1.80 
   6   2  -4   22.80    2.00 
   6   2  -4   20.60    1.60 
   6   2  -4   19.30    1.70 
  -6  -2   4   22.70    2.40 
  -6  -2   4   21.70    2.10 
  -6  -2   4   17.50    2.50 
  -6  -2   4   21.30    2.20 
  -6  -2   4   21.90    2.80 
  -6  -2   4   20.10    2.10 
   5   2  -4   19.10    2.40 
   5   2  -4   18.20    2.00 
   5   2  -4   16.80    1.50 
   5   2  -4   17.00    2.60 
   5   2  -4   18.90    1.50 
   5   2  -4   17.40    1.70 
   5   2  -4   16.10    1.30 
   5   2  -4   15.60    1.50 
  -5  -2   4   17.60    1.80 
  -5  -2   4   16.60    2.00 
  -5  -2   4   18.60    2.10 
  -5  -2   4   15.50    1.90 
  -5  -2   4   19.50    2.40 
  -5  -2   4   17.50    1.70 
  -5  -2   4   17.40    2.20 
   4   2  -4   65.29    3.60 
   4   2  -4   71.19    4.30 
   4   2  -4   76.39    3.90 
   4   2  -4   68.49    2.90 
   4   2  -4   72.99    3.90 
   4   2  -4   70.99    3.00 
  -4  -2   4   72.09    3.70 
  -4  -2   4   67.19    5.80 
   3   2  -4 1390.56   48.10 
   3   2  -4 1489.95   49.10 
   3   2  -4 1356.96   48.70 
   3   2  -4 1408.36   49.40 
   3   2  -4 1408.96   48.20 
   3   2  -4 1482.65   49.20 
  -3  -2   4 1493.35   49.00 
  -3  -2   4 1436.46   51.99 
   2   2  -4 1505.25   50.49 
   2   2  -4 1524.65   51.19 
   2   2  -4 1563.64   51.29 
   2   2  -4 1434.66   51.19 
  -2  -2   4 1563.14   53.89 
  -2  -2   4 1502.75   51.09 
  -2  -2   4 1442.96   50.99 
   1   2  -4  166.78    7.10 
   1   2  -4  167.68    6.40 
   1   2  -4  153.88    5.70 
   1   2  -4  159.58    6.10 
  -1  -2   4  169.68    8.30 
  -1  -2   4  163.88    6.60 
   0   2  -4 1907.31   62.09 
   0   2  -4 1874.61   62.79 
   0   2  -4 1813.42   61.69 
   0  -2   4 1747.13   62.59 
   0  -2   4 1865.61   62.59 
  -1   2  -4  217.28    8.90 
  -1   2  -4  265.77   12.50 
  -1   2  -4  227.28    8.90 
  -1   2  -4  234.78    9.00 
  -1   2  -4  220.98    8.40 
   1  -2   4  231.28    9.10 
   1  -2   4  225.48    9.30 
  -2   2  -4  734.43   25.30 
  -2   2  -4  723.03   25.10 
  -2   2  -4  698.23   25.80 
  -2   2  -4  757.62   26.00 
  -2   2  -4  769.72   26.10 
  -2   2  -4  753.62   26.00 
   2  -2   4  728.43   26.50 
   2  -2   4  737.83   26.30 
  -3   2  -4  794.22   28.90 
  -3   2  -4  840.02   29.00 
  -3   2  -4  839.02   28.60 
  -3   2  -4  823.22   27.90 
  -3   2  -4  829.92   29.00 
   3  -2   4  740.23   29.00 
   3  -2   4  848.32   29.70 
  -4   2  -4  131.19    5.20 
  -4   2  -4  131.09    6.30 
  -4   2  -4  134.49    6.50 
  -4   2  -4  128.09    5.40 
  -4   2  -4  135.79    5.30 
  -4   2  -4  136.99    6.00 
  -4   2  -4  130.99    6.10 
  -4   2  -4  138.69    6.50 
   4  -2   4  139.79    5.90 
   4  -2   4  132.09    5.50 
   4  -2   4  122.89    6.40 
   4  -2   4  126.99    5.50 
   4  -2   4  130.09    6.30 
   4  -2   4  125.79    6.00 
   4  -2   4  146.59    6.10 
  -5   2  -4  131.99    7.30 
  -5   2  -4  125.99    5.50 
  -5   2  -4  131.99    6.20 
  -5   2  -4  129.59    6.70 
  -5   2  -4  134.39    6.50 
  -5   2  -4  126.29    5.10 
  -5   2  -4  129.69    6.70 
   5  -2   4  136.19    6.20 
   5  -2   4  133.79    5.70 
   5  -2   4  121.79    6.20 
   5  -2   4  130.49    5.70 
  -6   2  -4  195.78    7.60 
  -6   2  -4  168.28    8.60 
  -6   2  -4  186.38    8.30 
  -6   2  -4  175.48    8.60 
  -6   2  -4  189.08    8.40 
  -6   2  -4  173.68    7.40 
  -6   2  -4  178.58    7.80 
   6  -2   4  191.78    7.70 
   6  -2   4  181.78    7.50 
   6  -2   4  198.98    8.30 
  -7   2  -4  195.98    8.70 
  -7   2  -4  226.68    8.50 
  -7   2  -4  223.68    9.30 
   7  -2   4  221.58    8.80 
   7  -2   4  218.98    8.70 
   7  -2   4  210.98    9.20 
  -8   2  -4  208.78    8.00 
  -8   2  -4  217.08    8.60 
   8  -2   4  209.08    8.20 
   8  -2   4  206.38    8.50 
   8  -2   4  227.38    8.80 
   8   1  -4   20.40    2.60 
   8   1  -4   23.70    2.10 
   8   1  -4   27.80    2.10 
  -8  -1   4   24.30    2.10 
  -8  -1   4   24.80    2.20 
  -8  -1   4   23.60    2.00 
  -8  -1   4   22.30    2.20 
   7   1  -4  601.04   20.70 
   7   1  -4  593.64   21.20 
   7   1  -4  551.24   22.20 
   7   1  -4  610.84   21.40 
  -7  -1   4  610.44   21.50 
  -7  -1   4  590.04   21.50 
  -7  -1   4  606.44   21.50 
  -7  -1   4  603.04   21.70 
   6   1  -4   84.69    4.30 
   6   1  -4   81.59    4.90 
   6   1  -4   83.89    3.80 
   6   1  -4   77.39    5.70 
   6   1  -4   85.29    3.70 
   6   1  -4   79.09    3.90 
  -6  -1   4   84.69    5.10 
  -6  -1   4   83.89    4.30 
  -6  -1   4   78.99    4.50 
  -6  -1   4   84.49    4.50 
  -6  -1   4   75.29    4.10 
  -6  -1   4   88.29    4.30 
   5   1  -4   65.09    3.40 
   5   1  -4   71.69    4.10 
   5   1  -4   70.09    3.10 
   5   1  -4   70.79    3.20 
   5   1  -4   65.99    3.20 
   5   1  -4   72.19    4.90 
   5   1  -4   61.99    3.20 
  -5  -1   4   70.49    4.30 
  -5  -1   4   66.79    3.80 
  -5  -1   4   70.59    3.80 
  -5  -1   4   69.29    4.20 
  -5  -1   4   69.79    3.60 
  -5  -1   4   70.89    3.60 
  -5  -1   4   67.59    4.10 
  -5  -1   4   68.79    3.70 
  -5  -1   4   64.49    3.50 
   4   1  -4   36.70    1.90 
   4   1  -4   32.80    1.80 
   4   1  -4   33.70    2.60 
   4   1  -4   36.90    3.20 
   4   1  -4   38.10    2.60 
  -4  -1   4   32.40    2.60 
  -4  -1   4   32.80    2.40 
  -4  -1   4   29.60    4.00 
   3   1  -4  398.46   13.70 
   3   1  -4  410.06   14.60 
   3   1  -4  402.16   15.00 
   3   1  -4  379.26   14.30 
  -3  -1   4  394.66   14.50 
  -3  -1   4  392.06   17.00 
  -3  -1   4  386.96   14.20 
   2   1  -4 1124.59   38.30 
   2   1  -4 1053.19   37.70 
   2   1  -4 1132.29   38.00 
   2   1  -4 1128.19   37.30 
  -2  -1   4 1073.39   37.70 
  -2  -1   4 1137.89   40.30 
   1   1  -4    7.20    0.60 
   1   1  -4    6.40    1.00 
   1   1  -4    8.00    1.00 
  -1  -1   4    8.70    1.90 
  -1  -1   4    8.30    1.10 
   0   1  -4   90.29    3.70 
   0   1  -4   87.99    3.50 
   0  -1   4   92.29    4.10 
  -1   1  -4  206.38    8.10 
  -1   1  -4  211.78    7.50 
  -1   1  -4  218.78    7.80 
   1  -1   4  239.88    8.50 
   1  -1   4  214.28    8.50 
  -2   1  -4 1149.98   41.20 
  -2   1  -4 1265.17   41.50 
  -2   1  -4 1138.79   41.00 
  -2   1  -4 1259.57   41.40 
  -2   1  -4 1202.68   40.60 
   2  -1   4 1128.99   41.00 
   2  -1   4 1279.67   41.70 
   2  -1   4 1246.08   41.80 
   2  -1   4 1198.48   41.80 
  -3   1  -4  486.35   17.30 
  -3   1  -4  483.25   17.00 
  -3   1  -4  491.45   17.40 
  -3   1  -4  443.06   17.10 
  -3   1  -4  471.05   16.40 
   3  -1   4  471.35   17.20 
   3  -1   4  482.85   17.50 
   3  -1   4  485.35   16.30 
  -4   1  -4  418.96   14.80 
  -4   1  -4  439.86   15.60 
  -4   1  -4  421.86   16.00 
  -4   1  -4  409.26   15.70 
  -4   1  -4  443.36   16.00 
   4  -1   4  421.06   14.70 
   4  -1   4  402.06   15.90 
   4  -1   4  424.46   15.90 
  -5   1  -4   20.50    2.10 
  -5   1  -4   25.00    2.40 
  -5   1  -4   22.00    1.60 
  -5   1  -4   26.40    2.60 
  -5   1  -4   22.70    1.70 
  -5   1  -4   26.00    2.30 
  -5   1  -4   22.40    2.50 
  -5   1  -4   22.40    1.60 
  -5   1  -4   22.80    2.40 
   5  -1   4   20.80    2.10 
   5  -1   4   24.70    1.90 
   5  -1   4   24.60    1.80 
   5  -1   4   23.30    2.10 
  -6   1  -4   11.50    1.50 
  -6   1  -4   12.60    2.10 
  -6   1  -4   10.80    2.10 
  -6   1  -4   11.60    2.00 
  -6   1  -4   10.10    1.80 
   6  -1   4   10.60    1.50 
   6  -1   4    8.60    1.40 
   6  -1   4    9.60    1.80 
  -7   1  -4  101.99    5.50 
  -7   1  -4  100.59    5.30 
  -7   1  -4   97.69    5.50 
  -7   1  -4  105.89    4.80 
   7  -1   4  111.09    5.00 
   7  -1   4  108.59    5.60 
   7  -1   4   97.39    4.80 
  -8   1  -4   92.49    4.20 
  -8   1  -4   86.29    4.70 
  -8   1  -4   98.09    5.00 
   8  -1   4   89.69    4.40 
   8  -1   4   96.69    5.00 
   8  -1   4   94.49    4.30 
  -9   1  -4    4.70    1.40 
   9  -1   4    6.30    1.10 
   9  -1   4    5.00    1.20 
   9  -1   4    5.90    1.40 
   8   0  -4   45.20    2.60 
   8   0  -4   45.90    2.60 
   8   0  -4   40.60    3.00 
  -8   0   4   41.20    2.60 
  -8   0   4   43.30    2.50 
  -8   0   4   43.00    2.80 
  -8   0   4   39.20    2.60 
  -8   0   4   42.70    2.50 
   7   0  -4  207.68    8.20 
   7   0  -4  204.78    8.10 
   7   0  -4  211.88    9.20 
   7   0  -4  199.58    9.10 
   7   0  -4  195.78    7.50 
  -7   0   4  204.58    8.30 
  -7   0   4  203.68    8.30 
  -7   0   4  190.28    8.50 
  -7   0   4  201.88    8.20 
   6   0  -4  157.98    6.50 
   6   0  -4  164.98    6.80 
   6   0  -4  164.88    7.00 
   6   0  -4  174.08    8.00 
   6   0  -4  156.28    8.80 
   6   0  -4  168.98    6.40 
  -6   0   4  162.58    7.00 
  -6   0   4  159.48    7.00 
  -6   0   4  157.98    7.30 
  -6   0   4  161.98    7.10 
   5   0  -4   55.09    2.90 
   5   0  -4   53.99    2.70 
   5   0  -4   51.39    2.80 
   5   0  -4   54.99    4.50 
   5   0  -4   59.49    3.80 
   5   0  -4   57.09    2.80 
  -5   0   4   57.69    4.10 
  -5   0   4   57.09    3.10 
  -5   0   4   56.39    3.40 
  -5   0   4   57.69    3.50 
  -5   0   4   53.49    3.20 
  -5   0   4   50.69    3.20 
  -5   0   4   54.49    3.50 
   4   0  -4  938.41   31.70 
   4   0  -4  973.20   33.80 
   4   0  -4  961.50   31.50 
   4   0  -4  967.50   32.70 
  -4   0   4  914.11   32.50 
  -4   0   4  877.21   32.00 
  -4   0   4  835.22   32.50 
  -4   0   4  886.41   31.90 
  -4   0   4  947.51   32.80 
  -4   0   4  945.61   32.60 
  -4   0   4  938.51   32.20 
   3   0  -4  252.77    8.90 
   3   0  -4  256.67   10.30 
   3   0  -4  242.18    9.40 
   3   0  -4  229.38    8.60 
   3   0  -4  243.58    9.60 
  -3   0   4  239.58    9.20 
  -3   0   4  244.78    9.50 
  -3   0   4  258.77   12.20 
   2   0  -4   92.99    4.40 
   2   0  -4   93.19    4.10 
   2   0  -4   91.39    3.50 
  -2   0   4   87.39    5.60 
  -2   0   4   82.39    3.70 
   1   0  -4   88.99    3.40 
   1   0  -4   94.69    4.00 
   1   0  -4   96.09    3.50 
  -1   0   4   95.79    5.30 
   0   0  -4 5183.88  178.98 
   0   0   4 5245.58  180.18 
   0   0   4 5346.76  180.38 
   0   0   4 5444.96  187.18 
  -1   0  -4  534.95   19.20 
   1   0   4  576.94   19.90 
   1   0   4  582.44   19.40 
  -2   0  -4  929.01   30.60 
  -2   0  -4  894.21   30.50 
  -2   0  -4  827.22   29.80 
  -2   0  -4  824.52   29.90 
   2   0   4  876.11   30.50 
   2   0   4  942.91   30.80 
   2   0   4  897.81   30.10 
   2   0   4  913.01   30.90 
  -3   0  -4   95.09    4.40 
  -3   0  -4  113.49    4.60 
  -3   0  -4  122.29    5.00 
  -3   0  -4  126.39    5.00 
   3   0   4  104.79    4.20 
   3   0   4  107.69    4.90 
   3   0   4  107.49    4.10 
   3   0   4  106.39    5.20 
   3   0   4  101.79    4.80 
   3   0   4  100.59    4.40 
  -4   0  -4  499.15   18.00 
  -4   0  -4  544.25   19.00 
  -4   0  -4  508.75   18.50 
  -4   0  -4  537.15   19.00 
  -4   0  -4  485.15   18.50 
   4   0   4  517.25   18.50 
   4   0   4  531.95   19.10 
   4   0   4  536.05   17.90 
   4   0   4  525.15   18.90 
  -5   0  -4  380.46   14.10 
  -5   0  -4  405.96   15.00 
  -5   0  -4  419.26   15.50 
  -5   0  -4  398.96   15.50 
  -5   0  -4  412.96   15.30 
   5   0   4  377.76   14.40 
   5   0   4  404.66   14.10 
   5   0   4  404.56   14.90 
   5   0   4  408.86   15.70 
  -6   0  -4   61.99    4.20 
  -6   0  -4   59.59    2.80 
  -6   0  -4   68.39    4.00 
  -6   0  -4   67.59    3.30 
  -6   0  -4   62.79    3.90 
  -6   0  -4   62.59    4.20 
  -6   0  -4   63.69    4.00 
   6   0   4   54.19    2.90 
   6   0   4   60.09    3.20 
   6   0   4   62.29    3.60 
   6   0   4   60.29    4.40 
   6   0   4   60.99    3.70 
   6   0   4   58.79    3.20 
  -7   0  -4   89.69    5.00 
  -7   0  -4   83.59    4.10 
  -7   0  -4   80.29    4.90 
  -7   0  -4   78.09    5.20 
  -7   0  -4   85.39    4.90 
   7   0   4   86.79    4.30 
   7   0   4   82.49    4.80 
   7   0   4   87.59    4.80 
   7   0   4   80.79    5.50 
   7   0   4   86.29    4.30 
  -8   0  -4  377.96   14.30 
  -8   0  -4  364.76   14.30 
  -8   0  -4  368.66   13.60 
  -8   0  -4  352.36   14.40 
   8   0   4  360.06   13.70 
   8   0   4  380.96   14.40 
   8   0   4  377.76   13.70 
  -9   0  -4    6.10    1.40 
  -9   0  -4    6.40    1.30 
  -9   0  -4    4.90    1.00 
  -9   0  -4    8.10    1.60 
   9   0   4    3.50    1.00 
   9   0   4    4.10    1.40 
   9   0   4    3.40    0.90 
   8  -1  -4   15.80    1.40 
   8  -1  -4   12.20    2.30 
  -8   1   4   14.90    1.70 
  -8   1   4   13.50    1.80 
  -8   1   4   11.00    1.40 
   7  -1  -4  358.16   13.10 
   7  -1  -4  363.96   14.10 
   7  -1  -4  362.36   13.10 
  -7   1   4  349.57   13.20 
  -7   1   4  350.16   13.20 
  -7   1   4  348.07   13.40 
  -7   1   4  365.26   13.60 
  -7   1   4  335.47   13.00 
   6  -1  -4  110.19    4.60 
   6  -1  -4  107.19    5.10 
   6  -1  -4  118.59    5.10 
   6  -1  -4  107.69    6.00 
  -6   1   4  111.09    5.70 
  -6   1   4  112.39    5.20 
  -6   1   4  102.29    5.20 
  -6   1   4  109.49    5.30 
   5  -1  -4  528.35   21.10 
   5  -1  -4  539.05   18.50 
   5  -1  -4  508.95   18.70 
   5  -1  -4  545.85   19.90 
   5  -1  -4  518.25   18.80 
   5  -1  -4  532.25   18.40 
  -5   1   4  524.65   19.40 
  -5   1   4  515.35   18.90 
  -5   1   4  517.65   19.00 
  -5   1   4  533.05   20.00 
  -5   1   4  525.05   19.10 
  -5   1   4  514.15   20.30 
  -5   1   4  519.45   19.40 
   4  -1  -4  674.53   23.20 
   4  -1  -4  693.23   24.40 
   4  -1  -4  715.03   25.60 
   4  -1  -4  646.54   23.40 
   4  -1  -4  652.43   23.10 
   4  -1  -4  676.83   23.40 
   4  -1  -4  644.24   23.40 
  -4   1   4  673.73   23.70 
  -4   1   4  651.43   23.90 
  -4   1   4  705.93   24.90 
  -4   1   4  672.43   24.00 
  -4   1   4  688.23   24.50 
  -4   1   4  662.53   23.60 
  -4   1   4  674.23   24.60 
  -4   1   4  660.03   23.60 
   3  -1  -4   75.09    3.10 
   3  -1  -4   79.19    4.00 
   3  -1  -4   77.39    4.70 
   3  -1  -4   76.79    4.00 
   3  -1  -4   76.69    3.30 
  -3   1   4   83.99    4.40 
  -3   1   4   77.89    6.00 
  -3   1   4   75.79    3.90 
  -3   1   4   79.09    4.20 
   2  -1  -4  971.80   31.70 
   2  -1  -4  935.21   32.30 
   2  -1  -4  965.10   33.00 
  -2   1   4  842.12   31.90 
  -2   1   4  960.50   34.70 
  -2   1   4  950.20   32.60 
  -2   1   4  916.41   32.50 
   1  -1  -4 1607.84   51.39 
   1  -1  -4 1452.95   51.19 
   1  -1  -4 1588.24   51.89 
  -1   1   4 1552.54   53.49 
  -1   1   4 1451.65   51.89 
   0  -1  -4   49.80    2.10 
   0   1   4   55.39    3.30 
   0   1   4   51.79    2.50 
  -1  -1  -4 2784.22   97.89 
   1   1   4 3001.10   98.19 
  -2  -1  -4 2489.75   86.49 
  -2  -1  -4 2655.43   86.59 
   2   1   4 2516.95   86.79 
   2   1   4 2633.24   86.89 
   2   1   4 2593.04   86.49 
  -3  -1  -4 1089.19   38.40 
  -3  -1  -4 1163.88   38.70 
  -3  -1  -4 1133.69   38.60 
   3   1   4 1055.89   38.40 
   3   1   4 1137.79   38.40 
   3   1   4 1147.69   39.10 
   3   1   4 1168.58   38.90 
   3   1   4 1121.89   38.90 
   3   1   4 1141.49   38.00 
  -4  -1  -4  166.08    6.70 
  -4  -1  -4  149.39    6.30 
  -4  -1  -4  161.18    6.70 
   4   1   4  154.88    6.20 
   4   1   4  166.88    5.90
[truncated: 533,334 more chars]
