# Supplementary material for: Illuminating the dark conformational space of macrocycles using dominant rotors
Source: Springer Nature journal article supplement (doi:10.1038/s41557-020-00620-y), 2021-02-15
Supplement: 41557_2020_620_MOESM50_ESM.mol [file 41557_2020_620_MOESM50_ESM.mol]

nchem.20010080C-comp11b.mol
  ChemDraw12032023332D

 32 35  0  0  1  0  0  0  0  0999 V2000
   -3.3707    0.7990    0.0000 C   0  0  0  0  0  0  0  0  0  0  0  0
   -3.4235   -0.0241    0.0000 C   0  0  0  0  0  0  0  0  0  0  0  0
   -2.7368   -0.4819    0.0000 C   0  0  0  0  0  0  0  0  0  0  0  0
   -1.9980   -0.1155    0.0000 C   0  0  0  0  0  0  0  0  0  0  0  0
   -1.9451    0.7075    0.0000 C   0  0  0  0  0  0  0  0  0  0  0  0
   -2.6311    1.1646    0.0000 C   0  0  0  0  0  0  0  0  0  0  0  0
   -1.7312   -0.8967    0.0000 C   0  0  0  0  0  0  0  0  0  0  0  0
   -1.5810    1.4478    0.0000 N   0  0  0  0  0  0  0  0  0  0  0  0
   -0.9614    1.9927    0.0000 C   0  0  0  0  0  0  0  0  0  0  0  0
   -1.2879    2.7505    0.0000 N   0  0  0  0  0  0  0  0  0  0  0  0
   -2.1099    2.6736    0.0000 N   0  0  0  0  0  0  0  0  0  0  0  0
   -2.2910    1.8684    0.0000 C   0  0  0  0  0  0  0  0  0  0  0  0
   -3.0481    1.5418    0.0000 H   0  0  0  0  0  0  0  0  0  0  0  0
   -1.1862   -1.5163    0.0000 N   0  0  0  0  0  0  0  0  0  0  0  0
   -2.4503   -1.3005    0.0000 O   0  0  0  0  0  0  0  0  0  0  0  0
   -0.4460   -1.8801    0.0000 C   0  0  0  0  0  0  0  0  0  0  0  0
    0.3778   -1.9329    0.0000 C   0  0  0  0  0  0  0  0  0  0  0  0
    1.1578   -1.6665    0.0000 N   0  0  0  0  0  0  0  0  0  0  0  0
    0.4857   -2.7505    0.0000 O   0  0  0  0  0  0  0  0  0  0  0  0
   -0.1806    2.2588    0.0000 C   0  0  0  0  0  0  0  0  0  0  0  0
    0.6421    2.2059    0.0000 N   0  0  0  0  0  0  0  0  0  0  0  0
    1.7778   -1.1219    0.0000 C   0  0  0  0  0  0  0  0  0  0  0  0
    2.2367   -1.8072    0.0000 C   0  0  0  0  0  0  0  0  0  0  0  0
    3.0601   -1.7521    0.0000 C   0  0  0  0  0  0  0  0  0  0  0  0
    3.4235   -1.0115    0.0000 C   0  0  0  0  0  0  0  0  0  0  0  0
    2.9646   -0.3262    0.0000 C   0  0  0  0  0  0  0  0  0  0  0  0
    2.1412   -0.3813    0.0000 C   0  0  0  0  0  0  0  0  0  0  0  0
    2.1941    0.4421    0.0000 C   0  0  0  0  0  0  0  0  0  0  0  0
    1.9280    1.2225    0.0000 C   0  0  0  0  0  0  0  0  0  0  0  0
    1.3831    1.8422    0.0000 C   0  0  0  0  0  0  0  0  0  0  0  0
    1.8843    2.4975    0.0000 O   0  0  0  0  0  0  0  0  0  0  0  0
   -0.6585   -2.6787    0.0000 C   0  0  0  0  0  0  0  0  0  0  0  0
  1  2  2  0      
  2  3  1  0      
  3  4  2  0      
  4  5  1  0      
  5  6  2  0      
  6  1  1  0      
  4  7  1  0      
  8  5  1  0      
  8  9  1  0      
  9 10  2  0      
 10 11  1  0      
 11 12  2  0      
 12  8  1  0      
 12 13  1  0      
  7 14  1  0      
  7 15  2  0      
 14 16  1  0      
 16 17  1  0      
 17 18  1  0      
 17 19  2  0      
  9 20  1  0      
 20 21  1  0      
 18 22  1  0      
 22 23  2  0      
 23 24  1  0      
 24 25  2  0      
 25 26  1  0      
 26 27  2  0      
 27 22  1  0      
 27 28  1  0      
 28 29  1  0      
 29 30  1  0      
 30 31  2  0      
 30 21  1  0      
 16 32  1  6      
M  END
