# Supplementary material for: Illuminating the dark conformational space of macrocycles using dominant rotors
Source: Springer Nature journal article supplement (doi:10.1038/s41557-020-00620-y), 2021-02-15
Supplement: 41557_2020_620_MOESM52_ESM.cif [file 41557_2020_620_MOESM52_ESM.cif]

####################################################################### 
# 
# This file contains crystal structure data downloaded from the 
# Cambridge Structural Database (CSD) hosted by the Cambridge 
# Crystallographic Data Centre (CCDC).
# 
# Full information about CCDC data access policies and citation 
# guidelines are available at http://www.ccdc.cam.ac.uk/access/V1 
# 
# Audit and citation data items may have been added by the CCDC. 
# Please retain this information to preserve the provenance of 
# this file and to allow appropriate attribution of the data. 
# 
#######################################################################

data_d18116_a
_database_code_depnum_ccdc_archive 'CCDC 1956026'
loop_
_audit_author_name
_audit_author_address
'Alan Lough'
;University of Toronto
Canada
;
_audit_update_record             
;
2019-09-26 deposited with the CCDC.	2020-01-17 downloaded from the CCDC.
;

_audit_creation_method           SHELXL-2016/6
_shelx_SHELXL_version_number     2016/6
_chemical_name_systematic        ?
_chemical_name_common            ?
_chemical_melting_point          ?
_chemical_formula_moiety         'C23 H24 N6 O3'
_chemical_formula_sum            'C23 H24 N6 O3'
_chemical_formula_weight         432.48

loop_
_atom_type_symbol
_atom_type_description
_atom_type_scat_dispersion_real
_atom_type_scat_dispersion_imag
_atom_type_scat_source
C C 0.0181 0.0091 'International Tables Vol C Tables 4.2.6.8 and 6.1.1.4'
H H 0.0000 0.0000 'International Tables Vol C Tables 4.2.6.8 and 6.1.1.4'
N N 0.0311 0.0180 'International Tables Vol C Tables 4.2.6.8 and 6.1.1.4'
O O 0.0492 0.0322 'International Tables Vol C Tables 4.2.6.8 and 6.1.1.4'

_space_group_crystal_system      triclinic
_space_group_IT_number           1
_space_group_name_H-M_alt        'P 1'
_space_group_name_Hall           'P 1'

_shelx_space_group_comment       
; 
The symmetry employed for this shelxl refinement is uniquely defined 
by the following loop, which should always be used as a source of 
symmetry information in preference to the above space-group names. 
They are only intended as comments. 
;

loop_
_space_group_symop_operation_xyz
'x, y, z'

_cell_length_a                   9.4853(2)
_cell_length_b                   9.6442(2)
_cell_length_c                   13.9176(3)
_cell_angle_alpha                74.7210(10)
_cell_angle_beta                 71.3390(10)
_cell_angle_gamma                61.4390(10)
_cell_volume                     1050.05(4)
_cell_formula_units_Z            2
_cell_measurement_temperature    150(2)
_cell_measurement_reflns_used    9920
_cell_measurement_theta_min      3.38
_cell_measurement_theta_max      66.81

_exptl_crystal_description       Block
_exptl_crystal_colour            colourless
_exptl_crystal_density_meas      ?
_exptl_crystal_density_method    ?
_exptl_crystal_density_diffrn    1.368
_exptl_crystal_F_000             456
_exptl_transmission_factor_min   ?
_exptl_transmission_factor_max   ?
_exptl_crystal_size_max          0.200
_exptl_crystal_size_mid          0.170
_exptl_crystal_size_min          0.110
_exptl_absorpt_coefficient_mu    0.768
_shelx_estimated_absorpt_T_min   0.862
_shelx_estimated_absorpt_T_max   0.920
_exptl_absorpt_correction_type   multi-scan
_exptl_absorpt_correction_T_min  0.6896
_exptl_absorpt_correction_T_max  0.7529
_exptl_absorpt_process_details   'SADABS (Bruker, 2014)'
_exptl_absorpt_special_details   ?
_diffrn_ambient_temperature      150(2)
_diffrn_radiation_wavelength     1.54178
_diffrn_radiation_type           CuK\a
_diffrn_source                   'Bruker ImuS with multi-layer optics'
_diffrn_measurement_device_type  'Bruker Kappa APEX-DUO CCD'
_diffrn_measurement_method       '\f and \w scans'
_diffrn_detector_area_resol_mean ?
_diffrn_reflns_number            35685
_diffrn_reflns_av_unetI/netI     0.0202
_diffrn_reflns_av_R_equivalents  0.0294
_diffrn_reflns_limit_h_min       -11
_diffrn_reflns_limit_h_max       11
_diffrn_reflns_limit_k_min       -11
_diffrn_reflns_limit_k_max       11
_diffrn_reflns_limit_l_min       -16
_diffrn_reflns_limit_l_max       16
_diffrn_reflns_theta_min         3.382
_diffrn_reflns_theta_max         67.139
_diffrn_reflns_theta_full        67.139
_diffrn_measured_fraction_theta_max 0.987
_diffrn_measured_fraction_theta_full 0.987
_diffrn_reflns_Laue_measured_fraction_max 0.987
_diffrn_reflns_Laue_measured_fraction_full 0.987
_diffrn_reflns_point_group_measured_fraction_max 0.953
_diffrn_reflns_point_group_measured_fraction_full 0.953
_reflns_number_total             7168
_reflns_number_gt                7090
_reflns_threshold_expression     'I > 2\s(I)'
_reflns_Friedel_coverage         0.931
_reflns_Friedel_fraction_max     0.919
_reflns_Friedel_fraction_full    0.919

_reflns_special_details          
; 
 Reflections were merged by SHELXL according to the crystal 
 class for the calculation of statistics and refinement. 
  
 _reflns_Friedel_fraction is defined as the number of unique 
 Friedel pairs measured divided by the number that would be 
 possible theoretically, ignoring centric projections and 
 systematic absences. 
;

_computing_data_collection       'APEX2 (Bruker, 2014)'
_computing_cell_refinement       APEX2
_computing_data_reduction        'SAINT (Bruker, 2014)'
_computing_structure_solution    'SHELXT (Sheldrick, 2015)'
_computing_structure_refinement  'SHELXL-2016/6 (Sheldrick, 2016)'
_computing_molecular_graphics    'PLATON (Spek, 2009)'
_computing_publication_material  'SHELXTL (Sheldrick, 2008)'
_refine_special_details          ?
_refine_ls_structure_factor_coef Fsqd
_refine_ls_matrix_type           full
_refine_ls_weighting_scheme      calc
_refine_ls_weighting_details     
'w=1/[\s^2^(Fo^2^)+(0.0309P)^2^+0.1724P] where P=(Fo^2^+2Fc^2^)/3'
_atom_sites_solution_primary     ?
_atom_sites_solution_secondary   ?
_atom_sites_solution_hydrogens   mixed
_refine_ls_hydrogen_treatment    mixed
_refine_ls_extinction_method     none
_refine_ls_extinction_coef       .
_refine_ls_abs_structure_details 
; 
 Flack x determined using 3361 quotients [(I+)-(I-)]/[(I+)+(I-)] 
 (Parsons, Flack and Wagner, Acta Cryst. B69 (2013) 249-259). 
;
_refine_ls_abs_structure_Flack   0.06(3)
_chemical_absolute_configuration ad
_refine_ls_number_reflns         7168
_refine_ls_number_parameters     605
_refine_ls_number_restraints     3
_refine_ls_R_factor_all          0.0231
_refine_ls_R_factor_gt           0.0227
_refine_ls_wR_factor_ref         0.0579
_refine_ls_wR_factor_gt          0.0572
_refine_ls_goodness_of_fit_ref   1.048
_refine_ls_restrained_S_all      1.048
_refine_ls_shift/su_max          0.000
_refine_ls_shift/su_mean         0.000

loop_
_atom_site_label
_atom_site_type_symbol
_atom_site_fract_x
_atom_site_fract_y
_atom_site_fract_z
_atom_site_U_iso_or_equiv
_atom_site_adp_type
_atom_site_occupancy
_atom_site_site_symmetry_order
_atom_site_calc_flag
_atom_site_refinement_flags_posn
_atom_site_refinement_flags_adp
_atom_site_refinement_flags_occupancy
_atom_site_disorder_assembly
_atom_site_disorder_group
O1A O 0.70609(16) 0.14138(15) 0.72267(11) 0.0233(3) Uani 1 1 d . . . . .
O2A O 0.24452(17) 0.67517(15) 0.77890(11) 0.0245(3) Uani 1 1 d . . . . .
O3A O 0.25821(17) 0.28549(16) 0.77867(10) 0.0250(3) Uani 1 1 d . . . . .
N1A N 0.8995(2) -0.08063(19) 0.78559(13) 0.0234(4) Uani 1 1 d . . . . .
N2A N 0.4953(2) 0.45793(18) 0.75827(12) 0.0193(3) Uani 1 1 d . . . . .
N3A N 0.4024(2) 0.36009(18) 0.62739(13) 0.0178(3) Uani 1 1 d . . . . .
N4A N 0.5006(2) -0.06315(18) 0.82289(12) 0.0189(3) Uani 1 1 d . . . . .
N5A N 0.6042(2) -0.10638(19) 0.95358(12) 0.0218(3) Uani 1 1 d . . . . .
N6A N 0.4346(2) -0.05842(19) 0.98882(12) 0.0225(3) Uani 1 1 d . . . . .
C1A C 0.8111(2) -0.1703(2) 0.78915(15) 0.0228(4) Uani 1 1 d . . . . .
H1AA H 0.874021 -0.283101 0.815050 0.027 Uiso 1 1 calc R U . . .
H1AB H 0.804623 -0.166205 0.718804 0.027 Uiso 1 1 calc R U . . .
C2A C 0.8406(2) 0.0737(2) 0.74620(15) 0.0209(4) Uani 1 1 d . . . . .
C3A C 0.9474(2) 0.1569(2) 0.73148(18) 0.0274(4) Uani 1 1 d . . . . .
H3AA H 1.041126 0.121030 0.672048 0.033 Uiso 1 1 calc R U . . .
H3AB H 0.993129 0.125290 0.792697 0.033 Uiso 1 1 calc R U . . .
C4A C 0.8545(2) 0.3390(2) 0.71391(15) 0.0227(4) Uani 1 1 d . . . . .
H4AA H 0.935701 0.384665 0.686711 0.027 Uiso 1 1 calc R U . . .
H4AB H 0.790902 0.369465 0.661578 0.027 Uiso 1 1 calc R U . . .
C5A C 0.7378(2) 0.4103(2) 0.81000(15) 0.0202(4) Uani 1 1 d . . . . .
C6A C 0.8055(3) 0.4257(2) 0.88037(15) 0.0243(4) Uani 1 1 d . . . . .
H6AA H 0.921966 0.382893 0.869101 0.029 Uiso 1 1 calc R U . . .
C7A C 0.7075(3) 0.5013(2) 0.96565(16) 0.0268(4) Uani 1 1 d . . . . .
H7AA H 0.756032 0.510880 1.012200 0.032 Uiso 1 1 calc R U . . .
C8A C 0.5379(3) 0.5631(2) 0.98249(15) 0.0260(4) Uani 1 1 d . . . . .
H8AA H 0.469663 0.617668 1.040045 0.031 Uiso 1 1 calc R U . . .
C9A C 0.4669(3) 0.5460(2) 0.91623(15) 0.0224(4) Uani 1 1 d . . . . .
H9AA H 0.350369 0.586404 0.929620 0.027 Uiso 1 1 calc R U . . .
C10A C 0.5651(2) 0.4701(2) 0.83010(14) 0.0193(4) Uani 1 1 d . . . . .
C11A C 0.3480(2) 0.5597(2) 0.73464(14) 0.0183(4) Uani 1 1 d . . . . .
C12A C 0.3269(2) 0.5290(2) 0.63848(14) 0.0190(4) Uani 1 1 d . . . . .
H12A H 0.389234 0.577688 0.579202 0.023 Uiso 1 1 calc R U . . .
C13A C 0.1503(3) 0.6124(2) 0.62683(17) 0.0282(5) Uani 1 1 d . . . . .
H13A H 0.107230 0.726766 0.628364 0.042 Uiso 1 1 calc R U . . .
H13B H 0.082848 0.569024 0.683103 0.042 Uiso 1 1 calc R U . . .
H13C H 0.146711 0.595236 0.561474 0.042 Uiso 1 1 calc R U . . .
C14A C 0.3546(2) 0.2550(2) 0.69541(14) 0.0177(4) Uani 1 1 d . . . . .
C15A C 0.4263(2) 0.0952(2) 0.65879(14) 0.0179(4) Uani 1 1 d . . . . .
C16A C 0.4283(2) 0.0920(2) 0.55837(14) 0.0219(4) Uani 1 1 d . . . . .
H16A H 0.382994 0.189866 0.516135 0.026 Uiso 1 1 calc R U . . .
C17A C 0.4941(3) -0.0493(2) 0.51877(15) 0.0252(4) Uani 1 1 d . . . . .
H17A H 0.494284 -0.047692 0.450196 0.030 Uiso 1 1 calc R U . . .
C18A C 0.5600(3) -0.1933(2) 0.57945(16) 0.0247(4) Uani 1 1 d . . . . .
H18A H 0.606124 -0.291020 0.552847 0.030 Uiso 1 1 calc R U . . .
C19A C 0.5575(3) -0.1928(2) 0.67948(15) 0.0239(4) Uani 1 1 d . . . . .
H19A H 0.602693 -0.291171 0.721272 0.029 Uiso 1 1 calc R U . . .
C20A C 0.4905(2) -0.0516(2) 0.71965(14) 0.0185(4) Uani 1 1 d . . . . .
C21A C 0.3763(2) -0.0360(2) 0.91010(14) 0.0202(4) Uani 1 1 d . . . . .
C22A C 0.6407(2) -0.1098(2) 0.85531(14) 0.0196(4) Uani 1 1 d . . . . .
C23A C 0.2049(3) -0.0011(3) 0.91434(16) 0.0269(4) Uani 1 1 d . . . . .
H23A H 0.205868 -0.072450 0.875109 0.040 Uiso 1 1 calc R U . . .
H23B H 0.147665 0.109688 0.885022 0.040 Uiso 1 1 calc R U . . .
H23C H 0.147618 -0.017448 0.985689 0.040 Uiso 1 1 calc R U . . .
O1B O 0.49254(16) 0.65197(15) 0.21871(10) 0.0220(3) Uani 1 1 d . . . . .
O2B O 0.33600(17) 1.19447(15) 0.29426(11) 0.0239(3) Uani 1 1 d . . . . .
O3B O 0.74491(17) 0.77065(16) 0.29591(10) 0.0242(3) Uani 1 1 d . . . . .
N1B N 0.4681(2) 0.42268(19) 0.27180(13) 0.0224(4) Uani 1 1 d . . . . .
N2B N 0.34527(19) 0.96723(18) 0.26579(12) 0.0176(3) Uani 1 1 d . . . . .
N3B N 0.66586(19) 0.88217(18) 0.14671(12) 0.0164(3) Uani 1 1 d . . . . .
N4B N 0.81685(19) 0.43168(17) 0.31660(11) 0.0169(3) Uani 1 1 d . . . . .
N5B N 0.6302(2) 0.38232(18) 0.44217(12) 0.0216(3) Uani 1 1 d . . . . .
N6B N 0.7190(2) 0.42412(18) 0.48288(12) 0.0208(3) Uani 1 1 d . . . . .
C1B C 0.6416(2) 0.3354(2) 0.27192(15) 0.0218(4) Uani 1 1 d . . . . .
H1BA H 0.706887 0.349772 0.201752 0.026 Uiso 1 1 calc R U . . .
H1BB H 0.668841 0.220509 0.291100 0.026 Uiso 1 1 calc R U . . .
C2B C 0.4069(2) 0.5796(2) 0.23911(14) 0.0199(4) Uani 1 1 d . . . . .
C3B C 0.2325(2) 0.6586(2) 0.22489(17) 0.0251(4) Uani 1 1 d . . . . .
H3BA H 0.161706 0.625021 0.286277 0.030 Uiso 1 1 calc R U . . .
H3BB H 0.230835 0.621386 0.165568 0.030 Uiso 1 1 calc R U . . .
C4B C 0.1602(2) 0.8406(2) 0.20751(15) 0.0220(4) Uani 1 1 d . . . . .
H4BA H 0.244242 0.873478 0.158575 0.026 Uiso 1 1 calc R U . . .
H4BB H 0.064745 0.883341 0.176215 0.026 Uiso 1 1 calc R U . . .
C5B C 0.1052(2) 0.9125(2) 0.30462(15) 0.0189(4) Uani 1 1 d . . . . .
C6B C -0.0438(2) 0.9205(2) 0.37126(16) 0.0233(4) Uani 1 1 d . . . . .
H6BA H -0.103775 0.877972 0.354632 0.028 Uiso 1 1 calc R U . . .
C7B C -0.1064(3) 0.9884(2) 0.46036(17) 0.0269(4) Uani 1 1 d . . . . .
H7BA H -0.208205 0.992921 0.504172 0.032 Uiso 1 1 calc R U . . .
C8B C -0.0187(3) 1.0498(2) 0.48509(16) 0.0266(4) Uani 1 1 d . . . . .
H8BA H -0.061564 1.098033 0.545803 0.032 Uiso 1 1 calc R U . . .
C9B C 0.1302(2) 1.0414(2) 0.42227(15) 0.0222(4) Uani 1 1 d . . . . .
H9BA H 0.190169 1.082024 0.440703 0.027 Uiso 1 1 calc R U . . .
C10B C 0.1935(2) 0.9734(2) 0.33170(14) 0.0175(4) Uani 1 1 d . . . . .
C11B C 0.4067(2) 1.0726(2) 0.25166(14) 0.0169(4) Uani 1 1 d . . . . .
C12B C 0.5742(2) 1.0406(2) 0.17783(14) 0.0182(4) Uani 1 1 d . . . . .
H12B H 0.642760 1.052848 0.213732 0.022 Uiso 1 1 calc R U . . .
C13B C 0.5539(3) 1.1675(2) 0.08394(16) 0.0285(5) Uani 1 1 d . . . . .
H13D H 0.488112 1.273441 0.106035 0.043 Uiso 1 1 calc R U . . .
H13E H 0.497933 1.151839 0.042323 0.043 Uiso 1 1 calc R U . . .
H13F H 0.662717 1.158750 0.043280 0.043 Uiso 1 1 calc R U . . .
C14B C 0.7543(2) 0.7592(2) 0.20798(14) 0.0163(4) Uani 1 1 d . . . . .
C15B C 0.8740(2) 0.6101(2) 0.15982(14) 0.0161(4) Uani 1 1 d . . . . .
C16B C 0.9617(2) 0.6220(2) 0.05858(14) 0.0192(4) Uani 1 1 d . . . . .
H16B H 0.942001 0.724615 0.020754 0.023 Uiso 1 1 calc R U . . .
C17B C 1.0769(2) 0.4881(2) 0.01154(15) 0.0228(4) Uani 1 1 d . . . . .
H17B H 1.134371 0.499391 -0.057683 0.027 Uiso 1 1 calc R U . . .
C18B C 1.1077(2) 0.3379(2) 0.06617(15) 0.0233(4) Uani 1 1 d . . . . .
H18B H 1.186105 0.245656 0.034564 0.028 Uiso 1 1 calc R U . . .
C19B C 1.0233(2) 0.3229(2) 0.16717(15) 0.0219(4) Uani 1 1 d . . . . .
H19B H 1.044866 0.219918 0.204733 0.026 Uiso 1 1 calc R U . . .
C20B C 0.9079(2) 0.4566(2) 0.21401(13) 0.0172(4) Uani 1 1 d . . . . .
C21B C 0.8309(2) 0.4505(2) 0.40750(14) 0.0185(4) Uani 1 1 d . . . . .
C22B C 0.6911(2) 0.3865(2) 0.34383(14) 0.0184(4) Uani 1 1 d . . . . .
C23B C 0.9632(3) 0.4819(2) 0.41822(15) 0.0232(4) Uani 1 1 d . . . . .
H23D H 1.068855 0.415991 0.376372 0.035 Uiso 1 1 calc R U . . .
H23E H 0.969706 0.455910 0.490119 0.035 Uiso 1 1 calc R U . . .
H23F H 0.938478 0.594668 0.395278 0.035 Uiso 1 1 calc R U . . .
H1NA H 1.000(3) -0.132(3) 0.7871(18) 0.024(6) Uiso 1 1 d . . . . .
H2NA H 0.560(3) 0.373(3) 0.7225(17) 0.019(5) Uiso 1 1 d . . . . .
H3NA H 0.480(3) 0.326(3) 0.5708(19) 0.025(6) Uiso 1 1 d . . . . .
H1NB H 0.412(3) 0.369(3) 0.2789(19) 0.028(6) Uiso 1 1 d . . . . .
H2NB H 0.404(3) 0.889(3) 0.2338(17) 0.019(5) Uiso 1 1 d . . . . .
H3NB H 0.671(3) 0.871(2) 0.0888(18) 0.013(5) Uiso 1 1 d . . . . .

loop_
_atom_site_aniso_label
_atom_site_aniso_U_11
_atom_site_aniso_U_22
_atom_site_aniso_U_33
_atom_site_aniso_U_23
_atom_site_aniso_U_13
_atom_site_aniso_U_12
O1A 0.0185(7) 0.0194(6) 0.0315(7) -0.0034(5) -0.0113(6) -0.0043(5)
O2A 0.0196(7) 0.0207(7) 0.0276(7) -0.0088(6) -0.0058(6) -0.0011(6)
O3A 0.0249(7) 0.0244(7) 0.0198(7) -0.0045(5) 0.0015(6) -0.0093(6)
N1A 0.0168(9) 0.0216(9) 0.0264(9) -0.0033(7) -0.0077(7) -0.0023(7)
N2A 0.0177(8) 0.0169(8) 0.0227(8) -0.0060(6) -0.0065(7) -0.0043(6)
N3A 0.0167(8) 0.0161(7) 0.0176(8) -0.0037(6) -0.0019(7) -0.0052(6)
N4A 0.0203(8) 0.0189(8) 0.0148(7) -0.0013(6) -0.0040(6) -0.0068(6)
N5A 0.0203(8) 0.0208(8) 0.0203(8) -0.0029(6) -0.0055(7) -0.0052(6)
N6A 0.0242(9) 0.0220(8) 0.0181(8) -0.0025(6) -0.0050(7) -0.0076(7)
C1A 0.0209(10) 0.0187(9) 0.0237(10) -0.0041(7) -0.0047(8) -0.0040(8)
C2A 0.0167(9) 0.0226(10) 0.0206(9) -0.0074(7) -0.0048(8) -0.0038(8)
C3A 0.0187(10) 0.0261(10) 0.0394(12) -0.0117(9) -0.0097(9) -0.0057(8)
C4A 0.0193(10) 0.0265(10) 0.0253(10) -0.0041(8) -0.0059(8) -0.0114(8)
C5A 0.0236(10) 0.0152(9) 0.0238(10) -0.0001(7) -0.0089(8) -0.0090(8)
C6A 0.0283(11) 0.0211(10) 0.0281(11) -0.0005(8) -0.0123(9) -0.0121(8)
C7A 0.0373(12) 0.0262(11) 0.0260(10) 0.0008(8) -0.0158(9) -0.0176(9)
C8A 0.0343(12) 0.0244(10) 0.0203(10) -0.0035(8) -0.0050(9) -0.0139(9)
C9A 0.0247(10) 0.0208(9) 0.0218(10) -0.0016(8) -0.0047(8) -0.0109(8)
C10A 0.0244(10) 0.0154(9) 0.0205(9) 0.0024(7) -0.0094(8) -0.0103(8)
C11A 0.0172(9) 0.0160(9) 0.0198(9) -0.0008(7) -0.0040(8) -0.0066(7)
C12A 0.0192(10) 0.0158(9) 0.0195(9) -0.0017(7) -0.0054(8) -0.0052(7)
C13A 0.0240(11) 0.0252(10) 0.0324(11) -0.0079(8) -0.0131(9) -0.0022(8)
C14A 0.0165(9) 0.0179(9) 0.0171(9) -0.0017(7) -0.0066(8) -0.0047(7)
C15A 0.0157(9) 0.0207(9) 0.0183(9) -0.0032(7) -0.0029(8) -0.0088(7)
C16A 0.0239(10) 0.0231(9) 0.0190(10) -0.0004(8) -0.0073(8) -0.0100(8)
C17A 0.0282(11) 0.0323(11) 0.0209(10) -0.0071(8) -0.0067(9) -0.0152(9)
C18A 0.0295(11) 0.0224(10) 0.0261(10) -0.0090(8) -0.0041(9) -0.0128(8)
C19A 0.0273(11) 0.0195(9) 0.0242(10) -0.0009(8) -0.0058(9) -0.0107(8)
C20A 0.0204(9) 0.0197(9) 0.0155(9) -0.0012(7) -0.0036(8) -0.0097(8)
C21A 0.0216(10) 0.0178(9) 0.0181(9) -0.0008(7) -0.0034(8) -0.0076(8)
C22A 0.0215(10) 0.0146(9) 0.0193(9) -0.0006(7) -0.0059(8) -0.0051(7)
C23A 0.0233(11) 0.0313(11) 0.0233(10) 0.0007(8) -0.0054(9) -0.0116(9)
O1B 0.0223(7) 0.0194(6) 0.0287(7) -0.0046(5) -0.0032(6) -0.0133(6)
O2B 0.0250(7) 0.0183(7) 0.0302(7) -0.0096(5) 0.0003(6) -0.0115(6)
O3B 0.0326(8) 0.0223(7) 0.0192(7) -0.0052(5) -0.0077(6) -0.0106(6)
N1B 0.0267(9) 0.0203(8) 0.0273(9) -0.0036(7) -0.0055(7) -0.0158(7)
N2B 0.0172(8) 0.0154(8) 0.0207(8) -0.0052(6) -0.0007(7) -0.0083(6)
N3B 0.0187(8) 0.0166(8) 0.0153(8) -0.0031(6) -0.0041(6) -0.0080(6)
N4B 0.0206(8) 0.0159(7) 0.0138(7) -0.0014(6) -0.0022(6) -0.0090(6)
N5B 0.0254(9) 0.0220(8) 0.0192(8) -0.0041(6) -0.0017(7) -0.0131(7)
N6B 0.0244(9) 0.0223(8) 0.0173(8) -0.0038(6) -0.0020(7) -0.0124(7)
C1B 0.0264(10) 0.0193(9) 0.0232(10) -0.0063(7) -0.0046(8) -0.0114(8)
C2B 0.0224(10) 0.0230(10) 0.0195(9) -0.0079(7) -0.0002(8) -0.0140(8)
C3B 0.0212(10) 0.0255(10) 0.0346(11) -0.0105(8) -0.0016(9) -0.0145(8)
C4B 0.0199(9) 0.0254(10) 0.0241(10) -0.0033(8) -0.0051(8) -0.0124(8)
C5B 0.0165(9) 0.0147(9) 0.0239(10) 0.0002(7) -0.0057(8) -0.0061(7)
C6B 0.0180(10) 0.0203(9) 0.0308(11) 0.0010(8) -0.0060(9) -0.0094(8)
C7B 0.0187(10) 0.0249(10) 0.0306(11) -0.0014(8) 0.0017(9) -0.0100(8)
C8B 0.0268(11) 0.0241(10) 0.0228(10) -0.0053(8) 0.0010(9) -0.0092(8)
C9B 0.0232(10) 0.0217(10) 0.0223(10) -0.0030(7) -0.0044(8) -0.0106(8)
C10B 0.0154(9) 0.0136(8) 0.0209(9) 0.0009(7) -0.0042(8) -0.0057(7)
C11B 0.0197(9) 0.0135(8) 0.0183(9) 0.0001(7) -0.0065(8) -0.0075(7)
C12B 0.0201(9) 0.0160(9) 0.0211(9) -0.0033(7) -0.0031(8) -0.0104(7)
C13B 0.0358(12) 0.0163(9) 0.0282(11) -0.0015(8) 0.0003(9) -0.0125(9)
C14B 0.0177(9) 0.0176(9) 0.0172(9) -0.0014(7) -0.0028(7) -0.0114(7)
C15B 0.0155(9) 0.0205(9) 0.0148(8) -0.0020(7) -0.0037(7) -0.0097(7)
C16B 0.0186(9) 0.0230(9) 0.0165(9) 0.0001(7) -0.0038(8) -0.0110(8)
C17B 0.0180(9) 0.0322(11) 0.0169(9) -0.0046(8) -0.0007(8) -0.0112(8)
C18B 0.0172(9) 0.0263(10) 0.0222(10) -0.0101(8) -0.0010(8) -0.0050(8)
C19B 0.0227(10) 0.0173(9) 0.0221(10) -0.0027(7) -0.0059(8) -0.0053(8)
C20B 0.0186(9) 0.0204(9) 0.0133(9) -0.0013(7) -0.0030(7) -0.0098(8)
C21B 0.0228(10) 0.0165(9) 0.0152(9) -0.0019(7) -0.0035(8) -0.0084(7)
C22B 0.0216(10) 0.0150(8) 0.0191(9) -0.0024(7) -0.0037(8) -0.0089(7)
C23B 0.0256(10) 0.0264(10) 0.0201(9) -0.0014(8) -0.0057(8) -0.0137(8)

_geom_special_details            
; 
 All esds (except the esd in the dihedral angle between two l.s. planes) 
 are estimated using the full covariance matrix.  The cell esds are taken 
 into account individually in the estimation of esds in distances, angles 
 and torsion angles; correlations between esds in cell parameters are only 
 used when they are defined by crystal symmetry.  An approximate (isotropic) 
 treatment of cell esds is used for estimating esds involving l.s. planes. 
;

loop_
_geom_bond_atom_site_label_1
_geom_bond_atom_site_label_2
_geom_bond_distance
_geom_bond_site_symmetry_2
_geom_bond_publ_flag
O1A C2A 1.232(2) . ?
O2A C11A 1.230(2) . ?
O3A C14A 1.229(2) . ?
N1A C2A 1.341(3) . ?
N1A C1A 1.448(3) . ?
N1A H1NA 0.84(3) . ?
N2A C11A 1.356(2) . ?
N2A C10A 1.418(2) . ?
N2A H2NA 0.92(2) . ?
N3A C14A 1.337(3) . ?
N3A C12A 1.462(2) . ?
N3A H3NA 0.90(3) . ?
N4A C22A 1.371(3) . ?
N4A C21A 1.374(3) . ?
N4A C20A 1.442(2) . ?
N5A C22A 1.304(2) . ?
N5A N6A 1.395(2) . ?
N6A C21A 1.304(3) . ?
C1A C22A 1.493(3) . ?
C1A H1AA 0.9900 . ?
C1A H1AB 0.9900 . ?
C2A C3A 1.507(3) . ?
C3A C4A 1.534(3) . ?
C3A H3AA 0.9900 . ?
C3A H3AB 0.9900 . ?
C4A C5A 1.515(3) . ?
C4A H4AA 0.9900 . ?
C4A H4AB 0.9900 . ?
C5A C6A 1.402(3) . ?
C5A C10A 1.408(3) . ?
C6A C7A 1.381(3) . ?
C6A H6AA 0.9500 . ?
C7A C8A 1.383(3) . ?
C7A H7AA 0.9500 . ?
C8A C9A 1.384(3) . ?
C8A H8AA 0.9500 . ?
C9A C10A 1.392(3) . ?
C9A H9AA 0.9500 . ?
C11A C12A 1.535(2) . ?
C12A C13A 1.515(3) . ?
C12A H12A 1.0000 . ?
C13A H13A 0.9800 . ?
C13A H13B 0.9800 . ?
C13A H13C 0.9800 . ?
C14A C15A 1.512(3) . ?
C15A C16A 1.400(3) . ?
C15A C20A 1.402(3) . ?
C16A C17A 1.383(3) . ?
C16A H16A 0.9500 . ?
C17A C18A 1.386(3) . ?
C17A H17A 0.9500 . ?
C18A C19A 1.386(3) . ?
C18A H18A 0.9500 . ?
C19A C20A 1.384(3) . ?
C19A H19A 0.9500 . ?
C21A C23A 1.478(3) . ?
C23A H23A 0.9800 . ?
C23A H23B 0.9800 . ?
C23A H23C 0.9800 . ?
O1B C2B 1.232(2) . ?
O2B C11B 1.241(2) . ?
O3B C14B 1.229(2) . ?
N1B C2B 1.342(3) . ?
N1B C1B 1.447(3) . ?
N1B H1NB 0.88(3) . ?
N2B C11B 1.342(2) . ?
N2B C10B 1.421(2) . ?
N2B H2NB 0.83(2) . ?
N3B C14B 1.345(2) . ?
N3B C12B 1.454(2) . ?
N3B H3NB 0.82(2) . ?
N4B C22B 1.370(2) . ?
N4B C21B 1.380(2) . ?
N4B C20B 1.439(2) . ?
N5B C22B 1.302(2) . ?
N5B N6B 1.394(2) . ?
N6B C21B 1.303(3) . ?
C1B C22B 1.499(3) . ?
C1B H1BA 0.9900 . ?
C1B H1BB 0.9900 . ?
C2B C3B 1.510(3) . ?
C3B C4B 1.531(3) . ?
C3B H3BA 0.9900 . ?
C3B H3BB 0.9900 . ?
C4B C5B 1.509(3) . ?
C4B H4BA 0.9900 . ?
C4B H4BB 0.9900 . ?
C5B C6B 1.399(3) . ?
C5B C10B 1.407(3) . ?
C6B C7B 1.379(3) . ?
C6B H6BA 0.9500 . ?
C7B C8B 1.387(3) . ?
C7B H7BA 0.9500 . ?
C8B C9B 1.380(3) . ?
C8B H8BA 0.9500 . ?
C9B C10B 1.398(3) . ?
C9B H9BA 0.9500 . ?
C11B C12B 1.526(3) . ?
C12B C13B 1.529(3) . ?
C12B H12B 1.0000 . ?
C13B H13D 0.9800 . ?
C13B H13E 0.9800 . ?
C13B H13F 0.9800 . ?
C14B C15B 1.505(2) . ?
C15B C16B 1.395(3) . ?
C15B C20B 1.406(3) . ?
C16B C17B 1.389(3) . ?
C16B H16B 0.9500 . ?
C17B C18B 1.385(3) . ?
C17B H17B 0.9500 . ?
C18B C19B 1.386(3) . ?
C18B H18B 0.9500 . ?
C19B C20B 1.386(3) . ?
C19B H19B 0.9500 . ?
C21B C23B 1.482(3) . ?
C23B H23D 0.9800 . ?
C23B H23E 0.9800 . ?
C23B H23F 0.9800 . ?

loop_
_geom_angle_atom_site_label_1
_geom_angle_atom_site_label_2
_geom_angle_atom_site_label_3
_geom_angle
_geom_angle_site_symmetry_1
_geom_angle_site_symmetry_3
_geom_angle_publ_flag
C2A N1A C1A 118.53(16) . . ?
C2A N1A H1NA 119.7(16) . . ?
C1A N1A H1NA 117.9(16) . . ?
C11A N2A C10A 127.67(16) . . ?
C11A N2A H2NA 117.0(14) . . ?
C10A N2A H2NA 115.3(14) . . ?
C14A N3A C12A 122.86(16) . . ?
C14A N3A H3NA 118.0(15) . . ?
C12A N3A H3NA 119.1(15) . . ?
C22A N4A C21A 104.89(15) . . ?
C22A N4A C20A 126.51(16) . . ?
C21A N4A C20A 128.57(16) . . ?
C22A N5A N6A 107.72(16) . . ?
C21A N6A N5A 107.11(15) . . ?
N1A C1A C22A 113.31(16) . . ?
N1A C1A H1AA 108.9 . . ?
C22A C1A H1AA 108.9 . . ?
N1A C1A H1AB 108.9 . . ?
C22A C1A H1AB 108.9 . . ?
H1AA C1A H1AB 107.7 . . ?
O1A C2A N1A 120.63(18) . . ?
O1A C2A C3A 122.66(17) . . ?
N1A C2A C3A 116.71(16) . . ?
C2A C3A C4A 113.22(16) . . ?
C2A C3A H3AA 108.9 . . ?
C4A C3A H3AA 108.9 . . ?
C2A C3A H3AB 108.9 . . ?
C4A C3A H3AB 108.9 . . ?
H3AA C3A H3AB 107.7 . . ?
C5A C4A C3A 113.35(17) . . ?
C5A C4A H4AA 108.9 . . ?
C3A C4A H4AA 108.9 . . ?
C5A C4A H4AB 108.9 . . ?
C3A C4A H4AB 108.9 . . ?
H4AA C4A H4AB 107.7 . . ?
C6A C5A C10A 118.03(18) . . ?
C6A C5A C4A 117.80(17) . . ?
C10A C5A C4A 124.07(16) . . ?
C7A C6A C5A 121.78(19) . . ?
C7A C6A H6AA 119.1 . . ?
C5A C6A H6AA 119.1 . . ?
C6A C7A C8A 119.22(18) . . ?
C6A C7A H7AA 120.4 . . ?
C8A C7A H7AA 120.4 . . ?
C7A C8A C9A 120.58(19) . . ?
C7A C8A H8AA 119.7 . . ?
C9A C8A H8AA 119.7 . . ?
C8A C9A C10A 120.37(19) . . ?
C8A C9A H9AA 119.8 . . ?
C10A C9A H9AA 119.8 . . ?
C9A C10A C5A 119.96(17) . . ?
C9A C10A N2A 121.57(17) . . ?
C5A C10A N2A 118.40(16) . . ?
O2A C11A N2A 124.66(17) . . ?
O2A C11A C12A 121.48(16) . . ?
N2A C11A C12A 113.57(16) . . ?
N3A C12A C13A 111.80(16) . . ?
N3A C12A C11A 113.37(14) . . ?
C13A C12A C11A 113.59(15) . . ?
N3A C12A H12A 105.8 . . ?
C13A C12A H12A 105.8 . . ?
C11A C12A H12A 105.8 . . ?
C12A C13A H13A 109.5 . . ?
C12A C13A H13B 109.5 . . ?
H13A C13A H13B 109.5 . . ?
C12A C13A H13C 109.5 . . ?
H13A C13A H13C 109.5 . . ?
H13B C13A H13C 109.5 . . ?
O3A C14A N3A 123.68(17) . . ?
O3A C14A C15A 122.76(17) . . ?
N3A C14A C15A 113.54(16) . . ?
C16A C15A C20A 117.40(17) . . ?
C16A C15A C14A 118.60(16) . . ?
C20A C15A C14A 124.01(16) . . ?
C17A C16A C15A 122.01(18) . . ?
C17A C16A H16A 119.0 . . ?
C15A C16A H16A 119.0 . . ?
C16A C17A C18A 119.80(18) . . ?
C16A C17A H17A 120.1 . . ?
C18A C17A H17A 120.1 . . ?
C19A C18A C17A 119.09(18) . . ?
C19A C18A H18A 120.5 . . ?
C17A C18A H18A 120.5 . . ?
C20A C19A C18A 121.29(18) . . ?
C20A C19A H19A 119.4 . . ?
C18A C19A H19A 119.4 . . ?
C19A C20A C15A 120.39(17) . . ?
C19A C20A N4A 117.15(16) . . ?
C15A C20A N4A 122.32(16) . . ?
N6A C21A N4A 110.25(16) . . ?
N6A C21A C23A 125.36(18) . . ?
N4A C21A C23A 124.17(17) . . ?
N5A C22A N4A 109.98(17) . . ?
N5A C22A C1A 125.29(17) . . ?
N4A C22A C1A 124.48(16) . . ?
C21A C23A H23A 109.5 . . ?
C21A C23A H23B 109.5 . . ?
H23A C23A H23B 109.5 . . ?
C21A C23A H23C 109.5 . . ?
H23A C23A H23C 109.5 . . ?
H23B C23A H23C 109.5 . . ?
C2B N1B C1B 119.09(16) . . ?
C2B N1B H1NB 120.8(16) . . ?
C1B N1B H1NB 118.5(16) . . ?
C11B N2B C10B 126.65(16) . . ?
C11B N2B H2NB 116.2(16) . . ?
C10B N2B H2NB 117.1(16) . . ?
C14B N3B C12B 120.02(15) . . ?
C14B N3B H3NB 120.7(14) . . ?
C12B N3B H3NB 118.9(14) . . ?
C22B N4B C21B 104.83(15) . . ?
C22B N4B C20B 125.89(15) . . ?
C21B N4B C20B 129.26(16) . . ?
C22B N5B N6B 107.60(15) . . ?
C21B N6B N5B 107.47(15) . . ?
N1B C1B C22B 113.48(15) . . ?
N1B C1B H1BA 108.9 . . ?
C22B C1B H1BA 108.9 . . ?
N1B C1B H1BB 108.9 . . ?
C22B C1B H1BB 108.9 . . ?
H1BA C1B H1BB 107.7 . . ?
O1B C2B N1B 120.75(18) . . ?
O1B C2B C3B 122.78(17) . . ?
N1B C2B C3B 116.42(16) . . ?
C2B C3B C4B 113.24(15) . . ?
C2B C3B H3BA 108.9 . . ?
C4B C3B H3BA 108.9 . . ?
C2B C3B H3BB 108.9 . . ?
C4B C3B H3BB 108.9 . . ?
H3BA C3B H3BB 107.7 . . ?
C5B C4B C3B 113.14(16) . . ?
C5B C4B H4BA 109.0 . . ?
C3B C4B H4BA 109.0 . . ?
C5B C4B H4BB 109.0 . . ?
C3B C4B H4BB 109.0 . . ?
H4BA C4B H4BB 107.8 . . ?
C6B C5B C10B 118.04(17) . . ?
C6B C5B C4B 117.92(17) . . ?
C10B C5B C4B 124.03(17) . . ?
C7B C6B C5B 122.04(18) . . ?
C7B C6B H6BA 119.0 . . ?
C5B C6B H6BA 119.0 . . ?
C6B C7B C8B 119.09(19) . . ?
C6B C7B H7BA 120.5 . . ?
C8B C7B H7BA 120.5 . . ?
C9B C8B C7B 120.57(19) . . ?
C9B C8B H8BA 119.7 . . ?
C7B C8B H8BA 119.7 . . ?
C8B C9B C10B 120.44(18) . . ?
C8B C9B H9BA 119.8 . . ?
C10B C9B H9BA 119.8 . . ?
C9B C10B C5B 119.80(17) . . ?
C9B C10B N2B 120.64(17) . . ?
C5B C10B N2B 119.55(16) . . ?
O2B C11B N2B 124.31(17) . . ?
O2B C11B C12B 118.09(15) . . ?
N2B C11B C12B 117.60(15) . . ?
N3B C12B C11B 115.45(14) . . ?
N3B C12B C13B 110.35(15) . . ?
C11B C12B C13B 109.83(15) . . ?
N3B C12B H12B 106.9 . . ?
C11B C12B H12B 106.9 . . ?
C13B C12B H12B 106.9 . . ?
C12B C13B H13D 109.5 . . ?
C12B C13B H13E 109.5 . . ?
H13D C13B H13E 109.5 . . ?
C12B C13B H13F 109.5 . . ?
H13D C13B H13F 109.5 . . ?
H13E C13B H13F 109.5 . . ?
O3B C14B N3B 122.15(17) . . ?
O3B C14B C15B 121.92(16) . . ?
N3B C14B C15B 115.81(15) . . ?
C16B C15B C20B 117.59(17) . . ?
C16B C15B C14B 119.60(16) . . ?
C20B C15B C14B 122.75(16) . . ?
C17B C16B C15B 121.83(17) . . ?
C17B C16B H16B 119.1 . . ?
C15B C16B H16B 119.1 . . ?
C18B C17B C16B 119.61(18) . . ?
C18B C17B H17B 120.2 . . ?
C16B C17B H17B 120.2 . . ?
C17B C18B C19B 119.66(18) . . ?
C17B C18B H18B 120.2 . . ?
C19B C18B H18B 120.2 . . ?
C18B C19B C20B 120.73(17) . . ?
C18B C19B H19B 119.6 . . ?
C20B C19B H19B 119.6 . . ?
C19B C20B C15B 120.58(16) . . ?
C19B C20B N4B 117.58(16) . . ?
C15B C20B N4B 121.69(16) . . ?
N6B C21B N4B 109.90(16) . . ?
N6B C21B C23B 125.26(17) . . ?
N4B C21B C23B 124.64(17) . . ?
N5B C22B N4B 110.16(16) . . ?
N5B C22B C1B 125.07(17) . . ?
N4B C22B C1B 124.57(16) . . ?
C21B C23B H23D 109.5 . . ?
C21B C23B H23E 109.5 . . ?
H23D C23B H23E 109.5 . . ?
C21B C23B H23F 109.5 . . ?
H23D C23B H23F 109.5 . . ?
H23E C23B H23F 109.5 . . ?

loop_
_geom_torsion_atom_site_label_1
_geom_torsion_atom_site_label_2
_geom_torsion_atom_site_label_3
_geom_torsion_atom_site_label_4
_geom_torsion
_geom_torsion_site_symmetry_1
_geom_torsion_site_symmetry_2
_geom_torsion_site_symmetry_3
_geom_torsion_site_symmetry_4
_geom_torsion_publ_flag
C22A N5A N6A C21A 0.4(2) . . . . ?
C2A N1A C1A C22A -62.9(2) . . . . ?
C1A N1A C2A O1A 6.9(3) . . . . ?
C1A N1A C2A C3A -172.38(17) . . . . ?
O1A C2A C3A C4A 16.2(3) . . . . ?
N1A C2A C3A C4A -164.63(17) . . . . ?
C2A C3A C4A C5A 73.7(2) . . . . ?
C3A C4A C5A C6A 78.5(2) . . . . ?
C3A C4A C5A C10A -105.3(2) . . . . ?
C10A C5A C6A C7A -2.0(3) . . . . ?
C4A C5A C6A C7A 174.46(18) . . . . ?
C5A C6A C7A C8A 0.3(3) . . . . ?
C6A C7A C8A C9A 1.6(3) . . . . ?
C7A C8A C9A C10A -1.7(3) . . . . ?
C8A C9A C10A C5A 0.0(3) . . . . ?
C8A C9A C10A N2A -176.84(17) . . . . ?
C6A C5A C10A C9A 1.8(3) . . . . ?
C4A C5A C10A C9A -174.37(17) . . . . ?
C6A C5A C10A N2A 178.74(16) . . . . ?
C4A C5A C10A N2A 2.5(3) . . . . ?
C11A N2A C10A C9A 29.0(3) . . . . ?
C11A N2A C10A C5A -147.81(19) . . . . ?
C10A N2A C11A O2A -5.8(3) . . . . ?
C10A N2A C11A C12A 168.09(17) . . . . ?
C14A N3A C12A C13A -67.8(2) . . . . ?
C14A N3A C12A C11A 62.2(2) . . . . ?
O2A C11A C12A N3A -149.64(18) . . . . ?
N2A C11A C12A N3A 36.3(2) . . . . ?
O2A C11A C12A C13A -20.6(3) . . . . ?
N2A C11A C12A C13A 165.33(17) . . . . ?
C12A N3A C14A O3A -9.2(3) . . . . ?
C12A N3A C14A C15A 168.95(16) . . . . ?
O3A C14A C15A C16A 134.2(2) . . . . ?
N3A C14A C15A C16A -43.9(2) . . . . ?
O3A C14A C15A C20A -45.3(3) . . . . ?
N3A C14A C15A C20A 136.62(18) . . . . ?
C20A C15A C16A C17A -1.5(3) . . . . ?
C14A C15A C16A C17A 178.93(18) . . . . ?
C15A C16A C17A C18A 0.3(3) . . . . ?
C16A C17A C18A C19A 0.4(3) . . . . ?
C17A C18A C19A C20A 0.1(3) . . . . ?
C18A C19A C20A C15A -1.4(3) . . . . ?
C18A C19A C20A N4A -177.19(18) . . . . ?
C16A C15A C20A C19A 2.0(3) . . . . ?
C14A C15A C20A C19A -178.46(18) . . . . ?
C16A C15A C20A N4A 177.62(17) . . . . ?
C14A C15A C20A N4A -2.9(3) . . . . ?
C22A N4A C20A C19A 69.5(3) . . . . ?
C21A N4A C20A C19A -108.2(2) . . . . ?
C22A N4A C20A C15A -106.3(2) . . . . ?
C21A N4A C20A C15A 76.1(3) . . . . ?
N5A N6A C21A N4A -1.7(2) . . . . ?
N5A N6A C21A C23A 173.08(18) . . . . ?
C22A N4A C21A N6A 2.2(2) . . . . ?
C20A N4A C21A N6A -179.80(17) . . . . ?
C22A N4A C21A C23A -172.63(18) . . . . ?
C20A N4A C21A C23A 5.4(3) . . . . ?
N6A N5A C22A N4A 0.9(2) . . . . ?
N6A N5A C22A C1A -173.56(17) . . . . ?
C21A N4A C22A N5A -1.9(2) . . . . ?
C20A N4A C22A N5A -179.96(16) . . . . ?
C21A N4A C22A C1A 172.67(17) . . . . ?
C20A N4A C22A C1A -5.4(3) . . . . ?
N1A C1A C22A N5A -62.4(2) . . . . ?
N1A C1A C22A N4A 123.86(19) . . . . ?
C22B N5B N6B C21B -0.5(2) . . . . ?
C2B N1B C1B C22B 64.4(2) . . . . ?
C1B N1B C2B O1B -6.9(3) . . . . ?
C1B N1B C2B C3B 170.56(16) . . . . ?
O1B C2B C3B C4B -13.5(3) . . . . ?
N1B C2B C3B C4B 169.04(17) . . . . ?
C2B C3B C4B C5B -77.5(2) . . . . ?
C3B C4B C5B C6B -76.9(2) . . . . ?
C3B C4B C5B C10B 103.8(2) . . . . ?
C10B C5B C6B C7B 1.2(3) . . . . ?
C4B C5B C6B C7B -178.10(18) . . . . ?
C5B C6B C7B C8B -0.4(3) . . . . ?
C6B C7B C8B C9B -0.9(3) . . . . ?
C7B C8B C9B C10B 1.2(3) . . . . ?
C8B C9B C10B C5B -0.3(3) . . . . ?
C8B C9B C10B N2B 178.79(17) . . . . ?
C6B C5B C10B C9B -0.9(3) . . . . ?
C4B C5B C10B C9B 178.39(17) . . . . ?
C6B C5B C10B N2B -179.98(16) . . . . ?
C4B C5B C10B N2B -0.7(3) . . . . ?
C11B N2B C10B C9B -31.2(3) . . . . ?
C11B N2B C10B C5B 147.85(18) . . . . ?
C10B N2B C11B O2B -1.2(3) . . . . ?
C10B N2B C11B C12B 179.13(16) . . . . ?
C14B N3B C12B C11B -81.6(2) . . . . ?
C14B N3B C12B C13B 153.13(17) . . . . ?
O2B C11B C12B N3B 167.90(16) . . . . ?
N2B C11B C12B N3B -12.4(2) . . . . ?
O2B C11B C12B C13B -66.6(2) . . . . ?
N2B C11B C12B C13B 113.09(18) . . . . ?
C12B N3B C14B O3B 9.3(3) . . . . ?
C12B N3B C14B C15B -166.68(15) . . . . ?
O3B C14B C15B C16B -137.77(19) . . . . ?
N3B C14B C15B C16B 38.2(2) . . . . ?
O3B C14B C15B C20B 39.3(3) . . . . ?
N3B C14B C15B C20B -144.74(17) . . . . ?
C20B C15B C16B C17B 0.9(3) . . . . ?
C14B C15B C16B C17B 178.15(17) . . . . ?
C15B C16B C17B C18B -0.5(3) . . . . ?
C16B C17B C18B C19B -0.1(3) . . . . ?
C17B C18B C19B C20B 0.3(3) . . . . ?
C18B C19B C20B C15B 0.1(3) . . . . ?
C18B C19B C20B N4B 175.65(17) . . . . ?
C16B C15B C20B C19B -0.7(3) . . . . ?
C14B C15B C20B C19B -177.84(16) . . . . ?
C16B C15B C20B N4B -176.08(16) . . . . ?
C14B C15B C20B N4B 6.8(3) . . . . ?
C22B N4B C20B C19B -74.7(2) . . . . ?
C21B N4B C20B C19B 107.1(2) . . . . ?
C22B N4B C20B C15B 100.8(2) . . . . ?
C21B N4B C20B C15B -77.5(2) . . . . ?
N5B N6B C21B N4B 1.6(2) . . . . ?
N5B N6B C21B C23B -173.38(17) . . . . ?
C22B N4B C21B N6B -2.0(2) . . . . ?
C20B N4B C21B N6B 176.48(17) . . . . ?
C22B N4B C21B C23B 173.00(17) . . . . ?
C20B N4B C21B C23B -8.5(3) . . . . ?
N6B N5B C22B N4B -0.8(2) . . . . ?
N6B N5B C22B C1B 174.21(17) . . . . ?
C21B N4B C22B N5B 1.69(19) . . . . ?
C20B N4B C22B N5B -176.89(16) . . . . ?
C21B N4B C22B C1B -173.31(17) . . . . ?
C20B N4B C22B C1B 8.1(3) . . . . ?
N1B C1B C22B N5B 59.0(2) . . . . ?
N1B C1B C22B N4B -126.73(19) . . . . ?

loop_
_geom_hbond_atom_site_label_D
_geom_hbond_atom_site_label_H
_geom_hbond_atom_site_label_A
_geom_hbond_distance_DH
_geom_hbond_distance_HA
_geom_hbond_distance_DA
_geom_hbond_angle_DHA
_geom_hbond_site_symmetry_A
N1B H1NB O2B 0.88(3) 2.06(3) 2.921(2) 166(2) 1_545
N2B H2NB O1B 0.83(2) 2.07(2) 2.833(2) 152(2) .
N2B H2NB N3B 0.83(2) 2.37(2) 2.788(2) 111.9(18) .
N3B H3NB N5A 0.82(2) 2.10(2) 2.892(2) 162(2) 1_564
N1A H1NA O2A 0.84(3) 2.16(3) 2.969(2) 160(2) 1_645
N2A H2NA O1A 0.92(2) 1.98(2) 2.809(2) 148.9(19) .
N3A H3NA N5B 0.90(3) 2.03(3) 2.819(2) 146(2) .

_refine_diff_density_max         0.104
_refine_diff_density_min         -0.169
_refine_diff_density_rms         0.033

_shelx_res_file                  
; 
TITL d18116_a.res in P1 
    d18116_a.res 
    created by SHELXL-2016/6 at 12:09:37 on 27-Jul-2018 
REM Old TITL d18116 in P1 
  
REM SHELXT solution in P1 
REM R1 0.067,  Rweak 0.030,  Alpha 0.000,  Orientation as input 
REM Flack x =  0.111 ( 0.033 ) from Parsons' quotients 
REM Formula found by SHELXT:  C46 N12 O6 
  
CELL  1.54178   9.4853   9.6442  13.9176   74.721   71.339   61.439 
ZERR    2.000   0.0002   0.0002   0.0003    0.001    0.001    0.001 
LATT -1 
SFAC C H N O 
UNIT 46 48 12 6 
TEMP -123.140 
SIZE 0.11 0.17 0.20 
ACTA 
L.S. 5 
BOND $H 
CONF 
HTAB 
HTAB C9A O2A 
HTAB C23A O3A 
HTAB C9B O2B 
EQIV $1 x, y+1, z-1 
HTAB C13B N5A_$1 
HTAB C13B N6A_$1 
EQIV $2 x+1, y-1, z 
HTAB C23B O2B_$2 
HTAB C23B O3B 
EQIV $3 x, y-1, z 
HTAB N1B O2B_$3 
HTAB N2B O1B 
HTAB N2B N3B 
HTAB N3B N5A_$1 
HTAB N1A O2A_$2 
HTAB N2A O1A 
HTAB N3A N5B 
HTAB N3A N6B 
FMAP 2 
PLAN 20 
WGHT    0.030900    0.172400 
FVAR       1.05097 
O1A   4    0.706090    0.141381    0.722668    11.00000    0.01849    0.01937 = 
         0.03153   -0.00340   -0.01127   -0.00428 
O2A   4    0.244522    0.675166    0.778899    11.00000    0.01955    0.02067 = 
         0.02764   -0.00877   -0.00582   -0.00114 
O3A   4    0.258206    0.285490    0.778673    11.00000    0.02492    0.02444 = 
         0.01980   -0.00447    0.00147   -0.00933 
N1A   3    0.899548   -0.080631    0.785590    11.00000    0.01683    0.02160 = 
         0.02638   -0.00334   -0.00766   -0.00227 
N2A   3    0.495341    0.457932    0.758272    11.00000    0.01775    0.01691 = 
         0.02270   -0.00595   -0.00649   -0.00427 
N3A   3    0.402418    0.360092    0.627389    11.00000    0.01673    0.01605 = 
         0.01764   -0.00372   -0.00186   -0.00520 
N4A   3    0.500593   -0.063152    0.822887    11.00000    0.02030    0.01890 = 
         0.01481   -0.00129   -0.00403   -0.00684 
N5A   3    0.604247   -0.106384    0.953576    11.00000    0.02027    0.02085 = 
         0.02029   -0.00285   -0.00547   -0.00517 
N6A   3    0.434633   -0.058417    0.988819    11.00000    0.02425    0.02204 = 
         0.01812   -0.00249   -0.00495   -0.00764 
C1A   1    0.811144   -0.170266    0.789149    11.00000    0.02086    0.01869 = 
         0.02369   -0.00411   -0.00471   -0.00404 
AFIX  23 
H1AA  2    0.874021   -0.283101    0.815050    11.00000   -1.20000 
H1AB  2    0.804623   -0.166205    0.718804    11.00000   -1.20000 
AFIX   0 
C2A   1    0.840567    0.073692    0.746195    11.00000    0.01668    0.02262 = 
         0.02063   -0.00742   -0.00480   -0.00381 
C3A   1    0.947415    0.156852    0.731479    11.00000    0.01866    0.02614 = 
         0.03938   -0.01173   -0.00971   -0.00567 
AFIX  23 
H3AA  2    1.041126    0.121030    0.672048    11.00000   -1.20000 
H3AB  2    0.993129    0.125290    0.792697    11.00000   -1.20000 
AFIX   0 
C4A   1    0.854534    0.338979    0.713914    11.00000    0.01927    0.02650 = 
         0.02533   -0.00411   -0.00589   -0.01136 
AFIX  23 
H4AA  2    0.935701    0.384665    0.686711    11.00000   -1.20000 
H4AB  2    0.790902    0.369465    0.661578    11.00000   -1.20000 
AFIX   0 
C5A   1    0.737776    0.410263    0.809997    11.00000    0.02359    0.01525 = 
         0.02379   -0.00014   -0.00886   -0.00904 
C6A   1    0.805508    0.425668    0.880374    11.00000    0.02834    0.02107 = 
         0.02815   -0.00045   -0.01226   -0.01208 
AFIX  43 
H6AA  2    0.921966    0.382893    0.869101    11.00000   -1.20000 
AFIX   0 
C7A   1    0.707533    0.501339    0.965647    11.00000    0.03733    0.02617 = 
         0.02595    0.00080   -0.01575   -0.01760 
AFIX  43 
H7AA  2    0.756032    0.510880    1.012200    11.00000   -1.20000 
AFIX   0 
C8A   1    0.537948    0.563083    0.982490    11.00000    0.03428    0.02442 = 
         0.02035   -0.00353   -0.00505   -0.01389 
AFIX  43 
H8AA  2    0.469663    0.617668    1.040045    11.00000   -1.20000 
AFIX   0 
C9A   1    0.466869    0.546042    0.916229    11.00000    0.02472    0.02084 = 
         0.02178   -0.00162   -0.00474   -0.01089 
AFIX  43 
H9AA  2    0.350369    0.586404    0.929620    11.00000   -1.20000 
AFIX   0 
C10A  1    0.565095    0.470119    0.830104    11.00000    0.02443    0.01539 = 
         0.02052    0.00241   -0.00937   -0.01032 
C11A  1    0.347951    0.559721    0.734643    11.00000    0.01718    0.01604 = 
         0.01977   -0.00083   -0.00396   -0.00655 
C12A  1    0.326882    0.529007    0.638482    11.00000    0.01917    0.01575 = 
         0.01946   -0.00165   -0.00545   -0.00516 
AFIX  13 
H12A  2    0.389234    0.577688    0.579202    11.00000   -1.20000 
AFIX   0 
C13A  1    0.150334    0.612366    0.626827    11.00000    0.02401    0.02523 = 
         0.03239   -0.00792   -0.01307   -0.00222 
AFIX 137 
H13A  2    0.107230    0.726766    0.628364    11.00000   -1.50000 
H13B  2    0.082848    0.569024    0.683103    11.00000   -1.50000 
H13C  2    0.146711    0.595236    0.561474    11.00000   -1.50000 
AFIX   0 
C14A  1    0.354604    0.254964    0.695407    11.00000    0.01645    0.01786 = 
         0.01707   -0.00166   -0.00662   -0.00467 
C15A  1    0.426283    0.095181    0.658787    11.00000    0.01565    0.02073 = 
         0.01829   -0.00322   -0.00287   -0.00884 
C16A  1    0.428275    0.091983    0.558365    11.00000    0.02386    0.02307 = 
         0.01900   -0.00039   -0.00730   -0.01003 
AFIX  43 
H16A  2    0.382994    0.189866    0.516135    11.00000   -1.20000 
AFIX   0 
C17A  1    0.494140   -0.049300    0.518771    11.00000    0.02821    0.03233 = 
         0.02092   -0.00706   -0.00666   -0.01520 
AFIX  43 
H17A  2    0.494284   -0.047692    0.450196    11.00000   -1.20000 
AFIX   0 
C18A  1    0.559965   -0.193306    0.579451    11.00000    0.02948    0.02244 = 
         0.02613   -0.00895   -0.00407   -0.01276 
AFIX  43 
H18A  2    0.606124   -0.291020    0.552847    11.00000   -1.20000 
AFIX   0 
C19A  1    0.557505   -0.192756    0.679478    11.00000    0.02734    0.01955 = 
         0.02418   -0.00088   -0.00582   -0.01073 
AFIX  43 
H19A  2    0.602693   -0.291171    0.721272    11.00000   -1.20000 
AFIX   0 
C20A  1    0.490487   -0.051596    0.719653    11.00000    0.02044    0.01968 = 
         0.01552   -0.00121   -0.00360   -0.00971 
C21A  1    0.376315   -0.036007    0.910103    11.00000    0.02157    0.01782 = 
         0.01812   -0.00084   -0.00338   -0.00756 
C22A  1    0.640747   -0.109758    0.855306    11.00000    0.02145    0.01461 = 
         0.01925   -0.00063   -0.00595   -0.00507 
C23A  1    0.204921   -0.001113    0.914338    11.00000    0.02328    0.03127 = 
         0.02326    0.00070   -0.00537   -0.01156 
AFIX 137 
H23A  2    0.205868   -0.072450    0.875109    11.00000   -1.50000 
H23B  2    0.147665    0.109688    0.885022    11.00000   -1.50000 
H23C  2    0.147618   -0.017448    0.985689    11.00000   -1.50000 
AFIX   0 
O1B   4    0.492540    0.651966    0.218714    11.00000    0.02231    0.01937 = 
         0.02866   -0.00456   -0.00323   -0.01326 
O2B   4    0.336004    1.194471    0.294264    11.00000    0.02497    0.01825 = 
         0.03023   -0.00963    0.00025   -0.01145 
O3B   4    0.744913    0.770646    0.295910    11.00000    0.03263    0.02226 = 
         0.01923   -0.00520   -0.00772   -0.01059 
N1B   3    0.468070    0.422680    0.271803    11.00000    0.02667    0.02025 = 
         0.02735   -0.00363   -0.00548   -0.01581 
N2B   3    0.345267    0.967230    0.265785    11.00000    0.01722    0.01543 = 
         0.02071   -0.00517   -0.00072   -0.00831 
N3B   3    0.665856    0.882167    0.146710    11.00000    0.01868    0.01665 = 
         0.01529   -0.00311   -0.00410   -0.00800 
N4B   3    0.816847    0.431680    0.316599    11.00000    0.02060    0.01594 = 
         0.01377   -0.00137   -0.00219   -0.00904 
N5B   3    0.630226    0.382321    0.442169    11.00000    0.02542    0.02196 = 
         0.01925   -0.00409   -0.00169   -0.01315 
N6B   3    0.719005    0.424124    0.482880    11.00000    0.02445    0.02227 = 
         0.01731   -0.00385   -0.00199   -0.01245 
C1B   1    0.641614    0.335389    0.271922    11.00000    0.02640    0.01925 = 
         0.02319   -0.00633   -0.00462   -0.01140 
AFIX  23 
H1BA  2    0.706887    0.349772    0.201752    11.00000   -1.20000 
H1BB  2    0.668841    0.220509    0.291100    11.00000   -1.20000 
AFIX   0 
C2B   1    0.406870    0.579617    0.239115    11.00000    0.02240    0.02296 = 
         0.01953   -0.00792   -0.00021   -0.01402 
C3B   1    0.232470    0.658569    0.224893    11.00000    0.02122    0.02552 = 
         0.03461   -0.01052   -0.00163   -0.01446 
AFIX  23 
H3BA  2    0.161706    0.625021    0.286277    11.00000   -1.20000 
H3BB  2    0.230835    0.621386    0.165568    11.00000   -1.20000 
AFIX   0 
C4B   1    0.160186    0.840636    0.207507    11.00000    0.01993    0.02541 = 
         0.02405   -0.00325   -0.00511   -0.01238 
AFIX  23 
H4BA  2    0.244242    0.873478    0.158575    11.00000   -1.20000 
H4BB  2    0.064745    0.883341    0.176215    11.00000   -1.20000 
AFIX   0 
C5B   1    0.105161    0.912482    0.304620    11.00000    0.01648    0.01469 = 
         0.02390    0.00015   -0.00575   -0.00611 
C6B   1   -0.043849    0.920532    0.371263    11.00000    0.01796    0.02034 = 
         0.03076    0.00095   -0.00604   -0.00944 
AFIX  43 
H6BA  2   -0.103775    0.877972    0.354632    11.00000   -1.20000 
AFIX   0 
C7B   1   -0.106428    0.988351    0.460360    11.00000    0.01873    0.02489 = 
         0.03058   -0.00137    0.00168   -0.00998 
AFIX  43 
H7BA  2   -0.208205    0.992921    0.504172    11.00000   -1.20000 
AFIX   0 
C8B   1   -0.018736    1.049761    0.485093    11.00000    0.02680    0.02405 = 
         0.02278   -0.00527    0.00097   -0.00921 
AFIX  43 
H8BA  2   -0.061564    1.098033    0.545803    11.00000   -1.20000 
AFIX   0 
C9B   1    0.130228    1.041356    0.422269    11.00000    0.02324    0.02171 = 
         0.02229   -0.00302   -0.00437   -0.01057 
AFIX  43 
H9BA  2    0.190169    1.082024    0.440703    11.00000   -1.20000 
AFIX   0 
C10B  1    0.193485    0.973402    0.331700    11.00000    0.01543    0.01356 = 
         0.02091    0.00088   -0.00424   -0.00574 
C11B  1    0.406733    1.072644    0.251657    11.00000    0.01966    0.01350 = 
         0.01834    0.00010   -0.00652   -0.00755 
C12B  1    0.574171    1.040555    0.177830    11.00000    0.02010    0.01600 = 
         0.02114   -0.00328   -0.00308   -0.01042 
AFIX  13 
H12B  2    0.642760    1.052848    0.213732    11.00000   -1.20000 
AFIX   0 
C13B  1    0.553916    1.167538    0.083944    11.00000    0.03581    0.01627 = 
         0.02819   -0.00145    0.00029   -0.01251 
AFIX 137 
H13D  2    0.488112    1.273441    0.106035    11.00000   -1.50000 
H13E  2    0.497933    1.151839    0.042323    11.00000   -1.50000 
H13F  2    0.662717    1.158750    0.043280    11.00000   -1.50000 
AFIX   0 
C14B  1    0.754252    0.759228    0.207980    11.00000    0.01767    0.01755 = 
         0.01717   -0.00141   -0.00279   -0.01140 
C15B  1    0.873985    0.610108    0.159820    11.00000    0.01550    0.02050 = 
         0.01479   -0.00203   -0.00368   -0.00973 
C16B  1    0.961664    0.622040    0.058581    11.00000    0.01864    0.02299 = 
         0.01650    0.00012   -0.00376   -0.01098 
AFIX  43 
H16B  2    0.942001    0.724615    0.020754    11.00000   -1.20000 
AFIX   0 
C17B  1    1.076946    0.488062    0.011545    11.00000    0.01805    0.03217 = 
         0.01686   -0.00460   -0.00068   -0.01125 
AFIX  43 
H17B  2    1.134371    0.499391   -0.057683    11.00000   -1.20000 
AFIX   0 
C18B  1    1.107653    0.337907    0.066169    11.00000    0.01725    0.02631 = 
         0.02223   -0.01006   -0.00103   -0.00496 
AFIX  43 
H18B  2    1.186105    0.245656    0.034564    11.00000   -1.20000 
AFIX   0 
C19B  1    1.023341    0.322926    0.167174    11.00000    0.02273    0.01733 = 
         0.02214   -0.00268   -0.00590   -0.00534 
AFIX  43 
H19B  2    1.044866    0.219918    0.204733    11.00000   -1.20000 
AFIX   0 
C20B  1    0.907944    0.456584    0.214013    11.00000    0.01860    0.02036 = 
         0.01334   -0.00125   -0.00298   -0.00984 
C21B  1    0.830924    0.450482    0.407497    11.00000    0.02282    0.01653 = 
         0.01521   -0.00191   -0.00354   -0.00843 
C22B  1    0.691137    0.386461    0.343832    11.00000    0.02159    0.01502 = 
         0.01915   -0.00236   -0.00371   -0.00893 
C23B  1    0.963188    0.481925    0.418225    11.00000    0.02559    0.02640 = 
         0.02007   -0.00136   -0.00568   -0.01374 
AFIX 137 
H23D  2    1.068855    0.415991    0.376372    11.00000   -1.50000 
H23E  2    0.969706    0.455910    0.490119    11.00000   -1.50000 
H23F  2    0.938478    0.594668    0.395278    11.00000   -1.50000 
AFIX   0 
H1NA  2    1.000150   -0.131746    0.787136    11.00000    0.02418 
H2NA  2    0.559996    0.372656    0.722527    11.00000    0.01949 
H3NA  2    0.480058    0.325681    0.570843    11.00000    0.02495 
H1NB  2    0.411832    0.368706    0.278884    11.00000    0.02786 
H2NB  2    0.403905    0.888930    0.233826    11.00000    0.01890 
H3NB  2    0.671256    0.871328    0.088810    11.00000    0.01309 
  
HKLF 4 
  
  
  
  
REM  d18116_a.res in P1 
REM R1 =  0.0227 for    7090 Fo > 4sig(Fo)  and  0.0231 for all    7168 data 
REM    605 parameters refined using      3 restraints 
  
END 
  
WGHT      0.0306      0.1735 
  
REM Instructions for potential hydrogen bonds 
HTAB C9A O2A 
HTAB C23A O3A 
HTAB C9B O2B 
HTAB C13B N5A_$1 
HTAB C13B N6A_$1 
HTAB C23B O2B_$2 
HTAB C23B O3B 
HTAB N1A O2A_$2 
HTAB N2A O1A 
HTAB N3A N5B 
HTAB N3A N6B 
HTAB N1B O2B_$3 
HTAB N2B O1B 
HTAB N2B N3B 
HTAB N3B N5A_$1 
  
REM Highest difference peak  0.104,  deepest hole -0.169,  1-sigma level  0.033 
Q1    1   1.0277  0.5271  0.3544  11.00000  0.05    0.10 
Q2    1   0.6816  0.1839  0.3784  11.00000  0.05    0.10 
Q3    1   1.3455  0.2866 -0.0683  11.00000  0.05    0.10 
Q4    1   0.7965  0.9806 -0.0571  11.00000  0.05    0.10 
Q5    1   0.4664 -0.2402  0.4549  11.00000  0.05    0.10 
Q6    1   0.7037 -0.1434  0.9694  11.00000  0.05    0.10 
Q7    1   0.2946  0.9556  0.4965  11.00000  0.05    0.10 
Q8    1   0.7121  0.4952  1.0628  11.00000  0.05    0.09 
Q9    1   0.3747  0.3907  0.9273  11.00000  0.05    0.09 
Q10   1   1.0821  0.2390  0.5874  11.00000  0.05    0.09 
Q11   1  -0.1007  0.8004  0.5062  11.00000  0.05    0.09 
Q12   1   0.2229  0.7201  0.8385  11.00000  0.05    0.09 
Q13   1  -0.0066  0.7019  0.5240  11.00000  0.05    0.09 
Q14   1   1.1404  0.1629  0.5505  11.00000  0.05    0.09 
Q15   1   0.4517  0.1701  0.3987  11.00000  0.05    0.09 
Q16   1   0.7014  1.2171  0.0324  11.00000  0.05    0.09 
Q17   1   0.5806  0.3265  0.4664  11.00000  0.05    0.09 
Q18   1   0.2381  0.5768  0.6346  11.00000  0.05    0.09 
Q19   1   0.3177 -0.1854  0.6127  11.00000  0.05    0.09 
Q20   1   1.2617 -0.0547  0.6576  11.00000  0.05    0.09 
;
_shelx_res_checksum              30422

_shelx_hkl_file                  
; 
  -1   0   0 3438.46  120.19 
  -1   0   0 3372.86  119.79 
  -1   0   0 3436.76  120.69 
   1   0   0 3518.65  120.59 
   1   0   0 3247.07  120.59 
   1   0   0 3569.54  119.79 
  -2   0   0  670.03   22.50 
  -2   0   0  608.64   22.40 
  -2   0   0  615.84   22.40 
  -2   0   0  641.84   22.20 
  -2   0   0  645.84   22.30 
  -2   0   0  602.64   22.20 
   2   0   0  624.24   22.40 
   2   0   0  645.24   22.20 
  -3   0   0  332.47   12.60 
  -3   0   0  362.16   13.30 
  -3   0   0  350.66   12.50 
  -3   0   0  369.66   12.90 
  -3   0   0  331.77   12.70 
   3   0   0  324.17   12.50 
   3   0   0  333.17   12.40 
   3   0   0  344.67   12.30 
   3   0   0  351.16   12.40 
  -4   0   0  467.75   17.70 
  -4   0   0  475.35   17.10 
  -4   0   0  454.05   16.60 
  -4   0   0  458.65   16.90 
  -4   0   0  430.66   16.40 
   4   0   0  461.45   16.50 
   4   0   0  450.85   16.60 
  -5   0   0   84.19    4.00 
  -5   0   0   81.19    4.10 
  -5   0   0   79.79    3.60 
  -5   0   0   83.79    5.00 
  -5   0   0   80.79    3.80 
   5   0   0   83.69    3.70 
  -6   0   0   21.00    2.00 
  -6   0   0   19.50    1.90 
   6   0   0   18.30    1.80 
   6   0   0   18.60    1.70 
   6   0   0   19.50    1.80 
   6   0   0   19.80    2.00 
   6   0   0   18.10    2.10 
   6   0   0   17.80    2.00 
   6   0   0   16.80    2.20 
   6   0   0   20.10    2.40 
   6   0   0   18.30    2.20 
  -7   0   0   59.19    2.70 
  -7   0   0   54.79    3.60 
  -7   0   0   57.19    3.80 
   7   0   0   55.39    3.30 
   7   0   0   55.89    3.80 
   7   0   0   57.89    3.90 
   7   0   0   64.69    4.10 
   7   0   0   56.09    3.70 
   7   0   0   59.79    4.00 
   7   0   0   54.49    3.40 
   7   0   0   54.99    3.20 
  -8   0   0  133.59    6.60 
  -8   0   0  147.39    5.80 
   8   0   0  152.68    6.90 
   8   0   0  143.49    7.00 
   8   0   0  147.09    6.80 
   8   0   0  130.99    6.20 
   8   0   0  140.69    6.80 
   8   0   0  149.69    7.10 
   8   0   0  152.48    6.50 
  -9   0   0    5.90    0.80 
  -9   0   0    5.20    0.90 
   9   0   0    8.50    1.80 
   9   0   0    5.80    1.60 
   9   0   0    5.20    1.90 
   9   0   0    5.30    1.20 
   9   0   0    7.00    1.50 
   9  -1   0   18.80    1.70 
   9  -1   0   17.80    2.00 
   9  -1   0   14.50    1.60 
  -9   1   0   18.60    1.20 
   8  -1   0   97.09    5.00 
   8  -1   0   89.49    4.80 
   8  -1   0  101.79    5.10 
   8  -1   0   88.89    5.10 
   8  -1   0   89.39    4.50 
  -8   1   0   91.99    3.90 
  -8   1   0   91.39    4.00 
   7  -1   0   27.30    2.30 
   7  -1   0   30.30    2.50 
   7  -1   0   34.30    3.20 
   7  -1   0   30.60    3.10 
   7  -1   0   33.10    3.00 
   7  -1   0   31.30    2.60 
   7  -1   0   31.70    2.90 
   7  -1   0   29.90    3.20 
  -7   1   0   30.90    2.00 
  -7   1   0   30.20    2.70 
  -7   1   0   30.50    2.80 
   6  -1   0    8.30    1.90 
   6  -1   0    7.10    1.60 
   6  -1   0    9.40    1.90 
   6  -1   0    6.70    1.50 
   6  -1   0    8.10    1.40 
   6  -1   0    9.10    1.50 
   6  -1   0    8.40    1.50 
   6  -1   0    5.80    1.50 
   6  -1   0    9.20    1.90 
   6  -1   0    7.60    1.20 
  -6   1   0    6.70    1.50 
  -6   1   0   10.50    1.80 
  -6   1   0    6.20    1.40 
  -6   1   0    8.20    1.00 
   5  -1   0  275.17   10.80 
   5  -1   0  278.37   11.20 
   5  -1   0  276.77   11.20 
   5  -1   0  287.27   10.90 
   5  -1   0  295.17   10.80 
   5  -1   0  278.67   11.20 
   5  -1   0  270.57   10.70 
   5  -1   0  287.27   11.40 
   5  -1   0  266.47   10.90 
   5  -1   0  286.37   11.40 
  -5   1   0  294.97   11.10 
  -5   1   0  285.97   11.10 
  -5   1   0  292.07   11.10 
  -5   1   0  283.67   10.30 
   4  -1   0  172.88    6.80 
   4  -1   0  181.88    6.70 
   4  -1   0  164.08    6.40 
  -4   1   0  168.68    7.40 
  -4   1   0  169.38    7.80 
  -4   1   0  166.28    6.50 
  -4   1   0  174.38    6.90 
  -4   1   0  179.08    6.90 
  -4   1   0  174.48    6.60 
  -4   1   0  140.09    7.20 
   3  -1   0 1395.86   47.30 
   3  -1   0 1356.76   47.40 
   3  -1   0 1320.37   47.10 
   3  -1   0 1271.07   47.20 
   3  -1   0 1304.67   47.20 
  -3   1   0 1402.66   48.30 
  -3   1   0 1358.86   47.50 
  -3   1   0 1396.76   47.50 
  -3   1   0 1325.27   47.30 
  -3   1   0 1226.18   47.40 
  -3   1   0 1462.15   48.20 
   2  -1   0   54.49    2.20 
   2  -1   0   53.49    2.60 
  -2   1   0   56.29    2.50 
  -2   1   0   57.09    2.90 
  -2   1   0   51.09    2.00 
  -2   1   0   56.59    2.30 
  -2   1   0   55.89    3.00 
  -2   1   0   51.49    2.40 
  -2   1   0   49.70    2.70 
   1  -1   0  532.15   19.00 
   1  -1   0  518.95   18.70 
   1  -1   0  570.44   19.20 
  -1   1   0  508.95   18.80 
  -1   1   0  542.45   18.70 
  -1   1   0  508.85   19.20 
  -1   1   0  556.74   19.30 
  -1   1   0  542.35   18.90 
  -1   1   0  537.95   19.30 
   0  -1   0   -0.90    0.40 
   0  -1   0   -0.70    0.80 
   0  -1   0   -2.00    0.70 
   0  -1   0   -1.90    0.70 
   0  -1   0   -1.50    0.60 
   0   1   0   -0.20    0.60 
   0   1   0    0.90    0.80 
   0   1   0   -1.00    0.90 
   0   1   0   -2.30    0.60 
   0   1   0   -2.40    0.70 
  -1  -1   0  749.62   26.10 
  -1  -1   0  711.33   26.10 
  -1  -1   0  760.32   26.40 
  -1  -1   0  770.92   26.40 
  -1  -1   0  766.32   26.30 
  -1  -1   0  752.62   26.30 
   1   1   0  762.42   26.70 
   1   1   0  751.42   26.20 
   1   1   0  701.03   26.30 
   1   1   0  697.53   26.30 
  -2  -1   0 1327.57   47.00 
  -2  -1   0 1372.06   47.20 
  -2  -1   0 1380.86   48.40 
  -2  -1   0 1307.47   47.00 
   2   1   0 1344.97   47.90 
  -3  -1   0  683.73   25.00 
  -3  -1   0  729.73   25.00 
  -3  -1   0  675.23   24.50 
  -3  -1   0  742.23   25.10 
   3   1   0  677.63   24.80 
   3   1   0  714.13   24.90 
  -4  -1   0 1163.28   41.70 
  -4  -1   0 1205.48   41.90 
  -4  -1   0 1209.68   41.60 
   4   1   0 1181.38   41.40 
   4   1   0 1120.49   41.30 
  -5  -1   0   51.69    3.10 
  -5  -1   0   50.99    2.80 
  -5  -1   0   53.19    3.70 
   5   1   0   52.29    2.60 
  -6  -1   0   45.40    3.00 
  -6  -1   0   44.30    2.50 
  -6  -1   0   38.70    2.60 
   6   1   0   43.70    2.50 
   6   1   0   39.90    2.60 
   6   1   0   41.40    2.80 
   6   1   0   40.70    2.90 
   6   1   0   42.80    2.50 
   6   1   0   44.80    3.10 
   6   1   0   39.00    2.40 
   6   1   0   36.40    2.80 
   6   1   0   45.80    3.00 
   6   1   0   42.30    2.50 
  -7  -1   0  145.69    5.60 
   7   1   0  148.39    7.00 
   7   1   0  140.99    6.30 
   7   1   0  140.59    6.70 
   7   1   0  152.28    7.10 
   7   1   0  141.79    6.40 
   7   1   0  148.69    6.40 
   7   1   0  152.28    6.90 
   7   1   0  151.28    7.20 
  -8  -1   0    1.70    0.70 
  -8  -1   0    1.70    1.30 
   8   1   0    2.30    1.40 
   8   1   0   -0.20    1.50 
   8   1   0    3.10    1.70 
   8   1   0    5.00    1.70 
   8   1   0    1.60    1.10 
   8   1   0    3.20    1.30 
   8   1   0    2.80    1.60 
  -9  -1   0   38.90    2.10 
   9   1   0   39.90    3.00 
   9   1   0   38.00    3.00 
   9   1   0   39.90    2.90 
   9   1   0   41.40    3.40 
   9   1   0   46.00    3.40 
  10   1   0    0.50    1.10 
  10   1   0    2.20    1.30 
  10   1   0    0.40    1.10 
   8  -2   0   73.19    3.50 
   8  -2   0   66.99    4.00 
   8  -2   0   75.89    4.00 
   8  -2   0   74.39    4.10 
  -8   2   0   68.69    3.30 
  -8   2   0   76.09    3.20 
   7  -2   0   68.29    4.30 
   7  -2   0   63.09    3.70 
   7  -2   0   66.09    4.10 
   7  -2   0   58.19    3.40 
   7  -2   0   64.09    4.30 
   7  -2   0   62.79    3.60 
   7  -2   0   70.19    4.30 
  -7   2   0   63.69    3.90 
  -7   2   0   60.39    3.00 
  -7   2   0   61.29    3.10 
   6  -2   0  172.68    7.30 
   6  -2   0  153.98    7.20 
   6  -2   0  167.68    7.20 
   6  -2   0  170.38    7.70 
   6  -2   0  166.88    7.10 
   6  -2   0  178.28    7.90 
   6  -2   0  174.38    7.30 
   6  -2   0  169.58    7.90 
   6  -2   0  165.88    7.90 
  -6   2   0  176.88    6.70 
  -6   2   0  163.68    6.50 
  -6   2   0  164.48    7.40 
  -6   2   0  169.38    7.60 
  -6   2   0  170.18    7.50 
   5  -2   0  163.58    7.30 
   5  -2   0  159.28    7.00 
   5  -2   0  169.38    7.20 
   5  -2   0  163.08    7.40 
   5  -2   0  163.68    7.50 
   5  -2   0  164.88    6.90 
   5  -2   0  165.88    6.90 
   5  -2   0  165.58    7.30 
   5  -2   0  162.48    6.90 
   5  -2   0  163.48    6.80 
  -5   2   0  157.78    7.10 
  -5   2   0  167.68    7.10 
  -5   2   0  167.48    6.40 
  -5   2   0  161.48    7.10 
  -5   2   0  170.78    7.30 
   4  -2   0  582.54   23.30 
   4  -2   0  634.54   22.90 
   4  -2   0  630.54   22.80 
   4  -2   0  664.63   23.00 
   4  -2   0  581.14   23.10 
   4  -2   0  631.24   23.40 
  -4   2   0  659.13   23.20 
  -4   2   0  625.74   24.20 
  -4   2   0  648.04   23.20 
  -4   2   0  652.33   23.20 
  -4   2   0  651.93   22.50 
  -4   2   0  663.93   23.30 
   3  -2   0  498.15   18.60 
   3  -2   0  505.75   18.50 
   3  -2   0  512.35   18.60 
   3  -2   0  508.55   18.70 
  -3   2   0  538.25   19.80 
  -3   2   0  522.85   18.80 
  -3   2   0  517.35   18.80 
  -3   2   0  520.35   18.80 
  -3   2   0  537.75   18.80 
  -3   2   0  500.95   18.30 
  -3   2   0  517.85   19.80 
   2  -2   0  674.93   23.50 
   2  -2   0  693.43   23.80 
   2  -2   0  663.63   23.70 
   2  -2   0  641.24   23.70 
   2  -2   0  696.53   23.80 
   2  -2   0  654.33   24.50 
   2  -2   0  668.53   23.90 
   2  -2   0  662.23   23.80 
  -2   2   0  681.23   24.80 
  -2   2   0  669.13   23.90 
  -2   2   0  673.13   23.90 
  -2   2   0  706.13   24.70 
  -2   2   0  650.03   23.70 
  -2   2   0  675.93   23.90 
  -2   2   0  637.74   23.80 
  -2   2   0  672.43   23.90 
   1  -2   0 1707.43   59.09 
   1  -2   0 1752.92   59.79 
   1  -2   0 1772.22   58.89 
  -1   2   0 1737.33   59.79 
  -1   2   0 1745.23   59.99 
  -1   2   0 1694.43   59.19 
  -1   2   0 1550.24   59.29 
  -1   2   0 1544.75   59.09 
  -1   2   0 1745.03   59.19 
  -1   2   0 1684.03   59.19 
   0  -2   0 7542.75  276.37 
   0  -2   0 7337.37  270.17 
   0  -2   0 7734.83  273.27 
   0  -2   0 7750.12  269.17 
   0   2   0 7672.33  269.87 
   0   2   0 7930.91  271.87 
   0   2   0 8110.29  270.37 
   0   2   0 7717.63  273.77 
  -1  -2   0 4552.04  153.98 
  -1  -2   0 4308.97  153.48 
  -1  -2   0 4621.34  156.28 
  -1  -2   0 4210.78  154.28 
   1   2   0 4561.34  155.98 
   1   2   0 4100.59  154.08 
   1   2   0 4436.96  153.98 
   1   2   0 4292.17  153.88 
   1   2   0 4491.15  155.88 
  -2  -2   0 4761.62  160.78 
  -2  -2   0 4223.48  162.58 
  -2  -2   0 4590.64  160.58 
  -2  -2   0 4628.34  161.68 
  -2  -2   0 4782.42  163.58 
   2   2   0 4549.44  161.08 
   2   2   0 4689.33  163.58 
  -3  -2   0  427.36   15.50 
  -3  -2   0  471.55   15.90 
  -3  -2   0  426.66   15.30 
  -3  -2   0  450.75   15.30 
  -3  -2   0  441.76   16.00 
   3   2   0  431.06   15.50 
   3   2   0  409.86   15.70 
   3   2   0  433.26   15.60 
  -4  -2   0   92.99    4.00 
  -4  -2   0   86.49    3.30 
  -4  -2   0   83.19    3.50 
  -4  -2   0   94.59    4.00 
   4   2   0   93.99    3.70 
   4   2   0   88.19    3.90 
   4   2   0   83.49    3.60 
  -5  -2   0   41.00    2.70 
  -5  -2   0   38.20    2.40 
   5   2   0   41.70    2.20 
  -6  -2   0   44.40    3.10 
  -6  -2   0   42.80    2.80 
   6   2   0   43.80    3.00 
   6   2   0   42.70    3.00 
   6   2   0   43.20    2.80 
   6   2   0   44.80    2.50 
   6   2   0   41.80    2.50 
   6   2   0   42.00    2.50 
   6   2   0   44.40    2.70 
   6   2   0   42.20    2.90 
   6   2   0   41.50    2.50 
  -7  -2   0  135.39    6.70 
  -7  -2   0  125.19    6.20 
  -7  -2   0  134.49    5.80 
   7   2   0  126.39    5.80 
   7   2   0  128.89    5.80 
   7   2   0  132.79    6.40 
   7   2   0  138.39    6.60 
   7   2   0  127.59    6.30 
   7   2   0  137.29    5.90 
   7   2   0  138.69    6.40 
   7   2   0  133.59    5.80 
  -8  -2   0  119.69    4.90 
   8   2   0  120.09    5.50 
   8   2   0  121.49    6.30 
   8   2   0  120.49    6.10 
   8   2   0  126.69    6.20 
   8   2   0  117.49    5.50 
   8   2   0  124.39    6.40 
   8   2   0  124.19    5.70 
  -9  -2   0    6.50    0.90 
   9   2   0    8.30    1.80 
   9   2   0    9.30    1.60 
   9   2   0    5.10    1.70 
   9   2   0    7.60    2.00 
   9   2   0    3.60    1.50 
 -10  -2   0  121.79    4.90 
  10   2   0  127.29    5.60 
  10   2   0  136.89    5.40 
  10   2   0  129.79    5.70 
  10   2   0  125.49    5.50 
  10   2   0  126.59    5.70 
  -8   3   0  258.17    9.40 
   7  -3   0  213.38    9.00 
   7  -3   0  247.78    9.70 
   7  -3   0  237.88    9.90 
   7  -3   0  218.28    9.50 
   7  -3   0  245.88    9.70 
  -7   3   0  231.58    9.30 
  -7   3   0  239.18    8.70 
  -7   3   0  226.38    8.90 
   6  -3   0  142.39    6.30 
   6  -3   0  144.59    6.90 
   6  -3   0  142.19    6.10 
   6  -3   0  133.39    6.10 
   6  -3   0  132.69    6.70 
   6  -3   0  141.79    7.00 
   6  -3   0  141.09    6.70 
  -6   3   0  137.49    6.70 
  -6   3   0  143.19    5.80 
  -6   3   0  142.39    5.60 
  -6   3   0  131.39    6.40 
   5  -3   0   66.09    4.00 
   5  -3   0   62.49    4.10 
   5  -3   0   59.69    3.90 
   5  -3   0   66.19    4.20 
   5  -3   0   59.19    3.40 
   5  -3   0   68.79    3.80 
   5  -3   0   58.09    3.30 
   5  -3   0   63.49    3.80 
   5  -3   0   55.99    3.10 
   5  -3   0   64.79    3.60 
  -5   3   0   60.99    3.70 
  -5   3   0   67.09    3.90 
  -5   3   0   63.39    3.70 
  -5   3   0   61.79    3.20 
  -5   3   0   60.09    2.90 
  -5   3   0   62.69    3.80 
  -5   3   0   64.29    3.10 
   4  -3   0  454.55   17.90 
   4  -3   0  483.85   17.90 
   4  -3   0  456.65   17.60 
   4  -3   0  491.45   17.40 
   4  -3   0  462.05   17.50 
   4  -3   0  462.25   18.00 
   4  -3   0  468.55   17.40 
   4  -3   0  466.05   17.40 
   4  -3   0  474.85   17.50 
   4  -3   0  483.75   17.70 
  -4   3   0  467.75   17.70 
  -4   3   0  456.15   16.90 
  -4   3   0  450.25   17.20 
  -4   3   0  504.05   17.10 
  -4   3   0  497.95   17.80 
  -4   3   0  478.55   17.70 
  -4   3   0  488.05   17.80 
  -4   3   0  443.96   17.70 
   3  -3   0   75.99    3.50 
   3  -3   0   79.19    3.40 
  -3   3   0   73.99    3.60 
  -3   3   0   70.89    4.60 
  -3   3   0   73.89    3.60 
  -3   3   0   72.89    3.20 
  -3   3   0   80.39    3.70 
  -3   3   0   75.29    3.70 
  -3   3   0   72.49    4.50 
  -3   3   0   72.29    3.70 
   2  -3   0  127.29    5.10 
   2  -3   0  122.39    4.70 
   2  -3   0  120.59    5.00 
   2  -3   0  124.89    5.20 
   2  -3   0  131.99    5.10 
   2  -3   0  128.79    5.20 
   2  -3   0  126.39    6.10 
  -2   3   0  125.29    5.30 
  -2   3   0  128.69    5.30 
  -2   3   0  131.79    6.20 
  -2   3   0  125.79    4.90 
  -2   3   0  130.19    5.30 
  -2   3   0  128.89    5.30 
  -2   3   0  130.29    6.40 
  -2   3   0  125.89    5.30 
   1  -3   0 2190.58   77.59 
   1  -3   0 2133.69   77.29 
   1  -3   0 2233.78   78.49 
   1  -3   0 2212.08   77.59 
   1  -3   0 2288.97   77.29 
   1  -3   0 2187.08   77.49 
   1  -3   0 2210.48   77.59 
  -1   3   0 2216.58   77.69 
  -1   3   0 2290.57   78.39 
  -1   3   0 2120.19   77.59 
  -1   3   0 2269.97   78.79 
  -1   3   0 2250.77   77.59 
  -1   3   0 2180.98   77.69 
  -1   3   0 2238.68   77.69 
  -1   3   0 2250.57   77.69 
   0  -3   0   71.09    2.90 
   0  -3   0   72.19    3.00 
   0  -3   0   67.69    2.70 
   0  -3   0   71.29    2.70 
   0  -3   0   70.69    3.00 
   0  -3   0   70.59    3.70 
   0   3   0   74.49    3.00 
   0   3   0   68.89    3.00 
   0   3   0   73.69    3.90 
   0   3   0   69.49    3.00 
   0   3   0   73.39    3.10 
   0   3   0   66.79    3.00 
   0   3   0   72.89    3.60 
  -1  -3   0 6882.71  235.78 
  -1  -3   0 7127.29  239.78 
  -1  -3   0 6716.73  237.28 
  -1  -3   0 6461.85  235.68 
   1   3   0 6939.21  239.18 
   1   3   0 6654.63  240.48 
   1   3   0 6365.06  236.58 
   1   3   0 6464.95  235.38 
   1   3   0 7091.09  236.98 
   1   3   0 6864.41  236.78 
  -2  -3   0  847.72   29.50 
  -2  -3   0  804.72   29.50 
  -2  -3   0  823.92   29.70 
  -2  -3   0  898.51   30.40 
  -2  -3   0  854.81   29.50 
   2   3   0  815.82   29.70 
   2   3   0  796.62   29.70 
   2   3   0  865.41   30.40 
   2   3   0  840.22   29.60 
   2   3   0  868.21   29.70 
  -3  -3   0 2282.17   82.09 
  -3  -3   0 2370.96   82.29 
  -3  -3   0 2563.54   82.99 
  -3  -3   0 2381.96   82.29 
  -3  -3   0 2404.16   81.99 
   3   3   0 2268.57   82.29 
   3   3   0 2254.57   82.09 
   3   3   0 2385.86   82.29 
   3   3   0 2326.77   82.29 
   3   3   0 2396.76   82.29 
   3   3   0 2281.47   82.69 
  -4  -3   0    7.80    0.90 
  -4  -3   0    9.80    0.70 
  -4  -3   0    9.90    1.30 
  -4  -3   0    9.60    0.70 
   4   3   0   11.10    1.10 
   4   3   0    7.80    0.80 
   4   3   0    9.00    0.90 
   4   3   0    8.50    1.00 
  -5  -3   0 1519.45   55.69 
  -5  -3   0 1600.14   55.79 
   5   3   0 1599.74   55.39 
  -6  -3   0  236.68    9.80 
  -6  -3   0  228.88    9.30 
   6   3   0  225.88    8.90 
   6   3   0  216.48    8.90 
   6   3   0  233.08    9.50 
   6   3   0  219.28    8.90 
   6   3   0  217.38    8.60 
   6   3   0  221.38    9.40 
   6   3   0  224.58    9.00 
   6   3   0  245.08    8.90 
   6   3   0  229.08    9.30 
  -7  -3   0  349.77   14.20 
  -7  -3   0  361.66   14.70 
   7   3   0  345.47   14.00 
   7   3   0  359.86   13.80 
   7   3   0  350.96   13.60 
   7   3   0  380.66   14.50 
   7   3   0  373.86   13.70 
   7   3   0  331.17   13.20 
   7   3   0  362.56   14.40 
   7   3   0  353.06   13.80 
   7   3   0  368.06   14.20 
   7   3   0  374.86   13.70 
  -8  -3   0  568.24   22.70 
  -8  -3   0  606.74   21.70 
  -8  -3   0  582.64   20.90 
   8   3   0  599.34   22.20 
   8   3   0  593.94   22.40 
   8   3   0  581.44   21.60 
   8   3   0  600.44   22.40 
   8   3   0  526.45   21.80 
   8   3   0  591.54   21.70 
   8   3   0  593.94   21.60 
  -9  -3   0   40.00    2.20 
   9   3   0   44.70    2.80 
   9   3   0   46.70    3.00 
   9   3   0   42.10    3.20 
   9   3   0   47.30    3.50 
   9   3   0   49.90    3.70 
   9   3   0   48.80    3.10 
   9   3   0   42.60    3.70 
  10   3   0    2.40    1.10 
  10   3   0    3.80    1.50 
  10   3   0    2.80    1.20 
  10   3   0    3.20    1.20 
   7  -4   0   90.39    4.60 
   7  -4   0   96.39    4.60 
  -7   4   0  102.69    4.40 
  -7   4   0  100.49    3.90 
   6  -4   0   80.59    4.70 
   6  -4   0   90.49    4.80 
   6  -4   0   83.59    4.60 
   6  -4   0   91.19    4.80 
   6  -4   0   88.39    4.40 
  -6   4   0   84.89    3.70 
  -6   4   0   94.69    4.60 
  -6   4   0   80.89    3.90 
  -6   4   0   83.19    3.90 
   5  -4   0  629.64   22.70 
   5  -4   0  627.24   23.10 
   5  -4   0  632.14   23.10 
   5  -4   0  588.14   22.90 
   5  -4   0  575.04   22.20 
   5  -4   0  643.04   23.40 
   5  -4   0  603.74   22.40 
  -5   4   0  614.24   22.20 
  -5   4   0  631.34   22.00 
  -5   4   0  588.04   22.90 
  -5   4   0  623.64   23.10 
  -5   4   0  601.84   22.30 
   4  -4   0  866.21   31.90 
   4  -4   0  891.31   32.00 
   4  -4   0  891.91   32.60 
   4  -4   0  867.51   31.80 
   4  -4   0  893.31   32.20 
   4  -4   0  882.51   31.80 
   4  -4   0  899.21   32.20 
   4  -4   0  909.51   32.40 
  -4   4   0  883.51   32.30 
  -4   4   0  895.21   31.30 
  -4   4   0  899.81   32.30 
  -4   4   0  845.72   32.10 
  -4   4   0  870.21   32.20 
  -4   4   0  838.92   31.60 
  -4   4   0  895.41   31.50 
   3  -4   0   48.80    3.40 
   3  -4   0   57.59    3.40 
   3  -4   0   56.69    3.00 
   3  -4   0   60.29    3.20 
   3  -4   0   57.29    3.10 
   3  -4   0   59.59    3.20 
   3  -4   0   54.39    3.00 
   3  -4   0   51.69    3.50 
   3  -4   0   56.19    3.10 
  -3   4   0   57.89    3.40 
  -3   4   0   57.99    3.30 
  -3   4   0   54.29    2.90 
  -3   4   0   54.09    3.30 
  -3   4   0   56.99    3.30 
  -3   4   0   56.99    2.80 
  -3   4   0   53.99    2.60 
  -3   4   0   57.59    3.40 
   2  -4   0   81.89    3.70 
   2  -4   0   83.69    3.90 
  -2   4   0   84.79    4.10 
  -2   4   0   83.79    4.10 
  -2   4   0   77.29    5.10 
  -2   4   0   81.79    4.00 
  -2   4   0   85.59    4.00 
  -2   4   0   87.89    4.00 
  -2   4   0   78.89    4.80 
  -2   4   0   85.19    3.50 
   1  -4   0  298.37   10.80 
   1  -4   0  302.57   11.30 
   1  -4   0  296.07   11.20 
   1  -4   0  298.17   11.10 
   1  -4   0  284.77   10.80 
   1  -4   0  280.87   12.40 
  -1   4   0  305.07   11.40 
  -1   4   0  299.87   12.30 
  -1   4   0  304.67   11.40 
  -1   4   0  315.27   11.40 
  -1   4   0  315.27   12.90 
  -1   4   0  306.97   11.40 
  -1   4   0  292.07   11.10 
  -1   4   0  291.07   10.90 
  -1   4   0  308.67   11.40 
   0  -4   0 1152.28   41.00 
   0  -4   0 1162.08   41.10 
   0  -4   0 1208.08   41.20 
   0  -4   0 1216.28   40.80 
   0  -4   0 1178.98   42.40 
   0  -4   0 1147.59   40.80 
   0   4   0 1191.08   41.20 
   0   4   0 1184.18   42.00 
   0   4   0 1147.59   41.20 
   0   4   0 1174.98   42.60 
   0   4   0 1122.09   40.90 
   0   4   0 1121.39   41.20 
   0   4   0 1073.99   41.10 
   0   4   0 1203.98   41.20 
   0   4   0 1183.08   41.10 
  -1  -4   0  851.71   29.40 
  -1  -4   0  864.81   30.40 
  -1  -4   0  812.22   29.20 
  -1  -4   0  784.92   29.00 
  -1  -4   0  845.72   28.90 
  -1  -4   0  819.02   29.00 
   1   4   0  844.72   30.50 
   1   4   0  793.82   29.30 
   1   4   0  860.11   29.20 
   1   4   0  811.12   29.90 
   1   4   0  815.22   29.30 
   1   4   0  775.92   29.00 
   1   4   0  813.72   29.30 
   1   4   0  833.92   29.20 
  -2  -4   0  524.05   19.40 
  -2  -4   0  534.45   19.20 
  -2  -4   0  554.24   19.60 
  -2  -4   0  566.74   19.20 
  -2  -4   0  562.54   20.50 
   2   4   0  526.55   19.50 
   2   4   0  525.95   19.50 
   2   4   0  550.54   20.50 
   2   4   0  562.44   19.50 
   2   4   0  558.14   19.50 
   2   4   0  537.25   19.50 
   2   4   0  511.95   19.20 
   2   4   0  545.55   20.10 
  -3  -4   0  231.48    8.10 
  -3  -4   0  233.68    9.30 
  -3  -4   0  232.68    8.50 
  -3  -4   0  199.88    8.10 
  -3  -4   0  224.38    8.10 
   3   4   0  214.18    8.40 
   3   4   0  220.18    8.30 
   3   4   0  233.38    8.40 
   3   4   0  229.38    8.50 
   3   4   0  218.28    8.40 
   3   4   0  214.38    8.10 
   3   4   0  228.58    8.40 
   3   4   0  208.08    9.10 
  -4  -4   0   37.30    2.10 
  -4  -4   0   37.70    2.60 
  -4  -4   0   35.30    1.70 
  -4  -4   0   36.40    1.70 
   4   4   0   34.10    1.80 
   4   4   0   34.60    2.10 
   4   4   0   36.80    2.00 
   4   4   0   37.70    2.10 
   4   4   0   37.10    2.10 
  -5  -4   0    2.40    1.00 
  -5  -4   0    2.60    0.50 
  -5  -4   0    5.70    1.40 
  -5  -4   0    3.20    0.60 
  -5  -4   0    2.60    0.70 
  -5  -4   0    2.60    0.50 
   5   4   0    2.20    0.80 
   5   4   0    4.30    0.80 
   5   4   0    1.50    0.60 
   5   4   0    1.80    0.80 
  -6  -4   0   33.90    2.60 
  -6  -4   0   32.00    2.00 
   6   4   0   32.70    2.00 
   6   4   0   31.20    2.20 
   6   4   0   31.40    2.70 
   6   4   0   30.50    2.50 
   6   4   0   39.00    2.30 
   6   4   0   31.10    2.20 
   6   4   0   32.10    2.30 
   6   4   0   30.70    2.10 
   6   4   0   32.50    2.70 
   6   4   0   33.20    2.20 
  -7  -4   0 1387.76   49.90 
  -7  -4   0 1357.26   47.90 
   7   4   0 1372.06   48.60 
   7   4   0 1359.16   49.30 
   7   4   0 1317.97   48.30 
   7   4   0 1341.67   48.70 
   7   4   0 1359.16   48.70 
   7   4   0 1386.96   48.60 
   7   4   0 1395.66   49.20 
   7   4   0 1387.06   49.30 
  -8  -4   0  265.37   10.80 
  -8  -4   0  247.08   11.60 
  -8  -4   0  260.07    9.90 
   8   4   0  273.57   11.40 
   8   4   0  265.27   10.60 
   8   4   0  277.47   10.80 
   8   4   0  277.07   10.60 
   8   4   0  268.97   11.40 
   8   4   0  273.77   11.20 
   8   4   0  278.67   10.70 
   8   4   0  255.47   10.20 
  -9  -4   0  257.37   11.20 
  -9  -4   0  273.87   10.60 
   9   4   0  295.27   11.20 
   9   4   0  277.27   11.80 
   9   4   0  290.37   11.20 
   9   4   0  300.87   12.00 
   9   4   0  290.67   11.30 
   9   4   0  303.57   11.80 
  10   4   0  183.98    7.80 
  10   4   0  176.98    7.70 
  10   4   0  165.48    7.00 
  10   4   0  182.78    7.20 
  10   4   0  170.98    7.50 
   6  -5   0   23.40    2.20 
   6  -5   0   20.80    2.00 
   6  -5   0   21.80    2.20 
  -6   5   0   22.60    1.50 
  -6   5   0   21.80    1.70 
  -6   5   0   24.10    2.00 
   5  -5   0  549.35   20.10 
   5  -5   0  503.15   20.10 
   5  -5   0  544.95   19.80 
  -5   5   0  564.34   20.00 
  -5   5   0  489.25   19.20 
  -5   5   0  528.05   19.50 
  -5   5   0  541.85   19.10 
   4  -5   0   26.20    3.00 
   4  -5   0   30.50    2.60 
   4  -5   0   26.10    2.60 
   4  -5   0   31.50    3.10 
   4  -5   0   31.60    2.60 
   4  -5   0   30.40    2.40 
  -4   5   0   27.80    2.20 
  -4   5   0   27.80    2.90 
  -4   5   0   30.10    2.00 
  -4   5   0   24.00    2.60 
  -4   5   0   26.40    2.10 
  -4   5   0   28.60    2.40 
  -4   5   0   23.60    2.60 
   3  -5   0  512.35   18.90 
   3  -5   0  484.35   18.60 
   3  -5   0  494.95   19.30 
   3  -5   0  497.95   18.90 
   3  -5   0  507.65   18.80 
   3  -5   0  514.35   18.70 
   3  -5   0  496.35   18.90 
   3  -5   0  489.95   19.00 
  -3   5   0  474.85   19.00 
  -3   5   0  497.45   18.10 
  -3   5   0  513.05   19.20 
  -3   5   0  502.05   18.30 
  -3   5   0  521.75   18.70 
  -3   5   0  499.25   19.10 
  -3   5   0  515.05   18.60 
  -3   5   0  533.55   19.30 
   2  -5   0   14.80    2.60 
   2  -5   0   19.00    1.80 
   2  -5   0   23.50    1.80 
   2  -5   0   20.90    1.90 
   2  -5   0   18.80    1.80 
   2  -5   0   20.10    2.00 
   2  -5   0   20.60    2.00 
  -2   5   0   20.30    1.90 
  -2   5   0   23.30    2.30 
  -2   5   0   20.50    1.60 
  -2   5   0   20.70    2.00 
  -2   5   0   19.80    1.70 
  -2   5   0   20.10    2.10 
  -2   5   0   23.60    1.80 
  -2   5   0   20.80    2.20 
  -2   5   0   20.40    2.10 
  -2   5   0   19.30    1.50 
   1  -5   0  378.76   13.30 
   1  -5   0  330.07   13.60 
   1  -5   0  348.27   13.40 
   1  -5   0  340.37   12.80 
   1  -5   0  345.37   13.40 
   1  -5   0  375.46   13.50 
   1  -5   0  338.07   12.90 
   1  -5   0  368.26   13.80 
  -1   5   0  366.16   13.60 
  -1   5   0  335.77   13.20 
  -1   5   0  390.26   13.70 
  -1   5   0  340.17   13.30 
  -1   5   0  340.67   15.30 
  -1   5   0  336.17   13.00 
  -1   5   0  360.36   13.20 
  -1   5   0  375.46   13.60 
  -1   5   0  354.76   12.90 
  -1   5   0  375.46   13.60 
  -1   5   0  386.16   13.70 
   0  -5   0   27.80    1.70 
   0  -5   0   24.70    1.40 
   0  -5   0   28.30    1.90 
   0  -5   0   24.10    2.60 
   0  -5   0   25.70    1.80 
   0  -5   0   25.50    1.40 
   0   5   0   27.80    2.00 
   0   5   0   26.10    1.90 
   0   5   0   25.60    1.90 
   0   5   0   24.50    1.60 
   0   5   0   26.40    2.90 
   0   5   0   25.80    1.90 
   0   5   0   20.40    1.90 
   0   5   0   22.90    2.50 
   0   5   0   25.90    2.00 
  -1  -5   0   87.19    3.40 
  -1  -5   0   83.19    4.90 
  -1  -5   0   88.39    3.80 
  -1  -5   0   84.79    3.90 
  -1  -5   0   87.99    3.50 
  -1  -5   0   81.19    3.50 
   1   5   0   81.89    4.60 
   1   5   0   84.89    3.90 
   1   5   0   83.29    3.80 
   1   5   0   79.39    4.90 
   1   5   0   88.29    3.90 
   1   5   0   84.99    3.80 
   1   5   0   79.29    3.50 
   1   5   0   80.99    3.80 
  -2  -5   0  613.94   22.20 
  -2  -5   0  577.74   22.20 
  -2  -5   0  598.64   22.40 
  -2  -5   0  634.24   22.20 
  -2  -5   0  651.83   22.70 
  -2  -5   0  652.33   22.20 
  -2  -5   0  627.64   23.90 
   2   5   0  648.54   22.50 
   2   5   0  604.34   22.20 
   2   5   0  630.74   22.50 
   2   5   0  622.74   22.60 
   2   5   0  642.54   22.50 
   2   5   0  643.14   22.60 
   2   5   0  620.94   23.40 
   2   5   0  607.54   24.00 
  -3  -5   0  203.38    8.30 
  -3  -5   0  219.78    8.30 
  -3  -5   0  224.78    8.20 
  -3  -5   0  219.98    9.70 
  -3  -5   0  232.08    8.20 
  -3  -5   0  227.98    8.70 
   3   5   0  216.68    8.60 
   3   5   0  227.28    8.60 
   3   5   0  226.08    8.60 
   3   5   0  222.88    8.70 
   3   5   0  222.48    8.50 
   3   5   0  209.48    8.20 
   3   5   0  231.08    8.60 
  -4  -5   0  250.97    9.40 
  -4  -5   0  257.67    9.80 
  -4  -5   0  263.47    9.40 
  -4  -5   0  250.07    9.30 
  -4  -5   0  249.28   10.80 
   4   5   0  255.27    9.70 
   4   5   0  255.37    9.70 
   4   5   0  255.47    9.60 
   4   5   0  261.97    9.80 
   4   5   0  240.78    9.40 
  -5  -5   0  256.77   10.90 
  -5  -5   0  265.57   10.40 
  -5  -5   0  263.47    9.40 
  -5  -5   0  249.68    9.40 
  -5  -5   0  249.28    9.90 
  -5  -5   0  264.47    9.50 
   5   5   0  269.07    9.90 
   5   5   0  251.77   10.10 
   5   5   0  249.48   10.10 
   5   5   0  266.87   10.00 
   5   5   0  255.47   10.10 
   5   5   0  246.48    9.60 
   5   5   0  253.17   10.00 
   5   5   0  254.97    9.70 
   5   5   0  253.67   10.30 
  -6  -5   0  508.25   18.60 
  -6  -5   0  507.85   19.70 
   6   5   0  507.05   19.60 
   6   5   0  487.25   19.20 
   6   5   0  536.15   19.10 
   6   5   0  499.25   18.70 
   6   5   0  541.65   19.70 
   6   5   0  527.35   18.90 
   6   5   0  522.65   19.60 
   6   5   0  524.85   19.20 
   6   5   0  522.05   19.40 
   6   5   0  531.85   19.20 
  -7  -5   0  323.87   12.00 
  -7  -5   0  335.07   13.90 
   7   5   0  321.87   13.20 
   7   5   0  305.97   12.30 
   7   5   0  325.77   13.00 
   7   5   0  312.17   12.70 
   7   5   0  332.67   12.60 
   7   5   0  331.07   12.80 
   7   5   0  340.07   13.30 
   7   5   0  337.47   12.80 
   7   5   0  326.97   12.30 
  -8  -5   0   29.60    1.90 
   8   5   0   29.70    2.40 
   8   5   0   35.50    2.60 
   8   5   0   26.60    2.50 
   8   5   0   29.30    3.30 
   8   5   0   30.70    2.40 
   8   5   0   27.20    2.10 
   8   5   0   30.40    3.10 
   8   5   0   29.40    3.00 
  -9  -5   0   81.29    4.40 
  -9  -5   0   83.29    3.70 
   9   5   0   88.59    5.00 
   9   5   0   88.69    5.00 
   9   5   0   81.79    4.10 
   9   5   0   78.09    4.10 
   9   5   0   83.19    4.70 
   9   5   0   81.09    4.30 
   9   5   0   84.79    4.30 
 -10  -5   0   11.90    1.20 
  10   5   0   10.20    1.40 
  10   5   0   11.10    1.50 
  10   5   0   16.80    2.20 
  10   5   0   14.20    2.00 
  10   5   0   15.10    1.90 
   5  -6   0   23.50    2.10 
   5  -6   0   24.20    1.90 
   5  -6   0   23.60    2.20 
  -5   6   0   22.00    1.90 
  -5   6   0   23.00    2.20 
   4  -6   0  271.87   10.90 
   4  -6   0  272.37   11.20 
   4  -6   0  270.97   10.80 
   4  -6   0  273.87   11.40 
  -4   6   0  284.57   10.80 
  -4   6   0  299.07   11.20 
  -4   6   0  278.57   10.30 
   3  -6   0  813.92   29.10 
   3  -6   0  776.92   29.40 
   3  -6   0  776.62   29.00 
   3  -6   0  808.72   28.80 
   3  -6   0  801.72   28.90 
   3  -6   0  785.32   29.00 
  -3   6   0  763.82   28.70 
  -3   6   0  795.92   28.70 
  -3   6   0  805.12   28.20 
  -3   6   0  791.62   29.20 
  -3   6   0  816.02   29.00 
  -3   6   0  774.62   29.20 
   2  -6   0  356.06   13.80 
   2  -6   0  350.06   13.70 
   2  -6   0  351.56   14.00 
   2  -6   0  331.87   13.40 
   2  -6   0  362.36   13.60 
   2  -6   0  364.56   13.70 
   2  -6   0  343.47   14.10 
  -2   6   0  372.26   13.50 
  -2   6   0  367.86   14.00 
  -2   6   0  347.87   13.40 
  -2   6   0  347.67   13.50 
  -2   6   0  343.77   13.80 
  -2   6   0  371.66   14.00 
  -2   6   0  345.47   13.90 
  -2   6   0  359.46   13.00 
   1  -6   0  259.37   10.30 
   1  -6   0  275.17   10.50 
   1  -6   0  266.77   10.30 
   1  -6   0  263.77   10.40 
   1  -6   0  245.78   10.10 
   1  -6   0  261.27   10.70 
  -1   6   0  274.47   10.70 
  -1   6   0  273.87   10.70 
  -1   6   0  263.27   10.30 
  -1   6   0  267.77   10.60 
  -1   6   0  263.27   10.20 
  -1   6   0  273.07   10.20 
  -1   6   0  228.98    9.80 
   0  -6   0  277.67   10.60 
   0  -6   0  271.27   10.70 
   0  -6   0  257.47   10.40 
   0  -6   0  273.37   11.00 
   0  -6   0  254.07   10.50 
   0  -6   0  260.87   10.00 
   0  -6   0  256.47   10.40 
   0  -6   0  280.67   10.10 
   0  -6   0  291.07   10.50 
   0  -6   0  281.97   10.70 
   0   6   0  270.37   10.40 
   0   6   0  281.77   10.90 
   0   6   0  271.17   10.50 
   0   6   0  272.37   10.70 
   0   6   0  284.97   10.80 
   0   6   0  280.77   10.90 
   0   6   0  274.67   10.60 
   0   6   0  258.47   10.70 
   0   6   0  265.87   10.30 
   0   6   0  284.37   10.80 
  -1  -6   0  154.48    6.30 
  -1  -6   0  156.38    6.50 
  -1  -6   0  144.09    6.20 
  -1  -6   0  150.68    6.70 
  -1  -6   0  159.08    6.40 
  -1  -6   0  154.28    5.90 
  -1  -6   0  156.18    6.10 
  -1  -6   0  164.38    6.40 
  -1  -6   0  142.89    7.90 
  -1  -6   0  152.08    5.90 
   1   6   0  161.18    6.60 
   1   6   0  145.89    6.40 
   1   6   0  141.59    6.00 
   1   6   0  146.69    6.10 
   1   6   0  154.68    6.40 
   1   6   0  156.18    6.40 
   1   6   0  140.79    8.10 
   1   6   0  163.68    6.60 
   1   6   0  143.89    6.50 
   1   6   0  151.58    6.40 
   1   6   0  148.59    6.30 
  -2  -6   0  385.16   14.00 
  -2  -6   0  411.86   14.80 
  -2  -6   0  378.56   14.40 
  -2  -6   0  370.06   14.40 
  -2  -6   0  396.96   14.40 
  -2  -6   0  369.16   14.10 
  -2  -6   0  381.26   16.20 
  -2  -6   0  405.66   14.10 
   2   6   0  364.16   16.30 
   2   6   0  382.86   14.50 
   2   6   0  409.36   14.70 
   2   6   0  395.96   14.60 
   2   6   0  411.66   14.70 
   2   6   0  411.56   14.50 
   2   6   0  365.86   14.60 
   2   6   0  374.56   14.50 
   2   6   0  408.66   14.70 
   2   6   0  356.06   15.50 
  -3  -6   0   21.60    1.90 
  -3  -6   0   22.90    1.40 
  -3  -6   0   19.30    1.80 
  -3  -6   0   26.10    2.80 
  -3  -6   0   22.90    1.90 
  -3  -6   0   20.80    1.40 
  -3  -6   0   21.70    1.60 
  -3  -6   0   20.90    1.60 
  -3  -6   0   22.90    1.50 
   3   6   0   21.60    1.90 
   3   6   0   21.80    1.80 
   3   6   0   23.30    2.80 
   3   6   0   22.00    1.90 
   3   6   0   22.90    1.90 
   3   6   0   21.80    1.70 
   3   6   0   22.90    1.90 
   3   6   0   21.70    2.20 
   3   6   0   21.40    1.70 
   3   6   0   21.40    1.80 
  -4  -6   0  231.38    8.90 
  -4  -6   0  249.18    9.00 
  -4  -6   0  233.18    8.90 
  -4  -6   0  250.57    9.60 
  -4  -6   0  222.28    9.20 
  -4  -6   0  251.67    9.10 
   4   6   0  239.18    9.60 
   4   6   0  231.18    9.50 
   4   6   0  248.68    9.30 
   4   6   0  228.88    9.30 
   4   6   0  234.78    9.00 
   4   6   0  246.78    9.40 
   4   6   0  249.28    9.50 
   4   6   0  226.38    9.30 
   4   6   0  246.18    9.40 
   4   6   0  231.48    9.30 
  -5  -6   0   74.99    3.40 
  -5  -6   0   71.19    3.20 
  -5  -6   0   81.29    3.60 
  -5  -6   0   69.69    3.60 
  -5  -6   0   72.39    3.80 
  -5  -6   0   77.59    3.40 
  -5  -6   0   79.29    4.00 
  -5  -6   0   72.99    4.10 
   5   6   0   79.89    3.60 
   5   6   0   82.59    3.80 
   5   6   0   80.89    3.90 
   5   6   0   76.49    3.80 
   5   6   0   76.39    4.10 
   5   6   0   74.69    3.60 
   5   6   0   81.19    3.90 
   5   6   0   78.89    4.20 
   5   6   0   76.39    4.00 
   5   6   0   73.29    3.70 
   5   6   0   72.89    4.00 
  -6  -6   0  295.47   11.50 
  -6  -6   0  266.97   13.70 
  -6  -6   0  306.27   11.50 
  -6  -6   0  331.37   11.70 
   6   6   0  307.27   12.10 
   6   6   0  321.17   12.50 
   6   6   0  327.67   12.40 
   6   6   0  317.37   12.00 
   6   6   0  317.97   12.30 
   6   6   0  313.47   11.80 
   6   6   0  310.97   12.20 
   6   6   0  316.67   11.70 
   6   6   0  307.47   12.50 
  -7  -6   0   16.20    1.70 
  -7  -6   0   18.00    2.80 
   7   6   0   17.30    2.00 
   7   6   0   15.50    2.00 
   7   6   0   21.30    1.90 
   7   6   0   17.20    1.80 
   7   6   0   15.40    2.10 
   7   6   0   16.90    2.40 
   7   6   0   11.60    1.40 
   7   6   0   16.70    2.00 
   7   6   0   16.10    2.40 
  -8  -6   0   58.09    3.00 
   8   6   0   60.99    3.80 
   8   6   0   61.69    4.00 
   8   6   0   66.69    4.30 
   8   6   0   57.29    3.30 
   8   6   0   52.39    3.50 
   8   6   0   55.39    3.60 
   8   6   0   60.69    4.10 
  -9  -6   0  207.08    8.20 
  -9  -6   0  207.78    8.10 
   9   6   0  211.58    9.10 
   9   6   0  218.08    9.30 
   9   6   0  211.88    8.80 
   9   6   0  218.78    8.80 
   9   6   0  214.08    9.30 
 -10  -6   0   44.90    2.20 
  10   6   0   46.70    2.60 
  10   6   0   44.20    3.10 
  10   6   0   48.40    3.30 
  10   6   0   47.80    3.10 
  10   6   0   50.59    2.80 
   4  -7   0   63.69    3.00 
   4  -7   0   67.49    3.50 
   4  -7   0   70.29    3.40 
  -4   7   0   67.79    3.40 
  -4   7   0   69.89    3.30 
   3  -7   0   55.49    3.60 
   3  -7   0   50.99    3.20 
   3  -7   0   55.89    3.30 
  -3   7   0   59.49    3.20 
  -3   7   0   56.39    3.40 
   2  -7   0   38.20    2.70 
   2  -7   0   37.90    2.60 
   2  -7   0   39.90    2.80 
   2  -7   0   40.40    3.10 
   2  -7   0   39.60    2.70 
   2  -7   0   41.10    3.40 
  -2   7   0   39.00    2.80 
  -2   7   0   42.00    3.10 
  -2   7   0   37.40    3.10 
  -2   7   0   36.90    3.00 
  -2   7   0   34.10    2.60 
  -2   7   0   40.70    2.70 
   1  -7   0  505.35   18.50 
   1  -7   0  489.35   17.90 
   1  -7   0  468.95   18.10 
   1  -7   0  503.55   18.10 
   1  -7   0  482.05   18.10 
   1  -7   0  461.95   17.80 
  -1   7   0  492.75   18.00 
  -1   7   0  465.15   17.90 
  -1   7   0  456.95   18.10 
  -1   7   0  492.75   18.40 
  -1   7   0  491.85   17.90 
  -1   7   0  479.05   18.30 
  -1   7   0  440.26   18.10 
   0  -7   0   78.19    4.20 
   0  -7   0   79.69    4.70 
   0  -7   0   81.09    4.00 
   0  -7   0   78.09    4.20 
   0  -7   0   82.19    4.00 
   0  -7   0   81.89    4.20 
   0  -7   0   83.29    4.30 
   0  -7   0   81.99    3.60 
   0  -7   0   82.69    4.10 
   0   7   0   84.29    4.50 
   0   7   0   83.19    4.40 
   0   7   0   87.09    4.30 
   0   7   0   79.29    4.40 
   0   7   0   79.49    4.40 
   0   7   0   86.59    4.20 
   0   7   0   85.09    4.10 
   0   7   0   75.99    4.30 
  -1  -7   0  583.64   22.30 
  -1  -7   0  622.94   22.00 
  -1  -7   0  595.84   22.90 
  -1  -7   0  600.44   22.70 
  -1  -7   0  595.64   22.40 
  -1  -7   0  604.34   22.20 
  -1  -7   0  633.94   22.50 
  -1  -7   0  640.04   22.60 
   1   7   0  624.04   22.80 
   1   7   0  618.04   22.60 
   1   7   0  631.04   22.80 
   1   7   0  590.44   22.50 
   1   7   0  617.14   22.50 
   1   7   0  615.94   22.20 
   1   7   0  601.84   22.50 
   1   7   0  601.64   22.70 
  -2  -7   0  854.61   31.20 
  -2  -7   0  885.01   31.30 
  -2  -7   0  865.11   31.80 
  -2  -7   0  871.31   31.60 
  -2  -7   0  901.11   30.80 
  -2  -7   0  890.91   31.30 
  -2  -7   0  824.42   30.70 
  -2  -7   0  889.41   31.30 
   2   7   0  895.21   31.50 
   2   7   0  864.11   31.30 
   2   7   0  872.41   31.30 
   2   7   0  880.61   31.20 
   2   7   0  859.21   31.30 
   2   7   0  798.92   30.90 
   2   7   0  802.22   31.30 
   2   7   0  901.91   31.60 
   2   7   0  854.31   31.50 
  -3  -7   0   55.09    3.00 
  -3  -7   0   50.09    2.50 
  -3  -7   0   53.69    2.70 
  -3  -7   0   48.50    2.60 
  -3  -7   0   55.79    3.00 
  -3  -7   0   53.49    3.20 
  -3  -7   0   58.89    3.20 
   3   7   0   52.59    3.10 
   3   7   0   53.19    3.00 
   3   7   0   52.59    3.00 
   3   7   0   52.29    3.00 
   3   7   0   52.69    3.10 
   3   7   0   55.89    3.20 
   3   7   0   48.30    3.20 
   3   7   0   56.69    3.10 
   3   7   0   52.19    3.10 
   3   7   0   50.39    3.20 
  -4  -7   0   59.09    3.30 
  -4  -7   0   52.79    3.10 
  -4  -7   0   61.29    3.10 
  -4  -7   0   61.39    3.50 
  -4  -7   0   60.99    2.90 
  -4  -7   0   55.69    2.70 
  -4  -7   0   54.69    2.80 
   4   7   0   59.79    3.50 
   4   7   0   61.19    3.30 
   4   7   0   56.39    3.40 
   4   7   0   51.99    3.10 
   4   7   0   55.69    3.40 
   4   7   0   58.49    3.20 
   4   7   0   60.29    3.40 
   4   7   0   58.29    3.70 
   4   7   0   62.39    3.40 
   4   7   0   61.19    3.30 
   4   7   0   58.29    3.30 
  -5  -7   0   59.09    3.10 
  -5  -7   0   58.49    2.80 
  -5  -7   0   51.69    3.00 
  -5  -7   0   55.29    3.40 
  -5  -7   0   58.59    2.90 
   5   7   0   51.09    3.10 
   5   7   0   53.09    3.40 
   5   7   0   55.79    3.20 
   5   7   0   55.09    3.30 
   5   7   0   56.49    3.60 
   5   7   0   54.69    3.30 
   5   7   0   54.19    3.10 
   5   7   0   50.09    3.20 
  -6  -7   0  190.48    7.30 
  -6  -7   0  172.48    7.00 
  -6  -7   0  175.38    7.00 
  -6  -7   0  167.28    7.60 
  -6  -7   0  175.38    7.30 
   6   7   0  181.08    7.70 
   6   7   0  173.28    7.60 
   6   7   0  176.78    7.50 
   6   7   0  184.28    7.50 
   6   7   0  185.68    7.20 
   6   7   0  177.08    7.90 
   6   7   0  175.48    7.90 
   6   7   0  180.28    7.80 
   6   7   0  177.78    7.80 
   6   7   0  181.48    7.20 
   6   7   0  167.48    7.10 
   6   7   0  178.28    7.50 
  -7  -7   0   91.39    4.30 
  -7  -7   0   95.09    8.10 
  -7  -7   0   85.59    4.10 
   7   7   0   95.79    5.30 
   7   7   0   84.59    4.50 
   7   7   0   82.69    4.90 
   7   7   0   95.69    5.00 
   7   7   0   93.19    4.90 
   7   7   0   95.09    4.50 
   7   7   0   89.79    4.70 
   7   7   0   95.29    4.30 
  -8  -7   0  122.09    5.20 
  -8  -7   0  134.09    5.40 
   8   7   0  120.39    6.30 
   8   7   0  123.79    5.30 
   8   7   0  119.59    6.00 
   8   7   0  119.59    6.20 
   8   7   0  124.29    5.80 
   8   7   0  126.89    5.90 
   8   7   0  121.39    5.60 
   8   7   0  124.99    6.00 
  -9  -7   0  186.48    7.50 
  -9  -7   0  186.88    7.30 
   9   7   0  198.28    8.30 
   9   7   0  188.38    8.30 
   9   7   0  189.28    8.30 
   9   7   0  185.98    8.00 
   9   7   0  194.48    7.90 
 -10  -7   0    9.60    1.00 
  10   7   0    9.80    1.70 
  10   7   0    8.00    1.10 
  10   7   0   11.80    1.40 
  10   7   0    8.00    1.40 
  10   7   0   11.60    1.60 
   3  -8   0   64.89    3.10 
   3  -8   0   46.80    3.40 
   3  -8   0   59.69    2.90 
  -3   8   0   65.89    3.00 
   2  -8   0  258.07    9.80 
   2  -8   0  243.58   10.00 
  -2   8   0  234.68    9.50 
  -2   8   0  257.87    9.70 
   1  -8   0    6.00    1.30 
   1  -8   0   11.80    1.70 
   1  -8   0   10.40    1.90 
   1  -8   0    8.50    1.70 
  -1   8   0    7.30    1.40 
  -1   8   0    9.80    1.60 
   0  -8   0  158.18    7.30 
   0  -8   0  160.68    7.00 
   0  -8   0  160.08    6.90 
   0  -8   0  145.19    6.60 
   0   8   0  163.78    7.20 
   0   8   0  156.18    7.10 
   0   8   0  148.09    7.00 
   0   8   0  163.88    6.70 
   0   8   0  151.08    7.00 
   0   8   0  169.18    6.90 
  -1  -8   0  351.26   13.50 
  -1  -8   0  335.67   13.20 
  -1  -8   0  357.56   13.60 
  -1  -8   0  334.47   13.40 
  -1  -8   0  344.27   14.10 
  -1  -8   0  336.57   13.00 
  -1  -8   0  352.96   13.70 
   1   8   0  354.06   13.80 
   1   8   0  357.56   15.50 
   1   8   0  347.57   13.30 
   1   8   0  361.06   13.90 
   1   8   0  359.06   13.90 
   1   8   0  347.77   13.70 
   1   8   0  355.36   13.60 
   1   8   0  370.06   13.60 
  -2  -8   0  719.23   25.30 
  -2  -8   0  695.43   24.70 
  -2  -8   0  701.03   25.70 
  -2  -8   0  685.23   25.20 
  -2  -8   0  646.64   25.40 
  -2  -8   0  678.13   25.10 
  -2  -8   0  708.33   25.20 
   2   8   0  722.63   25.50 
   2   8   0  715.93   25.60 
   2   8   0  676.53   25.30 
   2   8   0  642.44   25.20 
   2   8   0  709.63   25.60 
   2   8   0  583.74   25.70 
   2   8   0  693.23   25.30 
   2   8   0  715.13   25.20 
  -3  -8   0  562.44   21.00 
  -3  -8   0  570.34   21.00 
  -3  -8   0  588.54   21.10 
  -3  -8   0  529.85   21.40 
  -3  -8   0  585.14   20.70 
  -3  -8   0  573.34   21.10 
   3   8   0  584.64   21.50 
   3   8   0  578.84   21.20 
   3   8   0  570.14   21.00 
   3   8   0  575.54   21.10 
   3   8   0  548.65   21.10 
   3   8   0  548.85   21.10 
   3   8   0  533.55   21.00 
   3   8   0  578.34   21.40 
   3   8   0  600.94   21.40 
  -4  -8   0   82.89    4.30 
  -4  -8   0   85.79    3.80 
  -4  -8   0   79.69    4.30 
  -4  -8   0   80.79    3.60 
  -4  -8   0   75.89    4.40 
   4   8   0   77.19    4.10 
   4   8   0   85.09    4.50 
   4   8   0   84.49    4.40 
   4   8   0   78.69    4.30 
   4   8   0   83.49    4.20 
   4   8   0   80.29    4.30 
   4   8   0   79.99    4.30 
   4   8   0   77.49    4.00 
  -5  -8   0  128.59    5.10 
  -5  -8   0  129.39    5.70 
  -5  -8   0  105.29    5.60 
  -5  -8   0  113.49    5.00 
  -5  -8   0  113.69    5.20 
  -5  -8   0  118.69    5.50 
   5   8   0  117.39    5.40 
   5   8   0  112.99    5.70 
   5   8   0  122.39    5.20 
   5   8   0  126.89    5.90 
   5   8   0  111.29    5.40 
   5   8   0  120.69    5.50 
   5   8   0  117.39    5.60 
   5   8   0  127.79    5.90 
   5   8   0  118.09    5.60 
  -6  -8   0   23.90    2.20 
  -6  -8   0   27.70    2.60 
  -6  -8   0   25.50    1.80 
  -6  -8   0   28.50    2.10 
  -6  -8   0   22.80    2.20 
   6   8   0   28.60    2.20 
   6   8   0   27.10    2.40 
   6   8   0   24.20    2.10 
   6   8   0   24.20    2.30 
   6   8   0   26.00    2.30 
   6   8   0   27.30    2.90 
   6   8   0   26.90    2.70 
   6   8   0   22.00    2.00 
  -7  -8   0   29.30    2.30 
  -7  -8   0   26.70    2.10 
  -7  -8   0   27.50    2.30 
   7   8   0   20.20    2.60 
   7   8   0   26.10    2.20 
   7   8   0   27.60    2.30 
   7   8   0   25.90    2.40 
   7   8   0   29.40    2.20 
   7   8   0   27.30    2.70 
   7   8   0   27.00    2.80 
   7   8   0   28.60    2.80 
  -8  -8   0  175.18    7.20 
  -8  -8   0  180.98    7.00 
   8   8   0  190.18    7.80 
   8   8   0  176.98    7.40 
   8   8   0  184.48    7.80 
   8   8   0  178.18    7.60 
   8   8   0  159.28    7.70 
  -9  -8   0  123.69    4.70 
  -9  -8   0  111.29    4.80 
   9   8   0  110.09    5.30 
   9   8   0  117.09    5.20 
   9   8   0  108.49    5.30 
   9   8   0  112.49    5.00 
 -10  -8   0   90.59    3.70 
   1  -9   0   39.40    2.40 
   1  -9   0   38.60    2.70 
  -1   9   0   39.50    2.40 
  -1   9   0   40.30    2.40 
   0  -9   0    3.50    2.10 
   0  -9   0    3.20    1.20 
   0  -9   0    2.50    1.30 
   0   9   0    5.20    1.40 
   0   9   0    5.50    1.30 
   0   9   0    4.60    1.20 
  -1  -9   0    3.70    1.30 
  -1  -9   0    3.50    1.20 
  -1  -9   0    4.40    1.60 
   1   9   0    4.40    1.10 
   1   9   0    3.90    1.20 
   1   9   0    3.50    1.10 
   1   9   0    4.60    1.50 
  -2  -9   0  355.06   13.20 
  -2  -9   0  368.46   13.40 
  -2  -9   0  335.67   13.30 
  -2  -9   0  331.17   12.80 
  -2  -9   0  339.07   13.10 
  -2  -9   0  336.37   13.70 
   2   9   0  319.07   13.10 
   2   9   0  362.96   13.30 
   2   9   0  372.66   13.70 
   2   9   0  355.46   13.40 
   2   9   0  322.77   13.30 
   2   9   0  328.77   13.50 
   2   9   0  346.17   13.60 
  -3  -9   0  112.39    5.00 
  -3  -9   0  105.29    4.90 
  -3  -9   0   98.59    4.40 
  -3  -9   0  107.49    5.00 
   3   9   0  102.99    4.90 
   3   9   0   98.89    5.10 
   3   9   0   96.09    4.90 
   3   9   0  100.79    5.20 
   3   9   0   98.19    4.80 
   3   9   0  104.29    5.10 
   3   9   0   93.39    5.10 
  -4  -9   0   35.10    2.70 
  -4  -9   0   30.10    2.00 
  -4  -9   0   35.10    2.60 
  -4  -9   0   36.80    2.80 
   4   9   0   34.40    2.70 
   4   9   0   34.20    2.30 
   4   9   0   32.40    2.50 
   4   9   0   31.70    2.40 
   4   9   0   37.80    2.90 
   4   9   0   33.20    2.70 
   4   9   0   23.60    2.60 
   4   9   0   32.10    2.60 
  -5  -9   0  136.49    5.80 
  -5  -9   0  151.88    6.60 
  -5  -9   0  158.58    6.70 
  -5  -9   0  143.09    6.10 
   5   9   0  157.58    6.30 
   5   9   0  151.08    6.80 
   5   9   0  157.98    6.90 
   5   9   0  154.48    6.60 
   5   9   0  136.89    6.40 
   5   9   0  154.88    6.80 
  -6  -9   0   78.69    3.50 
  -6  -9   0   81.99    4.20 
  -6  -9   0   78.49    4.00 
  -6  -9   0   75.79    3.70 
   6   9   0   74.69    4.10 
   6   9   0   70.89    3.80 
   6   9   0   78.39    4.30 
   6   9   0   75.99    3.80 
   6   9   0   76.69    3.80 
   6   9   0   78.09    4.00 
  -7  -9   0  125.39    5.00 
  -7  -9   0  109.39    5.10 
  -7  -9   0  113.99    5.30 
  -7  -9   0  132.49    5.70 
   7   9   0  123.39    5.80 
   7   9   0  118.19    5.40 
   7   9   0  126.69    5.20 
   7   9   0  118.29    5.50 
  -8  -9   0    2.00    0.80 
  -8  -9   0    1.10    1.20 
  -8  -9   0   -0.10    1.60 
   8   9   0    2.80    0.90 
   8   9   0    1.80    1.10 
   8   9   0    0.90    1.00 
   8   9   0    1.40    1.20 
  -9  -9   0   38.90    1.90 
  -9  -9   0   37.70    2.40 
   9   9   0   39.10    2.40 
   9   9   0   36.00    2.50 
  -1 -10   0  173.48    6.90 
  -1 -10   0  165.38    7.20 
   1  10   0  166.58    7.10 
   1  10   0  180.08    7.00 
  -2 -10   0  145.29    6.00 
  -2 -10   0  125.29    5.60 
  -2 -10   0  135.59    6.30 
   2  10   0  144.09    5.90 
   2  10   0  139.99    6.10 
   2  10   0  134.59    5.90 
  -3 -10   0  146.19    6.40 
  -3 -10   0  146.29    6.30 
   3  10   0  151.08    6.50 
   3  10   0  154.08    6.60 
   3  10   0  152.68    6.30 
  -4 -10   0   74.59    3.80 
  -4 -10   0   77.59    4.00 
  -4 -10   0   79.89    4.00 
   4  10   0   86.39    4.10 
   4  10   0   75.09    3.80 
   4  10   0   73.99    3.50 
   4  10   0   81.19    4.10 
  -5 -10   0   10.50    1.40 
  -5 -10   0   14.10    1.70 
  -5 -10   0   11.80    1.60 
   5  10   0    9.80    1.50 
   5  10   0    7.60    1.30 
   5  10   0   12.50    1.50 
   5  10   0   12.60    1.70 
   5  10   0    9.00    1.20 
   5  10   0   15.60    2.00 
  -6 -10   0   75.69    3.70 
  -6 -10   0   74.09    3.70 
  -6 -10   0   72.39    3.70 
   6  10   0   70.09    3.70 
   6  10   0   71.39    3.80 
   6  10   0   67.59    3.30 
   6  10   0   71.09    3.40 
  -7 -10   0   44.60    2.50 
  -7 -10   0   38.80    2.50 
  -7 -10   0   43.90    2.60 
   7  10   0   44.60    2.80 
   7  10   0   38.60    2.40 
   7  10   0   44.80    2.30 
  -8 -10   0    0.10    1.30 
  -8 -10   0    1.30    0.80 
   8  10   0    1.60    0.60 
  -4 -11   0  264.97   10.40 
  -4 -11   0  305.67   10.80 
   4  11   0  259.27   10.20 
   4  11   0  218.08    9.80 
  -5 -11   0   20.70    1.70 
  -5 -11   0   19.50    1.90 
   5  11   0   19.00    1.80 
   5  11   0   22.00    2.10 
  -6 -11   0   56.99    3.40 
   7  10  -1   28.40    1.80 
  -7 -10   1   30.20    2.20 
  -7 -10   1   29.30    2.10 
  -7 -10   1   28.60    2.00 
   6  10  -1  270.97   10.40 
   6  10  -1  265.87   10.00 
  -6 -10   1  263.57   10.30 
  -6 -10   1  274.77   10.30 
  -6 -10   1  260.17   10.30 
   5  10  -1  277.77   10.40 
   5  10  -1  281.07   10.80 
   5  10  -1  267.97   10.70 
   5  10  -1  271.57   10.50 
  -5 -10   1  294.77   10.70 
  -5 -10   1  292.27   10.70 
  -5 -10   1  257.77   10.60 
   4  10  -1   42.50    2.40 
   4  10  -1   48.60    2.90 
   4  10  -1   46.10    2.70 
   4  10  -1   48.00    2.90 
  -4 -10   1   50.19    2.90 
  -4 -10   1   47.00    2.90 
  -4 -10   1   43.40    2.70 
   3  10  -1  108.09    4.90 
   3  10  -1  113.19    5.10 
   3  10  -1  112.89    5.00 
  -3 -10   1  106.59    4.80 
  -3 -10   1  112.69    5.00 
  -3 -10   1  108.89    4.90 
   2  10  -1    4.10    1.10 
   2  10  -1    5.10    1.00 
   2  10  -1    4.90    1.30 
  -2 -10   1    3.30    1.00 
  -2 -10   1    4.20    1.10 
   1  10  -1  123.69    5.30 
   1  10  -1  115.99    5.10 
  -1 -10   1  126.99    5.20 
  -9  -9   1   18.40    1.50 
   8   9  -1   56.49    2.80 
   8   9  -1   53.59    3.10 
  -8  -9   1   56.59    2.60 
  -8  -9   1   58.89    3.10 
   7   9  -1   86.09    4.20 
   7   9  -1   88.49    3.90 
   7   9  -1   84.69    4.40 
   7   9  -1   82.89    4.10 
  -7  -9   1   89.69    3.70 
  -7  -9   1   74.09    3.90 
  -7  -9   1   75.99    3.80 
  -7  -9   1   87.19    4.20 
   6   9  -1  310.77   11.90 
   6   9  -1  283.27   11.60 
   6   9  -1  300.07   12.00 
   6   9  -1  304.97   11.50 
  -6  -9   1  301.37   11.20 
  -6  -9   1  306.47   11.80 
  -6  -9   1  301.07   11.70 
   5   9  -1   23.50    2.00 
   5   9  -1   23.10    2.20 
   5   9  -1   26.00    2.40 
   5   9  -1   22.70    2.00 
   5   9  -1   16.40    2.00 
   5   9  -1   20.60    2.00 
   5   9  -1   22.40    2.20 
  -5  -9   1   20.50    1.60 
  -5  -9   1   24.40    2.40 
  -5  -9   1   23.10    2.30 
  -5  -9   1   22.50    1.80 
  -5  -9   1   23.30    2.20 
   4   9  -1  124.99    5.60 
   4   9  -1  130.99    5.90 
   4   9  -1  136.79    5.90 
   4   9  -1  118.69    5.80 
   4   9  -1  111.29    5.40 
   4   9  -1  122.19    5.80 
   4   9  -1  124.29    5.40 
  -4  -9   1  130.19    5.80 
  -4  -9   1  127.09    5.80 
  -4  -9   1  127.99    5.80 
  -4  -9   1  121.29    5.20 
   3   9  -1   56.89    3.50 
   3   9  -1   52.99    3.40 
   3   9  -1   53.49    3.20 
   3   9  -1   51.09    2.80 
   3   9  -1   52.39    3.30 
   3   9  -1   48.30    3.30 
  -3  -9   1   47.70    2.70 
  -3  -9   1   50.59    3.20 
  -3  -9   1   49.80    3.30 
  -3  -9   1   49.10    3.30 
   2   9  -1  129.29    6.00 
   2   9  -1  132.39    6.20 
   2   9  -1  127.89    5.90 
  -2  -9   1  128.29    5.80 
  -2  -9   1  134.19    6.00 
  -2  -9   1  135.39    5.90 
   1   9  -1   22.80    2.50 
   1   9  -1   24.60    2.20 
   1   9  -1   24.60    2.20 
  -1  -9   1   22.20    2.10 
  -1  -9   1   24.50    2.60 
  -1  -9   1   25.30    2.30 
  -1  -9   1   22.60    2.20 
   0   9  -1  106.39    4.80 
   0   9  -1  117.69    5.10 
   0   9  -1  111.59    5.30 
   0  -9   1  110.99    5.40 
   0  -9   1  111.29    5.10 
  -1   9  -1  154.08    6.20 
  -1   9  -1  148.19    6.10 
   1  -9   1  159.48    6.40 
   9   8  -1   12.30    1.60 
   9   8  -1   15.50    1.80 
   9   8  -1   19.30    1.70 
   9   8  -1   19.40    1.80 
  -9  -8   1   15.50    1.60 
  -9  -8   1   18.20    1.40 
   8   8  -1  386.06   14.20 
   8   8  -1  386.76   14.70 
   8   8  -1  360.26   14.40 
   8   8  -1  389.06   14.80 
   8   8  -1  359.16   14.80 
   8   8  -1  404.86   14.90 
  -8  -8   1  405.86   14.10 
  -8  -8   1  377.36   14.20 
   7   8  -1   21.20    1.90 
   7   8  -1   17.70    2.20 
   7   8  -1   18.20    2.00 
   7   8  -1   19.90    2.30 
   7   8  -1   22.20    2.10 
   7   8  -1   23.00    2.00 
   7   8  -1   21.60    2.10 
   7   8  -1   22.20    2.40 
  -7  -8   1   20.60    1.80 
  -7  -8   1   21.20    2.10 
  -7  -8   1   25.10    2.10 
   6   8  -1   45.00    2.90 
   6   8  -1   50.29    3.60 
   6   8  -1   47.50    3.10 
   6   8  -1   47.00    3.10 
   6   8  -1   49.50    3.60 
   6   8  -1   44.10    3.40 
   6   8  -1   48.40    2.90 
  -6  -8   1   49.10    2.70 
  -6  -8   1   43.30    2.60 
  -6  -8   1   47.80    2.90 
  -6  -8   1   49.90    3.30 
  -6  -8   1   51.79    3.00 
   5   8  -1  201.78    8.60 
   5   8  -1  192.98    8.30 
   5   8  -1  190.78    8.10 
   5   8  -1  206.48    8.70 
   5   8  -1  194.98    7.90 
   5   8  -1  191.58    8.10 
   5   8  -1  190.08    8.00 
  -5  -8   1  200.48    8.30 
  -5  -8   1  190.88    7.90 
  -5  -8   1  187.68    7.70 
  -5  -8   1  199.38    8.20 
  -5  -8   1  207.98    7.70 
   4   8  -1  165.98    7.00 
   4   8  -1  166.88    7.30 
   4   8  -1  164.98    6.70 
   4   8  -1  159.38    7.30 
   4   8  -1  163.48    7.10 
   4   8  -1  161.68    6.90 
   4   8  -1  164.08    7.30 
  -4  -8   1  170.58    6.50 
  -4  -8   1  163.58    7.10 
  -4  -8   1  163.68    6.60 
  -4  -8   1  164.38    7.10 
  -4  -8   1  154.88    7.40 
   3   8  -1  210.98    9.00 
   3   8  -1  203.08    8.60 
   3   8  -1  213.88    8.70 
   3   8  -1  214.08    9.10 
   3   8  -1  207.38    8.80 
   3   8  -1  211.78    8.30 
   3   8  -1  214.38    8.90 
   3   8  -1  219.68    8.90 
  -3  -8   1  204.98    9.10 
  -3  -8   1  219.28    8.70 
  -3  -8   1  192.58    8.60 
  -3  -8   1  212.78    8.30 
  -3  -8   1  216.18    8.80 
  -3  -8   1  224.18    8.80 
   2   8  -1  225.98    9.30 
   2   8  -1  223.18    9.30 
   2   8  -1  209.68    8.40 
   2   8  -1  222.18    9.20 
   2   8  -1  214.78    8.80 
   2   8  -1  224.78    9.10 
   2   8  -1  214.68    8.90 
  -2  -8   1  204.58    8.90 
  -2  -8   1  221.28    9.00 
  -2  -8   1  213.78    8.90 
  -2  -8   1  213.28    8.40 
  -2  -8   1  216.08    8.90 
   1   8  -1  225.88    9.40 
   1   8  -1  229.68    9.10 
   1   8  -1  217.48    9.30 
   1   8  -1  222.78    9.10 
   1   8  -1  231.58    9.70 
   1   8  -1  219.58    9.50 
   1   8  -1  213.38    8.80 
  -1  -8   1  214.28    9.00 
  -1  -8   1  230.78    9.10 
  -1  -8   1  215.38    9.60 
  -1  -8   1  227.58    9.20 
  -1  -8   1  216.48    8.50 
  -1  -8   1  223.98    9.20 
   0   8  -1    2.00    1.10 
   0   8  -1    1.30    1.20 
   0   8  -1    0.80    1.20 
   0   8  -1    3.90    1.20 
   0   8  -1    1.90    1.20 
   0  -8   1    1.00    1.00 
   0  -8   1   -1.00    1.10 
   0  -8   1    0.00    1.30 
   0  -8   1    2.60    1.20 
   0  -8   1    0.50    1.00 
   0  -8   1    1.60    0.90 
  -1   8  -1   10.40    1.50 
  -1   8  -1    9.30    1.50 
  -1   8  -1    7.50    2.30 
   1  -8   1    9.30    1.30 
   1  -8   1   10.50    1.60 
   1  -8   1   12.50    2.00 
  -2   8  -1   18.00    1.70 
  -2   8  -1   15.80    1.70 
   2  -8   1   21.00    1.90 
  -3   8  -1   34.20    2.10 
   3  -8   1   30.40    2.20 
   3  -8   1   30.30    2.00 
   3  -8   1   31.90    2.10 
  10   7  -1   47.90    2.70 
  10   7  -1   58.79    3.50 
  10   7  -1   46.40    2.90 
   9   7  -1  134.79    5.90 
   9   7  -1  133.59    6.30 
   9   7  -1  141.89    6.30 
   9   7  -1  147.59    6.10 
   9   7  -1  139.39    6.40 
  -9  -7   1  132.99    5.60 
  -9  -7   1  130.19    5.40 
   8   7  -1   78.59    4.20 
   8   7  -1   82.29    4.50 
   8   7  -1   80.99    4.10 
   8   7  -1   75.59    4.60 
   8   7  -1   88.19    4.50 
   8   7  -1   88.99    4.80 
   8   7  -1   81.39    4.80 
  -8  -7   1   82.99    3.80 
  -8  -7   1   77.89    3.90 
   7   7  -1  188.28    8.40 
   7   7  -1  186.38    8.10 
   7   7  -1  193.58    8.00 
   7   7  -1  198.58    7.80 
   7   7  -1  202.28    8.50 
   7   7  -1  192.58    8.50 
   7   7  -1  186.28    8.60 
   7   7  -1  198.08    8.30 
  -7  -7   1  196.88    7.80 
  -7  -7   1  183.28    7.50 
   6   7  -1  189.08    7.70 
   6   7  -1  185.58    8.10 
   6   7  -1  170.28    8.10 
   6   7  -1  184.08    7.90 
   6   7  -1  192.68    7.50 
   6   7  -1  182.18    7.80 
   6   7  -1  183.98    7.70 
   6   7  -1  188.78    8.20 
  -6  -7   1  186.08    7.30 
  -6  -7   1  183.88    7.20 
  -6  -7   1  172.98    7.50 
  -6  -7   1  193.18    7.50 
  -6  -7   1  167.38    7.80 
   5   7  -1  319.67   12.90 
   5   7  -1  330.07   13.00 
   5   7  -1  304.07   12.30 
   5   7  -1  332.17   12.50 
   5   7  -1  334.07   12.30 
   5   7  -1  324.87   12.70 
   5   7  -1  321.67   12.60 
   5   7  -1  331.07   13.00 
   5   7  -1  319.07   12.60 
  -5  -7   1  311.67   12.80 
  -5  -7   1  323.37   12.50 
  -5  -7   1  322.77   12.30 
  -5  -7   1  331.67   12.10 
  -5  -7   1  339.07   12.10 
   4   7  -1  149.39    6.70 
   4   7  -1  151.48    6.60 
   4   7  -1  146.19    6.50 
   4   7  -1  145.19    6.30 
   4   7  -1  140.29    6.20 
   4   7  -1  138.49    6.20 
   4   7  -1  155.28    6.30 
   4   7  -1  146.49    7.30 
   4   7  -1  146.19    6.70 
   4   7  -1  139.09    6.40 
   4   7  -1  139.19    6.30 
   4   7  -1  149.19    6.10 
  -4  -7   1  148.69    5.90 
  -4  -7   1  144.09    6.60 
  -4  -7   1  142.79    6.30 
  -4  -7   1  157.28    6.20 
  -4  -7   1  152.68    6.00 
  -4  -7   1  151.68    6.40 
   3   7  -1  567.04   20.90 
   3   7  -1  573.04   20.90 
   3   7  -1  568.74   20.90 
   3   7  -1  586.74   21.10 
   3   7  -1  554.04   20.70 
   3   7  -1  485.75   22.00 
   3   7  -1  572.14   20.80 
   3   7  -1  558.24   20.60 
   3   7  -1  571.14   20.60 
   3   7  -1  531.05   20.60 
  -3  -7   1  559.84   20.70 
  -3  -7   1  552.34   20.60 
  -3  -7   1  555.64   20.40 
  -3  -7   1  550.74   20.20 
  -3  -7   1  585.84   21.10 
  -3  -7   1  601.44   20.30 
  -3  -7   1  550.24   20.70 
   2   7  -1  293.67   11.60 
   2   7  -1  300.77   11.70 
   2   7  -1  308.47   11.80 
   2   7  -1  274.07   11.70 
   2   7  -1  289.57   11.60 
   2   7  -1  311.47   12.00 
   2   7  -1  309.47   12.00 
   2   7  -1  302.77   11.90 
  -2  -7   1  309.17   11.30 
  -2  -7   1  309.67   11.80 
  -2  -7   1  303.37   11.70 
  -2  -7   1  308.37   12.00 
  -2  -7   1  300.37   11.70 
  -2  -7   1  293.37   11.70 
   1   7  -1   37.60    2.80 
   1   7  -1   32.20    2.50 
   1   7  -1   34.30    2.60 
   1   7  -1   37.40    2.90 
   1   7  -1   37.50    2.80 
   1   7  -1   39.00    2.40 
   1   7  -1   36.90    2.50 
   1   7  -1   37.20    2.60 
  -1  -7   1   39.40    2.60 
  -1  -7   1   41.50    2.80 
  -1  -7   1   37.30    3.10 
  -1  -7   1   37.40    2.60 
  -1  -7   1   34.50    2.50 
  -1  -7   1   34.10    2.30 
  -1  -7   1   33.60    2.60 
  -1  -7   1   38.30    2.20 
   0   7  -1  642.64   23.50 
   0   7  -1  603.44   23.50 
   0   7  -1  630.54   23.30 
   0   7  -1  667.53   23.40 
   0   7  -1  672.23   23.80 
   0   7  -1  647.04   23.70 
   0   7  -1  604.14   23.30 
   0   7  -1  649.24   23.20 
   0  -7   1  648.54   23.30 
   0  -7   1  663.43   23.40 
   0  -7   1  676.73   23.60 
   0  -7   1  537.25   23.90 
   0  -7   1  629.64   23.20 
   0  -7   1  618.84   22.70 
   0  -7   1  625.04   23.80 
  -1   7  -1  113.09    5.40 
  -1   7  -1  103.49    5.40 
  -1   7  -1  121.49    5.40 
  -1   7  -1  114.69    5.70 
  -1   7  -1  115.89    5.30 
  -1   7  -1  115.89    5.70 
  -1   7  -1   95.19    6.20 
  -1   7  -1  111.89    5.60 
   1  -7   1  124.39    5.90 
   1  -7   1  114.19    5.20 
   1  -7   1  122.69    5.50 
   1  -7   1  118.29    5.50 
   1  -7   1  115.59    5.30 
  -2   7  -1  126.09    5.60 
  -2   7  -1  128.59    6.20 
  -2   7  -1  120.49    5.90 
  -2   7  -1  123.29    5.80 
  -2   7  -1  121.59    6.00 
  -2   7  -1  136.89    5.70 
   2  -7   1  116.49    8.00 
   2  -7   1  131.99    5.70 
   2  -7   1  136.99    5.90 
   2  -7   1  137.39    6.30 
   2  -7   1  121.49    5.60 
   2  -7   1  131.99    5.90 
  -3   7  -1  165.08    7.00 
  -3   7  -1  167.28    6.80 
   3  -7   1  153.48    6.80 
  -4   7  -1   10.50    1.40 
  -4   7  -1   11.20    1.30 
   4  -7   1    9.60    1.10 
   4  -7   1   11.50    1.40 
   4  -7   1   11.50    1.50 
  10   6  -1   32.70    2.60 
  10   6  -1   32.80    2.10 
  10   6  -1   36.20    2.60 
  10   6  -1   29.30    2.60 
 -10  -6   1   30.00    1.70 
   9   6  -1   20.50    2.10 
   9   6  -1   27.20    2.80 
   9   6  -1   22.10    2.50 
   9   6  -1   24.10    2.30 
   9   6  -1   24.20    2.60 
  -9  -6   1   24.40    1.70 
   8   6  -1  121.39    5.70 
   8   6  -1  123.09    6.10 
   8   6  -1  126.19    6.30 
   8   6  -1  129.49    5.90 
   8   6  -1  126.29    6.40 
   8   6  -1  112.29    5.60 
   8   6  -1  110.49    5.20 
   8   6  -1  120.99    5.50 
  -8  -6   1  124.39    5.10 
   7   6  -1  294.57   12.20 
   7   6  -1  293.17   12.40 
   7   6  -1  309.67   12.20 
   7   6  -1  306.37   11.60 
   7   6  -1  304.87   12.40 
   7   6  -1  305.87   12.60 
   7   6  -1  308.47   11.90 
   7   6  -1  309.57   12.10 
  -7  -6   1  307.47   11.50 
   6   6  -1   71.49    4.40 
   6   6  -1   70.79    4.20 
   6   6  -1   69.69    3.80 
   6   6  -1   69.99    3.70 
   6   6  -1   77.29    4.10 
   6   6  -1   70.99    4.20 
   6   6  -1   73.99    4.10 
   6   6  -1   76.29    3.70 
   6   6  -1   72.89    3.60 
   6   6  -1   76.29    3.60 
  -6  -6   1   73.99    3.30 
  -6  -6   1   68.49    4.10 
  -6  -6   1   75.09    3.50 
   5   6  -1  101.69    5.30 
   5   6  -1  104.39    4.60 
   5   6  -1  110.59    5.10 
   5   6  -1  102.09    4.80 
   5   6  -1  115.59    5.00 
   5   6  -1  102.69    4.80 
   5   6  -1  102.99    4.90 
   5   6  -1  110.69    5.20 
   5   6  -1  108.69    4.60 
   5   6  -1  106.29    5.00 
   5   6  -1  100.99    5.20 
   5   6  -1  104.99    4.60 
   5   6  -1  106.19    4.80 
  -5  -6   1  102.59    4.30 
  -5  -6   1  111.69    4.60 
  -5  -6   1  101.69    4.40 
  -5  -6   1  112.89    4.50 
  -5  -6   1  107.29    5.10 
  -5  -6   1   97.19    4.60 
   4   6  -1   86.89    4.20 
   4   6  -1   81.69    3.90 
   4   6  -1   85.79    4.00 
   4   6  -1   89.09    4.00 
   4   6  -1   87.09    4.10 
   4   6  -1   83.49    4.00 
   4   6  -1   81.89    4.30 
   4   6  -1   84.79    4.30 
   4   6  -1   85.49    4.00 
   4   6  -1   86.89    4.10 
   4   6  -1   86.29    4.50 
  -4  -6   1   88.79    3.90 
  -4  -6   1   85.39    3.60 
  -4  -6   1   89.19    4.30 
  -4  -6   1   80.99    3.90 
  -4  -6   1   91.59    3.70 
  -4  -6   1   81.19    3.70 
   3   6  -1    0.50    0.70 
   3   6  -1    0.60    0.80 
   3   6  -1    1.60    1.00 
   3   6  -1    3.30    1.00 
   3   6  -1    2.20    1.30 
   3   6  -1    1.50    0.70 
   3   6  -1    2.20    0.80 
   3   6  -1    1.90    1.00 
   3   6  -1    0.80    0.80 
   3   6  -1    3.70    1.00 
   3   6  -1    1.40    0.80 
  -3  -6   1    0.90    0.90 
  -3  -6   1    0.40    0.70 
  -3  -6   1    2.00    0.70 
  -3  -6   1    1.00    0.70 
  -3  -6   1    1.40    0.90 
  -3  -6   1    1.90    0.70 
  -3  -6   1    2.10    0.90 
  -3  -6   1    1.60    0.90 
   2   6  -1  326.97   12.80 
   2   6  -1  333.87   12.70 
   2   6  -1  350.46   12.90 
   2   6  -1  347.47   12.70 
   2   6  -1  351.66   13.00 
   2   6  -1  335.97   12.70 
   2   6  -1  315.27   12.60 
   2   6  -1  317.67   12.70 
  -2  -6   1  332.17   12.40 
  -2  -6   1  360.26   13.00 
  -2  -6   1  336.17   12.30 
  -2  -6   1  346.47   12.70 
  -2  -6   1  343.17   12.70 
  -2  -6   1  314.97   12.60 
  -2  -6   1  316.77   12.20 
  -2  -6   1  364.66   12.40 
  -2  -6   1  318.27   12.40 
   1   6  -1   67.59    5.20 
   1   6  -1   81.79    4.00 
   1   6  -1   78.59    3.80 
   1   6  -1   73.69    3.70 
   1   6  -1   76.39    3.80 
   1   6  -1   77.49    3.90 
   1   6  -1   84.79    4.00 
   1   6  -1   77.39    3.70 
   1   6  -1   69.49    3.70 
   1   6  -1   73.59    3.60 
  -1  -6   1   77.89    3.70 
  -1  -6   1   74.09    3.70 
  -1  -6   1   79.89    3.40 
  -1  -6   1   80.79    3.80 
  -1  -6   1   83.79    3.60 
  -1  -6   1   82.89    4.30 
  -1  -6   1   79.19    3.90 
  -1  -6   1   73.19    3.30 
  -1  -6   1   74.29    3.70 
   0   6  -1  133.29    5.90 
   0   6  -1  124.69    5.60 
   0   6  -1  119.39    5.30 
   0   6  -1  125.19    5.40 
   0   6  -1  123.69    5.60 
   0   6  -1  124.39    5.40 
   0   6  -1  122.79    5.50 
   0   6  -1  128.89    5.80 
   0   6  -1  123.29    5.70 
   0  -6   1  120.39    5.80 
   0  -6   1  136.49    5.40 
   0  -6   1  136.29    5.70 
   0  -6   1  123.19    5.60 
   0  -6   1  124.19    5.50 
   0  -6   1  120.49    5.00 
   0  -6   1  117.29    4.90 
   0  -6   1  125.59    5.50 
   0  -6   1  120.49    5.40 
  -1   6  -1  522.45   19.00 
  -1   6  -1  503.35   19.10 
  -1   6  -1  561.64   19.60 
  -1   6  -1  529.85   19.40 
  -1   6  -1  525.35   19.30 
  -1   6  -1  453.05   19.20 
  -1   6  -1  505.65   19.10 
  -1   6  -1  549.15   19.60 
  -1   6  -1  499.15   19.40 
   1  -6   1  514.15   19.20 
   1  -6   1  478.05   18.90 
   1  -6   1  502.95   19.10 
   1  -6   1  549.74   19.40 
   1  -6   1  517.25   19.60 
   1  -6   1  542.85   19.10 
  -2   6  -1  504.95   19.80 
  -2   6  -1  517.95   19.50 
  -2   6  -1  537.75   19.60 
  -2   6  -1  541.85   20.00 
  -2   6  -1  543.15   20.10 
  -2   6  -1  532.55   20.00 
  -2   6  -1  533.15   19.80 
   2  -6   1  530.75   19.80 
   2  -6   1  517.75   19.60 
   2  -6   1  516.85   19.70 
   2  -6   1  522.95   20.10 
   2  -6   1  547.55   19.70 
   2  -6   1  531.95   19.70 
  -3   6  -1  159.98    7.60 
  -3   6  -1  183.48    7.60 
  -3   6  -1  170.28    7.80 
  -3   6  -1  185.08    7.40 
  -3   6  -1  162.08    7.60 
   3  -6   1  174.38    7.50 
   3  -6   1  177.08    7.40 
   3  -6   1  182.68    7.50 
   3  -6   1  176.58    7.30 
   3  -6   1  183.28    7.80 
   3  -6   1  171.28    7.50 
   3  -6   1  170.98    7.80 
  -4   6  -1   61.59    3.30 
  -4   6  -1   58.59    3.50 
   4  -6   1   49.90    2.90 
   4  -6   1   49.90    3.60 
   4  -6   1   56.79    3.40 
   4  -6   1   62.39    3.40 
   4  -6   1   58.99    3.60 
  -5   6  -1   20.80    1.80 
  -5   6  -1   15.90    1.70 
   5  -6   1   19.10    1.80 
   5  -6   1   18.00    1.90 
  10   5  -1   43.30    2.90 
  10   5  -1   48.60    2.70 
  10   5  -1   48.30    3.10 
  10   5  -1   43.20    3.00 
   9   5  -1   23.40    2.20 
   9   5  -1   17.70    2.40 
   9   5  -1   20.70    2.40 
   9   5  -1   12.60    1.90 
   9   5  -1   12.60    1.60 
   9   5  -1   16.10    1.80 
  -9  -5   1   17.60    1.40 
   8   5  -1  157.08    7.20 
   8   5  -1  142.89    6.30 
   8   5  -1  148.09    6.70 
   8   5  -1  154.38    7.40 
   8   5  -1  149.09    6.50 
   8   5  -1  148.89    7.20 
   8   5  -1  152.98    6.80 
  -8  -5   1  144.59    5.90 
   7   5  -1  269.47   10.60 
   7   5  -1  288.97   11.30 
   7   5  -1  275.27   11.50 
   7   5  -1  292.87   11.10 
   7   5  -1  293.77   11.80 
   7   5  -1  282.07   11.20 
   7   5  -1  287.17   11.80 
   7   5  -1  282.57   10.80 
   7   5  -1  281.67   11.20 
  -7  -5   1  275.17   12.30 
  -7  -5   1  269.77   10.40 
   6   5  -1  131.89    6.00 
   6   5  -1  126.69    5.50 
   6   5  -1  131.79    5.90 
   6   5  -1  138.59    6.40 
   6   5  -1  132.79    6.20 
   6   5  -1  126.69    6.00 
   6   5  -1  136.89    5.80 
   6   5  -1  140.69    5.60 
   6   5  -1  133.89    6.40 
  -6  -5   1  136.39    5.30 
  -6  -5   1  134.09    6.40 
   5   5  -1   37.00    2.40 
   5   5  -1   35.40    2.00 
   5   5  -1   30.80    2.00 
   5   5  -1   33.60    2.60 
   5   5  -1   36.70    2.20 
   5   5  -1   32.10    2.20 
   5   5  -1   33.70    2.60 
   5   5  -1   32.40    2.30 
   5   5  -1   34.30    2.30 
   5   5  -1   35.30    2.30 
   5   5  -1   34.10    2.60 
  -5  -5   1   34.10    1.80 
  -5  -5   1   32.60    1.80 
  -5  -5   1   33.00    2.20 
  -5  -5   1   33.00    1.70 
   4   5  -1  327.97   12.40 
   4   5  -1  337.47   12.40 
   4   5  -1  338.07   12.60 
   4   5  -1  334.47   12.40 
  -4  -5   1  327.47   12.00 
  -4  -5   1  335.27   12.10 
  -4  -5   1  307.07   13.40 
  -4  -5   1  338.97   12.60 
  -4  -5   1  340.17   12.10 
   3   5  -1  229.48    8.70 
   3   5  -1  228.78    8.90 
   3   5  -1  228.98    8.70 
   3   5  -1  228.78    8.70 
   3   5  -1  232.88    8.80 
   3   5  -1  222.88    8.70 
  -3  -5   1  223.28    8.40 
  -3  -5   1  225.48    8.40 
  -3  -5   1  229.38    8.90 
  -3  -5   1  207.08    8.50 
  -3  -5   1  234.58    8.50 
  -3  -5   1  231.68    9.90 
   2   5  -1  923.71   34.00 
   2   5  -1  950.20   33.40 
   2   5  -1  936.11   33.30 
   2   5  -1  933.01   33.20 
   2   5  -1  948.41   33.10 
   2   5  -1  934.51   33.20 
   2   5  -1  886.61   34.60 
  -2  -5   1  894.01   32.90 
  -2  -5   1  960.30   32.90 
  -2  -5   1  973.40   32.90 
  -2  -5   1  871.71   32.90 
  -2  -5   1  947.31   34.70 
  -2  -5   1  912.61   33.10 
  -2  -5   1  982.10   33.50 
   1   5  -1  479.65   17.60 
   1   5  -1  479.55   17.50 
   1   5  -1  491.95   17.40 
   1   5  -1  463.25   18.30 
   1   5  -1  487.05   17.40 
   1   5  -1  441.36   18.90 
   1   5  -1  498.75   17.40 
  -1  -5   1  491.25   17.60 
  -1  -5   1  490.85   17.40 
  -1  -5   1  470.55   17.00 
  -1  -5   1  472.85   17.10 
  -1  -5   1  465.45   18.90 
  -1  -5   1  462.05   17.20 
   0   5  -1  569.14   20.30 
   0   5  -1  569.94   20.50 
   0   5  -1  578.64   20.40 
   0   5  -1  532.95   22.20 
   0   5  -1  522.35   21.30 
   0   5  -1  524.95   20.00 
   0   5  -1  578.54   20.60 
   0   5  -1  575.84   20.40 
   0  -5   1  548.35   19.90 
   0  -5   1  568.34   20.40 
   0  -5   1  592.34   20.20 
   0  -5   1  569.84   20.40 
   0  -5   1  556.64   19.90 
   0  -5   1  535.55   22.00 
  -1   5  -1    3.50    1.60 
  -1   5  -1    4.40    1.20 
  -1   5  -1    3.50    1.30 
  -1   5  -1    4.10    1.20 
  -1   5  -1    3.90    1.20 
  -1   5  -1    3.40    0.90 
  -1   5  -1    2.60    0.80 
  -1   5  -1    3.00    1.10 
  -1   5  -1    3.30    0.90 
   1  -5   1    4.40    0.70 
   1  -5   1    3.90    1.00 
   1  -5   1    2.50    1.40 
   1  -5   1    3.30    0.70 
   1  -5   1    2.90    0.90 
   1  -5   1    3.50    0.90 
   1  -5   1    6.20    1.10 
   1  -5   1    4.50    0.90 
   1  -5   1    2.00    1.20 
  -2   5  -1 1285.87   44.30 
  -2   5  -1 1299.17   44.40 
  -2   5  -1 1186.78   43.80 
  -2   5  -1 1199.58   43.80 
  -2   5  -1 1276.07   44.20 
  -2   5  -1 1301.87   44.30 
  -2   5  -1 1209.08   43.40 
  -2   5  -1 1170.78   44.10 
  -2   5  -1 1201.28   43.70 
   2  -5   1 1205.28   43.90 
   2  -5   1 1295.77   43.90 
   2  -5   1 1242.48   44.10 
   2  -5   1 1191.98   44.00 
   2  -5   1 1191.18   43.90 
   2  -5   1 1238.08   44.30 
  -3   5  -1  140.39    5.70 
  -3   5  -1  147.99    5.90 
  -3   5  -1  143.59    6.70 
  -3   5  -1  151.08    6.80 
  -3   5  -1  135.59    6.50 
  -3   5  -1  140.29    6.10 
  -3   5  -1  139.49    6.50 
  -3   5  -1  141.99    6.10 
   3  -5   1  143.89    6.30 
   3  -5   1  142.49    6.20 
   3  -5   1  147.09    6.60 
   3  -5   1  141.69    6.20 
   3  -5   1  148.99    6.80 
   3  -5   1  141.69    6.60 
   3  -5   1  144.19    6.30 
   3  -5   1  137.79    6.30 
  -4   5  -1   93.49    4.00 
  -4   5  -1   94.49    5.10 
  -4   5  -1   87.39    4.80 
  -4   5  -1   95.99    5.10 
  -4   5  -1   95.19    4.70 
  -4   5  -1   96.29    4.50 
  -4   5  -1   90.79    4.40 
  -4   5  -1   70.19    4.40 
   4  -5   1   84.09    4.40 
   4  -5   1   88.49    4.40 
   4  -5   1   93.69    4.60 
   4  -5   1   87.79    4.60 
   4  -5   1   87.89    5.00 
   4  -5   1   99.59    4.50 
  -5   5  -1   54.69    2.70 
  -5   5  -1   56.99    3.20 
  -5   5  -1   59.09    3.60 
   5  -5   1   55.19    3.70 
   5  -5   1   55.69    3.30 
   5  -5   1   54.29    3.10 
   5  -5   1   57.89    3.70 
   5  -5   1   55.79    3.10 
  -6   5  -1    2.80    0.60 
  -6   5  -1    3.00    1.00 
  -6   5  -1    3.90    1.20 
   6  -5   1    2.20    1.10 
   6  -5   1    3.00    1.10 
  10   4  -1  157.38    6.80 
  10   4  -1  168.08    6.80 
  10   4  -1  173.78    7.20 
  10   4  -1  183.88    7.50 
  10   4  -1  181.68    7.40 
   9   4  -1  312.07   12.50 
   9   4  -1  299.37   11.90 
   9   4  -1  317.17   12.20 
   9   4  -1  330.17   12.80 
   9   4  -1  320.87   12.80 
  -9  -4   1  293.97   11.40 
   8   4  -1  505.45   18.90 
   8   4  -1  515.75   19.80 
   8   4  -1  476.75   18.90 
   8   4  -1  543.85   19.60 
   8   4  -1  490.75   18.80 
   8   4  -1  529.85   19.80 
   8   4  -1  527.85   19.20 
  -8  -4   1  477.85   18.30 
   7   4  -1  180.68    7.70 
   7   4  -1  179.28    7.30 
   7   4  -1  184.38    7.60 
   7   4  -1  186.48    7.80 
   7   4  -1  191.08    8.40 
   7   4  -1  182.08    7.50 
   7   4  -1  190.68    8.20 
   7   4  -1  184.98    8.30 
  -7  -4   1  174.28    8.60 
   6   4  -1 1062.39   38.30 
   6   4  -1 1119.49   38.20 
   6   4  -1 1100.49   38.70 
   6   4  -1 1009.10   38.30 
   6   4  -1 1086.49   38.90 
   6   4  -1 1019.30   37.80 
   6   4  -1 1060.29   38.00 
   6   4  -1 1044.70   38.10 
   6   4  -1 1085.09   38.80 
   6   4  -1 1078.09   38.30 
  -6  -4   1 1107.49   39.00 
   5   4  -1  347.47   12.60 
  -5  -4   1  329.97   12.20 
  -5  -4   1  342.47   13.20 
  -5  -4   1  337.07   12.70 
   4   4  -1  350.56   12.80 
   4   4  -1  341.17   12.80 
  -4  -4   1  351.26   13.00 
  -4  -4   1  352.36   12.50 
  -4  -4   1  347.77   12.50 
  -4  -4   1  339.57   13.50 
   3   4  -1  360.16   13.60 
   3   4  -1  379.66   13.60 
   3   4  -1  374.26   13.70 
   3   4  -1  382.86   13.60 
   3   4  -1  369.36   13.70 
  -3  -4   1  374.56   14.50 
  -3  -4   1  379.46   13.30 
  -3  -4   1  380.66   13.80 
  -3  -4   1  346.57   13.40 
  -3  -4   1  381.86   13.40 
   2   4  -1 1219.98   41.20 
   2   4  -1 1145.49   41.30 
   2   4  -1 1201.58   41.20 
   2   4  -1 1148.79   41.30 
   2   4  -1 1140.89   42.30 
   2   4  -1 1152.18   41.20 
  -2  -4   1 1215.48   41.00 
  -2  -4   1 1090.99   41.00 
  -2  -4   1 1122.69   41.20 
  -2  -4   1 1247.98   42.40 
  -2  -4   1 1181.78   41.20 
  -2  -4   1 1186.68   41.40 
  -2  -4   1 1156.08   41.00 
   1   4  -1  461.25   18.30 
   1   4  -1  509.75   18.70 
   1   4  -1  515.75   18.60 
   1   4  -1  537.45   18.60 
   1   4  -1  504.95   18.70 
   1   4  -1  526.15   19.30 
   1   4  -1  534.55   19.90 
   1   4  -1  530.65   18.60 
  -1  -4   1  537.65   19.80 
  -1  -4   1  524.65   18.60 
  -1  -4   1  529.55   18.30 
  -1  -4   1  494.15   18.40 
  -1  -4   1  508.45   18.70 
  -1  -4   1  531.65   18.70 
  -1  -4   1  506.85   18.30 
   0   4  -1  107.89    4.70 
   0   4  -1  108.99    5.80 
   0   4  -1  121.09    4.80 
   0   4  -1  117.99    4.70 
   0   4  -1  102.99    4.30 
   0   4  -1  118.59    4.70 
   0   4  -1  112.49    4.70 
   0   4  -1  106.99    4.40 
   0   4  -1  115.29    5.40 
   0  -4   1  115.69    4.50 
   0  -4   1  109.69    4.60 
   0  -4   1  115.89    4.30 
   0  -4   1  102.39    4.40 
   0  -4   1  113.19    4.70 
   0  -4   1  118.59    5.70 
   0  -4   1  108.19    4.30 
  -1   4  -1    0.10    1.00 
  -1   4  -1    0.10    0.80 
  -1   4  -1    0.90    0.80 
  -1   4  -1    0.60    0.60 
  -1   4  -1   -0.50    0.80 
  -1   4  -1    0.10    1.00 
  -1   4  -1    0.30    0.70 
  -1   4  -1    0.50    0.80 
   1  -4   1    0.30    0.40 
   1  -4   1   -0.20    0.40 
   1  -4   1    0.40    0.60 
   1  -4   1    0.10    0.60 
   1  -4   1   -0.10    0.90 
   1  -4   1   -0.20    0.50 
   1  -4   1    0.40    0.60 
  -2   4  -1  304.87   11.30 
  -2   4  -1  297.27   11.30 
  -2   4  -1  296.47   11.20 
  -2   4  -1  271.67   12.20 
  -2   4  -1  296.47   11.20 
  -2   4  -1  291.57   11.20 
  -2   4  -1  286.47   12.90 
  -2   4  -1  283.07   10.70 
   2  -4   1  300.27   11.10 
   2  -4   1  285.87   11.10 
   2  -4   1  289.97   11.00 
  -3   4  -1  229.08    9.40 
  -3   4  -1  227.08    9.00 
  -3   4  -1  240.18    8.90 
  -3   4  -1  233.08    8.70 
  -3   4  -1  235.98    9.50 
  -3   4  -1  244.78    9.60 
  -3   4  -1  240.88    9.60 
  -3   4  -1  239.28    9.40 
   3  -4   1  231.18    9.30 
   3  -4   1  238.68    9.10 
   3  -4   1  228.58    9.20 
   3  -4   1  229.38    9.50 
   3  -4   1  224.98    9.60 
   3  -4   1  225.18    9.10 
   3  -4   1  227.68    9.40 
   3  -4   1  228.98    9.20 
  -4   4  -1  441.96   16.90 
  -4   4  -1  470.25   16.60 
  -4   4  -1  466.15   17.50 
  -4   4  -1  454.35   17.40 
  -4   4  -1  452.15   16.70 
  -4   4  -1  459.65   17.50 
  -4   4  -1  470.25   17.60 
   4  -4   1  439.46   17.10 
   4  -4   1  461.55   17.10 
   4  -4   1  450.15   17.20 
   4  -4   1  475.35   17.70 
   4  -4   1  464.55   17.10 
   4  -4   1  446.46   17.70 
   4  -4   1  449.06   17.30 
  -5   4  -1  209.88    9.00 
  -5   4  -1  207.08    8.20 
  -5   4  -1  207.68    8.40 
  -5   4  -1  212.88    8.00 
  -5   4  -1  199.58    8.90 
  -5   4  -1  205.58    9.00 
   5  -4   1  214.88    8.60 
   5  -4   1  200.58    8.40 
   5  -4   1  196.28    9.00 
   5  -4   1  216.08    9.10 
   5  -4   1  205.88    8.40 
   5  -4   1  210.58    9.10 
  -6   4  -1  168.58    6.50 
  -6   4  -1  169.28    7.20 
  -6   4  -1  155.38    6.60 
  -6   4  -1  160.48    6.70 
   6  -4   1  174.18    7.10 
   6  -4   1  160.18    6.80 
   6  -4   1  175.18    7.50 
   6  -4   1  159.48    7.50 
  -7   4  -1   51.69    2.90 
  -7   4  -1   55.29    2.80 
  -7   4  -1   51.49    2.30 
   7  -4   1   40.00    3.20 
   7  -4   1   53.19    3.00 
  10   3  -1    6.90    1.20 
  10   3  -1   10.40    1.60 
  10   3  -1    8.60    1.20 
  10   3  -1    6.90    1.30 
   9   3  -1   28.60    2.80 
   9   3  -1   20.90    2.00 
   9   3  -1   26.00    2.20 
   9   3  -1   30.40    3.00 
   9   3  -1   23.40    2.60 
  -9  -3   1   23.90    1.50 
   8   3  -1    1.20    1.50 
   8   3  -1   -0.40    1.60 
   8   3  -1    3.10    1.30 
   8   3  -1    2.60    1.10 
   8   3  -1    1.50    1.40 
   8   3  -1    1.30    1.30 
   8   3  -1    0.00    1.40 
  -8  -3   1    1.60    1.20 
   7   3  -1   62.09    3.10 
   7   3  -1   65.49    4.10 
   7   3  -1   67.89    3.50 
   7   3  -1   66.79    3.60 
   7   3  -1   67.59    4.20 
   7   3  -1   60.49    3.50 
   7   3  -1   57.59    3.30 
   7   3  -1   72.59    4.00 
  -7  -3   1   62.19    4.20 
   6   3  -1   81.79    3.60 
   6   3  -1   72.29    4.10 
   6   3  -1   67.99    3.60 
   6   3  -1   74.69    3.70 
   6   3  -1   73.39    4.00 
   6   3  -1   69.69    3.60 
   6   3  -1   76.49    4.10 
   6   3  -1   72.99    3.60 
   6   3  -1   66.39    3.20 
  -6  -3   1   69.99    3.90 
  -6  -3   1   73.29    4.30 
   5   3  -1  193.98    7.40 
  -5  -3   1  188.08    7.90 
   4   3  -1   11.60    1.10 
  -4  -3   1   11.40    1.20 
  -4  -3   1   11.50    1.10 
  -4  -3   1   11.10    0.90 
  -4  -3   1   12.20    0.80 
   3   3  -1  305.27   11.10 
   3   3  -1  290.77   11.00 
   3   3  -1  296.17   11.00 
   3   3  -1  296.77   11.00 
  -3  -3   1  312.07   11.50 
  -3  -3   1  293.97   10.80 
  -3  -3   1  302.27   10.80 
  -3  -3   1  310.07   11.10 
  -3  -3   1  307.07   10.80 
   2   3  -1 2385.96   85.89 
   2   3  -1 2428.96   85.79 
   2   3  -1 2400.36   86.49 
   2   3  -1 2538.45   85.99 
   2   3  -1 2359.96   85.89 
   2   3  -1 2494.15   85.79 
  -2  -3   1 2582.04   87.59 
  -2  -3   1 2373.86   86.29 
  -2  -3   1 2571.24   85.69 
  -2  -3   1 2507.35   85.99 
  -2  -3   1 2427.66   85.69 
   1   3  -1 3382.46  117.69 
   1   3  -1 3332.37  115.89 
   1   3  -1 3226.88  115.69 
   1   3  -1 3447.76  115.89 
   1   3  -1 3514.25  118.69 
   1   3  -1 3189.98  115.59 
  -1  -3   1 3250.47  116.49 
  -1  -3   1 3221.28  116.19 
  -1  -3   1 3375.26  115.99 
  -1  -3   1 3380.76  117.59 
  -1  -3   1 3157.18  115.39 
  -1  -3   1 3380.36  117.39 
  -1  -3   1 3270.97  115.59 
   0   3  -1 3215.58  115.99 
   0   3  -1 3128.89  115.89 
   0   3  -1 3353.66  116.29 
   0   3  -1 3225.88  115.89 
   0   3  -1 3216.38  115.79 
   0   3  -1 3440.96  116.99 
   0   3  -1 3488.05  116.49 
   0   3  -1 3148.28  116.39 
   0  -3   1 3523.95  117.69 
   0  -3   1 3294.57  115.79 
   0  -3   1 3176.88  116.89 
   0  -3   1 3546.75  119.19 
   0  -3   1 3508.75  116.09 
   0  -3   1 3336.67  116.39 
   0  -3   1 3355.86  115.89 
   0  -3   1 3237.98  115.59 
  -1   3  -1  916.51   31.00 
  -1   3  -1  793.82   31.00 
  -1   3  -1  869.41   31.00 
  -1   3  -1  880.21   31.10 
  -1   3  -1  865.61   31.10 
  -1   3  -1  936.11   32.40 
  -1   3  -1  884.31   31.70 
  -1   3  -1  921.51   31.00 
   1  -3   1  872.91   31.00 
   1  -3   1  829.22   30.60 
   1  -3   1  896.91   30.60 
   1  -3   1  844.02   30.90 
   1  -3   1  837.32   30.80 
   1  -3   1  880.21   32.00 
   1  -3   1  886.11   31.20 
   1  -3   1  877.81   30.90 
  -2   3  -1  400.06   14.40 
  -2   3  -1  391.16   15.20 
  -2   3  -1  385.26   14.30 
  -2   3  -1  385.16   15.60 
  -2   3  -1  379.66   14.40 
  -2   3  -1  379.96   13.90 
  -2   3  -1  401.06   14.30 
  -2   3  -1  377.16   14.20 
  -2   3  -1  393.96   14.30 
   2  -3   1  382.26   14.10 
   2  -3   1  383.96   13.70 
   2  -3   1  380.06   14.20 
   2  -3   1  373.96   15.30 
   2  -3   1  396.46   14.20 
   2  -3   1  408.46   14.20 
  -3   3  -1   56.59    2.50 
  -3   3  -1   56.09    3.00 
  -3   3  -1   55.29    2.90 
  -3   3  -1   53.19    2.90 
  -3   3  -1   50.89    3.90 
  -3   3  -1   50.69    2.80 
  -3   3  -1   53.29    3.00 
  -3   3  -1   55.39    3.70 
   3  -3   1   52.69    2.70 
   3  -3   1   54.09    2.80 
   3  -3   1   50.69    2.80 
  -4   3  -1  218.48    9.10 
  -4   3  -1  226.88    9.10 
  -4   3  -1  217.98    8.70 
  -4   3  -1  212.18    8.40 
  -4   3  -1  232.58    8.50 
  -4   3  -1  238.38    9.30 
  -4   3  -1  232.08    9.20 
  -4   3  -1  233.98    9.20 
   4  -3   1  231.78    9.10 
   4  -3   1  217.78    9.40 
   4  -3   1  220.78    8.90 
   4  -3   1  215.88    8.90 
   4  -3   1  233.28    8.80 
   4  -3   1  216.88    9.00 
   4  -3   1  207.28    9.20 
   4  -3   1  237.18    9.40 
   4  -3   1  226.68    8.90 
  -5   3  -1   21.40    1.80 
  -5   3  -1   19.20    2.30 
  -5   3  -1   16.30    2.00 
  -5   3  -1   16.60    1.50 
  -5   3  -1   16.50    1.70 
  -5   3  -1   17.20    2.10 
  -5   3  -1   18.60    2.10 
   5  -3   1   14.10    1.60 
   5  -3   1   14.20    2.20 
   5  -3   1   13.10    1.60 
   5  -3   1   15.90    2.20 
   5  -3   1   18.40    2.00 
   5  -3   1   18.10    2.20 
   5  -3   1   17.80    1.80 
   5  -3   1   20.30    2.50 
  -6   3  -1    0.50    0.90 
  -6   3  -1    0.80    1.30 
  -6   3  -1   -0.20    0.90 
  -6   3  -1    1.40    0.90 
  -6   3  -1    1.60    1.30 
  -6   3  -1   -0.60    1.20 
  -6   3  -1    0.90    1.30 
   6  -3   1    1.40    1.00 
   6  -3   1   -0.10    1.20 
   6  -3   1    0.50    1.50 
   6  -3   1    1.90    1.70 
   6  -3   1    5.70    1.80 
   6  -3   1   -0.60    1.30 
   6  -3   1    1.50    1.10 
  -7   3  -1   79.29    3.40 
  -7   3  -1   75.39    4.00 
  -7   3  -1   75.29    3.50 
   7  -3   1   81.19    3.90 
   7  -3   1   72.59    3.60 
   7  -3   1   67.89    4.20 
   7  -3   1   70.89    4.20 
   7  -3   1   81.89    4.40 
  -8   3  -1  103.59    4.00 
   8  -3   1  100.99    4.60 
  10   2  -1   81.09    3.90 
  10   2  -1   78.69    4.00 
  10   2  -1   77.79    3.60 
   9   2  -1   77.99    4.10 
   9   2  -1   88.19    4.60 
   9   2  -1   79.59    4.70 
   9   2  -1   85.89    4.60 
   9   2  -1   73.99    4.40 
  -9  -2   1   74.69    3.30 
   8   2  -1  196.18    8.50 
   8   2  -1  190.28    8.80 
   8   2  -1  189.78    7.90 
   8   2  -1  191.28    8.00 
   8   2  -1  183.18    7.80 
   8   2  -1  196.88    8.70 
   8   2  -1  182.98    8.40 
   7   2  -1  218.48    9.30 
   7   2  -1  225.28    8.70 
   7   2  -1  215.88    9.10 
   7   2  -1  222.18    8.80 
   7   2  -1  200.48    8.50 
   7   2  -1  215.08    9.40 
   7   2  -1  215.28    9.20 
  -7  -2   1  213.38    8.60 
  -7  -2   1  189.78    9.50 
   6   2  -1 1128.79   42.30 
   6   2  -1 1193.78   42.50 
   6   2  -1 1134.69   41.90 
   6   2  -1 1140.19   41.90 
   6   2  -1 1163.08   41.90 
   6   2  -1 1290.77   42.00 
   6   2  -1 1207.78   42.60 
   6   2  -1 1157.38   42.30 
  -6  -2   1 1194.88   42.80 
  -6  -2   1 1166.68   42.30 
   5   2  -1  662.43   23.10 
  -5  -2   1  620.24   23.40 
   4   2  -1 2782.02   96.49 
  -4  -2   1 2632.54   96.39 
  -4  -2   1 2794.62   97.79 
  -4  -2   1 2888.21   96.89 
  -4  -2   1 2719.23   96.09 
   3   2  -1 1091.79   40.20 
   3   2  -1 1143.79   40.40 
   3   2  -1 1167.28   40.30 
  -3  -2   1 1127.29   40.30 
  -3  -2   1 1138.29   40.40 
  -3  -2   1 1220.68   40.50 
  -3  -2   1 1165.18   40.10 
  -3  -2   1 1144.49   40.60 
   2   2  -1  241.78    8.70 
   2   2  -1  243.78    9.00 
  -2  -2   1  253.97    8.60 
  -2  -2   1  228.18    9.10 
  -2  -2   1  250.47    8.90 
  -2  -2   1  248.88    9.10 
  -2  -2   1  244.18    8.70 
  -2  -2   1  224.98    8.50 
   1   2  -1 2137.79   74.29 
   1   2  -1 2247.18   75.79 
   1   2  -1 2143.19   75.99 
   1   2  -1 2058.19   74.09 
   1   2  -1 2184.88   74.59 
  -1  -2   1 2065.89   74.49 
  -1  -2   1 2143.89   76.39 
  -1  -2   1 2075.99   74.19 
  -1  -2   1 2005.20   74.19 
  -1  -2   1 2220.38   75.29 
   0   2  -1   58.79    2.80 
   0   2  -1   63.09    2.70 
   0   2  -1   61.29    2.40 
   0   2  -1   64.19    3.00 
   0   2  -1   65.29    3.40 
   0   2  -1   57.39    2.60 
   0  -2   1   60.39    2.60 
   0  -2   1   58.39    2.40 
   0  -2   1   59.19    2.70 
   0  -2   1   62.79    2.80 
   0  -2   1   56.49    2.70 
   0  -2   1   60.39    3.20 
   0  -2   1   59.49    2.50 
  -1   2  -1 7153.68  242.28 
  -1   2  -1 6515.75  241.68 
  -1   2  -1 6929.01  242.18 
  -1   2  -1 6740.23  240.28 
  -1   2  -1 7179.68  244.78 
  -1   2  -1 6892.71  241.88 
  -1   2  -1 6603.14  241.78 
  -1   2  -1 7023.00  246.18 
  -1   2  -1 6720.53  242.68 
   1  -2   1 7303.37  243.68 
   1  -2   1 6754.62  241.98 
   1  -2   1 6896.11  243.28 
   1  -2   1 7108.29  240.88 
   1  -2   1 6530.65  241.48 
   1  -2   1 7300.17  246.78 
  -2   2  -1  684.53   26.70 
  -2   2  -1  769.72   26.70 
  -2   2  -1  757.02   26.80 
  -2   2  -1  781.12   27.80 
  -2   2  -1  749.23   26.80 
  -2   2  -1  720.13   26.60 
  -2   2  -1  758.22   27.40 
  -2   2  -1  767.42   26.70 
   2  -2   1  761.72   26.50 
   2  -2   1  776.32   27.00 
   2  -2   1  741.13   26.70 
   2  -2   1  735.03   26.50 
   2  -2   1  782.42   26.60 
   2  -2   1  743.03   27.50 
   2  -2   1  778.62   26.30 
   2  -2   1  733.03   26.60 
   2  -2   1  739.83   26.60 
  -3   2  -1  220.78    9.10 
  -3   2  -1  205.18    8.10 
  -3   2  -1  214.78    9.20 
  -3   2  -1  214.98    8.10 
  -3   2  -1  199.48    7.90 
  -3   2  -1  192.88    8.00 
  -3   2  -1  212.58    8.10 
  -3   2  -1  193.38    8.00 
  -3   2  -1  211.38    7.60 
   3  -2   1  202.18    7.90 
   3  -2   1  211.08    8.00 
   3  -2   1  208.58    7.80 
   3  -2   1  214.28    7.90 
  -4   2  -1   33.80    3.10 
  -4   2  -1   38.70    2.50 
  -4   2  -1   40.70    2.00 
  -4   2  -1   39.00    2.50 
  -4   2  -1   34.60    3.00 
  -4   2  -1   39.00    2.40 
  -4   2  -1   39.60    2.40 
   4  -2   1   38.60    2.20 
   4  -2   1   35.50    2.10 
   4  -2   1   43.60    2.40 
   4  -2   1   45.60    2.50 
  -5   2  -1  112.59    5.20 
  -5   2  -1  112.29    4.40 
  -5   2  -1  109.79    5.20 
  -5   2  -1  101.49    4.50 
  -5   2  -1  102.19    4.30 
  -5   2  -1  101.99    5.00 
  -5   2  -1  111.59    5.10 
   5  -2   1   98.29    4.60 
   5  -2   1   98.09    4.90 
   5  -2   1  107.79    5.30 
   5  -2   1  102.49    4.80 
   5  -2   1  110.89    4.90 
   5  -2   1  105.79    4.60 
   5  -2   1   99.79    4.70 
   5  -2   1  109.19    4.80 
   5  -2   1  105.59    5.20 
   5  -2   1  104.69    5.30 
   5  -2   1  103.19    5.30 
  -6   2  -1   43.60    3.20 
  -6   2  -1   40.70    3.20 
  -6   2  -1   39.60    2.40 
  -6   2  -1   41.60    3.10 
  -6   2  -1   38.20    2.20 
   6  -2   1   40.40    2.80 
   6  -2   1   36.80    2.70 
   6  -2   1   35.90    3.30 
   6  -2   1   41.90    3.40 
   6  -2   1   36.40    3.00 
   6  -2   1   45.80    3.60 
   6  -2   1   41.10    3.10 
   6  -2   1   42.50    2.80 
   6  -2   1   38.10    2.80 
  -7   2  -1   88.59    4.80 
  -7   2  -1   91.49    4.10 
  -7   2  -1   91.59    4.90 
  -7   2  -1   89.89    4.90 
  -7   2  -1   89.49    4.00 
  -7   2  -1   85.19    4.50 
   7  -2   1   93.69    4.70 
   7  -2   1   90.49    5.10 
   7  -2   1   91.99    5.10 
   7  -2   1   88.19    4.50 
   7  -2   1   94.29    5.10 
   7  -2   1   97.69    4.50 
   7  -2   1   93.99    5.20 
  -8   2  -1    1.70    0.70 
  -8   2  -1    1.60    0.80 
   8  -2   1    1.40    1.00 
   8  -2   1    0.90    0.80 
   8  -2   1    2.50    1.30 
   8  -2   1    1.70    1.20 
   8  -2   1    0.90    1.30 
   9   1  -1   14.10    1.60 
   9   1  -1   18.60    2.20 
   9   1  -1   13.30    2.00 
   9   1  -1   18.50    2.20 
   9   1  -1   17.10    2.00 
  -9  -1   1   15.10    1.20 
   8   1  -1   90.39    5.00 
   8   1  -1   98.49    5.40 
   8   1  -1   77.59    4.70 
   8   1  -1   98.89    5.20 
   8   1  -1   90.79    4.50 
   8   1  -1  100.09    4.70 
   8   1  -1   94.89    5.30 
  -8  -1   1   90.29    4.80 
  -8  -1   1   86.79    3.80 
   7   1  -1   14.50    2.20 
   7   1  -1   16.30    1.90 
   7   1  -1   12.50    2.10 
   7   1  -1   13.10    1.90 
   7   1  -1   16.50    2.20 
   7   1  -1   18.40    2.10 
   7   1  -1   12.40    2.00 
   6   1  -1  166.28    7.20 
   6   1  -1  157.18    6.90 
   6   1  -1  145.59    6.50 
   6   1  -1  151.88    6.60 
   6   1  -1  173.48    6.70 
   6   1  -1  168.38    7.20 
   6   1  -1  157.68    7.10 
   6   1  -1  165.18    6.80 
   6   1  -1  167.68    7.40 
  -6  -1   1  161.78    7.00 
  -6  -1   1  166.28    6.60 
  -6  -1   1  152.88    7.20 
   5   1  -1   46.90    2.40 
  -5  -1   1   41.00    2.70 
  -5  -1   1   39.80    2.40 
  -5  -1   1   42.30    3.30 
   4   1  -1 1821.02   64.89 
  -4  -1   1 1737.63   64.99 
  -4  -1   1 1789.32   65.09 
  -4  -1   1 2063.89   64.79 
   3   1  -1 3066.99  108.99 
  -3  -1   1 3183.48  110.09 
  -3  -1   1 3137.99  109.29 
  -2  -1   1 2530.75   88.59 
  -2  -1   1 2461.25   88.19 
  -2  -1   1 2534.65   88.49 
   1   1  -1  401.56   14.50 
   1   1  -1  372.76   14.40 
   1   1  -1  429.36   14.40 
   1   1  -1  419.46   14.50 
  -1  -1   1  419.66   14.50 
  -1  -1   1  419.26   14.40 
  -1  -1   1  384.66   14.30 
  -1  -1   1  416.06   14.60 
  -1  -1   1  399.36   14.30 
  -1  -1   1  402.36   14.50 
   0   1  -1  888.51   30.70 
   0   1  -1  823.92   30.40 
   0   1  -1  846.22   30.40 
   0   1  -1  861.31   30.40 
   0   1  -1  859.51   30.70 
   0   1  -1  891.81   30.30 
   0  -1   1  860.41   30.20 
   0  -1   1  822.12   30.20 
   0  -1   1  841.02   30.70 
   0  -1   1  867.31   30.60 
   0  -1   1  861.41   30.40 
   0  -1   1  837.32   30.30 
   0  -1   1  839.22   30.40 
  -1   1  -1 4428.66  156.78 
  -1   1  -1 4605.44  158.48 
  -1   1  -1 4410.06  156.48 
  -1   1  -1 4705.13  158.98 
  -1   1  -1 4118.39  156.98 
   1  -1   1 4553.74  157.48 
   1  -1   1 4349.67  157.28 
   1  -1   1 4533.75  158.98 
   1  -1   1 4428.66  155.58 
   1  -1   1 4546.75  156.98 
  -2   1  -1   34.60    2.20 
  -2   1  -1   32.20    1.70 
  -2   1  -1   33.10    1.60 
  -2   1  -1   32.90    2.10 
  -2   1  -1   32.10    1.70 
  -2   1  -1   33.10    1.80 
   2  -1   1   32.90    2.00 
   2  -1   1   30.90    1.20 
   2  -1   1   30.20    1.30 
   2  -1   1   31.40    1.80 
  -3   1  -1  150.78    6.00 
  -3   1  -1  165.68    6.80 
  -3   1  -1  158.98    6.00 
  -3   1  -1  154.88    5.90 
  -3   1  -1  144.69    6.00 
  -3   1  -1  142.49    5.70 
  -3   1  -1  158.18    6.80 
   3  -1   1  143.89    6.40 
   3  -1   1  142.79    5.70 
   3  -1   1  154.88    5.80 
   3  -1   1  158.98    6.30 
   3  -1   1  143.99    5.50 
   3  -1   1  152.78    5.90 
   3  -1   1  157.88    5.80 
  -4   1  -1  609.54   21.00 
  -4   1  -1  576.34   21.90 
  -4   1  -1  576.14   20.90 
  -4   1  -1  547.85   20.50 
  -4   1  -1  577.54   20.30 
  -4   1  -1  568.34   21.80 
  -4   1  -1  574.34   20.80 
  -4   1  -1  549.05   20.90 
   4  -1   1  583.64   20.80 
   4  -1   1  559.64   20.50 
   4  -1   1  593.44   20.70 
  -5   1  -1 1081.39   37.50 
  -5   1  -1 1086.49   37.50 
  -5   1  -1  995.50   38.30 
  -5   1  -1 1024.60   37.40 
  -5   1  -1 1056.59   36.60 
   5  -1   1 1050.19   37.60 
   5  -1   1  981.90   37.00 
   5  -1   1 1049.30   37.50 
   5  -1   1 1022.10   37.50 
   5  -1   1 1001.00   37.60 
   5  -1   1 1085.59   37.10 
   5  -1   1 1101.59   37.30 
   5  -1   1 1028.70   37.50 
   5  -1   1 1016.40   37.10 
   5  -1   1 1025.70   37.10 
  -6   1  -1  156.38    6.80 
  -6   1  -1  161.28    7.00 
  -6   1  -1  149.79    6.80 
  -6   1  -1  152.28    6.00 
   6  -1   1  149.09    6.90 
   6  -1   1  142.39    6.40 
   6  -1   1  146.69    7.00 
   6  -1   1  154.18    7.10 
   6  -1   1  146.99    6.40 
   6  -1   1  147.19    6.50 
   6  -1   1  153.78    6.50 
   6  -1   1  146.09    6.90 
   6  -1   1  151.18    6.90 
  -7   1  -1   31.10    2.90 
  -7   1  -1   32.40    2.10 
  -7   1  -1   32.00    2.00 
  -7   1  -1   32.20    2.90 
   7  -1   1   28.60    3.10 
   7  -1   1   32.30    2.60 
   7  -1   1   33.40    2.90 
   7  -1   1   29.20    2.50 
   7  -1   1   33.40    2.50 
   7  -1   1   30.70    2.50 
   7  -1   1   32.60    3.20 
   7  -1   1   33.50    3.20 
   7  -1   1   37.30    3.00 
  -8   1  -1   30.60    2.10 
  -8   1  -1   32.30    2.00 
   8  -1   1   32.30    3.10 
   8  -1   1   33.90    3.00 
   8  -1   1   33.90    2.60 
   8  -1   1   33.70    3.00 
   8  -1   1   34.10    2.80 
   8  -1   1   33.90    2.50 
   8  -1   1   33.30    3.20 
  -9   1  -1   92.49    4.10 
  -9   1  -1   94.89    3.70 
   9  -1   1   87.59    4.00 
   9  -1   1   99.29    4.50 
   9  -1   1   82.59    4.40 
   9  -1   1   96.09    4.60 
   9   0  -1   31.50    2.70 
   9   0  -1   32.50    2.90 
   9   0  -1   34.80    2.60 
   9   0  -1   34.20    2.40 
  -9   0   1   29.70    1.70 
   8   0  -1    9.50    2.00 
   8   0  -1   12.20    1.90 
   8   0  -1   12.10    2.30 
   8   0  -1    5.90    1.30 
   8   0  -1    8.40    1.70 
   8   0  -1    5.80    1.70 
   8   0  -1   12.80    1.80 
  -8   0   1    9.00    1.10 
   7   0  -1   12.00    1.50 
   7   0  -1    8.40    1.90 
   7   0  -1    9.70    2.00 
   7   0  -1    8.40    1.50 
   7   0  -1   11.20    1.60 
   7   0  -1   11.00    1.80 
   7   0  -1   10.30    1.80 
   7   0  -1   10.20    2.10 
  -7   0   1   11.90    2.00 
  -7   0   1    9.10    1.00 
  -7   0   1   12.30    1.80 
  -7   0   1   10.30    1.90 
   6   0  -1  132.09    6.20 
   6   0  -1  123.99    6.20 
   6   0  -1  137.49    6.00 
   6   0  -1  142.69    6.60 
   6   0  -1  145.09    6.70 
   6   0  -1  136.79    6.30 
   6   0  -1  139.49    5.80 
   6   0  -1  125.89    5.70 
   6   0  -1  135.89    5.90 
  -6   0   1  137.39    6.10 
  -6   0   1  132.49    6.10 
   5   0  -1   66.79    3.20 
   5   0  -1   61.19    3.30 
   5   0  -1   72.79    3.50 
   5   0  -1   61.09    3.60 
   5   0  -1   60.49    3.60 
   5   0  -1   64.79    3.50 
  -5   0   1   67.49    3.40 
  -5   0   1   62.49    4.30 
   4   0  -1  328.37   12.10 
  -4   0   1  340.57   13.40 
  -4   0   1  327.57   12.20 
  -4   0   1  327.87   12.40 
  -4   0   1  329.07   12.20 
   3   0  -1  425.96   15.30 
   3   0  -1  427.16   15.30 
  -3   0   1  450.25   15.80 
  -3   0   1  411.76   15.60 
  -3   0   1  438.36   16.20 
  -3   0   1  424.06   15.40 
  -3   0   1  419.56   15.40 
   2   0  -1 1058.09   35.60 
   2   0  -1  877.91   35.50 
   2   0  -1 1084.39   35.70 
  -2   0   1 1030.90   35.70 
  -2   0   1 1001.00   36.10 
  -2   0   1 1048.10   36.30 
  -2   0   1 1036.30   35.90 
   1   0  -1  864.41   29.70 
   1   0  -1  859.31   29.80 
  -1   0   1  842.02   30.10 
  -1   0   1  891.91   30.10 
  -1   0   1  798.72   29.80 
  -1   0   1  850.11   29.70 
   0   0  -1   -6.00    0.30 
   0   0  -1   -6.90    0.40 
   0   0  -1   -7.00    0.40 
   0   0  -1   -5.50    0.30 
   0   0   1   -6.10    0.40 
   0   0   1   -7.30    0.40 
   0   0   1   -6.30    0.20 
   0   0   1   -6.10    0.30 
   0   0   1   -6.40    0.30 
   0   0   1   -5.40    0.40 
  -1   0  -1  811.82   29.60 
  -1   0  -1  855.91   29.70 
  -1   0  -1  820.12   29.50 
  -1   0  -1  826.52   29.70 
   1   0   1  851.01   29.70 
   1   0   1  894.71   29.80 
   1   0   1  837.42   29.50 
   1   0   1  776.22   29.30 
  -2   0  -1  861.31   30.10 
  -2   0  -1  811.62   30.40 
  -2   0  -1  833.92   30.20 
  -2   0  -1  909.71   30.50 
   2   0   1  827.12   30.20 
   2   0   1  870.71   30.40 
   2   0   1  879.11   30.10 
  -3   0  -1  765.82   27.20 
  -3   0  -1  774.32   26.50 
  -3   0  -1  798.12   27.10 
  -3   0  -1  729.33   27.20 
  -3   0  -1  736.83   26.60 
   3   0   1  747.83   26.80 
   3   0   1  721.03   26.40 
   3   0   1  707.43   26.40 
   3   0   1  741.93   26.60 
   3   0   1  731.33   26.30 
  -4   0  -1  318.87   12.60 
  -4   0  -1  318.37   12.30 
  -4   0  -1  320.67   11.60 
  -4   0  -1  303.97   11.40 
  -4   0  -1  313.57   11.90 
   4   0   1  286.97   11.20 
   4   0   1  312.07   11.40 
   4   0   1  318.87   11.50 
  -5   0  -1  154.08    6.50 
  -5   0  -1  155.88    6.70 
  -5   0  -1  153.78    6.40 
  -5   0  -1  158.08    7.70 
  -5   0  -1  151.88    6.20 
  -5   0  -1  158.68    7.10 
  -5   0  -1  152.48    5.80 
   5   0   1  158.48    6.40 
   5   0   1  163.68    6.30 
  -6   0  -1   37.20    2.60 
  -6   0  -1   38.20    2.70 
  -6   0  -1   37.50    1.90 
   6   0   1   38.50    2.40 
   6   0   1   42.40    2.60 
   6   0   1   37.50    2.50 
   6   0   1   40.70    2.90 
   6   0   1   38.80    3.10 
   6   0   1   41.40    2.50 
   6   0   1   38.30    2.80 
   6   0   1   35.30    2.90 
   6   0   1   40.20    3.00 
  -7   0  -1  143.59    6.70 
  -7   0  -1  150.68    6.90 
  -7   0  -1  148.09    5.80 
   7   0   1  139.39    7.00 
   7   0   1  147.39    6.30 
   7   0   1  140.59    6.70 
   7   0   1  148.79    6.80 
   7   0   1  144.79    6.90 
   7   0   1  137.39    6.20 
   7   0   1  143.79    6.30 
   7   0   1  138.59    6.90 
  -8   0  -1    5.90    1.60 
  -8   0  -1    6.50    1.00 
  -8   0  -1    8.50    1.80 
  -8   0  -1    6.20    1.10 
   8   0   1    6.00    1.40 
   8   0   1    4.60    1.20 
   8   0   1    4.90    1.30 
   8   0   1    7.60    1.80 
   8   0   1    4.90    1.60 
   8   0   1    5.00    1.80 
   8   0   1    5.30    1.80 
   8   0   1    4.20    1.40 
  -9   0  -1  121.89    5.10 
  -9   0  -1  123.79    4.90 
   9   0   1  122.89    6.00 
   9   0   1  122.99    5.40 
   9   0   1  127.79    5.90 
   9   0   1  131.19    5.90 
   9   0   1  121.49    5.90 
   9  -1  -1  242.78    9.70 
   9  -1  -1  199.08    9.20 
   8  -1  -1    6.30    1.80 
   8  -1  -1    6.80    1.90 
   8  -1  -1    5.20    1.40 
   8  -1  -1    5.50    1.30 
   8  -1  -1    6.50    1.70 
  -8   1   1    5.70    0.90 
  -8   1   1    7.20    0.90 
   7  -1  -1   32.90    3.00 
   7  -1  -1   22.40    2.10 
   7  -1  -1   27.40    2.50 
   7  -1  -1   26.40    2.70 
   7  -1  -1   26.60    2.90 
   7  -1  -1   29.50    3.20 
   7  -1  -1   24.50    2.30 
  -7   1   1   26.90    2.70 
  -7   1   1   27.20    1.80 
   6  -1  -1   44.90    3.10 
   6  -1  -1   47.50    3.00 
   6  -1  -1   51.09    3.60 
   6  -1  -1   53.19    3.60 
   6  -1  -1   47.60    2.80 
   6  -1  -1   46.40    2.90 
   6  -1  -1   49.50    3.60 
   6  -1  -1   47.40    3.30 
   6  -1  -1   41.70    3.20 
   6  -1  -1   49.80    2.90 
  -6   1   1   52.09    3.20 
  -6   1   1   47.90    2.30 
  -6   1   1   41.80    3.20 
  -6   1   1   51.79    3.20 
   5  -1  -1  343.37   14.20 
   5  -1  -1  375.26   14.40 
   5  -1  -1  377.96   14.60 
   5  -1  -1  357.56   13.80 
   5  -1  -1  382.76   14.10 
   5  -1  -1  380.36   14.60 
   5  -1  -1  389.66   14.00 
   5  -1  -1  378.36   14.40 
   5  -1  -1  364.46   14.00 
   5  -1  -1  346.47   14.00 
  -5   1   1  387.76   14.30 
  -5   1   1  366.96   13.60 
  -5   1   1  384.66   14.20 
  -5   1   1  380.56   14.20 
   4  -1  -1  944.91   32.50 
  -4   1   1  898.41   33.00 
  -4   1   1  889.91   32.60 
  -4   1   1  909.61   33.90 
  -4   1   1  922.81   32.70 
   3  -1  -1  157.88    6.20 
   3  -1  -1  165.78    6.20 
   3  -1  -1  164.28    6.30 
   3  -1  -1  158.28    6.20 
  -3   1   1  160.18    6.40 
  -3   1   1  166.58    6.20 
  -3   1   1  173.18    7.30 
  -3   1   1  169.18    6.50 
  -3   1   1  168.08    6.80 
  -3   1   1  157.58    6.30 
   2  -1  -1   84.79    3.60 
   2  -1  -1   90.59    3.40 
  -2   1   1   92.09    3.80 
  -2   1   1   88.49    4.10 
  -2   1   1   74.59    3.40 
  -2   1   1   88.39    3.50 
  -2   1   1   90.99    3.80 
  -2   1   1   80.09    3.20 
  -2   1   1   81.19    3.30 
   1  -1  -1 1664.33   58.09 
   1  -1  -1 1739.13   57.89 
   1  -1  -1 1521.65   57.29 
   1  -1  -1 1693.03   57.09 
   1  -1  -1 1597.84   57.09 
  -1   1   1 1559.24   57.79 
  -1   1   1 1659.83   57.19 
  -1   1   1 1577.14   57.49 
  -1   1   1 1670.23   57.49 
  -1   1   1 1726.73   58.89 
  -1   1   1 1599.64   57.19 
   0  -1  -1 1175.58   42.90 
   0  -1  -1 1254.27   43.90 
   0  -1  -1 1208.28   42.80 
   0  -1  -1 1183.78   43.20 
   0   1   1 1253.77   43.50 
   0   1   1 1196.18   42.90 
   0   1   1 1215.38   43.80 
   0   1   1 1281.07   43.70 
  -1  -1  -1 3260.57  120.59 
  -1  -1  -1 3365.66  119.99 
  -1  -1  -1 3401.56  120.79 
  -1  -1  -1 3477.55  121.59 
  -1  -1  -1 3407.86  119.29 
   1   1   1 3318.67  119.49 
   1   1   1 3409.66  119.69 
   1   1   1 3636.94  121.49 
   1   1   1 3538.35  127.09 
  -2  -1  -1 7781.12  269.27 
  -2  -1  -1 7651.63  267.07 
  -2  -1  -1 7512.35  265.87 
  -2  -1  -1 7735.43  273.17 
  -2  -1  -1 7265.07  268.57 
   2   1   1 7779.12  266.47 
   2   1   1 7722.63  268.57 
  -3  -1  -1  309.97   10.80 
  -3  -1  -1  271.67   10.10 
  -3  -1  -1  275.87   10.20 
  -3  -1  -1  274.37   10.00 
  -3  -1  -1  291.67   10.50 
  -3  -1  -1  297.77   10.70 
  -3  -1  -1  269.87   10.70 
   3   1   1  285.87   10.40 
   3   1   1  289.07   10.60 
  -4  -1  -1 2011.50   68.99 
  -4  -1  -1 2035.90   68.79 
   4   1   1 1858.71   68.49 
   4   1   1 1907.61   68.49 
   4   1   1 1972.70   68.49 
  -5  -1  -1 2170.08   79.09 
  -5  -1  -1 2207.78   77.89 
  -5  -1  -1 2220.98   77.59 
  -5  -1  -1 2270.37   78.19 
  -5  -1  -1 2207.18   78.29 
   5   1   1 2134.29   77.59 
   5   1   1 2287.97   77.59 
  -6  -1  -1   76.69    4.20 
  -6  -1  -1   78.79    3.00 
  -6  -1  -1   74.69    3.80 
  -6  -1  -1   77.59    3.60 
   6   1   1   76.59    3.70 
   6   1   1   67.39    3.50 
   6   1   1   69.19    3.60 
   6   1   1   71.19    4.10 
   6   1   1   73.39    3.90 
   6   1   1   79.09    3.60 
   6   1   1   72.49    4.00 
   6   1   1   71.19    3.50 
   6   1   1   75.49    4.10 
   6   1   1   71.99    3.90 
  -7  -1  -1   15.00    1.30 
  -7  -1  -1   14.10    1.70 
   7   1   1   13.60    1.70 
   7   1   1   13.70    2.00 
   7   1   1   17.00    1.70 
   7   1   1   18.70    2.40 
   7   1   1   13.30    1.60 
   7   1   1   14.80    2.20 
   7   1   1   14.10    2.10 
   7   1   1   14.60    1.70 
   7   1   1   14.80    2.00 
  -8  -1  -1   33.80    3.00 
  -8  -1  -1   37.90    2.20 
   8   1   1   35.40    3.10 
   8   1   1   34.60    2.60 
   8   1   1   38.70    3.40 
   8   1   1   34.90    3.10 
   8   1   1   39.90    2.80 
   8   1   1   39.90    3.00 
   8   1   1   37.40    3.50 
   8   1   1   39.70    3.40 
  -9  -1  -1  197.28    7.70 
  -9  -1  -1  189.68    7.50 
   9   1   1  209.98    8.80 
   9   1   1  204.48    8.60 
   9   1   1  189.98    8.70 
   9   1   1  194.48    8.10 
   9   1   1  202.08    8.70 
 -10  -1  -1   39.40    1.80 
  10   1   1   34.20    2.50 
  10   1   1   37.40    2.60 
  10   1   1   37.80    2.50 
  10   1   1   38.20    2.30 
   8  -2  -1  182.78    7.30 
   8  -2  -1  182.78    7.90 
   8  -2  -1  191.38    7.80 
   8  -2  -1  174.98    7.60 
   8  -2  -1  194.38    7.90 
  -8   2   1  185.98    7.00 
   7  -2  -1  200.58    9.10 
   7  -2  -1  200.98    8.40 
   7  -2  -1  206.58    9.10 
   7  -2  -1  210.08    9.00 
   7  -2  -1  229.18    9.10 
  -7   2   1  198.18    7.90 
  -7   2   1  193.98    7.70 
  -7   2   1  203.58    8.80 
   6  -2  -1   74.19    4.60 
   6  -2  -1   70.29    4.00 
   6  -2  -1   68.49    3.90 
   6  -2  -1   73.69    4.70 
   6  -2  -1   76.89    4.50 
   6  -2  -1   75.09    4.40 
   6  -2  -1   71.69    4.10 
   6  -2  -1   76.49    3.90 
   6  -2  -1   68.49    3.70 
  -6   2   1   70.79    4.10 
  -6   2   1   73.79    3.40 
  -6   2   1   73.99    4.20 
   5  -2  -1    2.60    1.10 
   5  -2  -1    2.00    1.20 
   5  -2  -1    3.00    1.40 
   5  -2  -1    6.20    1.20 
   5  -2  -1    3.20    1.30 
   5  -2  -1    2.50    0.90 
   5  -2  -1    1.60    1.00 
   5  -2  -1    3.30    1.40 
   5  -2  -1    4.30    1.50 
   5  -2  -1    2.30    1.10 
  -5   2   1    5.30    1.20 
  -5   2   1    4.50    1.40 
  -5   2   1    3.40    0.70 
  -5   2   1    2.70    1.20 
  -5   2   1    4.70    1.30 
   4  -2  -1   68.59    3.70 
   4  -2  -1   70.79    3.30 
   4  -2  -1   70.49    3.60 
   4  -2  -1   66.69    3.30 
   4  -2  -1   69.69    3.80 
   4  -2  -1   63.29    3.40 
   4  -2  -1   64.79    3.60 
   4  -2  -1   68.39    3.80 
   4  -2  -1   67.29    3.50 
   4  -2  -1   67.59    3.20 
  -4   2   1   71.59    3.60 
  -4   2   1   71.89    3.50 
  -4   2   1   65.89    2.80 
  -4   2   1   70.69    3.60 
  -4   2   1   73.29    3.50 
  -4   2   1   65.39    4.00 
   3  -2  -1  401.16   15.00 
   3  -2  -1  400.76   14.90 
   3  -2  -1  420.26   15.00 
   3  -2  -1  401.36   14.90 
  -3   2   1  396.36   15.00 
  -3   2   1  416.56   15.10 
  -3   2   1  406.86   16.10 
  -3   2   1  430.46   15.20 
  -3   2   1  424.66   15.20 
  -3   2   1  403.36   15.90 
   2  -2  -1 1384.86   46.00 
   2  -2  -1 1280.77   46.50 
   2  -2  -1 1290.47   45.90 
   2  -2  -1 1285.77   45.90 
   2  -2  -1 1259.17   45.90 
   2  -2  -1 1244.78   45.80 
  -2   2   1 1228.38   45.60 
  -2   2   1 1265.67   46.00 
  -2   2   1 1349.36   46.80 
  -2   2   1 1311.97   46.00 
  -2   2   1 1338.67   46.00 
  -2   2   1 1401.66   46.80 
  -2   2   1 1342.17   46.00 
   1  -2  -1  195.78    7.00 
   1  -2  -1  190.38    7.70 
   1  -2  -1  196.98    7.20 
   1  -2  -1  188.38    7.20 
   1  -2  -1  199.88    7.30 
  -1   2   1  202.88    7.30 
  -1   2   1  212.08    8.00 
  -1   2   1  196.78    7.30 
  -1   2   1  201.38    7.80 
  -1   2   1  175.38    6.90 
   0  -2  -1   14.30    0.80 
   0  -2  -1   15.10    1.30 
   0  -2  -1   14.20    1.00 
   0   2   1   14.10    1.10 
   0   2   1   18.60    1.60 
   0   2   1   16.50    1.40 
   0   2   1   14.40    1.10 
  -1  -2  -1  255.97    9.40 
  -1  -2  -1  266.57    9.30 
  -1  -2  -1  267.07    9.90 
   1   2   1  261.67    9.40 
   1   2   1  260.57    9.70 
   1   2   1  276.17    9.40 
   1   2   1  262.37    9.90 
   1   2   1  247.08    9.40 
  -2  -2  -1 1885.51   65.49 
  -2  -2  -1 1889.51   65.09 
  -2  -2  -1 1853.51   66.49 
  -2  -2  -1 1788.52   64.29 
   2   2   1 1850.51   64.29 
   2   2   1 1774.82   64.49 
   2   2   1 1811.72   64.29 
   2   2   1 1902.21   65.39 
  -3  -2  -1 4736.33  172.48 
  -3  -2  -1 4934.21  170.08 
  -3  -2  -1 4742.43  170.98 
  -3  -2  -1 5307.27  174.78 
  -3  -2  -1 4956.50  172.08 
   3   2   1 4461.45  170.68 
   3   2   1 4755.22  169.68 
   3   2   1 5135.29  172.28 
  -4  -2  -1  479.05   17.30 
  -4  -2  -1  487.45   17.40 
  -4  -2  -1  445.46   16.30 
  -4  -2  -1  491.25   17.10 
   4   2   1  463.15   17.00 
   4   2   1  457.05   16.60 
   4   2   1  438.66   16.70 
   4   2   1  472.15   16.70 
  -5  -2  -1  124.49    5.30 
  -5  -2  -1  120.49    5.50 
  -5  -2  -1  123.39    5.50 
   5   2   1  121.59    4.90 
   5   2   1  116.79    4.90 
  -6  -2  -1  110.69    5.20 
  -6  -2  -1  117.19    5.60 
  -6  -2  -1  115.29    5.00 
   6   2   1  114.59    5.40 
   6   2   1  102.99    4.90 
   6   2   1  114.99    4.90 
   6   2   1  110.69    4.90 
   6   2   1  117.19    5.30 
   6   2   1  108.19    5.40 
   6   2   1  110.19    4.90 
   6   2   1  108.79    5.30 
   6   2   1  122.39    5.00 
  -7  -2  -1  520.25   20.30 
  -7  -2  -1  499.85   19.80 
  -7  -2  -1  517.85   19.40 
  -7  -2  -1  517.75   18.70 
   7   2   1  543.65   19.90 
   7   2   1  550.84   19.50 
   7   2   1  519.95   20.00 
   7   2   1  525.15   20.10 
   7   2   1  538.35   20.00 
   7   2   1  530.95   19.40 
   7   2   1  510.55   19.40 
   7   2   1  507.25   19.40 
   7   2   1  532.75   19.40 
  -8  -2  -1  187.08    8.00 
  -8  -2  -1  192.68    7.50 
   8   2   1  199.08    8.20 
   8   2   1  194.88    8.00 
   8   2   1  204.68    8.90 
   8   2   1  205.48    8.70 
   8   2   1  196.78    8.70 
   8   2   1  180.48    8.00 
   8   2   1  192.78    8.80 
   8   2   1  189.28    8.00 
  -9  -2  -1    3.40    0.90 
   9   2   1    1.70    1.60 
   9   2   1    1.50    1.30 
   9   2   1    1.00    1.00 
   9   2   1    3.30    1.40 
   9   2   1    0.60    1.50 
   9   2   1    2.60    1.50 
 -10  -2  -1    4.90    0.70 
  10   2   1    5.80    1.20 
  10   2   1    2.90    1.20 
  10   2   1    5.70    1.40 
  10   2   1    3.90    1.20 
  10   2   1    6.40    1.30 
   7  -3  -1   98.09    4.90 
   7  -3  -1   92.39    5.00 
   7  -3  -1  100.59    5.20 
   7  -3  -1   92.39    4.40 
   7  -3  -1   95.49    5.00 
  -7   3   1   94.29    4.60 
  -7   3   1   97.39    4.20 
  -7   3   1  100.19    4.10 
   6  -3  -1    4.80    1.50 
   6  -3  -1    5.30    1.90 
   6  -3  -1    7.10    2.00 
   6  -3  -1    8.10    2.00 
   6  -3  -1    5.70    1.50 
   6  -3  -1    6.30    1.50 
  -6   3   1    7.70    1.20 
  -6   3   1    7.50    1.80 
  -6   3   1    4.30    1.40 
  -6   3   1    6.70    1.00 
   5  -3  -1   43.60    3.40 
   5  -3  -1   36.60    3.00 
   5  -3  -1   34.50    2.60 
   5  -3  -1   34.80    2.50 
   5  -3  -1   34.40    2.90 
   5  -3  -1   34.70    2.90 
   5  -3  -1   35.20    3.10 
   5  -3  -1   36.80    3.00 
  -5   3   1   33.60    2.80 
  -5   3   1   31.80    2.90 
  -5   3   1   32.20    2.70 
  -5   3   1   33.30    2.00 
  -5   3   1   34.80    2.80 
  -5   3   1   37.90    2.20 
   4  -3  -1  165.28    7.40 
   4  -3  -1  167.98    7.00 
   4  -3  -1  170.88    7.30 
   4  -3  -1  167.68    7.00 
   4  -3  -1  154.98    7.40 
   4  -3  -1  169.08    7.40 
   4  -3  -1  165.38    7.20 
   4  -3  -1  171.38    7.10 
   4  -3  -1  171.58    7.30 
  -4   3   1  178.48    7.40 
  -4   3   1  178.88    6.50 
  -4   3   1  161.28    7.20 
  -4   3   1  168.48    7.10 
  -4   3   1  176.18    7.20 
  -4   3   1  160.88    6.40 
  -4   3   1  173.58    7.30 
   3  -3  -1    6.20    1.00 
   3  -3  -1    7.20    1.10 
  -3   3   1    8.40    0.90 
  -3   3   1    6.90    1.10 
  -3   3   1    7.40    1.30 
  -3   3   1    6.10    1.50 
  -3   3   1    7.50    1.70 
  -3   3   1    7.40    1.20 
  -3   3   1    7.20    1.30 
  -3   3   1    6.20    1.20 
   2  -3  -1  495.15   18.40 
   2  -3  -1  501.35   18.40 
   2  -3  -1  509.95   18.40 
   2  -3  -1  511.45   18.00 
   2  -3  -1  511.45   18.50 
  -2   3   1  510.05   18.60 
  -2   3   1  519.95   18.60 
  -2   3   1  508.85   18.10 
  -2   3   1  517.05   18.60 
  -2   3   1  527.15   18.70 
  -2   3   1  509.15   19.60 
  -2   3   1  489.45   18.50 
  -2   3   1  533.35   19.80 
   1  -3  -1  342.77   12.80 
   1  -3  -1  341.17   12.70 
   1  -3  -1  338.27   13.60 
   1  -3  -1  346.47   12.80 
   1  -3  -1  354.46   12.50 
   1  -3  -1  336.77   12.50 
  -1   3   1  366.06   12.90 
  -1   3   1  360.86   13.70 
  -1   3   1  373.96   12.90 
  -1   3   1  346.37   12.80 
  -1   3   1  355.96   13.90 
  -1   3   1  352.66   12.90 
  -1   3   1  354.96   12.90 
   0  -3  -1  859.81   31.80 
   0  -3  -1  914.51   31.90 
   0  -3  -1  946.21   32.80 
   0  -3  -1  906.01   32.10 
   0  -3  -1  957.50   31.80 
   0  -3  -1  877.11   32.00 
   0   3   1  873.21   32.00 
   0   3   1  915.91   32.10 
   0   3   1  866.81   32.10 
   0   3   1  872.61   31.90 
   0   3   1  969.60   33.00 
   0   3   1  906.21   32.10 
   0   3   1  944.21   32.70 
   0   3   1  897.31   32.00 
  -1  -3  -1 1142.09   40.00 
  -1  -3  -1 1178.58   40.90 
  -1  -3  -1 1097.29   40.20 
   1   3   1 1093.79   40.20 
   1   3   1 1162.28   41.00 
   1   3   1 1128.29   40.20 
   1   3   1 1213.48   40.80 
  -2  -3  -1  133.89    5.70 
  -2  -3  -1  132.59    4.80 
  -2  -3  -1  130.59    5.10 
   2   3   1  138.19    5.60 
   2   3   1  134.19    5.10 
   2   3   1  126.39    5.20 
   2   3   1  129.79    5.10 
   2   3   1  133.29    5.00 
   2   3   1  126.89    4.80 
   2   3   1  130.29    5.70 
  -3  -3  -1  125.19    4.90 
  -3  -3  -1  141.79    5.70 
  -3  -3  -1  131.79    4.70 
   3   3   1  129.19    5.50 
   3   3   1  125.29    5.00 
   3   3   1  120.39    4.90 
   3   3   1  122.29    4.80 
   3   3   1  127.09    5.00 
   3   3   1  128.19    4.90 
  -4  -3  -1  239.38    9.10 
  -4  -3  -1  256.77    9.10 
  -4  -3  -1  269.37    9.80 
  -4  -3  -1  264.57   10.20 
  -4  -3  -1  242.68    9.30 
   4   3   1  258.27    9.50 
   4   3   1  253.27    9.60 
   4   3   1  255.27    9.40 
   4   3   1  255.07    9.30 
  -5  -3  -1 1075.79   39.50 
  -5  -3  -1 1163.68   39.20 
   5   3   1 1110.29   38.60 
   5   3   1 1130.49   38.80 
   5   3   1  992.40   38.60 
   5   3   1 1100.39   39.00 
  -6  -3  -1  234.48    9.50 
  -6  -3  -1  243.08    9.90 
  -6  -3  -1  217.48    8.60 
   6   3   1  237.38    9.60 
   6   3   1  226.78    9.10 
   6   3   1  235.98    9.40 
   6   3   1  232.38    9.00 
   6   3   1  247.28    9.10 
   6   3   1  227.98    9.10 
   6   3   1  229.38    9.50 
  -7  -3  -1  572.64   23.70 
  -7  -3  -1  640.24   22.70 
  -7  -3  -1  660.83   23.50 
  -7  -3  -1  644.74   24.40 
   7   3   1  590.14   22.90 
   7   3   1  635.34   23.70 
   7   3   1  641.74   24.00 
   7   3   1  662.43   23.40 
   7   3   1  667.13   23.40 
   7   3   1  639.24   23.50 
   7   3   1  641.04   23.40 
   7   3   1  649.43   23.80 
   7   3   1  653.83   24.00 
  -8  -3  -1  189.48    9.10 
  -8  -3  -1  192.88    7.50 
  -8  -3  -1  194.98    8.20 
   8   3   1  199.58    8.30 
   8   3   1  198.88    8.20 
   8   3   1  193.18    8.60 
   8   3   1  199.98    8.90 
   8   3   1  192.88    8.10 
   8   3   1  196.78    8.60 
   8   3   1  193.08    8.30 
   8   3   1  205.38    9.00 
  -9  -3  -1   37.50    2.10 
  -9  -3  -1   38.10    4.00 
   9   3   1   40.60    3.30 
   9   3   1   33.30    2.50 
   9   3   1   34.10    3.10 
   9   3   1   38.40    3.50 
   9   3   1   38.60    3.30 
   9   3   1   37.10    2.70 
   9   3   1   39.70    3.00 
 -10  -3  -1   70.89    3.20 
 -10  -3  -1   67.89    3.10 
  10   3   1   77.49    3.80 
  10   3   1   77.29    4.20 
  10   3   1   72.39    4.00 
  10   3   1   70.09    4.10 
   7  -4  -1   48.80    3.00 
   7  -4  -1   47.50    2.80 
  -7   4   1   53.39    2.30 
  -7   4   1   48.80    2.70 
   6  -4  -1   14.10    1.60 
   6  -4  -1   18.80    2.30 
   6  -4  -1   21.80    2.10 
   6  -4  -1   19.00    2.20 
   6  -4  -1   17.40    2.20 
   6  -4  -1   18.50    2.30 
  -6   4   1   18.10    1.50 
  -6   4   1   16.80    1.60 
   5  -4  -1   31.40    3.30 
   5  -4  -1   32.30    2.90 
   5  -4  -1   29.30    2.60 
   5  -4  -1   30.00    3.00 
   5  -4  -1   34.60    3.30 
   5  -4  -1   33.50    2.60 
  -5   4   1   27.60    2.70 
  -5   4   1   34.10    2.60 
  -5   4   1   32.70    2.90 
  -5   4   1   32.80    2.10 
  -5   4   1   32.90    2.30 
  -5   4   1   32.00    2.20 
   4  -4  -1   48.60    3.00 
   4  -4  -1   48.80    3.20 
   4  -4  -1   51.89    3.20 
   4  -4  -1   45.80    3.00 
   4  -4  -1   51.69    3.40 
   4  -4  -1   45.40    3.20 
   4  -4  -1   49.00    3.40 
   4  -4  -1   51.89    3.70 
   4  -4  -1   50.59    3.70 
  -4   4   1   51.69    3.30 
  -4   4   1   52.39    3.40 
  -4   4   1   44.60    3.10 
  -4   4   1   52.39    2.90 
  -4   4   1   50.19    3.40 
  -4   4   1   51.69    2.70 
  -4   4   1   51.69    2.50 
   3  -4  -1   99.19    4.70 
   3  -4  -1   92.79    4.50 
   3  -4  -1   87.99    5.70 
   3  -4  -1   95.59    4.90 
   3  -4  -1   96.29    4.30 
   3  -4  -1   91.99    4.30 
   3  -4  -1   93.19    4.60 
   3  -4  -1   94.79    4.40 
   3  -4  -1   97.99    4.50 
   3  -4  -1   94.19    4.70 
  -3   4   1   87.39    4.40 
  -3   4   1  102.89    4.80 
  -3   4   1   96.39    4.80 
  -3   4   1   92.49    4.70 
  -3   4   1   98.99    4.10 
  -3   4   1   92.89    4.60 
  -3   4   1   89.79    4.10 
  -3   4   1   92.29    3.90 
   2  -4  -1  239.98    9.00 
   2  -4  -1  234.18    8.90 
  -2   4   1  225.28    9.00 
  -2   4   1  229.08    9.10 
  -2   4   1  229.78    8.60 
  -2   4   1  234.98    9.20 
  -2   4   1  217.38   10.20 
  -2   4   1  233.58    9.20 
  -2   4   1  225.48   10.50 
  -2   4   1  231.88    9.20 
   1  -4  -1  736.13   26.90 
   1  -4  -1  756.62   27.20 
   1  -4  -1  769.82   26.90 
   1  -4  -1  739.13   28.50 
   1  -4  -1  760.12   27.30 
   1  -4  -1  762.02   27.30 
  -1   4   1  734.13   27.30 
  -1   4   1  790.92   27.50 
  -1   4   1  749.13   28.40 
  -1   4   1  788.52   27.50 
  -1   4   1  771.42   28.90 
  -1   4   1  752.72   26.90 
  -1   4   1  752.72   27.20 
  -1   4   1  808.82   27.50 
  -1   4   1  772.22   27.40 
   0  -4  -1   67.09    4.00 
   0  -4  -1   71.19    2.80 
   0  -4  -1   71.79    3.20 
   0  -4  -1   73.69    3.20 
   0  -4  -1   69.39    3.00 
   0  -4  -1   64.79    2.80 
   0   4   1   68.99    3.20 
   0   4   1   68.99    3.20 
   0   4   1   68.59    3.20 
   0   4   1   71.59    4.20 
   0   4   1   68.39    3.00 
   0   4   1   65.89    3.30 
   0   4   1   65.89    3.20 
   0   4   1   71.69    3.30 
   0   4   1   67.49    3.90 
  -1  -4  -1 2562.44   87.39 
  -1  -4  -1 2382.96   87.49 
  -1  -4  -1 2496.65   87.69 
  -1  -4  -1 2513.35   87.49 
  -1  -4  -1 2541.05   88.79 
  -1  -4  -1 2597.44   87.79 
   1   4   1 2586.54   88.99 
   1   4   1 2543.35   87.79 
   1   4   1 2617.34   87.79 
   1   4   1 2425.56   87.49 
   1   4   1 2504.35   88.49 
   1   4   1 2577.34   87.79 
   1   4   1 2318.57   87.69 
   1   4   1 2471.05   87.69 
   1   4   1 2501.95   87.79 
  -2  -4  -1 1586.44   54.39 
  -2  -4  -1 1424.06   54.19 
  -2  -4  -1 1583.54   53.99 
  -2  -4  -1 1589.84   55.39 
  -2  -4  -1 1526.85   54.09 
   2   4   1 1551.74   54.29 
   2   4   1 1608.24   54.29 
   2   4   1 1523.85   54.39 
   2   4   1 1460.25   54.09 
   2   4   1 1581.84   54.99 
   2   4   1 1609.64   54.29 
   2   4   1 1529.75   54.29 
   2   4   1 1535.45   55.39 
  -3  -4  -1  555.14   19.20 
  -3  -4  -1  534.15   18.80 
  -3  -4  -1  561.64   18.80 
  -3  -4  -1  567.24   20.10 
   3   4   1  552.94   19.10 
   3   4   1  524.55   19.20 
   3   4   1  499.35   19.10 
   3   4   1  545.35   19.10 
   3   4   1  512.75   18.90 
   3   4   1  526.15   19.00 
   3   4   1  520.25   19.10 
   3   4   1  519.85   19.10 
   3   4   1  495.85   19.90 
  -4  -4  -1  514.75   18.00 
  -4  -4  -1  537.05   19.30 
  -4  -4  -1  526.15   18.40 
  -4  -4  -1  518.25   18.60 
  -4  -4  -1  488.85   18.00 
   4   4   1  491.15   18.40 
   4   4   1  491.05   18.40 
   4   4   1  507.45   18.10 
   4   4   1  490.95   18.30 
   4   4   1  512.45   18.30 
   4   4   1  503.35   18.30 
  -5  -4  -1  244.58    9.10 
  -5  -4  -1  238.88   10.30 
  -5  -4  -1  256.17   10.00 
  -5  -4  -1  242.68    9.40 
  -5  -4  -1  246.08    9.10 
   5   4   1  260.67    9.70 
   5   4   1  266.37    9.50 
   5   4   1  257.57    9.40 
   5   4   1  253.27    9.70 
  -6  -4  -1   21.20    2.00 
  -6  -4  -1   22.20    2.30 
  -6  -4  -1   21.20    1.30 
   6   4   1   24.70    1.70 
   6   4   1   20.40    1.90 
   6   4   1   21.20    1.80 
   6   4   1   18.90    2.00 
   6   4   1   22.00    2.20 
   6   4   1   20.50    1.80 
   6   4   1   20.50    2.10 
   6   4   1   18.40    1.50 
   6   4   1   22.00    1.90 
   6   4   1   20.80    1.70 
  -7  -4  -1   41.70    3.40 
  -7  -4  -1   40.20    3.00 
  -7  -4  -1   41.40    2.10 
   7   4   1   42.10    2.70 
   7   4   1   47.40    3.40 
   7   4   1   42.30    3.00 
   7   4   1   41.40    3.30 
   7   4   1   39.60    2.70 
   7   4   1   41.20    2.70 
   7   4   1   37.30    2.30 
   7   4   1   41.60    2.60 
   7   4   1   39.70    2.70 
  -8  -4  -1  312.37   13.60 
  -8  -4  -1  322.17   11.80 
  -8  -4  -1  333.97   12.70 
   8   4   1  309.57   12.30 
   8   4   1  312.77   12.00 
   8   4   1  329.27   13.20 
   8   4   1  329.37   13.30 
   8   4   1  316.77   12.40 
   8   4   1  316.47   12.40 
   8   4   1  318.27   12.60 
   8   4   1  319.07   12.90 
   8   4   1  314.97   12.60 
  -9  -4  -1   61.09    3.00 
  -9  -4  -1   60.49    3.60 
   9   4   1   63.39    3.50 
   9   4   1   63.29    3.80 
   9   4   1   68.29    3.80 
   9   4   1   63.69    4.10 
   9   4   1   65.59    4.30 
   9   4   1   66.09    4.30 
 -10  -4  -1  129.19    5.20 
 -10  -4  -1  128.59    5.30 
  10   4   1  139.49    5.80 
  10   4   1  136.19    5.80 
  10   4   1  134.39    6.10 
  10   4   1  135.29    6.40 
  10   4   1  136.59    6.30 
   6  -5  -1    7.40    1.20 
   6  -5  -1    4.90    1.20 
   6  -5  -1    7.10    1.10 
  -6   5   1    6.40    0.80 
  -6   5   1    5.10    1.20 
   5  -5  -1  307.37   12.20 
   5  -5  -1  302.57   11.50 
   5  -5  -1  292.87   11.80 
   5  -5  -1  296.07   11.80 
  -5   5   1  271.97   11.00 
  -5   5   1  284.97   11.20 
  -5   5   1  311.37   11.00 
   4  -5  -1  104.89    5.60 
   4  -5  -1   98.59    5.20 
   4  -5  -1  102.59    5.40 
   4  -5  -1  101.59    5.00 
   4  -5  -1   94.79    4.80 
   4  -5  -1   99.39    5.10 
  -4   5   1  101.09    4.50 
  -4   5   1  103.09    5.50 
  -4   5   1   98.69    4.60 
  -4   5   1  101.19    4.90 
  -4   5   1   95.99    5.20 
  -4   5   1  103.59    4.30 
   3  -5  -1   62.89    3.70 
   3  -5  -1   64.19    3.70 
   3  -5  -1   66.99    4.00 
   3  -5  -1   65.59    3.60 
   3  -5  -1   62.39    4.00 
   3  -5  -1   63.29    3.50 
   3  -5  -1   64.59    4.10 
   3  -5  -1   64.39    3.70 
  -3   5   1   64.29    3.70 
  -3   5   1   68.39    4.10 
  -3   5   1   64.09    3.90 
  -3   5   1   66.69    3.50 
  -3   5   1   60.19    3.90 
  -3   5   1   68.19    3.30 
  -3   5   1   65.69    3.10 
  -3   5   1   70.79    3.40 
   2  -5  -1  300.17   11.70 
   2  -5  -1  285.27   11.50 
   2  -5  -1  295.57   11.40 
   2  -5  -1  305.37   11.70 
   2  -5  -1  300.37   11.30 
   2  -5  -1  300.87   11.60 
   2  -5  -1  276.97   11.60 
  -2   5   1  297.97   11.70 
  -2   5   1  292.87   11.70 
  -2   5   1  292.87   10.90 
  -2   5   1  302.07   11.70 
  -2   5   1  308.37   11.10 
  -2   5   1  286.97   11.20 
  -2   5   1  278.17   11.50 
  -2   5   1  320.07   11.90 
  -2   5   1  281.07   11.20 
  -2   5   1  300.77   11.30 
   1  -5  -1  397.86   13.90 
   1  -5  -1  364.06   14.40 
   1  -5  -1  370.56   14.40 
   1  -5  -1  381.86   14.40 
   1  -5  -1  398.06   14.50 
   1  -5  -1  406.86   14.50 
   1  -5  -1  390.36   13.90 
   1  -5  -1  373.36   14.50 
   1  -5  -1  416.36   14.30 
   1  -5  -1  385.96   14.60 
  -1   5   1  381.36   14.60 
  -1   5   1  365.06   14.10 
  -1   5   1  404.46   14.60 
  -1   5   1  386.86   14.50 
  -1   5   1  397.06   14.70 
  -1   5   1  321.67   14.30 
  -1   5   1  394.26   14.00 
  -1   5   1  398.56   14.30 
  -1   5   1  376.36   16.30 
  -1   5   1  398.66   14.60 
  -1   5   1  375.16   13.90 
   0  -5  -1 1103.29   38.30 
   0  -5  -1 1073.39   38.00 
   0  -5  -1 1065.09   38.00 
   0  -5  -1  989.50   39.90 
   0  -5  -1 1094.99   38.50 
   0  -5  -1 1076.49   38.50 
   0   5   1 1134.89   38.60 
   0   5   1 1019.80   38.00 
   0   5   1 1063.09   39.70 
   0   5   1 1045.10   38.60 
   0   5   1 1110.59   38.60 
   0   5   1 1115.49   38.60 
   0   5   1 1120.89   38.60 
   0   5   1 1084.69   40.30 
   0   5   1 1114.09   38.50 
   0   5   1 1090.29   38.30 
  -1  -5  -1  106.49    4.50 
  -1  -5  -1  104.39    4.00 
  -1  -5  -1  100.59    4.20 
  -1  -5  -1  104.79    4.40 
  -1  -5  -1  103.29    4.00 
  -1  -5  -1  101.39    5.50 
   1   5   1   99.79    4.40 
   1   5   1  105.39    4.50 
   1   5   1  105.19    4.50 
   1   5   1  102.49    4.50 
   1   5   1   91.69    4.40 
   1   5   1  103.89    5.70 
   1   5   1   97.79    4.20 
   1   5   1   98.89    5.20 
   1   5   1   98.79    4.40 
  -2  -5  -1  688.73   25.10 
  -2  -5  -1  730.33   24.90 
  -2  -5  -1  729.83   26.60 
  -2  -5  -1  728.93   24.80 
  -2  -5  -1  645.84   24.80 
  -2  -5  -1  733.13   25.40 
   2   5   1  718.03   25.20 
   2   5   1  699.13   26.70 
   2   5   1  644.24   25.10 
   2   5   1  720.73   25.30 
   2   5   1  669.83   24.90 
   2   5   1  716.73   25.30 
   2   5   1  703.73   26.10 
   2   5   1  711.43   25.20 
   2   5   1  706.83   25.20 
  -3  -5  -1  672.73   23.30 
  -3  -5  -1  687.43   25.10 
  -3  -5  -1  614.84   23.40 
  -3  -5  -1  694.43   23.90 
  -3  -5  -1  672.83   23.40 
  -3  -5  -1  664.43   23.40 
   3   5   1  691.83   23.70 
   3   5   1  665.73   23.70 
   3   5   1  636.04   23.40 
   3   5   1  661.83   23.70 
   3   5   1  600.14   23.60 
   3   5   1  659.63   23.70 
   3   5   1  679.93   23.80 
   3   5   1  623.24   24.90 
  -4  -5  -1  342.27   13.70 
  -4  -5  -1  337.07   12.00 
  -4  -5  -1  333.77   11.90 
  -4  -5  -1  324.27   12.00 
  -4  -5  -1  345.47   12.50 
   4   5   1  329.87   12.30 
   4   5   1  345.87   12.40 
   4   5   1  328.97   12.30 
   4   5   1  338.57   12.40 
   4   5   1  293.97   12.30 
   4   5   1  321.17   12.10 
  -5  -5  -1  353.66   14.70 
  -5  -5  -1  356.26   13.20 
  -5  -5  -1  351.36   13.20 
  -5  -5  -1  373.56   14.10 
  -5  -5  -1  372.26   13.10 
  -5  -5  -1  364.16   13.60 
   5   5   1  352.46   13.80 
   5   5   1  371.86   13.40 
   5   5   1  375.96   13.70 
   5   5   1  383.96   13.60 
  -6  -5  -1  101.89    4.00 
  -6  -5  -1   88.09    5.30 
  -6  -5  -1   93.59    4.80 
   6   5   1   94.09    4.10 
   6   5   1   97.59    4.70 
   6   5   1   95.89    4.50 
   6   5   1   96.79    4.60 
   6   5   1   95.49    4.90 
   6   5   1   94.29    4.20 
   6   5   1  100.29    4.20 
   6   5   1   99.19    4.40 
   6   5   1   94.19    4.20 
   6   5   1   96.39    4.50 
   6   5   1   96.19    4.90 
  -7  -5  -1  309.07   13.30 
  -7  -5  -1  326.87   11.70 
   7   5   1  297.57   11.90 
   7   5   1  314.77   12.80 
   7   5   1  315.87   12.60 
   7   5   1  298.77   12.20 
   7   5   1  318.87   12.30 
   7   5   1  302.97   11.80 
   7   5   1  332.47   12.80 
   7   5   1  319.67   12.10 
   7   5   1  320.37   12.30 
  -8  -5  -1   19.40    1.60 
  -8  -5  -1   22.30    3.00 
   8   5   1   20.00    2.60 
   8   5   1   18.60    2.00 
   8   5   1   22.00    2.20 
   8   5   1   18.80    1.90 
   8   5   1   18.10    2.00 
   8   5   1   15.90    2.40 
   8   5   1   16.90    2.20 
   8   5   1   18.90    1.80 
  -9  -5  -1  246.88    9.50 
  -9  -5  -1  237.88   10.10 
   9   5   1  256.87   10.80 
   9   5   1  255.37   10.10 
   9   5   1  262.97   10.60 
   9   5   1  251.77   10.20 
   9   5   1  236.58    9.90 
   9   5   1  259.37   10.80 
   9   5   1  249.97    9.90 
 -10  -5  -1   41.20    2.20 
 -10  -5  -1   38.30    2.10 
  10   5   1   42.50    3.30 
  10   5   1   43.00    2.70 
  10   5   1   45.70    3.10 
  10   5   1   40.40    3.10 
  10   5   1   39.60    2.70 
   5  -6  -1   27.50    2.40 
   5  -6  -1   25.50    2.10 
   5  -6  -1   24.80    2.00 
  -5   6   1   25.80    1.90 
  -5   6   1   25.90    1.50 
  -5   6   1   25.40    2.20 
   4  -6  -1    2.70    1.20 
   4  -6  -1    2.40    1.30 
   4  -6  -1    1.80    1.30 
   4  -6  -1    2.30    1.50 
   4  -6  -1    1.50    0.90 
  -4   6   1    5.60    1.60 
  -4   6   1    2.70    0.80 
  -4   6   1    2.50    1.20 
   3  -6  -1  215.18    8.90 
   3  -6  -1  219.18    8.80 
   3  -6  -1  208.38    8.80 
   3  -6  -1  199.78    8.70 
   3  -6  -1  222.38    9.50 
  -3   6   1  200.68    9.30 
  -3   6   1  203.48    8.60 
  -3   6   1  225.28    8.60 
  -3   6   1  216.98    9.20 
  -3   6   1  221.28    8.10 
  -3   6   1  200.18    8.90 
   2  -6  -1   85.09    4.50 
   2  -6  -1   89.89    4.40 
   2  -6  -1   86.99    4.60 
   2  -6  -1   92.19    4.60 
   2  -6  -1   92.19    5.00 
   2  -6  -1   91.69    4.80 
  -2   6   1   84.59    4.70 
  -2   6   1   87.19    4.90 
  -2   6   1   89.89    4.70 
  -2   6   1   99.29    5.10 
  -2   6   1   93.29    4.50 
  -2   6   1   92.09    4.90 
  -2   6   1   91.29    3.90 
  -2   6   1   92.29    4.30 
  -2   6   1   90.69    4.40 
   1  -6  -1  328.27   13.10 
   1  -6  -1  351.06   13.00 
   1  -6  -1  341.57   13.40 
   1  -6  -1  347.77   13.10 
   1  -6  -1  356.26   13.20 
  -1   6   1  322.17   13.40 
  -1   6   1  332.57   13.20 
  -1   6   1  353.56   13.30 
  -1   6   1  349.07   13.40 
  -1   6   1  343.67   12.90 
  -1   6   1  345.97   13.00 
  -1   6   1  311.37   13.20 
  -1   6   1  333.27   12.40 
  -1   6   1  340.77   12.90 
  -1   6   1  338.87   13.20 
   0  -6  -1    4.60    1.10 
   0  -6  -1    2.90    1.00 
   0  -6  -1    4.30    1.00 
   0  -6  -1    2.90    1.00 
   0  -6  -1    4.30    1.20 
   0  -6  -1    3.00    0.70 
   0  -6  -1    2.90    1.00 
   0  -6  -1    3.30    1.00 
   0  -6  -1    3.90    0.80 
   0   6   1    2.10    1.10 
   0   6   1    4.10    1.20 
   0   6   1    2.80    0.90 
   0   6   1    8.10    1.20 
   0   6   1    4.40    1.00 
   0   6   1    6.20    1.40 
   0   6   1    3.10    1.10 
   0   6   1    3.60    1.20 
   0   6   1    2.80    1.00 
   0   6   1    5.10    0.80 
   0   6   1    4.90    1.30 
  -1  -6  -1  341.77   12.00 
  -1  -6  -1  347.37   12.40 
  -1  -6  -1  329.67   12.10 
  -1  -6  -1  322.07   12.30 
  -1  -6  -1  337.97   12.50 
  -1  -6  -1  301.07   12.90 
  -1  -6  -1  319.27   11.90 
  -1  -6  -1  322.17   12.40 
  -1  -6  -1  316.47   12.20 
  -1  -6  -1  301.67   14.00 
   1   6   1  315.47   14.40 
   1   6   1  313.87   12.40 
   1   6   1  338.47   12.50 
   1   6   1  316.47   12.30 
   1   6   1  325.77   12.30 
   1   6   1  344.27   12.50 
   1   6   1  321.37   12.10 
   1   6   1  317.57   12.10 
   1   6   1  335.77   12.40 
   1   6   1  342.67   12.50 
  -2  -6  -1  444.06   15.70 
  -2  -6  -1  444.66   16.00 
  -2  -6  -1  416.56   15.90 
  -2  -6  -1  424.76   15.70 
  -2  -6  -1  442.16   15.60 
  -2  -6  -1  450.95   16.30 
  -2  -6  -1  422.66   17.70 
   2   6   1  429.16   15.70 
   2   6   1  433.46   16.10 
   2   6   1  407.36   17.80 
   2   6   1  407.16   16.00 
   2   6   1  421.46   17.20 
   2   6   1  434.16   16.10 
   2   6   1  449.56   16.10 
   2   6   1  448.76   16.10 
   2   6   1  449.16   16.20 
  -3  -6  -1  163.58    6.10 
  -3  -6  -1  154.78    6.00 
  -3  -6  -1  160.48    6.60 
  -3  -6  -1  149.99    6.50 
  -3  -6  -1  145.19    6.10 
  -3  -6  -1  154.18    7.90 
  -3  -6  -1  150.48    6.20 
   3   6   1  154.08    6.50 
   3   6   1  157.48    6.40 
   3   6   1  162.98    6.60 
   3   6   1  153.08    6.10 
   3   6   1  159.38    6.50 
   3   6   1  154.88    6.40 
   3   6   1  154.98    6.50 
  -4  -6  -1   12.20    1.30 
  -4  -6  -1   12.20    1.20 
  -4  -6  -1    9.80    1.00 
  -4  -6  -1   11.90    1.40 
  -4  -6  -1    8.10    1.20 
  -4  -6  -1    9.40    1.00 
  -4  -6  -1    8.80    1.90 
   4   6   1    8.90    1.40 
   4   6   1   11.30    1.50 
   4   6   1    8.00    1.20 
   4   6   1    9.90    1.40 
   4   6   1   15.50    1.60 
   4   6   1   14.10    1.50 
   4   6   1    8.20    1.20 
   4   6   1    9.10    1.00 
   4   6   1   10.20    1.70 
  -5  -6  -1   49.50    2.50 
  -5  -6  -1   51.89    2.80 
  -5  -6  -1   50.79    3.00 
  -5  -6  -1   56.29    2.70 
  -5  -6  -1   49.30    3.10 
  -5  -6  -1   49.30    2.90 
  -5  -6  -1   53.09    2.50 
  -5  -6  -1   48.50    2.30 
   5   6   1   55.09    3.00 
   5   6   1   50.19    2.70 
   5   6   1   53.09    2.90 
   5   6   1   49.20    2.80 
   5   6   1   50.79    2.90 
   5   6   1   49.00    3.30 
   5   6   1   50.79    3.10 
   5   6   1   50.49    3.30 
   5   6   1   49.20    2.80 
   5   6   1   54.69    2.60 
   5   6   1   49.00    3.00 
   5   6   1   51.19    2.60 
   5   6   1   55.99    2.90 
  -6  -6  -1  258.97    9.70 
  -6  -6  -1  250.37   10.00 
  -6  -6  -1  278.57    9.90 
  -6  -6  -1  245.68   10.70 
   6   6   1  240.38    9.90 
   6   6   1  249.18   10.60 
   6   6   1  264.67   10.80 
   6   6   1  248.58   10.20 
   6   6   1  259.07    9.90 
   6   6   1  280.77   10.30 
   6   6   1  259.27   10.50 
   6   6   1  270.57   10.40 
   6   6   1  267.07    9.90 
   6   6   1  277.87   10.50 
   6   6   1  260.47   10.00 
   6   6   1  262.97   10.50 
  -7  -6  -1  339.47   14.40 
  -7  -6  -1  336.37   12.60 
  -7  -6  -1  348.97   12.80 
   7   6   1  343.67   13.30 
   7   6   1  355.16   13.50 
   7   6   1  351.16   13.40 
   7   6   1  344.17   12.90 
   7   6   1  343.27   13.70 
   7   6   1  341.77   13.50 
   7   6   1  339.57   12.80 
   7   6   1  345.27   13.10 
   7   6   1  335.47   13.70 
   7   6   1  322.47   12.80 
  -8  -6  -1   90.69    4.10 
  -8  -6  -1   89.69    3.90 
   8   6   1   94.59    4.70 
   8   6   1   88.39    4.60 
   8   6   1   87.89    4.40 
   8   6   1   91.09    4.60 
   8   6   1   87.49    4.20 
   8   6   1   78.49    4.20 
   8   6   1   80.89    4.90 
   8   6   1   89.59    5.10 
   8   6   1   80.39    4.70 
  -9  -6  -1   72.79    3.40 
  -9  -6  -1   76.99    3.60 
  -9  -6  -1   78.09    4.10 
   9   6   1   74.29    3.90 
   9   6   1   70.69    4.50 
   9   6   1   73.69    4.30 
   9   6   1   78.59    4.10 
   9   6   1   75.79    4.70 
   9   6   1   71.29    3.80 
   9   6   1   75.79    4.20 
 -10  -6  -1   21.00    1.60 
 -10  -6  -1   22.50    1.70 
  10   6   1   21.90    2.30 
  10   6   1   23.50    2.10 
  10   6   1   22.70    2.00 
  10   6   1   23.10    2.40 
  10   6   1   24.20    2.70 
   4  -7  -1   25.60    1.90 
   4  -7  -1   24.60    2.20 
   4  -7  -1   21.80    1.90 
  -4   7   1   29.40    2.10 
  -4   7   1   25.80    1.90 
   3  -7  -1  105.49    5.20 
   3  -7  -1  108.39    5.30 
   3  -7  -1  114.99    5.70 
   3  -7  -1  119.49    5.20 
  -3   7   1  112.59    5.20 
  -3   7   1  109.79    5.00 
   2  -7  -1   35.50    2.70 
   2  -7  -1   32.60    2.60 
   2  -7  -1   36.50    2.90 
   2  -7  -1   35.60    2.60 
   2  -7  -1   36.90    3.30 
  -2   7   1   30.20    2.70 
  -2   7   1   33.40    2.70 
  -2   7   1   34.40    3.00 
  -2   7   1   33.30    2.50 
  -2   7   1   30.60    2.40 
  -2   7   1   36.00    2.50 
   1  -7  -1  326.57   12.60 
   1  -7  -1  342.57   13.00 
   1  -7  -1  299.77   12.50 
   1  -7  -1  316.47   12.30 
   1  -7  -1  325.97   12.50 
  -1   7   1  333.67   12.90 
  -1   7   1  312.37   12.70 
  -1   7   1  306.17   12.20 
  -1   7   1  320.97   12.30 
  -1   7   1  323.47   12.40 
  -1   7   1  312.57   12.70 
  -1   7   1  307.97   12.60 
   0  -7  -1  213.08    9.00 
   0  -7  -1  226.78    9.50 
   0  -7  -1  224.78    9.10 
   0  -7  -1  218.38    8.80 
   0  -7  -1  222.58    9.00 
   0  -7  -1  203.38    9.10 
   0  -7  -1  211.48    8.40 
   0   7   1  229.48    9.30 
   0   7   1  232.18    8.90 
   0   7   1  214.28    8.80 
   0   7   1  224.58    9.00 
   0   7   1  232.38    9.00 
   0   7   1  219.68    9.20 
   0   7   1  224.58    9.20 
   0   7   1  225.68    9.30 
  -1  -7  -1   42.60    2.80 
  -1  -7  -1   45.10    2.40 
  -1  -7  -1   45.50    2.80 
  -1  -7  -1   44.40    3.20 
  -1  -7  -1   46.80    2.60 
  -1  -7  -1   43.40    2.80 
  -1  -7  -1   42.80    2.90 
  -1  -7  -1   44.50    2.80 
  -1  -7  -1   38.70    2.20 
   1   7   1   43.70    2.60 
   1   7   1   36.80    3.10 
   1   7   1   42.60    2.70 
   1   7   1   45.80    3.10 
   1   7   1   45.60    3.10 
   1   7   1   43.60    3.00 
   1   7   1   46.30    3.00 
   1   7   1   42.40    2.80 
   1   7   1   46.10    3.10 
   1   7   1   44.50    2.70 
  -2  -7  -1  554.34   19.10 
  -2  -7  -1  502.65   19.30 
  -2  -7  -1  530.25   19.50 
  -2  -7  -1  512.85   19.90 
  -2  -7  -1  544.65   19.50 
  -2  -7  -1  524.05   19.40 
  -2  -7  -1  520.55   19.70 
  -2  -7  -1  512.15   19.50 
   2   7   1  544.75   19.80 
   2   7   1  525.95   19.70 
   2   7   1  505.75   19.60 
   2   7   1  540.35   19.60 
   2   7   1  536.65   19.50 
   2   7   1  553.84   19.70 
   2   7   1  495.45   19.10 
   2   7   1  505.05   19.20 
   2   7   1  530.95   19.60 
   2   7   1  542.45   19.70 
  -3  -7  -1  492.15   18.30 
  -3  -7  -1  516.65   18.80 
  -3  -7  -1  537.25   18.40 
  -3  -7  -1  505.35   18.70 
  -3  -7  -1  504.05   18.80 
  -3  -7  -1  457.35   18.10 
  -3  -7  -1  502.45   18.60 
  -3  -7  -1  526.05   19.20 
   3   7   1  530.75   18.90 
   3   7   1  525.95   18.90 
   3   7   1  484.85   18.80 
   3   7   1  481.45   18.80 
   3   7   1  507.85   18.90 
   3   7   1  509.25   18.90 
   3   7   1  527.25   19.00 
   3   7   1  482.75   18.60 
   3   7   1  528.65   19.00 
  -4  -7  -1  534.85   20.30 
  -4  -7  -1  539.45   20.40 
  -4  -7  -1  553.84   19.90 
  -4  -7  -1  563.74   20.80 
  -4  -7  -1  560.04   20.40 
  -4  -7  -1  535.35   19.90 
  -4  -7  -1  579.74   20.00 
  -4  -7  -1  570.44   20.10 
   4   7   1  576.04   20.70 
   4   7   1  543.15   20.50 
   4   7   1  518.65   20.50 
   4   7   1  575.64   20.60 
   4   7   1  580.74   20.40 
   4   7   1  568.54   20.60 
   4   7   1  515.25   20.20 
   4   7   1  561.64   20.50 
   4   7   1  525.55   20.20 
   4   7   1  543.25   20.60 
   4   7   1  568.64   20.50 
  -5  -7  -1   20.30    2.10 
  -5  -7  -1   21.20    2.10 
  -5  -7  -1   23.20    1.90 
  -5  -7  -1   22.10    2.10 
  -5  -7  -1   22.00    1.70 
  -5  -7  -1   21.10    1.90 
  -5  -7  -1   21.90    1.60 
  -5  -7  -1   25.10    2.10 
   5   7   1   22.50    2.00 
   5   7   1   24.30    1.80 
   5   7   1   23.60    2.10 
   5   7   1   22.50    2.10 
   5   7   1   23.70    2.40 
   5   7   1   24.00    2.10 
   5   7   1   25.30    2.20 
   5   7   1   22.20    1.90 
   5   7   1   22.80    2.00 
   5   7   1   22.20    2.20 
  -6  -7  -1   26.90    2.50 
  -6  -7  -1   25.60    2.10 
  -6  -7  -1   27.70    2.30 
  -6  -7  -1   28.30    2.00 
  -6  -7  -1   22.40    2.20 
  -6  -7  -1   23.10    1.70 
   6   7   1   29.80    3.10 
   6   7   1   22.70    2.10 
   6   7   1   24.20    2.00 
   6   7   1   26.20    2.20 
   6   7   1   25.70    2.70 
   6   7   1   24.20    1.90 
   6   7   1   26.40    2.20 
   6   7   1   27.90    2.60 
   6   7   1   25.20    2.40 
   6   7   1   27.10    2.20 
   6   7   1   27.10    2.00 
  -7  -7  -1  108.19    5.10 
  -7  -7  -1  115.09    6.40 
  -7  -7  -1  107.89    5.50 
  -7  -7  -1  112.89    4.90 
  -7  -7  -1  121.59    5.20 
   7   7   1  115.69    5.30 
   7   7   1  123.39    5.00 
   7   7   1  120.09    5.70 
   7   7   1  111.89    5.60 
   7   7   1  109.19    5.30 
   7   7   1  109.29    5.90 
   7   7   1  109.39    5.70 
   7   7   1  112.19    5.00 
   7   7   1  115.29    5.50 
  -8  -7  -1  152.88    6.40 
  -8  -7  -1  154.88    6.20 
  -8  -7  -1  151.18    6.90 
   8   7   1  146.69    6.60 
   8   7   1  145.19    6.20 
   8   7   1  162.18    7.00 
   8   7   1  160.58    7.40 
   8   7   1  155.38    6.90 
   8   7   1  153.88    7.10 
   8   7   1  148.79    7.20 
   8   7   1  161.18    7.10 
   8   7   1  156.58    6.50 
  -9  -7  -1    3.20    0.90 
  -9  -7  -1    5.50    1.20 
  -9  -7  -1    2.70    1.40 
   9   7   1    5.10    1.40 
   9   7   1    3.50    1.40 
   9   7   1    3.80    1.40 
   9   7   1    6.40    2.00 
   9   7   1    2.70    1.20 
   9   7   1    4.60    1.50 
 -10  -7  -1    8.10    1.00 
 -10  -7  -1    5.00    1.30 
  10   7   1    6.70    1.20 
  10   7   1    9.40    1.80 
  10   7   1    7.60    1.30 
  10   7   1    8.40    1.50 
  10   7   1    8.90    1.50 
   3  -8  -1   28.10    2.00 
   3  -8  -1   30.10    1.90 
  -3   8   1   25.20    2.40 
  -3   8   1   29.90    2.00 
   2  -8  -1   92.49    4.50 
   2  -8  -1  103.09    4.60 
   2  -8  -1   99.69    4.80 
   2  -8  -1   95.09    4.90 
  -2   8   1  107.39    4.50 
  -2   8   1   84.69    4.40 
  -2   8   1   97.69    4.40 
   1  -8  -1   80.29    4.10 
   1  -8  -1   77.49    4.10 
   1  -8  -1   82.79    4.30 
   1  -8  -1   85.69    4.70 
   1  -8  -1   85.09    4.50 
  -1   8   1   77.99    4.00 
  -1   8   1   82.79    4.10 
  -1   8   1   69.69    4.40 
   0  -8  -1   36.00    2.60 
   0  -8  -1   35.60    2.70 
   0  -8  -1   35.20    3.00 
   0  -8  -1   34.70    2.60 
   0   8   1   35.60    2.70 
   0   8   1   29.90    2.70 
   0   8   1   30.20    2.70 
   0   8   1   30.90    2.80 
   0   8   1   33.80    2.50 
   0   8   1   31.70    2.50 
  -1  -8  -1  423.96   15.60 
  -1  -8  -1  430.36   15.90 
  -1  -8  -1  433.46   16.30 
  -1  -8  -1  425.26   16.70 
  -1  -8  -1  428.16   16.20 
  -1  -8  -1  422.96   16.00 
  -1  -8  -1  390.26   16.30 
  -1  -8  -1  448.96   16.20 
   1   8   1  395.66   16.20 
   1   8   1  430.16   16.40 
   1   8   1  402.26   16.30 
   1   8   1  414.76   16.40 
   1   8   1  457.65   16.30 
   1   8   1  426.96   16.40 
   1   8   1  431.06   16.20 
   1   8   1  442.46   15.90 
  -2  -8  -1  117.79    4.90 
  -2  -8  -1  104.49    5.40 
  -2  -8  -1  116.79    5.80 
  -2  -8  -1  120.29    5.40 
  -2  -8  -1  107.69    5.10 
  -2  -8  -1  107.79    5.30 
  -2  -8  -1  112.59    5.30 
  -2  -8  -1  121.59    5.40 
   2   8   1  104.49    5.50 
   2   8   1  112.79    5.00 
   2   8   1  121.19    5.60 
   2   8   1  118.49    5.40 
   2   8   1  112.29    5.50 
   2   8   1  117.29    5.50 
   2   8   1  108.49    5.30 
   2   8   1  110.79    5.50 
  -3  -8  -1 1344.97   46.90 
  -3  -8  -1 1352.56   47.00 
  -3  -8  -1 1288.07   47.30 
  -3  -8  -1 1249.07   46.70 
  -3  -8  -1 1296.37   46.90 
  -3  -8  -1 1380.26   46.50 
   3   8   1 1211.28   46.90 
   3   8   1 1254.47   46.90 
   3   8   1 1390.56   47.20 
   3   8   1 1312.27   47.10 
   3   8   1 1349.07   47.10 
   3   8   1 1332.17   47.10 
   3   8   1 1298.97   46.80 
   3   8   1 1310.87   47.20 
   3   8   1 1315.67   46.90 
  -4  -8  -1   77.39    4.10 
  -4  -8  -1   81.39    4.20 
  -4  -8  -1   82.29    3.70 
  -4  -8  -1   80.79    4.40 
  -4  -8  -1   79.59    4.10 
  -4  -8  -1   77.99    3.50 
   4   8   1   81.29    4.30 
   4   8   1   71.99    4.10 
   4   8   1   78.39    4.00 
   4   8   1   78.39    4.30 
   4   8   1   75.69    4.20 
   4   8   1   82.79    4.30 
   4   8   1   75.49    4.10 
   4   8   1   76.99    3.90 
  -5  -8  -1  159.18    7.40 
  -5  -8  -1  166.28    6.60 
  -5  -8  -1  166.88    7.20 
  -5  -8  -1  164.48    7.10 
  -5  -8  -1  158.18    6.80 
  -5  -8  -1  167.28    6.70 
  -5  -8  -1  156.68    7.10 
   5   8   1  165.28    7.00 
   5   8   1  165.68    7.40 
   5   8   1  163.48    7.20 
   5   8   1  169.78    7.10 
   5   8   1  162.98    7.10 
   5   8   1  168.18    7.40 
   5   8   1  172.98    7.20 
   5   8   1  169.18    7.30 
   5   8   1  174.18    7.40 
  -6  -8  -1   25.10    2.00 
  -6  -8  -1   24.20    2.10 
  -6  -8  -1   19.90    2.20 
  -6  -8  -1   21.20    2.20 
  -6  -8  -1   22.00    1.70 
  -6  -8  -1   25.10    2.20 
   6   8   1   24.60    2.50 
   6   8   1   21.00    2.10 
   6   8   1   25.10    2.60 
   6   8   1   22.40    2.30 
   6   8   1   23.20    2.10 
   6   8   1   23.40    2.20 
   6   8   1   23.40    2.30 
   6   8   1   23.60    2.00 
  -7  -8  -1   39.60    2.40 
  -7  -8  -1   34.70    2.60 
  -7  -8  -1   35.40    2.60 
  -7  -8  -1   32.80    2.80 
   7   8   1   38.70    3.10 
   7   8   1   36.00    3.20 
   7   8   1   34.00    2.70 
   7   8   1   37.70    3.10 
   7   8   1   37.20    2.80 
   7   8   1   37.60    2.60 
   7   8   1   36.70    2.40 
  -8  -8  -1   29.70    2.10 
  -8  -8  -1   18.70    3.00 
  -8  -8  -1   28.20    2.30 
   8   8   1   24.70    2.30 
   8   8   1   29.90    2.80 
   8   8   1   29.90    2.20 
   8   8   1   31.30    2.80 
   8   8   1   28.90    2.10 
   8   8   1   26.30    2.60 
   8   8   1   28.10    2.50 
  -9  -8  -1   12.90    1.40 
  -9  -8  -1   15.40    1.40 
   9   8   1   13.50    1.50 
   9   8   1   14.70    1.80 
   9   8   1   13.30    1.80 
   9   8   1   11.50    1.60 
   9   8   1   15.10    1.80 
 -10  -8  -1   16.00    1.30 
  10   8   1   10.40    1.40 
  10   8   1   10.90    1.30 
  10   8   1   15.60    1.50 
   1  -9  -1   99.29    4.40 
   1  -9  -1   95.09    4.50 
   1  -9  -1   90.59    4.60 
  -1   9   1   97.09    4.30 
  -1   9   1   97.19    4.30 
   0  -9  -1  169.88    7.00 
   0  -9  -1  152.38    7.20 
   0  -9  -1  179.08    7.50 
   0   9   1  169.88    7.00 
   0   9   1  162.28    6.80 
  -1  -9  -1   29.80    2.90 
  -1  -9  -1   31.90    2.50 
   1   9   1   27.60    2.30 
   1   9   1   30.40    2.30 
   1   9   1   26.20    2.30 
   1   9   1   28.90    2.70 
  -2  -9  -1   24.20    2.20 
  -2  -9  -1   25.70    2.40 
  -2  -9  -1   22.80    1.80 
  -2  -9  -1   24.20    2.40 
  -2  -9  -1   25.50    2.80 
   2   9   1   24.70    2.30 
   2   9   1   20.60    2.30 
   2   9   1   25.00    2.40 
   2   9   1   26.50    2.10 
   2   9   1   23.60    2.50 
   2   9   1   21.20    2.30 
   2   9   1   22.30    2.40 
  -3  -9  -1  130.79    6.10 
  -3  -9  -1  138.29    6.10 
  -3  -9  -1  130.29    5.60 
   3   9   1  128.79    6.20 
   3   9   1  128.79    6.00 
   3   9   1  138.79    6.30 
   3   9   1  138.19    6.20 
   3   9   1  143.39    6.40 
   3   9   1  127.59    6.10 
   3   9   1  133.59    6.00 
  -4  -9  -1   59.99    3.60 
  -4  -9  -1   55.59    2.90 
  -4  -9  -1   62.69    3.60 
  -4  -9  -1   57.29    3.30 
   4   9   1   57.69    3.30 
   4   9   1   55.49    3.50 
   4   9   1   56.19    3.50 
   4   9   1   61.29    3.70 
   4   9   1   53.79    3.50 
   4   9   1   57.99    3.30 
   4   9   1   59.69    3.50 
  -5  -9  -1  221.48    8.90 
  -5  -9  -1  232.68    9.50 
  -5  -9  -1  244.78    9.60 
   5   9   1  233.88    9.60 
   5   9   1  234.28    9.40 
   5   9   1  235.28    9.10 
   5   9   1  237.38    9.70 
   5   9   1  244.08    9.60 
   5   9   1  211.88    9.50 
  -6  -9  -1  154.78    6.40 
  -6  -9  -1  140.79    6.20 
  -6  -9  -1  139.29    5.60 
  -6  -9  -1  125.39    5.60 
   6   9   1  153.98    6.60 
   6   9   1  140.89    5.90 
   6   9   1  136.49    6.10 
   6   9   1  136.89    6.10 
   6   9   1  136.59    6.10 
   6   9   1  141.99    6.30 
   6   9   1  129.49    6.20 
  -7  -9  -1  336.87   12.60 
  -7  -9  -1  333.27   12.10 
  -7  -9  -1  305.67   12.30 
  -7  -9  -1  342.17   12.80 
   7   9   1  316.47   12.80 
   7   9   1  347.67   12.40 
   7   9   1  337.87   13.00 
   7   9   1  327.07   12.70 
   7   9   1  311.17   12.50 
  -8  -9  -1   15.50    1.90 
  -8  -9  -1   17.70    1.50 
  -8  -9  -1   11.90    1.40 
  -8  -9  -1   18.80    1.70 
   8   9   1   19.40    2.00 
   8   9   1   16.50    2.00 
   8   9   1   13.50    1.70 
   8   9   1   15.40    1.50 
  -9  -9  -1   18.60    1.30 
  -9  -9  -1   16.60    1.70 
   9   9   1   16.80    1.80 
   9   9   1   17.70    1.80 
   9   9   1   17.70    1.80 
   0 -10  -1    2.50    1.00 
   0 -10  -1    0.90    0.90 
   0  10   1    0.90    0.80 
  -1 -10  -1   20.70    1.80 
  -1 -10  -1   17.60    1.90 
  -1 -10  -1   16.30    1.80 
   1  10   1   15.20    1.70 
   1  10   1   17.10    1.80 
  -2 -10  -1    9.60    1.70 
  -2 -10  -1   10.40    1.50 
   2  10   1    8.80    1.60 
   2  10   1    9.00    1.30 
   2  10   1    8.90    1.20 
  -3 -10  -1  108.89    5.00 
  -3 -10  -1  101.69    4.80 
  -3 -10  -1   97.29    5.30 
   3  10   1  110.29    5.00 
   3  10   1   93.89    4.40 
   3  10   1  107.19    4.80 
   3  10   1  113.19    5.20 
  -4 -10  -1   51.39    3.20 
  -4 -10  -1   51.79    3.10 
   4  10   1   46.40    3.10 
   4  10   1   47.90    3.20 
   4  10   1   49.50    2.90 
   4  10   1   47.70    2.60 
  -5 -10  -1   67.59    3.70 
  -5 -10  -1   62.39    3.40 
  -5 -10  -1   70.09    3.60 
   5  10   1   71.99    3.80 
   5  10   1   62.39    3.60 
   5  10   1   68.29    3.30 
   5  10   1   68.39    3.80 
  -6 -10  -1  303.27   11.30 
  -6 -10  -1  289.47   11.20 
  -6 -10  -1  268.37   11.00 
   6  10   1  288.77   11.30 
   6  10   1  302.37   11.00 
   6  10   1  280.67   11.00 
   6  10   1  297.77   11.50 
  -7 -10  -1   24.90    2.10 
  -7 -10  -1   29.40    2.30 
  -7 -10  -1   21.20    2.00 
   7  10   1   29.70    1.90 
   7  10   1   25.80    2.40 
   7  10   1   25.00    2.00 
  -8 -10  -1   45.70    2.50 
  -8 -10  -1   51.49    2.80 
   8  10   1   51.19    2.50 
   8  10   1   53.89    3.00 
   8  10   1   45.70    2.60 
  -3 -11  -1  122.09    5.50 
   3  11   1  140.39    5.60 
  -4 -11  -1   42.30    2.40 
  -4 -11  -1   42.60    2.50 
   4  11   1   44.70    2.60 
   4  11   1   45.10    2.60 
   4  11   1   44.20    2.70 
  -5 -11  -1   14.50    1.50 
  -5 -11  -1   15.20    1.50 
   5  11   1   14.60    1.20 
   5  11   1   15.00    1.50 
   5  11   1   13.30    1.40 
  -6 -11  -1    5.50    1.00 
  -6 -11  -1    5.40    1.00 
   6  11   1    4.00    0.70 
   6  11   1    3.80    0.90 
   7  10  -2   28.80    2.10 
  -7 -10   2   35.50    2.50 
   6  10  -2    4.80    1.00 
   6  10  -2    5.80    0.90 
  -6 -10   2    5.20    1.10 
  -6 -10   2    5.20    1.10 
  -6 -10   2    3.90    1.00 
   5  10  -2   58.09    2.90 
   5  10  -2   67.39    3.40 
   5  10  -2   62.29    3.30 
   5  10  -2   68.59    3.10 
  -5 -10   2   63.69    3.20 
  -5 -10   2   67.79    3.30 
  -5 -10   2   68.19    3.40 
   4  10  -2   32.80    2.30 
   4  10  -2   29.80    2.10 
   4  10  -2   28.80    2.20 
   4  10  -2   28.90    2.10 
   4  10  -2   29.50    1.90 
  -4 -10   2   30.10    2.10 
  -4 -10   2   30.50    2.30 
  -4 -10   2   27.00    2.10 
   3  10  -2   15.50    1.70 
   3  10  -2   14.30    1.60 
   3  10  -2   14.50    1.50 
   3  10  -2   15.80    1.60 
  -3 -10   2   18.60    1.70 
  -3 -10   2   13.90    1.50 
  -3 -10   2   11.10    1.30 
   2  10  -2   28.30    2.00 
   2  10  -2   28.50    2.30 
   2  10  -2   26.50    1.90 
  -2 -10   2   27.50    1.90 
  -2 -10   2   28.30    1.90 
  -2 -10   2   29.80    2.00 
   1  10  -2   52.29    2.80 
   1  10  -2   50.29    2.60 
   8   9  -2    1.70    0.70 
   8   9  -2    2.40    0.90 
  -8  -9   2    2.00    0.60 
  -8  -9   2    0.50    1.20 
   7   9  -2    7.90    1.20 
   7   9  -2   11.60    1.30 
   7   9  -2   10.30    1.30 
  -7  -9   2   12.70    1.20 
  -7  -9   2    9.30    1.30 
   6   9  -2  268.37   10.30 
   6   9  -2  279.27   10.00 
   6   9  -2  233.68   10.00 
  -6  -9   2  255.37   10.00 
  -6  -9   2  267.17   10.20 
  -6  -9   2  271.77    9.70 
  -6  -9   2  233.38    9.80 
   5   9  -2   35.60    2.30 
   5   9  -2   31.30    2.30 
   5   9  -2   36.70    2.80 
   5   9  -2   34.10    2.30 
   5   9  -2   29.40    2.60 
   5   9  -2   33.80    2.70 
  -5  -9   2   36.40    2.60 
  -5  -9   2   35.80    2.60 
  -5  -9   2   33.20    2.00 
  -5  -9   2   37.10    2.90 
   4   9  -2  241.58    9.90 
   4   9  -2  238.18    9.40 
   4   9  -2  248.18    9.70 
   4   9  -2  250.27    9.70 
  -4  -9   2  247.38    9.80 
  -4  -9   2  238.48    9.70 
  -4  -9   2  236.38    9.70 
   3   9  -2  110.69    5.20 
   3   9  -2  100.19    5.00 
   3   9  -2  107.09    5.20 
  -3  -9   2  106.79    5.10 
  -3  -9   2  107.59    5.10 
  -3  -9   2  111.19    5.10 
   2   9  -2   91.09    4.70 
   2   9  -2   91.29    4.50 
   2   9  -2   89.19    4.50 
  -2  -9   2   91.89    4.50 
  -2  -9   2   92.59    4.60 
  -2  -9   2   91.59    4.50 
   1   9  -2   36.40    2.90 
   1   9  -2   35.00    2.50 
   1   9  -2   38.30    2.70 
  -1  -9   2   36.20    2.50 
  -1  -9   2   37.70    2.50 
  -1  -9   2   39.40    2.70 
  -1  -9   2   37.00    3.10 
   0   9  -2   20.30    2.20 
   0   9  -2   21.10    1.90 
   0  -9   2   18.50    1.70 
   0  -9   2   21.30    2.30 
   0  -9   2   23.10    2.00 
  -1   9  -2    3.50    1.20 
  -1   9  -2    3.20    0.90 
  -1   9  -2    4.90    1.20 
   1  -9   2    3.60    1.00 
   9   8  -2   37.40    2.30 
   9   8  -2   36.10    2.10 
   9   8  -2   36.20    2.50 
   9   8  -2   37.40    2.50 
  -9  -8   2   38.20    1.90 
   8   8  -2  199.68    8.10 
   8   8  -2  176.28    8.00 
   8   8  -2  189.38    7.50 
   8   8  -2  192.38    7.90 
   8   8  -2  181.68    7.70 
  -8  -8   2  190.28    7.70 
  -8  -8   2  206.38    7.40 
  -8  -8   2  196.68    7.50 
   7   8  -2  392.46   15.90 
   7   8  -2  407.06   16.00 
   7   8  -2  430.56   15.80 
   7   8  -2  440.36   16.50 
   7   8  -2  446.36   16.50 
   7   8  -2  426.36   16.20 
   7   8  -2  415.06   16.40 
  -7  -8   2  446.36   16.20 
  -7  -8   2  418.26   15.80 
  -7  -8   2  452.35   15.60 
   6   8  -2   90.89    4.80 
   6   8  -2   92.09    4.90 
   6   8  -2   82.19    4.30 
   6   8  -2   77.79    4.30 
   6   8  -2   82.39    4.40 
   6   8  -2   81.19    4.70 
   6   8  -2   85.89    4.10 
  -6  -8   2   83.29    4.10 
  -6  -8   2   81.59    3.80 
  -6  -8   2   82.19    4.00 
  -6  -8   2   84.39    4.40 
  -6  -8   2   89.19    3.90 
   5   8  -2   89.59    4.60 
   5   8  -2   95.09    4.80 
   5   8  -2   98.49    4.90 
   5   8  -2   90.39    5.10 
   5   8  -2   98.69    5.00 
   5   8  -2   94.69    4.40 
   5   8  -2   94.79    4.60 
   5   8  -2   90.29    4.50 
   5   8  -2   96.09    4.40 
  -5  -8   2   98.29    4.50 
  -5  -8   2   99.49    4.70 
  -5  -8   2  103.09    4.80 
  -5  -8   2   95.89    4.30 
  -5  -8   2  100.49    4.30 
   4   8  -2   51.09    3.40 
   4   8  -2   48.20    2.90 
   4   8  -2   51.69    3.00 
   4   8  -2   52.19    3.40 
   4   8  -2   51.29    3.20 
   4   8  -2   49.80    3.10 
   4   8  -2   52.49    3.40 
  -4  -8   2   54.49    2.80 
  -4  -8   2   49.60    3.00 
  -4  -8   2   55.19    3.30 
  -4  -8   2   54.39    2.80 
  -4  -8   2   54.09    3.30 
   3   8  -2  251.97   10.00 
   3   8  -2  245.18    9.80 
   3   8  -2  237.38    9.80 
   3   8  -2  232.08    9.70 
   3   8  -2  234.78   10.10 
   3   8  -2  241.18   10.10 
   3   8  -2  255.97   10.10 
   3   8  -2  237.38    9.40 
  -3  -8   2  253.27    9.80 
  -3  -8   2  246.88    9.90 
  -3  -8   2  248.88    9.90 
  -3  -8   2  245.48    9.40 
  -3  -8   2  240.58    9.10 
  -3  -8   2  231.98    9.70 
   2   8  -2   73.29    4.10 
   2   8  -2   80.99    4.40 
   2   8  -2   79.89    4.20 
   2   8  -2   79.79    4.50 
   2   8  -2   76.29    4.30 
  -2  -8   2   75.99    4.10 
  -2  -8   2   79.09    4.20 
  -2  -8   2   73.79    3.60 
  -2  -8   2   78.69    4.20 
  -2  -8   2   72.49    4.00 
   1   8  -2    2.70    1.10 
   1   8  -2    3.20    1.10 
   1   8  -2    4.40    1.40 
   1   8  -2    3.50    1.40 
   1   8  -2    3.00    1.40 
  -1  -8   2    3.10    1.00 
  -1  -8   2    3.40    1.30 
  -1  -8   2    4.00    1.30 
  -1  -8   2    4.50    1.40 
  -1  -8   2    3.60    1.60 
  -1  -8   2    4.20    1.50 
   0   8  -2   78.59    3.90 
   0   8  -2   81.59    4.10 
   0   8  -2   76.29    4.30 
   0   8  -2   76.59    4.40 
   0   8  -2   75.39    4.40 
   0  -8   2   73.39    4.00 
   0  -8   2   80.39    4.10 
   0  -8   2   77.79    4.60 
   0  -8   2   77.99    4.00 
   0  -8   2   74.29    3.80 
   0  -8   2   75.29    3.90 
  -1   8  -2   96.39    4.90 
  -1   8  -2   99.29    4.60 
  -1   8  -2   92.19    4.50 
   1  -8   2   94.99    4.60 
   1  -8   2  102.69    5.20 
   1  -8   2   97.99    4.70 
  -2   8  -2  143.49    6.00 
  -2   8  -2  154.28    6.10 
   2  -8   2  135.49    5.90 
   2  -8   2  155.28    6.20 
  -3   8  -2  157.28    6.20 
   3  -8   2  161.08    6.30 
   3  -8   2  149.69    6.60 
   9   7  -2   12.40    1.70 
   9   7  -2   14.90    1.60 
   9   7  -2   16.50    1.70 
   9   7  -2   13.80    1.90 
  -9  -7   2   13.50    1.20 
   8   7  -2  271.27   11.00 
   8   7  -2  281.17   10.70 
   8   7  -2  281.37   11.50 
   8   7  -2  298.07   11.50 
   8   7  -2  283.17   11.20 
  -8  -7   2  278.57   10.60 
  -8  -7   2  269.57   10.40 
   7   7  -2   37.30    2.90 
   7   7  -2   40.20    3.40 
   7   7  -2   37.10    2.50 
   7   7  -2   34.70    2.50 
   7   7  -2   39.90    3.40 
   7   7  -2   35.80    2.90 
   7   7  -2   32.70    2.70 
  -7  -7   2   37.10    2.50 
  -7  -7   2   35.90    2.30 
   6   7  -2  317.57   13.20 
   6   7  -2  326.27   12.50 
   6   7  -2  342.27   13.10 
   6   7  -2  339.87   12.80 
   6   7  -2  347.37   12.40 
   6   7  -2  326.67   12.80 
   6   7  -2  342.47   13.20 
   6   7  -2  321.77   12.60 
  -6  -7   2  265.67   13.50 
  -6  -7   2  316.87   12.10 
  -6  -7   2  328.67   12.30 
  -6  -7   2  318.27   12.10 
   5   7  -2  335.67   13.20 
   5   7  -2  345.47   13.00 
   5   7  -2  340.37   12.50 
   5   7  -2  308.17   12.40 
   5   7  -2  323.27   13.20 
   5   7  -2  346.67   13.00 
   5   7  -2  317.27   12.80 
   5   7  -2  322.47   12.60 
   5   7  -2  340.17   13.20 
   5   7  -2  327.07   12.70 
  -5  -7   2  346.27   12.30 
  -5  -7   2  312.27   13.00 
  -5  -7   2  313.97   12.70 
  -5  -7   2  342.47   12.50 
  -5  -7   2  330.97   12.30 
  -5  -7   2  325.97   12.60 
   4   7  -2   61.99    3.50 
   4   7  -2   60.49    3.20 
   4   7  -2   62.09    3.30 
   4   7  -2   61.09    3.90 
   4   7  -2   60.19    3.30 
   4   7  -2   52.79    3.20 
   4   7  -2   55.89    3.80 
   4   7  -2   58.69    3.10 
   4   7  -2   61.29    3.60 
   4   7  -2   56.59    3.50 
  -4  -7   2   57.89    3.20 
  -4  -7   2   56.99    3.30 
  -4  -7   2   59.09    3.40 
  -4  -7   2   56.29    3.50 
  -4  -7   2   61.79    3.00 
  -4  -7   2   59.09    2.90 
   3   7  -2  341.87   13.10 
   3   7  -2  355.86   13.90 
   3   7  -2  350.36   13.70 
   3   7  -2  346.47   13.40 
   3   7  -2  338.57   13.70 
   3   7  -2  354.66   13.60 
   3   7  -2  353.36   13.50 
   3   7  -2  361.56   13.80 
   3   7  -2  350.96   13.90 
  -3  -7   2  337.57   13.40 
  -3  -7   2  350.76   13.20 
  -3  -7   2  353.56   13.50 
  -3  -7   2  346.47   13.50 
  -3  -7   2  363.06   13.00 
  -3  -7   2  384.46   13.20 
  -3  -7   2  360.96   13.90 
   2   7  -2   27.50    2.40 
   2   7  -2   24.70    1.90 
   2   7  -2   26.90    2.30 
   2   7  -2   29.40    2.30 
   2   7  -2   26.50    2.00 
   2   7  -2   25.70    2.50 
   2   7  -2   27.50    2.60 
  -2  -7   2   24.40    2.10 
  -2  -7   2   26.70    1.80 
  -2  -7   2   26.60    2.30 
  -2  -7   2   24.80    2.10 
  -2  -7   2   28.80    1.90 
  -2  -7   2   25.90    2.40 
  -2  -7   2   25.70    2.30 
   1   7  -2  160.18    7.10 
   1   7  -2  150.18    6.70 
   1   7  -2  147.89    6.30 
   1   7  -2  145.09    6.50 
   1   7  -2  137.89    6.50 
   1   7  -2  134.09    6.20 
  -1  -7   2  129.39    6.70 
  -1  -7   2  145.79    5.80 
  -1  -7   2  133.89    6.40 
  -1  -7   2  147.99    6.40 
  -1  -7   2  148.39    6.50 
  -1  -7   2  141.69    6.30 
  -1  -7   2  144.99    6.30 
  -1  -7   2  143.49    6.10 
   0   7  -2   24.20    2.40 
   0   7  -2   30.00    2.40 
   0   7  -2   29.90    2.80 
   0   7  -2   30.70    2.70 
   0   7  -2   26.90    2.30 
   0   7  -2   26.40    2.20 
   0  -7   2   26.90    2.80 
   0  -7   2   26.10    2.40 
   0  -7   2   28.00    2.20 
   0  -7   2   26.90    2.50 
   0  -7   2   31.40    2.50 
   0  -7   2   26.50    1.80 
   0  -7   2   31.20    2.50 
  -1   7  -2  199.28    8.00 
  -1   7  -2  182.48    8.30 
  -1   7  -2  195.78    7.90 
  -1   7  -2  193.98    8.40 
  -1   7  -2  191.08    8.30 
   1  -7   2  198.68    8.10 
   1  -7   2  188.58    8.50 
   1  -7   2  184.98    7.90 
   1  -7   2  198.08    8.00 
   1  -7   2  194.38    8.20 
   1  -7   2  175.68    7.70 
  -2   7  -2   97.19    4.50 
  -2   7  -2   87.79    4.40 
  -2   7  -2   92.19    4.90 
  -2   7  -2   87.69    4.80 
  -2   7  -2   90.19    4.60 
   2  -7   2   90.99    4.50 
   2  -7   2   97.79    4.60 
   2  -7   2   91.09    4.40 
   2  -7   2   90.99    4.90 
   2  -7   2   89.99    4.50 
  -3   7  -2   44.70    2.80 
  -3   7  -2   44.90    2.90 
   3  -7   2   45.70    3.20 
   3  -7   2   46.80    2.70 
   3  -7   2   45.10    2.90 
  -4   7  -2   41.40    2.60 
  -4   7  -2   45.30    2.60 
   4  -7   2   45.50    2.80 
   4  -7   2   44.30    2.50 
   4  -7   2   46.60    2.50 
  10   6  -2   92.09    4.90 
  10   6  -2   88.79    5.00 
   9   6  -2    7.70    1.60 
   9   6  -2    7.20    1.80 
   9   6  -2    7.90    1.40 
   9   6  -2    9.20    1.50 
   9   6  -2    6.90    1.80 
  -9  -6   2    6.80    1.00 
   8   6  -2   84.59    4.70 
   8   6  -2   80.99    4.20 
   8   6  -2   75.59    3.60 
   8   6  -2   79.99    4.30 
   8   6  -2   73.59    3.90 
   8   6  -2   76.79    4.70 
   8   6  -2   74.29    4.60 
  -8  -6   2   74.79    3.60 
   7   6  -2  210.68    9.20 
   7   6  -2  212.98    9.00 
   7   6  -2  196.38    8.80 
   7   6  -2  205.88    8.10 
   7   6  -2  200.68    8.50 
   7   6  -2  208.38    8.60 
   7   6  -2  192.38    8.30 
   7   6  -2  196.88    8.60 
  -7  -6   2  200.38    7.90 
   6   6  -2  149.39    6.30 
   6   6  -2  149.88    6.90 
   6   6  -2  152.58    6.70 
   6   6  -2  170.18    7.10 
   6   6  -2  155.08    6.50 
   6   6  -2  148.89    7.00 
   6   6  -2  145.49    6.50 
   6   6  -2  144.29    6.60 
   6   6  -2  142.19    7.10 
  -6  -6   2  143.59    6.70 
  -6  -6   2  151.58    6.00 
  -6  -6   2  155.38    6.20 
   5   6  -2   47.10    2.60 
   5   6  -2   44.90    2.90 
   5   6  -2   42.20    2.50 
   5   6  -2   41.10    3.20 
   5   6  -2   46.80    3.10 
   5   6  -2   41.00    2.70 
   5   6  -2   41.50    2.80 
   5   6  -2   46.00    2.90 
   5   6  -2   45.80    3.30 
   5   6  -2   44.00    3.20 
  -5  -6   2   40.80    2.20 
  -5  -6   2   41.70    2.40 
  -5  -6   2   46.30    2.30 
  -5  -6   2   48.10    2.60 
  -5  -6   2   43.70    2.90 
   4   6  -2  218.28    8.60 
   4   6  -2  216.38    8.80 
   4   6  -2  233.48    8.90 
   4   6  -2  222.68    8.40 
   4   6  -2  220.88    9.00 
   4   6  -2  229.68    9.10 
   4   6  -2  209.88    8.70 
   4   6  -2  202.38    8.40 
   4   6  -2  206.78    8.50 
   4   6  -2  218.48    8.80 
   4   6  -2  202.78    8.50 
   4   6  -2  208.28    9.00 
  -4  -6   2  230.48    9.00 
  -4  -6   2  222.88    8.40 
  -4  -6   2  210.38    8.50 
  -4  -6   2  210.08    8.20 
  -4  -6   2  227.88    8.30 
  -4  -6   2  213.78    8.20 
   3   6  -2  163.88    6.70 
   3   6  -2  158.98    6.90 
   3   6  -2  160.58    7.10 
   3   6  -2  160.58    6.80 
   3   6  -2  167.28    7.00 
   3   6  -2  157.88    6.50 
   3   6  -2  164.48    6.80 
   3   6  -2  168.38    6.70 
   3   6  -2  154.18    6.90 
   3   6  -2  166.48    7.10 
   3   6  -2  180.38    7.10 
   3   6  -2  163.08    6.70 
  -3  -6   2  160.18    6.80 
  -3  -6   2  171.88    6.50 
  -3  -6   2  174.18    6.60 
  -3  -6   2  153.58    6.70 
  -3  -6   2  166.48    6.40 
  -3  -6   2  160.08    6.40 
  -3  -6   2  172.88    7.10 
  -3  -6   2  157.48    6.70 
   2   6  -2  392.26   15.00 
   2   6  -2  381.96   15.00 
   2   6  -2  384.06   14.90 
   2   6  -2  385.76   15.20 
   2   6  -2  417.26   15.20 
   2   6  -2  394.16   14.90 
   2   6  -2  392.86   14.80 
   2   6  -2  415.36   15.30 
   2   6  -2  412.46   15.10 
  -2  -6   2  424.06   14.60 
  -2  -6   2  391.96   14.50 
  -2  -6   2  413.96   15.00 
  -2  -6   2  392.86   14.70 
  -2  -6   2  422.26   15.30 
  -2  -6   2  385.16   14.90 
  -2  -6   2  385.36   14.90 
   1   6  -2   27.50    2.20 
   1   6  -2   22.90    2.00 
   1   6  -2   23.30    1.90 
   1   6  -2   26.70    2.20 
   1   6  -2   25.00    2.00 
   1   6  -2   25.30    2.10 
   1   6  -2   23.30    1.90 
   1   6  -2   25.60    1.80 
  -1  -6   2   22.50    1.50 
  -1  -6   2   26.50    1.60 
  -1  -6   2   26.20    1.50 
  -1  -6   2   25.30    1.80 
  -1  -6   2   26.90    2.00 
  -1  -6   2   27.00    2.00 
  -1  -6   2   26.20    2.00 
  -1  -6   2   26.90    2.10 
  -1  -6   2   27.40    2.10 
   0   6  -2    8.80    1.20 
   0   6  -2   11.30    1.40 
   0   6  -2    8.00    1.30 
   0   6  -2   12.00    1.60 
   0   6  -2   11.20    1.70 
   0   6  -2   10.50    1.50 
   0   6  -2   13.70    1.90 
   0   6  -2    9.40    1.60 
   0  -6   2   10.30    1.40 
   0  -6   2   12.50    1.50 
   0  -6   2   10.90    1.40 
   0  -6   2   11.00    1.10 
   0  -6   2   12.10    1.80 
   0  -6   2   11.60    1.60 
   0  -6   2   12.80    1.60 
   0  -6   2   10.30    1.50 
   0  -6   2   11.00    1.10 
  -1   6  -2   56.09    3.60 
  -1   6  -2   55.59    3.50 
  -1   6  -2   53.79    3.20 
  -1   6  -2   54.99    3.30 
  -1   6  -2   58.79    3.60 
  -1   6  -2   57.19    3.20 
  -1   6  -2   54.79    3.40 
  -1   6  -2   56.99    3.20 
   1  -6   2   56.69    3.60 
   1  -6   2   60.39    3.20 
   1  -6   2   63.69    3.50 
   1  -6   2   58.29    3.20 
   1  -6   2   57.29    3.30 
   1  -6   2   54.49    3.20 
  -2   6  -2  108.89    5.50 
  -2   6  -2  113.69    5.20 
  -2   6  -2  114.19    5.70 
  -2   6  -2  112.99    5.40 
  -2   6  -2  110.19    5.10 
  -2   6  -2  113.69    5.70 
   2  -6   2  114.79    5.40 
   2  -6   2  113.49    5.80 
   2  -6   2  117.99    5.20 
   2  -6   2  115.89    5.30 
   2  -6   2  115.19    5.40 
  -3   6  -2  198.08    8.80 
  -3   6  -2  222.78    8.90 
  -3   6  -2  219.38    8.60 
  -3   6  -2  208.98    9.10 
  -3   6  -2  201.88    9.00 
   3  -6   2  210.08    8.60 
   3  -6   2  229.08    8.80 
   3  -6   2  199.28    8.70 
   3  -6   2  209.18    8.60 
  -4   6  -2  102.69    5.00 
  -4   6  -2  102.99    4.80 
   4  -6   2  101.79    4.70 
   4  -6   2  103.69    5.10 
   4  -6   2  101.79    4.90 
  -5   6  -2    7.80    1.30 
  -5   6  -2    3.90    1.20 
   5  -6   2    6.10    1.00 
   5  -6   2    6.50    1.30 
   5  -6   2    6.00    1.20 
  10   5  -2   41.40    2.70 
  10   5  -2   51.59    2.90 
  10   5  -2   45.80    2.80 
   9   5  -2   80.39    4.60 
   9   5  -2   81.79    4.40 
   9   5  -2   82.79    4.60 
   9   5  -2   81.99    4.10 
   9   5  -2   84.19    4.10 
  -9  -5   2   75.69    3.40 
   8   5  -2  256.17   10.50 
   8   5  -2  240.08   10.50 
   8   5  -2  239.38    9.70 
   8   5  -2  250.27   10.30 
   8   5  -2  247.98   10.10 
   8   5  -2  247.78   10.00 
  -8  -5   2  235.38    9.20 
   7   5  -2  224.48    9.70 
   7   5  -2  245.58    9.90 
   7   5  -2  251.07   10.20 
   7   5  -2  244.88   10.40 
   7   5  -2  238.38   10.20 
   7   5  -2  235.38    9.50 
   7   5  -2  240.08    9.30 
   7   5  -2  238.18    9.80 
  -7  -5   2  235.68    8.90 
   6   5  -2  300.87   11.70 
   6   5  -2  297.67   12.20 
   6   5  -2  296.17   11.90 
   6   5  -2  294.17   11.80 
   6   5  -2  297.07   12.00 
   6   5  -2  291.67   11.20 
   6   5  -2  298.47   11.40 
   6   5  -2  295.77   11.70 
  -6  -5   2  298.87   10.90 
   5   5  -2   48.70    3.10 
   5   5  -2   47.90    2.80 
   5   5  -2   51.79    2.60 
   5   5  -2   51.89    3.40 
   5   5  -2   51.89    2.70 
   5   5  -2   54.69    3.10 
   5   5  -2   50.09    3.20 
   5   5  -2   51.29    3.10 
   5   5  -2   49.20    2.90 
   5   5  -2   49.99    2.90 
  -5  -5   2   49.40    2.50 
  -5  -5   2   53.19    2.40 
  -5  -5   2   50.39    3.00 
  -5  -5   2   49.50    2.40 
   4   5  -2  424.36   16.80 
   4   5  -2  449.26   16.70 
   4   5  -2  459.35   16.60 
   4   5  -2  429.06   16.50 
   4   5  -2  438.36   16.40 
   4   5  -2  427.36   16.50 
   4   5  -2  462.65   16.30 
   4   5  -2  451.05   16.20 
   4   5  -2  430.26   16.60 
  -4  -5   2  472.15   16.10 
  -4  -5   2  461.95   16.70 
  -4  -5   2  427.86   17.40 
  -4  -5   2  446.46   16.10 
  -4  -5   2  449.86   16.00 
   3   5  -2  819.82   30.30 
   3   5  -2  852.51   30.40 
   3   5  -2  898.11   30.60 
   3   5  -2  870.61   30.70 
   3   5  -2  847.22   30.40 
  -3  -5   2  847.82   30.10 
  -3  -5   2  864.31   30.20 
  -3  -5   2  865.51   30.20 
  -3  -5   2  860.41   30.70 
  -3  -5   2  794.22   30.30 
  -3  -5   2  845.82   31.70 
   2   5  -2  530.95   19.00 
   2   5  -2  521.95   19.00 
   2   5  -2  513.65   19.00 
   2   5  -2  533.75   19.30 
   2   5  -2  533.95   19.30 
  -2  -5   2  527.55   19.10 
  -2  -5   2  545.75   18.80 
  -2  -5   2  483.35   18.80 
  -2  -5   2  521.15   18.90 
  -2  -5   2  548.75   19.40 
  -2  -5   2  524.75   18.80 
  -2  -5   2  525.45   20.60 
   1   5  -2  517.15   18.80 
   1   5  -2  498.25   18.50 
   1   5  -2  508.95   18.60 
   1   5  -2  471.15   20.20 
   1   5  -2  507.05   18.50 
   1   5  -2  490.95   19.40 
   1   5  -2  518.55   18.80 
  -1  -5   2  535.15   18.80 
  -1  -5   2  522.75   18.20 
  -1  -5   2  507.55   18.40 
  -1  -5   2  485.75   18.30 
  -1  -5   2  537.65   18.30 
  -1  -5   2  533.55   18.70 
  -1  -5   2  509.35   20.20 
   0   5  -2   11.40    2.30 
   0   5  -2   19.50    1.70 
   0   5  -2   13.90    1.60 
   0   5  -2   17.80    2.20 
   0   5  -2   10.60    1.50 
   0  -5   2   13.50    1.30 
   0  -5   2   12.10    1.40 
   0  -5   2   12.40    1.40 
   0  -5   2   12.50    1.00 
   0  -5   2   11.90    1.10 
   0  -5   2   12.00    2.10 
  -1   5  -2  152.78    6.40 
  -1   5  -2  144.49    6.00 
  -1   5  -2  141.79    6.10 
  -1   5  -2  138.49    6.00 
  -1   5  -2  137.29    5.90 
  -1   5  -2  135.99    6.20 
  -1   5  -2  147.09    5.90 
  -1   5  -2  149.88    6.30 
  -1   5  -2  137.49    5.90 
   1  -5   2  137.79    5.90 
   1  -5   2  133.99    5.40 
   1  -5   2  141.39    6.00 
   1  -5   2  139.59    6.00 
   1  -5   2  156.38    6.20 
   1  -5   2  142.29    6.40 
   1  -5   2  135.19    7.60 
   1  -5   2  136.79    5.90 
   1  -5   2  153.78    5.90 
  -2   5  -2  502.75   19.00 
  -2   5  -2  553.94   19.70 
  -2   5  -2  510.65   18.80 
  -2   5  -2  522.75   19.40 
  -2   5  -2  514.25   19.30 
  -2   5  -2  495.55   19.00 
  -2   5  -2  480.85   19.30 
  -2   5  -2  557.14   19.60 
  -2   5  -2  509.25   19.20 
   2  -5   2  517.75   19.20 
   2  -5   2  520.55   19.20 
   2  -5   2  539.65   19.10 
   2  -5   2  487.95   19.50 
   2  -5   2  552.54   19.40 
  -3   5  -2 1436.46   55.59 
  -3   5  -2 1637.14   55.99 
  -3   5  -2 1548.05   55.79 
  -3   5  -2 1587.44   55.69 
  -3   5  -2 1576.74   55.39 
  -3   5  -2 1451.15   54.79 
  -3   5  -2 1621.84   55.99 
   3  -5   2 1563.34   55.49 
   3  -5   2 1570.94   55.59 
   3  -5   2 1572.74   55.49 
   3  -5   2 1624.74   55.99 
  -4   5  -2  160.98    6.50 
  -4   5  -2  157.98    6.80 
  -4   5  -2  150.48    7.00 
  -4   5  -2  135.09    6.70 
  -4   5  -2  139.49    6.80 
  -4   5  -2  145.79    5.80 
   4  -5   2  146.49    6.40 
   4  -5   2  147.19    6.40 
   4  -5   2  141.99    6.40 
   4  -5   2  150.28    6.80 
   4  -5   2  155.08    6.60 
  -5   5  -2  100.79    4.20 
  -5   5  -2  106.39    4.80 
  -5   5  -2   98.79    5.00 
   5  -5   2  103.09    4.90 
   5  -5   2  101.49    4.70 
   5  -5   2  101.69    5.20 
   5  -5   2  103.69    4.80 
  -6   5  -2    8.30    1.30 
  -6   5  -2   11.10    1.40 
  -6   5  -2    8.60    1.20 
   6  -5   2   11.20    1.40 
   6  -5   2    8.80    1.10 
   6  -5   2    7.80    1.40 
  10   4  -2   77.59    4.00 
  10   4  -2   82.29    3.90 
  10   4  -2   83.79    4.10 
   9   4  -2   55.39    3.70 
   9   4  -2   50.89    3.60 
   9   4  -2   43.30    2.90 
   9   4  -2   52.09    3.50 
   9   4  -2   50.09    3.00 
   8   4  -2   15.10    1.80 
   8   4  -2   15.50    1.70 
   8   4  -2   13.60    2.00 
   8   4  -2   15.30    1.90 
   8   4  -2   13.10    2.00 
   8   4  -2    9.70    1.50 
   8   4  -2   16.80    2.40 
   7   4  -2  321.87   12.90 
   7   4  -2  324.87   12.10 
   7   4  -2  311.87   12.30 
   7   4  -2  303.77   12.30 
   7   4  -2  316.07   12.80 
   7   4  -2  315.07   12.00 
   7   4  -2  315.37   12.70 
  -7  -4   2  297.87   13.30 
   6   4  -2  200.48    8.50 
   6   4  -2  204.48    8.70 
   6   4  -2  190.78    7.70 
   6   4  -2  186.68    8.10 
   6   4  -2  204.68    8.20 
   6   4  -2  201.38    8.40 
   6   4  -2  201.08    7.90 
   6   4  -2  200.38    8.20 
  -6  -4   2  188.28    8.60 
   5   4  -2  171.38    6.90 
   5   4  -2  163.28    7.10 
   5   4  -2  162.58    6.50 
   5   4  -2  166.28    7.30 
   5   4  -2  168.88    6.60 
   5   4  -2  170.58    6.70 
   5   4  -2  166.28    6.90 
   5   4  -2  159.18    7.10 
   5   4  -2  164.68    6.90 
  -5  -4   2  165.48    6.40 
  -5  -4   2  168.28    6.30 
  -5  -4   2  173.88    6.90 
   4   4  -2  236.08    8.90 
   4   4  -2  226.98    8.90 
  -4  -4   2  229.88    9.50 
  -4  -4   2  239.28    9.10 
  -4  -4   2  233.48    8.60 
  -4  -4   2  238.98    8.70 
   3   4  -2  188.98    7.50 
   3   4  -2  206.28    7.70 
   3   4  -2  200.08    7.50 
   3   4  -2  198.08    7.60 
   3   4  -2  196.58    7.50 
  -3  -4   2  186.98    7.20 
  -3  -4   2  181.18    7.40 
  -3  -4   2  204.18    7.80 
  -3  -4   2  199.48    7.30 
  -3  -4   2  203.18    8.40 
  -3  -4   2  200.88    7.30 
   2   4  -2  124.19    5.10 
   2   4  -2  121.19    5.10 
   2   4  -2  121.29    4.90 
   2   4  -2  120.39    4.90 
   2   4  -2  127.29    4.90 
   2   4  -2  124.49    4.90 
  -2  -4   2  118.69    4.90 
  -2  -4   2  119.69    5.00 
  -2  -4   2  126.79    4.80 
  -2  -4   2  119.19    4.80 
  -2  -4   2  127.19    5.20 
  -2  -4   2  117.89    4.70 
  -2  -4   2  130.49    6.00 
  -2  -4   2  126.69    4.70 
   1   4  -2   98.89    4.30 
   1   4  -2   93.99    4.10 
   1   4  -2   99.19    4.70 
   1   4  -2   99.49    4.20 
   1   4  -2   95.89    4.00 
   1   4  -2   99.29    4.10 
   1   4  -2   96.69    5.30 
   1   4  -2   94.39    4.10 
  -1  -4   2  100.09    4.20 
  -1  -4   2  102.79    3.90 
  -1  -4   2   99.19    5.10 
  -1  -4   2  101.39    3.90 
  -1  -4   2  109.39    4.40 
  -1  -4   2  101.79    4.30 
  -1  -4   2   94.79    4.00 
   0   4  -2 3705.23  129.79 
   0   4  -2 3711.53  128.19 
   0   4  -2 3547.45  128.09 
   0   4  -2 3579.74  128.79 
   0   4  -2 3642.24  128.09 
   0   4  -2 3501.65  127.99 
   0   4  -2 3742.43  128.29 
   0   4  -2 3623.94  128.09 
   0  -4   2 3684.03  128.39 
   0  -4   2 3951.80  128.29 
   0  -4   2 3755.02  128.19 
   0  -4   2 3769.12  127.79 
   0  -4   2 3770.52  127.99 
   0  -4   2 3552.94  128.19 
   0  -4   2 3641.44  129.49 
   0  -4   2 3549.04  127.79 
  -1   4  -2  950.00   32.00 
  -1   4  -2  889.71   31.80 
  -1   4  -2  907.91   31.80 
  -1   4  -2  875.21   32.70 
  -1   4  -2  882.41   32.00 
  -1   4  -2  898.71   31.70 
  -1   4  -2  817.32   31.40 
  -1   4  -2  942.11   32.00 
  -1   4  -2  870.71   33.60 
   1  -4   2  862.21   31.30 
   1  -4   2  872.01   31.70 
   1  -4   2  889.71   31.70 
   1  -4   2  936.51   31.80 
   1  -4   2  880.21   33.30 
   1  -4   2  833.52   31.30 
   1  -4   2  950.40   31.70 
  -2   4  -2  461.45   16.40 
  -2   4  -2  435.66   15.80 
  -2   4  -2  399.76   17.20 
  -2   4  -2  400.86   17.90 
  -2   4  -2  423.26   16.10 
  -2   4  -2  463.85   16.40 
  -2   4  -2  421.06   16.20 
  -2   4  -2  441.56   16.10 
   2  -4   2  405.46   16.00 
   2  -4   2  426.36   16.00 
   2  -4   2  453.55   16.10 
   2  -4   2  474.55   16.80 
   2  -4   2  429.56   16.00 
   2  -4   2  447.06   16.00 
  -3   4  -2  481.65   17.60 
  -3   4  -2  508.95   18.40 
  -3   4  -2  492.55   18.10 
  -3   4  -2  516.15   18.40 
  -3   4  -2  486.55   17.80 
  -3   4  -2  467.15   18.10 
  -3   4  -2  491.05   17.40 
  -3   4  -2  499.95   18.20 
   3  -4   2  472.15   17.90 
   3  -4   2  486.75   18.20 
   3  -4   2  483.25   17.90 
   3  -4   2  399.66   19.00 
   3  -4   2  456.15   17.90 
   3  -4   2  498.45   18.10 
   3  -4   2  495.55   17.90 
   3  -4   2  476.75   18.20 
   3  -4   2  511.25   18.00 
  -4   4  -2  611.34   22.60 
  -4   4  -2  589.74   22.10 
  -4   4  -2  612.64   22.80 
  -4   4  -2  605.44   22.30 
  -4   4  -2  638.34   23.00 
  -4   4  -2  643.94   22.00 
  -4   4  -2  630.34   22.90 
  -4   4  -2  585.14   22.70 
   4  -4   2  605.94   22.60 
   4  -4   2  596.64   22.90 
   4  -4   2  588.24   22.40 
   4  -4   2  612.94   22.90 
   4  -4   2  622.54   22.40 
   4  -4   2  613.74   22.50 
   4  -4   2  615.64   22.50 
  -5   4  -2  266.87   11.00 
  -5   4  -2  270.57   10.80 
  -5   4  -2  273.77   10.50 
  -5   4  -2  265.27   11.00 
  -5   4  -2  251.17   10.20 
  -5   4  -2  256.57   10.90 
  -5   4  -2  279.97   10.10 
   5  -4   2  271.77   10.70 
   5  -4   2  249.68   10.40 
   5  -4   2  276.87   10.60 
   5  -4   2  264.27   11.10 
   5  -4   2  258.17   10.60 
   5  -4   2  282.77   11.20 
  -6   4  -2   20.50    1.70 
  -6   4  -2   24.90    2.10 
  -6   4  -2   16.20    1.90 
   6  -4   2   18.70    2.00 
   6  -4   2   23.60    2.10 
   6  -4   2   22.90    2.20 
   6  -4   2   25.20    2.60 
  -7   4  -2   15.10    1.40 
  -7   4  -2   16.60    1.20 
  -7   4  -2   15.00    1.60 
  -7   4  -2   14.80    1.40 
   7  -4   2   12.20    1.20 
   7  -4   2   15.60    1.70 
  10   3  -2   30.90    2.50 
  10   3  -2   32.80    2.70 
   9   3  -2   31.40    2.80 
   9   3  -2   29.20    3.00 
   9   3  -2   28.10    2.70 
   9   3  -2   25.50    2.10 
   9   3  -2   26.00    2.40 
   8   3  -2  132.19    5.90 
   8   3  -2  128.79    6.10 
   8   3  -2  140.99    6.60 
   8   3  -2  134.69    6.70 
   8   3  -2  139.29    6.80 
   8   3  -2  136.89    6.10 
   7   3  -2   14.60    2.20 
   7   3  -2   14.60    1.80 
   7   3  -2   20.10    2.50 
   7   3  -2   19.40    1.80 
   7   3  -2   16.40    2.20 
   7   3  -2   19.10    1.90 
   7   3  -2   20.10    2.00 
  -7  -3   2   20.50    2.60 
   6   3  -2  462.15   17.20 
   6   3  -2  435.56   16.60 
   6   3  -2  441.86   16.80 
   6   3  -2  469.95   17.40 
   6   3  -2  456.35   17.30 
   6   3  -2  466.25   16.70 
   6   3  -2  437.06   16.70 
  -6  -3   2  426.76   17.20 
   5   3  -2  779.32   27.50 
   5   3  -2  828.42   29.20 
   5   3  -2  783.02   28.50 
  -5  -3   2  775.22   28.10 
  -5  -3   2  682.13   27.50 
   4   3  -2  866.51   30.90 
  -4  -3   2  842.02   31.00 
  -4  -3   2  889.11   30.70 
  -4  -3   2  892.01   31.10 
   3   3  -2 1193.68   44.00 
   3   3  -2 1229.08   44.00 
   3   3  -2 1225.38   44.10 
  -3  -3   2 1249.07   44.50 
  -3  -3   2 1167.48   44.00 
  -3  -3   2 1347.17   43.90 
  -3  -3   2 1267.57   44.00 
  -3  -3   2 1347.17   44.30 
   2   3  -2 1233.58   42.90 
   2   3  -2 1214.58   42.80 
   2   3  -2 1172.48   43.50 
   2   3  -2 1186.78   42.80 
   2   3  -2 1225.68   43.00 
  -2  -3   2 1250.57   43.10 
  -2  -3   2 1202.78   42.90 
  -2  -3   2 1301.87   43.60 
  -2  -3   2 1255.97   42.70 
  -2  -3   2 1166.38   42.90 
   1   3  -2 1763.52   64.39 
   1   3  -2 1823.62   64.29 
   1   3  -2 1886.81   64.29 
   1   3  -2 1862.41   65.39 
   1   3  -2 1861.71   64.39 
   1   3  -2 1858.01   64.19 
   1   3  -2 1926.11   64.89 
   1   3  -2 1830.52   64.49 
  -1  -3   2 1788.92   64.39 
  -1  -3   2 1895.71   64.59 
  -1  -3   2 1905.31   64.59 
  -1  -3   2 1664.23   64.29 
  -1  -3   2 1759.52   64.29 
  -1  -3   2 1930.51   64.19 
  -1  -3   2 1815.72   64.19 
  -1  -3   2 1810.02   64.19 
  -1  -3   2 1930.91   65.29 
   0   3  -2   64.19    2.90 
   0   3  -2   69.19    3.90 
   0   3  -2   68.89    2.60 
   0   3  -2   69.59    2.90 
   0   3  -2   70.69    3.30 
   0   3  -2   70.99    3.10 
   0   3  -2   65.39    2.90 
   0   3  -2   66.19    2.90 
   0   3  -2   69.89    3.10 
   0   3  -2   73.69    3.50 
   0  -3   2   67.19    2.90 
   0  -3   2   70.19    2.70 
   0  -3   2   73.09    3.00 
   0  -3   2   70.59    3.20 
   0  -3   2   72.99    2.90 
   0  -3   2   67.79    3.80 
   0  -3   2   65.29    2.70 
   0  -3   2   64.29    3.00 
   0  -3   2   68.89    3.00 
  -1   3  -2  949.40   33.70 
  -1   3  -2  969.20   33.60 
  -1   3  -2  963.30   34.30 
  -1   3  -2  929.71   33.60 
  -1   3  -2  895.31   33.40 
  -1   3  -2  956.00   33.80 
  -1   3  -2  949.01   33.70 
  -1   3  -2  994.50   35.10 
  -1   3  -2  964.20   33.50 
   1  -3   2  986.10   33.90 
   1  -3   2  892.31   33.20 
   1  -3   2  949.21   33.60 
   1  -3   2  932.21   33.80 
   1  -3   2  945.41   34.70 
   1  -3   2  948.61   33.50 
   1  -3   2  927.21   33.50 
   1  -3   2  961.90   33.20 
   1  -3   2  959.90   33.50 
  -2   3  -2  911.51   35.50 
  -2   3  -2 1039.10   35.90 
  -2   3  -2  996.80   37.40 
  -2   3  -2  967.80   35.70 
  -2   3  -2 1002.60   35.40 
  -2   3  -2 1000.40   36.60 
  -2   3  -2 1055.89   35.90 
  -2   3  -2  972.60   35.90 
  -2   3  -2 1034.80   35.80 
  -2   3  -2 1026.80   35.70 
  -2   3  -2 1014.60   35.80 
   2  -3   2 1046.50   36.20 
   2  -3   2 1020.50   35.70 
   2  -3   2 1029.60   35.70 
   2  -3   2 1014.80   35.60 
   2  -3   2  979.90   37.00 
  -3   3  -2  326.77   11.70 
  -3   3  -2  298.87   13.10 
  -3   3  -2  320.37   12.20 
  -3   3  -2  299.27   13.70 
  -3   3  -2  323.77   12.10 
  -3   3  -2  327.67   12.30 
  -3   3  -2  326.97   12.30 
  -3   3  -2  320.27   12.10 
   3  -3   2  327.17   12.10 
   3  -3   2  320.37   11.90 
   3  -3   2  320.77   12.00 
  -4   3  -2  122.19    5.60 
  -4   3  -2  114.89    4.80 
  -4   3  -2  117.79    5.40 
  -4   3  -2  122.29    5.50 
  -4   3  -2  129.19    5.70 
  -4   3  -2  114.89    5.10 
  -4   3  -2  119.59    5.00 
  -4   3  -2  120.79    5.60 
   4  -3   2  115.89    5.30 
   4  -3   2  122.29    5.40 
   4  -3   2  120.39    5.40 
   4  -3   2  127.39    5.80 
   4  -3   2  118.19    5.20 
   4  -3   2  120.19    5.70 
   4  -3   2  123.39    5.50 
   4  -3   2  125.09    5.20 
  -5   3  -2   39.30    2.40 
  -5   3  -2   34.60    2.90 
  -5   3  -2   36.40    3.00 
  -5   3  -2   36.30    2.90 
  -5   3  -2   34.90    2.40 
  -5   3  -2   35.60    2.80 
  -5   3  -2   36.30    2.20 
   5  -3   2   36.10    3.00 
   5  -3   2   30.80    3.00 
   5  -3   2   35.40    2.40 
   5  -3   2   34.40    2.50 
   5  -3   2   37.50    3.20 
   5  -3   2   29.00    2.90 
   5  -3   2   33.60    2.60 
   5  -3   2   34.30    2.50 
  -6   3  -2  101.69    4.80 
  -6   3  -2   98.59    5.30 
  -6   3  -2  101.79    5.30 
  -6   3  -2  107.29    4.50 
  -6   3  -2  107.69    5.20 
  -6   3  -2  104.89    4.60 
  -6   3  -2  105.79    5.40 
   6  -3   2  100.39    5.40 
   6  -3   2  111.49    5.00 
   6  -3   2  104.59    5.50 
   6  -3   2  108.69    5.60 
   6  -3   2   98.99    5.40 
   6  -3   2  107.49    5.10 
   6  -3   2   95.89    4.60 
  -7   3  -2  109.09    4.80 
  -7   3  -2  116.99    5.30 
  -7   3  -2  120.69    4.70 
  -7   3  -2  104.49    4.90 
   7  -3   2  107.39    5.50 
   7  -3   2  120.09    5.30 
   7  -3   2  113.99    5.60 
   7  -3   2  112.69    5.50 
   7  -3   2  120.69    5.10 
  -8   3  -2    9.90    1.20 
  -8   3  -2   11.50    1.00 
   8  -3   2   11.70    1.50 
   9   2  -2   35.90    2.90 
   9   2  -2   44.70    3.30 
   9   2  -2   39.10    2.90 
   9   2  -2   39.70    2.70 
   9   2  -2   39.60    3.00 
   8   2  -2   79.69    4.80 
   8   2  -2   79.09    4.70 
   8   2  -2   81.79    5.00 
   8   2  -2   80.89    4.70 
   8   2  -2   95.09    4.50 
   8   2  -2   80.29    4.10 
   7   2  -2   58.79    3.70 
   7   2  -2   57.39    3.20 
   7   2  -2   57.49    3.90 
   7   2  -2   51.49    3.10 
   7   2  -2   50.39    3.60 
   7   2  -2   52.79    3.20 
   7   2  -2   55.59    3.80 
   6   2  -2   49.40    3.20 
   6   2  -2   49.40    2.90 
   6   2  -2   47.20    3.20 
   6   2  -2   51.19    2.90 
   6   2  -2   49.30    3.00 
   6   2  -2   50.89    3.30 
   6   2  -2   52.99    3.60 
   6   2  -2   43.50    3.00 
  -6  -2   2   51.49    3.50 
  -6  -2   2   51.49    3.10 
   5   2  -2  268.47    9.90 
  -5  -2   2  251.07   10.30 
   4   2  -2  278.87   10.10 
  -4  -2   2  270.97    9.80 
  -4  -2   2  265.57   10.10 
   3   2  -2 1085.29   39.50 
  -3  -2   2 1131.49   39.50 
  -3  -2   2 1120.79   39.60 
  -3  -2   2 1109.39   39.40 
  -3  -2   2 1174.38   39.30 
   2   2  -2 1990.10   63.59 
   2   2  -2 1748.03   64.09 
  -2  -2   2 1712.73   63.39 
  -2  -2   2 1768.42   63.89 
  -2  -2   2 1913.01   64.99 
  -2  -2   2 1889.91   63.69 
  -2  -2   2 1854.41   63.39 
  -2  -2   2 1683.33   63.49 
   1   2  -2 1140.29   37.50 
   1   2  -2 1070.49   37.40 
   1   2  -2 1040.00   37.40 
   1   2  -2 1078.09   38.10 
  -1  -2   2 1024.80   37.40 
  -1  -2   2 1115.69   37.70 
  -1  -2   2 1038.70   37.60 
  -1  -2   2 1016.10   37.60 
  -1  -2   2 1097.59   38.00 
  -1  -2   2 1086.29   37.40 
   0   2  -2 9365.26  332.27 
   0   2  -2 9705.13  330.17 
   0   2  -2 9778.42  329.67 
   0   2  -2 9158.48  329.97 
   0   2  -2 9469.75  335.17 
   0   2  -2 9426.36  331.77 
   0  -2   2 9605.04  330.57 
   0  -2   2 8811.02  330.87 
   0  -2   2 8874.01  330.57 
   0  -2   2 9999.00  335.37 
   0  -2   2 9344.57  329.47 
   0  -2   2 9971.40  331.97 
  -1   2  -2 2047.00   70.39 
  -1   2  -2 1931.21   69.89 
  -1   2  -2 2068.79   70.09 
  -1   2  -2 2044.70   69.99 
  -1   2  -2 2037.40   70.99 
  -1   2  -2 1937.01   69.99 
  -1   2  -2 2048.40   70.09 
  -1   2  -2 2042.20   70.09 
  -1   2  -2 1937.51   70.19 
   1  -2   2 2083.49   70.09 
   1  -2   2 2001.40   69.69 
   1  -2   2 2016.40   70.19 
   1  -2   2 1933.01   69.99 
   1  -2   2 1889.91   69.89 
   1  -2   2 1912.21   69.89 
   1  -2   2 2117.69   70.29 
   1  -2   2 2018.20   70.79 
  -2   2  -2  561.24   19.70 
  -2   2  -2  560.54   20.30 
  -2   2  -2  534.95   19.20 
  -2   2  -2  539.45   19.90 
  -2   2  -2  553.14   19.80 
  -2   2  -2  528.75   19.80 
  -2   2  -2  578.14   21.00 
  -2   2  -2  509.55   19.50 
  -2   2  -2  557.44   19.60 
  -2   2  -2  566.64   19.70 
   2  -2   2  558.04   20.00 
   2  -2   2  568.84   20.70 
   2  -2   2  520.45   19.40 
   2  -2   2  565.74   19.90 
   2  -2   2  552.14   19.70 
   2  -2   2  541.95   19.60 
   2  -2   2  546.05   19.20 
   2  -2   2  543.45   19.50 
   2  -2   2  550.84   19.60 
  -3   2  -2  715.33   26.40 
  -3   2  -2  705.83   24.90 
  -3   2  -2  701.43   24.90 
  -3   2  -2  695.53   24.90 
  -3   2  -2  701.13   25.00 
  -3   2  -2  642.64   24.60 
  -3   2  -2  702.83   25.80 
  -3   2  -2  673.03   25.10 
  -3   2  -2  692.13   24.50 
  -3   2  -2  706.83   25.00 
   3  -2   2  716.93   25.40 
   3  -2   2  651.33   25.80 
   3  -2   2  697.83   24.70 
   3  -2   2  688.53   24.70 
   3  -2   2  694.83   24.90 
   3  -2   2  712.93   24.70 
  -4   2  -2  281.17   10.70 
  -4   2  -2  280.67   12.20 
  -4   2  -2  282.67   10.80 
  -4   2  -2  258.97   11.70 
  -4   2  -2  288.47   10.20 
  -4   2  -2  268.27   10.60 
  -4   2  -2  276.17   10.80 
   4  -2   2  285.77   10.50 
   4  -2   2  253.57   10.30 
   4  -2   2  275.77   10.70 
   4  -2   2  248.78   11.50 
   4  -2   2  279.27   10.40 
   4  -2   2  306.07   11.20 
  -5   2  -2   47.60    2.90 
  -5   2  -2   52.79    2.50 
  -5   2  -2   49.10    3.10 
  -5   2  -2   47.80    3.10 
  -5   2  -2   45.90    2.30 
  -5   2  -2   50.79    3.00 
  -5   2  -2   45.00    2.60 
   5  -2   2   48.10    2.80 
   5  -2   2   46.90    2.80 
   5  -2   2   44.80    2.70 
   5  -2   2   50.19    2.90 
   5  -2   2   48.80    2.60 
   5  -2   2   46.40    3.30 
   5  -2   2   46.40    2.80 
   5  -2   2   48.30    3.00 
   5  -2   2   47.70    3.30 
   5  -2   2   42.00    3.30 
   5  -2   2   49.20    3.10 
  -6   2  -2  299.17   11.90 
  -6   2  -2  280.37   11.50 
  -6   2  -2  288.67   11.20 
  -6   2  -2  287.57   11.70 
  -6   2  -2  293.17   10.90 
  -6   2  -2  298.57   11.10 
  -6   2  -2  288.97   11.90 
   6  -2   2  266.87   11.10 
   6  -2   2  296.87   12.00 
   6  -2   2  275.17   11.30 
   6  -2   2  298.17   11.50 
   6  -2   2  315.07   12.10 
   6  -2   2  288.97   11.90 
   6  -2   2  291.17   11.40 
   6  -2   2  295.97   12.10 
   6  -2   2  304.47   12.00 
  -7   2  -2    1.80    1.30 
  -7   2  -2    0.00    1.10 
  -7   2  -2    0.70    0.90 
  -7   2  -2   -0.50    0.80 
  -7   2  -2   -0.80    1.10 
  -7   2  -2   -0.20    1.10 
  -7   2  -2    0.60    0.90 
   7  -2   2    0.30    1.30 
   7  -2   2    0.30    1.40 
   7  -2   2    0.50    1.60 
   7  -2   2   -0.80    1.00 
   7  -2   2   -0.40    0.90 
   7  -2   2    0.80    1.10 
   7  -2   2    1.80    1.10 
   7  -2   2   -0.20    1.60 
  -8   2  -2   44.10    2.20 
  -8   2  -2   38.90    2.50 
  -8   2  -2   38.30    2.30 
   8  -2   2   34.40    2.80 
   8  -2   2   40.90    3.10 
   8  -2   2   44.90    2.50 
   8  -2   2   36.60    2.90 
   9   1  -2  125.79    5.70 
   9   1  -2  122.69    5.90 
   9   1  -2  130.19    5.40 
   9   1  -2  116.79    5.60 
   8   1  -2  404.26   15.30 
   8   1  -2  416.16   15.90 
   8   1  -2  412.36   16.10 
   8   1  -2  409.76   15.80 
   8   1  -2  373.16   15.20 
  -8  -1   2  404.36   16.10 
   7   1  -2   98.39    5.10 
   7   1  -2   96.59    4.60 
   7   1  -2   89.99    5.00 
   7   1  -2  100.49    5.40 
   7   1  -2   93.99    4.70 
   7   1  -2  100.69    5.30 
   7   1  -2   99.69    5.50 
   6   1  -2  175.28    7.80 
   6   1  -2  176.08    7.70 
   6   1  -2  177.58    8.00 
   6   1  -2  172.08    7.60 
   6   1  -2  181.08    7.40 
   6   1  -2  182.88    7.30 
   6   1  -2  176.48    7.90 
  -6  -1   2  174.48    7.60 
   5   1  -2  633.44   21.60 
  -5  -1   2  586.74   23.10 
  -5  -1   2  581.44   21.80 
  -5  -1   2  584.84   22.20 
   4   1  -2  448.86   15.90 
  -4  -1   2  446.26   16.20 
  -4  -1   2  425.86   15.50 
  -4  -1   2  438.76   17.10 
   3   1  -2  631.34   22.50 
  -3  -1   2  637.74   22.70 
   2   1  -2 2113.19   72.09 
  -2  -1   2 1974.50   72.59 
  -2  -1   2 2117.29   72.69 
   1   1  -2 7599.04  269.77 
   1   1  -2 7957.90  268.77 
  -1  -1   2 7716.03  270.57 
  -1  -1   2 7639.04  268.77 
  -1  -1   2 8216.48  269.87 
  -1  -1   2 6948.40  268.67 
  -1  -1   2 7826.52  318.07 
   0   1  -2   95.19    3.50 
   0   1  -2   91.99    3.40 
   0   1  -2   85.69    3.70 
   0   1  -2   91.39    3.60 
   0   1  -2   97.89    4.00 
   0   1  -2   95.59    3.50 
   0  -1   2   93.39    3.90 
   0  -1   2   87.69    3.40 
   0  -1   2   92.29    3.70 
   0  -1   2   90.19    3.60 
   0  -1   2   93.49    3.60 
   0  -1   2   86.19    3.50 
   0  -1   2   87.89    4.00 
  -1   1  -2 1174.08   44.10 
  -1   1  -2 1268.87   44.40 
  -1   1  -2 1316.17   44.40 
  -1   1  -2 1354.16   44.20 
  -1   1  -2 1319.77   44.30 
  -1   1  -2 1295.77   44.90 
  -1   1  -2 1249.88   44.10 
   1  -1   2 1256.07   44.20 
   1  -1   2 1328.87   44.30 
   1  -1   2 1198.38   44.30 
   1  -1   2 1277.17   44.70 
   1  -1   2 1177.58   44.10 
   1  -1   2 1201.98   44.00 
  -2   1  -2 1194.58   43.20 
  -2   1  -2 1156.88   43.00 
  -2   1  -2 1309.17   44.00 
  -2   1  -2 1249.28   43.50 
  -2   1  -2 1257.57   43.10 
  -2   1  -2 1236.28   43.00 
  -2   1  -2 1217.28   43.10 
   2  -1   2 1236.28   43.70 
   2  -1   2 1159.48   43.00 
   2  -1   2 1184.38   43.20 
   2  -1   2 1244.28   43.10 
   2  -1   2 1211.08   42.60 
   2  -1   2 1272.47   43.20 
  -3   1  -2  423.16   15.70 
  -3   1  -2  389.76   14.70 
  -3   1  -2  436.76   16.00 
  -3   1  -2  400.16   15.00 
  -3   1  -2  423.26   15.10 
  -3   1  -2  412.86   14.90 
  -3   1  -2  426.46   14.90 
   3  -1   2  411.66   14.70 
   3  -1   2  390.86   15.50 
   3  -1   2  416.66   14.90 
   3  -1   2  396.86   14.70 
   3  -1   2  419.06   15.20 
   3  -1   2  407.56   14.90 
   3  -1   2  380.16   14.70 
  -4   1  -2    4.70    1.00 
  -4   1  -2    4.90    0.90 
  -4   1  -2    6.00    1.10 
  -4   1  -2    5.40    1.40 
  -4   1  -2    3.80    0.70 
  -4   1  -2    4.40    1.30 
  -4   1  -2    4.40    1.00 
  -4   1  -2    5.30    1.10 
   4  -1   2    4.50    0.90 
   4  -1   2    4.00    0.80 
   4  -1   2    3.80    1.00 
   4  -1   2    4.00    0.80 
  -5   1  -2  238.28    9.00 
  -5   1  -2  204.68    8.40 
  -5   1  -2  228.88    8.90 
  -5   1  -2  206.58    9.90 
  -5   1  -2  212.78    8.90 
  -5   1  -2  214.28    8.80 
  -5   1  -2  228.68    8.20 
   5  -1   2  226.28    8.70 
   5  -1   2  218.28    8.60 
   5  -1   2  234.98    8.60 
   5  -1   2  212.78    8.60 
   5  -1   2  214.48    8.50 
   5  -1   2  211.08    9.00 
   5  -1   2  200.68    8.60 
   5  -1   2  221.98    8.90 
   5  -1   2  211.28    8.90 
   5  -1   2  223.18    9.10 
  -6   1  -2   62.29    3.70 
  -6   1  -2   61.99    3.20 
  -6   1  -2   64.89    2.90 
  -6   1  -2   67.89    3.80 
  -6   1  -2   66.49    3.80 
  -6   1  -2   67.29    3.10 
   6  -1   2   57.69    3.30 
   6  -1   2   61.39    3.90 
   6  -1   2   59.49    3.90 
   6  -1   2   62.69    3.40 
   6  -1   2   63.09    3.80 
   6  -1   2   58.19    3.30 
   6  -1   2   56.79    3.10 
   6  -1   2   61.79    3.40 
   6  -1   2   66.59    4.10 
   6  -1   2   62.19    3.80 
  -7   1  -2  284.27   10.70 
  -7   1  -2  264.07   11.20 
  -7   1  -2  296.87   11.80 
  -7   1  -2  299.67   10.90 
  -7   1  -2  288.17   11.80 
   7  -1   2  289.17   11.80 
   7  -1   2  271.07   11.20 
   7  -1   2  273.07   11.20 
   7  -1   2  300.17   12.00 
   7  -1   2  293.57   12.00 
   7  -1   2  275.87   11.90 
   7  -1   2  287.67   11.40 
   7  -1   2  290.07   11.80 
   7  -1   2  300.07   11.30 
  -8   1  -2  272.27   10.40 
  -8   1  -2  282.67   10.30 
   8  -1   2  282.27   11.30 
   8  -1   2  260.27   11.20 
   8  -1   2  250.27   10.60 
   8  -1   2  277.47   11.40 
   8  -1   2  286.47   10.80 
   8  -1   2  284.27   11.40 
  -9   1  -2    9.80    1.30 
  -9   1  -2    8.40    0.90 
   9  -1   2    6.30    1.10 
   9  -1   2    8.60    1.60 
   9  -1   2    9.00    1.40 
   9  -1   2    5.10    1.20 
   9   0  -2  164.48    7.10 
   9   0  -2  170.98    7.20 
   9   0  -2  169.98    7.30 
   9   0  -2  182.08    6.90 
   8   0  -2    9.30    2.00 
   8   0  -2   10.90    2.10 
   8   0  -2    7.90    1.80 
   8   0  -2   10.60    1.80 
   8   0  -2   10.80    1.70 
  -8   0   2   10.20    1.10 
   7   0  -2  224.88    9.80 
   7   0  -2  232.88    9.80 
   7   0  -2  227.68    9.30 
   7   0  -2  218.78    9.80 
   7   0  -2  243.78    9.50 
   7   0  -2  234.08   10.20 
   7   0  -2  250.27   10.20 
  -7   0   2  222.08    9.60 
   6   0  -2   18.50    2.40 
   6   0  -2   16.00    1.60 
   6   0  -2   16.50    1.90 
   6   0  -2   15.10    2.10 
   6   0  -2   20.40    1.90 
   6   0  -2   18.80    2.30 
   6   0  -2   14.50    1.90 
   6   0  -2   16.10    2.00 
   5   0  -2   19.70    1.70 
   5   0  -2   19.50    1.80 
   5   0  -2   20.20    2.00 
   5   0  -2   18.70    1.90 
   5   0  -2   20.00    2.90 
   5   0  -2   19.10    1.60 
   5   0  -2   22.50    2.40 
   5   0  -2   21.90    2.20 
  -5   0   2   21.20    1.90 
   4   0  -2    9.50    1.00 
  -4   0   2    8.90    1.70 
  -4   0   2    9.80    1.20 
  -4   0   2    9.10    1.20 
  -4   0   2    8.20    1.20 
   3   0  -2  220.48    8.20 
   3   0  -2  224.48    8.30 
  -3   0   2  230.78    9.10 
  -3   0   2  213.48    7.90 
  -3   0   2  222.78    8.30 
   2   0  -2 1132.39   39.40 
   2   0  -2 1125.79   39.60 
  -2   0   2 1159.58   40.10 
  -2   0   2 1159.78   39.50 
  -2   0   2 1052.79   39.50 
   1   0  -2 1717.53   58.69 
   1   0  -2 1689.83   58.49 
  -1   0   2 1666.53   59.49 
  -1   0   2 1657.73   59.29 
  -1   0   2 1647.14   59.19 
   0   0  -2 7979.40  281.47 
   0   0  -2 8046.90  332.27 
   0   0  -2 7466.65  282.37 
   0   0  -2 8256.77  281.67 
   0   0  -2 8501.55  281.17 
   0   0   2 7952.00  282.07 
   0   0   2 8123.49  289.67 
   0   0   2 8144.89  281.67 
   0   0   2 8273.47  282.77 
   0   0   2 8017.40  281.57 
   0   0   2 7663.33  283.37 
   0   0   2 8355.66  330.37 
  -1   0  -2  649.24   21.40 
  -1   0  -2  589.04   21.60 
  -1   0  -2  601.44   21.60 
  -1   0  -2  630.04   22.00 
  -1   0  -2  588.44   21.60 
   1   0   2  628.84   21.90 
   1   0   2  624.44   21.60 
   1   0   2  584.74   21.60 
   1   0   2  614.24   21.60 
   1   0   2  606.34   21.40 
  -2   0  -2 6063.49  211.88 
  -2   0  -2 5922.81  212.38 
   2   0   2 5618.94  210.68 
   2   0   2 5832.12  212.38 
   2   0   2 6432.76  211.98 
   2   0   2 6235.08  211.88 
   2   0   2 6124.99  214.38 
  -3   0  -2   52.49    2.90 
  -3   0  -2   52.59    2.40 
  -3   0  -2   45.40    2.20 
  -3   0  -2   49.99    2.50 
  -3   0  -2   54.79    3.10 
   3   0   2   52.39    2.40 
   3   0   2   50.09    2.30 
   3   0   2   50.99    2.30 
   3   0   2   50.99    2.80 
   3   0   2   46.10    2.70 
   3   0   2   50.69    2.50 
  -4   0  -2  323.77   11.90 
  -4   0  -2  321.57   11.60 
  -4   0  -2  306.07   11.40 
  -4   0  -2  319.97   12.50 
  -4   0  -2  306.87   12.40 
   4   0   2  319.87   11.50 
   4   0   2  305.47   11.30 
   4   0   2  281.17   11.10 
   4   0   2  303.87   11.50 
   4   0   2  309.27   11.80 
  -5   0  -2  175.28    7.50 
  -5   0  -2  170.08    8.20 
  -5   0  -2  178.28    7.30 
  -5   0  -2  186.68    7.40 
  -5   0  -2  178.18    6.70 
  -5   0  -2  178.58    8.40 
  -5   0  -2  172.78    7.00 
   5   0   2  191.78    7.30 
   5   0   2  185.98    7.10 
  -6   0  -2  523.05   19.20 
  -6   0  -2  504.15   18.60 
  -6   0  -2  491.45   19.00 
  -6   0  -2  498.05   19.30 
  -6   0  -2  522.35   18.30 
   6   0   2  508.75   18.80 
   6   0   2  476.65   19.20 
   6   0   2  514.85   19.10 
   6   0   2  540.95   18.70 
   6   0   2  483.55   18.70 
   6   0   2  500.95   19.10 
   6   0   2  514.15   19.30 
   6   0   2  528.95   18.90 
   6   0   2  532.95   19.40 
   6   0   2  487.35   18.70 
   6   0   2  497.55   18.70 
  -7   0  -2  144.29    6.60 
  -7   0  -2  142.59    5.80 
  -7   0  -2  136.79    5.60 
  -7   0  -2  143.49    6.60 
   7   0   2  136.69    6.80 
   7   0   2  144.29    6.20 
   7   0   2  139.19    7.60 
   7   0   2  134.49    6.20 
   7   0   2  152.38    6.90 
   7   0   2  138.19    6.20 
   7   0   2  135.99    6.60 
   7   0   2  140.59    6.80 
   7   0   2  138.99    6.60 
  -8   0  -2  230.98   10.00 
  -8   0  -2  237.58   10.00 
  -8   0  -2  241.78    9.10 
  -8   0  -2  230.08    8.90 
   8   0   2  246.48   10.30 
   8   0   2  240.28    9.50 
   8   0   2  240.98    9.60 
   8   0   2  214.28    9.40 
   8   0   2  238.68   10.20 
   8   0   2  241.98   10.10 
   8   0   2  234.98    9.90 
   8   0   2  243.48   10.30 
  -9   0  -2   12.70    1.40 
  -9   0  -2   13.30    1.30 
   9   0   2   17.40    1.80 
   9   0   2   12.10    1.70 
   9   0   2   18.10    2.30 
   9   0   2   12.40    1.80 
   9   0   2    8.10    1.60 
   8  -1  -2   95.09    5.10 
   8  -1  -2   95.19    4.50 
   8  -1  -2   83.09    4.60 
   8  -1  -2   96.99    5.00 
   8  -1  -2   94.19    4.80 
  -8   1   2   89.99    3.80 
   7  -1  -2   16.80    2.50 
   7  -1  -2   19.80    2.40 
   7  -1  -2   19.70    2.50 
   7  -1  -2   20.60    2.10 
   7  -1  -2   16.10    1.90 
   7  -1  -2   23.00    2.50 
  -7   1   2   21.40    1.50 
   6  -1  -2    5.40    1.40 
   6  -1  -2    3.70    1.70 
   6  -1  -2    3.50    1.60 
   6  -1  -2    5.20    1.20 
   6  -1  -2    3.90    1.40 
   6  -1  -2    4.80    1.40 
   6  -1  -2    5.80    1.60 
   6  -1  -2    4.60    1.20 
  -6   1   2    3.70    1.30 
  -6   1   2    5.30    1.40 
  -6   1   2    4.00    0.70 
   5  -1  -2   67.09    3.60 
   5  -1  -2   69.79    3.90 
   5  -1  -2   66.09    4.10 
   5  -1  -2   72.49    4.10 
   5  -1  -2   73.49    3.60 
   5  -1  -2   67.09    3.40 
   5  -1  -2   66.39    3.90 
   5  -1  -2   66.39    3.60 
  -5   1   2   67.09    3.50 
  -5   1   2   70.69    3.70 
  -5   1   2   71.39    3.70 
  -5   1   2   70.59    3.70 
   4  -1  -2  637.04   21.90 
  -4   1   2  573.64   21.90 
  -4   1   2  592.74   23.30 
  -4   1   2  627.64   22.20 
   3  -1  -2   17.10    1.20 
   3  -1  -2   16.40    1.20 
  -3   1   2   15.80    1.40 
  -3   1   2   14.90    1.20 
  -3   1   2   17.20    1.40 
  -3   1   2   18.20    2.00 
   2  -1  -2  366.56   13.40 
   2  -1  -2  391.06   13.50 
   2  -1  -2  351.76   13.40 
   2  -1  -2  368.66   13.40 
  -2   1   2  367.36   13.60 
  -2   1   2  393.86   13.50 
  -2   1   2  394.56   14.10 
  -2   1   2  352.56   13.20 
  -2   1   2  348.87   13.30 
  -2   1   2  393.86   13.70 
   1  -1  -2 4060.09  139.59 
   1  -1  -2 4156.08  140.89 
   1  -1  -2 3919.71  141.49 
   1  -1  -2 3761.32  140.59 
  -1   1   2 3708.73  139.19 
  -1   1   2 3934.41  140.19 
  -1   1   2 4196.08  140.59 
  -1   1   2 3885.71  140.69 
  -1   1   2 4184.58  142.89 
  -1   1   2 4201.68  142.29 
   0  -1  -2   29.60    1.50 
   0  -1  -2   26.20    1.10 
   0  -1  -2   27.40    1.10 
   0  -1  -2   26.50    1.30 
   0  -1  -2   24.50    1.40 
   0  -1  -2   23.70    1.30 
   0   1   2   27.20    1.50 
   0   1   2   26.80    1.20 
   0   1   2   32.40    1.60 
   0   1   2   25.10    1.50 
  -1  -1  -2  784.72   28.10 
  -1  -1  -2  822.82   28.40 
  -1  -1  -2  804.62   28.00 
  -1  -1  -2  807.22   27.90 
   1   1   2  798.32   28.00 
   1   1   2  800.32   28.00 
   1   1   2  739.03   28.40 
   1   1   2  782.62   28.00 
   1   1   2  850.51   28.40 
  -2  -1  -2 1423.56   49.30 
  -2  -1  -2 1360.06   48.90 
  -2  -1  -2 1353.26   48.90 
  -2  -1  -2 1408.86   48.80 
  -2  -1  -2 1378.76   48.70 
   2   1   2 1403.26   49.00 
   2   1   2 1485.65   49.20 
   2   1   2 1395.26   49.20 
   2   1   2 1349.47   48.80 
  -3  -1  -2 3501.25  128.39 
  -3  -1  -2 3662.03  129.99 
  -3  -1  -2 3561.94  130.49 
  -3  -1  -2 3575.54  128.19 
  -3  -1  -2 3893.21  129.49 
   3   1   2 3658.93  129.79 
   3   1   2 3598.14  127.99 
   3   1   2 3682.53  130.79 
   3   1   2 3968.50  129.59 
  -4  -1  -2  619.44   22.70 
  -4  -1  -2  659.53   23.20 
  -4  -1  -2  643.64   22.90 
   4   1   2  634.14   22.90 
   4   1   2  623.14   22.70 
   4   1   2  635.24   22.90 
   4   1   2  606.84   22.60 
   4   1   2  664.93   22.60 
  -5  -1  -2  239.88    9.50 
  -5  -1  -2  227.68    9.80 
  -5  -1  -2  235.28    8.90 
  -5  -1  -2  233.88    9.10 
  -5  -1  -2  224.48    8.40 
   5   1   2  237.38    8.90 
   5   1   2  220.18    8.80 
   5   1   2  238.48    8.80 
  -6  -1  -2  303.77   11.50 
  -6  -1  -2  303.97   12.20 
  -6  -1  -2  289.27   12.50 
  -6  -1  -2  304.37   11.00 
  -6  -1  -2  302.87   11.80 
   6   1   2  295.77   11.80 
   6   1   2  299.87   12.00 
   6   1   2  304.87   11.50 
   6   1   2  335.47   11.50 
   6   1   2  302.77   12.00 
   6   1   2  300.57   11.50 
   6   1   2  293.47   11.40 
   6   1   2  294.97   12.00 
   6   1   2  300.77   11.60 
   6   1   2  307.17   11.50 
   6   1   2  296.07   11.50 
   6   1   2  289.87   11.70 
  -7  -1  -2  137.19    6.90 
  -7  -1  -2  139.99    6.10 
  -7  -1  -2  148.79    5.70 
   7   1   2  138.19    6.20 
   7   1   2  149.99    6.20 
   7   1   2  146.29    6.20 
   7   1   2  148.49    6.30 
   7   1   2  133.99    6.00 
   7   1   2  145.49    6.80 
   7   1   2  139.69    6.80 
   7   1   2  128.69    6.40 
   7   1   2  148.19    6.70 
   7   1   2  149.39    6.80 
  -8  -1  -2   11.60    1.20 
  -8  -1  -2   10.50    1.30 
  -8  -1  -2   13.40    2.20 
   8   1   2   11.30    2.00 
   8   1   2   13.00    2.30 
   8   1   2   11.70    2.30 
   8   1   2   10.60    1.50 
   8   1   2    8.90    1.40 
   8   1   2    8.20    1.90 
   8   1   2   12.90    2.10 
   8   1   2   13.70    1.80 
   8   1   2   10.90    1.70 
  -9  -1  -2   64.99    3.10 
  -9  -1  -2   62.59    3.20 
   9   1   2   68.69    4.10 
   9   1   2   64.29    4.30 
   9   1   2   68.89    4.20 
   9   1   2   68.89    3.80 
   9   1   2   71.99    4.40 
 -10  -1  -2   43.50    2.00 
  10   1   2   38.10    2.60 
  10   1   2   39.10    2.40 
  10   1   2   42.50    2.70 
  10   1   2   36.90    2.60 
   8  -2  -2  134.69    6.10 
   8  -2  -2  135.69    5.90 
   8  -2  -2  132.99    5.80 
   8  -2  -2  145.29    6.10 
   8  -2  -2  134.89    5.60 
  -8   2   2  132.99    5.20 
   7  -2  -2   74.89    4.60 
   7  -2  -2   62.29    3.90 
   7  -2  -2   74.99    4.00 
   7  -2  -2   78.59    4.40 
   7  -2  -2   77.59    4.50 
   7  -2  -2   77.89    4.70 
  -7   2   2   70.19    3.30 
  -7   2   2   73.69    3.20 
   6  -2  -2  143.79    6.50 
   6  -2  -2  126.59    6.60 
   6  -2  -2  127.09    6.10 
   6  -2  -2  135.19    6.80 
   6  -2  -2  137.89    6.60 
   6  -2  -2  134.39    6.10 
   6  -2  -2  128.39    6.00 
  -6   2   2  128.29    6.10 
  -6   2   2  129.59    6.30 
  -6   2   2  133.79    5.30 
   5  -2  -2   79.69    4.60 
   5  -2  -2   81.39    4.50 
   5  -2  -2   73.79    3.80 
   5  -2  -2   67.79    3.90 
   5  -2  -2   74.59    4.40 
   5  -2  -2   74.09    4.10 
   5  -2  -2   74.49    4.00 
   5  -2  -2   79.49    3.90 
   5  -2  -2   75.69    4.20 
  -5   2   2   76.39    4.10 
  -5   2   2   76.99    4.10 
  -5   2   2   75.19    3.20 
   4  -2  -2  311.17   12.30 
   4  -2  -2  328.77   12.10 
   4  -2  -2  320.77   12.60 
   4  -2  -2  320.57   12.30 
   4  -2  -2  322.07   12.50 
   4  -2  -2  301.07   12.30 
   4  -2  -2  319.07   12.60 
   4  -2  -2  310.77   12.00 
   4  -2  -2  325.57   12.20 
  -4   2   2  307.47   12.10 
  -4   2   2  328.37   12.30 
  -4   2   2  323.97   12.20 
  -4   2   2  323.77   12.30 
  -4   2   2  319.37   11.50 
   3  -2  -2  191.98    7.20 
   3  -2  -2  170.28    7.10 
   3  -2  -2  176.88    7.10 
  -3   2   2  194.48    7.40 
  -3   2   2  172.98    7.10 
  -3   2   2  190.58    8.30 
  -3   2   2  191.78    7.30 
  -3   2   2  187.18    7.80 
  -3   2   2  186.98    7.30 
   2  -2  -2  660.23   22.70 
   2  -2  -2  682.53   22.70 
   2  -2  -2  613.94   22.70 
   2  -2  -2  572.04   22.40 
   2  -2  -2  634.54   22.80 
   2  -2  -2  627.64   22.70 
  -2   2   2  664.43   22.80 
  -2   2   2  657.93   23.70 
  -2   2   2  623.94   22.80 
  -2   2   2  590.84   22.70 
  -2   2   2  658.83   23.40 
  -2   2   2  665.73   22.90 
   1  -2  -2  197.68    7.20 
   1  -2  -2  202.18    7.60 
   1  -2  -2  198.78    7.50 
   1  -2  -2  202.48    7.50 
   1  -2  -2  203.58    8.00 
   1  -2  -2  213.78    7.70 
   1  -2  -2  196.68    7.60 
   1  -2  -2  211.08    7.30 
  -1   2   2  212.58    8.20 
  -1   2   2  198.78    7.60 
  -1   2   2  208.08    8.20 
  -1   2   2  205.38    7.60 
   0  -2  -2 2300.37   82.99 
   0  -2  -2 2401.46   82.59 
   0  -2  -2 2346.97   82.19 
   0   2   2 2328.57   82.09 
   0   2   2 2240.08   82.09 
   0   2   2 2470.55   83.99 
   0   2   2 2387.06   84.19 
  -1  -2  -2 1883.91   64.69 
  -1  -2  -2 1748.63   64.79 
  -1  -2  -2 1808.62   64.79 
  -1  -2  -2 1938.51   66.59 
   1   2   2 1766.72   65.19 
   1   2   2 1915.31   65.89 
   1   2   2 1804.62   64.49 
   1   2   2 1922.51   65.89 
   1   2   2 1861.21   64.79 
  -2  -2  -2  487.55   17.20 
  -2  -2  -2  472.45   17.10 
  -2  -2  -2  506.65   17.70 
  -2  -2  -2  469.05   17.30 
  -2  -2  -2  481.55   16.90 
   2   2   2  487.75   17.10 
   2   2   2  504.45   17.70 
   2   2   2  467.45   17.00 
   2   2   2  480.45   17.10 
   2   2   2  459.65   16.90 
  -3  -2  -2  627.54   22.60 
  -3  -2  -2  628.44   22.00 
  -3  -2  -2  627.34   22.50 
  -3  -2  -2  608.44   22.10 
  -3  -2  -2  664.33   23.00 
   3   2   2  637.04   22.40 
   3   2   2  648.94   22.20 
   3   2   2  632.34   22.90 
   3   2   2  603.74   22.20 
   3   2   2  622.04   22.30 
  -4  -2  -2  245.68    9.30 
  -4  -2  -2  237.28    8.90 
  -4  -2  -2  231.58    8.70 
   4   2   2  217.08    8.90 
   4   2   2  221.58    8.50 
   4   2   2  218.58    8.40 
   4   2   2  225.68    8.60 
   4   2   2  218.68    8.30 
   4   2   2  224.68    8.40 
  -5  -2  -2  200.88    8.00 
  -5  -2  -2  185.98    8.20 
  -5  -2  -2  196.38    7.70 
   5   2   2  194.68    7.60 
   5   2   2  184.38    7.30 
   5   2   2  198.88    7.30 
   5   2   2  169.28    7.20 
  -6  -2  -2  127.79    6.40 
  -6  -2  -2  142.89    6.40 
  -6  -2  -2  132.99    5.90 
  -6  -2  -2  134.09    5.10 
  -6  -2  -2  136.09    5.60 
   6   2   2  126.59    5.90 
   6   2   2  129.09    6.00 
   6   2   2  139.29    6.80 
   6   2   2  129.49    5.90 
   6   2   2  129.29    5.60 
   6   2   2  132.29    5.50 
   6   2   2  123.99    5.60 
   6   2   2  129.79    6.20 
   6   2   2  141.49    5.60 
  -7  -2  -2   22.20    2.50 
  -7  -2  -2   22.60    1.50 
  -7  -2  -2   21.00    2.00 
  -7  -2  -2   20.10    2.10 
   7   2   2   21.50    1.90 
   7   2   2   20.90    2.00 
   7   2   2   22.50    2.50 
   7   2   2   23.20    2.40 
   7   2   2   18.80    1.90 
   7   2   2   21.80    2.40 
   7   2   2   20.00    1.90 
   7   2   2   24.80    1.90 
   7   2   2   23.50    2.50 
  -8  -2  -2   47.80    3.10 
  -8  -2  -2   48.30    2.60 
  -8  -2  -2   50.09    3.80 
   8   2   2   46.00    3.70 
   8   2   2   43.20    3.00 
   8   2   2   53.59    3.20 
   8   2   2   45.20    2.90 
   8   2   2   50.89    3.90 
   8   2   2   47.00    3.40 
   8   2   2   52.49    3.30 
   8   2   2   55.39    3.80 
   8   2   2   46.40    3.00 
  -9  -2  -2   47.60    2.60 
  -9  -2  -2   48.70    2.50 
  -9  -2  -2   51.69    3.50 
   9   2   2   55.69    3.40 
   9   2   2   50.29    3.60 
   9   2   2   44.50    3.70 
   9   2   2   49.90    3.80 
   9   2   2   46.10    2.90 
   9   2   2   49.80    3.70 
   9   2   2   45.90    3.10 
 -10  -2  -2   40.20    2.00 
  10   2   2   38.90    2.90 
  10   2   2   38.10    2.80 
  10   2   2   39.80    2.90 
  10   2   2   42.00    2.70 
   7  -3  -2    6.10    1.60 
   7  -3  -2    9.70    1.40 
   7  -3  -2    9.60    1.70 
   7  -3  -2    9.70    1.80 
   7  -3  -2    8.30    1.50 
  -7   3   2   10.50    1.00 
  -7   3   2    6.10    0.90 
   6  -3  -2  196.78    8.80 
   6  -3  -2  181.88    8.10 
   6  -3  -2  198.88    8.50 
   6  -3  -2  202.78    8.70 
   6  -3  -2  199.58    8.00 
   6  -3  -2  189.78    8.30 
   6  -3  -2  183.78    7.90 
  -6   3   2  195.98    7.50 
  -6   3   2  190.98    8.40 
  -6   3   2  180.88    7.20 
  -6   3   2  172.88    8.10 
   5  -3  -2  103.89    5.10 
   5  -3  -2   99.79    5.70 
   5  -3  -2  104.09    4.90 
   5  -3  -2  109.89    5.70 
   5  -3  -2  105.19    5.30 
   5  -3  -2  106.19    5.30 
   5  -3  -2  110.29    5.40 
   5  -3  -2  112.29    5.70 
  -5   3   2  106.09    5.30 
  -5   3   2   99.69    4.30 
  -5   3   2  104.49    5.40 
  -5   3   2  101.79    4.40 
  -5   3   2  102.59    5.10 
   4  -3  -2   51.79    3.10 
   4  -3  -2   51.99    3.20 
   4  -3  -2   45.90    3.30 
   4  -3  -2   50.39    3.20 
   4  -3  -2   51.39    3.50 
   4  -3  -2   49.60    3.00 
   4  -3  -2   50.89    3.00 
   4  -3  -2   53.29    3.40 
  -4   3   2   49.99    2.50 
  -4   3   2   52.39    3.10 
  -4   3   2   55.19    3.30 
  -4   3   2   52.89    3.20 
  -4   3   2   48.60    3.00 
   3  -3  -2   27.40    3.00 
   3  -3  -2   29.80    2.20 
   3  -3  -2   24.20    2.10 
   3  -3  -2   28.80    2.30 
   3  -3  -2   26.50    2.00 
   3  -3  -2   26.20    2.30 
   3  -3  -2   30.60    2.00 
   3  -3  -2   29.30    2.10 
  -3   3   2   28.40    2.10 
  -3   3   2   26.30    2.00 
  -3   3   2   27.40    2.70 
  -3   3   2   30.20    1.50 
  -3   3   2   28.20    2.60 
  -3   3   2   29.60    2.20 
  -3   3   2   26.20    2.20 
  -3   3   2   28.80    2.00 
   2  -3  -2  634.14   22.60 
   2  -3  -2  630.64   22.50 
   2  -3  -2  616.34   22.50 
   2  -3  -2  583.84   22.10 
   2  -3  -2  613.34   22.50 
  -2   3   2  624.84   22.10 
  -2   3   2  665.83   22.80 
  -2   3   2  620.74   23.60 
  -2   3   2  584.84   22.50 
  -2   3   2  655.43   22.70 
  -2   3   2  630.54   23.70 
  -2   3   2  618.04   22.60 
  -2   3   2  668.33   22.70 
   1  -3  -2 3602.44  121.59 
   1  -3  -2 3392.76  120.69 
   1  -3  -2 3289.27  121.69 
   1  -3  -2 3633.84  121.09 
   1  -3  -2 3415.26  120.89 
   1  -3  -2 3592.54  121.09 
   1  -3  -2 3348.06  120.99 
  -1   3   2 3603.04  121.09 
  -1   3   2 3475.35  121.89 
  -1   3   2 3543.45  120.99 
  -1   3   2 3442.26  121.09 
  -1   3   2 3382.56  120.99 
  -1   3   2 3585.34  122.09 
  -1   3   2 3240.48  120.89 
   0  -3  -2   21.10    1.10 
   0  -3  -2   20.10    1.10 
   0  -3  -2   21.80    1.80 
   0  -3  -2   19.50    0.80 
   0  -3  -2   21.00    1.30 
   0  -3  -2   19.20    1.20 
   0  -3  -2   19.20    1.30 
   0   3   2   20.10    1.40 
   0   3   2   19.30    1.20 
   0   3   2   20.90    1.90 
   0   3   2   19.70    1.40 
   0   3   2   20.70    1.40 
   0   3   2   23.60    2.00 
   0   3   2   20.60    1.30 
  -1  -3  -2  131.69    5.20 
  -1  -3  -2  132.59    5.00 
  -1  -3  -2  131.59    5.80 
  -1  -3  -2  138.89    5.00 
  -1  -3  -2  126.29    5.00 
   1   3   2  138.69    5.20 
   1   3   2  143.29    5.10 
   1   3   2  137.79    6.00 
   1   3   2  126.09    5.20 
   1   3   2  132.89    5.20 
   1   3   2  144.89    5.80 
  -2  -3  -2   44.20    2.10 
  -2  -3  -2   43.70    2.10 
  -2  -3  -2   45.10    1.80 
  -2  -3  -2   45.80    2.70 
   2   3   2   42.80    1.80 
   2   3   2   46.10    2.10 
   2   3   2   44.40    2.00 
   2   3   2   41.40    2.00 
   2   3   2   47.30    2.60 
   2   3   2   39.50    1.80 
   2   3   2   43.70    2.00 
   2   3   2   44.50    2.70 
  -3  -3  -2 1840.22   65.19 
  -3  -3  -2 1957.00   65.39 
  -3  -3  -2 1918.91   64.89 
  -3  -3  -2 1956.10   66.09 
   3   3   2 1832.22   65.09 
   3   3   2 1792.22   65.19 
   3   3   2 1783.12   64.89 
   3   3   2 1854.51   65.19 
   3   3   2 1899.41   65.99 
   3   3   2 1858.61   65.09 
   3   3   2 1890.01   65.19 
   3   3   2 1779.82   65.29 
  -4  -3  -2  718.43   26.60 
  -4  -3  -2  788.12   27.70 
  -4  -3  -2  797.82   27.10 
  -4  -3  -2  720.83   26.40 
  -4  -3  -2  788.42   27.30 
   4   3   2  768.22   26.90 
   4   3   2  771.32   26.70 
   4   3   2  751.32   26.70 
   4   3   2  724.73   27.40 
   4   3   2  712.43   26.70 
   4   3   2  754.32   26.90 
  -5  -3  -2  542.65   20.30 
  -5  -3  -2  592.04   21.50 
  -5  -3  -2  584.04   21.70 
  -5  -3  -2  580.44   21.10 
   5   3   2  548.05   20.70 
   5   3   2  584.54   21.00 
   5   3   2  597.84   20.70 
   5   3   2  580.84   20.60 
  -6  -3  -2  741.93   27.20 
  -6  -3  -2  812.02   28.60 
  -6  -3  -2  788.12   28.20 
  -6  -3  -2  764.32   28.70 
   6   3   2  763.02   27.70 
   6   3   2  745.83   27.80 
   6   3   2  793.72   27.70 
   6   3   2  735.53   27.70 
   6   3   2  731.03   28.10 
   6   3   2  840.12   28.60 
   6   3   2  798.52   28.10 
   6   3   2  767.02   27.70 
   6   3   2  741.03   27.70 
  -7  -3  -2   46.10    3.50 
  -7  -3  -2   39.90    2.90 
  -7  -3  -2   43.80    2.80 
  -7  -3  -2   42.80    2.20 
   7   3   2   36.60    2.80 
   7   3   2   46.70    2.80 
   7   3   2   43.40    2.50 
   7   3   2   38.00    2.90 
   7   3   2   42.70    3.30 
   7   3   2   42.30    2.70 
   7   3   2   41.10    3.20 
   7   3   2   45.00    2.70 
   7   3   2   39.20    2.30 
  -8  -3  -2  134.39    6.20 
  -8  -3  -2  127.89    6.90 
  -8  -3  -2  142.79    5.50 
   8   3   2  136.69    6.80 
   8   3   2  134.19    6.10 
   8   3   2  137.49    6.50 
   8   3   2  127.69    6.50 
   8   3   2  133.29    6.00 
   8   3   2  133.99    6.10 
   8   3   2  138.09    6.20 
   8   3   2  144.09    6.80 
  -9  -3  -2   34.00    2.00 
  -9  -3  -2   33.20    2.10 
  -9  -3  -2   31.60    2.50 
   9   3   2   33.60    2.70 
   9   3   2   38.20    3.20 
   9   3   2   35.50    2.90 
   9   3   2   30.90    3.30 
   9   3   2   35.80    2.70 
   9   3   2   32.00    3.10 
   9   3   2   35.50    3.30 
   9   3   2   33.90    2.50 
 -10  -3  -2   14.30    1.30 
 -10  -3  -2   13.80    1.40 
  10   3   2   15.00    1.60 
  10   3   2   14.70    1.90 
  10   3   2   10.80    1.70 
  10   3   2   11.60    1.60 
  10   3   2   12.70    1.80 
   7  -4  -2  103.79    4.80 
  -7   4   2  105.49    4.10 
   6  -4  -2   28.30    2.80 
   6  -4  -2   34.20    3.00 
   6  -4  -2   36.10    2.50 
   6  -4  -2   33.70    3.00 
   6  -4  -2   33.80    2.70 
   6  -4  -2   29.70    2.40 
  -6   4   2   34.70    2.00 
  -6   4   2   32.90    2.00 
   5  -4  -2  865.31   31.10 
   5  -4  -2  858.91   30.70 
   5  -4  -2  871.81   30.90 
   5  -4  -2  839.02   31.40 
   5  -4  -2  866.31   31.10 
   5  -4  -2  804.72   30.60 
   5  -4  -2  795.62   31.00 
  -5   4   2  862.21   31.20 
  -5   4   2  805.62   30.80 
  -5   4   2  852.41   30.70 
  -5   4   2  870.31   30.00 
  -5   4   2  844.82   30.20 
   4  -4  -2  670.03   26.30 
   4  -4  -2  685.43   25.80 
   4  -4  -2  732.83   26.30 
   4  -4  -2  724.23   25.90 
   4  -4  -2  700.93   26.60 
   4  -4  -2  702.43   26.10 
   4  -4  -2  729.53   26.20 
   4  -4  -2  713.53   26.40 
  -4   4   2  741.43   26.40 
  -4   4   2  708.23   26.20 
  -4   4   2  698.13   25.20 
  -4   4   2  687.83   25.50 
  -4   4   2  731.43   25.40 
  -4   4   2  688.13   26.10 
   3  -4  -2  238.08    9.90 
   3  -4  -2  245.78    9.80 
   3  -4  -2  243.18   10.10 
   3  -4  -2  259.77    9.90 
   3  -4  -2  235.48    9.50 
   3  -4  -2  252.67    9.70 
   3  -4  -2  241.68    9.60 
   3  -4  -2  244.08   10.00 
   3  -4  -2  230.78    9.70 
   3  -4  -2  235.28    9.50 
  -3   4   2  240.28    9.70 
  -3   4   2  232.78    9.80 
  -3   4   2  233.08    9.60 
  -3   4   2  253.97   10.00 
  -3   4   2  243.68    9.30 
  -3   4   2  253.27    9.10 
  -3   4   2  249.08    9.90 
  -3   4   2  233.28    9.00 
   2  -4  -2   45.30    2.80 
   2  -4  -2   46.10    2.60 
   2  -4  -2   44.60    2.60 
   2  -4  -2   44.50    2.40 
  -2   4   2   44.10    2.60 
  -2   4   2   43.90    2.70 
  -2   4   2   43.70    3.50 
  -2   4   2   40.90    2.40 
  -2   4   2   44.60    3.60 
  -2   4   2   44.20    2.80 
  -2   4   2   48.90    2.20 
  -2   4   2   44.20    2.70 
   1  -4  -2  235.88    9.00 
   1  -4  -2  236.48    8.50 
   1  -4  -2  234.78    9.00 
   1  -4  -2  238.88    8.80 
   1  -4  -2  229.68    8.50 
   1  -4  -2  231.68    8.90 
  -1   4   2  236.98   10.30 
  -1   4   2  228.88    8.80 
  -1   4   2  222.38   10.00 
  -1   4   2  222.88    8.90 
  -1   4   2  248.28    9.10 
  -1   4   2  244.28    9.10 
  -1   4   2  233.98    8.60 
  -1   4   2  236.28    9.10 
  -1   4   2  214.18    8.80 
   0  -4  -2  873.31   30.20 
   0  -4  -2  846.52   31.40 
   0  -4  -2  841.32   30.00 
   0  -4  -2  822.32   30.30 
   0  -4  -2  867.81   30.40 
   0  -4  -2  871.81   30.00 
   0   4   2  849.72   30.40 
   0   4   2  851.41   30.60 
   0   4   2  821.92   30.30 
   0   4   2  856.91   31.30 
   0   4   2  884.61   30.40 
   0   4   2  890.71   30.40 
   0   4   2  813.22   30.30 
   0   4   2  853.01   31.70 
   0   4   2  848.32   30.20 
  -1  -4  -2  359.16   13.30 
  -1  -4  -2  366.16   13.40 
  -1  -4  -2  367.36   13.20 
  -1  -4  -2  372.26   13.20 
  -1  -4  -2  378.76   13.60 
  -1  -4  -2  383.26   14.50 
   1   4   2  364.96   13.50 
   1   4   2  345.57   13.60 
   1   4   2  388.26   13.60 
   1   4   2  361.06   13.50 
   1   4   2  379.46   14.30 
   1   4   2  376.16   14.70 
   1   4   2  360.36   13.40 
   1   4   2  379.86   13.50 
   1   4   2  364.76   13.40 
  -2  -4  -2  572.94   19.50 
  -2  -4  -2  581.14   20.80 
  -2  -4  -2  522.15   19.60 
  -2  -4  -2  566.24   19.90 
  -2  -4  -2  548.55   19.50 
   2   4   2  581.34   20.90 
   2   4   2  566.64   19.80 
   2   4   2  542.25   19.70 
   2   4   2  519.45   19.80 
   2   4   2  554.64   19.70 
   2   4   2  549.35   19.70 
   2   4   2  582.34   20.50 
   2   4   2  489.55   19.40 
   2   4   2  536.65   19.70 
   2   4   2  543.85   19.60 
  -3  -4  -2  182.38    6.80 
  -3  -4  -2  181.48    7.70 
  -3  -4  -2  173.48    6.80 
  -3  -4  -2  177.08    6.40 
  -3  -4  -2  172.38    6.40 
   3   4   2  180.68    6.70 
   3   4   2  166.58    6.60 
   3   4   2  180.58    6.70 
   3   4   2  170.98    6.70 
   3   4   2  167.28    7.60 
   3   4   2  175.18    6.70 
   3   4   2  171.18    6.50 
   3   4   2  157.48    6.70 
   3   4   2  178.08    6.80 
  -4  -4  -2  142.89    5.50 
  -4  -4  -2  153.28    6.10 
  -4  -4  -2  146.39    5.40 
  -4  -4  -2  152.48    5.80 
  -4  -4  -2  152.38    6.80 
   4   4   2  147.59    5.70 
   4   4   2  132.79    6.60 
   4   4   2  148.99    5.90 
   4   4   2  151.98    5.80 
   4   4   2  144.39    6.00 
   4   4   2  144.29    5.70 
  -5  -4  -2  252.37   10.20 
  -5  -4  -2  242.78   10.50 
  -5  -4  -2  246.78    9.80 
  -5  -4  -2  235.38    9.10 
   5   4   2  247.48    9.70 
   5   4   2  257.97    9.40 
   5   4   2  255.67    9.60 
   5   4   2  254.57    9.30 
  -6  -4  -2  335.57   11.90 
  -6  -4  -2  347.07   13.30 
  -6  -4  -2  344.27   12.90 
   6   4   2  336.67   12.30 
   6   4   2  331.57   12.70 
   6   4   2  325.37   12.50 
   6   4   2  325.67   12.80 
   6   4   2  314.97   12.10 
   6   4   2  317.57   12.60 
   6   4   2  325.77   12.30 
   6   4   2  332.67   12.20 
   6   4   2  323.57   12.40 
   6   4   2  310.37   12.80 
   6   4   2  318.57   12.40 
  -7  -4  -2  998.50   34.10 
  -7  -4  -2  991.30   35.80 
  -7  -4  -2  911.01   35.20 
   7   4   2  965.60   35.20 
   7   4   2  961.70   34.30 
   7   4   2  988.10   35.30 
   7   4   2  952.30   35.00 
   7   4   2  996.40   34.60 
   7   4   2  930.21   34.60 
   7   4   2  954.20   34.70 
   7   4   2  964.40   34.80 
   7   4   2  954.50   34.60 
  -8  -4  -2  252.47   10.00 
  -8  -4  -2  246.78    9.20 
  -8  -4  -2  240.78   10.90 
   8   4   2  246.58    9.70 
   8   4   2  252.87   10.50 
   8   4   2  244.98    9.90 
   8   4   2  245.38    9.40 
   8   4   2  228.58    9.70 
   8   4   2  241.98   10.20 
   8   4   2  253.47    9.80 
   8   4   2  244.58   10.50 
   8   4   2  240.68   10.00 
   8   4   2  220.88    9.90 
  -9  -4  -2  261.57    9.90 
  -9  -4  -2  248.08   10.50 
  -9  -4  -2  270.07   10.00 
   9   4   2  264.37   10.90 
   9   4   2  273.77   10.70 
   9   4   2  273.97   11.30 
   9   4   2  276.67   11.30 
   9   4   2  279.77   10.60 
   9   4   2  247.78   10.40 
   9   4   2  242.48   10.60 
 -10  -4  -2    7.40    0.90 
 -10  -4  -2    9.00    1.10 
  10   4   2    8.30    1.70 
  10   4   2    7.10    1.70 
  10   4   2    7.90    1.40 
  10   4   2    5.10    1.40 
  10   4   2    6.60    1.60 
  11   4   2    6.70    1.60 
   6  -5  -2   16.40    1.80 
  -6   5   2   15.50    1.20 
  -6   5   2   16.40    1.70 
   5  -5  -2  240.38   10.00 
   5  -5  -2  230.08    9.50 
   5  -5  -2  257.47    9.70 
   5  -5  -2  244.18    9.90 
   5  -5  -2  250.37   10.30 
  -5   5   2  251.27    9.10 
  -5   5   2  238.48    9.30 
  -5   5   2  235.18    9.30 
   4  -5  -2   73.29    3.90 
   4  -5  -2   81.39    4.10 
   4  -5  -2   75.79    4.30 
   4  -5  -2   80.29    4.80 
   4  -5  -2   75.59    4.40 
   4  -5  -2   75.29    4.30 
   4  -5  -2   78.09    4.60 
  -4   5   2   78.19    4.10 
  -4   5   2   75.09    4.50 
  -4   5   2   65.79    4.20 
  -4   5   2   74.99    3.70 
  -4   5   2   74.49    3.60 
  -4   5   2   77.89    3.50 
   3  -5  -2  509.75   19.10 
   3  -5  -2  504.55   19.30 
   3  -5  -2  499.65   18.90 
   3  -5  -2  518.65   19.20 
   3  -5  -2  514.45   19.70 
   3  -5  -2  504.35   19.00 
   3  -5  -2  509.05   18.90 
   3  -5  -2  520.15   19.30 
  -3   5   2  516.05   18.40 
  -3   5   2  519.05   19.00 
  -3   5   2  504.65   19.30 
  -3   5   2  495.25   19.20 
  -3   5   2  522.45   18.50 
  -3   5   2  490.85   18.70 
  -3   5   2  519.85   19.50 
  -3   5   2  490.85   18.70 
   2  -5  -2   26.90    2.10 
   2  -5  -2   24.50    2.10 
   2  -5  -2   25.10    2.40 
   2  -5  -2   29.20    2.10 
   2  -5  -2   27.50    2.20 
   2  -5  -2   24.90    2.10 
   2  -5  -2   24.40    2.20 
   2  -5  -2   27.90    2.50 
   2  -5  -2   24.90    2.30 
  -2   5   2   27.70    2.40 
  -2   5   2   27.80    2.10 
  -2   5   2   28.10    2.50 
  -2   5   2   27.10    2.40 
  -2   5   2   25.80    2.50 
  -2   5   2   26.60    2.00 
  -2   5   2   26.70    1.70 
  -2   5   2   23.60    2.10 
  -2   5   2   31.30    1.90 
  -2   5   2   25.10    1.90 
   1  -5  -2  411.36   14.60 
   1  -5  -2  402.06   15.20 
   1  -5  -2  396.56   15.10 
   1  -5  -2  408.56   15.20 
   1  -5  -2  420.76   15.00 
   1  -5  -2  400.66   14.60 
   1  -5  -2  414.26   15.20 
   1  -5  -2  391.96   15.30 
   1  -5  -2  398.96   15.20 
   1  -5  -2  391.86   15.20 
  -1   5   2  379.66   14.80 
  -1   5   2  405.66   17.10 
  -1   5   2  432.06   15.40 
  -1   5   2  417.26   14.70 
  -1   5   2  378.66   14.90 
  -1   5   2  412.06   15.60 
  -1   5   2  429.06   15.40 
  -1   5   2  382.16   15.10 
  -1   5   2  405.06   14.60 
  -1   5   2  414.26   15.00 
  -1   5   2  408.76   15.20 
  -1   5   2  408.86   15.30 
   0  -5  -2   81.39    5.10 
   0  -5  -2   90.29    4.10 
   0  -5  -2   88.39    3.60 
   0  -5  -2   93.19    4.10 
   0  -5  -2   92.19    3.70 
   0  -5  -2   90.99    3.90 
   0   5   2   86.19    4.00 
   0   5   2   93.99    4.00 
   0   5   2   88.19    4.40 
   0   5   2   95.99    4.20 
   0   5   2   91.49    4.20 
   0   5   2   82.89    3.60 
   0   5   2   95.39    4.30 
   0   5   2   91.59    5.50 
   0   5   2   89.29    4.20 
   0   5   2   87.49    5.10 
  -1  -5  -2 1123.99   39.30 
  -1  -5  -2 1108.19   39.00 
  -1  -5  -2 1097.49   39.10 
  -1  -5  -2 1136.39   39.50 
  -1  -5  -2 1109.19   38.90 
  -1  -5  -2 1101.99   40.80 
   1   5   2 1120.59   39.20 
   1   5   2 1120.69   39.40 
   1   5   2 1084.09   40.90 
   1   5   2 1131.79   39.40 
   1   5   2 1087.79   40.40 
   1   5   2 1046.30   39.50 
   1   5   2 1151.18   39.40 
   1   5   2 1073.29   39.30 
   1   5   2 1134.79   39.40 
  -2  -5  -2  205.28    8.00 
  -2  -5  -2  219.38    9.60 
  -2  -5  -2  222.18    8.00 
  -2  -5  -2  225.78    8.00 
  -2  -5  -2  210.28    8.20 
  -2  -5  -2  229.28    8.50 
   2   5   2  215.68    9.70 
   2   5   2  218.68    9.30 
   2   5   2  217.08    8.30 
   2   5   2  217.38    8.40 
   2   5   2  221.68    8.40 
   2   5   2  219.68    8.40 
   2   5   2  219.08    8.20 
   2   5   2  212.88    8.40 
   2   5   2  210.48    8.50 
  -3  -5  -2  185.68    7.10 
  -3  -5  -2  180.68    6.60 
  -3  -5  -2  180.78    6.60 
  -3  -5  -2  180.28    8.20 
  -3  -5  -2  170.08    6.90 
  -3  -5  -2  160.08    6.70 
  -3  -5  -2  168.98    6.70 
   3   5   2  174.88    6.70 
   3   5   2  176.88    7.00 
   3   5   2  175.88    7.00 
   3   5   2  178.58    7.00 
   3   5   2  170.88    7.00 
   3   5   2  178.08    7.00 
   3   5   2  189.48    7.00 
   3   5   2  176.58    8.10 
  -4  -5  -2   67.69    2.90 
  -4  -5  -2   70.89    3.30 
  -4  -5  -2   69.09    3.10 
  -4  -5  -2   69.59    2.80 
  -4  -5  -2   70.99    3.40 
  -4  -5  -2   67.29    4.20 
   4   5   2   72.29    3.30 
   4   5   2   69.89    3.30 
   4   5   2   65.99    3.00 
   4   5   2   70.09    3.20 
   4   5   2   66.59    3.30 
   4   5   2   68.39    3.30 
  -5  -5  -2 1146.09   40.30 
  -5  -5  -2 1149.19   40.80 
  -5  -5  -2 1138.09   41.20 
  -5  -5  -2 1182.78   40.50 
  -5  -5  -2 1125.69   40.30 
  -5  -5  -2 1121.09   42.10 
   5   5   2 1157.18   40.90 
   5   5   2 1148.39   41.00 
   5   5   2 1149.29   40.70 
   5   5   2 1162.98   40.60 
  -6  -5  -2   58.29    4.30 
  -6  -5  -2   67.49    3.90 
  -6  -5  -2   66.29    3.30 
  -6  -5  -2   65.29    3.50 
  -6  -5  -2   56.09    2.70 
   6   5   2   51.39    3.30 
   6   5   2   54.69    3.20 
   6   5   2   59.19    3.00 
   6   5   2   56.79    3.20 
   6   5   2   49.99    3.00 
   6   5   2   55.99    3.10 
   6   5   2   58.49    3.20 
   6   5   2   55.29    3.20 
   6   5   2   57.69    2.80 
   6   5   2   58.89    2.90 
   6   5   2   55.09    3.20 
   6   5   2   57.59    3.20 
   6   5   2   59.49    3.50 
   6   5   2   53.19    2.80 
  -7  -5  -2  150.18    5.80 
  -7  -5  -2  149.19    7.30 
  -7  -5  -2  128.49    6.80 
   7   5   2  147.49    6.80 
   7   5   2  147.59    6.40 
   7   5   2  148.09    6.20 
   7   5   2  145.09    6.00 
   7   5   2  147.59    6.30 
   7   5   2  155.48    6.50 
   7   5   2  140.19    6.50 
   7   5   2  136.89    6.30 
   7   5   2  152.28    6.90 
   7   5   2  140.69    6.60 
   7   5   2  138.39    6.10 
  -8  -5  -2  340.77   13.00 
  -8  -5  -2  332.37   12.30 
  -8  -5  -2  311.97   12.10 
  -8  -5  -2  320.17   14.00 
   8   5   2  327.47   13.50 
   8   5   2  314.57   12.60 
   8   5   2  331.57   13.50 
   8   5   2  335.57   13.00 
   8   5   2  337.07   13.00 
   8   5   2  336.07   12.90 
   8   5   2  339.07   12.80 
   8   5   2  333.47   12.50 
   8   5   2  326.77   13.20 
  -9  -5  -2   98.59    4.90 
  -9  -5  -2   92.99    4.10 
  -9  -5  -2  101.29    4.30 
   9   5   2   94.19    4.40 
   9   5   2   91.89    5.00 
   9   5   2   95.79    4.90 
   9   5   2   90.39    4.70 
   9   5   2   90.39    4.60 
   9   5   2   94.99    5.40 
   9   5   2  102.19    5.50 
   9   5   2   95.39    4.80 
 -10  -5  -2   75.19    3.60 
 -10  -5  -2   77.69    3.50 
  10   5   2   79.39    4.00 
  10   5   2   82.09    4.60 
  10   5   2   84.89    4.20 
  10   5   2   75.59    4.20 
  10   5   2   79.39    4.60 
 -11  -5  -2    6.10    0.80 
  11   5   2    4.80    1.20 
  11   5   2    5.60    1.60 
   5  -6  -2  124.99    5.30 
   5  -6  -2  124.59    5.80 
  -5   6   2  127.09    4.90 
  -5   6   2  137.59    5.60 
  -5   6   2  117.69    5.10 
   4  -6  -2  144.49    6.60 
   4  -6  -2  133.39    5.80 
   4  -6  -2  146.29    6.20 
   4  -6  -2  121.69    6.00 
   4  -6  -2  130.99    6.00 
  -4   6   2  135.69    5.30 
  -4   6   2  118.69    5.40 
  -4   6   2  129.99    5.60 
   3  -6  -2  237.48    9.30 
   3  -6  -2  224.88    9.50 
   3  -6  -2  210.38    9.50 
   3  -6  -2  247.78    9.70 
   3  -6  -2  237.68   10.10 
   3  -6  -2  236.08    9.40 
   3  -6  -2  224.68    9.50 
  -3   6   2  226.98   10.10 
  -3   6   2  229.08    9.20 
  -3   6   2  232.08    9.80 
  -3   6   2  233.38    9.30 
  -3   6   2  224.88    8.90 
  -3   6   2  247.78    9.20 
  -3   6   2  226.28    8.70 
  -3   6   2  220.98    9.60 
   2  -6  -2  256.67   10.40 
   2  -6  -2  263.27   10.60 
   2  -6  -2  269.17   11.10 
   2  -6  -2  268.67   10.70 
   2  -6  -2  255.17   10.60 
  -2   6   2  274.97   10.90 
  -2   6   2  258.87   11.10 
  -2   6   2  265.57    9.80 
  -2   6   2  249.88   10.70 
  -2   6   2  262.77   10.00 
  -2   6   2  268.67   10.40 
  -2   6   2  260.87   10.70 
  -2   6   2  249.08   10.20 
  -2   6   2  262.77   10.20 
   1  -6  -2   75.29    4.10 
   1  -6  -2   79.59    4.00 
   1  -6  -2   74.89    3.70 
   1  -6  -2   70.69    3.30 
   1  -6  -2   73.49    4.00 
   1  -6  -2   77.29    4.00 
   1  -6  -2   70.49    3.80 
  -1   6   2   68.79    3.60 
  -1   6   2   70.59    4.00 
  -1   6   2   72.39    3.40 
  -1   6   2   73.89    3.80 
  -1   6   2   73.49    3.90 
  -1   6   2   73.69    3.30 
  -1   6   2   78.19    4.20 
  -1   6   2   81.89    3.80 
  -1   6   2   69.79    4.30 
  -1   6   2   77.79    4.30 
   0  -6  -2  499.85   19.20 
   0  -6  -2  544.55   19.50 
   0  -6  -2  516.05   19.40 
   0  -6  -2  547.75   19.20 
   0  -6  -2  492.15   18.80 
   0  -6  -2  540.15   19.60 
   0  -6  -2  521.45   18.90 
   0  -6  -2  518.85   19.70 
   0   6   2  500.45   19.30 
   0   6   2  518.35   19.60 
   0   6   2  549.15   19.60 
   0   6   2  486.75   19.20 
   0   6   2  541.75   19.20 
   0   6   2  523.95   19.30 
   0   6   2  510.05   18.70 
   0   6   2  517.75   19.10 
   0   6   2  567.14   19.70 
   0   6   2  521.95   19.70 
   0   6   2  547.25   19.60 
  -1  -6  -2  477.85   18.10 
  -1  -6  -2  494.25   17.70 
  -1  -6  -2  525.65   17.80 
  -1  -6  -2  508.15   18.40 
  -1  -6  -2  499.65   17.90 
  -1  -6  -2  453.35   19.80 
  -1  -6  -2  518.65   18.20 
  -1  -6  -2  470.35   18.40 
  -1  -6  -2  472.15   18.20 
   1   6   2  514.65   18.30 
   1   6   2  467.35   18.10 
   1   6   2  489.85   18.10 
   1   6   2  512.75   18.30 
   1   6   2  487.55   20.30 
   1   6   2  515.85   18.30 
   1   6   2  501.35   18.00 
   1   6   2  486.95   18.30 
   1   6   2  488.75   18.20 
   1   6   2  473.95   17.90 
   1   6   2  484.75   18.40 
  -2  -6  -2   65.09    2.90 
  -2  -6  -2   67.09    3.20 
  -2  -6  -2   66.69    2.80 
  -2  -6  -2   63.79    2.90 
  -2  -6  -2   66.09    3.40 
  -2  -6  -2   64.49    4.50 
   2   6   2   65.59    3.30 
   2   6   2   66.69    3.30 
   2   6   2   64.89    3.00 
   2   6   2   60.39    4.10 
   2   6   2   61.39    3.30 
   2   6   2   67.89    3.30 
   2   6   2   61.69    4.60 
   2   6   2   62.89    3.30 
   2   6   2   70.49    3.40 
  -3  -6  -2    4.80    0.90 
  -3  -6  -2    7.40    1.00 
  -3  -6  -2    5.00    1.00 
  -3  -6  -2    6.00    0.80 
  -3  -6  -2    4.00    1.50 
  -3  -6  -2    5.70    0.80 
   3   6   2    7.80    1.30 
   3   6   2    6.40    1.10 
   3   6   2    7.50    1.30 
   3   6   2    5.30    1.10 
   3   6   2    7.10    1.20 
   3   6   2    7.70    1.80 
   3   6   2    5.70    1.10 
   3   6   2    6.40    0.90 
  -4  -6  -2  468.75   16.90 
  -4  -6  -2  456.75   19.10 
  -4  -6  -2  441.36   17.50 
  -4  -6  -2  474.75   17.00 
  -4  -6  -2  487.75   17.60 
  -4  -6  -2  463.95   17.10 
   4   6   2  453.35   17.40 
   4   6   2  474.15   17.40 
   4   6   2  490.35   17.50 
   4   6   2  500.55   17.50 
   4   6   2  467.05   17.10 
   4   6   2  444.46   17.50 
   4   6   2  481.85   17.50 
   4   6   2  502.95   17.80 
   4   6   2  470.25   17.30 
  -5  -6  -2  341.77   13.60 
  -5  -6  -2  361.56   13.10 
  -5  -6  -2  352.26   13.10 
  -5  -6  -2  354.36   13.00 
  -5  -6  -2  373.76   13.30 
  -5  -6  -2  368.76   13.70 
  -5  -6  -2  348.57   13.40 
  -5  -6  -2  361.86   13.90 
   5   6   2  323.77   13.60 
   5   6   2  362.86   13.50 
   5   6   2  348.87   13.70 
   5   6   2  405.66   14.70 
   5   6   2  362.96   13.70 
   5   6   2  368.06   14.00 
   5   6   2  368.66   13.60 
   5   6   2  340.57   13.50 
   5   6   2  352.26   13.50 
   5   6   2  365.86   13.30 
   5   6   2  384.56   13.70 
   5   6   2  350.06   13.20 
  -6  -6  -2   24.10    1.70 
  -6  -6  -2   27.10    1.90 
  -6  -6  -2   25.80    2.20 
  -6  -6  -2   26.10    2.50 
  -6  -6  -2   24.70    1.90 
   6   6   2   25.60    2.60 
   6   6   2   27.00    2.10 
   6   6   2   25.90    2.40 
   6   6   2   24.50    2.10 
   6   6   2   26.00    1.80 
   6   6   2   23.60    2.10 
   6   6   2   21.90    2.20 
   6   6   2   25.00    1.90 
   6   6   2   24.70    1.90 
   6   6   2   23.60    2.20 
   6   6   2   27.00    1.90 
  -7  -6  -2   29.60    2.00 
  -7  -6  -2   30.40    3.00 
  -7  -6  -2   30.40    2.20 
  -7  -6  -2   30.60    2.20 
   7   6   2   32.40    2.80 
   7   6   2   33.00    2.10 
   7   6   2   31.60    2.30 
   7   6   2   32.10    2.50 
   7   6   2   32.50    2.60 
   7   6   2   29.20    2.50 
   7   6   2   27.60    2.50 
   7   6   2   30.10    2.40 
   7   6   2   33.20    3.10 
   7   6   2   26.90    2.00 
   7   6   2   34.70    2.20 
  -8  -6  -2  218.28    8.30 
  -8  -6  -2  212.58   10.00 
  -8  -6  -2  227.88    8.50 
   8   6   2  208.18    8.80 
   8   6   2  205.48    9.10 
   8   6   2  209.18    9.40 
   8   6   2  203.08    8.90 
   8   6   2  209.68    8.60 
   8   6   2  228.78    8.70 
   8   6   2  218.48    9.00 
   8   6   2  224.28    9.10 
   8   6   2  229.48    9.60 
  -9  -6  -2  103.49    4.50 
  -9  -6  -2   99.19    4.30 
  -9  -6  -2  103.19    5.00 
   9   6   2   98.69    4.80 
   9   6   2  100.39    4.60 
   9   6   2   95.49    5.30 
   9   6   2   96.29    4.90 
   9   6   2   99.59    5.10 
   9   6   2   93.89    4.70 
   9   6   2  102.69    5.10 
   9   6   2  104.49    5.60 
 -10  -6  -2    7.30    0.90 
 -10  -6  -2    7.50    1.10 
  10   6   2    5.40    1.60 
  10   6   2    9.00    1.70 
  10   6   2    8.00    1.60 
  10   6   2    5.70    1.30 
  10   6   2    6.00    1.20 
 -11  -6  -2   16.80    1.70 
  11   6   2   17.50    2.50 
   4  -7  -2   42.10    2.40 
   4  -7  -2   39.70    2.80 
  -4   7   2   43.40    2.60 
  -4   7   2   42.00    2.40 
   3  -7  -2  182.08    8.40 
   3  -7  -2  219.98    8.50 
   3  -7  -2  224.28    8.70 
   3  -7  -2  214.58    9.10 
  -3   7   2  209.38    8.50 
  -3   7   2  195.98    7.80 
  -3   7   2  219.28    8.40 
   2  -7  -2   77.59    4.20 
   2  -7  -2   83.49    4.20 
   2  -7  -2   81.59    4.30 
   2  -7  -2   80.29    4.80 
   2  -7  -2   81.19    4.40 
  -2   7   2   77.49    3.50 
  -2   7   2   82.29    4.60 
  -2   7   2   82.39    4.10 
  -2   7   2   84.69    4.10 
  -2   7   2   74.39    4.10 
  -2   7   2   77.29    4.40 
   1  -7  -2   49.40    3.10 
   1  -7  -2   47.30    3.30 
   1  -7  -2   49.80    3.20 
   1  -7  -2   46.70    3.10 
  -1   7   2   41.60    2.30 
  -1   7   2   43.70    3.20 
  -1   7   2   46.30    2.90 
  -1   7   2   46.50    3.40 
  -1   7   2   46.60    3.00 
  -1   7   2   46.00    3.00 
  -1   7   2   45.30    3.20 
   0  -7  -2   49.00    3.00 
   0  -7  -2   48.00    2.80 
   0  -7  -2   46.50    3.10 
   0  -7  -2   48.70    3.10 
   0  -7  -2   45.10    3.00 
   0  -7  -2   46.50    3.40 
   0  -7  -2   45.50    2.50 
   0   7   2   46.10    3.10 
   0   7   2   51.49    3.00 
   0   7   2   48.30    2.80 
   0   7   2   41.90    2.80 
   0   7   2   48.00    2.90 
   0   7   2   51.79    3.30 
   0   7   2   45.10    3.10 
   0   7   2   44.20    3.10 
  -1  -7  -2  311.27   12.80 
  -1  -7  -2  316.37   12.20 
  -1  -7  -2  316.97   12.40 
  -1  -7  -2  325.87   12.70 
  -1  -7  -2  329.77   12.00 
  -1  -7  -2  311.87   12.50 
  -1  -7  -2  315.57   12.20 
  -1  -7  -2  302.67   11.90 
  -1  -7  -2  338.37   12.60 
   1   7   2  340.97   12.80 
   1   7   2  330.27   12.60 
   1   7   2  334.47   12.30 
   1   7   2  332.07   12.60 
   1   7   2  318.57   12.50 
   1   7   2  286.37   13.60 
   1   7   2  306.47   12.60 
   1   7   2  333.77   12.60 
   1   7   2  324.07   12.30 
   1   7   2  338.07   12.40 
  -2  -7  -2   85.59    4.30 
  -2  -7  -2   91.49    4.20 
  -2  -7  -2   95.39    3.90 
  -2  -7  -2   86.39    4.60 
  -2  -7  -2   93.19    4.30 
  -2  -7  -2   89.39    4.50 
  -2  -7  -2   85.69    4.30 
  -2  -7  -2   85.09    3.70 
   2   7   2   87.89    4.10 
   2   7   2   93.79    4.50 
   2   7   2   88.29    4.40 
   2   7   2   93.89    4.40 
   2   7   2   82.39    4.30 
   2   7   2   84.49    4.30 
   2   7   2   89.39    4.20 
   2   7   2   89.39    4.40 
   2   7   2   87.09    4.10 
   2   7   2   82.99    4.40 
  -3  -7  -2   53.19    3.10 
  -3  -7  -2   55.49    4.00 
  -3  -7  -2   57.79    3.00 
  -3  -7  -2   60.79    2.80 
  -3  -7  -2   58.99    3.40 
  -3  -7  -2   54.09    3.00 
  -3  -7  -2   49.80    3.10 
  -3  -7  -2   54.59    2.60 
   3   7   2   57.99    3.30 
   3   7   2   55.89    3.20 
   3   7   2   57.49    3.30 
   3   7   2   57.19    3.20 
   3   7   2   52.09    2.80 
   3   7   2   52.09    3.10 
   3   7   2   62.59    3.40 
   3   7   2   54.59    2.80 
   3   7   2   57.69    3.20 
   3   7   2   55.79    3.20 
   3   7   2   52.89    3.00 
  -4  -7  -2  305.97   11.90 
  -4  -7  -2  303.77   11.60 
  -4  -7  -2  310.27   11.90 
  -4  -7  -2  325.97   12.30 
  -4  -7  -2  304.77   11.40 
  -4  -7  -2  327.97   11.50 
  -4  -7  -2  303.27   11.40 
  -4  -7  -2  299.97   12.00 
   4   7   2  315.37   12.10 
   4   7   2  308.47   11.60 
   4   7   2  314.47   12.00 
   4   7   2  288.27   11.70 
   4   7   2  298.57   12.00 
   4   7   2  313.97   12.10 
   4   7   2  327.27   12.00 
   4   7   2  293.77   11.70 
   4   7   2  313.37   12.10 
   4   7   2  322.57   12.00 
   4   7   2  309.37   12.00 
   4   7   2  302.37   12.10 
  -5  -7  -2  219.48    8.60 
  -5  -7  -2  218.88    8.20 
  -5  -7  -2  216.38    8.40 
  -5  -7  -2  202.98    8.80 
  -5  -7  -2  197.28    8.70 
  -5  -7  -2  200.48    8.10 
  -5  -7  -2  217.78    8.20 
   5   7   2  217.18    8.70 
   5   7   2  229.68    8.90 
   5   7   2  212.68    8.80 
   5   7   2  226.78    8.70 
   5   7   2  203.08    8.60 
   5   7   2  211.98    8.90 
   5   7   2  219.88    8.70 
   5   7   2  213.08    8.30 
   5   7   2  221.38    8.80 
   5   7   2  214.38    8.40 
   5   7   2  217.18    8.70 
  -6  -7  -2  104.69    5.70 
  -6  -7  -2  100.69    4.80 
  -6  -7  -2  100.99    4.90 
  -6  -7  -2  108.99    4.80 
  -6  -7  -2  108.89    4.60 
  -6  -7  -2   99.99    4.30 
  -6  -7  -2  101.39    5.00 
   6   7   2  109.69    4.60 
   6   7   2   99.29    5.20 
   6   7   2  108.59    5.20 
   6   7   2  100.09    4.90 
   6   7   2  104.69    5.00 
   6   7   2   99.39    4.60 
   6   7   2  101.49    4.80 
   6   7   2  112.19    4.90 
   6   7   2  101.29    4.80 
   6   7   2  106.69    5.20 
   6   7   2  113.59    5.60 
  -7  -7  -2   28.10    2.10 
  -7  -7  -2   27.60    2.30 
  -7  -7  -2   28.50    2.80 
  -7  -7  -2   24.80    2.20 
  -7  -7  -2   27.00    2.50 
   7   7   2   24.20    2.00 
   7   7   2   24.00    2.20 
   7   7   2   27.90    2.20 
   7   7   2   23.60    3.40 
   7   7   2   28.50    2.70 
   7   7   2   25.80    2.00 
   7   7   2   26.00    2.60 
   7   7   2   26.90    2.40 
   7   7   2   31.70    3.30 
   7   7   2   25.50    2.00 
  -8  -7  -2  190.38    7.50 
  -8  -7  -2  200.68    7.80 
  -8  -7  -2  196.28    8.30 
   8   7   2  185.18    7.90 
   8   7   2  197.78    7.80 
   8   7   2  188.28    8.10 
   8   7   2  200.18    8.30 
   8   7   2  176.18    7.50 
   8   7   2  177.58    8.30 
   8   7   2  196.38    8.70 
   8   7   2  183.98    8.20 
   8   7   2  200.68    8.30 
  -9  -7  -2   82.79    3.90 
  -9  -7  -2   80.79    3.70 
  -9  -7  -2   75.79    4.40 
   9   7   2   78.59    4.20 
   9   7   2   77.19    4.50 
   9   7   2   81.39    3.90 
   9   7   2   81.09    4.60 
   9   7   2   81.29    4.90 
   9   7   2   78.09    4.40 
   9   7   2   80.39    4.10 
   9   7   2   81.19    4.30 
 -10  -7  -2   37.10    2.30 
 -10  -7  -2   43.40    2.20 
  10   7   2   38.30    2.60 
  10   7   2   37.70    3.00 
  10   7   2   36.50    2.70 
  10   7   2   34.70    2.70 
  10   7   2   39.90    2.60 
   3  -8  -2   34.00    2.00 
   3  -8  -2   27.30    2.30 
  -3   8   2   32.10    2.00 
   2  -8  -2   73.59    4.10 
   2  -8  -2   66.49    3.60 
   2  -8  -2   73.69    3.70 
   2  -8  -2   64.29    3.60 
  -2   8   2   72.59    3.60 
  -2   8   2   67.59    3.50 
  -2   8   2   62.09    3.50 
   1  -8  -2   39.30    2.90 
   1  -8  -2   39.60    2.80 
   1  -8  -2   43.80    3.20 
   1  -8  -2   43.70    2.80 
   1  -8  -2   43.20    3.40 
  -1   8   2   44.60    2.80 
  -1   8   2   42.80    2.90 
  -1   8   2   38.20    3.10 
   0  -8  -2  259.67   10.50 
   0  -8  -2  263.37   10.50 
   0  -8  -2  266.17   10.90 
   0  -8  -2  269.57   10.40 
   0   8   2  251.67   10.20 
   0   8   2  263.47   10.20 
   0   8   2  264.17   10.40 
   0   8   2  256.87   10.60 
   0   8   2  255.47   10.10 
   0   8   2  237.58   10.40 
  -1  -8  -2   54.09    3.50 
  -1  -8  -2   59.49    3.50 
  -1  -8  -2   62.99    3.90 
  -1  -8  -2   58.49    3.50 
  -1  -8  -2   60.29    3.50 
  -1  -8  -2   57.39    3.40 
  -1  -8  -2   58.39    3.00 
   1   8   2   55.39    3.50 
   1   8   2   57.59    3.30 
   1   8   2   51.29    3.50 
   1   8   2   63.39    3.60 
   1   8   2   57.09    3.60 
   1   8   2   58.89    3.70 
   1   8   2   58.49    3.80 
   1   8   2   55.19    3.30 
   1   8   2   54.69    3.40 
  -2  -8  -2  210.28    8.70 
  -2  -8  -2  222.18    8.80 
  -2  -8  -2  208.28    9.00 
  -2  -8  -2  210.98    9.20 
  -2  -8  -2  200.48    8.80 
  -2  -8  -2  217.58    8.30 
  -2  -8  -2  222.78    8.70 
   2   8   2  205.78    8.90 
   2   8   2  205.68    9.00 
   2   8   2  224.38    8.80 
   2   8   2  218.18    8.60 
   2   8   2  206.58    8.40 
   2   8   2  208.88    8.90 
   2   8   2  210.78    9.00 
   2   8   2  219.68    8.90 
   2   8   2  220.48    9.10 
  -3  -8  -2  120.59    5.50 
  -3  -8  -2  118.39    6.00 
  -3  -8  -2  125.09    5.60 
  -3  -8  -2  131.39    5.60 
  -3  -8  -2  116.69    5.40 
  -3  -8  -2  125.69    5.10 
  -3  -8  -2  119.79    5.80 
   3   8   2  121.89    5.70 
   3   8   2  125.39    5.80 
   3   8   2  120.19    5.60 
   3   8   2  119.39    5.40 
   3   8   2  121.29    5.80 
   3   8   2  118.59    5.70 
   3   8   2  119.39    5.70 
   3   8   2  114.29    5.20 
   3   8   2  118.59    5.60 
   3   8   2  102.19    5.30 
  -4  -8  -2  562.64   20.40 
  -4  -8  -2  569.34   20.00 
  -4  -8  -2  565.64   20.40 
  -4  -8  -2  535.05   20.40 
  -4  -8  -2  535.75   20.70 
   4   8   2  540.75   20.60 
   4   8   2  534.95   20.50 
   4   8   2  549.85   20.50 
   4   8   2  520.05   20.10 
   4   8   2  562.54   20.40 
   4   8   2  577.44   20.60 
   4   8   2  542.05   20.60 
   4   8   2  536.75   20.40 
  -5  -8  -2  495.15   17.90 
  -5  -8  -2  497.45   18.50 
  -5  -8  -2  482.75   17.80 
  -5  -8  -2  481.05   18.40 
  -5  -8  -2  463.15   18.60 
  -5  -8  -2  504.65   18.40 
   5   8   2  475.75   18.30 
   5   8   2  485.95   18.60 
   5   8   2  503.05   18.50 
   5   8   2  497.95   18.60 
   5   8   2  497.65   18.70 
   5   8   2  521.35   18.60 
   5   8   2  466.35   18.40 
   5   8   2  506.05   18.40 
  -6  -8  -2   37.50    2.20 
  -6  -8  -2   38.00    2.90 
  -6  -8  -2   34.80    2.70 
  -6  -8  -2   34.90    2.50 
  -6  -8  -2   41.80    2.70 
  -6  -8  -2   38.30    2.40 
   6   8   2   38.20    3.10 
   6   8   2   37.70    3.00 
   6   8   2   37.00    2.30 
   6   8   2   38.00    2.70 
   6   8   2   42.40    2.80 
   6   8   2   36.30    2.80 
   6   8   2   37.10    2.60 
   6   8   2   37.20    2.60 
  -7  -8  -2    7.50    1.60 
  -7  -8  -2    8.60    1.20 
  -7  -8  -2    5.70    1.30 
  -7  -8  -2    7.30    1.40 
   7   8   2    9.10    1.90 
   7   8   2    7.30    1.20 
   7   8   2    8.40    1.30 
   7   8   2    5.70    1.30 
   7   8   2    6.00    1.30 
   7   8   2    8.10    1.80 
   7   8   2    5.50    1.20 
   7   8   2    6.50    1.40 
  -8  -8  -2   16.30    1.80 
  -8  -8  -2   14.90    1.50 
  -8  -8  -2   16.80    2.00 
  -8  -8  -2   19.70    1.90 
   8   8   2   17.50    2.00 
   8   8   2   17.00    2.10 
   8   8   2   16.90    1.80 
   8   8   2   15.40    1.80 
   8   8   2   19.20    1.70 
   8   8   2   17.00    2.10 
   8   8   2   20.60    1.90 
  -9  -8  -2   26.20    2.20 
  -9  -8  -2   27.70    2.50 
  -9  -8  -2   31.30    2.00 
   9   8   2   24.50    2.50 
   9   8   2   29.20    2.50 
   9   8   2   29.60    2.60 
   9   8   2   27.60    2.30 
 -10  -8  -2   23.00    2.00 
 -10  -8  -2   30.30    1.70 
  10   8   2   25.90    1.90 
  10   8   2   18.80    2.10 
  10   8   2   27.50    2.10 
   1  -9  -2   88.09    4.10 
   1  -9  -2   89.89    4.10 
   1  -9  -2   90.79    4.50 
   1  -9  -2   88.99    4.30 
  -1   9   2   88.09    4.10 
  -1   9   2   93.29    4.10 
   0  -9  -2   35.60    2.60 
   0  -9  -2   39.30    2.70 
   0  -9  -2   33.70    3.00 
   0  -9  -2   40.80    3.00 
   0   9   2   41.90    2.70 
   0   9   2   43.70    2.60 
  -1  -9  -2    0.40    1.10 
  -1  -9  -2    0.30    1.30 
  -1  -9  -2    1.00    1.10 
   1   9   2    1.30    1.00 
   1   9   2   -0.10    1.20 
   1   9   2    3.40    1.20 
   1   9   2    1.20    1.30 
   1   9   2    0.80    1.10 
  -2  -9  -2   23.10    2.30 
  -2  -9  -2   24.00    2.30 
  -2  -9  -2   22.70    2.10 
  -2  -9  -2   22.40    1.80 
  -2  -9  -2   26.10    2.80 
  -2  -9  -2   27.30    2.30 
   2   9   2   22.60    2.30 
   2   9   2   23.60    2.40 
   2   9   2   25.10    2.10 
   2   9   2   21.30    2.30 
   2   9   2   19.90    2.20 
   2   9   2   23.30    2.30 
   2   9   2   23.40    2.50 
  -3  -9  -2  163.38    7.10 
  -3  -9  -2  171.78    7.10 
  -3  -9  -2  170.58    7.20 
  -3  -9  -2  170.28    7.70 
  -3  -9  -2  162.48    6.60 
   3   9   2  155.28    7.10 
   3   9   2  155.38    7.20 
   3   9   2  168.48    7.40 
   3   9   2  161.08    7.30 
   3   9   2  163.98    7.30 
   3   9   2  168.98    7.10 
   3   9   2  164.38    7.20 
  -4  -9  -2   24.10    1.90 
  -4  -9  -2   26.00    2.50 
  -4  -9  -2   27.40    2.50 
  -4  -9  -2   23.80    2.20 
   4   9   2   23.90    2.40 
   4   9   2   22.80    2.40 
   4   9   2   24.20    2.40 
   4   9   2   22.90    2.20 
   4   9   2   20.30    2.30 
   4   9   2   23.20    2.30 
   4   9   2   23.00    2.20 
  -5  -9  -2   49.40    2.70 
  -5  -9  -2   50.09    3.20 
  -5  -9  -2   53.89    3.30 
  -5  -9  -2   51.29    3.30 
   5   9   2   46.70    3.30 
   5   9   2   47.70    3.20 
   5   9   2   50.79    3.40 
   5   9   2   48.60    3.30 
   5   9   2   52.39    3.40 
   5   9   2   51.99    3.10 
  -6  -9  -2   32.10    2.70 
  -6  -9  -2   36.20    2.70 
  -6  -9  -2   34.60    2.80 
  -6  -9  -2   32.50    2.00 
  -6  -9  -2   32.40    2.10 
   6   9   2   34.70    2.70 
   6   9   2   31.50    2.40 
   6   9   2   32.40    2.50 
   6   9   2   33.80    2.60 
   6   9   2   34.90    2.90 
   6   9   2   32.00    2.70 
  -7  -9  -2   53.09    2.70 
  -7  -9  -2   53.39    3.40 
  -7  -9  -2   53.39    3.30 
  -7  -9  -2   58.59    3.50 
   7   9   2   53.09    3.10 
   7   9   2   53.49    3.20 
   7   9   2   57.39    3.10 
   7   9   2   54.99    3.00 
   7   9   2   54.59    3.60 
   7   9   2   55.99    3.30 
  -8  -9  -2   50.59    2.60 
  -8  -9  -2   48.80    2.90 
  -8  -9  -2   49.60    3.00 
  -8  -9  -2   42.50    2.70 
  -8  -9  -2   54.59    3.30 
   8   9   2   39.70    3.00 
   8   9   2   53.59    3.20 
   8   9   2   55.59    3.40 
   8   9   2   51.49    2.70 
  -9  -9  -2    3.20    1.20 
  -9  -9  -2    3.20    0.80 
  -9  -9  -2    1.50    1.20 
   9   9   2    1.40    1.10 
   9   9   2    0.70    1.10 
   9   9   2    3.00    0.70 
   9   9   2    2.90    1.10 
   0 -10  -2   21.40    1.90 
   0  10   2   20.30    1.60 
  -1 -10  -2  188.58    7.60 
  -1 -10  -2  186.08    7.30 
  -1 -10  -2  172.68    7.50 
   1  10   2  191.08    7.30 
   1  10   2  170.98    7.00 
   1  10   2  171.38    7.40 
  -2 -10  -2   78.39    3.80 
  -2 -10  -2   66.59    4.00 
   2  10   2   68.49    3.70 
   2  10   2   68.19    3.90 
   2  10   2   69.59    3.60 
  -3 -10  -2   90.99    5.10 
  -3 -10  -2   95.39    4.60 
  -3 -10  -2  105.39    4.80 
   3  10   2  102.19    4.70 
   3  10   2  105.69    4.90 
   3  10   2   99.99    5.00 
  -4 -10  -2   14.80    1.80 
  -4 -10  -2   18.20    2.00 
   4  10   2   18.50    2.00 
   4  10   2   15.80    2.00 
   4  10   2   18.50    1.80 
  -5 -10  -2   41.90    2.90 
  -5 -10  -2   47.30    3.00 
   5  10   2   46.80    3.10 
   5  10   2   48.80    2.70 
   5  10   2   42.60    2.90 
   5  10   2   44.10    3.00 
  -6 -10  -2   25.40    2.40 
  -6 -10  -2   29.40    2.40 
   6  10   2   25.50    2.00 
   6  10   2   24.80    2.40 
   6  10   2   24.00    2.30 
   6  10   2   30.00    2.30 
  -7 -10  -2   48.30    3.00 
  -7 -10  -2   49.00    2.90 
   7  10   2   46.60    3.10 
   7  10   2   43.90    2.50 
   7  10   2   42.60    2.70 
   7  10   2   44.10    2.50 
  -8 -10  -2    8.50    1.20 
  -8 -10  -2    6.80    1.20 
   8  10   2    8.90    1.40 
   8  10   2    9.60    1.10 
   8  10   2   10.60    1.30 
   9  10   2   60.69    4.00 
  -3 -11  -2    2.80    0.90 
   3  11   2    3.90    1.10 
   3  11   2    3.50    0.90 
   3  11   2    2.20    0.90 
  -4 -11  -2   81.59    3.80 
  -4 -11  -2   81.59    3.80 
   4  11   2   86.29    4.10 
   4  11   2   81.39    3.70 
   4  11   2   94.69    4.10 
  -5 -11  -2    5.80    1.10 
  -5 -11  -2    7.10    1.30 
   5  11   2    4.80    1.00 
   5  11   2    4.90    0.80 
   5  11   2    5.30    1.10 
  -6 -11  -2   15.50    1.50 
  -6 -11  -2   15.30    1.50 
   6  11   2   14.00    2.20 
   6  11   2   16.70    1.40 
   6  11   2   13.70    1.40 
   6  11   2   14.40    1.60 
  -7 -11  -2   78.79    3.60 
  -7 -11  -2   85.79    3.70 
   7  11   2   80.29    3.50 
  -6 -10   3   43.80    2.70 
   5  10  -3  116.79    4.70 
   5  10  -3  104.49    4.60 
   5  10  -3   84.99    4.30 
  -5 -10   3  106.99    4.50 
  -5 -10   3  106.59    4.50 
   4  10  -3   66.89    3.30 
   4  10  -3   62.59    3.20 
   4  10  -3   59.79    3.00 
   4  10  -3   57.79    2.90 
  -4 -10   3   63.59    3.20 
  -4 -10   3   65.69    3.20 
   3  10  -3   37.90    2.30 
   3  10  -3   36.30    2.20 
   3  10  -3   36.20    2.30 
   3  10  -3   35.80    2.30 
  -3 -10   3   36.60    2.30 
  -3 -10   3   40.00    2.60 
  -3 -10   3   34.00    2.10 
   2  10  -3    3.20    0.80 
   2  10  -3    7.90    1.10 
   2  10  -3    3.70    1.00 
  -2 -10   3    7.30    1.40 
  -2 -10   3    4.50    0.90 
   7   9  -3    0.40    0.80 
   7   9  -3    0.70    0.70 
   7   9  -3    0.90    0.70 
   7   9  -3   -1.40    1.00 
  -7  -9   3    0.60    0.60 
   6   9  -3  315.47   11.70 
   6   9  -3  311.07   12.70 
   6   9  -3  296.97   11.60 
   6   9  -3  295.07   11.30 
  -6  -9   3  310.77   11.10 
  -6  -9   3  313.97   11.70 
  -6  -9   3  282.57   11.40 
  -6  -9   3  289.37   11.40 
   5   9  -3   43.60    3.00 
   5   9  -3   53.59    3.20 
   5   9  -3   51.09    2.70 
   5   9  -3   46.10    2.70 
  -5  -9   3   46.00    2.40 
  -5  -9   3   53.89    3.20 
  -5  -9   3   45.70    2.90 
  -5  -9   3   49.60    2.90 
   4   9  -3  260.67   10.30 
   4   9  -3  251.87   10.20 
   4   9  -3  259.27   10.10 
   4   9  -3  242.78    9.70 
   4   9  -3  262.57   10.00 
  -4  -9   3  238.98   10.00 
  -4  -9   3  266.97   10.20 
  -4  -9   3  267.97   10.20 
   3   9  -3   84.69    4.20 
   3   9  -3   85.59    4.20 
   3   9  -3   75.49    4.00 
  -3  -9   3   79.79    4.20 
  -3  -9   3   74.19    3.90 
  -3  -9   3   79.89    4.20 
   2   9  -3   60.89    3.40 
   2   9  -3   61.59    3.40 
   2   9  -3   62.99    3.60 
  -2  -9   3   60.09    3.40 
  -2  -9   3   60.39    3.40 
  -2  -9   3   56.79    3.20 
   1   9  -3   22.70    2.10 
   1   9  -3   22.40    2.40 
  -1  -9   3   23.40    2.10 
  -1  -9   3   19.40    1.90 
  -1  -9   3   23.40    2.10 
   0   9  -3  243.18    9.30 
   0  -9   3  235.68    9.20 
   0  -9   3  238.38    9.20 
   1  -9   3  117.29    5.20 
   8   8  -3   78.99    4.10 
   8   8  -3   72.19    4.00 
   8   8  -3   71.39    3.60 
   8   8  -3   75.69    3.80 
   8   8  -3   74.89    3.40 
  -8  -8   3   81.59    3.30 
   7   8  -3   21.50    2.30 
   7   8  -3   21.20    2.20 
   7   8  -3   21.10    1.90 
   7   8  -3   20.00    2.00 
   7   8  -3   20.90    2.00 
   7   8  -3   21.50    2.50 
  -7  -8   3   17.70    1.80 
  -7  -8   3   22.00    1.70 
  -7  -8   3   21.70    1.80 
   6   8  -3  239.08    9.90 
   6   8  -3  253.07   10.20 
   6   8  -3  260.17    9.70 
   6   8  -3  255.07   10.40 
   6   8  -3  237.18    9.90 
   6   8  -3  246.48    9.90 
  -6  -8   3  244.48    9.60 
  -6  -8   3  252.87    9.40 
  -6  -8   3  236.28    9.70 
   5   8  -3  252.87   10.70 
   5   8  -3  260.97   10.50 
   5   8  -3  241.88   10.20 
   5   8  -3  244.38   10.10 
   5   8  -3  268.87   10.70 
   5   8  -3  266.97   10.50 
   5   8  -3  262.37   10.00 
  -5  -8   3  260.17   10.00 
  -5  -8   3  256.97    9.80 
  -5  -8   3  272.57    9.80 
  -5  -8   3  248.38   10.10 
  -5  -8   3  255.47   10.20 
   4   8  -3  167.38    6.70 
   4   8  -3  161.68    7.20 
   4   8  -3  159.18    7.20 
   4   8  -3  169.18    7.30 
   4   8  -3  156.68    7.20 
   4   8  -3  167.78    7.00 
   4   8  -3  155.58    7.40 
   4   8  -3  160.68    6.90 
  -4  -8   3  167.78    7.10 
  -4  -8   3  155.48    7.00 
  -4  -8   3  172.98    7.20 
  -4  -8   3  157.28    6.70 
  -4  -8   3  170.48    6.50 
  -4  -8   3  163.68    6.60 
   3   8  -3  253.87   10.50 
   3   8  -3  274.07   10.50 
   3   8  -3  256.47    9.90 
   3   8  -3  260.77   10.30 
   3   8  -3  259.07   10.50 
   3   8  -3  248.68   10.60 
  -3  -8   3  255.37   10.30 
  -3  -8   3  237.28   10.20 
  -3  -8   3  271.77   10.50 
  -3  -8   3  267.67   10.40 
  -3  -8   3  259.37    9.90 
  -3  -8   3  257.67    9.70 
   2   8  -3   37.20    2.90 
   2   8  -3   34.60    2.70 
   2   8  -3   32.80    2.70 
   2   8  -3   40.80    3.00 
   2   8  -3   34.70    2.70 
  -2  -8   3   30.70    2.60 
  -2  -8   3   37.80    2.90 
  -2  -8   3   35.00    2.80 
  -2  -8   3   33.10    2.60 
  -2  -8   3   33.30    2.20 
   1   8  -3  223.88    9.00 
   1   8  -3  209.58    8.70 
   1   8  -3  210.38    8.90 
   1   8  -3  212.68    8.70 
   1   8  -3  216.98    9.10 
  -1  -8   3  205.38    8.80 
  -1  -8   3  226.98    8.80 
  -1  -8   3  203.88    8.60 
  -1  -8   3  191.08    8.10 
  -1  -8   3  209.08    8.70 
   0   8  -3   43.90    2.80 
   0   8  -3   34.80    3.20 
   0   8  -3   43.80    3.20 
   0  -8   3   39.00    2.90 
   0  -8   3   40.60    2.80 
   0  -8   3   43.00    2.80 
   0  -8   3   44.50    2.90 
   0  -8   3   39.40    3.10 
  -1   8  -3    8.10    1.40 
  -1   8  -3    8.40    1.40 
  -1   8  -3    9.20    1.60 
   1  -8   3    9.50    1.40 
   1  -8   3    8.00    1.40 
  -2   8  -3    9.20    1.30 
   2  -8   3   10.20    1.40 
   2  -8   3   10.50    1.50 
   2  -8   3    8.30    1.10 
   9   7  -3   44.00    2.50 
   9   7  -3   40.30    2.70 
   9   7  -3   44.80    2.90 
   9   7  -3   42.60    2.50 
  -9  -7   3   41.40    2.00 
   8   7  -3   18.00    2.30 
   8   7  -3   14.30    1.80 
   8   7  -3   15.20    2.00 
   8   7  -3   14.70    1.40 
   8   7  -3   10.30    1.40 
  -8  -7   3   14.50    1.50 
  -8  -7   3   15.50    1.30 
   7   7  -3  172.68    7.60 
   7   7  -3  179.18    7.80 
   7   7  -3  196.38    7.40 
   7   7  -3  176.88    7.90 
   7   7  -3  183.48    8.20 
  -7  -7   3  176.58    7.20 
  -7  -7   3  175.58    7.00 
   6   7  -3  877.61   30.70 
   6   7  -3  846.62   30.30 
   6   7  -3  843.72   29.70 
   6   7  -3  830.82   30.00 
   6   7  -3  832.72   30.10 
   6   7  -3  773.32   29.80 
   6   7  -3  839.12   30.30 
   6   7  -3  793.12   30.00 
  -6  -7   3  801.22   29.40 
  -6  -7   3  786.92   29.30 
  -6  -7   3  789.32   29.80 
  -6  -7   3  858.21   29.60 
   5   7  -3   15.10    2.20 
   5   7  -3   17.00    2.00 
   5   7  -3   17.20    2.00 
   5   7  -3   18.40    1.80 
   5   7  -3   11.20    1.70 
   5   7  -3   14.50    1.80 
   5   7  -3   18.70    2.40 
   5   7  -3   18.80    2.30 
   5   7  -3   14.30    1.80 
  -5  -7   3   15.50    1.70 
  -5  -7   3   10.70    1.30 
  -5  -7   3    9.60    1.60 
  -5  -7   3    9.60    1.60 
  -5  -7   3   17.20    1.60 
  -5  -7   3   14.30    1.60 
   4   7  -3   38.20    2.90 
   4   7  -3   39.30    2.40 
   4   7  -3   39.80    3.30 
   4   7  -3   41.40    3.00 
   4   7  -3   34.70    2.60 
   4   7  -3   41.70    2.90 
   4   7  -3   37.90    2.60 
   4   7  -3   43.40    3.00 
   4   7  -3   42.30    3.20 
   4   7  -3   37.10    2.60 
  -4  -7   3   36.20    2.70 
  -4  -7   3   38.30    2.60 
  -4  -7   3   37.20    2.30 
  -4  -7   3   39.20    3.00 
  -4  -7   3   40.90    2.60 
  -4  -7   3   38.30    2.30 
   3   7  -3  633.24   23.10 
   3   7  -3  616.74   23.30 
   3   7  -3  645.14   23.30 
   3   7  -3  633.04   23.40 
   3   7  -3  604.14   22.70 
   3   7  -3  650.43   23.40 
   3   7  -3  634.84   23.50 
   3   7  -3  633.14   23.10 
  -3  -7   3  610.94   23.00 
  -3  -7   3  639.04   22.60 
  -3  -7   3  613.74   23.00 
  -3  -7   3  631.24   22.80 
  -3  -7   3  638.64   22.70 
  -3  -7   3  603.14   23.50 
   2   7  -3  405.26   15.40 
   2   7  -3  389.36   14.70 
   2   7  -3  395.86   15.50 
   2   7  -3  413.16   15.30 
   2   7  -3  397.76   15.30 
   2   7  -3  409.86   15.20 
  -2  -7   3  386.96   15.10 
  -2  -7   3  377.96   15.40 
  -2  -7   3  405.96   14.60 
  -2  -7   3  388.96   15.20 
  -2  -7   3  401.46   15.30 
  -2  -7   3  402.86   15.20 
  -2  -7   3  401.76   14.70 
   1   7  -3  482.45   18.50 
   1   7  -3  501.65   18.90 
   1   7  -3  509.25   18.80 
   1   7  -3  489.35   18.70 
   1   7  -3  512.05   18.60 
  -1  -7   3  453.45   18.60 
  -1  -7   3  506.85   18.60 
  -1  -7   3  495.85   18.00 
  -1  -7   3  513.95   18.70 
  -1  -7   3  492.25   18.50 
  -1  -7   3  490.55   18.40 
  -1  -7   3  484.05   18.20 
   0   7  -3  180.08    7.50 
   0   7  -3  184.28    7.90 
   0   7  -3  174.28    7.80 
   0   7  -3  161.38    7.10 
   0   7  -3  183.28    7.80 
   0   7  -3  172.58    7.70 
   0  -7   3  162.48    7.20 
   0  -7   3  186.48    7.60 
   0  -7   3  168.28    7.40 
   0  -7   3  171.68    7.90 
   0  -7   3  173.58    7.40 
   0  -7   3  181.18    7.60 
  -1   7  -3   77.49    3.90 
  -1   7  -3   67.99    4.20 
  -1   7  -3   75.99    4.40 
  -1   7  -3   73.39    4.20 
  -1   7  -3   69.79    3.70 
   1  -7   3   68.19    3.70 
   1  -7   3   73.49    3.80 
   1  -7   3   72.99    4.00 
   1  -7   3   73.09    4.00 
   1  -7   3   69.29    4.40 
   1  -7   3   76.89    4.00 
  -2   7  -3  245.78   10.20 
  -2   7  -3  233.68    9.70 
  -2   7  -3  235.48    9.50 
  -2   7  -3  238.18   10.30 
  -2   7  -3  257.57    9.70 
  -2   7  -3  240.18   10.00 
   2  -7   3  244.88    9.70 
   2  -7   3  241.18    9.70 
   2  -7   3  238.48    9.90 
   2  -7   3  254.67    9.80 
  -3   7  -3  129.49    5.80 
  -3   7  -3  133.99    5.70 
   3  -7   3  128.79    5.60 
   3  -7   3  133.99    6.10 
   3  -7   3  129.29    5.70 
  -4   7  -3   28.80    2.10 
  -4   7  -3   29.80    2.10 
   4  -7   3   32.20    2.50 
   4  -7   3   25.90    1.90 
   4  -7   3   30.10    2.20 
   4  -7   3   29.60    2.00 
   9   6  -3   32.40    2.90 
   9   6  -3   42.00    2.90 
   9   6  -3   43.60    2.60 
   9   6  -3   46.70    2.70 
   9   6  -3   42.30    3.00 
   8   6  -3  152.78    6.50 
   8   6  -3  151.98    6.80 
   8   6  -3  150.08    6.10 
   8   6  -3  154.78    6.60 
   8   6  -3  134.59    6.60 
   8   6  -3  149.29    7.00 
  -8  -6   3  138.09    5.90 
   7   6  -3  122.39    5.70 
   7   6  -3  126.19    6.40 
   7   6  -3  119.89    5.80 
   7   6  -3  126.99    5.30 
   7   6  -3  110.09    5.90 
   7   6  -3  122.69    6.10 
  -7  -6   3  117.49    5.10 
   6   6  -3  638.04   22.90 
   6   6  -3  611.44   23.10 
   6   6  -3  569.84   22.60 
   6   6  -3  604.54   22.40 
   6   6  -3  628.24   22.70 
   6   6  -3  599.04   22.70 
   6   6  -3  609.64   22.50 
   6   6  -3  576.24   22.20 
   6   6  -3  619.44   22.20 
  -6  -6   3  593.94   21.90 
  -6  -6   3  634.04   22.00 
   5   6  -3  462.05   17.20 
   5   6  -3  453.95   16.50 
   5   6  -3  456.45   17.00 
   5   6  -3  450.45   17.10 
   5   6  -3  443.36   16.90 
   5   6  -3  431.26   16.80 
   5   6  -3  455.75   17.40 
   5   6  -3  446.46   16.90 
   5   6  -3  421.16   16.50 
  -5  -6   3  431.76   16.20 
  -5  -6   3  462.95   16.40 
  -5  -6   3  433.16   17.10 
  -5  -6   3  457.95   16.40 
   4   6  -3  236.18    9.70 
   4   6  -3  232.68    9.30 
   4   6  -3  237.28    9.10 
   4   6  -3  231.78    9.50 
   4   6  -3  229.48    9.80 
   4   6  -3  245.18    9.60 
   4   6  -3  250.17    9.80 
   4   6  -3  237.08    9.30 
   4   6  -3  228.18    9.20 
   4   6  -3  226.78    9.10 
   4   6  -3  224.78    9.40 
   4   6  -3  249.48    9.60 
  -4  -6   3  240.28    9.70 
  -4  -6   3  245.08    9.10 
  -4  -6   3  240.98    9.00 
  -4  -6   3  220.38    8.90 
  -4  -6   3  235.58    9.20 
  -4  -6   3  225.08    8.90 
   3   6  -3  445.46   16.20 
   3   6  -3  421.86   16.10 
   3   6  -3  418.86   16.30 
   3   6  -3  430.06   16.10 
   3   6  -3  423.46   15.90 
   3   6  -3  419.26   15.60 
   3   6  -3  443.96   16.30 
   3   6  -3  422.66   15.90 
   3   6  -3  442.86   16.20 
   3   6  -3  403.56   15.70 
  -3  -6   3  431.36   16.30 
  -3  -6   3  410.56   15.40 
  -3  -6   3  463.95   15.70 
  -3  -6   3  440.96   15.60 
  -3  -6   3  421.06   15.50 
  -3  -6   3  416.46   15.80 
  -3  -6   3  400.76   15.80 
  -3  -6   3  394.06   15.80 
   2   6  -3   34.60    2.20 
   2   6  -3   34.70    2.40 
   2   6  -3   37.50    2.50 
   2   6  -3   36.00    2.10 
   2   6  -3   34.20    2.50 
   2   6  -3   38.70    2.60 
   2   6  -3   39.70    2.70 
   2   6  -3   38.00    2.80 
  -2  -6   3   33.20    1.90 
  -2  -6   3   37.00    2.10 
  -2  -6   3   36.40    2.30 
  -2  -6   3   38.00    2.50 
  -2  -6   3   35.50    2.30 
  -2  -6   3   34.50    2.20 
  -2  -6   3   35.00    2.10 
  -2  -6   3   37.10    2.60 
   1   6  -3  145.79    6.30 
   1   6  -3  138.19    6.10 
   1   6  -3  144.89    6.30 
   1   6  -3  142.39    6.10 
   1   6  -3  151.28    6.40 
  -1  -6   3  143.99    5.90 
  -1  -6   3  143.59    6.20 
  -1  -6   3  136.79    6.00 
  -1  -6   3  134.49    6.10 
  -1  -6   3  143.69    5.70 
  -1  -6   3  127.49    5.50 
  -1  -6   3  143.29    6.20 
  -1  -6   3  146.39    6.30 
   0   6  -3   41.60    2.60 
   0   6  -3   43.00    2.70 
   0   6  -3   43.10    3.00 
   0   6  -3   41.90    2.50 
   0   6  -3   39.70    2.80 
   0   6  -3   44.00    3.10 
   0  -6   3   39.40    2.60 
   0  -6   3   40.50    3.10 
   0  -6   3   44.70    2.60 
   0  -6   3   43.40    2.50 
   0  -6   3   39.70    2.10 
   0  -6   3   43.20    2.70 
   0  -6   3   38.20    2.10 
   0  -6   3   41.10    2.80 
   0  -6   3   43.80    2.70 
  -1   6  -3   57.59    3.20 
  -1   6  -3   60.69    3.70 
  -1   6  -3   62.89    3.80 
  -1   6  -3   57.79    3.30 
  -1   6  -3   57.39    3.50 
  -1   6  -3   57.89    3.20 
   1  -6   3   56.99    3.40 
   1  -6   3   56.39    3.40 
   1  -6   3   60.89    3.80 
   1  -6   3   62.39    3.30 
   1  -6   3   59.49    3.40 
   1  -6   3   56.99    3.30 
  -2   6  -3  343.97   13.40 
  -2   6  -3  335.67   13.00 
  -2   6  -3  334.07   13.40 
  -2   6  -3  333.67   12.80 
  -2   6  -3  338.47   12.80 
  -2   6  -3  325.37   13.20 
   2  -6   3  336.87   12.90 
   2  -6   3  331.27   13.10 
   2  -6   3  326.57   12.90 
   2  -6   3  330.67   13.40 
   2  -6   3  339.57   13.00 
  -3   6  -3   13.50    2.00 
  -3   6  -3   12.90    1.80 
  -3   6  -3   18.00    2.00 
  -3   6  -3   14.50    2.10 
   3  -6   3   13.60    1.60 
   3  -6   3   18.30    1.90 
   3  -6   3   17.40    1.90 
   3  -6   3   18.90    2.00 
  -4   6  -3    1.20    1.00 
  -4   6  -3    2.10    1.30 
   4  -6   3    1.40    1.00 
   4  -6   3    1.60    1.20 
   4  -6   3    1.70    1.10 
  -5   6  -3   49.30    2.80 
  -5   6  -3   48.70    2.70 
   5  -6   3   52.49    3.00 
   5  -6   3   45.40    2.60 
   5  -6   3   43.90    2.50 
   5  -6   3   43.80    2.50 
   9   5  -3    5.60    1.40 
   9   5  -3   11.40    1.90 
   9   5  -3    6.50    1.60 
   9   5  -3    8.50    1.30 
   9   5  -3    7.40    1.20 
   8   5  -3   62.79    3.60 
   8   5  -3   67.69    4.30 
   8   5  -3   67.19    3.80 
   8   5  -3   65.49    4.10 
   8   5  -3   64.99    4.10 
   8   5  -3   53.39    3.20 
  -8  -5   3   59.79    2.80 
   7   5  -3  267.87   11.10 
   7   5  -3  267.67   10.80 
   7   5  -3  266.57   10.70 
   7   5  -3  269.47   11.00 
   7   5  -3  263.57   10.20 
   7   5  -3  284.37   11.50 
   7   5  -3  250.97   10.40 
  -7  -5   3  257.97    9.90 
   6   5  -3  140.29    6.40 
   6   5  -3  130.89    6.10 
   6   5  -3  132.99    5.60 
   6   5  -3  125.39    6.20 
   6   5  -3  129.79    6.10 
   6   5  -3  129.49    5.70 
   6   5  -3  136.79    6.70 
   6   5  -3  134.59    6.10 
  -6  -5   3  134.39    5.30 
   5   5  -3   66.69    3.70 
   5   5  -3   63.99    3.50 
   5   5  -3   61.59    3.40 
   5   5  -3   66.19    3.60 
   5   5  -3   68.29    3.90 
   5   5  -3   59.49    3.70 
   5   5  -3   62.99    3.20 
   5   5  -3   67.19    3.70 
   5   5  -3   66.79    4.00 
   5   5  -3   68.19    3.30 
  -5  -5   3   65.09    3.00 
  -5  -5   3   64.09    3.00 
  -5  -5   3   62.99    2.90 
  -5  -5   3   66.79    3.60 
   4   5  -3  102.79    4.80 
   4   5  -3  101.39    5.10 
   4   5  -3  100.79    4.70 
   4   5  -3   95.49    4.80 
   4   5  -3  100.59    4.30 
   4   5  -3   94.69    4.40 
   4   5  -3   96.89    4.60 
   4   5  -3   96.99    4.60 
   4   5  -3   98.19    4.70 
   4   5  -3   99.79    4.30 
  -4  -5   3  112.59    4.30 
  -4  -5   3   91.19    5.10 
  -4  -5   3  105.39    4.80 
  -4  -5   3  101.69    4.10 
  -4  -5   3  103.49    4.20 
   3   5  -3  130.29    5.70 
   3   5  -3  126.89    5.30 
   3   5  -3  135.99    5.70 
   3   5  -3  134.29    6.10 
   3   5  -3  125.39    5.30 
   3   5  -3  132.09    5.90 
   3   5  -3  125.79    5.70 
   3   5  -3  130.59    5.70 
  -3  -5   3  139.19    5.90 
  -3  -5   3  123.59    6.50 
  -3  -5   3  138.39    5.20 
  -3  -5   3  125.79    5.40 
  -3  -5   3  137.99    5.30 
  -3  -5   3  136.39    5.30 
   2   5  -3   46.40    2.40 
   2   5  -3   51.09    2.80 
   2   5  -3   46.70    2.60 
   2   5  -3   45.30    2.90 
   2   5  -3   46.90    2.70 
  -2  -5   3   46.30    2.60 
  -2  -5   3   47.40    2.40 
  -2  -5   3   45.10    2.30 
  -2  -5   3   47.90    2.80 
  -2  -5   3   45.90    2.30 
  -2  -5   3   44.40    3.50 
  -2  -5   3   46.00    2.20 
   1   5  -3  868.31   30.40 
   1   5  -3  853.01   30.30 
  -1  -5   3  789.62   30.40 
  -1  -5   3  806.52   29.80 
  -1  -5   3  874.21   30.20 
  -1  -5   3  835.52   29.90 
  -1  -5   3  840.22   29.70 
  -1  -5   3  789.22   31.70 
  -1  -5   3  876.41   29.80 
  -1  -5   3  873.71   30.40 
   0   5  -3  271.77   10.70 
   0   5  -3  270.17   10.60 
   0   5  -3  277.97   10.90 
   0   5  -3  297.27   11.10 
   0   5  -3  271.37   12.70 
   0   5  -3  255.57   11.20 
   0   5  -3  291.97   11.00 
   0  -5   3  316.27   10.70 
   0  -5   3  268.27   10.70 
   0  -5   3  281.97   10.80 
   0  -5   3  276.17   10.20 
   0  -5   3  276.97   10.30 
   0  -5   3  263.67   12.40 
   0  -5   3  277.67   10.60 
   0  -5   3  298.07   10.80 
   0  -5   3  273.67   10.70 
  -1   5  -3   11.70    1.40 
  -1   5  -3   14.30    1.50 
  -1   5  -3   15.40    1.70 
  -1   5  -3   15.00    1.90 
  -1   5  -3   14.80    1.80 
  -1   5  -3   15.40    1.90 
   1  -5   3   13.30    1.60 
   1  -5   3   13.70    1.50 
   1  -5   3   15.50    1.90 
   1  -5   3   14.90    1.50 
   1  -5   3   11.30    1.50 
   1  -5   3   15.90    1.70 
  -2   5  -3  249.97   10.10 
  -2   5  -3  276.17   10.70 
  -2   5  -3  276.27   10.70 
  -2   5  -3  263.67   10.10 
  -2   5  -3  260.87   10.30 
  -2   5  -3  249.38   10.50 
  -2   5  -3  244.48   10.20 
   2  -5   3  262.67   10.20 
   2  -5   3  274.77   10.40 
   2  -5   3  259.77   10.30 
   2  -5   3  273.97   10.20 
   2  -5   3  265.47   10.80 
   2  -5   3  235.48   10.00 
   2  -5   3  256.07   10.20 
  -3   5  -3   52.99    3.60 
  -3   5  -3   51.39    3.10 
  -3   5  -3   52.89    3.40 
  -3   5  -3   54.69    3.70 
  -3   5  -3   50.09    3.40 
   3  -5   3   52.99    3.10 
   3  -5   3   54.69    3.70 
   3  -5   3   50.99    3.10 
   3  -5   3   52.29    3.10 
   3  -5   3   52.29    3.20 
  -4   5  -3  127.79    5.60 
  -4   5  -3  122.39    5.80 
  -4   5  -3  121.49    6.00 
  -4   5  -3  127.69    6.20 
   4  -5   3  123.79    5.70 
   4  -5   3  121.49    5.50 
   4  -5   3  123.59    5.60 
   4  -5   3  124.09    6.00 
  -5   5  -3   55.79    3.60 
  -5   5  -3   60.19    3.40 
   5  -5   3   60.09    3.40 
   5  -5   3   58.59    3.70 
   5  -5   3   57.69    3.30 
   5  -5   3   56.29    3.40 
  -6   5  -3   94.39    4.40 
  -6   5  -3   84.69    4.00 
  -6   5  -3   96.89    4.20 
   6  -5   3   94.99    4.10 
   6  -5   3   96.19    4.60 
   6  -5   3   95.39    4.20 
   9   4  -3  133.49    6.10 
   9   4  -3  143.99    6.40 
   9   4  -3  134.29    5.80 
   9   4  -3  132.19    6.20 
   8   4  -3   98.59    4.70 
   8   4  -3   96.29    5.30 
   8   4  -3   85.09    4.40 
   8   4  -3   92.49    4.60 
   8   4  -3   95.99    5.30 
   8   4  -3   99.89    5.20 
   7   4  -3  299.17   11.70 
   7   4  -3  291.47   11.30 
   7   4  -3  297.37   11.80 
   7   4  -3  279.67   11.00 
   7   4  -3  258.87   10.60 
   7   4  -3  290.47   11.90 
   7   4  -3  282.47   11.20 
  -7  -4   3  261.27   12.10 
   6   4  -3   10.20    1.80 
   6   4  -3   11.70    1.50 
   6   4  -3   21.00    2.50 
   6   4  -3   13.70    1.80 
   6   4  -3   12.80    1.70 
   6   4  -3   14.00    1.40 
   6   4  -3   14.50    2.20 
   5   4  -3  187.38    7.80 
   5   4  -3  182.98    7.10 
   5   4  -3  182.38    7.20 
   5   4  -3  181.38    7.80 
   5   4  -3  177.58    7.50 
   5   4  -3  178.68    7.60 
   5   4  -3  171.98    7.30 
   5   4  -3  172.58    7.40 
   5   4  -3  178.08    8.00 
   5   4  -3  188.98    7.50 
  -5  -4   3  185.48    7.50 
  -5  -4   3  181.68    6.90 
  -5  -4   3  188.28    6.90 
   4   4  -3  726.13   27.70 
   4   4  -3  730.33   29.20 
   4   4  -3  880.71   28.60 
   4   4  -3  670.53   28.40 
   4   4  -3  778.92   27.60 
   4   4  -3  752.22   28.10 
  -4  -4   3  780.92   27.40 
  -4  -4   3  822.82   27.50 
  -4  -4   3  812.62   28.00 
   3   4  -3  321.47   12.00 
   3   4  -3  319.77   11.90 
   3   4  -3  298.57   11.70 
  -3  -4   3  323.27   11.60 
  -3  -4   3  333.97   11.70 
  -3  -4   3  324.67   12.10 
  -3  -4   3  327.07   12.70 
  -3  -4   3  305.67   11.80 
  -3  -4   3  319.27   11.50 
   2   4  -3 1208.18   44.50 
   2   4  -3 1189.18   44.50 
   2   4  -3 1282.47   44.80 
   2   4  -3 1255.57   44.70 
  -2  -4   3 1297.77   44.70 
  -2  -4   3 1264.17   44.80 
  -2  -4   3 1313.37   44.50 
  -2  -4   3 1318.77   44.40 
  -2  -4   3 1190.48   44.40 
  -2  -4   3 1335.17   45.00 
  -2  -4   3 1259.77   44.40 
  -2  -4   3 1273.07   45.80 
   1   4  -3 1633.74   56.49 
   1   4  -3 1561.94   56.19 
   1   4  -3 1525.15   57.69 
   1   4  -3 1619.84   56.89 
   1   4  -3 1599.14   56.19 
   1   4  -3 1616.34   56.39 
   1   4  -3 1626.94   56.39 
  -1  -4   3 1674.83   56.49 
  -1  -4   3 1592.14   56.19 
  -1  -4   3 1578.94   56.19 
  -1  -4   3 1650.13   56.59 
  -1  -4   3 1627.64   56.09 
  -1  -4   3 1588.04   56.09 
  -1  -4   3 1520.85   56.59 
  -1  -4   3 1623.14   57.69 
   0   4  -3   66.59    3.00 
   0   4  -3   68.29    3.30 
   0   4  -3   67.89    4.40 
   0   4  -3   68.09    3.20 
   0   4  -3   65.19    3.10 
   0   4  -3   64.89    3.00 
   0   4  -3   64.99    3.60 
   0   4  -3   61.79    3.10 
   0  -4   3   68.99    3.20 
   0  -4   3   62.79    2.90 
   0  -4   3   64.99    4.20 
   0  -4   3   66.49    2.70 
   0  -4   3   66.89    2.80 
   0  -4   3   67.39    3.20 
   0  -4   3   68.19    3.50 
   0  -4   3   68.19    3.00 
  -1   4  -3  474.55   18.10 
  -1   4  -3  495.05   18.10 
  -1   4  -3  478.95   20.10 
  -1   4  -3  531.75   18.40 
  -1   4  -3  540.75   18.50 
  -1   4  -3  504.45   18.10 
  -1   4  -3  485.65   18.00 
  -1   4  -3  493.55   18.60 
  -1   4  -3  491.05   19.00 
   1  -4   3  518.35   18.30 
   1  -4   3  494.75   18.60 
   1  -4   3  530.45   18.10 
   1  -4   3  479.45   19.70 
   1  -4   3  505.55   18.50 
   1  -4   3  489.55   18.10 
   1  -4   3  487.85   17.70 
   1  -4   3  492.35   18.10 
   1  -4   3  479.15   17.70 
  -2   4  -3  390.76   15.00 
  -2   4  -3  431.46   15.30 
  -2   4  -3  441.26   15.40 
  -2   4  -3  377.86   17.10 
  -2   4  -3  387.16   15.00 
  -2   4  -3  393.86   14.90 
  -2   4  -3  388.56   14.80 
  -2   4  -3  396.56   15.00 
   2  -4   3  365.96   16.50 
   2  -4   3  401.76   15.30 
   2  -4   3  393.66   14.90 
   2  -4   3  426.66   15.10 
   2  -4   3  416.46   15.00 
   2  -4   3  389.56   14.90 
   2  -4   3  426.46   14.90 
  -3   4  -3    1.50    1.30 
  -3   4  -3    1.40    1.20 
  -3   4  -3    0.60    1.00 
  -3   4  -3    0.00    0.90 
  -3   4  -3    0.70    0.80 
  -3   4  -3    1.00    0.80 
  -3   4  -3    1.50    0.70 
  -3   4  -3    1.30    1.00 
   3  -4   3    0.50    0.90 
   3  -4   3    0.70    0.90 
   3  -4   3    0.50    0.80 
   3  -4   3    1.10    1.00 
   3  -4   3    1.10    0.90 
   3  -4   3    0.90    1.00 
  -4   4  -3   96.89    5.00 
  -4   4  -3   99.49    5.10 
  -4   4  -3  100.29    4.90 
  -4   4  -3   98.69    4.20 
  -4   4  -3  100.29    4.70 
  -4   4  -3   95.09    4.90 
  -4   4  -3  104.49    5.20 
   4  -4   3  103.79    4.80 
   4  -4   3   97.29    4.60 
   4  -4   3   97.69    4.70 
   4  -4   3  101.29    4.80 
   4  -4   3   95.59    4.80 
  -5   4  -3  352.86   13.20 
  -5   4  -3  345.27   12.70 
  -5   4  -3  346.47   13.80 
  -5   4  -3  321.87   13.50 
  -5   4  -3  345.27   13.80 
  -5   4  -3  353.96   13.50 
   5  -4   3  347.47   13.30 
   5  -4   3  352.86   13.50 
   5  -4   3  322.97   13.10 
   5  -4   3  341.47   13.30 
   5  -4   3  366.26   13.90 
  -6   4  -3  516.65   19.50 
  -6   4  -3  560.14   20.10 
  -6   4  -3  539.15   20.30 
   6  -4   3  561.04   20.20 
   6  -4   3  566.94   20.30 
   6  -4   3  515.05   20.00 
   6  -4   3  579.34   20.80 
  -7   4  -3  131.59    5.50 
  -7   4  -3  124.29    5.30 
  -7   4  -3  128.29    5.30 
   7  -4   3  132.79    5.80 
   7  -4   3  129.39    5.30 
   9   3  -3  104.79    4.80 
   9   3  -3  116.69    5.50 
   9   3  -3  113.49    5.30 
   9   3  -3  113.99    5.50 
   8   3  -3   69.39    3.70 
   8   3  -3   78.99    4.50 
   8   3  -3   74.79    4.00 
   8   3  -3   74.49    3.90 
   8   3  -3   77.79    4.60 
   8   3  -3   75.29    4.70 
   7   3  -3  409.96   15.50 
   7   3  -3  415.16   15.70 
   7   3  -3  405.66   15.60 
   7   3  -3  413.06   16.30 
   7   3  -3  399.06   15.40 
   7   3  -3  413.76   16.10 
   7   3  -3  425.86   16.40 
   6   3  -3   57.19    3.20 
   6   3  -3   63.89    3.90 
   6   3  -3   64.79    3.30 
   6   3  -3   61.89    3.90 
   6   3  -3   64.99    3.50 
   6   3  -3   61.89    3.70 
   6   3  -3   63.29    3.00 
   6   3  -3   59.29    3.40 
  -6  -3   3   59.09    3.70 
   5   3  -3   71.89    3.60 
   5   3  -3   74.19    3.40 
   5   3  -3   68.49    3.60 
   5   3  -3   76.89    4.00 
   5   3  -3   70.69    3.30 
   5   3  -3   73.79    4.10 
   5   3  -3   76.19    3.70 
   5   3  -3   77.99    4.00 
  -5  -3   3   75.99    3.60 
   4   3  -3  249.38    9.50 
  -4  -3   3  257.07    9.80 
  -4  -3   3  254.27    9.30 
   3   3  -3  158.58    6.30 
  -3  -3   3  174.68    6.70 
  -3  -3   3  172.08    6.20 
  -3  -3   3  171.98    6.80 
  -3  -3   3  166.18    6.50 
  -3  -3   3  154.48    6.40 
   2   3  -3  619.64   22.20 
   2   3  -3  579.44   22.00 
   2   3  -3  596.74   21.90 
   2   3  -3  614.04   22.20 
   2   3  -3  647.54   22.10 
  -2  -3   3  655.33   22.90 
  -2  -3   3  656.53   22.40 
  -2  -3   3  615.24   22.30 
  -2  -3   3  583.84   22.00 
  -2  -3   3  656.93   22.00 
  -2  -3   3  610.64   22.20 
   1   3  -3  285.27   10.00 
   1   3  -3  276.87   10.00 
   1   3  -3  275.07   10.20 
   1   3  -3  271.67   11.10 
   1   3  -3  285.07   10.20 
   1   3  -3  268.17   10.00 
   1   3  -3  270.37   10.20 
  -1  -3   3  285.67   10.30 
  -1  -3   3  293.77   11.10 
  -1  -3   3  263.87   10.00 
  -1  -3   3  274.57   10.00 
  -1  -3   3  284.97    9.90 
  -1  -3   3  283.87   10.40 
  -1  -3   3  272.57   10.20 
  -1  -3   3  247.88   10.10 
   0   3  -3  189.18    8.30 
   0   3  -3  189.58    7.40 
   0   3  -3  191.88    7.10 
   0   3  -3  181.88    6.90 
   0   3  -3  189.48    6.80 
   0   3  -3  182.28    7.10 
   0   3  -3  186.08    6.90 
   0   3  -3  204.48    7.60 
   0   3  -3  182.18    7.20 
   0  -3   3  195.48    7.40 
   0  -3   3  183.98    7.00 
   0  -3   3  187.48    7.10 
   0  -3   3  180.08    8.00 
   0  -3   3  184.08    7.00 
   0  -3   3  175.48    7.10 
   0  -3   3  174.68    6.90 
   0  -3   3  185.58    6.80 
   0  -3   3  182.18    6.80 
   0  -3   3  180.88    7.10 
  -1   3  -3  433.06   15.50 
  -1   3  -3  442.36   15.80 
  -1   3  -3  424.86   15.90 
  -1   3  -3  426.26   15.40 
  -1   3  -3  404.26   15.20 
  -1   3  -3  423.46   15.20 
  -1   3  -3  406.36   15.20 
  -1   3  -3  433.86   16.90 
  -1   3  -3  434.46   15.20 
   1  -3   3  417.86   15.30 
   1  -3   3  423.96   15.30 
   1  -3   3  410.66   15.20 
   1  -3   3  434.06   15.70 
   1  -3   3  421.16   15.60 
   1  -3   3  391.46   14.90 
   1  -3   3  435.26   15.40 
   1  -3   3  417.66   14.90 
   1  -3   3  398.76   15.20 
   1  -3   3  419.36   16.50 
  -2   3  -3  361.46   14.00 
  -2   3  -3  389.86   13.90 
  -2   3  -3  347.97   13.50 
  -2   3  -3  363.66   13.80 
  -2   3  -3  357.86   14.40 
  -2   3  -3  393.36   13.90 
  -2   3  -3  356.46   13.60 
  -2   3  -3  364.46   15.40 
  -2   3  -3  371.36   13.60 
  -2   3  -3  366.36   13.60 
   2  -3   3  382.56   13.70 
   2  -3   3  360.16   15.00 
   2  -3   3  393.86   13.60 
   2  -3   3  374.56   13.70 
   2  -3   3  366.66   14.10 
   2  -3   3  377.06   14.10 
  -3   3  -3   91.79    4.20 
  -3   3  -3   89.49    5.70 
  -3   3  -3   91.39    3.90 
  -3   3  -3   86.09    4.20 
  -3   3  -3   88.19    4.10 
  -3   3  -3   92.99    4.40 
  -3   3  -3   93.09    4.40 
  -3   3  -3   91.19    4.20 
  -3   3  -3   87.69    4.50 
  -3   3  -3   89.79    4.20 
  -3   3  -3   83.29    4.90 
   3  -3   3   92.09    4.60 
   3  -3   3   93.49    4.00 
   3  -3   3   93.59    4.10 
   3  -3   3  103.99    4.70 
   3  -3   3  102.69    4.50 
   3  -3   3   91.79    4.20 
   3  -3   3   85.49    4.60 
   3  -3   3   93.89    4.20 
  -4   3  -3  649.43   25.30 
  -4   3  -3  687.13   24.70 
  -4   3  -3  703.63   25.40 
  -4   3  -3  743.03   25.70 
  -4   3  -3  690.73   25.10 
  -4   3  -3  688.83   25.40 
  -4   3  -3  740.73   25.70 
  -4   3  -3  688.03   25.30 
  -4   3  -3  711.53   24.90 
   4  -3   3  693.43   25.30 
   4  -3   3  724.73   25.70 
   4  -3   3  617.34   26.30 
   4  -3   3  704.53   25.40 
   4  -3   3  690.93   25.20 
   4  -3   3  665.13   25.10 
   4  -3   3  716.13   25.20 
  -5   3  -3  372.96   15.20 
  -5   3  -3  381.96   14.70 
  -5   3  -3  409.56   14.50 
  -5   3  -3  385.66   15.30 
  -5   3  -3  415.36   15.60 
  -5   3  -3  394.06   14.90 
  -5   3  -3  401.86   15.20 
  -5   3  -3  399.26   15.50 
   5  -3   3  406.66   15.30 
   5  -3   3  404.46   15.10 
   5  -3   3  396.96   15.10 
   5  -3   3  396.86   15.50 
   5  -3   3  398.96   15.20 
   5  -3   3  389.76   14.90 
  -6   3  -3  502.55   18.70 
  -6   3  -3  475.55   18.10 
  -6   3  -3  504.15   18.00 
  -6   3  -3  505.45   18.50 
  -6   3  -3  497.65   19.10 
  -6   3  -3  491.15   19.00 
   6  -3   3  513.55   18.70 
   6  -3   3  477.85   18.40 
   6  -3   3  493.25   19.00 
   6  -3   3  515.25   18.60 
   6  -3   3  497.75   18.90 
   6  -3   3  491.05   19.00 
  -7   3  -3   31.10    2.50 
  -7   3  -3   28.60    2.20 
  -7   3  -3   26.10    1.80 
   7  -3   3   30.10    2.20 
   7  -3   3   28.80    2.40 
   7  -3   3   24.40    2.40 
   7  -3   3   27.20    2.60 
  -8   3  -3   25.40    1.90 
   8  -3   3   25.90    2.10 
   9   2  -3   60.19    3.20 
   9   2  -3   61.79    3.50 
   9   2  -3   60.49    3.70 
   9   2  -3   57.79    3.40 
   8   2  -3  310.37   12.20 
   8   2  -3  301.47   11.70 
   8   2  -3  286.97   11.90 
   8   2  -3  279.17   11.50 
   8   2  -3  306.67   12.30 
   8   2  -3  319.37   12.50 
   7   2  -3   52.49    3.50 
   7   2  -3   47.40    2.90 
   7   2  -3   45.20    3.70 
   7   2  -3   50.89    3.10 
   7   2  -3   47.20    3.00 
   7   2  -3   46.70    3.40 
   7   2  -3   41.80    3.40 
   6   2  -3   30.10    2.60 
   6   2  -3   23.30    2.50 
   6   2  -3   22.10    2.00 
   6   2  -3   27.20    2.20 
   6   2  -3   23.20    2.10 
   6   2  -3   23.60    2.50 
   6   2  -3   20.80    2.30 
   6   2  -3   27.50    2.00 
  -6  -2   3   25.80    2.50 
   5   2  -3  115.89    5.50 
   5   2  -3  119.09    5.40 
   5   2  -3  116.79    6.10 
   5   2  -3  120.19    4.90 
   5   2  -3  113.49    5.50 
   5   2  -3  117.39    5.10 
   5   2  -3  113.39    5.00 
  -5  -2   3  117.49    5.40 
  -5  -2   3  114.89    6.10 
   4   2  -3   71.79    3.10 
  -4  -2   3   69.49    2.90 
   3   2  -3  465.45   17.00 
  -3  -2   3  473.85   17.10 
  -3  -2   3  493.15   16.90 
  -3  -2   3  476.15   17.30 
  -3  -2   3  473.65   16.90 
   2   2  -3  275.07   10.40 
   2   2  -3  268.87   10.40 
   2   2  -3  300.07   10.40 
  -2  -2   3  306.17   10.30 
  -2  -2   3  272.07   10.30 
  -2  -2   3  297.67   10.60 
  -2  -2   3  296.37   10.70 
  -2  -2   3  264.47   10.40 
   1   2  -3    3.40    0.40 
   1   2  -3    3.50    0.60 
   1   2  -3    3.10    0.60 
  -1  -2   3    2.40    0.60 
  -1  -2   3    4.50    0.60 
  -1  -2   3    3.10    0.40 
  -1  -2   3    3.00    0.80 
  -1  -2   3    4.30    0.90 
  -1  -2   3    5.60    0.70 
   0   2  -3  231.68    8.20 
   0   2  -3  223.78    8.70 
   0   2  -3  213.28    8.10 
   0   2  -3  218.08    8.30 
   0   2  -3  234.88    8.40 
   0   2  -3  213.88    8.40 
   0   2  -3  231.78    9.20 
   0   2  -3  227.18    8.10 
   0  -2   3  233.68    8.30 
   0  -2   3  228.68    8.40 
   0  -2   3  236.98    8.60 
   0  -2   3  241.08    8.10 
   0  -2   3  242.98    9.10 
   0  -2   3  219.98    8.40 
   0  -2   3  216.28    8.40 
   0  -2   3  217.18    8.30 
  -1   2  -3 1775.82   61.89 
  -1   2  -3 1789.72   61.39 
  -1   2  -3 1670.33   61.49 
  -1   2  -3 1679.93   61.59 
  -1   2  -3 1705.03   61.49 
  -1   2  -3 1810.92   61.79 
  -1   2  -3 1710.83   61.59 
  -1   2  -3 1832.12   62.89 
  -1   2  -3 1775.12   61.69 
  -1   2  -3 1781.62   61.99 
   1  -2   3 1712.03   61.59 
   1  -2   3 1744.83   61.59 
   1  -2   3 1733.93   61.59 
   1  -2   3 1863.71   61.69 
   1  -2   3 1805.32   62.59 
   1  -2   3 1827.82   61.89 
   1  -2   3 1749.53   61.29 
   1  -2   3 1806.92   61.89 
   1  -2   3 1686.53   61.59 
  -2   2  -3  668.53   24.50 
  -2   2  -3  672.53   24.30 
  -2   2  -3  685.93   24.00 
  -2   2  -3  692.53   24.60 
  -2   2  -3  685.43   25.00 
  -2   2  -3  711.93   24.60 
  -2   2  -3  693.83   24.80 
  -2   2  -3  653.93   24.30 
  -2   2  -3  713.63   25.90 
  -2   2  -3  681.53   24.30 
   2  -2   3  709.83   24.80 
   2  -2   3  684.13   25.50 
   2  -2   3  719.03   24.40 
   2  -2   3  670.43   24.40 
   2  -2   3  689.43   24.40 
   2  -2   3  698.53   24.50 
   2  -2   3  642.24   24.00 
   2  -2   3  731.93   24.80 
   2  -2   3  607.94   24.10 
  -3   2  -3  165.78    6.90 
  -3   2  -3  187.38    7.20 
  -3   2  -3  173.68    7.20 
  -3   2  -3  174.58    8.50 
  -3   2  -3  178.98    7.00 
  -3   2  -3  187.18    6.80 
  -3   2  -3  183.58    7.90 
  -3   2  -3  180.18    7.30 
  -3   2  -3  172.78    7.00 
  -3   2  -3  168.48    7.40 
   3  -2   3  177.38    7.00 
   3  -2   3  179.28    8.20 
   3  -2   3  193.58    7.20 
   3  -2   3  188.18    6.90 
   3  -2   3  194.08    7.60 
  -4   2  -3   11.60    1.40 
  -4   2  -3   11.40    1.30 
  -4   2  -3   13.40    1.80 
  -4   2  -3    9.40    2.00 
  -4   2  -3   12.40    1.40 
  -4   2  -3   11.70    1.60 
  -4   2  -3    9.70    1.00 
  -4   2  -3   11.70    1.60 
  -4   2  -3   11.60    1.70 
  -4   2  -3   10.80    1.60 
  -4   2  -3   12.40    1.20 
   4  -2   3   12.00    1.40 
   4  -2   3   10.30    1.70 
   4  -2   3   10.50    1.20 
   4  -2   3    9.90    1.50 
   4  -2   3   11.20    1.40 
   4  -2   3    9.30    1.20 
   4  -2   3   13.00    1.80 
   4  -2   3   11.60    1.70 
   4  -2   3   12.40    1.50 
  -5   2  -3   75.29    3.80 
  -5   2  -3   90.59    4.50 
  -5   2  -3   82.09    4.10 
  -5   2  -3   84.69    3.60 
  -5   2  -3   84.19    4.40 
  -5   2  -3   76.69    4.10 
  -5   2  -3   80.99    4.10 
  -5   2  -3   85.59    3.80 
   5  -2   3   87.29    4.20 
   5  -2   3   86.39    4.50 
   5  -2   3   81.49    4.00 
   5  -2   3   84.29    4.20 
   5  -2   3   79.49    4.40 
   5  -2   3   85.19    3.90 
   5  -2   3   84.29    4.00 
  -6   2  -3   33.00    2.70 
  -6   2  -3   31.90    2.60 
  -6   2  -3   35.00    3.00 
  -6   2  -3   33.00    2.40 
  -6   2  -3   33.10    2.10 
  -6   2  -3   36.10    2.30 
  -6   2  -3   33.90    3.00 
   6  -2   3   34.80    3.20 
   6  -2   3   32.60    2.80 
   6  -2   3   29.80    2.50 
   6  -2   3   36.80    2.50 
   6  -2   3   27.30    3.00 
   6  -2   3   32.10    2.40 
   6  -2   3   39.70    3.40 
  -7   2  -3    0.70    1.30 
  -7   2  -3    2.70    0.90 
  -7   2  -3    2.10    1.30 
  -7   2  -3    2.60    1.00 
  -7   2  -3    0.50    1.10 
  -7   2  -3    1.50    1.10 
  -7   2  -3    0.70    1.00 
   7  -2   3    1.50    1.50 
   7  -2   3    2.40    1.20 
   7  -2   3    2.40    1.40 
   7  -2   3    1.70    1.10 
   7  -2   3    1.90    1.20 
  -8   2  -3    0.90    0.90 
  -8   2  -3    1.20    0.70 
  -8   2  -3    0.90    1.00 
  -8   2  -3    0.00    0.90 
  -8   2  -3    1.10    0.80 
   8  -2   3    1.00    1.20 
   8  -2   3    0.50    1.20 
   8  -2   3    0.80    0.90 
   8  -2   3    0.40    0.90 
   9   1  -3    9.50    1.50 
   9   1  -3   10.40    1.70 
   9   1  -3    7.60    1.40 
   9   1  -3   11.90    1.40 
   8   1  -3  157.18    7.00 
   8   1  -3  162.68    6.80 
   8   1  -3  149.88    7.10 
   8   1  -3  142.99    6.90 
   8   1  -3  161.18    7.40 
   7   1  -3  210.88    9.20 
   7   1  -3  199.88    9.00 
   7   1  -3  206.08    8.90 
   7   1  -3  211.98    8.70 
   7   1  -3  218.78    9.50 
   7   1  -3  201.18    8.50 
   7   1  -3  215.18    9.10 
   6   1  -3  481.15   18.50 
   6   1  -3  483.45   18.00 
   6   1  -3  496.45   18.70 
   6   1  -3  477.85   18.30 
   6   1  -3  478.75   18.40 
   6   1  -3  462.45   18.20 
   6   1  -3  500.55   17.90 
  -6  -1   3  470.15   18.30 
   5   1  -3   30.70    2.70 
   5   1  -3   30.10    2.00 
   5   1  -3   29.70    2.40 
   5   1  -3   34.20    2.00 
   5   1  -3   36.40    2.60 
   5   1  -3   31.10    2.30 
   5   1  -3   35.40    2.50 
   5   1  -3   29.10    2.20 
  -5  -1   3   35.70    3.00 
  -5  -1   3   34.00    2.30 
  -5  -1   3   30.90    2.40 
   4   1  -3  469.65   16.90 
  -4  -1   3  471.25   18.10 
  -4  -1   3  455.65   17.30 
  -4  -1   3  473.15   16.60 
  -4  -1   3  466.85   17.20 
   3   1  -3  386.86   13.80 
  -3  -1   3  382.76   14.60 
  -3  -1   3  379.76   14.10 
   2   1  -3   12.10    0.90 
  -2  -1   3   12.60    0.70 
  -2  -1   3   12.60    1.00 
  -2  -1   3   12.40    1.10 
  -2  -1   3   11.70    0.80 
   1   1  -3  945.21   35.40 
   1   1  -3 1064.69   35.20 
  -1  -1   3  949.11   35.20 
  -1  -1   3 1066.09   35.50 
  -1  -1   3 1035.30   35.30 
  -1  -1   3 1042.00   35.50 
  -1  -1   3  950.60   35.30 
  -1  -1   3  977.40   35.50 
   0   1  -3  669.43   24.00 
   0   1  -3  725.53   23.70 
   0   1  -3  687.33   23.90 
   0   1  -3  641.24   23.50 
   0   1  -3  692.33   24.30 
   0  -1   3  698.53   24.20 
   0  -1   3  628.64   23.60 
   0  -1   3  669.53   23.80 
   0  -1   3  674.73   23.90 
   0  -1   3  639.94   23.90 
  -1   1  -3  627.64   22.40 
  -1   1  -3  601.54   21.70 
  -1   1  -3  573.84   21.80 
  -1   1  -3  579.94   21.40 
  -1   1  -3  635.34   21.40 
  -1   1  -3  595.74   21.40 
  -1   1  -3  598.44   21.60 
   1  -1   3  639.14   21.70 
   1  -1   3  586.74   21.30 
   1  -1   3  624.54   21.60 
   1  -1   3  600.24   21.70 
   1  -1   3  647.84   22.30 
  -2   1  -3 2358.16   78.59 
  -2   1  -3 2185.38   77.49 
  -2   1  -3 2161.18   77.39 
  -2   1  -3 2259.07   77.89 
  -2   1  -3 2239.28   77.39 
  -2   1  -3 2283.87   77.79 
  -2   1  -3 2331.87   77.59 
  -2   1  -3 2142.59   77.49 
   2  -1   3 2315.67   77.59 
   2  -1   3 2344.47   77.69 
   2  -1   3 2378.46   78.39 
   2  -1   3 2148.29   77.39 
   2  -1   3 2053.79   77.29 
   2  -1   3 2195.28   77.39 
   2  -1   3 2198.18   77.39 
   2  -1   3 2227.18   77.79 
   2  -1   3 2162.88   77.49 
   2  -1   3 1931.11   77.19 
  -3   1  -3  255.37    9.70 
  -3   1  -3  275.57   11.10 
  -3   1  -3  255.07    9.80 
  -3   1  -3  261.07    9.70 
  -3   1  -3  270.67   10.10 
  -3   1  -3  258.47    9.90 
  -3   1  -3  270.57    9.90 
  -3   1  -3  261.37   10.40 
   3  -1   3  258.37    9.60 
   3  -1   3  269.47    9.80 
   3  -1   3  267.67   10.00 
   3  -1   3  266.37   10.20 
   3  -1   3  253.77   10.70 
   3  -1   3  249.38    9.60 
   3  -1   3  263.77    9.80 
   3  -1   3  246.58    9.60 
   3  -1   3  271.87    9.90 
  -4   1  -3  349.07   12.90 
  -4   1  -3  363.76   13.40 
  -4   1  -3  346.47   13.10 
  -4   1  -3  343.67   13.30 
  -4   1  -3  340.17   14.10 
  -4   1  -3  369.86   13.40 
  -4   1  -3  352.76   13.20 
  -4   1  -3  362.06   14.70 
  -4   1  -3  345.27   13.60 
   4  -1   3  374.86   13.30 
   4  -1   3  351.96   13.00 
   4  -1   3  369.96   13.80 
   4  -1   3  354.86   13.00 
  -5   1  -3  385.56   12.90 
  -5   1  -3  363.66   13.50 
  -5   1  -3  338.57   13.30 
  -5   1  -3  333.87   13.30 
  -5   1  -3  333.77   12.70 
  -5   1  -3  304.57   15.30 
  -5   1  -3  342.07   13.00 
  -5   1  -3  346.17   13.00 
  -5   1  -3  351.26   13.50 
  -5   1  -3  358.06   13.70 
   5  -1   3  374.26   13.40 
   5  -1   3  351.06   13.20 
   5  -1   3  363.16   13.10 
   5  -1   3  347.57   13.40 
   5  -1   3  362.36   13.60 
   5  -1   3  350.46   13.30 
   5  -1   3  350.56   12.90 
   5  -1   3  340.07   13.10 
   5  -1   3  348.97   13.20 
   5  -1   3  348.07   13.60 
  -6   1  -3   82.69    3.70 
  -6   1  -3   78.19    3.80 
  -6   1  -3   76.79    3.50 
  -6   1  -3   77.69    4.10 
  -6   1  -3   76.89    4.00 
  -6   1  -3   83.39    4.50 
  -6   1  -3   82.49    4.40 
   6  -1   3   79.49    4.00 
   6  -1   3   74.59    3.80 
   6  -1   3   82.29    4.10 
   6  -1   3   75.69    4.40 
   6  -1   3   80.19    4.00 
   6  -1   3   77.99    3.90 
   6  -1   3   74.89    3.90 
   6  -1   3   79.59    4.30 
   6  -1   3   75.79    4.40 
   6  -1   3   78.09    4.00 
   6  -1   3   80.09    4.60 
  -7   1  -3  259.47   10.80 
  -7   1  -3  255.07   10.70 
  -7   1  -3  257.67   10.10 
  -7   1  -3  263.17    9.90 
  -7   1  -3  247.28   10.20 
  -7   1  -3  266.77    9.80 
   7  -1   3  248.28   10.80 
   7  -1   3  258.77   10.70 
   7  -1   3  265.17   10.40 
   7  -1   3  270.07   11.00 
   7  -1   3  261.97   11.00 
   7  -1   3  263.87   10.90 
   7  -1   3  237.08   10.20 
   7  -1   3  247.68   10.10 
   7  -1   3  269.07   10.40 
  -8   1  -3  127.39    5.90 
  -8   1  -3  152.78    5.80 
  -8   1  -3  146.89    5.90 
   8  -1   3  140.99    6.60 
   8  -1   3  147.89    6.80 
   8  -1   3  145.39    6.80 
   8  -1   3  145.49    6.20 
   8  -1   3  139.29    6.10 
   8  -1   3  136.29    6.60 
  -9   1  -3   75.99    3.60 
  -9   1  -3   76.19    3.20 
   9  -1   3   75.69    3.80 
   9  -1   3   69.59    3.70 
   9   0  -3    2.20    1.00 
   9   0  -3    1.20    1.30 
   8   0  -3  549.74   19.30 
   8   0  -3  528.35   19.90 
   8   0  -3  500.15   19.30 
   8   0  -3  551.44   19.80 
  -8   0   3  481.05   18.50 
   7   0  -3  183.08    8.30 
   7   0  -3  178.48    7.80 
   7   0  -3  192.28    8.00 
   7   0  -3  193.48    8.40 
   7   0  -3  195.58    8.70 
   7   0  -3  193.88    8.80 
   6   0  -3   54.49    3.80 
   6   0  -3   46.70    3.20 
   6   0  -3   52.69    3.20 
   6   0  -3   48.30    3.80 
   6   0  -3   51.49    3.80 
   6   0  -3   55.39    3.60 
   6   0  -3   54.29    3.50 
   6   0  -3   55.19    3.10 
  -6   0   3   54.29    3.20 
   5   0  -3   64.19    3.10 
   5   0  -3   64.79    3.90 
   5   0  -3   64.59    3.30 
   5   0  -3   61.89    3.60 
   5   0  -3   60.69    3.50 
   5   0  -3   58.89    3.30 
   5   0  -3   56.99    3.50 
   5   0  -3   61.29    3.70 
  -5   0   3   64.59    3.40 
   4   0  -3  177.38    6.70 
  -4   0   3  169.68    6.90 
  -4   0   3  165.68    7.80 
   3   0  -3 1181.28   41.70 
   3   0  -3 1163.38   41.50 
  -3   0   3 1202.98   42.50 
  -3   0   3 1144.59   41.60 
  -3   0   3 1209.68   41.70 
   2   0  -3   68.19    2.70 
   2   0  -3   72.99    3.00 
  -2   0   3   66.79    3.30 
   1   0  -3 2766.62   96.19 
   1   0  -3 2603.64   96.09 
   1   0  -3 2863.31   95.69 
  -1   0   3 2723.33   97.19 
  -1   0   3 2581.14   95.29 
  -1   0   3 2729.73   95.49 
  -1   0   3 2864.61   97.29 
  -1   0   3 2822.82   96.49 
  -1   0   3 2675.33   96.89 
   0   0  -3   51.09    2.20 
   0   0  -3   52.59    2.10 
   0   0  -3   50.19    2.40 
   0   0  -3   47.30    2.30 
   0   0  -3   49.10    2.20 
   0   0   3   57.49    2.40 
   0   0   3   46.60    1.80 
   0   0   3   59.29    2.30 
   0   0   3   49.80    1.80 
   0   0   3   47.80    2.40 
   0   0   3   51.89    2.30 
   0   0   3   50.49    2.40 
  -1   0  -3 7846.12  279.67 
  -1   0  -3 8254.87  278.17 
  -1   0  -3 8100.59  282.37 
  -1   0  -3 8051.79  279.17 
   1   0   3 7378.16  277.77 
   1   0   3 8289.37  281.97 
   1   0   3 7975.80  278.97 
   1   0   3 8272.87  279.67 
   1   0   3 7523.65  279.37 
  -2   0  -3   77.09    3.40 
  -2   0  -3   77.09    3.30 
   2   0   3   80.69    3.30 
   2   0   3   74.79    3.40 
   2   0   3   79.09    3.80 
   2   0   3   80.89    3.30 
  -3   0  -3 3516.35  121.09 
  -3   0  -3 3375.06  119.99 
  -3   0  -3 3431.46  121.59 
  -3   0  -3 3615.54  121.39 
  -3   0  -3 3555.44  121.79 
   3   0   3 3278.17  120.09 
   3   0   3 3521.45  120.09 
   3   0   3 3492.15  120.29 
   3   0   3 3278.97  119.99 
   3   0   3 3396.46  119.99 
   3   0   3 3339.47  120.79 
   3   0   3 3508.55  120.69 
  -4   0  -3 1024.50   35.50 
  -4   0  -3  983.30   36.20 
  -4   0  -3 1026.80   36.60 
  -4   0  -3 1022.40   35.70 
  -4   0  -3  978.80   34.90 
  -4   0  -3  995.80   35.20 
   4   0   3 1015.80   35.70 
   4   0   3 1014.70   35.30 
   4   0   3  908.01   36.10 
   4   0   3  975.00   35.10 
   4   0   3 1015.70   35.30 
   4   0   3  945.11   35.00 
   4   0   3 1034.00   35.40 
  -5   0  -3 1038.20   37.10 
  -5   0  -3 1008.00   38.50 
  -5   0  -3 1055.79   37.40 
  -5   0  -3 1002.70   38.60 
  -5   0  -3 1033.30   37.30 
  -5   0  -3 1019.80   37.40 
  -5   0  -3 1066.59   36.80 
  -5   0  -3 1039.20   37.70 
   5   0   3 1079.89   37.20 
   5   0   3 1042.70   37.20 
   5   0   3 1046.50   37.00 
   5   0   3 1085.99   37.80 
  -6   0  -3   21.10    1.80 
  -6   0  -3   20.10    2.30 
  -6   0  -3   17.80    1.40 
  -6   0  -3   19.00    1.90 
  -6   0  -3   19.20    1.80 
  -6   0  -3   19.30    1.60 
  -6   0  -3   19.90    1.60 
  -6   0  -3   23.90    2.20 
  -6   0  -3   16.00    2.00 
   6   0   3   20.30    1.90 
   6   0   3   21.20    1.90 
   6   0   3   17.50    1.70 
   6   0   3   21.70    2.30 
   6   0   3   18.70    2.00 
   6   0   3   17.20    2.20 
   6   0   3   21.20    1.80 
   6   0   3   17.20    1.70 
   6   0   3   19.40    2.10 
   6   0   3   20.20    1.80 
   6   0   3   16.90    1.60 
  -7   0  -3  319.97   11.90 
  -7   0  -3  348.97   12.20 
  -7   0  -3  325.97   13.00 
  -7   0  -3  311.47   12.20 
  -7   0  -3  313.77   12.90 
   7   0   3  333.07   13.00 
   7   0   3  338.57   13.30 
   7   0   3  327.17   13.10 
   7   0   3  322.87   12.60 
   7   0   3  300.37   12.90 
   7   0   3  317.57   12.40 
   7   0   3  316.77   12.80 
   7   0   3  308.27   12.40 
   7   0   3  330.27   12.50 
  -8   0  -3  118.49    4.90 
  -8   0  -3  113.89    5.80 
  -8   0  -3  111.99    4.70 
  -8   0  -3  112.29    5.80 
   8   0   3  104.59    5.20 
   8   0   3  111.89    5.90 
   8   0   3  125.49    6.10 
   8   0   3  105.89    5.70 
   8   0   3  115.39    5.70 
   8   0   3  113.89    5.30 
   8   0   3  100.69    5.10 
  -9   0  -3  101.19    4.30 
  -9   0  -3   96.69    4.10 
  -9   0  -3  107.49    4.70 
   9   0   3   93.19    4.50 
   9   0   3   90.69    4.90 
   9   0   3  100.99    5.10 
   9   0   3  101.79    5.20 
   9   0   3   98.69    4.60 
   9   0   3   93.09    4.90 
   8  -1  -3   10.50    1.60 
   8  -1  -3    6.50    1.40 
   8  -1  -3    9.20    1.70 
   8  -1  -3    8.30    1.60 
   8  -1  -3    8.80    1.30 
   7  -1  -3   59.39    3.50 
   7  -1  -3   68.19    4.40 
   7  -1  -3   57.89    3.70 
   7  -1  -3   58.19    4.00 
   7  -1  -3   49.99    3.30 
   7  -1  -3   59.09    4.10 
  -7   1   3   60.49    3.70 
  -7   1   3   55.99    2.60 
   6  -1  -3  168.48    7.30 
   6  -1  -3  169.28    7.60 
   6  -1  -3  179.68    7.90 
   6  -1  -3  168.38    7.50 
   6  -1  -3  178.68    7.50 
   6  -1  -3  186.88    8.20 
   6  -1  -3  166.48    8.00 
  -6   1   3  162.58    7.50 
   5  -1  -3  826.02   30.70 
   5  -1  -3  819.32   30.60 
   5  -1  -3  866.21   31.20 
   5  -1  -3  851.71   30.50 
   5  -1  -3  877.81   30.40 
   5  -1  -3  850.11   30.90 
   5  -1  -3  865.51   31.20 
   5  -1  -3  813.42   30.30 
  -5   1   3  851.91   30.60 
  -5   1   3  800.52   30.60 
  -5   1   3  854.51   30.70 
   4  -1  -3  163.88    6.40 
   4  -1  -3  148.39    8.30 
   4  -1  -3  152.28    6.90 
   4  -1  -3  161.88    6.80 
   4  -1  -3  153.18    6.50 
  -4   1   3  158.18    6.60 
  -4   1   3  154.88    7.60 
  -4   1   3  162.08    6.50 
   3  -1  -3  455.55   16.70 
   3  -1  -3  460.25   16.90 
  -3   1   3  476.35   16.90 
  -3   1   3  461.95   17.80 
   2  -1  -3  732.13   27.10 
   2  -1  -3  761.42   26.90 
   2  -1  -3  779.62   27.30 
  -2   1   3  801.62   27.20 
  -2   1   3  766.12   27.20 
  -2   1   3  783.72   27.90 
  -2   1   3  742.53   27.00 
   1  -1  -3  445.36   15.10 
   1  -1  -3  397.46   15.00 
   1  -1  -3  434.56   14.80 
  -1   1   3  424.26   15.30 
  -1   1   3  427.56   14.90 
  -1   1   3  438.86   15.20 
  -1   1   3  392.66   15.10 
  -1   1   3  391.26   14.90 
   0  -1  -3 2853.61   94.69 
   0  -1  -3 2677.93   96.39 
   0  -1  -3 2443.86   93.99 
   0  -1  -3 2776.72   94.49 
   0   1   3 2680.33   94.49 
   0   1   3 2705.13   93.99 
   0   1   3 2853.61   95.69 
   0   1   3 2586.04   94.99 
   0   1   3 2540.15   94.09 
   0   1   3 2835.22   96.79 
  -1  -1  -3  760.92   26.90 
  -1  -1  -3  728.13   27.00 
  -1  -1  -3  767.22   26.90 
  -1  -1  -3  808.42   26.90 
  -1  -1  -3  788.32   27.50 
  -1  -1  -3  744.43   27.00 
   1   1   3  786.12   27.40 
   1   1   3  748.23   26.80 
   1   1   3  793.52   27.00 
   1   1   3  734.33   27.10 
   1   1   3  770.42   27.00 
  -2  -1  -3 2154.18   78.89 
  -2  -1  -3 2185.78   79.89 
  -2  -1  -3 2248.38   78.59 
  -2  -1  -3 2329.77   94.29 
   2   1   3 2185.18   78.39 
   2   1   3 2287.77   78.59 
   2   1   3 2298.07   79.29 
   2   1   3 2284.77   79.69 
  -3  -1  -3  998.30   34.10 
  -3  -1  -3  975.80   34.30 
  -3  -1  -3 1003.20   34.90 
  -3  -1  -3  957.20   34.00 
   3   1   3  897.21   33.80 
   3   1   3  947.71   34.20 
   3   1   3  958.10   34.60 
   3   1   3  955.10   34.20 
   3   1   3  931.71   34.00 
   3   1   3 1002.50   33.90 
   3   1   3  985.10   34.00 
  -4  -1  -3  743.33   26.70 
  -4  -1  -3  768.12   27.30 
  -4  -1  -3  722.33   26.20 
  -4  -1  -3  752.32   26.40 
   4   1   3  715.63   26.00 
   4   1   3  747.73   26.40 
   4   1   3  753.82   26.50 
   4   1   3  706.13   26.90 
   4   1   3  744.93   26.30 
   4   1   3  727.63   26.10 
   4   1   3  707.93   26.20 
  -5  -1  -3  201.98    7.80 
  -5  -1  -3  205.38    9.10 
  -5  -1  -3  207.78    8.40 
  -5  -1  -3  205.48    7.50 
  -5  -1  -3  199.68    8.10 
   5   1   3  195.18    7.80 
   5   1   3  199.78    7.90 
   5   1   3  199.38    8.20 
   5   1   3  199.68    7.70 
  -6  -1  -3  335.57   11.90 
  -6  -1  -3  329.77   13.10 
  -6  -1  -3  342.17   12.40 
  -6  -1  -3  317.37   13.70 
  -6  -1  -3  317.17   12.70 
   6   1   3  304.67   12.30 
   6   1   3  311.67   12.50 
   6   1   3  353.36   12.90 
   6   1   3  331.77   12.20 
   6   1   3  325.77   12.40 
   6   1   3  320.47   12.30 
   6   1   3  331.47   12.80 
   6   1   3  312.27   12.70 
   6   1   3  332.67   12.40 
   6   1   3  323.47   12.30 
   6   1   3  321.77   12.30 
   6   1   3  318.37   12.60 
  -7  -1  -3    3.80    0.80 
  -7  -1  -3    3.30    1.40 
  -7  -1  -3    3.90    1.40 
  -7  -1  -3    2.40    1.10 
  -7  -1  -3    5.60    1.60 
  -7  -1  -3    4.50    1.00 
   7   1   3    5.70    1.70 
   7   1   3    5.00    1.50 
   7   1   3    2.80    1.30 
   7   1   3    2.50    1.00 
   7   1   3    3.70    1.40 
   7   1   3    2.90    1.10 
   7   1   3    5.20    1.20 
   7   1   3    4.40    1.20 
   7   1   3    3.90    1.10 
   7   1   3    4.90    1.40 
   7   1   3    4.90    1.20 
  -8  -1  -3  166.38    6.70 
  -8  -1  -3  169.58    6.80 
  -8  -1  -3  172.08    7.80 
  -8  -1  -3  166.38    7.60 
   8   1   3  159.28    7.10 
   8   1   3  166.48    7.70 
   8   1   3  175.78    8.00 
   8   1   3  166.98    7.20 
   8   1   3  178.08    8.00 
   8   1   3  171.98    7.30 
   8   1   3  172.78    7.30 
   8   1   3  166.98    7.80 
  -9  -1  -3   15.20    1.60 
  -9  -1  -3   12.30    1.60 
  -9  -1  -3   14.50    1.30 
   9   1   3   13.80    2.10 
   9   1   3   11.60    1.70 
   9   1   3   13.90    2.00 
   9   1   3   13.40    2.00 
   9   1   3   18.30    2.50 
 -10  -1  -3   74.49    3.50 
 -10  -1  -3   76.99    3.10 
  10   1   3   73.09    3.70 
  10   1   3   69.29    3.40 
  10   1   3   76.49    3.90 
  10   1   3   65.49    3.70 
   8  -2  -3   11.90    1.40 
   8  -2  -3   13.40    1.60 
   8  -2  -3   12.50    1.30 
   8  -2  -3   11.20    1.50 
  -8   2   3   13.70    1.30 
   7  -2  -3   42.50    3.40 
   7  -2  -3   34.10    2.80 
   7  -2  -3   43.00    2.90 
   7  -2  -3   39.40    3.30 
   7  -2  -3   43.50    3.30 
   7  -2  -3   42.60    3.00 
  -7   2   3   38.30    2.10 
   6  -2  -3  247.48   10.00 
   6  -2  -3  252.87   10.80 
   6  -2  -3  252.47   10.50 
   6  -2  -3  250.67   10.30 
   6  -2  -3  258.27   10.70 
   6  -2  -3  234.08   10.00 
  -6   2   3  237.18   10.20 
  -6   2   3  243.18    9.20 
   5  -2  -3  886.51   32.90 
   5  -2  -3  888.51   32.40 
   5  -2  -3  888.61   32.10 
   5  -2  -3  873.91   32.70 
   5  -2  -3  917.71   33.00 
   5  -2  -3  915.91   32.20 
   5  -2  -3  880.31   32.50 
   5  -2  -3  912.31   32.30 
  -5   2   3  879.71   32.30 
  -5   2   3  883.61   32.50 
  -5   2   3  874.41   31.40 
   4  -2  -3  101.49    4.80 
   4  -2  -3  102.29    5.10 
   4  -2  -3  103.39    4.70 
   4  -2  -3  104.29    4.50 
   4  -2  -3   97.29    5.10 
   4  -2  -3   90.89    4.70 
   4  -2  -3  101.89    4.50 
   4  -2  -3   99.19    5.00 
   4  -2  -3   96.09    4.70 
   4  -2  -3  102.09    4.80 
  -4   2   3  101.49    4.70 
  -4   2   3  107.99    4.80 
  -4   2   3   98.19    4.60 
   3  -2  -3  146.89    5.90 
   3  -2  -3  135.29    5.90 
  -3   2   3  156.08    6.10 
  -3   2   3  147.19    6.30 
  -3   2   3  141.69    7.00 
  -3   2   3  158.08    6.10 
  -3   2   3  142.39    5.90 
   2  -2  -3  115.69    4.90 
   2  -2  -3  114.19    4.50 
   2  -2  -3  121.89    4.80 
   2  -2  -3  119.09    4.90 
  -2   2   3  122.79    4.90 
  -2   2   3  124.19    4.90 
  -2   2   3  116.29    4.80 
  -2   2   3  122.69    5.70 
  -2   2   3  122.29    5.30 
   1  -2  -3 1058.59   36.60 
   1  -2  -3 1038.40   36.20 
   1  -2  -3 1023.50   36.40 
   1  -2  -3  991.90   36.30 
   1  -2  -3 1053.49   36.60 
   1  -2  -3 1018.50   36.50 
   1  -2  -3 1007.60   36.90 
  -1   2   3 1083.39   37.20 
  -1   2   3  983.70   36.50 
  -1   2   3 1024.20   36.50 
  -1   2   3 1072.99   36.50 
  -1   2   3 1088.79   37.10 
   0  -2  -3    0.30    0.40 
   0  -2  -3    0.50    0.30 
   0  -2  -3    2.30    0.80 
   0  -2  -3    0.30    0.50 
   0  -2  -3    0.30    0.50 
   0   2   3    0.40    0.50 
   0   2   3    0.50    0.70 
   0   2   3    0.30    0.70 
   0   2   3    0.20    0.50 
  -1  -2  -3 4551.24  156.88 
  -1  -2  -3 4307.27  157.18 
  -1  -2  -3 4554.94  160.08 
  -1  -2  -3 4229.18  156.38 
  -1  -2  -3 4417.76  156.18 
   1   2   3 4489.05  157.38 
   1   2   3 4628.04  160.58 
   1   2   3 4330.57  156.58 
   1   2   3 4614.24  156.88 
   1   2   3 4630.44  158.68 
  -2  -2  -3  899.11   30.80 
  -2  -2  -3  892.91   30.60 
  -2  -2  -3  867.51   30.80 
  -2  -2  -3  858.31   30.90 
  -2  -2  -3  865.71   31.50 
   2   2   3  881.01   30.70 
   2   2   3  922.61   31.50 
   2   2   3  817.02   30.80 
   2   2   3  920.71   30.70 
   2   2   3  843.62   30.70 
   2   2   3  867.41   30.80 
  -3  -2  -3 1920.91   62.69 
  -3  -2  -3 1760.82   62.29 
  -3  -2  -3 1821.32   62.89 
  -3  -2  -3 1916.21   63.49 
  -3  -2  -3 1750.72   62.49 
  -3  -2  -3 1699.03   62.39 
   3   2   3 1829.02   62.49 
   3   2   3 1823.22   62.89 
   3   2   3 1801.22   63.29 
   3   2   3 1756.82   62.59 
   3   2   3 1728.93   62.69 
   3   2   3 1766.22   62.39 
   3   2   3 1767.32   62.59 
   3   2   3 1697.63   62.59 
  -4  -2  -3  238.38    9.60 
  -4  -2  -3  226.38    8.50 
  -4  -2  -3  236.88    8.80 
  -4  -2  -3  237.08    9.00 
   4   2   3  222.68    8.40 
   4   2   3  229.78    8.70 
   4   2   3  222.28    8.70 
   4   2   3  228.28    8.40 
   4   2   3  231.88    8.50 
   4   2   3  221.38    9.20 
   4   2   3  221.28    8.50 
   4   2   3  212.78    8.40 
  -5  -2  -3  372.86   13.90 
  -5  -2  -3  385.96   15.10 
  -5  -2  -3  373.16   13.50 
  -5  -2  -3  385.36   14.50 
  -5  -2  -3  380.16   14.20 
   5   2   3  387.16   14.20 
   5   2   3  358.56   13.70 
   5   2   3  376.76   13.90 
   5   2   3  374.06   13.70 
   5   2   3  369.66   14.00 
  -6  -2  -3  151.78    7.60 
  -6  -2  -3  165.88    7.30 
  -6  -2  -3  164.38    6.50 
  -6  -2  -3  167.58    6.10 
  -6  -2  -3  161.68    6.90 
   6   2   3  158.58    6.50 
   6   2   3  147.69    6.80 
   6   2   3  152.28    6.80 
   6   2   3  155.88    6.40 
   6   2   3  166.68    6.40 
   6   2   3  149.88    6.50 
   6   2   3  147.39    6.30 
   6   2   3  157.88    6.50 
  -7  -2  -3  254.67   11.10 
  -7  -2  -3  283.07   10.80 
  -7  -2  -3  291.97   10.30 
  -7  -2  -3  271.77   11.60 
   7   2   3  289.07   10.70 
   7   2   3  266.57   11.20 
   7   2   3  267.67   10.70 
   7   2   3  275.87   10.90 
   7   2   3  278.37   10.80 
   7   2   3  267.57   11.10 
   7   2   3  279.07   10.70 
   7   2   3  274.07   11.20 
   7   2   3  270.47   11.30 
  -8  -2  -3  151.38    6.80 
  -8  -2  -3  153.08    7.70 
  -8  -2  -3  153.08    6.20 
  -8  -2  -3  159.78    6.40 
   8   2   3  159.18    7.30 
   8   2   3  164.38    7.50 
   8   2   3  157.98    6.90 
   8   2   3  160.58    6.80 
   8   2   3  153.68    7.30 
   8   2   3  159.48    6.90 
   8   2   3  154.88    7.40 
   8   2   3  158.28    6.70 
   8   2   3  154.18    6.70 
  -9  -2  -3  116.99    4.90 
  -9  -2  -3  114.19    5.80 
  -9  -2  -3  110.89    5.10 
  -9  -2  -3  108.29    4.70 
   9   2   3  114.89    5.90 
   9   2   3  112.99    5.30 
   9   2   3  120.09    6.00 
   9   2   3  101.99    5.10 
   9   2   3  114.79    5.90 
   9   2   3  105.89    5.10 
   9   2   3  112.39    5.70 
   9   2   3  122.69    5.40 
 -10  -2  -3    1.00    0.70 
 -10  -2  -3    0.40    0.60 
  10   2   3    1.80    1.20 
  10   2   3    0.60    1.10 
  10   2   3    0.60    1.20 
  10   2   3    0.90    1.10 
   7  -3  -3   25.50    2.40 
   7  -3  -3   28.80    2.80 
   7  -3  -3   26.40    2.50 
   7  -3  -3   29.90    2.70 
   7  -3  -3   24.90    2.10 
  -7   3   3   25.50    1.60 
   6  -3  -3   40.70    3.40 
   6  -3  -3   34.70    2.80 
   6  -3  -3   37.20    2.90 
   6  -3  -3   36.50    3.40 
   6  -3  -3   40.60    3.10 
   6  -3  -3   42.50    2.80 
   6  -3  -3   38.60    3.30 
  -6   3   3   36.10    2.00 
  -6   3   3   41.50    2.80 
  -6   3   3   37.60    2.20 
   5  -3  -3  666.63   24.40 
   5  -3  -3  692.23   25.20 
   5  -3  -3  656.53   24.60 
   5  -3  -3  679.33   24.60 
   5  -3  -3  655.83   24.20 
   5  -3  -3  641.74   24.60 
   5  -3  -3  660.33   25.00 
   5  -3  -3  672.93   24.90 
  -5   3   3  663.43   24.70 
  -5   3   3  675.13   23.70 
  -5   3   3  605.44   24.50 
   4  -3  -3  121.09    6.00 
   4  -3  -3  121.79    5.70 
   4  -3  -3  124.39    5.70 
   4  -3  -3  123.59    6.00 
   4  -3  -3  113.89    5.60 
   4  -3  -3  116.19    5.30 
   4  -3  -3  123.19    5.90 
   4  -3  -3  115.79    5.50 
   4  -3  -3  128.09    5.60 
  -4   3   3  126.39    5.80 
  -4   3   3  120.09    5.50 
  -4   3   3  119.69    4.80 
  -4   3   3  112.29    5.90 
  -4   3   3  125.99    5.70 
   3  -3  -3  200.68    8.00 
   3  -3  -3  193.08    7.80 
   3  -3  -3  204.58    8.30 
   3  -3  -3  194.58    7.90 
   3  -3  -3  201.18    8.20 
   3  -3  -3  200.08    8.50 
   3  -3  -3  209.98    8.30 
   3  -3  -3  188.58    8.10 
   3  -3  -3  189.28    8.30 
   3  -3  -3  196.78    8.10 
  -3   3   3  191.68    8.70 
  -3   3   3  203.98    8.10 
  -3   3   3  207.78    8.10 
  -3   3   3  189.98    7.30 
  -3   3   3  208.68    8.20 
  -3   3   3  195.08    7.90 
   2  -3  -3   58.09    2.80 
   2  -3  -3   53.79    2.40 
   2  -3  -3   52.99    2.80 
  -2   3   3   57.99    2.90 
  -2   3   3   58.99    2.90 
  -2   3   3   50.59    2.70 
  -2   3   3   53.19    2.30 
  -2   3   3   52.99    3.40 
  -2   3   3   57.99    2.90 
  -2   3   3   52.89    3.60 
   1  -3  -3  161.08    6.40 
   1  -3  -3  169.78    6.60 
   1  -3  -3  154.78    6.10 
   1  -3  -3  168.68    6.50 
  -1   3   3  169.98    7.40 
  -1   3   3  150.68    6.50 
  -1   3   3  169.78    6.60 
  -1   3   3  158.48    6.40 
  -1   3   3  170.58    6.50 
  -1   3   3  172.38    6.50 
  -1   3   3  168.58    7.30 
   0  -3  -3  652.93   23.80 
   0  -3  -3  681.63   24.20 
   0  -3  -3  668.83   24.90 
   0  -3  -3  663.53   23.90 
   0  -3  -3  686.53   23.90 
   0  -3  -3  680.03   24.20 
   0  -3  -3  700.83   24.30 
   0   3   3  685.33   24.20 
   0   3   3  703.53   24.90 
   0   3   3  653.53   24.10 
   0   3   3  701.03   24.20 
   0   3   3  625.14   24.00 
   0   3   3  711.13   25.10 
   0   3   3  702.83   24.20 
  -1  -3  -3  227.88    9.00 
  -1  -3  -3  220.68    8.00 
  -1  -3  -3  221.88    8.30 
  -1  -3  -3  208.28    7.90 
  -1  -3  -3  216.98    8.10 
  -1  -3  -3  224.88    8.00 
   1   3   3  224.58    8.10 
   1   3   3  235.18    9.10 
   1   3   3  209.18    8.20 
   1   3   3  212.18    8.40 
   1   3   3  232.28    8.80 
   1   3   3  230.38    8.20 
   1   3   3  218.68    8.20 
   1   3   3  223.08    8.20 
  -2  -3  -3  841.52   28.60 
  -2  -3  -3  786.02   28.60 
  -2  -3  -3  792.92   28.80 
  -2  -3  -3  823.22   28.70 
  -2  -3  -3  827.22   29.60 
  -2  -3  -3  828.72   28.80 
   2   3   3  795.02   28.70 
   2   3   3  852.41   29.70 
   2   3   3  874.61   29.40 
   2   3   3  812.32   28.70 
   2   3   3  781.32   28.80 
   2   3   3  775.72   28.80 
   2   3   3  843.02   28.80 
   2   3   3  811.52   29.10 
   2   3   3  786.82   28.70 
  -3  -3  -3  194.28    6.80 
  -3  -3  -3  187.58    7.40 
  -3  -3  -3  200.18    7.20 
  -3  -3  -3  195.28    8.00 
  -3  -3  -3  186.78    7.10 
   3   3   3  193.58    7.30 
   3   3   3  185.38    7.00 
   3   3   3  187.48    7.10 
   3   3   3  193.98    7.90 
   3   3   3  193.78    7.10 
   3   3   3  191.68    6.90 
   3   3   3  183.58    7.00 
   3   3   3  184.28    7.10 
   3   3   3  177.88    7.00 
   3   3   3  189.08    6.70 
  -4  -3  -3 1049.89   36.10 
  -4  -3  -3  962.60   35.40 
  -4  -3  -3 1048.30   35.90 
  -4  -3  -3 1039.70   36.70 
  -4  -3  -3  954.90   35.20 
   4   3   3  960.90   35.50 
   4   3   3 1022.30   35.50 
   4   3   3 1010.40   35.40 
   4   3   3 1061.29   35.90 
   4   3   3  975.80   36.40 
   4   3   3  995.70   35.60 
   4   3   3 1005.80   35.50 
   4   3   3 1014.80   35.60 
  -5  -3  -3  845.92   30.50 
  -5  -3  -3  860.81   30.20 
  -5  -3  -3  829.92   29.50 
  -5  -3  -3  843.82   31.10 
   5   3   3  843.92   29.70 
   5   3   3  834.72   29.70 
   5   3   3  817.72   29.80 
   5   3   3  817.32   30.10 
  -6  -3  -3  192.78    8.20 
  -6  -3  -3  203.98    7.40 
  -6  -3  -3  189.48    9.00 
  -6  -3  -3  198.68    7.90 
  -6  -3  -3  203.58    8.60 
   6   3   3  206.58    8.20 
   6   3   3  204.68    7.70 
   6   3   3  196.18    7.80 
   6   3   3  184.08    8.00 
   6   3   3  190.98    7.80 
  -7  -3  -3   39.20    2.10 
  -7  -3  -3   39.90    2.60 
  -7  -3  -3   38.90    2.80 
  -7  -3  -3   39.80    3.30 
   7   3   3   36.20    2.20 
   7   3   3   38.10    3.00 
   7   3   3   39.30    2.50 
   7   3   3   39.30    2.90 
   7   3   3   38.10    2.70 
   7   3   3   39.00    2.40 
   7   3   3   40.00    2.60 
   7   3   3   39.70    3.10 
   7   3   3   40.00    2.70 
   7   3   3   38.80    2.50 
   7   3   3   33.90    2.50 
  -8  -3  -3  938.61   32.50 
  -8  -3  -3  872.51   34.10 
  -8  -3  -3  887.01   32.30 
  -8  -3  -3  908.01   33.10 
   8   3   3  911.81   33.20 
   8   3   3  885.11   33.60 
   8   3   3  944.81   33.80 
   8   3   3  943.91   33.00 
   8   3   3  941.11   33.00 
   8   3   3  874.01   33.30 
   8   3   3  957.60   33.20 
   8   3   3  890.11   33.40 
  -9  -3  -3    4.50    0.90 
  -9  -3  -3    4.70    1.30 
  -9  -3  -3    2.30    0.90 
   9   3   3    5.60    1.50 
   9   3   3    4.40    1.80 
   9   3   3    4.00    1.60 
   9   3   3    4.60    1.60 
   9   3   3    5.80    1.40 
   9   3   3    1.50    1.30 
   9   3   3    3.60    1.10 
   9   3   3    3.80    1.60 
 -10  -3  -3   29.80    1.80 
 -10  -3  -3   27.80    1.90 
  10   3   3   28.30    2.40 
  10   3   3   28.80    2.80 
  10   3   3   28.60    2.20 
  10   3   3   27.80    2.70 
  10   3   3   27.60    2.50 
   6  -4  -3   52.89    3.70 
   6  -4  -3   53.09    3.10 
   6  -4  -3   45.80    3.40 
   6  -4  -3   52.49    3.50 
  -6   4   3   52.59    2.50 
  -6   4   3   53.69    2.60 
   5  -4  -3   41.10    3.60 
   5  -4  -3   44.40    3.40 
   5  -4  -3   44.60    3.20 
   5  -4  -3   41.80    3.00 
   5  -4  -3   41.40    3.40 
   5  -4  -3   42.00    2.90 
   5  -4  -3   45.10    3.50 
  -5   4   3   44.20    2.30 
  -5   4   3   44.50    2.50 
  -5   4   3   46.00    3.00 
  -5   4   3   41.80    3.40 
   4  -4  -3  165.68    7.00 
   4  -4  -3  166.88    7.30 
   4  -4  -3  159.68    7.30 
   4  -4  -3  168.48    7.30 
   4  -4  -3  156.68    7.50 
   4  -4  -3  157.28    7.70 
   4  -4  -3  166.68    7.10 
   4  -4  -3  159.68    7.40 
  -4   4   3  163.78    7.30 
  -4   4   3  157.58    6.30 
  -4   4   3  159.98    7.10 
  -4   4   3  163.48    6.50 
  -4   4   3  168.28    7.50 
  -4   4   3  164.98    7.10 
   3  -4  -3  189.48    7.70 
   3  -4  -3  187.08    8.10 
   3  -4  -3  187.38    7.90 
   3  -4  -3  195.08    7.90 
   3  -4  -3  187.28    8.30 
   3  -4  -3  196.18    7.80 
   3  -4  -3  179.68    7.90 
   3  -4  -3  186.98    7.90 
   3  -4  -3  183.18    8.20 
   3  -4  -3  192.28    8.10 
   3  -4  -3  174.98    7.40 
  -3   4   3  197.38    8.00 
  -3   4   3  178.38    7.90 
  -3   4   3  192.68    8.10 
  -3   4   3  195.48    7.80 
  -3   4   3  185.88    7.80 
  -3   4   3  201.28    7.30 
  -3   4   3  181.98    7.10 
   2  -4  -3    8.00    1.40 
   2  -4  -3    8.70    1.30 
   2  -4  -3    5.80    1.30 
   2  -4  -3    5.60    1.20 
   2  -4  -3    4.90    0.70 
   2  -4  -3    6.70    1.20 
   2  -4  -3    3.60    1.80 
   2  -4  -3    8.70    1.40 
   2  -4  -3    6.70    1.40 
   2  -4  -3    6.50    1.10 
   2  -4  -3    4.60    1.00 
   2  -4  -3    6.60    1.10 
   2  -4  -3    4.30    0.90 
  -2   4   3    7.40    1.30 
  -2   4   3    5.40    0.80 
  -2   4   3    6.50    1.30 
  -2   4   3    5.00    1.10 
  -2   4   3    6.30    1.40 
  -2   4   3    5.70    1.10 
  -2   4   3    6.50    1.70 
   1  -4  -3  200.78    7.50 
   1  -4  -3  188.58    7.20 
   1  -4  -3  188.48    7.50 
   1  -4  -3  185.38    7.00 
   1  -4  -3  193.28    7.50 
  -1   4   3  184.68    7.50 
  -1   4   3  183.68    8.60 
  -1   4   3  189.28    7.30 
  -1   4   3  168.18    7.20 
  -1   4   3  188.28    7.00 
  -1   4   3  175.78    8.40 
  -1   4   3  183.28    7.40 
  -1   4   3  183.78    7.50 
   0  -4  -3  200.88    7.40 
   0  -4  -3  206.18    7.90 
   0  -4  -3  212.68    7.90 
   0  -4  -3  209.48    7.40 
   0  -4  -3  198.78    8.70 
   0  -4  -3  197.58    7.60 
   0  -4  -3  200.68    7.80 
   0   4   3  200.08    7.90 
   0   4   3  187.88    7.70 
   0   4   3  186.38    7.60 
   0   4   3  193.68    7.60 
   0   4   3  206.98    8.10 
   0   4   3  195.58    8.70 
   0   4   3  208.88    9.00 
   0   4   3  195.48    7.40 
   0   4   3  211.88    7.80 
   0   4   3  211.48    7.90 
  -1  -4  -3 2190.88   73.99 
  -1  -4  -3 2140.19   75.49 
  -1  -4  -3 2170.18   74.49 
  -1  -4  -3 2055.99   74.19 
  -1  -4  -3 2140.19   74.29 
  -1  -4  -3 2124.39   74.09 
   1   4   3 2057.59   74.29 
   1   4   3 1942.61   74.19 
   1   4   3 2200.08   74.39 
   1   4   3 2092.79   74.59 
   1   4   3 2133.79   74.19 
   1   4   3 2122.69   74.39 
   1   4   3 2133.69   75.59 
   1   4   3 2179.78   74.39 
   1   4   3 2161.58   75.19 
  -2  -4  -3  889.01   30.40 
  -2  -4  -3  921.41   30.80 
  -2  -4  -3  909.41   31.90 
  -2  -4  -3  857.91   30.50 
  -2  -4  -3  922.71   30.40 
  -2  -4  -3  795.42   30.60 
  -2  -4  -3  820.72   30.50 
   2   4   3  882.91   30.60 
   2   4   3  771.42   30.60 
   2   4   3  857.91   30.90 
   2   4   3  859.11   30.70 
   2   4   3  882.71   30.70 
   2   4   3  908.11   30.70 
   2   4   3  831.42   30.60 
   2   4   3  832.12   30.50 
   2   4   3  900.91   31.90 
   2   4   3  860.31   30.60 
   2   4   3  848.42   30.60 
   2   4   3  908.21   31.50 
  -3  -4  -3  819.02   30.10 
  -3  -4  -3  860.81   29.60 
  -3  -4  -3  863.81   31.00 
  -3  -4  -3  845.12   29.90 
  -3  -4  -3  830.02   29.60 
  -3  -4  -3  872.41   30.00 
   3   4   3  776.42   29.70 
   3   4   3  823.42   29.70 
   3   4   3  840.92   29.90 
   3   4   3  887.01   29.90 
   3   4   3  889.81   29.90 
   3   4   3  832.82   30.00 
   3   4   3  820.82   29.80 
   3   4   3  831.62   31.00 
  -4  -4  -3  605.14   21.60 
  -4  -4  -3  633.14   22.20 
  -4  -4  -3  642.74   21.90 
  -4  -4  -3  600.24   21.90 
  -4  -4  -3  631.54   22.50 
  -4  -4  -3  642.94   23.30 
  -4  -4  -3  585.84   21.60 
   4   4   3  581.94   23.00 
   4   4   3  608.24   22.00 
   4   4   3  601.14   21.90 
   4   4   3  610.94   22.20 
   4   4   3  617.54   22.00 
   4   4   3  605.84   21.90 
   4   4   3  609.74   21.80 
  -5  -4  -3  145.39    6.60 
  -5  -4  -3  154.18    7.20 
  -5  -4  -3  150.78    5.70 
  -5  -4  -3  146.89    6.30 
   5   4   3  150.58    5.90 
   5   4   3  141.89    5.90 
   5   4   3  150.08    6.30 
   5   4   3  148.49    5.90 
   5   4   3  151.68    6.10 
  -6  -4  -3   49.70    2.40 
  -6  -4  -3   46.40    3.60 
  -6  -4  -3   51.69    3.00 
  -6  -4  -3   53.59    3.40 
   6   4   3   52.39    2.60 
   6   4   3   51.59    3.00 
   6   4   3   46.20    2.70 
   6   4   3   48.40    2.70 
   6   4   3   49.10    3.20 
   6   4   3   50.89    2.60 
   6   4   3   50.09    2.70 
   6   4   3   46.60    2.50 
   6   4   3   49.30    2.80 
  -7  -4  -3   11.60    2.10 
  -7  -4  -3   14.60    1.30 
  -7  -4  -3   11.90    1.60 
  -7  -4  -3   10.70    1.90 
  -7  -4  -3    9.00    1.00 
   7   4   3   10.60    1.70 
   7   4   3    9.30    1.40 
   7   4   3   10.50    1.80 
   7   4   3   13.90    2.00 
   7   4   3   10.10    1.50 
   7   4   3    8.20    1.40 
   7   4   3   10.40    1.80 
   7   4   3    9.50    1.30 
   7   4   3   10.70    1.30 
   7   4   3   11.80    1.80 
   7   4   3   11.90    1.50 
   7   4   3   10.00    1.20 
  -8  -4  -3  717.23   25.30 
  -8  -4  -3  734.73   26.00 
  -8  -4  -3  676.03   26.90 
  -8  -4  -3  698.43   25.10 
   8   4   3  716.33   25.80 
   8   4   3  706.63   26.40 
   8   4   3  720.53   25.40 
   8   4   3  706.63   26.00 
   8   4   3  683.33   26.00 
   8   4   3  698.83   25.90 
   8   4   3  702.13   26.20 
   8   4   3  729.13   26.50 
   8   4   3  707.23   25.70 
   8   4   3  664.63   25.60 
  -9  -4  -3  281.87   10.80 
  -9  -4  -3  288.47   11.60 
  -9  -4  -3  299.77   11.10 
   9   4   3  302.47   11.50 
   9   4   3  308.37   11.70 
   9   4   3  283.57   11.40 
   9   4   3  271.37   11.00 
   9   4   3  288.47   12.20 
   9   4   3  285.27   11.80 
   9   4   3  297.67   11.70 
   9   4   3  293.47   12.10 
 -10  -4  -3   33.30    2.10 
 -10  -4  -3   35.60    2.00 
  10   4   3   37.20    2.70 
  10   4   3   30.70    2.80 
  10   4   3   35.40    3.00 
  10   4   3   36.90    2.60 
  10   4   3   34.40    3.10 
 -11  -4  -3   16.00    1.20 
  11   4   3   16.70    1.80 
   6  -5  -3    9.40    1.50 
   6  -5  -3    5.40    1.20 
  -6   5   3    7.20    0.80 
  -6   5   3    6.50    1.20 
   5  -5  -3    0.60    1.00 
   5  -5  -3    0.40    1.20 
   5  -5  -3    0.70    1.20 
   5  -5  -3    0.90    1.40 
   5  -5  -3    0.80    1.00 
  -5   5   3    2.80    0.80 
  -5   5   3    0.60    0.80 
   4  -5  -3   39.40    3.00 
   4  -5  -3   47.50    3.30 
   4  -5  -3   39.00    3.30 
   4  -5  -3   40.10    3.20 
   4  -5  -3   40.10    2.90 
   4  -5  -3   45.10    3.00 
   4  -5  -3   40.80    3.60 
   4  -5  -3   40.80    3.20 
  -4   5   3   40.80    2.60 
  -4   5   3   45.60    3.00 
  -4   5   3   43.80    2.40 
  -4   5   3   42.70    3.50 
  -4   5   3   49.00    3.90 
  -4   5   3   45.00    2.60 
   3  -5  -3  213.88    9.50 
   3  -5  -3  234.48   10.00 
   3  -5  -3  209.48    8.90 
   3  -5  -3  226.58    9.60 
   3  -5  -3  231.18    9.50 
   3  -5  -3  223.68    9.20 
   3  -5  -3  229.98    9.60 
   3  -5  -3  247.78    9.30 
   3  -5  -3  227.98    9.40 
  -3   5   3  217.28    9.00 
  -3   5   3  236.58    8.80 
  -3   5   3  232.38    9.70 
  -3   5   3  227.08    9.60 
  -3   5   3  230.88    8.60 
  -3   5   3  213.48    9.30 
  -3   5   3  231.48    9.20 
  -3   5   3  222.38    8.90 
   2  -5  -3  110.89    5.00 
   2  -5  -3  114.89    5.20 
   2  -5  -3  114.99    5.30 
   2  -5  -3  113.39    5.10 
   2  -5  -3  112.69    5.30 
   2  -5  -3  116.79    5.20 
   2  -5  -3  118.89    5.40 
   2  -5  -3  115.19    5.40 
   2  -5  -3  111.89    5.60 
  -2   5   3  113.69    5.10 
  -2   5   3  110.19    5.30 
  -2   5   3  106.49    4.80 
  -2   5   3  111.99    4.70 
  -2   5   3  102.79    5.10 
  -2   5   3   99.89    5.30 
  -2   5   3  111.49    4.50 
  -2   5   3  116.59    5.50 
  -2   5   3  109.79    5.00 
   1  -5  -3  164.58    6.70 
   1  -5  -3  151.88    6.90 
   1  -5  -3  170.58    6.90 
   1  -5  -3  167.08    6.90 
   1  -5  -3  165.78    6.40 
   1  -5  -3  171.08    7.10 
   1  -5  -3  169.68    6.70 
   1  -5  -3  176.98    7.10 
   1  -5  -3  162.68    6.90 
   1  -5  -3  159.88    7.00 
  -1   5   3  174.48    7.00 
  -1   5   3  170.48    6.40 
  -1   5   3  151.68    6.50 
  -1   5   3  156.48    6.60 
  -1   5   3  163.68    6.30 
  -1   5   3  176.68    7.20 
  -1   5   3  171.98    7.40 
  -1   5   3  172.08    6.80 
  -1   5   3  147.89    6.60 
  -1   5   3  167.88    7.00 
  -1   5   3  158.48    6.80 
   0  -5  -3 1734.93   60.09 
   0  -5  -3 1679.83   59.59 
   0  -5  -3 1717.33   60.19 
   0  -5  -3 1656.83   60.19 
   0  -5  -3 1771.82   59.89 
   0  -5  -3 1698.53   59.69 
   0   5   3 1671.73   59.99 
   0   5   3 1721.33   59.99 
   0   5   3 1769.02   60.19 
   0   5   3 1704.53   60.19 
   0   5   3 1669.83   59.59 
   0   5   3 1628.44   59.89 
   0   5   3 1708.23   61.89 
   0   5   3 1747.33   60.19 
   0   5   3 1641.14   61.39 
   0   5   3 1725.93   60.49 
  -1  -5  -3   65.59    2.80 
  -1  -5  -3   62.19    2.90 
  -1  -5  -3   68.19    3.10 
  -1  -5  -3   64.79    3.20 
  -1  -5  -3   66.29    2.70 
  -1  -5  -3   61.39    4.10 
   1   5   3   65.39    4.30 
   1   5   3   65.49    4.00 
   1   5   3   61.89    3.20 
   1   5   3   67.49    3.20 
   1   5   3   63.69    3.20 
   1   5   3   63.29    3.40 
   1   5   3   56.39    2.90 
   1   5   3   65.99    3.00 
   1   5   3   63.09    3.10 
   1   5   3   59.39    2.70 
  -2  -5  -3  849.72   31.60 
  -2  -5  -3  881.71   29.80 
  -2  -5  -3  845.32   29.80 
  -2  -5  -3  794.32   30.00 
  -2  -5  -3  872.11   30.30 
   2   5   3  837.52   31.70 
   2   5   3  896.11   30.20 
   2   5   3  844.22   30.10 
   2   5   3  865.61   30.00 
   2   5   3  850.01   31.10 
   2   5   3  819.52   30.10 
   2   5   3  856.91   30.20 
   2   5   3  780.92   30.00 
   2   5   3  811.32   30.30 
   2   5   3  872.01   30.20 
  -3  -5  -3  765.22   28.90 
  -3  -5  -3  797.62   27.60 
  -3  -5  -3  731.73   27.40 
  -3  -5  -3  887.01   28.00 
  -3  -5  -3  771.82   27.10 
  -3  -5  -3  790.52   27.20 
   3   5   3  808.82   27.60 
   3   5   3  775.72   27.50 
   3   5   3  760.62   27.50 
   3   5   3  761.02   27.50 
   3   5   3  764.22   27.30 
   3   5   3  728.23   27.60 
   3   5   3  768.92   27.50 
   3   5   3  681.13   27.30 
   3   5   3  745.73   28.90 
  -4  -5  -3  368.06   13.70 
  -4  -5  -3  356.76   13.30 
  -4  -5  -3  365.66   14.00 
  -4  -5  -3  369.66   15.00 
  -4  -5  -3  379.36   13.70 
  -4  -5  -3  361.26   13.10 
  -4  -5  -3  359.16   13.20 
   4   5   3  374.16   13.50 
   4   5   3  364.16   13.80 
   4   5   3  365.46   13.60 
   4   5   3  375.86   13.40 
   4   5   3  340.07   14.80 
   4   5   3  380.96   13.60 
   4   5   3  372.56   13.60 
  -5  -5  -3  244.38    9.80 
  -5  -5  -3  245.68    9.40 
  -5  -5  -3  241.28    9.00 
  -5  -5  -3  238.18    9.00 
  -5  -5  -3  245.78   10.10 
  -5  -5  -3  245.08    9.20 
  -5  -5  -3  231.88   10.80 
   5   5   3  257.17    9.40 
   5   5   3  249.88    9.70 
   5   5   3  257.27    9.30 
   5   5   3  253.47    9.60 
   5   5   3  251.37    9.50 
  -6  -5  -3  366.56   14.70 
  -6  -5  -3  350.56   13.90 
  -6  -5  -3  359.46   13.70 
  -6  -5  -3  356.66   13.30 
  -6  -5  -3  374.96   14.30 
  -6  -5  -3  388.66   13.50 
   6   5   3  370.46   13.70 
   6   5   3  384.16   14.00 
   6   5   3  351.16   13.90 
   6   5   3  366.46   13.70 
   6   5   3  383.26   13.80 
   6   5   3  370.26   13.60 
   6   5   3  376.46   14.30 
   6   5   3  357.26   13.90 
   6   5   3  351.96   14.10 
   6   5   3  357.56   13.80 
   6   5   3  384.16   13.70 
   6   5   3  362.96   14.00 
   6   5   3  383.56   14.20 
  -7  -5  -3  213.88    9.20 
  -7  -5  -3  225.48    8.60 
  -7  -5  -3  241.58    8.80 
  -7  -5  -3  222.48    9.70 
  -7  -5  -3  229.98   10.20 
  -7  -5  -3  222.28    8.90 
   7   5   3  231.08    9.10 
   7   5   3  233.38    9.10 
   7   5   3  222.88    9.60 
   7   5   3  239.08    9.30 
   7   5   3  229.78    8.90 
   7   5   3  235.68    9.60 
   7   5   3  227.38    8.90 
   7   5   3  225.58    9.70 
   7   5   3  218.78    9.30 
   7   5   3  228.08    9.30 
   7   5   3  230.48    9.20 
   7   5   3  235.98    9.30 
  -8  -5  -3  410.56   14.90 
  -8  -5  -3  388.36   15.50 
  -8  -5  -3  420.66   15.60 
  -8  -5  -3  392.66   14.70 
  -8  -5  -3  400.46   16.60 
   8   5   3  407.86   15.30 
   8   5   3  397.56   15.60 
   8   5   3  411.56   15.60 
   8   5   3  414.06   15.50 
   8   5   3  395.46   15.90 
   8   5   3  399.96   15.00 
   8   5   3  405.26   15.40 
   8   5   3  394.86   15.90 
   8   5   3  407.06   15.30 
  -9  -5  -3   77.09    3.60 
  -9  -5  -3   74.59    4.10 
  -9  -5  -3   78.29    3.70 
  -9  -5  -3   77.49    4.40 
   9   5   3   78.49    4.00 
   9   5   3   76.89    4.10 
   9   5   3   74.19    4.70 
   9   5   3   75.39    4.20 
   9   5   3   83.79    4.30 
   9   5   3   83.59    4.90 
   9   5   3   76.89    4.40 
   9   5   3   75.79    3.80 
 -10  -5  -3   22.80    1.70 
 -10  -5  -3   21.10    2.30 
 -10  -5  -3   22.30    1.80 
  10   5   3   26.20    2.20 
  10   5   3   21.90    1.80 
  10   5   3   23.70    2.20 
  10   5   3   22.70    2.60 
  10   5   3   16.70    2.10 
  10   5   3   23.20    2.30 
 -11  -5  -3    9.50    0.90 
  11   5   3    9.20    1.50 
  11   5   3   12.50    1.60 
  11   5   3    9.60    1.20 
   5  -6  -3   60.89    3.30 
   5  -6  -3   61.09    3.50 
  -5   6   3   59.59    2.60 
  -5   6   3   61.39    3.20 
   4  -6  -3  110.79    5.30 
   4  -6  -3  120.99    5.90 
   4  -6  -3  115.29    5.40 
   4  -6  -3  110.29    5.10 
  -4   6   3  108.69    4.90 
  -4   6   3  118.69    4.60 
   3  -6  -3   77.49    4.40 
   3  -6  -3   71.09    4.30 
   3  -6  -3   78.29    4.10 
   3  -6  -3   76.29    4.00 
   3  -6  -3   69.19    3.70 
   3  -6  -3   80.69    4.80 
  -3   6   3   76.79    4.10 
  -3   6   3   83.09    3.50 
  -3   6   3   79.99    4.60 
  -3   6   3   74.79    3.90 
  -3   6   3   77.89    3.90 
  -3   6   3   76.69    4.80 
  -3   6   3   79.29    3.70 
   2  -6  -3  119.59    5.70 
   2  -6  -3  118.79    5.80 
   2  -6  -3  127.89    5.80 
   2  -6  -3  127.49    6.30 
   2  -6  -3  134.59    6.10 
   2  -6  -3  119.99    5.50 
   2  -6  -3  122.79    5.60 
  -2   6   3  113.09    5.40 
  -2   6   3  115.19    5.70 
  -2   6   3  120.79    5.20 
  -2   6   3  126.29    6.20 
  -2   6   3  117.89    5.90 
  -2   6   3  124.99    5.60 
  -2   6   3  126.09    5.00 
  -2   6   3  120.29    5.40 
  -2   6   3  121.59    6.30 
   1  -6  -3   51.69    3.10 
   1  -6  -3   58.29    3.50 
   1  -6  -3   54.69    3.20 
   1  -6  -3   57.49    3.20 
   1  -6  -3   54.59    3.40 
   1  -6  -3   59.59    3.40 
   1  -6  -3   56.69    3.40 
   1  -6  -3   52.59    2.70 
   1  -6  -3   58.09    3.50 
  -1   6   3   54.99    2.90 
  -1   6   3   56.99    3.40 
  -1   6   3   55.29    3.00 
  -1   6   3   56.69    3.20 
  -1   6   3   61.39    3.80 
  -1   6   3   57.29    2.70 
  -1   6   3   57.39    3.20 
  -1   6   3   59.89    3.60 
  -1   6   3   59.39    3.80 
  -1   6   3   57.89    3.30 
   0  -6  -3   34.90    1.90 
   0  -6  -3   36.90    2.60 
   0  -6  -3   36.80    2.00 
   0  -6  -3   33.80    2.60 
   0  -6  -3   36.40    2.50 
   0  -6  -3   39.60    2.50 
   0  -6  -3   36.30    2.40 
   0  -6  -3   39.40    2.50 
   0  -6  -3   36.60    2.50 
   0  -6  -3   34.50    2.30 
   0   6   3   38.60    2.90 
   0   6   3   36.70    2.10 
   0   6   3   37.00    2.60 
   0   6   3   34.70    1.90 
   0   6   3   42.20    2.70 
   0   6   3   36.90    2.40 
   0   6   3   37.20    2.70 
   0   6   3   37.50    2.40 
   0   6   3   36.40    2.30 
   0   6   3   35.40    2.40 
   0   6   3   38.20    2.80 
   0   6   3   38.30    2.30 
  -1  -6  -3  202.88    8.00 
  -1  -6  -3  213.98    8.10 
  -1  -6  -3  190.98    8.30 
  -1  -6  -3  196.98    7.60 
  -1  -6  -3  206.98    8.30 
  -1  -6  -3  208.78    7.70 
  -1  -6  -3  195.98    8.10 
   1   6   3  196.08    7.80 
   1   6   3  199.58    8.00 
   1   6   3  204.18    8.10 
   1   6   3  196.08    8.10 
   1   6   3  199.88    8.20 
   1   6   3  194.58    9.90 
   1   6   3  201.08    8.00 
   1   6   3  216.28    8.00 
   1   6   3  186.68    8.00 
   1   6   3  206.48    8.50 
   1   6   3  210.98    8.20 
   1   6   3  203.28    7.60 
   1   6   3  212.98    8.30 
  -2  -6  -3  207.68   10.00 
  -2  -6  -3  218.78    8.00 
  -2  -6  -3  224.18    8.60 
  -2  -6  -3  212.38    8.20 
  -2  -6  -3  183.08    8.50 
  -2  -6  -3  213.28    7.90 
   2   6   3  207.68    8.30 
   2   6   3  214.58    8.30 
   2   6   3  214.28    8.40 
   2   6   3  220.18    8.20 
   2   6   3  202.58    9.50 
   2   6   3  201.98    8.30 
   2   6   3  219.28    8.50 
   2   6   3  212.98    8.60 
   2   6   3  203.58   10.00 
   2   6   3  214.58    8.40 
  -3  -6  -3  161.08    6.00 
  -3  -6  -3  168.68    6.70 
  -3  -6  -3  146.79    7.90 
  -3  -6  -3  149.99    6.20 
  -3  -6  -3  166.88    6.10 
   3   6   3  146.79    6.50 
   3   6   3  159.68    6.50 
   3   6   3  158.58    6.50 
   3   6   3  153.18    6.20 
   3   6   3  157.68    6.40 
   3   6   3  154.28    6.50 
   3   6   3  146.79    7.90 
   3   6   3  161.68    6.50 
  -4  -6  -3   27.50    2.80 
  -4  -6  -3   19.70    1.30 
  -4  -6  -3   19.00    1.60 
  -4  -6  -3   20.20    1.70 
  -4  -6  -3   18.90    1.30 
  -4  -6  -3   20.50    1.70 
  -4  -6  -3   17.90    1.90 
  -4  -6  -3   19.40    1.80 
   4   6   3   16.90    1.70 
   4   6   3   21.00    1.80 
   4   6   3   21.40    1.90 
   4   6   3   19.30    1.70 
   4   6   3   19.70    1.50 
   4   6   3   18.80    1.70 
   4   6   3   20.10    1.60 
   4   6   3   20.50    1.70 
  -5  -6  -3  183.68    7.80 
  -5  -6  -3  185.78    7.10 
  -5  -6  -3  189.58    7.70 
  -5  -6  -3  186.08    7.40 
  -5  -6  -3  182.28    7.20 
  -5  -6  -3  186.38    7.50 
  -5  -6  -3  183.88    7.20 
  -5  -6  -3  190.68    8.20 
  -5  -6  -3  195.98    7.90 
   5   6   3  194.48    7.60 
   5   6   3  181.08    7.30 
   5   6   3  190.18    7.90 
   5   6   3  201.18    7.80 
   5   6   3  184.98    7.80 
   5   6   3  204.08    8.10 
   5   6   3  193.58    7.50 
   5   6   3  193.58    7.70 
   5   6   3  188.88    7.70 
  -6  -6  -3  141.69    5.50 
  -6  -6  -3  142.79    5.70 
  -6  -6  -3  129.39    6.20 
  -6  -6  -3  132.39    5.80 
  -6  -6  -3  139.29    6.70 
   6   6   3  138.39    5.70 
   6   6   3  137.49    6.10 
   6   6   3  136.09    6.40 
   6   6   3  132.49    5.90 
   6   6   3  143.29    5.80 
   6   6   3  141.59    5.90 
   6   6   3  139.99    6.20 
   6   6   3  130.69    6.00 
   6   6   3  141.99    6.20 
   6   6   3  133.59    5.80 
  -7  -6  -3  109.29    4.60 
  -7  -6  -3   99.79    5.60 
  -7  -6  -3  100.79    4.70 
  -7  -6  -3   97.99    4.30 
   7   6   3  104.29    4.80 
   7   6   3  104.19    4.60 
   7   6   3  104.69    5.20 
   7   6   3   97.59    4.50 
   7   6   3   98.79    5.00 
   7   6   3  102.69    4.90 
   7   6   3  103.09    5.10 
   7   6   3  108.39    5.50 
   7   6   3  103.29    4.80 
   7   6   3  101.59    5.20 
   7   6   3  100.09    4.60 
  -8  -6  -3   55.39    4.20 
  -8  -6  -3   53.99    2.80 
  -8  -6  -3   52.19    3.10 
  -8  -6  -3   54.39    3.40 
  -8  -6  -3   53.29    3.00 
   8   6   3   54.89    3.40 
   8   6   3   51.39    3.70 
   8   6   3   56.19    3.30 
   8   6   3   55.49    3.10 
   8   6   3   50.39    3.30 
   8   6   3   56.49    4.00 
   8   6   3   53.69    3.00 
   8   6   3   50.29    3.40 
   8   6   3   55.29    3.40 
  -9  -6  -3  224.98    9.30 
  -9  -6  -3  228.48    8.80 
  -9  -6  -3  226.88    8.60 
   9   6   3  226.48    9.30 
   9   6   3  227.78    9.70 
   9   6   3  225.28    9.70 
   9   6   3  213.38    9.30 
   9   6   3  209.68    9.00 
   9   6   3  223.58    8.90 
   9   6   3  232.98    9.30 
 -10  -6  -3   53.49    2.60 
 -10  -6  -3   52.19    2.80 
  10   6   3   45.50    3.20 
  10   6   3   54.09    3.60 
  10   6   3   51.49    2.80 
  10   6   3   55.49    3.20 
  10   6   3   52.49    3.10 
  10   6   3   51.69    3.60 
 -11  -6  -3   43.10    2.00 
 -11  -6  -3   43.30    2.60 
  11   6   3   41.10    2.30 
  11   6   3   39.60    2.70 
  11   6   3   30.20    2.90 
   4  -7  -3   11.10    1.60 
   4  -7  -3    9.60    1.10 
  -4   7   3   10.60    1.20 
  -4   7   3   10.60    1.50 
   3  -7  -3  120.49    5.30 
   3  -7  -3  111.09    4.90 
   3  -7  -3  100.09    5.40 
  -3   7   3  100.99    4.30 
  -3   7   3  106.09    4.80 
   2  -7  -3  217.08    9.20 
   2  -7  -3  215.68    8.70 
   2  -7  -3  192.38    8.50 
   2  -7  -3  207.58    8.50 
   2  -7  -3  198.28    8.40 
  -2   7   3  211.18    8.30 
  -2   7   3  205.98    8.80 
  -2   7   3  198.38    8.30 
  -2   7   3  203.08    7.70 
  -2   7   3  200.88    8.30 
  -2   7   3  190.18    8.90 
   1  -7  -3   -0.10    1.00 
   1  -7  -3    0.90    1.10 
   1  -7  -3    1.50    1.10 
   1  -7  -3    0.20    1.20 
  -1   7   3    2.30    1.20 
  -1   7   3    0.00    1.50 
  -1   7   3    0.30    1.30 
  -1   7   3    1.10    0.70 
  -1   7   3    2.10    1.10 
  -1   7   3    2.40    1.50 
  -1   7   3    0.50    1.20 
  -1   7   3    1.50    1.10 
   0  -7  -3  155.88    7.30 
   0  -7  -3  168.98    7.40 
   0  -7  -3  168.18    6.70 
   0  -7  -3  175.08    7.20 
   0  -7  -3  178.58    7.70 
   0  -7  -3  169.48    7.40 
   0   7   3  167.88    6.50 
   0   7   3  165.58    7.30 
   0   7   3  176.08    7.20 
   0   7   3  161.48    7.60 
   0   7   3  175.58    7.50 
   0   7   3  162.98    7.10 
   0   7   3  172.48    7.20 
   0   7   3  173.98    7.10 
   0   7   3  179.58    7.60 
  -1  -7  -3  112.49    5.30 
  -1  -7  -3  112.79    5.50 
  -1  -7  -3  112.99    4.70 
  -1  -7  -3  108.99    5.10 
  -1  -7  -3  114.79    5.30 
  -1  -7  -3  113.69    5.40 
  -1  -7  -3  119.69    4.90 
   1   7   3  106.19    5.20 
   1   7   3  115.69    5.10 
   1   7   3  118.39    5.20 
   1   7   3  101.69    5.40 
   1   7   3  119.29    5.50 
   1   7   3  114.39    5.30 
   1   7   3  109.29    5.00 
   1   7   3  108.79    5.20 
   1   7   3  110.79    5.30 
  -2  -7  -3  102.69    4.80 
  -2  -7  -3   92.49    4.50 
  -2  -7  -3  103.89    4.30 
  -2  -7  -3   98.99    4.60 
  -2  -7  -3   96.19    4.80 
  -2  -7  -3   94.49    4.10 
  -2  -7  -3   98.09    4.60 
  -2  -7  -3   96.19    5.00 
   2   7   3  104.09    4.80 
   2   7   3   95.39    4.60 
   2   7   3  101.99    4.70 
   2   7   3   93.69    4.90 
   2   7   3   97.89    4.60 
   2   7   3  100.49    4.50 
   2   7   3  102.99    4.50 
   2   7   3   98.39    4.70 
   2   7   3   92.99    4.70 
   2   7   3  102.49    4.90 
   2   7   3  107.59    5.00 
  -3  -7  -3  209.98    8.30 
  -3  -7  -3  205.98    8.40 
  -3  -7  -3  221.08    8.10 
  -3  -7  -3  203.98    8.50 
  -3  -7  -3  206.28    8.80 
  -3  -7  -3  223.08    8.80 
  -3  -7  -3  202.78    8.30 
  -3  -7  -3  205.58    7.90 
   3   7   3  210.48    8.50 
   3   7   3  212.28    8.50 
   3   7   3  199.18    8.60 
   3   7   3  204.48    8.20 
   3   7   3  201.68    8.10 
   3   7   3  204.18    8.50 
   3   7   3  199.28    8.20 
   3   7   3  220.68    8.60 
   3   7   3  203.38    8.50 
   3   7   3  220.18    8.60 
   3   7   3  203.18    8.60 
   3   7   3  209.78    8.50 
  -4  -7  -3  249.18    9.80 
  -4  -7  -3  267.97    9.40 
  -4  -7  -3  233.78    9.20 
  -4  -7  -3  242.78    9.90 
  -4  -7  -3  248.88    9.70 
  -4  -7  -3  249.48    9.30 
  -4  -7  -3  264.77   10.20 
   4   7   3  253.77    9.90 
   4   7   3  259.07    9.80 
   4   7   3  240.18    9.90 
   4   7   3  253.27   10.00 
   4   7   3  216.08    9.70 
   4   7   3  246.38    9.80 
   4   7   3  247.18    9.60 
   4   7   3  258.97   10.00 
   4   7   3  252.27    9.90 
   4   7   3  245.58   10.00 
   4   7   3  248.98   10.00 
  -5  -7  -3   60.89    2.90 
  -5  -7  -3   62.69    3.50 
  -5  -7  -3   61.39    3.00 
  -5  -7  -3   67.29    3.10 
  -5  -7  -3   62.19    3.30 
  -5  -7  -3   63.39    3.60 
  -5  -7  -3   63.39    3.40 
   5   7   3   65.19    3.10 
   5   7   3   67.89    3.50 
   5   7   3   67.59    3.30 
   5   7   3   69.49    3.40 
   5   7   3   67.69    3.60 
   5   7   3   65.39    3.50 
   5   7   3   65.99    3.60 
   5   7   3   64.89    3.70 
   5   7   3   63.09    3.50 
  -6  -7  -3   76.09    3.50 
  -6  -7  -3   72.39    4.00 
  -6  -7  -3   73.89    3.70 
  -6  -7  -3   68.49    3.20 
  -6  -7  -3   86.19    5.00 
  -6  -7  -3   68.19    4.30 
  -6  -7  -3   75.09    3.80 
   6   7   3   72.79    3.80 
   6   7   3   70.89    4.10 
   6   7   3   73.99    4.10 
   6   7   3   67.79    3.80 
   6   7   3   71.99    3.60 
   6   7   3   80.79    3.90 
   6   7   3   73.29    3.60 
   6   7   3   72.89    3.90 
   6   7   3   75.69    4.10 
  -7  -7  -3  139.69    7.40 
  -7  -7  -3  147.99    6.50 
  -7  -7  -3  161.38    6.50 
  -7  -7  -3  158.38    6.90 
  -7  -7  -3  154.88    6.20 
   7   7   3  149.19    6.90 
   7   7   3  159.28    7.00 
   7   7   3  156.68    6.60 
   7   7   3  157.38    6.70 
   7   7   3  146.89    6.40 
   7   7   3  147.99    6.40 
   7   7   3  150.78    6.80 
   7   7   3  157.08    7.30 
   7   7   3  151.78    6.80 
   7   7   3  157.48    6.40 
  -8  -7  -3  389.86   14.70 
  -8  -7  -3  398.16   15.00 
  -8  -7  -3  393.36   15.10 
  -8  -7  -3  385.66   14.60 
  -8  -7  -3  392.56   14.40 
   8   7   3  379.26   14.80 
   8   7   3  328.07   15.20 
   8   7   3  393.26   15.10 
   8   7   3  421.16   15.60 
   8   7   3  401.76   14.60 
   8   7   3  367.36   14.90 
   8   7   3  403.66   15.10 
   8   7   3  395.66   14.90 
  -9  -7  -3   64.89    3.70 
  -9  -7  -3   65.99    3.50 
  -9  -7  -3   71.19    4.20 
  -9  -7  -3   72.49    3.40 
   9   7   3   75.59    3.60 
   9   7   3   73.79    4.60 
   9   7   3   65.19    3.60 
   9   7   3   72.69    4.00 
   9   7   3   68.59    3.80 
   9   7   3   70.19    4.20 
   9   7   3   64.49    3.90 
   9   7   3   60.89    4.00 
 -10  -7  -3   24.00    1.80 
 -10  -7  -3   22.30    1.80 
  10   7   3   19.60    2.30 
  10   7   3   20.80    2.30 
  10   7   3   25.00    2.70 
  10   7   3   26.70    2.30 
  10   7   3   26.10    2.10 
 -11  -7  -3   96.69    4.00 
   3  -8  -3   46.40    3.10 
  -3   8   3   48.80    2.50 
   2  -8  -3   14.60    1.60 
   2  -8  -3   11.30    1.40 
   2  -8  -3   20.10    2.30 
   2  -8  -3   20.80    2.10 
  -2   8   3   18.50    1.80 
  -2   8   3   13.20    1.50 
  -2   8   3   21.10    1.90 
   1  -8  -3   14.60    1.80 
   1  -8  -3   20.30    3.30 
   1  -8  -3   18.50    2.10 
   1  -8  -3   13.00    2.10 
   1  -8  -3   15.20    2.00 
  -1   8   3   13.90    1.70 
  -1   8   3   16.30    1.90 
  -1   8   3   12.80    2.80 
   0  -8  -3   11.90    2.00 
   0  -8  -3   10.10    1.60 
   0  -8  -3    7.00    1.40 
   0  -8  -3   10.70    1.80 
   0  -8  -3   12.80    1.40 
   0   8   3   10.00    1.70 
   0   8   3   10.90    1.60 
   0   8   3    7.80    1.60 
   0   8   3   10.00    1.50 
   0   8   3    9.70    1.50 
   0   8   3    6.30    1.20 
  -1  -8  -3  155.58    6.30 
  -1  -8  -3  153.08    6.80 
  -1  -8  -3  140.49    6.90 
  -1  -8  -3  159.38    6.80 
  -1  -8  -3  156.08    6.90 
  -1  -8  -3  161.68    7.30 
   1   8   3  147.19    6.80 
   1   8   3  142.09    6.80 
   1   8   3  165.68    6.90 
   1   8   3  157.38    7.10 
   1   8   3  154.38    6.80 
   1   8   3  152.28    6.60 
   1   8   3  169.78    6.70 
  -2  -8  -3  282.77   11.30 
  -2  -8  -3  284.47   11.40 
  -2  -8  -3  281.77   11.80 
  -2  -8  -3  287.57   11.40 
  -2  -8  -3  292.97   11.60 
  -2  -8  -3  288.37   12.00 
  -2  -8  -3  298.07   11.00 
   2   8   3  294.37   11.80 
   2   8   3  303.67   11.80 
   2   8   3  289.77   11.40 
   2   8   3  288.07   11.50 
   2   8   3  284.47   11.60 
   2   8   3  295.77   11.30 
   2   8   3  293.57   11.60 
   2   8   3  301.57   11.30 
   2   8   3  282.97   11.60 
  -3  -8  -3  353.66   13.20 
  -3  -8  -3  347.57   13.30 
  -3  -8  -3  354.66   12.90 
  -3  -8  -3  340.47   13.80 
  -3  -8  -3  351.16   13.50 
  -3  -8  -3  327.17   13.60 
   3   8   3  336.27   13.40 
   3   8   3  347.47   13.50 
   3   8   3  342.77   13.30 
   3   8   3  350.36   13.50 
   3   8   3  349.87   13.50 
   3   8   3  333.57   13.00 
   3   8   3  341.27   13.20 
   3   8   3  338.17   13.00 
   3   8   3  339.97   13.40 
   3   8   3  349.87   13.40 
  -4  -8  -3  354.66   13.40 
  -4  -8  -3  327.77   13.60 
  -4  -8  -3  355.26   13.30 
  -4  -8  -3  350.76   12.80 
  -4  -8  -3  335.57   13.20 
   4   8   3  349.37   13.40 
   4   8   3  349.77   13.50 
   4   8   3  355.36   13.30 
   4   8   3  329.67   12.90 
   4   8   3  342.77   13.40 
   4   8   3  328.37   13.00 
   4   8   3  337.77   13.40 
   4   8   3  347.27   13.50 
   4   8   3  339.17   13.40 
  -5  -8  -3    0.30    0.80 
  -5  -8  -3    0.30    0.90 
  -5  -8  -3    1.00    1.10 
  -5  -8  -3    0.50    1.20 
  -5  -8  -3    0.40    0.80 
  -5  -8  -3    0.60    1.20 
   5   8   3    0.60    0.80 
   5   8   3    0.30    1.10 
   5   8   3    0.10    1.10 
   5   8   3    0.50    1.10 
   5   8   3    0.40    0.90 
   5   8   3    1.70    1.10 
   5   8   3    0.80    1.20 
   5   8   3    0.90    0.90 
   5   8   3    0.70    1.00 
  -6  -8  -3   65.39    3.60 
  -6  -8  -3   62.49    3.10
[truncated: 719,875 more chars]
