# Supplementary material for: Illuminating the dark conformational space of macrocycles using dominant rotors
Source: Springer Nature journal article supplement (doi:10.1038/s41557-020-00620-y), 2021-02-15
Supplement: 41557_2020_620_MOESM61_ESM.mol [file 41557_2020_620_MOESM61_ESM.mol]

nchem.20010080C-compSa-11e.mol
  ChemDraw12032023332D

 33 36  0  0  1  0  0  0  0  0999 V2000
   -3.3706    0.6355    0.0000 C   0  0  0  0  0  0  0  0  0  0  0  0
   -3.4235   -0.1879    0.0000 C   0  0  0  0  0  0  0  0  0  0  0  0
   -2.7368   -0.6457    0.0000 C   0  0  0  0  0  0  0  0  0  0  0  0
   -1.9980   -0.2794    0.0000 C   0  0  0  0  0  0  0  0  0  0  0  0
   -1.9451    0.5440    0.0000 C   0  0  0  0  0  0  0  0  0  0  0  0
   -2.6311    1.0011    0.0000 C   0  0  0  0  0  0  0  0  0  0  0  0
   -1.7311   -1.0601    0.0000 C   0  0  0  0  0  0  0  0  0  0  0  0
   -1.5810    1.2843    0.0000 N   0  0  0  0  0  0  0  0  0  0  0  0
   -0.9613    1.8292    0.0000 C   0  0  0  0  0  0  0  0  0  0  0  0
   -1.2879    2.5866    0.0000 N   0  0  0  0  0  0  0  0  0  0  0  0
   -2.1098    2.5097    0.0000 N   0  0  0  0  0  0  0  0  0  0  0  0
   -2.2910    1.7049    0.0000 C   0  0  0  0  0  0  0  0  0  0  0  0
   -3.0480    1.3783    0.0000 C   0  0  0  0  0  0  0  0  0  0  0  0
   -1.1862   -1.6798    0.0000 N   0  0  0  0  0  0  0  0  0  0  0  0
   -2.4503   -1.4640    0.0000 O   0  0  0  0  0  0  0  0  0  0  0  0
   -0.4460   -2.0435    0.0000 C   0  0  0  0  0  0  0  0  0  0  0  0
    0.3778   -2.0964    0.0000 C   0  0  0  0  0  0  0  0  0  0  0  0
    1.1578   -1.8299    0.0000 N   0  0  0  0  0  0  0  0  0  0  0  0
    0.4857   -2.9143    0.0000 O   0  0  0  0  0  0  0  0  0  0  0  0
   -0.1806    2.0953    0.0000 C   0  0  0  0  0  0  0  0  0  0  0  0
    0.6420    2.0424    0.0000 N   0  0  0  0  0  0  0  0  0  0  0  0
    1.7778   -1.2854    0.0000 C   0  0  0  0  0  0  0  0  0  0  0  0
    2.2367   -1.9706    0.0000 C   0  0  0  0  0  0  0  0  0  0  0  0
    3.0601   -1.9156    0.0000 C   0  0  0  0  0  0  0  0  0  0  0  0
    3.4235   -1.1749    0.0000 C   0  0  0  0  0  0  0  0  0  0  0  0
    2.9646   -0.4901    0.0000 C   0  0  0  0  0  0  0  0  0  0  0  0
    2.1412   -0.5451    0.0000 C   0  0  0  0  0  0  0  0  0  0  0  0
    2.1940    0.2787    0.0000 C   0  0  0  0  0  0  0  0  0  0  0  0
    1.9280    1.0590    0.0000 C   0  0  0  0  0  0  0  0  0  0  0  0
    1.3831    1.6787    0.0000 C   0  0  0  0  0  0  0  0  0  0  0  0
    1.8842    2.3336    0.0000 O   0  0  0  0  0  0  0  0  0  0  0  0
   -0.2896    2.9143    0.0000 C   0  0  0  0  0  0  0  0  0  0  0  0
   -0.6585   -2.8421    0.0000 C   0  0  0  0  0  0  0  0  0  0  0  0
  1  2  2  0      
  2  3  1  0      
  3  4  2  0      
  4  5  1  0      
  5  6  2  0      
  6  1  1  0      
  4  7  1  0      
  8  5  1  0      
  8  9  1  0      
  9 10  2  0      
 10 11  1  0      
 11 12  2  0      
 12  8  1  1      
 12 13  1  1      
  7 14  1  0      
  7 15  2  0      
 14 16  1  0      
 16 17  1  0      
 17 18  1  0      
 17 19  2  0      
  9 20  1  0      
 20 21  1  0      
 18 22  1  0      
 22 23  2  0      
 23 24  1  0      
 24 25  2  0      
 25 26  1  0      
 26 27  2  0      
 27 22  1  0      
 27 28  1  0      
 28 29  1  0      
 29 30  1  0      
 30 31  2  0      
 30 21  1  0      
 20 32  1  6      
 16 33  1  6      
M  END
