# Supplementary material for: Illuminating the dark conformational space of macrocycles using dominant rotors
Source: Springer Nature journal article supplement (doi:10.1038/s41557-020-00620-y), 2021-02-15
Supplement: 41557_2020_620_MOESM112_ESM.cif [file 41557_2020_620_MOESM112_ESM.cif]

####################################################################### 
# 
# This file contains crystal structure data downloaded from the 
# Cambridge Structural Database (CSD) hosted by the Cambridge 
# Crystallographic Data Centre (CCDC).
# 
# Full information about CCDC data access policies and citation 
# guidelines are available at http://www.ccdc.cam.ac.uk/access/V1 
# 
# Audit and citation data items may have been added by the CCDC. 
# Please retain this information to preserve the provenance of 
# this file and to allow appropriate attribution of the data. 
# 
#######################################################################

data_d1968a_a_sq
_database_code_depnum_ccdc_archive 'CCDC 1956028'
loop_
_audit_author_name
_audit_author_address
'Alan Lough'
;University of Toronto
Canada
;
_audit_update_record             
;
2019-09-26 deposited with the CCDC.	2020-01-17 downloaded from the CCDC.
;

_audit_creation_method           SHELXL-2018/3
_shelx_SHELXL_version_number     2018/3
_chemical_name_systematic        ?
_chemical_name_common            ?
_chemical_melting_point          ?
_chemical_formula_moiety         'C32 H36 N8 O5, H2 O'
_chemical_formula_sum            'C32 H38 N8 O6'
_chemical_formula_weight         630.70

# start Validation Reply Form
_vrf_PLAT606_d1968a_a_sq         
;
PROBLEM: VERY LARGE Solvent Accessible VOID(S) in Structure  ! Info    
RESPONSE: During the 
refinement of the structure, electron density peaks were located 
that were believed to be highly disordered 
solvent molecules (Acetonile was the crystallization solvent used but
water is also present). 
Attempts made to model the solvent molecule were not successful. 
The SQUEEZE (Spek, 2015) option in PLATON (Spek, 2009) indicated there 
was a large solvent cavity of 345 A**3. In the final cycles of 
refinement, this contribution of 87 electrons to the 
electron density was removed from the observed data. The 
density, the F(000) value, the molecular weight and the formula are 
given without taking into account the results obtained with the 
SQUEEZE (Spek, 2015) option PLATON (Spek, 2009). Similar treatments 
of disordered solvent molecules were carried out by 
St\"ahler et al. (2001), 
Cox et al. (2003), Mohamed et al. (2003) and Athimoolam et al. (2005). 
References: 
Spek, A. L. (2015). Acta Cryst. C71, 9--18.
  
Spek, A. L. (2009). <i>Acta Cryst.</i> <b>D65</b>, 148--155.
  
Athimoolam, S., Kumar, J., Ramakrishnan, V. & Rajaram, R.K. (2005). 
Acta Cryst. E61, m2014-m2017. 
  
Cox, J.P., Kumarasammy, Y., Nahar, L., Sarkar D.S. & Shoeb, M. 
(2003). Acta Cryst. E59, o975-o977. 
  
Mohamed, A.A., Krause Bauer, A.J., Bruce, E.A. & Bruce M.R.M. 
(2003). Acta Cryst. C59, m84-m86. 
  
St\"ahler, R., N\"ather, C. & Bensch, W. (2001). Acta Cryst. 
C57, 26-27.
;

loop_
_atom_type_symbol
_atom_type_description
_atom_type_scat_dispersion_real
_atom_type_scat_dispersion_imag
_atom_type_scat_source
C C 0.0181 0.0091 'International Tables Vol C Tables 4.2.6.8 and 6.1.1.4'
H H 0.0000 0.0000 'International Tables Vol C Tables 4.2.6.8 and 6.1.1.4'
N N 0.0311 0.0180 'International Tables Vol C Tables 4.2.6.8 and 6.1.1.4'
O O 0.0492 0.0322 'International Tables Vol C Tables 4.2.6.8 and 6.1.1.4'

_space_group_crystal_system      orthorhombic
_space_group_IT_number           18
_space_group_name_H-M_alt        'P 21 21 2'
_space_group_name_Hall           'P 2 2ab'

_shelx_space_group_comment       
; 
The symmetry employed for this shelxl refinement is uniquely defined 
by the following loop, which should always be used as a source of 
symmetry information in preference to the above space-group names. 
They are only intended as comments. 
;

loop_
_space_group_symop_operation_xyz
'x, y, z'
'-x, -y, z'
'-x+1/2, y+1/2, -z'
'x+1/2, -y+1/2, -z'

_cell_length_a                   16.6343(6)
_cell_length_b                   24.6040(9)
_cell_length_c                   8.9243(3)
_cell_angle_alpha                90
_cell_angle_beta                 90
_cell_angle_gamma                90
_cell_volume                     3652.5(2)
_cell_formula_units_Z            4
_cell_measurement_temperature    150(2)
_cell_measurement_reflns_used    5978
_cell_measurement_theta_min      3.21
_cell_measurement_theta_max      51.88

_exptl_crystal_description       needle
_exptl_crystal_colour            colourless
_exptl_crystal_density_meas      ?
_exptl_crystal_density_method    ?
_exptl_crystal_density_diffrn    1.147
_exptl_crystal_F_000             1336
_exptl_transmission_factor_min   ?
_exptl_transmission_factor_max   ?
_exptl_crystal_size_max          0.280
_exptl_crystal_size_mid          0.050
_exptl_crystal_size_min          0.050
_exptl_absorpt_coefficient_mu    0.669
_shelx_estimated_absorpt_T_min   0.835
_shelx_estimated_absorpt_T_max   0.967
_exptl_absorpt_correction_type   multi-scan
_exptl_absorpt_correction_T_min  0.6375
_exptl_absorpt_correction_T_max  0.7530
_exptl_absorpt_process_details   'SADABS (Krause et al., 2015)'
_exptl_absorpt_special_details   ?
_diffrn_ambient_temperature      150(2)
_diffrn_radiation_wavelength     1.54178
_diffrn_radiation_type           CuK\a
_diffrn_source                   'Bruker ImuS with multi-layer optics'
_diffrn_measurement_device_type  'Bruker Kappa APEX-DUO CCD'
_diffrn_measurement_method       '\f and \w scans'
_diffrn_detector_area_resol_mean ?
_diffrn_reflns_number            67866
_diffrn_reflns_av_unetI/netI     0.0555
_diffrn_reflns_av_R_equivalents  0.1107
_diffrn_reflns_limit_h_min       -19
_diffrn_reflns_limit_h_max       19
_diffrn_reflns_limit_k_min       -29
_diffrn_reflns_limit_k_max       29
_diffrn_reflns_limit_l_min       -10
_diffrn_reflns_limit_l_max       10
_diffrn_reflns_theta_min         3.207
_diffrn_reflns_theta_max         67.717
_diffrn_reflns_theta_full        67.679
_diffrn_measured_fraction_theta_max 0.998
_diffrn_measured_fraction_theta_full 0.998
_diffrn_reflns_Laue_measured_fraction_max 0.998
_diffrn_reflns_Laue_measured_fraction_full 0.998
_diffrn_reflns_point_group_measured_fraction_max 0.997
_diffrn_reflns_point_group_measured_fraction_full 0.997
_reflns_number_total             6607
_reflns_number_gt                5466
_reflns_threshold_expression     'I > 2\s(I)'
_reflns_Friedel_coverage         0.769
_reflns_Friedel_fraction_max     0.995
_reflns_Friedel_fraction_full    0.996

_reflns_special_details          
; 
 Reflections were merged by SHELXL according to the crystal 
 class for the calculation of statistics and refinement. 
  
 Structure factors included contributions from the .fab file. 
  
 _reflns_Friedel_fraction is defined as the number of unique 
 Friedel pairs measured divided by the number that would be 
 possible theoretically, ignoring centric projections and 
 systematic absences. 
;

_computing_data_collection       'APEX3 (Bruker, 2018)'
_computing_cell_refinement       APEX3
_computing_data_reduction        'SAINT (Bruker, 2014)'
_computing_structure_solution    'SHELXT 2014/5 (Sheldrick, 2015a)'
_computing_structure_refinement  'SHELXL-2018/3 (Sheldrick, 2015b)'
_computing_molecular_graphics    'PLATON (Spek, 2009)'
_computing_publication_material  'SHELXTL (Sheldrick, 2008)'
_refine_special_details          ?
_refine_ls_structure_factor_coef Fsqd
_refine_ls_matrix_type           full
_refine_ls_weighting_scheme      calc
_refine_ls_weighting_details     
'w=1/[\s^2^(Fo^2^)+(0.0583P)^2^+0.8516P] where P=(Fo^2^+2Fc^2^)/3'
_atom_sites_solution_primary     ?
_atom_sites_solution_secondary   ?
_atom_sites_solution_hydrogens   mixed
_refine_ls_hydrogen_treatment    constr
_refine_ls_extinction_method     'SHELXL-2018/3 (Sheldrick 2018)'
_refine_ls_extinction_coef       0.0028(3)
_refine_ls_extinction_expression Fc^*^=kFc[1+0.001xFc^2^\l^3^/sin(2\q)]^-1/4^
_refine_ls_abs_structure_details 
; 
 Flack x determined using 2055 quotients [(I+)-(I-)]/[(I+)+(I-)] 
 (Parsons, Flack and Wagner, Acta Cryst. B69 (2013) 249-259). 
;
_refine_ls_abs_structure_Flack   -0.06(13)
_chemical_absolute_configuration ad
_refine_ls_number_reflns         6607
_refine_ls_number_parameters     435
_refine_ls_number_restraints     40
_refine_ls_R_factor_all          0.0626
_refine_ls_R_factor_gt           0.0496
_refine_ls_wR_factor_ref         0.1270
_refine_ls_wR_factor_gt          0.1197
_refine_ls_goodness_of_fit_ref   1.058
_refine_ls_restrained_S_all      1.058
_refine_ls_shift/su_max          0.000
_refine_ls_shift/su_mean         0.000

loop_
_atom_site_label
_atom_site_type_symbol
_atom_site_fract_x
_atom_site_fract_y
_atom_site_fract_z
_atom_site_U_iso_or_equiv
_atom_site_adp_type
_atom_site_occupancy
_atom_site_site_symmetry_order
_atom_site_calc_flag
_atom_site_refinement_flags_posn
_atom_site_refinement_flags_adp
_atom_site_refinement_flags_occupancy
_atom_site_disorder_assembly
_atom_site_disorder_group
O1 O 0.38196(16) 0.29971(11) 0.5713(3) 0.0440(6) Uani 1 1 d . . . . .
O2 O 0.21224(19) 0.22394(14) 0.5803(3) 0.0617(8) Uani 1 1 d . . . . .
O3 O 0.4095(3) 0.22880(14) 1.0877(4) 0.0781(11) Uani 1 1 d . . . . .
O4 O 0.63027(17) 0.22749(14) 0.8258(4) 0.0614(8) Uani 1 1 d . . . . .
O5 O 0.42273(15) 0.43462(11) 0.5818(3) 0.0409(6) Uani 1 1 d . . . . .
N1 N 0.25757(19) 0.33160(13) 0.6076(3) 0.0401(7) Uani 1 1 d . . . . .
N2 N 0.2535(2) 0.20348(13) 0.8151(4) 0.0474(8) Uani 1 1 d . . . . .
N4 N 0.52418(19) 0.27113(13) 0.7232(4) 0.0428(8) Uani 1 1 d . . . . .
H4 H 0.471649 0.271292 0.711544 0.051 Uiso 1 1 calc R U . A 1
N5 N 0.54427(19) 0.36942(14) 0.8879(3) 0.0437(7) Uani 1 1 d . . . . .
N6 N 0.5485(2) 0.42449(14) 0.9274(4) 0.0478(8) Uani 1 1 d . . . . .
N7 N 0.58274(18) 0.41605(12) 0.6921(3) 0.0364(7) Uani 1 1 d . . . . .
N8 N 0.41896(17) 0.38271(12) 0.3728(3) 0.0366(7) Uani 1 1 d . . . . .
H8 H 0.444596 0.369795 0.294270 0.044 Uiso 1 1 calc R U . . .
C1 C 0.3274(2) 0.33081(16) 0.5338(4) 0.0376(8) Uani 1 1 d . . . . .
C2 C 0.2467(2) 0.29846(15) 0.7422(4) 0.0387(8) Uani 1 1 d . . . . .
H2A H 0.292308 0.304057 0.813560 0.046 Uiso 1 1 calc R U . . .
C3 C 0.1677(3) 0.32033(18) 0.8088(5) 0.0493(10) Uani 1 1 d . . . . .
H3A H 0.137670 0.291185 0.860887 0.059 Uiso 1 1 calc R U . . .
H3B H 0.178181 0.350303 0.880229 0.059 Uiso 1 1 calc R U . . .
C4 C 0.1221(3) 0.3405(2) 0.6731(5) 0.0605(12) Uani 1 1 d . . . . .
H4A H 0.081458 0.367897 0.702061 0.073 Uiso 1 1 calc R U . . .
H4B H 0.094888 0.310051 0.621157 0.073 Uiso 1 1 calc R U . . .
C5 C 0.1868(2) 0.3656(2) 0.5740(5) 0.0532(11) Uani 1 1 d . . . . .
H5A H 0.171970 0.363256 0.466767 0.064 Uiso 1 1 calc R U . . .
H5B H 0.196469 0.404047 0.600795 0.064 Uiso 1 1 calc R U . . .
C6 C 0.2378(2) 0.23885(17) 0.7036(4) 0.0432(9) Uani 1 1 d . . . . .
C7 C 0.2846(2) 0.21632(16) 0.9628(4) 0.0452(9) Uani 1 1 d . . . . .
H7A H 0.263308 0.252173 0.997579 0.054 Uiso 1 1 calc R U . . .
C8 C 0.2516(3) 0.1705(2) 1.0599(6) 0.0685(14) Uani 1 1 d . . . . .
H8A H 0.286390 0.164061 1.148055 0.082 Uiso 1 1 calc R U . . .
H8B H 0.196400 0.178842 1.094659 0.082 Uiso 1 1 calc R U . . .
C9 C 0.2520(3) 0.1224(2) 0.9563(7) 0.0759(16) Uani 1 1 d . . . . .
H9A H 0.212996 0.094527 0.989715 0.091 Uiso 1 1 calc R U . . .
H9B H 0.306132 0.105877 0.950882 0.091 Uiso 1 1 calc R U . . .
C10 C 0.2274(3) 0.14644(18) 0.8048(7) 0.0713(15) Uani 1 1 d . . . . .
H10A H 0.254839 0.127509 0.721390 0.086 Uiso 1 1 calc R U . . .
H10B H 0.168516 0.143964 0.789883 0.086 Uiso 1 1 calc R U . . .
C11 C 0.3755(3) 0.21571(16) 0.9708(5) 0.0464(9) Uani 1 1 d . . . . .
N3 N 0.4164(2) 0.19882(15) 0.8513(4) 0.0523(9) Uani 0.668(15) 1 d D . P B 1
H3 H 0.389171 0.196338 0.767087 0.063 Uiso 0.668(15) 1 calc R U P B 1
C12 C 0.5021(4) 0.1838(3) 0.8437(13) 0.057(3) Uani 0.668(15) 1 d D U P B 1
H12A H 0.517965 0.172046 0.946868 0.069 Uiso 0.668(15) 1 calc R U P B 1
C13 C 0.5161(5) 0.1354(3) 0.7419(15) 0.079(3) Uani 0.668(15) 1 d D U P B 1
H13A H 0.573521 0.126653 0.739685 0.119 Uiso 0.668(15) 1 calc R U P B 1
H13B H 0.485898 0.104056 0.779702 0.119 Uiso 0.668(15) 1 calc R U P B 1
H13C H 0.497746 0.144203 0.640352 0.119 Uiso 0.668(15) 1 calc R U P B 1
C14 C 0.5574(2) 0.23101(17) 0.8022(5) 0.0480(10) Uani 0.668(15) 1 d D . P B 1
N3A N 0.4164(2) 0.19882(15) 0.8513(4) 0.0523(9) Uani 0.332(15) 1 d D . P B 2
H3A1 H 0.395660 0.191660 0.762800 0.063 Uiso 0.332(15) 1 calc R U P B 2
C12A C 0.5019(6) 0.1941(6) 0.891(2) 0.056(5) Uani 0.332(15) 1 d D U P B 2
H12B H 0.507711 0.203323 0.999522 0.067 Uiso 0.332(15) 1 calc R U P B 2
C13A C 0.5254(11) 0.1351(6) 0.871(3) 0.082(5) Uani 0.332(15) 1 d D U P B 2
H13D H 0.582269 0.130502 0.896282 0.123 Uiso 0.332(15) 1 calc R U P B 2
H13E H 0.492458 0.112288 0.936425 0.123 Uiso 0.332(15) 1 calc R U P B 2
H13F H 0.516692 0.124430 0.766144 0.123 Uiso 0.332(15) 1 calc R U P B 2
C14A C 0.5574(2) 0.23101(17) 0.8022(5) 0.0480(10) Uani 0.332(15) 1 d D . P B 2
C15 C 0.5706(2) 0.31440(15) 0.6558(4) 0.0401(8) Uani 1 1 d . . . . .
H15A H 0.550797 0.321106 0.552842 0.048 Uiso 1 1 calc R U . . .
H15B H 0.627616 0.303171 0.649092 0.048 Uiso 1 1 calc R U . . .
C16 C 0.5646(2) 0.36558(15) 0.7448(4) 0.0367(8) Uani 1 1 d . . . . .
C17 C 0.5711(2) 0.45026(17) 0.8090(4) 0.0429(9) Uani 1 1 d . . . . .
H17A H 0.578721 0.488494 0.804243 0.051 Uiso 1 1 calc R U . . .
C18 C 0.6010(2) 0.43233(15) 0.5412(4) 0.0353(8) Uani 1 1 d . . . . .
C19 C 0.6770(2) 0.45243(16) 0.5108(4) 0.0421(9) Uani 1 1 d . . . . .
H19A H 0.717235 0.452274 0.586370 0.051 Uiso 1 1 calc R U . . .
C20 C 0.6942(2) 0.47278(16) 0.3696(4) 0.0429(9) Uani 1 1 d . . . . .
H20A H 0.745599 0.487848 0.348643 0.052 Uiso 1 1 calc R U . . .
C21 C 0.6357(2) 0.47089(16) 0.2596(4) 0.0429(9) Uani 1 1 d . . . . .
H21A H 0.647446 0.484763 0.162667 0.051 Uiso 1 1 calc R U . . .
C22 C 0.5606(2) 0.44932(15) 0.2873(4) 0.0382(8) Uani 1 1 d . . . . .
H22A H 0.522253 0.446895 0.208770 0.046 Uiso 1 1 calc R U . . .
C23 C 0.5409(2) 0.43092(14) 0.4319(4) 0.0332(7) Uani 1 1 d . . . . .
C24 C 0.4573(2) 0.41578(15) 0.4706(4) 0.0356(8) Uani 1 1 d . . . . .
C25 C 0.3351(2) 0.36861(16) 0.3982(4) 0.0366(8) Uani 1 1 d . . . . .
H25A H 0.304313 0.402690 0.418842 0.044 Uiso 1 1 calc R U . . .
C26 C 0.3006(2) 0.34178(16) 0.2572(4) 0.0394(8) Uani 1 1 d . . . . .
H26A H 0.337652 0.312832 0.223080 0.047 Uiso 1 1 calc R U . . .
H26B H 0.248432 0.324611 0.282005 0.047 Uiso 1 1 calc R U . . .
C27 C 0.2886(2) 0.38188(15) 0.1331(4) 0.0374(8) Uani 1 1 d . . . . .
C28 C 0.3404(2) 0.38337(17) 0.0102(4) 0.0447(9) Uani 1 1 d . . . . .
H28A H 0.384508 0.358929 0.004910 0.054 Uiso 1 1 calc R U . . .
C29 C 0.3274(3) 0.42078(19) -0.1049(4) 0.0551(11) Uani 1 1 d . . . . .
H29A H 0.362046 0.421048 -0.189451 0.066 Uiso 1 1 calc R U . . .
C30 C 0.2651(3) 0.45708(18) -0.0970(4) 0.0547(11) Uani 1 1 d . . . . .
H30A H 0.257060 0.482530 -0.175619 0.066 Uiso 1 1 calc R U . . .
C31 C 0.2142(3) 0.45678(18) 0.0248(5) 0.0508(10) Uani 1 1 d . . . . .
H31A H 0.171062 0.482025 0.030481 0.061 Uiso 1 1 calc R U . . .
C32 C 0.2262(2) 0.41924(16) 0.1394(4) 0.0432(9) Uani 1 1 d . . . . .
H32A H 0.191103 0.419227 0.223397 0.052 Uiso 1 1 calc R U . . .
O1W O 0.51570(18) 0.31699(12) 1.1677(3) 0.0524(7) Uani 1 1 d . . . . .
H1WA H 0.524150 0.332563 1.085431 0.079 Uiso 1 1 d R U . . .
H1WB H 0.484750 0.291363 1.144542 0.079 Uiso 1 1 d R U . . .

loop_
_atom_site_aniso_label
_atom_site_aniso_U_11
_atom_site_aniso_U_22
_atom_site_aniso_U_33
_atom_site_aniso_U_23
_atom_site_aniso_U_13
_atom_site_aniso_U_12
O1 0.0406(15) 0.0514(15) 0.0399(13) 0.0076(12) -0.0015(11) 0.0008(13)
O2 0.061(2) 0.075(2) 0.0493(16) -0.0158(16) -0.0116(14) -0.0092(16)
O3 0.098(3) 0.065(2) 0.072(2) 0.0033(18) -0.035(2) -0.007(2)
O4 0.0342(16) 0.072(2) 0.078(2) 0.0268(17) 0.0026(14) 0.0059(14)
O5 0.0404(14) 0.0552(15) 0.0273(11) -0.0031(11) 0.0028(10) -0.0059(12)
N1 0.0356(17) 0.0527(18) 0.0322(14) 0.0113(13) 0.0035(13) 0.0032(15)
N2 0.0458(19) 0.0373(16) 0.0592(19) -0.0011(15) -0.0018(16) -0.0079(15)
N4 0.0305(16) 0.0442(17) 0.0537(19) 0.0123(15) 0.0018(14) -0.0007(14)
N5 0.0408(17) 0.057(2) 0.0326(15) 0.0026(14) -0.0001(13) 0.0043(16)
N6 0.0476(19) 0.058(2) 0.0383(16) -0.0030(15) -0.0019(15) 0.0012(16)
N7 0.0361(16) 0.0462(17) 0.0268(13) -0.0002(12) 0.0008(12) -0.0041(14)
N8 0.0310(16) 0.0490(17) 0.0298(14) -0.0040(13) 0.0013(12) -0.0072(14)
C1 0.0298(18) 0.050(2) 0.0331(17) 0.0025(16) 0.0008(15) -0.0034(17)
C2 0.041(2) 0.0451(19) 0.0301(16) 0.0074(15) 0.0037(15) -0.0065(17)
C3 0.049(2) 0.056(2) 0.043(2) 0.0094(18) 0.0158(18) 0.004(2)
C4 0.040(2) 0.082(3) 0.059(3) 0.014(2) 0.012(2) 0.008(2)
C5 0.036(2) 0.072(3) 0.052(2) 0.022(2) 0.0089(18) 0.008(2)
C6 0.038(2) 0.054(2) 0.0377(19) -0.0035(17) 0.0000(16) -0.0055(18)
C7 0.049(2) 0.045(2) 0.0414(19) 0.0035(17) 0.0103(17) 0.0008(18)
C8 0.053(3) 0.070(3) 0.082(3) 0.031(3) 0.023(3) -0.002(2)
C9 0.055(3) 0.052(3) 0.121(5) 0.031(3) -0.004(3) -0.013(2)
C10 0.069(3) 0.037(2) 0.108(4) 0.001(2) -0.014(3) -0.016(2)
C11 0.051(2) 0.038(2) 0.050(2) 0.0050(17) -0.006(2) -0.0074(18)
N3 0.0368(18) 0.055(2) 0.065(2) 0.0110(18) 0.0074(16) 0.0031(16)
C12 0.038(4) 0.046(5) 0.087(7) 0.013(4) 0.009(4) 0.007(3)
C13 0.050(4) 0.045(4) 0.143(9) -0.009(5) 0.017(5) 0.011(3)
C14 0.036(2) 0.049(2) 0.060(2) 0.0133(19) 0.0066(18) 0.0032(18)
N3A 0.0368(18) 0.055(2) 0.065(2) 0.0110(18) 0.0074(16) 0.0031(16)
C12A 0.026(6) 0.043(7) 0.099(11) 0.025(8) 0.023(6) 0.009(5)
C13A 0.060(9) 0.057(8) 0.128(13) 0.020(9) -0.001(9) 0.015(7)
C14A 0.036(2) 0.049(2) 0.060(2) 0.0133(19) 0.0066(18) 0.0032(18)
C15 0.039(2) 0.045(2) 0.0366(18) 0.0073(15) 0.0016(15) 0.0012(16)
C16 0.0347(19) 0.0442(19) 0.0311(16) 0.0091(15) -0.0032(14) 0.0005(16)
C17 0.045(2) 0.049(2) 0.0344(18) -0.0041(16) -0.0029(17) -0.0040(18)
C18 0.0392(19) 0.0396(18) 0.0270(16) 0.0024(14) 0.0009(14) -0.0054(16)
C19 0.039(2) 0.047(2) 0.041(2) -0.0039(17) 0.0006(16) -0.0089(18)
C20 0.037(2) 0.048(2) 0.044(2) -0.0030(17) 0.0081(17) -0.0080(17)
C21 0.047(2) 0.045(2) 0.0372(19) 0.0033(16) 0.0060(17) -0.0046(18)
C22 0.043(2) 0.0410(19) 0.0310(17) 0.0036(15) 0.0043(15) -0.0016(17)
C23 0.0347(18) 0.0387(18) 0.0262(15) -0.0005(14) 0.0007(13) -0.0055(15)
C24 0.0400(19) 0.0419(19) 0.0248(15) 0.0022(14) -0.0014(14) -0.0016(16)
C25 0.0350(19) 0.046(2) 0.0284(16) 0.0030(15) -0.0014(14) -0.0050(16)
C26 0.0366(19) 0.048(2) 0.0334(17) 0.0033(16) -0.0061(15) -0.0070(17)
C27 0.038(2) 0.046(2) 0.0283(16) -0.0004(15) -0.0012(14) -0.0097(17)
C28 0.044(2) 0.059(2) 0.0306(18) -0.0037(17) 0.0034(16) -0.008(2)
C29 0.067(3) 0.070(3) 0.0279(18) 0.0056(19) 0.0023(18) -0.020(3)
C30 0.070(3) 0.057(2) 0.037(2) 0.0104(19) -0.009(2) -0.015(2)
C31 0.051(2) 0.050(2) 0.050(2) 0.0059(19) -0.0111(19) -0.0039(19)
C32 0.046(2) 0.049(2) 0.0347(18) 0.0043(16) -0.0035(16) -0.0067(18)
O1W 0.0556(18) 0.0624(18) 0.0390(14) 0.0047(13) 0.0028(12) -0.0008(14)

_geom_special_details            
; 
 All esds (except the esd in the dihedral angle between two l.s. planes) 
 are estimated using the full covariance matrix.  The cell esds are taken 
 into account individually in the estimation of esds in distances, angles 
 and torsion angles; correlations between esds in cell parameters are only 
 used when they are defined by crystal symmetry.  An approximate (isotropic) 
 treatment of cell esds is used for estimating esds involving l.s. planes. 
;

loop_
_geom_bond_atom_site_label_1
_geom_bond_atom_site_label_2
_geom_bond_distance
_geom_bond_site_symmetry_2
_geom_bond_publ_flag
O1 C1 1.234(4) . ?
O2 C6 1.235(5) . ?
O3 C11 1.230(5) . ?
O4 C14A 1.233(5) . ?
O4 C14 1.233(5) . ?
O5 C24 1.237(4) . ?
N1 C1 1.335(5) . ?
N1 C2 1.463(4) . ?
N1 C5 1.475(5) . ?
N2 C6 1.348(5) . ?
N2 C7 1.450(5) . ?
N2 C10 1.472(5) . ?
N4 C14A 1.333(5) . ?
N4 C14 1.333(5) . ?
N4 C15 1.446(5) . ?
N4 H4 0.8800 . ?
N5 C16 1.325(5) . ?
N5 N6 1.402(5) . ?
N6 C17 1.289(5) . ?
N7 C17 1.354(5) . ?
N7 C16 1.361(5) . ?
N7 C18 1.437(4) . ?
N8 C24 1.353(5) . ?
N8 C25 1.455(4) . ?
N8 H8 0.8800 . ?
C1 C25 1.532(5) . ?
C2 C6 1.514(6) . ?
C2 C3 1.539(5) . ?
C2 H2A 1.0000 . ?
C3 C4 1.512(6) . ?
C3 H3A 0.9900 . ?
C3 H3B 0.9900 . ?
C4 C5 1.523(6) . ?
C4 H4A 0.9900 . ?
C4 H4B 0.9900 . ?
C5 H5A 0.9900 . ?
C5 H5B 0.9900 . ?
C7 C11 1.513(6) . ?
C7 C8 1.524(6) . ?
C7 H7A 1.0000 . ?
C8 C9 1.502(8) . ?
C8 H8A 0.9900 . ?
C8 H8B 0.9900 . ?
C9 C10 1.531(8) . ?
C9 H9A 0.9900 . ?
C9 H9B 0.9900 . ?
C10 H10A 0.9900 . ?
C10 H10B 0.9900 . ?
C11 N3A 1.332(5) . ?
C11 N3 1.332(5) . ?
N3 C12 1.474(8) . ?
N3 H3 0.8800 . ?
C12 C13 1.516(10) . ?
C12 C14 1.527(8) . ?
C12 H12A 1.0000 . ?
C13 H13A 0.9800 . ?
C13 H13B 0.9800 . ?
C13 H13C 0.9800 . ?
N3A C12A 1.469(11) . ?
N3A H3A1 0.8800 . ?
C12A C13A 1.513(13) . ?
C12A C14A 1.519(11) . ?
C12A H12B 1.0000 . ?
C13A H13D 0.9800 . ?
C13A H13E 0.9800 . ?
C13A H13F 0.9800 . ?
C15 C16 1.492(5) . ?
C15 H15A 0.9900 . ?
C15 H15B 0.9900 . ?
C17 H17A 0.9500 . ?
C18 C19 1.385(5) . ?
C18 C23 1.398(5) . ?
C19 C20 1.385(5) . ?
C19 H19A 0.9500 . ?
C20 C21 1.384(6) . ?
C20 H20A 0.9500 . ?
C21 C22 1.379(5) . ?
C21 H21A 0.9500 . ?
C22 C23 1.407(5) . ?
C22 H22A 0.9500 . ?
C23 C24 1.479(5) . ?
C25 C26 1.532(5) . ?
C25 H25A 1.0000 . ?
C26 C27 1.497(5) . ?
C26 H26A 0.9900 . ?
C26 H26B 0.9900 . ?
C27 C32 1.387(6) . ?
C27 C28 1.395(5) . ?
C28 C29 1.396(6) . ?
C28 H28A 0.9500 . ?
C29 C30 1.369(7) . ?
C29 H29A 0.9500 . ?
C30 C31 1.378(6) . ?
C30 H30A 0.9500 . ?
C31 C32 1.393(6) . ?
C31 H31A 0.9500 . ?
C32 H32A 0.9500 . ?
O1W H1WA 0.8401 . ?
O1W H1WB 0.8399 . ?

loop_
_geom_angle_atom_site_label_1
_geom_angle_atom_site_label_2
_geom_angle_atom_site_label_3
_geom_angle
_geom_angle_site_symmetry_1
_geom_angle_site_symmetry_3
_geom_angle_publ_flag
C1 N1 C2 120.3(3) . . ?
C1 N1 C5 127.0(3) . . ?
C2 N1 C5 112.6(3) . . ?
C6 N2 C7 126.8(3) . . ?
C6 N2 C10 120.8(4) . . ?
C7 N2 C10 111.7(4) . . ?
C14A N4 C15 122.9(3) . . ?
C14 N4 C15 122.9(3) . . ?
C14 N4 H4 118.5 . . ?
C15 N4 H4 118.5 . . ?
C16 N5 N6 107.4(3) . . ?
C17 N6 N5 106.5(3) . . ?
C17 N7 C16 105.6(3) . . ?
C17 N7 C18 125.3(3) . . ?
C16 N7 C18 128.6(3) . . ?
C24 N8 C25 119.7(3) . . ?
C24 N8 H8 120.2 . . ?
C25 N8 H8 120.2 . . ?
O1 C1 N1 121.0(3) . . ?
O1 C1 C25 121.9(3) . . ?
N1 C1 C25 117.0(3) . . ?
N1 C2 C6 111.4(3) . . ?
N1 C2 C3 103.2(3) . . ?
C6 C2 C3 110.0(3) . . ?
N1 C2 H2A 110.7 . . ?
C6 C2 H2A 110.7 . . ?
C3 C2 H2A 110.7 . . ?
C4 C3 C2 103.5(3) . . ?
C4 C3 H3A 111.1 . . ?
C2 C3 H3A 111.1 . . ?
C4 C3 H3B 111.1 . . ?
C2 C3 H3B 111.1 . . ?
H3A C3 H3B 109.0 . . ?
C3 C4 C5 104.1(4) . . ?
C3 C4 H4A 110.9 . . ?
C5 C4 H4A 110.9 . . ?
C3 C4 H4B 110.9 . . ?
C5 C4 H4B 110.9 . . ?
H4A C4 H4B 109.0 . . ?
N1 C5 C4 102.5(3) . . ?
N1 C5 H5A 111.3 . . ?
C4 C5 H5A 111.3 . . ?
N1 C5 H5B 111.3 . . ?
C4 C5 H5B 111.3 . . ?
H5A C5 H5B 109.2 . . ?
O2 C6 N2 122.2(4) . . ?
O2 C6 C2 121.6(4) . . ?
N2 C6 C2 116.0(3) . . ?
N2 C7 C11 113.4(3) . . ?
N2 C7 C8 103.1(4) . . ?
C11 C7 C8 109.0(4) . . ?
N2 C7 H7A 110.4 . . ?
C11 C7 H7A 110.4 . . ?
C8 C7 H7A 110.4 . . ?
C9 C8 C7 103.4(4) . . ?
C9 C8 H8A 111.1 . . ?
C7 C8 H8A 111.1 . . ?
C9 C8 H8B 111.1 . . ?
C7 C8 H8B 111.1 . . ?
H8A C8 H8B 109.1 . . ?
C8 C9 C10 103.8(4) . . ?
C8 C9 H9A 111.0 . . ?
C10 C9 H9A 111.0 . . ?
C8 C9 H9B 111.0 . . ?
C10 C9 H9B 111.0 . . ?
H9A C9 H9B 109.0 . . ?
N2 C10 C9 103.5(4) . . ?
N2 C10 H10A 111.1 . . ?
C9 C10 H10A 111.1 . . ?
N2 C10 H10B 111.1 . . ?
C9 C10 H10B 111.1 . . ?
H10A C10 H10B 109.0 . . ?
O3 C11 N3A 121.7(4) . . ?
O3 C11 N3 121.7(4) . . ?
O3 C11 C7 119.8(4) . . ?
N3A C11 C7 118.4(4) . . ?
N3 C11 C7 118.4(4) . . ?
C11 N3 C12 127.6(6) . . ?
C11 N3 H3 116.2 . . ?
C12 N3 H3 116.2 . . ?
N3 C12 C13 111.8(7) . . ?
N3 C12 C14 113.7(5) . . ?
C13 C12 C14 111.1(6) . . ?
N3 C12 H12A 106.5 . . ?
C13 C12 H12A 106.5 . . ?
C14 C12 H12A 106.5 . . ?
C12 C13 H13A 109.5 . . ?
C12 C13 H13B 109.5 . . ?
H13A C13 H13B 109.5 . . ?
C12 C13 H13C 109.5 . . ?
H13A C13 H13C 109.5 . . ?
H13B C13 H13C 109.5 . . ?
O4 C14 N4 123.4(4) . . ?
O4 C14 C12 119.8(4) . . ?
N4 C14 C12 116.2(4) . . ?
C11 N3A C12A 109.1(10) . . ?
C11 N3A H3A1 125.5 . . ?
C12A N3A H3A1 125.5 . . ?
N3A C12A C13A 107.3(12) . . ?
N3A C12A C14A 114.5(9) . . ?
C13A C12A C14A 110.7(13) . . ?
N3A C12A H12B 108.0 . . ?
C13A C12A H12B 108.0 . . ?
C14A C12A H12B 108.0 . . ?
C12A C13A H13D 109.5 . . ?
C12A C13A H13E 109.5 . . ?
H13D C13A H13E 109.5 . . ?
C12A C13A H13F 109.5 . . ?
H13D C13A H13F 109.5 . . ?
H13E C13A H13F 109.5 . . ?
O4 C14A N4 123.4(4) . . ?
O4 C14A C12A 117.8(6) . . ?
N4 C14A C12A 117.8(5) . . ?
N4 C15 C16 111.4(3) . . ?
N4 C15 H15A 109.3 . . ?
C16 C15 H15A 109.3 . . ?
N4 C15 H15B 109.3 . . ?
C16 C15 H15B 109.3 . . ?
H15A C15 H15B 108.0 . . ?
N5 C16 N7 108.9(3) . . ?
N5 C16 C15 126.2(3) . . ?
N7 C16 C15 124.9(3) . . ?
N6 C17 N7 111.6(3) . . ?
N6 C17 H17A 124.2 . . ?
N7 C17 H17A 124.2 . . ?
C19 C18 C23 121.7(3) . . ?
C19 C18 N7 118.5(3) . . ?
C23 C18 N7 119.7(3) . . ?
C18 C19 C20 119.8(4) . . ?
C18 C19 H19A 120.1 . . ?
C20 C19 H19A 120.1 . . ?
C21 C20 C19 119.2(4) . . ?
C21 C20 H20A 120.4 . . ?
C19 C20 H20A 120.4 . . ?
C22 C21 C20 121.5(3) . . ?
C22 C21 H21A 119.2 . . ?
C20 C21 H21A 119.3 . . ?
C21 C22 C23 120.0(3) . . ?
C21 C22 H22A 120.0 . . ?
C23 C22 H22A 120.0 . . ?
C18 C23 C22 117.7(3) . . ?
C18 C23 C24 121.0(3) . . ?
C22 C23 C24 121.0(3) . . ?
O5 C24 N8 121.5(3) . . ?
O5 C24 C23 122.0(3) . . ?
N8 C24 C23 116.4(3) . . ?
N8 C25 C1 110.4(3) . . ?
N8 C25 C26 109.5(3) . . ?
C1 C25 C26 110.8(3) . . ?
N8 C25 H25A 108.7 . . ?
C1 C25 H25A 108.7 . . ?
C26 C25 H25A 108.7 . . ?
C27 C26 C25 111.9(3) . . ?
C27 C26 H26A 109.2 . . ?
C25 C26 H26A 109.2 . . ?
C27 C26 H26B 109.2 . . ?
C25 C26 H26B 109.2 . . ?
H26A C26 H26B 107.9 . . ?
C32 C27 C28 118.5(3) . . ?
C32 C27 C26 120.4(3) . . ?
C28 C27 C26 121.1(4) . . ?
C27 C28 C29 120.0(4) . . ?
C27 C28 H28A 120.0 . . ?
C29 C28 H28A 120.0 . . ?
C30 C29 C28 120.6(4) . . ?
C30 C29 H29A 119.7 . . ?
C28 C29 H29A 119.7 . . ?
C29 C30 C31 120.1(4) . . ?
C29 C30 H30A 119.9 . . ?
C31 C30 H30A 119.9 . . ?
C30 C31 C32 119.6(4) . . ?
C30 C31 H31A 120.2 . . ?
C32 C31 H31A 120.2 . . ?
C27 C32 C31 121.1(4) . . ?
C27 C32 H32A 119.4 . . ?
C31 C32 H32A 119.4 . . ?
H1WA O1W H1WB 103.3 . . ?

loop_
_geom_torsion_atom_site_label_1
_geom_torsion_atom_site_label_2
_geom_torsion_atom_site_label_3
_geom_torsion_atom_site_label_4
_geom_torsion
_geom_torsion_site_symmetry_1
_geom_torsion_site_symmetry_2
_geom_torsion_site_symmetry_3
_geom_torsion_site_symmetry_4
_geom_torsion_publ_flag
C16 N5 N6 C17 -0.4(4) . . . . ?
C2 N1 C1 O1 4.8(5) . . . . ?
C5 N1 C1 O1 -178.7(4) . . . . ?
C2 N1 C1 C25 -177.3(3) . . . . ?
C5 N1 C1 C25 -0.8(6) . . . . ?
C1 N1 C2 C6 -73.7(4) . . . . ?
C5 N1 C2 C6 109.3(4) . . . . ?
C1 N1 C2 C3 168.2(3) . . . . ?
C5 N1 C2 C3 -8.8(4) . . . . ?
N1 C2 C3 C4 28.6(4) . . . . ?
C6 C2 C3 C4 -90.4(4) . . . . ?
C2 C3 C4 C5 -38.1(5) . . . . ?
C1 N1 C5 C4 168.8(4) . . . . ?
C2 N1 C5 C4 -14.5(5) . . . . ?
C3 C4 C5 N1 32.2(5) . . . . ?
C7 N2 C6 O2 179.0(4) . . . . ?
C10 N2 C6 O2 -11.1(6) . . . . ?
C7 N2 C6 C2 -5.8(6) . . . . ?
C10 N2 C6 C2 164.1(4) . . . . ?
N1 C2 C6 O2 -25.6(5) . . . . ?
C3 C2 C6 O2 88.2(4) . . . . ?
N1 C2 C6 N2 159.2(3) . . . . ?
C3 C2 C6 N2 -87.0(4) . . . . ?
C6 N2 C7 C11 -89.8(5) . . . . ?
C10 N2 C7 C11 99.6(4) . . . . ?
C6 N2 C7 C8 152.5(4) . . . . ?
C10 N2 C7 C8 -18.2(5) . . . . ?
N2 C7 C8 C9 34.4(5) . . . . ?
C11 C7 C8 C9 -86.4(5) . . . . ?
C7 C8 C9 C10 -37.8(5) . . . . ?
C6 N2 C10 C9 -176.3(4) . . . . ?
C7 N2 C10 C9 -5.0(5) . . . . ?
C8 C9 C10 N2 26.6(5) . . . . ?
N2 C7 C11 O3 176.1(4) . . . . ?
C8 C7 C11 O3 -69.7(5) . . . . ?
N2 C7 C11 N3A -6.5(5) . . . . ?
C8 C7 C11 N3A 107.8(4) . . . . ?
N2 C7 C11 N3 -6.5(5) . . . . ?
C8 C7 C11 N3 107.8(4) . . . . ?
O3 C11 N3 C12 11.6(7) . . . . ?
C7 C11 N3 C12 -165.8(5) . . . . ?
C11 N3 C12 C13 141.6(7) . . . . ?
C11 N3 C12 C14 -91.5(8) . . . . ?
C15 N4 C14 O4 0.6(7) . . . . ?
C15 N4 C14 C12 -170.3(6) . . . . ?
N3 C12 C14 O4 163.1(6) . . . . ?
C13 C12 C14 O4 -69.6(9) . . . . ?
N3 C12 C14 N4 -25.6(10) . . . . ?
C13 C12 C14 N4 101.6(7) . . . . ?
O3 C11 N3A C12A 5.5(7) . . . . ?
C7 C11 N3A C12A -171.9(6) . . . . ?
C11 N3A C12A C13A 118.5(14) . . . . ?
C11 N3A C12A C14A -118.2(13) . . . . ?
C15 N4 C14A O4 0.6(7) . . . . ?
C15 N4 C14A C12A 168.9(11) . . . . ?
N3A C12A C14A O4 -177.2(10) . . . . ?
C13A C12A C14A O4 -55.7(17) . . . . ?
N3A C12A C14A N4 13.9(19) . . . . ?
C13A C12A C14A N4 135.4(12) . . . . ?
C14A N4 C15 C16 -102.8(4) . . . . ?
C14 N4 C15 C16 -102.8(4) . . . . ?
N6 N5 C16 N7 0.8(4) . . . . ?
N6 N5 C16 C15 178.4(3) . . . . ?
C17 N7 C16 N5 -0.9(4) . . . . ?
C18 N7 C16 N5 -174.0(3) . . . . ?
C17 N7 C16 C15 -178.5(3) . . . . ?
C18 N7 C16 C15 8.4(6) . . . . ?
N4 C15 C16 N5 21.3(5) . . . . ?
N4 C15 C16 N7 -161.5(3) . . . . ?
N5 N6 C17 N7 -0.2(4) . . . . ?
C16 N7 C17 N6 0.7(4) . . . . ?
C18 N7 C17 N6 174.1(3) . . . . ?
C17 N7 C18 C19 72.5(5) . . . . ?
C16 N7 C18 C19 -115.7(4) . . . . ?
C17 N7 C18 C23 -103.4(4) . . . . ?
C16 N7 C18 C23 68.4(5) . . . . ?
C23 C18 C19 C20 1.3(6) . . . . ?
N7 C18 C19 C20 -174.5(4) . . . . ?
C18 C19 C20 C21 -2.2(6) . . . . ?
C19 C20 C21 C22 0.1(6) . . . . ?
C20 C21 C22 C23 3.0(6) . . . . ?
C19 C18 C23 C22 1.7(5) . . . . ?
N7 C18 C23 C22 177.4(3) . . . . ?
C19 C18 C23 C24 -172.3(4) . . . . ?
N7 C18 C23 C24 3.4(5) . . . . ?
C21 C22 C23 C18 -3.8(5) . . . . ?
C21 C22 C23 C24 170.3(3) . . . . ?
C25 N8 C24 O5 -0.2(5) . . . . ?
C25 N8 C24 C23 -176.3(3) . . . . ?
C18 C23 C24 O5 45.5(5) . . . . ?
C22 C23 C24 O5 -128.3(4) . . . . ?
C18 C23 C24 N8 -138.4(3) . . . . ?
C22 C23 C24 N8 47.8(5) . . . . ?
C24 N8 C25 C1 -70.1(4) . . . . ?
C24 N8 C25 C26 167.6(3) . . . . ?
O1 C1 C25 N8 -28.4(5) . . . . ?
N1 C1 C25 N8 153.7(3) . . . . ?
O1 C1 C25 C26 93.2(4) . . . . ?
N1 C1 C25 C26 -84.7(4) . . . . ?
N8 C25 C26 C27 -72.1(4) . . . . ?
C1 C25 C26 C27 165.9(3) . . . . ?
C25 C26 C27 C32 -73.5(4) . . . . ?
C25 C26 C27 C28 105.3(4) . . . . ?
C32 C27 C28 C29 -1.9(6) . . . . ?
C26 C27 C28 C29 179.3(4) . . . . ?
C27 C28 C29 C30 1.5(6) . . . . ?
C28 C29 C30 C31 -0.4(6) . . . . ?
C29 C30 C31 C32 -0.2(6) . . . . ?
C28 C27 C32 C31 1.3(5) . . . . ?
C26 C27 C32 C31 -179.9(4) . . . . ?
C30 C31 C32 C27 -0.2(6) . . . . ?

loop_
_geom_hbond_atom_site_label_D
_geom_hbond_atom_site_label_H
_geom_hbond_atom_site_label_A
_geom_hbond_distance_DH
_geom_hbond_distance_HA
_geom_hbond_distance_DA
_geom_hbond_angle_DHA
_geom_hbond_site_symmetry_A
_geom_hbond_publ_flag
N4 H4 O1 0.88 2.07 2.816(4) 142.1 . yes
N8 H8 O1W 0.88 2.09 2.925(4) 158.4 1_554 yes
O1W H1WA N5 0.84 2.01 2.850(4) 179.7 . yes
O1W H1WB O3 0.84 2.05 2.887(5) 179.8 . yes

_refine_diff_density_max         0.231
_refine_diff_density_min         -0.208
_refine_diff_density_rms         0.048

_shelx_res_file                  
; 
TITL d1968a_a.res in P2(1)2(1)2 
    d1968a_a_sq.res 
    created by SHELXL-2018/3 at 13:29:12 on 11-Apr-2019 
REM Old TITL d1968a in P2(1)2(1)2 
  
REM SHELXT solution in P2(1)2(1)2 
REM R1 0.162,  Rweak 0.048,  Alpha 0.002,  Orientation as input 
REM Flack x = -0.173 ( 0.123 ) from Parsons' quotients 
REM Formula found by SHELXT:  C33 N9 O6 
  
CELL  1.54178  16.6343  24.6040   8.9243   90.000   90.000   90.000 
ZERR    4.000   0.0006   0.0009   0.0003    0.000    0.000    0.000 
LATT -1 
SYMM -X, -Y, Z 
SYMM 1/2-X, 1/2+Y, -Z 
SYMM 1/2+X, 1/2-Y, -Z 
SFAC C H N O 
UNIT 128 152 32 24 
TEMP -123.160 
SIZE 0.05 0.05 0.28 
DFIX  1.52 0.01 C12 C13 C12A C13A 
SADI 0.01 N3 C12 N3A C12A 
SADI 0.01 C12 C14 C12A C14A 
ACTA 
L.S. 5 0   49 
BOND $H 
CONF 
EXYZ N3 N3A 
EADP N3 N3A 
EXYZ C14 C14A 
EADP C14 C14A 
SIMU 0.01  C12 C13 C12A C13A 
HTAB 
FMAP 2 
PLAN 20 
HTAB N4 O1 
EQIV $1 x, y, z-1 
HTAB N8 O1W_$1 
EQIV $2 x-1/2, -y+1/2, -z+2 
HTAB C8 O4_$2 
HTAB C12A O3 
EQIV $3 x+1/2, -y+1/2, -z+1 
HTAB C15 O2_$3 
EQIV $4 x-1/2, -y+1/2, -z+1 
HTAB C26 O4_$4 
HTAB O1W N5 
HTAB O1W N6 
HTAB O1W O3 
ABIN 
WGHT    0.058300    0.851600 
EXTI    0.002824 
FVAR       0.59593   0.66761 
O1    4    0.381960    0.299708    0.571320    11.00000    0.04060    0.05140 = 
         0.03985    0.00757   -0.00154    0.00084 
O2    4    0.212244    0.223936    0.580284    11.00000    0.06066    0.07503 = 
         0.04931   -0.01575   -0.01160   -0.00924 
O3    4    0.409540    0.228797    1.087726    11.00000    0.09768    0.06452 = 
         0.07199    0.00332   -0.03464   -0.00667 
O4    4    0.630267    0.227494    0.825818    11.00000    0.03424    0.07234 = 
         0.07765    0.02685    0.00263    0.00591 
O5    4    0.422733    0.434624    0.581774    11.00000    0.04037    0.05515 = 
         0.02730   -0.00308    0.00277   -0.00594 
N1    3    0.257572    0.331601    0.607604    11.00000    0.03559    0.05268 = 
         0.03216    0.01130    0.00352    0.00316 
N2    3    0.253514    0.203482    0.815122    11.00000    0.04582    0.03732 = 
         0.05918   -0.00113   -0.00180   -0.00789 
N4    3    0.524180    0.271134    0.723202    11.00000    0.03054    0.04421 = 
         0.05371    0.01234    0.00180   -0.00066 
AFIX  43 
H4    2    0.471649    0.271292    0.711544    11.00000   -1.20000 
AFIX   0 
N5    3    0.544267    0.369419    0.887942    11.00000    0.04085    0.05747 = 
         0.03264    0.00263   -0.00013    0.00426 
N6    3    0.548465    0.424494    0.927411    11.00000    0.04757    0.05757 = 
         0.03835   -0.00296   -0.00193    0.00116 
N7    3    0.582740    0.416050    0.692109    11.00000    0.03611    0.04623 = 
         0.02681   -0.00017    0.00082   -0.00414 
N8    3    0.418963    0.382710    0.372837    11.00000    0.03103    0.04897 = 
         0.02978   -0.00401    0.00129   -0.00722 
AFIX  43 
H8    2    0.444596    0.369795    0.294270    11.00000   -1.20000 
AFIX   0 
C1    1    0.327358    0.330815    0.533778    11.00000    0.02985    0.04966 = 
         0.03315    0.00247    0.00080   -0.00338 
C2    1    0.246722    0.298458    0.742160    11.00000    0.04084    0.04507 = 
         0.03010    0.00741    0.00373   -0.00653 
AFIX  13 
H2A   2    0.292308    0.304057    0.813560    11.00000   -1.20000 
AFIX   0 
C3    1    0.167739    0.320328    0.808831    11.00000    0.04939    0.05567 = 
         0.04270    0.00940    0.01580    0.00370 
AFIX  23 
H3A   2    0.137670    0.291185    0.860887    11.00000   -1.20000 
H3B   2    0.178181    0.350303    0.880229    11.00000   -1.20000 
AFIX   0 
C4    1    0.122125    0.340456    0.673137    11.00000    0.04028    0.08232 = 
         0.05885    0.01383    0.01213    0.00822 
AFIX  23 
H4A   2    0.081458    0.367897    0.702061    11.00000   -1.20000 
H4B   2    0.094888    0.310051    0.621157    11.00000   -1.20000 
AFIX   0 
C5    1    0.186771    0.365552    0.574028    11.00000    0.03582    0.07217 = 
         0.05157    0.02236    0.00888    0.00809 
AFIX  23 
H5A   2    0.171970    0.363256    0.466767    11.00000   -1.20000 
H5B   2    0.196469    0.404047    0.600795    11.00000   -1.20000 
AFIX   0 
C6    1    0.237786    0.238847    0.703601    11.00000    0.03766    0.05429 = 
         0.03765   -0.00352    0.00004   -0.00553 
C7    1    0.284600    0.216319    0.962790    11.00000    0.04926    0.04498 = 
         0.04141    0.00348    0.01034    0.00079 
AFIX  13 
H7A   2    0.263308    0.252173    0.997579    11.00000   -1.20000 
AFIX   0 
C8    1    0.251563    0.170531    1.059885    11.00000    0.05327    0.07044 = 
         0.08167    0.03148    0.02303   -0.00155 
AFIX  23 
H8A   2    0.286390    0.164061    1.148055    11.00000   -1.20000 
H8B   2    0.196400    0.178842    1.094659    11.00000   -1.20000 
AFIX   0 
C9    1    0.251962    0.122427    0.956333    11.00000    0.05491    0.05160 = 
         0.12105    0.03097   -0.00447   -0.01257 
AFIX  23 
H9A   2    0.212996    0.094527    0.989715    11.00000   -1.20000 
H9B   2    0.306132    0.105877    0.950882    11.00000   -1.20000 
AFIX   0 
C10   1    0.227375    0.146444    0.804821    11.00000    0.06928    0.03675 = 
         0.10797    0.00124   -0.01424   -0.01555 
AFIX  23 
H10A  2    0.254839    0.127509    0.721390    11.00000   -1.20000 
H10B  2    0.168516    0.143964    0.789883    11.00000   -1.20000 
AFIX   0 
C11   1    0.375472    0.215706    0.970804    11.00000    0.05138    0.03819 = 
         0.04954    0.00495   -0.00566   -0.00735 
PART   1 
N3    3    0.416436    0.198818    0.851312    21.00000    0.03682    0.05507 = 
         0.06491    0.01103    0.00737    0.00306 
AFIX  43 
H3    2    0.389171    0.196338    0.767087    21.00000   -1.20000 
AFIX   0 
C12   1    0.502144    0.183795    0.843732    21.00000    0.03827    0.04638 = 
         0.08744    0.01316    0.00939    0.00676 
AFIX  13 
H12A  2    0.517965    0.172046    0.946868    21.00000   -1.20000 
AFIX   0 
C13   1    0.516057    0.135400    0.741865    21.00000    0.04986    0.04517 = 
         0.14286   -0.00904    0.01707    0.01132 
AFIX  33 
H13A  2    0.573521    0.126653    0.739685    21.00000   -1.50000 
H13B  2    0.485898    0.104056    0.779702    21.00000   -1.50000 
H13C  2    0.497746    0.144203    0.640352    21.00000   -1.50000 
AFIX   0 
C14   1    0.557425    0.231006    0.802213    21.00000    0.03561    0.04888 = 
         0.05952    0.01327    0.00662    0.00319 
PART   2 
N3A   3    0.416436    0.198818    0.851312   -21.00000    0.03682    0.05507 = 
         0.06491    0.01103    0.00737    0.00306 
AFIX  43 
H3A1  2    0.395660    0.191660    0.762800   -21.00000   -1.20000 
AFIX   0 
C12A  1    0.501858    0.194055    0.890967   -21.00000    0.02613    0.04338 = 
         0.09900    0.02472    0.02347    0.00939 
AFIX  13 
H12B  2    0.507711    0.203323    0.999522   -21.00000   -1.20000 
AFIX   0 
C13A  1    0.525391    0.135132    0.870668   -21.00000    0.06046    0.05744 = 
         0.12834    0.01964   -0.00117    0.01531 
AFIX  33 
H13D  2    0.582269    0.130502    0.896282   -21.00000   -1.50000 
H13E  2    0.492458    0.112288    0.936425   -21.00000   -1.50000 
H13F  2    0.516692    0.124430    0.766144   -21.00000   -1.50000 
AFIX   0 
C14A  1    0.557425    0.231006    0.802213   -21.00000    0.03561    0.04888 = 
         0.05952    0.01327    0.00662    0.00319 
PART   0 
C15   1    0.570579    0.314401    0.655821    11.00000    0.03911    0.04471 = 
         0.03662    0.00729    0.00158    0.00123 
AFIX  23 
H15A  2    0.550797    0.321106    0.552842    11.00000   -1.20000 
H15B  2    0.627616    0.303171    0.649092    11.00000   -1.20000 
AFIX   0 
C16   1    0.564638    0.365580    0.744780    11.00000    0.03471    0.04421 = 
         0.03113    0.00911   -0.00321    0.00053 
C17   1    0.571122    0.450264    0.808967    11.00000    0.04518    0.04915 = 
         0.03435   -0.00409   -0.00291   -0.00399 
AFIX  43 
H17A  2    0.578721    0.488494    0.804243    11.00000   -1.20000 
AFIX   0 
C18   1    0.601020    0.432331    0.541244    11.00000    0.03921    0.03956 = 
         0.02699    0.00239    0.00094   -0.00535 
C19   1    0.677031    0.452434    0.510765    11.00000    0.03860    0.04702 = 
         0.04080   -0.00386    0.00061   -0.00892 
AFIX  43 
H19A  2    0.717235    0.452274    0.586370    11.00000   -1.20000 
AFIX   0 
C20   1    0.694236    0.472780    0.369633    11.00000    0.03686    0.04754 = 
         0.04436   -0.00301    0.00808   -0.00799 
AFIX  43 
H20A  2    0.745599    0.487848    0.348643    11.00000   -1.20000 
AFIX   0 
C21   1    0.635667    0.470888    0.259551    11.00000    0.04675    0.04465 = 
         0.03723    0.00330    0.00601   -0.00463 
AFIX  43 
H21A  2    0.647446    0.484763    0.162667    11.00000   -1.20000 
AFIX   0 
C22   1    0.560628    0.449325    0.287324    11.00000    0.04264    0.04102 = 
         0.03099    0.00356    0.00430   -0.00156 
AFIX  43 
H22A  2    0.522253    0.446895    0.208770    11.00000   -1.20000 
AFIX   0 
C23   1    0.540877    0.430922    0.431940    11.00000    0.03465    0.03867 = 
         0.02617   -0.00054    0.00067   -0.00555 
C24   1    0.457348    0.415782    0.470623    11.00000    0.04000    0.04186 = 
         0.02480    0.00220   -0.00145   -0.00157 
C25   1    0.335140    0.368609    0.398196    11.00000    0.03497    0.04649 = 
         0.02842    0.00296   -0.00141   -0.00502 
AFIX  13 
H25A  2    0.304313    0.402690    0.418842    11.00000   -1.20000 
AFIX   0 
C26   1    0.300596    0.341777    0.257250    11.00000    0.03663    0.04816 = 
         0.03341    0.00326   -0.00612   -0.00698 
AFIX  23 
H26A  2    0.337652    0.312832    0.223080    11.00000   -1.20000 
H26B  2    0.248432    0.324611    0.282005    11.00000   -1.20000 
AFIX   0 
C27   1    0.288576    0.381880    0.133090    11.00000    0.03771    0.04611 = 
         0.02829   -0.00036   -0.00122   -0.00975 
C28   1    0.340385    0.383367    0.010246    11.00000    0.04434    0.05918 = 
         0.03064   -0.00374    0.00337   -0.00807 
AFIX  43 
H28A  2    0.384508    0.358929    0.004910    11.00000   -1.20000 
AFIX   0 
C29   1    0.327378    0.420777   -0.104860    11.00000    0.06725    0.07021 = 
         0.02792    0.00561    0.00229   -0.02009 
AFIX  43 
H29A  2    0.362046    0.421048   -0.189451    11.00000   -1.20000 
AFIX   0 
C30   1    0.265133    0.457080   -0.096991    11.00000    0.06984    0.05719 = 
         0.03702    0.01045   -0.00924   -0.01541 
AFIX  43 
H30A  2    0.257060    0.482530   -0.175619    11.00000   -1.20000 
AFIX   0 
C31   1    0.214161    0.456776    0.024786    11.00000    0.05143    0.05046 = 
         0.05045    0.00590   -0.01106   -0.00395 
AFIX  43 
H31A  2    0.171062    0.482025    0.030481    11.00000   -1.20000 
AFIX   0 
C32   1    0.226201    0.419245    0.139421    11.00000    0.04612    0.04879 = 
         0.03472    0.00426   -0.00345   -0.00671 
AFIX  43 
H32A  2    0.191103    0.419227    0.223397    11.00000   -1.20000 
AFIX   0 
O1W   4    0.515700    0.316993    1.167712    11.00000    0.05564    0.06240 = 
         0.03904    0.00475    0.00283   -0.00084 
AFIX   3 
H1WA  2    0.524150    0.332563    1.085431    11.00000   -1.50000 
H1WB  2    0.484750    0.291363    1.144542    11.00000   -1.50000 
  
AFIX   0 
HKLF 4 
  
  
  
  
REM  d1968a_a.res in P2(1)2(1)2 
REM wR2 = 0.127001, GooF = S = 1.05768, Restrained GooF = 1.05776 for all data 
REM R1 = 0.049592 for 5466 Fo > 4sig(Fo) and 0.062624 for all 6607 data 
REM 435 parameters refined using 40 restraints 
  
END 
  
WGHT      0.0581      0.8643 
  
REM Instructions for potential hydrogen bonds 
HTAB N4 O1 
HTAB N8 O1W_$1 
HTAB C8 O4_$2 
HTAB C12A O3 
HTAB C15 O2_$3 
HTAB C26 O4_$4 
HTAB O1W N5 
HTAB O1W N6 
HTAB O1W O3 
  
REM Highest difference peak  0.231,  deepest hole -0.208,  1-sigma level  0.048 
Q1    1   0.4481  0.1649  0.5900  11.00000  0.05    0.23 
Q2    1   0.5422  0.3926  0.5596  11.00000  0.05    0.18 
Q3    1   0.5001  0.4207  0.5914  11.00000  0.05    0.18 
Q4    1   0.1627  0.2263  0.6909  11.00000  0.05    0.18 
Q5    1   0.5834  0.4189  0.6084  11.00000  0.05    0.17 
Q6    1   0.2378  0.1736  0.6871  11.00000  0.05    0.17 
Q7    1   0.4181  0.4219  0.2452  11.00000  0.05    0.17 
Q8    1   0.5050  0.4284  0.4499  11.00000  0.05    0.17 
Q9    1  -0.0602  0.2860  0.6175  11.00000  0.05    0.17 
Q10   1   0.4993  0.4045  0.6394  11.00000  0.05    0.17 
Q11   1   0.5598  0.4322  0.4816  11.00000  0.05    0.17 
Q12   1   0.3880  0.3847  0.1725  11.00000  0.05    0.17 
Q13   1   0.4159  0.4468  0.3370  11.00000  0.05    0.17 
Q14   1   0.5121  0.3701  1.1765  11.00000  0.05    0.17 
Q15   1   0.3853  0.3305  0.3114  11.00000  0.05    0.16 
Q16   1   0.5643  0.3888  0.7206  11.00000  0.05    0.15 
Q17   1   0.4995  0.4168  0.8078  11.00000  0.05    0.15 
Q18   1   0.5451  0.4170  0.4301  11.00000  0.05    0.15 
Q19   1   0.1563  0.3164  0.3001  11.00000  0.05    0.15 
Q20   1   0.5443  0.4458  0.3900  11.00000  0.05    0.15 
;
_shelx_res_checksum              38482

_shelx_hkl_file                  
; 
   0   0   1  294.47   30.40 
   0   0   1  312.17   30.30 
   0   0  -1  326.97   30.40 
   0   0  -2    1.60    4.80 
   0   0  -2   -2.30    6.40 
   0   0   2   -2.10    6.00 
   0   0   3 1411.06  133.29 
   0   0  -3 1287.57  133.79 
   0   0  -3 1429.06  133.19 
   0   0  -4  475.85   47.00 
   0   0  -4  442.16   48.40 
   0   0  -5  350.76   39.90 
   0   0  -5  338.17   37.30 
   0   0  -6  266.07   27.80 
   0   0  -6  229.18   25.80 
   0   0   6  263.37   27.30 
   0   0   6  220.38   26.50 
   0   0  -6  223.38   27.90 
   0   0  -7  605.14   62.69 
   0   0  -7  604.04   63.89 
   0   0   7  632.74   63.89 
   0   0   7  698.93   64.29 
   0   0  -7  614.94   63.69 
   0   0  -8   21.30   12.50 
   0   0  -8   29.50   12.70 
   0   0  -8   11.40    9.90 
   0   0   8   26.30   12.60 
   0   0   8   42.40   13.40 
   0   0  -9   66.69   14.20 
   0   0  -9   47.80   11.20 
   0   0   9   90.49   13.90 
   0   0   9  112.09   15.00 
   0   0   9   49.10   13.00 
   0   0  -9   41.40   12.70 
   0   0 -10    3.30    6.80 
   0   0 -10    5.70    7.10 
   0   0  10   10.10    8.40 
   0   0  10  -15.20    7.70 
   0   0 -10    9.50    7.20 
   1   0   0    0.40    1.00 
   1   0   0    1.50    0.80 
  -1   0   0   -0.50    0.80 
   1   0   0    1.60    1.70 
  -1   0   0    0.90    1.50 
   1   0   1 1339.97  122.99 
   1   0  -1 1218.38  123.59 
   1   0  -1 1297.97  123.19 
  -1   0  -1 1368.56  122.99 
  -1   0   1 1223.98  123.09 
   1   0   1 1233.28  123.19 
   1   0   2 1937.61  195.78 
   1   0   2 1912.71  195.48 
   1   0  -2 2017.30  196.48 
  -1   0  -2 2123.89  195.58 
   1   0  -2 2181.68  195.88 
  -1   0  -3   91.09   13.70 
   1   0   3   90.39   12.90 
   1   0  -3   71.49   14.10 
  -1   0  -3  103.29   13.00 
   1   0  -3   81.69   11.90 
  -1   0  -4   11.50    7.40 
  -1   0  -4    7.80    6.50 
   1   0   4   19.50    9.90 
   1   0  -4   13.90   11.40 
   1   0  -4    9.10    7.80 
  -1   0  -4   19.10    9.90 
   1   0  -5  253.27   32.60 
  -1   0  -5  249.08   30.50 
   1   0  -5  236.98   28.60 
  -1   0  -5  252.47   28.40 
   1   0  -6  164.58   21.90 
  -1   0   6  150.08   21.10 
  -1   0  -6  176.38   22.20 
  -1   0  -6  175.88   20.00 
   1   0  -6  181.98   33.40 
   1   0   6  183.18   21.10 
  -1   0  -6  178.58   21.80 
  -1   0   6  206.28   22.40 
   1   0  -6  161.48   20.00 
   1   0   6  180.68   21.90 
   1   0   7   71.99   13.90 
  -1   0   7   76.09   14.50 
  -1   0  -7   78.89   15.00 
   1   0  -7   58.59   12.20 
   1   0  -7  105.09   15.10 
   1   0  -7   69.69   15.50 
  -1   0  -7   78.09   12.40 
  -1   0   7   68.79   14.30 
   1   0   7   60.69   13.80 
  -1   0  -7   55.09   14.10 
  -1   0  -8   23.60   13.00 
   1   0   8   32.10   13.70 
  -1   0  -8   10.80   11.80 
   1   0   8   22.60   12.50 
   1   0  -8   31.90   13.20 
  -1   0   8   -8.10   11.80 
   1   0  -8    7.60   13.70 
  -1   0  -8   33.50    9.90 
  -1   0   8   16.30   12.30 
   1   0  -8   14.40   10.00 
   1   0  -9   28.10   11.70 
   1   0  -9   46.90    9.90 
  -1   0   9   57.29   13.40 
  -1   0  -9   14.90    9.10 
  -1   0  -9    7.10   10.60 
  -1   0   9   15.60   10.80 
   1   0  -9   27.70   11.90 
   1   0   9   27.80   12.20 
  -1   0  -9   23.30   10.60 
   1   0   9   42.70   11.80 
  -1   0   9   16.70   11.60 
  -1   0 -10   23.90    7.60 
   1   0 -10   24.50    8.40 
  -1   0  10   37.30    9.50 
  -1   0 -10   23.10    8.30 
   1   0 -10   43.00    8.70 
   1   0  10   35.80    9.70 
  -1   0 -10   33.80    7.50 
  -1   0  10   29.50    8.80 
   1   0  10   19.30    8.30 
  -1   0  10   26.20    9.40 
   1   0 -10   43.00    8.10 
  -2   0   0  163.58   16.30 
   2   0   0  153.58   17.20 
  -2   0   0  165.08   17.50 
   2   0   0  175.88   16.60 
   2   0   0  172.38   16.30 
  -2   0  -1 1402.36  128.59 
  -2   0   1 1268.17  128.89 
   2   0   1 1319.07  128.99 
  -2   0   1 1322.27  129.69 
   2   0  -1 1408.46  128.99 
   2   0  -1 1316.27  129.69 
   2   0   2 2135.79  204.08 
   2   0   2 1991.20  203.48 
   2   0  -2 2121.69  205.08 
   2   0  -2 2151.88  204.08 
  -2   0  -2 2198.98  203.68 
  -2   0  -3  286.77   28.00 
   2   0  -3  278.17   28.90 
  -2   0  -3  246.38   28.30 
   2   0  -3  273.87   31.30 
   2   0   3  272.07   29.00 
  -2   0  -4   83.89   15.40 
   2   0  -4   97.09   14.30 
  -2   0  -4   97.49   13.20 
   2   0   4  115.79   16.30 
   2   0  -4   85.39   17.60 
  -2   0  -4  115.29   14.00 
  -2   0   5  363.06   46.70 
  -2   0  -5  367.26   38.60 
   2   0  -5  376.86   44.10 
  -2   0  -5  348.07   37.90 
   2   0  -5  354.76   39.40 
   2   0   5  384.36   40.70 
   2   0   6   13.50    9.60 
   2   0  -6    3.30    7.10 
   2   0  -6   47.00   17.40 
   2   0  -6   15.20   10.30 
   2   0  -6   -7.00   15.80 
  -2   0   6   16.40    9.40 
  -2   0  -6    1.50   10.00 
   2   0   6    9.00    9.40 
  -2   0   6   -2.20    8.20 
  -2   0   6  -18.20   16.40 
  -2   0  -6    5.80    7.60 
  -2   0  -6    4.40    9.70 
   2   0   7   -6.40   10.70 
  -2   0  -7    3.80    8.20 
   2   0   7   11.60   10.90 
   2   0  -7    9.90   10.90 
  -2   0   7    6.90   10.60 
   2   0  -7   -7.90    8.70 
  -2   0  -7   25.20   12.20 
  -2   0   7    2.30   10.10 
   2   0  -7   12.10   12.80 
  -2   0  -7  -10.20   10.20 
  -2   0  -7    6.70    9.50 
   2   0   8  136.19   20.90 
  -2   0  -8  166.98   22.10 
   2   0  -8  170.18   20.40 
  -2   0  -8  179.18   19.60 
   2   0  -8  162.88   22.10 
  -2   0   8  185.18   22.70 
   2   0   8  139.69   21.10 
   2   0  -8  149.88   22.00 
  -2   0   8  168.28   21.70 
  -2   0  -8  162.38   20.70 
  -2   0  -8  124.09   19.80 
   2   0  -9   24.80   11.60 
  -2   0  -9   11.90    9.50 
  -2   0   9   -3.50   11.40 
  -2   0  -9    8.30   10.40 
  -2   0  -9    0.60    8.10 
   2   0  -9    5.40    9.10 
   2   0   9    8.80   11.60 
  -2   0   9   -0.10    9.90 
   2   0   9   15.40   10.50 
   2   0  -9   -9.40   11.10 
  -2   0   9   13.10   11.40 
   2   0  10   10.10    8.20 
  -2   0 -10    2.70    6.80 
  -2   0  10    4.00    7.90 
   2   0 -10   -1.50    6.30 
  -2   0 -10    8.40    6.00 
   2   0  10   10.20    7.90 
   2   0 -10    3.90    6.50 
  -2   0  10    7.30    7.10 
  -2   0  10   16.20    8.80 
   2   0 -10    5.00    8.00 
  -2   0 -10    0.20    7.20 
   3   0   0    5.00    2.80 
   3   0   0    4.50    6.00 
  -3   0   0    5.90    2.50 
   3   0   0    0.20    3.60 
  -3   0   0   -4.00    4.90 
  -3   0  -1 3433.56  322.07 
   3   0  -1 3316.27  322.67 
   3   0   1 3285.77  321.77 
   3   0   1 3367.36  321.77 
   3   0  -1 3414.26  321.67 
  -3   0   1 3300.57  322.47 
  -3   0   2  339.17   38.00 
   3   0  -2  336.57   37.40 
   3   0  -2  359.96   35.40 
   3   0   2  343.97   35.70 
  -3   0  -2  352.86   34.30 
   3   0   3  878.71   87.59 
  -3   0  -3  910.31   86.69 
  -3   0   3  896.51   89.59 
   3   0  -3  890.51   87.49 
  -3   0  -3  894.21   86.99 
   3   0  -3  877.91   89.39 
  -3   0  -4  346.37   37.00 
   3   0  -4  364.96   37.90 
  -3   0  -4  350.96   36.60 
  -3   0   4  390.06   44.00 
   3   0   4  352.26   38.70 
   3   0  -4  344.67   41.60 
   3   0  -5   88.99   21.50 
   3   0  -5   49.30   11.70 
  -3   0   5   86.39   20.20 
  -3   0  -5   79.09   14.50 
  -3   0  -5   67.59   11.90 
   3   0   5   67.89   15.00 
   3   0   6   88.59   15.70 
  -3   0  -6   69.49   13.20 
  -3   0  -6   57.59   13.30 
   3   0  -6   59.49   13.50 
  -3   0   6   71.09   13.40 
  -3   0  -6   65.09   11.10 
  -3   0   6   50.59   21.70 
   3   0  -6   59.89   11.60 
   3   0   6   91.59   14.00 
   3   0  -6   59.99   14.80 
  -3   0  -6   75.99   13.30 
   3   0  -6  103.49   23.20 
  -3   0  -6   83.09   13.00 
  -3   0   6  107.19   14.00 
   3   0   6   89.09   14.40 
   3   0   6   65.59   16.70 
  -3   0   6   73.69   13.00 
  -3   0   7  731.93   64.69 
   3   0   7  641.44   64.49 
   3   0  -7  664.73   63.29 
  -3   0  -7  593.44   64.09 
   3   0   7  625.94   64.19 
   3   0  -7  594.14   63.79 
  -3   0  -7  580.94   62.69 
  -3   0   7  616.54   64.09 
   3   0  -7  615.74   64.19 
  -3   0  -7  617.34   63.69 
  -3   0   7  665.33   65.29 
  -3   0  -7  659.33   63.89 
   3   0  -8   53.09   14.80 
  -3   0  -8   35.40   10.40 
   3   0   8   56.99   13.30 
   3   0  -8   53.49   12.40 
   3   0  -8   25.40   15.10 
   3   0   8   55.19   13.80 
  -3   0  -8   71.79   14.30 
  -3   0  -8   43.10   11.90 
   3   0   8   82.49   18.70 
  -3   0   8   77.69   14.60 
  -3   0  -8   37.20   12.00 
  -3   0   8   55.59   14.00 
  -3   0  -9   36.60   10.30 
   3   0  -9   17.80    9.50 
   3   0  -9   43.40   12.20 
  -3   0   9   11.20   10.70 
  -3   0   9   37.00   12.70 
  -3   0  -9   12.60    8.50 
  -3   0   9   52.69   12.60 
   3   0   9   19.00   10.40 
  -3   0  -9   22.20    8.60 
  -3   0  -9   35.10   10.00 
   3   0   9   17.50   11.40 
   3   0  -9   30.30   12.50 
   3   0 -10   -5.10    6.60 
  -3   0  10   21.10    8.10 
  -3   0  10    9.60    8.20 
  -3   0  10    6.10    7.40 
   3   0  10   17.60    8.00 
   3   0 -10    6.40    8.40 
   3   0  10    7.20    7.80 
  -3   0  10    9.30    8.60 
  -3   0 -10   11.10    7.10 
  -3   0 -10   -0.50    6.30 
  -3   0 -10   15.90    6.00 
   3   0 -10   16.00    6.90 
   4   0   0 3513.85  345.97 
   4   0   0 3893.11  345.37 
  -4   0   0 3349.06  344.77 
   4   0   0 3621.34  344.87 
  -4   0   0 3620.24  345.87 
   4   0  -1 4074.59  393.36 
   4   0   1 3800.12  392.26 
  -4   0  -1 4152.08  392.56 
   4   0   1 4176.78  392.26 
   4   0  -1 4177.58  392.06 
  -4   0   1 4142.09  393.06 
   4   0   2  745.33   75.09 
  -4   0  -2  719.33   73.69 
   4   0  -2  786.92   74.99 
  -4   0   2  780.92   76.99 
   4   0  -2  803.42   77.29 
  -4   0  -3   33.70    8.20 
   4   0  -3   29.20   13.40 
   4   0   3   37.10   10.20 
  -4   0  -3   37.20    6.40 
   4   0  -3   33.20    8.90 
  -4   0   3   34.10   13.20 
  -4   0  -4   77.99   11.00 
   4   0  -4   85.09   14.00 
   4   0   4   99.09   15.70 
   4   0  -4   79.49   19.70 
  -4   0  -4   75.29   12.70 
  -4   0   4   60.89   17.10 
  -4   0   5   29.70   16.90 
   4   0  -5   38.10   10.00 
   4   0   5   42.70   13.30 
   4   0  -5   46.90   18.40 
  -4   0  -5   14.20    9.80 
  -4   0  -6   80.29   13.00 
  -4   0  -6   72.39   13.60 
  -4   0  -6   69.99   13.80 
  -4   0  -6   87.29   12.40 
   4   0   6   56.89   12.50 
   4   0  -6   79.29   11.90 
  -4   0   6   65.89   12.70 
  -4   0  -6   62.29   13.90 
   4   0  -6   86.49   14.80 
   4   0  -6   90.49   22.90 
  -4   0   6   36.30   20.70 
  -4   0  -6   66.99   11.30 
  -4   0   6   68.59   12.60 
   4   0   6   63.09   14.80 
   4   0  -6   56.19   14.00 
   4   0   6   78.79   13.50 
   4   0   6   67.79   17.40 
   4   0  -7   26.30   12.80 
  -4   0   7   27.60   11.30 
  -4   0  -7   34.50   10.60 
   4   0  -7   14.50   10.60 
   4   0  -7   25.80   14.00 
   4   0   7   33.70   10.90 
  -4   0  -7   34.70    9.30 
  -4   0  -7   39.80   11.90 
  -4   0  -7   22.30    9.60 
  -4   0   7   45.90   12.80 
  -4   0   7   30.60   11.40 
   4   0   7   26.30   14.10 
   4   0   7   12.50   11.50 
   4   0  -8   24.40   13.80 
   4   0  -8    8.90   10.60 
   4   0   8    3.90   13.20 
  -4   0   8   15.10   11.50 
  -4   0  -8   23.00   11.80 
   4   0  -8   15.30   14.60 
  -4   0  -8    9.10   10.10 
   4   0   8   20.50   11.90 
   4   0   8   25.80   11.40 
  -4   0   8   23.30   12.30 
  -4   0  -8   20.50    9.90 
  -4   0  -8   11.20    8.90 
   4   0  -8    5.70   12.10 
   4   0   9   88.29   14.90 
   4   0  -9   72.59   15.00 
  -4   0   9   72.99   14.50 
  -4   0   9   78.09   15.00 
  -4   0  -9   99.49   14.00 
  -4   0   9  107.89   15.90 
   4   0  -9   73.49   15.70 
   4   0   9  103.09   15.90 
   4   0  -9   99.29   13.90 
  -4   0  -9  113.89   12.80 
  -4   0  -9  103.69   14.00 
  -4   0  -9  109.89   15.00 
   4   0 -10   -5.70    6.60 
  -4   0  10    0.90    7.20 
  -4   0 -10   -0.80    6.50 
  -4   0  10    7.70    8.70 
   4   0  10    7.50    6.90 
   4   0  10   -8.30    6.70 
  -4   0 -10    3.70    5.70 
   4   0 -10   -3.80    6.40 
   4   0 -10   -6.30    8.00 
  -4   0  10   -9.20    6.20 
  -4   0  10    3.80    7.20 
  -4   0 -10    2.70    5.60 
   5   0   0    0.50    3.60 
   5   0   0   -3.20    5.40 
  -5   0   0   -3.10    6.80 
  -5   0   0    1.30    2.90 
   5   0   0   -6.30    8.30 
   5   0   1 1824.12  186.28 
  -5   0   1 1932.21  187.18 
  -5   0  -1 2034.80  186.68 
   5   0  -1 1966.60  187.68 
   5   0  -1 1981.70  185.78 
  -5   0  -1 1758.62  185.08 
   5   0   1 2029.10  186.18 
   5   0   2 1034.60  102.89 
  -5   0   2 1040.50  104.49 
  -5   0  -2 1018.10  102.49 
   5   0  -2 1085.09  104.99 
   5   0  -2 1082.99  102.69 
   5   0  -3  138.29   18.40 
  -5   0   3   99.79   19.00 
  -5   0  -3  164.18   17.70 
   5   0   3  130.59   18.20 
   5   0  -3  142.79   23.50 
   5   0  -4 3508.35  342.17 
  -5   0  -4 3641.74  338.57 
   5   0   4 3412.16  339.47 
  -5   0   4 3669.73  341.97 
   5   0  -4 3357.96  339.17 
   5   0   5    6.10   11.90 
   5   0  -5    9.30   16.70 
  -5   0  -5    5.20    9.40 
   5   0  -5    2.50    9.70 
  -5   0   5    6.80   16.10 
   5   0   6   38.90   12.90 
  -5   0  -6   34.20   10.50 
   5   0  -6   -3.10   11.90 
   5   0   6   21.50   14.50 
  -5   0  -6    7.20    8.70 
  -5   0   6   11.10    9.70 
   5   0  -6   44.30   20.40 
   5   0   6   12.70   10.70 
  -5   0  -6   15.30    9.60 
   5   0  -6   26.30    9.60 
  -5   0  -6    6.90    7.80 
  -5   0   6    1.50    9.90 
  -5   0  -6   30.90   11.50 
  -5   0  -6   14.00    8.50 
  -5   0   6   -8.20   17.90 
   5   0   6   -2.40    9.10 
   5   0  -7   82.69   15.20 
  -5   0   7   72.09   14.90 
   5   0   7   62.79   17.40 
  -5   0  -7   71.49   14.50 
   5   0   7   84.39   15.10 
  -5   0  -7   66.59   11.50 
   5   0  -7   81.19   14.00 
  -5   0  -7   78.59   17.00 
  -5   0  -7   64.59   12.00 
  -5   0   7   56.29   14.80 
   5   0   7   54.29   13.00 
  -5   0  -7   40.90   12.10 
  -5   0   7   59.49   13.70 
   5   0  -7   90.19   16.60 
  -5   0   8  139.29   17.70 
   5   0  -8  128.79   18.50 
  -5   0  -8  129.09   15.60 
  -5   0  -8  109.99   17.20 
   5   0   8  108.09   18.10 
   5   0   8  140.29   19.10 
  -5   0  -8  130.79   18.40 
  -5   0   8  112.99   18.10 
   5   0  -8  138.49   18.10 
  -5   0   8   89.89   17.30 
   5   0   8  134.89   19.60 
  -5   0  -8  101.69   16.10 
   5   0  -8  122.79   20.10 
   5   0   8  135.89   18.00 
  -5   0  -9   76.99   10.30 
  -5   0  -9   64.89   11.00 
  -5   0  -9   48.70   10.70 
   5   0  -9   76.59   12.40 
   5   0   9   41.40   11.90 
  -5   0   9   67.69   13.10 
   5   0  -9   70.59   14.40 
   5   0  -9   56.79   12.80 
  -5   0   9   91.09   13.50 
   5   0   9   65.59   12.60 
  -5   0   9   76.89   14.40 
  -5   0  -9   68.39   12.70 
  -5   0  10   22.10    8.50 
  -5   0  10   13.40    7.10 
   5   0 -10   27.20    8.50 
  -5   0 -10   14.60    6.20 
  -5   0 -10   19.00    6.60 
   5   0  10   22.00    7.90 
   5   0 -10    3.60    6.20 
   5   0 -10   11.20    7.10 
  -5   0  10    6.50    6.20 
  -5   0 -10    8.90    5.50 
   6   0   0 5686.73  501.85 
  -6   0   0 5455.05  502.75 
  -6   0   0 4548.45  500.95 
   6   0   0 5244.08  502.95 
   6   0   1   18.60    8.40 
  -6   0  -1   24.20    7.60 
  -6   0   1   25.30   10.20 
   6   0  -1   15.50    5.90 
  -6   0  -1   20.30    8.40 
   6   0  -1   18.60   11.70 
   6   0   1   25.50    7.40 
  -6   0  -2  452.85   50.19 
   6   0  -2  537.65   55.29 
  -6   0  -2  528.65   51.59 
  -6   0   2  548.75   54.69 
   6   0   2  515.55   52.19 
   6   0  -2  527.85   51.49 
  -6   0  -3  869.91   85.79 
   6   0  -3  860.41   86.09 
   6   0  -3  860.41   89.49 
  -6   0   3  878.91   89.49 
   6   0   3  885.61   86.89 
   6   0  -4  298.77   40.20 
  -6   0   4  323.47   41.70 
  -6   0  -4  305.67   33.80 
   6   0  -4  317.17   34.20 
   6   0   4  287.87   35.40 
   6   0   5    6.10   14.00 
   6   0   5   19.50   13.60 
   6   0  -5    0.00   12.40 
  -6   0  -5   17.30    8.80 
  -6   0  -5    8.20    8.60 
   6   0  -5   21.00   18.50 
  -6   0  -5    0.20    7.80 
  -6   0   5   -9.90   15.50 
  -6   0  -5    4.30   10.90 
   6   0  -5   13.20    9.40 
   6   0  -6  151.08   29.10 
   6   0   6  136.79   21.10 
  -6   0  -6  137.99   17.60 
   6   0  -6   90.49   18.60 
  -6   0   6  117.99   27.10 
   6   0   6  108.89   21.60 
  -6   0  -6  145.19   15.50 
  -6   0   6  105.79   17.00 
  -6   0  -6   92.89   16.40 
  -6   0  -6  141.09   17.10 
  -6   0  -6  128.89   19.80 
   6   0   6  142.09   18.30 
  -6   0  -6   99.89   15.70 
   6   0  -6  134.69   17.20 
   6   0  -7   -8.20   12.70 
  -6   0  -7   15.80   11.90 
  -6   0  -7   -1.60    8.80 
   6   0   7  -11.10   12.90 
  -6   0   7   -8.20   10.10 
  -6   0   7  -11.90   12.30 
  -6   0  -7  -13.50   10.50 
   6   0  -7   -5.50   10.60 
  -6   0  -7    0.50    9.30 
   6   0   7    0.30   15.10 
   6   0   7    1.50   11.10 
  -6   0   7    1.10   11.40 
  -6   0  -7   13.90    8.40 
   6   0  -7    4.80   15.50 
  -6   0  -8   82.09   12.60 
   6   0  -8   54.69   16.40 
  -6   0  -8   68.69   13.90 
  -6   0  -8   75.49   11.10 
   6   0  -8   58.49   14.80 
  -6   0   8   48.10   12.90 
   6   0  -8   57.49   13.30 
   6   0   8   42.60   13.30 
  -6   0   8   74.99   13.70 
   6   0   8   53.59   15.80 
  -6   0  -8   60.89   12.20 
   6   0   8   62.39   15.70 
  -6   0   8   76.49   14.80 
   6   0   8   58.69   15.30 
   6   0  -9   -8.50    8.50 
  -6   0   9   11.10    8.50 
   6   0  -9    9.70   10.00 
   6   0   9   25.00    9.60 
  -6   0  -9   10.80    7.50 
  -6   0   9   -0.40   10.50 
  -6   0  -9    5.40    7.60 
  -6   0   9    8.50    8.60 
  -6   0   9   14.80   14.00 
  -6   0  -9    0.40    9.00 
   6   0  -9   16.50   11.90 
  -6   0  10  -12.50    6.90 
  -6   0 -10    5.30    5.60 
   6   0 -10   -4.20    7.40 
  -6   0 -10   -4.90    5.20 
   6   0 -10   -1.80    5.50 
   6   0  10    6.40    6.80 
  -6   0  10    1.50    6.30 
   7   0   0    7.50    7.00 
   7   0   0    2.20   10.80 
  -7   0   0    0.50    8.80 
   7   0  -1   90.49   12.40 
   7   0  -1  101.89   14.00 
   7   0  -1  104.49   19.00 
   7   0   1  103.49   14.10 
  -7   0  -1  115.49   14.10 
  -7   0  -1   94.59   15.10 
  -7   0   1   86.89   15.20 
   7   0   1   92.79   16.40 
   7   0  -2  612.64   63.99 
  -7   0   2  666.83   67.39 
   7   0   2  649.93   64.99 
  -7   0  -2  650.13   64.19 
   7   0  -2  648.14   68.29 
   7   0  -3   28.80    9.40 
   7   0  -3   48.20   17.90 
   7   0   3   46.70   13.20 
  -7   0   3   18.90   13.30 
  -7   0  -3   32.80   10.10 
  -7   0   4    4.90   15.10 
   7   0  -4    8.70    8.80 
  -7   0  -4   -4.10   10.10 
   7   0   4    3.90   12.20 
   7   0  -4   24.00   18.00 
  -7   0  -5   22.20    8.40 
   7   0  -5   19.10   18.00 
   7   0  -5   17.30    9.80 
  -7   0  -5   33.80    7.80 
  -7   0  -5   -0.50    8.30 
  -7   0  -5   24.70    9.30 
  -7   0   5   25.40   11.80 
  -7   0  -5   16.90   11.20 
  -7   0   5   25.40   15.30 
   7   0   5   21.70   14.90 
  -7   0  -5   37.70    9.30 
   7   0   5   19.80   14.50 
  -7   0   5    9.80    9.90 
  -7   0   5   24.00   18.30 
   7   0  -6   74.69   13.70 
   7   0  -6   39.50   16.80 
  -7   0   6   76.49   16.30 
  -7   0  -6   64.99   16.80 
  -7   0  -6   95.99   13.80 
  -7   0  -6   65.69   12.50 
   7   0   6   96.09   15.80 
  -7   0  -6   60.09   12.60 
  -7   0  -6   93.69   11.80 
  -7   0  -6   71.19   13.30 
   7   0   6   70.09   15.10 
   7   0   6  107.89   19.50 
   7   0  -7   79.39   15.10 
  -7   0   7   60.79   16.80 
  -7   0  -7   84.19   16.20 
  -7   0  -7   60.49   13.20 
   7   0   7   76.49   15.50 
   7   0   7   92.09   18.50 
   7   0  -7   86.09   19.00 
  -7   0  -7   76.19   12.00 
   7   0   7   49.80   15.90 
  -7   0  -7   81.59   14.10 
  -7   0   7   72.59   14.40 
   7   0  -7  111.79   18.30 
  -7   0  -7   75.19   15.10 
  -7   0  -8   -0.50    8.80 
  -7   0   8    7.10   10.00 
   7   0   8    9.50   10.20 
   7   0   8    4.90   13.50 
  -7   0  -8   11.90   10.50 
  -7   0   8   11.80   11.90 
   7   0  -8   26.90   12.50 
  -7   0   8   -0.20   11.10 
   7   0   8   -3.30   12.40 
   7   0  -8   45.20   14.90 
  -7   0  -8   11.00    9.00 
   7   0  -8   -1.60   10.40 
   7   0  -9    0.60    8.30 
   7   0   9   19.90    9.10 
   7   0  -9   -2.90   10.40 
  -7   0  -9   12.60    6.90 
  -7   0  -9    8.00    7.30 
  -7   0   9  -20.90    9.80 
  -7   0   9    9.20    8.00 
   7   0  -9    3.10    9.10 
   7   0   9    3.00    8.50 
  -7   0   9    9.70    9.00 
  -7   0  -9    9.00    8.30 
   7   0 -10   44.20   10.40 
  -7   0  10   46.80   10.90 
   7   0 -10   51.89   10.00 
   8   0   0  194.68   27.10 
   8   0   0  200.58   23.20 
  -8   0   0  224.28   27.80 
  -8   0   0  154.18   22.00 
   8   0  -1 1360.26  133.19 
   8   0  -1 1383.76  129.89 
  -8   0  -1 1363.96  129.89 
  -8   0   1 1339.17  132.19 
  -8   0  -1 1409.86  131.89 
   8   0   1 1193.78  132.09 
   8   0   1 1308.07  130.39 
   8   0  -2  160.38   21.30 
   8   0  -2  207.28   30.60 
  -8   0  -2  172.38   22.40 
  -8   0   2  194.58   28.00 
   8   0   2  171.88   24.20 
   8   0  -3   29.70    9.20 
  -8   0  -3    3.10    9.80 
   8   0  -3   45.40   18.70 
   8   0   3   13.30   12.10 
  -8   0   3   32.10   15.50 
  -8   0  -4   53.19   10.00 
  -8   0  -4   39.90    9.50 
   8   0  -4   45.60   19.90 
  -8   0   4   53.39   18.10 
  -8   0   4   42.80   17.80 
  -8   0   4   47.50   14.10 
   8   0   4   31.80   13.80 
  -8   0   4   50.49   11.50 
   8   0  -4   54.49   12.30 
   8   0   4   54.49   16.80 
  -8   0  -4   59.69   14.00 
   8   0   4   77.09   12.10 
   8   0  -5   35.90   19.90 
   8   0   5   16.60   13.70 
  -8   0   5   25.80    9.90 
  -8   0   5   14.00   17.90 
  -8   0   5    7.80   12.00 
  -8   0  -5   13.30    9.40 
  -8   0  -5    8.90    7.90 
   8   0   5   11.60   10.50 
   8   0  -5    6.90    9.80 
   8   0   5   13.80   15.60 
  -8   0  -5   17.90    8.70 
  -8   0   5  -13.60   16.80 
  -8   0  -5    3.40    8.70 
  -8   0  -5   -1.80   11.90 
   8   0   6   78.09   19.10 
   8   0  -6   49.30   12.90 
  -8   0   6    7.30   14.20 
  -8   0  -6   61.59   16.30 
  -8   0  -6   48.10   12.50 
   8   0   6   24.40   20.40 
  -8   0  -6   53.79   11.40 
  -8   0  -6   42.70   11.30 
  -8   0   6   57.09   16.10 
   8   0   6   75.39   15.00 
   8   0  -6   58.79   16.90 
  -8   0  -6   33.80   10.60 
  -8   0   7   38.20   15.80 
   8   0   7   83.09   16.30 
  -8   0  -7   46.60   13.60 
  -8   0  -7   70.59   16.30 
   8   0  -7   69.29   18.60 
  -8   0  -7   73.19   12.50 
  -8   0   7   64.79   13.00 
   8   0   7   44.20   17.90 
  -8   0  -7   56.29   12.60 
   8   0  -7   63.79   17.50 
   8   0   7   93.59   15.90 
   8   0  -7   66.59   14.30 
  -8   0  -8   22.90   11.10 
  -8   0   8   22.60   12.30 
  -8   0  -8   16.80    8.20 
  -8   0   8    6.60   11.90 
   8   0   8   11.20   12.60 
   8   0  -8   16.60   11.90 
   8   0   8    8.00   10.40 
   8   0  -8   25.40   14.40 
  -8   0  -8   24.30    9.60 
   8   0  -8    4.80   10.30 
  -8   0   8    7.70    9.20 
   8   0   8   12.70   14.30 
  -8   0   9   -0.20    6.70 
  -8   0  -9    9.80    7.80 
  -8   0  -9    8.00    6.10 
  -8   0   9   25.80    9.20 
   8   0   9   23.40    9.00 
   8   0  -9   16.90   10.50 
   8   0  -9   -1.20    7.40 
  -8   0   9   13.10   10.10 
  -8   0  -9   -7.40    6.70 
   8   0  -9  -16.30    8.00 
   8   0   9    4.60    7.60 
  -9   0   0   30.60   12.40 
  -9   0   0   26.90   10.20 
   9   0   0   28.10   14.70 
   9   0   0   35.00   10.30 
  -9   0  -1   22.80   12.60 
   9   0  -1   37.10   17.40 
   9   0   1   38.20   11.30 
  -9   0   1   31.60   13.50 
   9   0  -1   35.70   10.00 
  -9   0  -1   29.60   10.00 
  -9   0  -2  219.68   25.60 
   9   0  -2  197.78   24.40 
   9   0  -2  212.68   33.40 
   9   0   2  191.58   26.80 
  -9   0   2  213.98   31.70 
  -9   0   3   89.99   21.20 
   9   0   3  157.68   23.00 
   9   0  -3  182.08   30.20 
  -9   0  -3  137.49   19.70 
   9   0   4   38.40   12.10 
  -9   0   4   79.09   19.50 
  -9   0  -4   54.39   10.80 
   9   0   4   72.89   15.30 
  -9   0  -4   59.09   11.30 
   9   0  -4   27.30   15.10 
  -9   0  -4   60.99   15.00 
   9   0   4   45.30   17.60 
  -9   0  -4   57.59   10.50 
  -9   0   4   69.29   12.80 
  -9   0   4   64.29   14.70 
  -9   0  -4   59.69   11.00 
  -9   0   4   73.49   19.60 
   9   0  -4   53.59   12.40 
   9   0  -4  104.59   24.60 
   9   0  -5   31.90   12.10 
  -9   0  -5   57.19   11.40 
  -9   0  -5   52.89   11.80 
  -9   0   5   40.20   12.20 
  -9   0  -5   74.19   16.50 
  -9   0   5   37.10   14.20 
  -9   0   5   23.30   17.70 
  -9   0  -5   33.10   10.40 
   9   0   5   23.50   11.90 
  -9   0  -5   32.50    9.70 
   9   0   5   80.89   17.70 
  -9   0  -6   37.10   11.30 
  -9   0   6   29.00   15.10 
   9   0  -6   46.20   12.90 
   9   0   6   41.60   22.10 
  -9   0   6   26.20   15.60 
  -9   0  -6   51.89   10.80 
  -9   0  -6   56.09   11.60 
   9   0   6   55.39   15.10 
   9   0  -6   38.40   17.30 
  -9   0  -6   58.39   13.30 
  -9   0  -6   61.99   17.10 
   9   0   6   42.60   18.20 
   9   0  -7   38.70   12.70 
  -9   0   7   61.29   16.60 
   9   0   7   12.90   15.90 
  -9   0   7    8.40   15.20 
   9   0  -7   37.60   15.90 
  -9   0  -7   51.49   13.10 
  -9   0  -7   32.20   10.20 
  -9   0  -7   27.40   10.50 
  -9   0  -7   63.09   16.50 
  -9   0   7   37.70   11.20 
   9   0   7   33.80   14.60 
   9   0  -8  131.09   17.60 
  -9   0  -8  120.89   16.70 
  -9   0  -8  107.89   16.90 
   9   0  -8  105.59   19.40 
   9   0   8  177.68   21.50 
   9   0  -8  138.59   19.20 
  -9   0  -8  129.89   16.00 
   9   0   8  142.59   18.80 
   9   0   8  139.59   18.70 
  -9   0   8  165.78   19.00 
  -9   0   8  105.69   16.20 
  -9   0   8  132.99   20.20 
   9   0  -9   -8.30    8.20 
  -9   0  -9    0.10    6.80 
  -9   0   9    8.10    8.30 
   9   0  -9    8.30    9.80 
  -9   0  -9    2.50    6.20 
   9   0   9    8.00    7.20 
   9   0   9   23.70    8.60 
   9   0  -9   -4.70    7.00 
  -9   0   9   -3.00    8.00 
  -9   0  -9    4.30    5.90 
  -9   0   9    9.30    6.80 
  10   0   0  470.65   48.50 
 -10   0   0  451.55   51.59 
  10   0   1  127.99   18.80 
 -10   0  -1   87.79   18.50 
  10   0  -1  120.09   16.90 
 -10   0   1  110.89   20.40 
 -10   0  -1   80.89   15.60 
  10   0  -1  117.99   24.10 
 -10   0   2   61.89   16.60 
  10   0  -2   72.69   22.60 
  10   0   2   57.79   15.50 
 -10   0  -2   81.39   14.70 
  10   0  -2   72.49   14.00 
  10   0   3   24.70   12.80 
 -10   0   3    5.80    8.00 
  10   0  -3    5.50   10.30 
 -10   0  -3   12.20    9.10 
  10   0  -3   -1.80   10.10 
 -10   0   3   14.40   14.50 
 -10   0   3    1.60   15.10 
  10   0   3   -9.30   13.40 
 -10   0   3   -2.20   11.90 
  10   0   3   30.00   10.20 
 -10   0  -3    2.90   11.80 
  10   0  -3   47.40   22.30 
 -10   0  -3   20.50    8.00 
 -10   0  -3    3.00    8.80 
 -10   0  -3  -24.00   15.30 
 -10   0  -3   11.20    8.40 
  10   0   4  136.09   21.00 
  10   0   4  119.39   25.30 
 -10   0   4  132.99   18.80 
 -10   0  -4  169.78   18.60 
 -10   0  -4  177.48   19.40 
  10   0  -4   94.89   21.10 
  10   0  -4  185.48   34.10 
 -10   0  -4  149.09   21.80 
  10   0   4  161.68   20.00 
 -10   0   4  134.89   27.20 
 -10   0   4  134.09   26.30 
  10   0  -4  137.89   19.10 
 -10   0   4  126.29   21.80 
 -10   0  -4  141.29   26.90 
 -10   0  -4  134.99   17.60 
 -10   0   4  165.88   24.60 
 -10   0  -4  155.88   18.80 
 -10   0  -5   21.20   10.50 
 -10   0  -5   -7.90    9.30 
 -10   0  -5   26.00   13.80 
 -10   0  -5    5.90    9.70 
  10   0  -5    5.80   11.30 
  10   0  -5    2.80   13.90 
 -10   0   5   12.80   11.30 
  10   0   5   20.20   21.20 
  10   0   5   25.30   13.10 
  10   0   5    0.90   16.10 
 -10   0  -5   18.40    9.10 
 -10   0   5   11.80   18.60 
 -10   0   5   -5.80   14.00 
  10   0   6   54.09   22.00 
  10   0   6   30.70   14.50 
 -10   0  -6   63.89   12.20 
  10   0   6   39.50   18.70 
  10   0  -6   53.09   17.60 
 -10   0  -6   47.50   16.10 
 -10   0   6    1.60   16.60 
 -10   0  -6   54.19   12.60 
 -10   0  -6   59.39   12.30 
  10   0  -6   43.60   13.10 
 -10   0   6   46.90   16.90 
 -10   0  -6   34.20   10.50 
 -10   0  -7   36.30   14.50 
 -10   0  -7   19.50    8.90 
 -10   0   7   12.90   10.90 
 -10   0   7   18.00    9.40 
 -10   0   7  -11.90   14.50 
  10   0  -7   27.60   11.50 
 -10   0   7   57.89   15.50 
 -10   0  -7   32.40   11.40 
 -10   0  -7   36.90   10.40 
  10   0   7   41.20   14.20 
  10   0   7   73.59   17.80 
  10   0  -7   20.50   15.60 
 -10   0   8   -2.90    6.50 
  10   0  -8   20.10   11.40 
  10   0  -8    2.60    9.00 
  10   0   8   18.70   12.40 
 -10   0   8   -1.60   11.90 
  10   0   8  -14.50   10.20 
 -10   0  -8    6.50    7.00 
 -10   0  -8   24.70    8.50 
 -10   0  -8  -14.30    8.80 
 -10   0   8    1.00    9.10 
  10   0  -8    7.60   12.00 
  10   0  -9    6.50    5.80 
 -10   0   9    8.60    7.00 
 -10   0   9    7.20    7.60 
 -10   0  -9    7.00    5.50 
  10   0  -9    6.00    7.70 
 -10   0  -9   11.80    6.30 
  10   0   9    4.60    7.60 
  11   0   0    3.30   10.20 
 -11   0   0   -6.20   12.00 
 -11   0   0    8.70   10.40 
 -11   0   0   -9.50   16.80 
 -11   0   0    3.30    8.50 
 -11   0   0    1.30    9.80 
 -11   0   0   -5.40    7.90 
 -11   0   1   17.70   10.10 
 -11   0   1  -13.40   19.20 
 -11   0   1    7.10    8.80 
 -11   0   1   -9.10   14.50 
  11   0  -1   11.10   10.80 
 -11   0   1    3.60   13.40 
  11   0   1   24.60   12.90 
 -11   0  -1    5.00   16.90 
  11   0   1   16.30   10.40 
 -11   0   1    1.80    8.80 
 -11   0   1   17.70   10.20 
 -11   0  -1   -3.70    8.60 
 -11   0  -1    2.90    8.40 
 -11   0  -1    1.20   10.30 
 -11   0  -1   12.70    9.70 
 -11   0  -1    1.00   13.20 
  11   0  -1   37.90   19.60 
  11   0   2  334.87   36.60 
  11   0  -2  330.07   36.50 
  11   0   2  344.37   40.30 
  11   0  -2  344.27   38.20 
 -11   0   2  341.17   37.90 
 -11   0  -2  389.66   36.10 
 -11   0   2  236.78   41.80 
  11   0  -2  377.26   47.60 
 -11   0  -2  413.76   39.20 
 -11   0  -2  344.77   44.30 
 -11   0  -2  348.07   36.80 
 -11   0   2  370.16   38.10 
 -11   0   2  360.76   36.70 
 -11   0   2  340.47   41.40 
  11   0  -2  245.18   38.60 
 -11   0  -2  366.96   36.40 
 -11   0  -2  341.67   36.30 
 -11   0   2  373.46   44.60 
  11   0  -3  216.28   38.50 
  11   0   3  189.08   28.90 
 -11   0   3  250.17   27.30 
  11   0  -3  189.68   26.50 
 -11   0  -3  200.38   24.20 
  11   0   3  213.88   24.40 
 -11   0   3  213.68   24.50 
 -11   0  -3  210.38   23.90 
 -11   0  -3  278.67   29.30 
 -11   0  -3  180.78   30.30 
 -11   0  -3  215.28   23.30 
  11   0  -3  197.88   23.80 
 -11   0   3  137.39   28.40 
  11   0   3  217.18   25.90 
 -11   0  -3  194.68   23.80 
 -11   0   3  194.88   28.30 
 -11   0   4   32.60   19.00 
 -11   0  -4   19.30    9.70 
 -11   0  -4   42.80   10.90 
  11   0  -4   20.20   15.30 
 -11   0  -4    7.60   22.20 
 -11   0  -4   33.10   11.30 
  11   0   4   45.80   15.70 
 -11   0   4   31.60   12.20 
  11   0   4   21.20   12.00 
 -11   0   4  -12.30   14.00 
 -11   0   4   63.69   20.80 
  11   0   4   15.00   20.70 
 -11   0  -4   36.30    9.90 
 -11   0  -4   17.70   14.10 
  11   0  -4    5.10   11.30 
 -11   0  -5   96.69   19.10 
  11   0   5   69.39   25.00 
 -11   0   5  100.89   19.30 
 -11   0   5   46.60   17.30 
 -11   0  -5   63.69   14.00 
  11   0  -5   74.99   15.10 
  11   0   5   73.59   16.30 
 -11   0  -5   96.09   15.00 
 -11   0  -5   67.99   14.10 
 -11   0   5   93.09   16.40 
  11   0   5   83.69   19.90 
  11   0  -5   72.39   17.10 
 -11   0   5   99.49   24.10 
 -11   0  -5   68.09   13.30 
 -11   0  -6  483.85   50.89 
 -11   0  -6  456.25   49.99 
 -11   0  -6  466.25   49.80 
  11   0   6  562.64   53.89 
  11   0  -6  484.85   53.49 
  11   0   6  455.05   51.99 
 -11   0   6  483.75   53.29 
 -11   0  -6  598.24   53.69 
 -11   0   6  524.05   51.89 
  11   0  -6  501.45   51.19 
 -11   0  -6  421.56   49.99 
  11   0   6  506.45   55.79 
 -11   0  -7   74.79   12.60 
 -11   0  -7   44.10   12.60 
 -11   0  -7   49.50   17.00 
 -11   0   7   63.99   16.60 
 -11   0  -7   58.09   11.00 
  11   0  -7   75.89   12.80 
 -11   0   7   65.29   16.10 
  11   0   7   73.19   14.70 
  11   0   7   32.50   18.70 
  11   0   7   70.19   17.30 
 -11   0   7   41.00   10.20 
 -11   0   7   66.79   12.70 
  11   0  -7   53.69   15.90 
 -11   0  -8    3.70    7.80 
  11   0  -8    1.10   11.20 
  11   0   8    7.10   11.40 
  11   0  -8   -2.50    7.70 
  11   0  -8    3.90   10.00 
  11   0   8    7.20    9.90 
 -11   0   8    9.30   10.50 
 -11   0   8   22.20    8.20 
 -11   0  -8   11.00    7.80 
 -11   0  -8    8.90    6.50 
 -12   0   0  222.78   29.50 
 -12   0   0  246.58   33.00 
 -12   0   0  219.08   35.90 
 -12   0   0  272.77   28.40 
  12   0   0  232.48   28.30 
 -12   0   0  241.28   29.40 
 -12   0   0  302.17   28.10 
  12   0   0  272.77   31.30 
  12   0   0  241.08   32.30 
 -12   0   0  249.08   29.00 
 -12   0   0  253.47   38.20 
  12   0   1   59.99   14.60 
 -12   0   1   34.30   10.10 
 -12   0   1   15.60   16.70 
 -12   0  -1   26.10   10.70 
 -12   0   1   15.90   20.90 
 -12   0   1   26.00   12.10 
  12   0   1    8.80   10.50 
 -12   0   1   33.70   10.80 
 -12   0   1   19.60   15.30 
 -12   0  -1   23.00   17.80 
 -12   0   1   23.40   10.10 
  12   0  -1   36.10   13.00 
 -12   0  -1   20.00    9.30 
  12   0   1    3.00   17.20 
 -12   0  -1   16.30   10.60 
  12   0  -1   14.30   10.50 
  12   0   2   44.10   12.30 
  12   0  -2   58.89   14.00 
 -12   0   2   56.19   14.30 
 -12   0  -2   48.30   12.30 
 -12   0  -2   42.10   19.30 
 -12   0   2   20.90   16.10 
  12   0  -2   28.90   15.60 
  12   0  -2   44.90   12.30 
 -12   0  -2   54.99   11.00 
 -12   0   2   50.09   13.70 
  12   0  -2   30.40   22.70 
  12   0   2   42.50   15.80 
 -12   0  -2   47.50   12.20 
 -12   0  -2   53.09   14.60 
 -12   0   2   42.60   19.00 
  12   0   2   71.59   19.80 
 -12   0   2   40.20   11.60 
 -12   0  -3   42.00   22.50 
 -12   0   3   -8.80   10.80 
 -12   0   3  -13.00   14.60 
  12   0   3   -5.30   11.50 
 -12   0  -3    4.40   14.20 
 -12   0  -3    1.00    9.30 
 -12   0  -3    9.90   10.90 
 -12   0  -3    2.20    9.00 
 -12   0  -3    2.80   10.70 
 -12   0   3   11.70   14.10 
  12   0   3   38.80   20.60 
  12   0   3   31.40   13.50 
 -12   0   3   25.00   19.10 
  12   0  -3  -13.20   10.40 
 -12   0   4   25.00   12.50 
  12   0   4    4.60   13.70 
 -12   0  -4   36.70   10.40 
 -12   0  -4    4.60   10.10 
  12   0   4   18.60   13.40 
 -12   0   4   -8.50   15.20 
 -12   0  -4    4.70   24.50 
 -12   0   4   63.39   21.80 
  12   0   4   50.49   21.90 
 -12   0  -4   18.30   14.70 
 -12   0   4   50.09   22.00 
 -12   0  -4   18.90   11.60 
  12   0  -4   36.30   15.20 
  12   0  -4   15.60   11.60 
 -12   0  -4   18.20   11.00 
 -12   0  -5   10.30   10.40 
 -12   0   5    2.80   12.00 
 -12   0  -5   -6.70   11.90 
 -12   0   5   -4.10   15.40 
 -12   0  -5   36.10   15.70 
  12   0   5   12.60   13.70 
  12   0  -5   -5.30   14.10 
 -12   0  -5    9.30   11.30 
  12   0  -5    4.80   11.70 
  12   0   5   17.00   15.20 
 -12   0   5   32.20   20.90 
 -12   0   5   -3.90   14.90 
  12   0   5   30.80   22.20 
 -12   0  -5   -3.20    9.70 
  12   0  -6   21.10   11.30 
  12   0   6   18.00   13.80 
 -12   0   6   18.20    9.10 
 -12   0   6   14.50   15.20 
 -12   0  -6   34.80   14.50 
 -12   0  -6   19.40   11.40 
  12   0   6   40.10   16.30 
 -12   0  -6   44.70   10.20 
 -12   0  -6   14.90   10.00 
  12   0   6   22.80   20.70 
  12   0  -6   29.10   15.50 
 -12   0   6   26.50   15.70 
 -12   0  -6   55.59   12.70 
 -12   0  -7   22.90    8.40 
  12   0  -7   29.10   13.80 
  12   0   7   28.00   13.60 
  12   0  -7   31.50   12.60 
 -12   0   7   24.00   13.00 
 -12   0  -7   18.60    8.90 
  12   0  -7   19.50    9.60 
  12   0   7   28.00   12.30 
  12   0   7   13.40   16.10 
 -12   0  -7   30.90   10.60 
 -12   0   7   21.80   13.80 
  12   0  -8   -5.80    8.80 
  12   0  -8   -2.00    8.30 
 -12   0   8   -4.70    8.70 
 -12   0  -8    7.60    7.00 
  12   0  -8   -5.10    6.50 
 -12   0  -8   -1.30    5.50 
  12   0   8    9.00    9.50 
  12   0   8   -2.70    7.40 
  13   0   0   -3.10   10.40 
 -13   0   0  -14.80   12.40 
 -13   0   0   -1.70   10.30 
  13   0   0    2.40   18.10 
 -13   0   0   56.39   23.90 
 -13   0   0    0.50   12.10 
 -13   0   0   -7.70   11.10 
 -13   0   0   22.00   18.10 
 -13   0   0   -1.00    9.20 
 -13   0  -1  188.28   29.50 
 -13   0   1  105.69   23.50 
 -13   0   1  114.39   18.20 
 -13   0  -1  146.59   19.50 
 -13   0   1  120.79   18.80 
  13   0  -1  152.48   18.40 
 -13   0  -1  130.09   18.20 
  13   0   1  122.69   18.10 
 -13   0   1  117.69   20.00 
 -13   0  -1  120.69   17.90 
 -13   0   1  146.59   28.50 
 -13   0   1  100.49   25.20 
 -13   0  -1  161.18   21.20 
  13   0   1  126.89   23.40 
  13   0   2   80.69   15.20 
 -13   0  -2   65.79   14.90 
 -13   0  -2   90.69   14.00 
  13   0  -2   83.59   14.70 
 -13   0  -2  132.69   27.80 
  13   0  -2   64.49   17.80 
 -13   0  -2   60.69   14.50 
  13   0   2   92.99   21.30 
 -13   0   2   68.89   17.10 
 -13   0   2   68.49   14.60 
 -13   0   2  101.99   22.10 
 -13   0  -2   74.19   16.40 
 -13   0   2   59.79   15.80 
 -13   0  -3   11.40   11.70 
 -13   0  -3   41.60   15.70 
 -13   0   3    0.90   17.10 
 -13   0   3    4.40   11.80 
  13   0   3   14.70   13.20 
 -13   0   3   12.80   15.90 
 -13   0  -3   34.00   12.90 
 -13   0  -3   81.09   25.90 
 -13   0   3   39.40   13.30 
  13   0   3   93.69   21.70 
 -13   0  -3   17.70   10.20 
  13   0  -3   22.90   11.90 
  13   0   3   31.40   13.70 
 -13   0   3   62.59   21.80 
 -13   0  -4   45.00   11.70 
  13   0   4   44.50   14.50 
 -13   0   4   65.49   22.50 
 -13   0  -4   41.70   12.30 
 -13   0   4   62.89   15.80 
  13   0   4   48.30   15.00 
 -13   0  -4   65.79   28.00 
  13   0  -4   29.20   16.60 
 -13   0  -4   68.99   14.50 
  13   0  -4   43.10   13.30 
 -13   0  -4   80.59   17.70 
 -13   0   4   62.89   14.20 
 -13   0  -4   32.20   13.00 
  13   0   4  122.89   25.50 
 -13   0   4   52.79   18.70 
 -13   0  -5   41.80   13.40 
  13   0  -5   19.80   12.40 
 -13   0  -5   23.50   12.30 
 -13   0  -5   49.30   11.50 
 -13   0   5   14.90   13.60 
 -13   0  -5   56.89   15.60 
 -13   0   5   30.90   15.80 
 -13   0   5   44.30   17.50 
 -13   0  -5   31.50   10.60 
  13   0   5   58.39   22.20 
  13   0  -5   21.10   14.20 
  13   0   5   52.59   15.70 
  13   0   5   37.00   14.40 
 -13   0  -6    1.30   10.40 
 -13   0   6  -17.70   12.90 
  13   0   6   23.60   12.80 
 -13   0  -6   15.30   10.60 
  13   0  -6   34.70   15.10 
 -13   0  -6   25.20    9.30 
 -13   0  -6   19.60    8.80 
 -13   0  -6   19.70   17.70 
 -13   0   6  -13.90   13.50 
  13   0   6   61.79   20.00 
  13   0  -6   14.80    9.60 
  13   0   6    7.40   13.30 
  13   0  -7   -3.50   10.00 
  13   0  -7    9.50    7.70 
 -13   0   7    3.10   11.40 
 -13   0   7  -12.80   11.40 
  13   0   7    3.70   13.80 
  13   0  -7   -0.90   10.90 
  13   0   7   -2.70    9.80 
 -13   0  -7   -0.70    6.60 
  13   0   7   -9.70    9.60 
 -13   0  -7    7.00    8.60 
 -13   0   8    5.70    8.60 
 -13   0  -8   -0.90    4.80 
  13   0  -8   10.20    9.50 
  13   0   8    2.40    7.20 
 -13   0  -8  -14.50    5.90 
  13   0  -8    9.00    6.70 
  14   0   0   -3.40   11.20 
 -14   0   0   -3.70    9.60 
 -14   0   0   -1.90   12.70 
 -14   0   0   -2.30   11.60 
 -14   0   0   19.80   19.10 
 -14   0   0   97.19   26.80 
 -14   0   0   22.40   11.80 
 -14   0   1  130.69   25.60 
 -14   0  -1  186.98   32.60 
  14   0   1  125.79   17.90 
 -14   0  -1  112.29   20.00 
 -14   0   1  100.99   19.00 
 -14   0  -1  104.89   18.50 
 -14   0  -1  131.79   19.70 
 -14   0   1  129.89   19.40 
  14   0   1  102.79   22.70 
  14   0  -1   89.99   17.00 
 -14   0   1  112.59   18.40 
 -14   0  -1  123.79   17.30 
  14   0  -1  121.89   21.70 
 -14   0  -2  226.48   27.40 
 -14   0   2  192.98   28.90 
 -14   0   2  247.48   32.70 
 -14   0  -2  250.07   30.00 
  14   0  -2  243.68   31.00 
 -14   0   2  274.27   31.50 
 -14   0  -2  271.97   31.30 
  14   0   2  266.17   29.80 
  14   0  -2  229.08   28.40 
 -14   0   2  239.78   29.30 
  14   0   2  257.27   34.10 
 -14   0   2  226.68   33.90 
 -14   0  -2  247.48   29.70 
 -14   0   3   79.39   23.40 
 -14   0  -3   24.30   14.20 
 -14   0   3   10.60   17.70 
 -14   0   3   36.20   13.50 
 -14   0  -3  122.89   29.70 
  14   0   3   72.59   14.60 
 -14   0  -3   40.60   13.40 
 -14   0  -3   24.50   11.50 
  14   0  -3   50.29   12.70 
 -14   0   3   38.80   16.80 
 -14   0  -3   36.00   16.30 
  14   0   3   64.39   23.00 
 -14   0   4   68.59   23.00 
 -14   0  -4   67.19   17.00 
 -14   0   4   39.40   18.50 
  14   0  -4   66.79   17.30 
  14   0  -4   52.09   13.20 
 -14   0   4   61.09   15.00 
 -14   0  -4   51.69   14.20 
 -14   0  -4   43.70   12.40 
  14   0   4   99.79   23.50 
 -14   0  -4   69.89   14.80 
  14   0   4   41.20   14.00 
  14   0   4   64.69   15.40 
 -14   0   4   71.79   15.10 
  14   0   5   71.99   22.40 
  14   0  -5   50.19   15.80 
 -14   0  -5   28.90   10.10 
 -14   0   5   18.70   14.70 
 -14   0  -5   69.79   13.30 
 -14   0   5   51.69   15.00 
  14   0   5   47.30   14.20 
  14   0  -5   40.20   12.20 
 -14   0  -5   61.69   16.10 
  14   0  -5   33.00   14.10 
 -14   0   5   68.29   14.00 
  14   0   5   52.89   21.80 
 -14   0  -5   32.80   12.30 
  14   0   5   45.50   13.90 
  14   0   6   40.30   17.00 
  14   0   6   22.10   11.80 
  14   0   6   40.80   11.70 
 -14   0   6    3.40   12.60 
 -14   0  -6   12.70    7.90 
  14   0  -6   42.10   12.80 
 -14   0   6   35.20   13.80 
  14   0  -6   19.00    8.80 
 -14   0  -6   37.60   10.10 
 -14   0  -6   35.90   10.50 
  14   0  -7   16.30    6.60 
  14   0   7   19.40   11.90 
  14   0  -7   19.40   10.00 
 -14   0  -7   11.90    6.60 
 -14   0   7   33.00   10.60 
 -14   0   7   20.90   10.40 
  14   0   7   25.10    9.10 
 -14   0  -7   17.70    8.20 
  14   0   7   23.70    9.00 
  14   0  -7   15.70    9.70 
 -14   0  -7   30.10    8.20 
 -15   0   0   19.20   20.00 
  15   0   0   -9.10   11.50 
  15   0   0   25.00   18.00 
 -15   0   0    2.60   14.00 
 -15   0   0   -5.70    9.10 
 -15   0   0   -8.00   11.80 
 -15   0   0  -13.70   13.60 
  15   0   1    5.20   16.90 
 -15   0   1    4.70   16.10 
  15   0   1   -1.40   11.80 
 -15   0   1   22.00   14.70 
 -15   0   1    4.30   14.70 
 -15   0   1    0.00   20.40 
  15   0  -1   15.40   11.70 
 -15   0  -1    6.50   14.20 
 -15   0  -1   34.10   14.30 
 -15   0   1    7.00   12.50 
  15   0  -1   23.80   17.30 
 -15   0  -1  -12.80   13.70 
 -15   0  -1   16.30   10.40 
 -15   0   2   32.90   16.10 
 -15   0   2   74.09   23.30 
 -15   0   2   13.50   14.60 
  15   0  -2   39.80   12.30 
  15   0  -2   19.80   15.60 
 -15   0   2   48.80   17.60 
 -15   0  -2   52.29   15.00 
 -15   0  -2   35.90   15.80 
  15   0   2   42.30   19.70 
 -15   0   2   53.19   13.90 
  15   0   2   29.30   13.30 
 -15   0  -2   32.00   14.10 
 -15   0  -2   40.50   11.30 
 -15   0   3   50.89   22.50 
 -15   0  -3   13.00   10.00 
  15   0   3   34.40   13.40 
 -15   0  -3    4.70   13.90 
 -15   0  -3   35.30   13.50 
 -15   0   3   32.50   16.00 
  15   0  -3    7.30   10.80 
  15   0   3   40.80   21.60 
 -15   0  -3   40.80   15.20 
 -15   0  -3   11.70   12.90 
  15   0  -3   43.10   17.40 
 -15   0   3   15.50   12.70 
 -15   0   3  -16.30   15.30 
 -15   0  -4   15.60   14.20 
 -15   0   4   55.39   20.30 
  15   0   4   46.80   14.00 
 -15   0  -4   42.50   12.90 
  15   0  -4   67.09   16.20 
  15   0   4   48.60   20.60 
 -15   0   4   53.09   13.20 
  15   0   4   26.90   11.50 
  15   0  -4   46.20   11.70 
 -15   0   4   49.40   17.50 
  15   0   4   39.70   19.20 
 -15   0  -4   56.59   16.00 
 -15   0  -4   29.60   12.60 
 -15   0   4   36.50   13.80 
 -15   0  -4   37.90   10.50 
 -15   0  -5  -12.50   11.70 
 -15   0  -5    7.40    8.40 
  15   0   5   -6.40   18.80 
 -15   0   5   17.30   11.50 
 -15   0  -5    7.30   10.20 
  15   0  -5   16.40   11.50 
 -15   0  -5   -3.80   10.10 
  15   0   5    9.50   10.50 
  15   0  -5    5.10   12.50 
 -15   0   5   10.80   12.50 
 -15   0   5   15.40   10.90 
  15   0   5    7.00   16.70 
  15   0   5    1.10   11.00 
  15   0  -5    2.50    9.30 
  15   0   6   55.89   15.90 
 -15   0  -6   52.29   10.00 
 -15   0  -6   73.19   10.90 
  15   0   6   66.19   12.00 
 -15   0   6   55.99   11.70 
 -15   0   6   66.19   14.10 
  15   0   6   76.79   12.60 
  15   0  -6   62.79   10.20 
 -15   0  -6   60.39   11.90 
 -15   0  -6   90.49   12.00 
  15   0  -6   66.59   13.60 
 -15   0  -7   54.69    9.50 
  15   0   7   46.50   12.30 
  16   0   0  193.68   23.60 
  16   0   0  203.68   28.20 
 -16   0   0  195.18   29.80 
 -16   0   0  165.98   23.70 
 -16   0   0  224.38   26.30 
 -16   0   0  183.08   26.40 
 -16   0   1   26.10   14.60 
  16   0   1   33.00   12.40 
 -16   0   1   15.60   14.00 
 -16   0   1   28.50   14.90 
 -16   0  -1   12.20    9.50 
  16   0  -1   40.20   12.10 
  16   0  -1   41.40   16.80 
  16   0   1   49.30   17.00 
 -16   0  -1    2.80   14.40 
 -16   0   1   19.20   20.50 
 -16   0   1   16.20   13.10 
 -16   0  -1   37.20   15.20 
  16   0   1   44.50   19.10 
 -16   0   2   98.99   20.30 
 -16   0  -2  116.79   15.60 
 -16   0   2  103.89   18.30 
  16   0  -2   97.19   19.10 
 -16   0  -2  129.29   18.70 
  16   0   2  121.69   22.50 
  16   0   2   85.29   20.80 
 -16   0  -2   86.99   18.00 
 -16   0  -2  103.99   17.80 
  16   0  -2  117.39   16.10 
 -16   0   2  117.89   24.90 
 -16   0   2   95.09   18.60 
  16   0   2  121.19   17.20 
 -16   0  -3    2.00    8.70 
 -16   0  -3    0.50   11.90 
 -16   0  -3   -9.00   12.60 
 -16   0   3   15.00   18.70 
 -16   0   3   -0.30   11.80 
 -16   0   3   -0.90   13.90 
 -16   0  -3    3.30   11.40 
  16   0  -3   -3.50    9.60 
  16   0   3   47.00   18.70 
  16   0   3   -1.90   18.00 
  16   0  -3   12.70   14.70 
  16   0   3    1.70   11.40 
 -16   0   3   -3.80   14.60 
 -16   0  -4    5.50   10.70 
  16   0   4    4.30   11.20 
  16   0   4   13.60   15.00 
 -16   0  -4    9.60    8.30 
  16   0   4    1.70   15.40 
 -16   0  -4  -14.10   11.70 
  16   0  -4    2.10    9.10 
 -16   0   4   -6.30   12.20 
  16   0  -4   13.10   12.80 
 -16   0  -4    2.90   10.40 
 -16   0   4   22.60   11.60 
  16   0  -5   -9.90    7.50 
  16   0   5    9.50    7.40 
  16   0  -5    4.70   10.10 
  16   0   5   10.70    9.70 
 -16   0  -5   10.30    7.10 
  16   0   5  -12.60   12.90 
  16   0  -5   12.90   10.60 
 -16   0  -5   19.50    8.40 
 -16   0  -5   -1.50    9.90 
 -16   0   5    6.10    8.50 
 -16   0  -5   -1.10    9.10 
 -16   0   5   -5.10   11.40 
  16   0   6    4.20    8.70 
  16   0   6   -5.70   10.40 
  16   0   6   15.50    7.90 
 -16   0  -6    5.50    7.00 
  16   0  -6    2.50    8.20 
 -16   0  -6    4.10    5.40 
 -16   0  -6    4.80    6.70 
 -16   0   6    6.80    9.30 
  16   0  -6    6.90    7.90 
  16   0  -6   -2.00    8.70 
  17   0   0    4.60   10.60 
 -17   0   0  -12.60   12.20 
  17   0   0   17.00   15.50 
 -17   0   0   10.20   12.90 
 -17   0   1    8.00   13.10 
  17   0   1   11.50   10.50 
  17   0   1   21.00   14.00 
 -17   0   1   15.90   12.90 
 -17   0   1   11.30   11.30 
 -17   0  -1   19.80   13.50 
 -17   0   1   -1.30   18.10 
 -17   0  -1   24.50   13.60 
 -17   0   1   31.30   13.60 
  17   0  -1   -1.50   10.60 
  17   0  -1   12.20   14.30 
  17   0   1    0.90   15.90 
  17   0  -2   22.40    9.80 
  17   0  -2   55.49   15.60 
 -17   0   2   28.70   14.10 
 -17   0   2   35.70   19.50 
 -17   0  -2    9.80   12.30 
 -17   0  -2   13.90   13.20 
 -17   0   2   41.40   13.60 
  17   0   2   37.30   15.40 
  17   0   2   20.70   11.30 
  17   0   2   62.89   18.00 
 -17   0  -2   15.60    8.30 
  17   0  -2   28.80   12.60 
 -17   0   2   28.90   12.70 
  17   0   3  106.89   16.30 
 -17   0  -3  141.39   17.90 
 -17   0  -3  126.39   17.90 
  17   0  -3  120.79   19.60 
  17   0   3  148.79   21.80 
 -17   0  -3  111.29   16.80 
  17   0  -3  103.79   15.10 
 -17   0   3  115.39   22.40 
  17   0   3   94.79   19.50 
 -17   0  -3   91.69   14.30 
 -17   0   3  114.19   19.80 
 -17   0   3  115.29   16.80 
 -17   0  -4   61.39    9.40 
 -17   0   4   53.99   12.00 
  17   0   4   49.10   15.10 
  17   0  -4   51.29   13.90 
 -17   0   4   50.29   13.60 
  17   0  -4   37.70    9.80 
 -17   0  -4   56.69   11.60 
 -17   0  -4   75.39   13.10 
  17   0  -4   42.60   12.50 
  17   0   4   74.69   11.90 
  17   0   4   54.89   15.10 
 -17   0  -4   61.99   11.80 
 -17   0  -5    1.00    7.80 
 -17   0  -5    3.70    5.40 
  17   0  -5    1.50    9.30 
 -17   0  -5    3.50    7.70 
 -17   0   5   -3.70    9.60 
  17   0  -5   12.20    5.90 
  17   0   5    7.40   11.70 
  17   0  -5   12.40   12.50 
 -17   0  -5    9.90    8.10 
  17   0   5   -5.00    7.30 
  18   0   0   30.50   10.10 
 -18   0   0   20.60   12.00 
  18   0   0   19.70   14.40 
 -18   0   0  -16.40   11.50 
  18   0  -1    2.90   14.20 
  18   0  -1   -2.00    8.20 
 -18   0   1   13.40   16.40 
  18   0   1   19.50    9.30 
  18   0  -1   -9.60   11.80 
 -18   0   1   -3.70   11.40 
 -18   0  -1    8.80   11.20 
  18   0   1   21.70   14.60 
 -18   0  -1    7.10   11.40 
 -18   0   1    5.20   10.20 
  18   0  -2  108.59   13.80 
  18   0   2  107.69   17.30 
 -18   0   2  110.49   17.10 
  18   0   2  118.79   19.10 
  18   0   2   90.89   14.30 
 -18   0   2   91.99   14.70 
 -18   0  -2   93.49   15.80 
 -18   0  -2   92.89   15.60 
 -18   0   2  113.59   19.80 
  18   0  -2   75.69   16.60 
 -18   0   2   97.19   16.30 
  18   0  -2  108.89   17.50 
 -18   0  -3   53.59   11.80 
  18   0   3   40.00   12.70 
  18   0   3   46.50   10.30 
 -18   0   3   45.90   10.90 
 -18   0   3   54.29   12.60 
 -18   0  -3   47.30   11.30 
  18   0   3   46.10   14.70 
  18   0  -3   37.80    8.80 
  18   0  -3   33.50   12.30 
  18   0   4   -9.20    7.50 
  18   0   4    1.00   10.10 
  18   0  -4   -5.40    8.00 
  18   0   4   -3.40   10.10 
  18   0  -4   -4.50    9.10 
 -18   0  -4    8.50    7.90 
 -18   0   4  -15.50    8.60 
 -18   0  -4   -2.40    7.50 
  18   0  -4   -5.80   10.40 
 -19   0   0    0.40    9.20 
  19   0   0   -1.30   11.30 
  19   0   0   -2.40    7.00 
  19   0   0   10.40   10.80 
  19   0  -1   22.30    9.40 
  19   0  -1   19.10    7.30 
  19   0   1    4.10   11.80 
  19   0   1   11.10   11.10 
 -19   0  -1    5.80    9.50 
 -19   0  -1   12.80    9.20 
  19   0   1   15.00    8.20 
  19   0  -1   19.00   11.00 
 -19   0   1   24.10   10.00 
  19   0   2   -4.70   11.40 
 -19   0   2   -5.40    9.10 
 -19   0   2   18.00   10.00 
 -19   0  -2   10.40    8.60 
  19   0  -2    0.80    6.40 
  19   0  -2    0.50    9.80 
 -19   0  -2    6.20    8.70 
  19   0   2  -34.10   11.90 
  19   0   2   -2.80    7.20 
  19   0   3  -13.00    7.30 
  19   0  -3  -10.00    9.00 
 -19   0  -3   -6.30    6.80 
  19   0   3   21.20   12.30 
 -19   0  -3   14.30   10.70 
   0  -1   0    1.20    0.70 
   0  -1   0    0.70    0.60 
   0   1  -1    2.80    2.90 
   0  -1  -1    3.20    2.60 
   0  -1   1    2.40    3.10 
   0  -1  -1   -0.30    3.30 
   0  -1   1    4.20    2.50 
   0   1   1    4.20    2.50 
   0   1   1    0.30    2.70 
   0  -1  -2   20.40    7.20 
   0   1   2   23.30    6.50 
   0  -1   2   23.20    7.40 
   0  -1  -2   11.30    5.30 
   0   1  -2   16.60    5.60 
   0   1  -3  761.22   79.69 
   0  -1  -3  765.42   79.49 
   0  -1   3  844.82   79.09 
   0  -1  -3  804.02   78.69 
   0   1   3  800.72   78.79 
   0   1  -3  853.21   78.79 
   0  -1  -4   67.89   13.90 
   0   1  -4   75.39   14.80 
   0   1  -4   62.79   10.80 
   0  -1  -4   55.69   10.80 
   0  -1  -5  109.69   19.60 
   0  -1  -5  112.39   16.20 
   0   1  -5  133.59   21.70 
   0   1  -5   86.49   15.20 
   0   1  -6   70.49   14.50 
   0   1  -6   96.99   12.30 
   0   1   6  142.69   15.60 
   0   1  -6   85.09   14.70 
   0  -1   6   79.79   13.60 
   0  -1  -6  101.69   12.70 
   0  -1  -6   82.49   15.20 
   0  -1   6   38.90   20.70 
   0   1   6   92.59   13.80 
   0  -1   6  103.59   14.50 
   0  -1  -6  119.19   15.70 
   0   1   7   33.00   11.60 
   0  -1   7   38.50   11.70 
   0  -1   7   21.20   11.30 
   0   1  -7   56.89   14.20 
   0  -1  -7   40.50   12.80 
   0  -1  -7   34.30   12.60 
   0   1  -7   31.30   12.20 
   0   1   7   42.30   12.50 
   0   1  -7   31.00    9.90 
   0  -1  -7   33.30   10.00 
   0  -1  -8  323.37   35.70 
   0   1  -8  289.17   35.40 
   0  -1  -8  337.47   33.60 
   0  -1   8  324.07   35.60 
   0  -1   8  345.87   35.60 
   0   1  -8  279.07   35.90 
   0   1  -8  308.17   33.60 
   0  -1  -8  287.67   35.80 
   0   1   8  340.47   36.60 
   0   1   8  284.07   34.90 
   0   1   9  312.27   36.60 
   0   1  -9  334.47   37.00 
   0   1  -9  326.07   35.20 
   0   1  -9  321.07   37.20 
   0  -1  -9  351.16   35.20 
   0  -1   9  324.27   37.10 
   0  -1  -9  340.27   36.70 
   0  -1  -9  315.97   36.60 
   0   1   9  344.87   37.00 
   0  -1   9  353.86   36.30 
   0   1   9  388.96   37.60 
   0  -1  10    0.50    7.90 
   0   1 -10   -9.80    6.40 
   0   1  10   10.50    8.20 
   0  -1 -10    1.10    6.70 
   0  -1  10    8.50    8.20 
   0  -1 -10    0.70    7.10 
   0   1  10  -10.30    8.00 
   0  -1 -10   -2.30    7.00 
   0   1 -10   -8.80    6.80 
   0   1 -10    5.40    7.80 
   1  -1   0 6888.41  665.23 
  -1   1   0 6635.04  664.43 
  -1  -1   0 6825.62  664.33 
   1  -1   0 7230.68  664.63 
  -1   1   0 7088.29  664.63 
   1  -1   0 6929.51  664.53 
  -1  -1   0 7086.29  664.83 
  -1  -1   0 6819.62  664.53 
   1  -1   1 2042.70  191.58 
  -1  -1  -1 1842.42  191.68 
   1   1  -1 2123.79  191.88 
   1  -1   1 1912.91  191.88 
  -1  -1  -1 2071.99  191.68 
  -1  -1   1 1870.51  192.18 
  -1  -1   1 1983.20  191.88 
   1  -1  -1 2023.90  191.88 
  -1   1  -1 2172.08  191.78 
   1  -1  -1 1960.80  192.38 
   1   1   1 2020.20  191.68 
   1   1   1 1962.30  191.88 
   1   1  -2 1030.70  102.99 
   1  -1   2 1052.09  102.19 
   1   1  -2 1100.79  102.19 
  -1  -1  -2  984.40  101.99 
  -1  -1  -2 1089.59  101.89 
   1  -1  -2 1044.00  102.09 
  -1   1  -2 1156.58  101.99 
   1   1   2 1050.79  102.09 
   1  -1  -2 1054.79  102.99 
   1   1   2  987.40  101.79 
   1   1  -3  315.97   35.10 
  -1  -1  -3  306.67   33.30 
  -1  -1  -3  330.07   32.90 
   1  -1   3  328.57   33.80 
   1   1  -3  314.67   33.30 
   1   1   3  320.37   33.40 
   1  -1  -3  316.47   33.10 
   1  -1  -3  313.37   34.70 
  -1   1  -3  332.77   33.00 
  -1  -1  -4  723.43   76.39 
   1   1  -4  844.42   77.79 
   1  -1   4  802.42   78.09 
  -1  -1  -4  737.43   78.09 
   1   1  -4  800.72   79.69 
  -1  -1  -4  793.82   77.39 
  -1   1  -4  825.52   77.49 
   1  -1  -4  802.82   77.69 
  -1   1  -4  746.83   78.39 
   1  -1  -4  802.22   79.39 
  -1   1  -4  713.83   76.39 
   1   1   4  822.42   77.99 
   1   1  -5  397.36   42.20 
   1   1  -5  405.06   45.80 
  -1  -1  -5  391.46   41.80 
  -1   1  -5  395.66   43.90 
   1  -1  -5  393.96   45.30 
  -1   1  -5  396.66   41.90 
   1  -1  -5  399.56   42.20 
  -1  -1  -6  132.39   16.80 
   1   1  -6  129.39   19.10 
   1  -1   6  159.38   18.90 
   1  -1   6  135.49   18.00 
   1   1  -6  153.78   17.30 
  -1   1   6  130.89   18.30 
  -1  -1  -6  141.79   18.40 
   1   1  -6  159.68   27.10 
  -1  -1  -6  159.28   19.70 
  -1   1   6  131.09   17.90 
  -1   1  -6  150.38   19.60 
  -1  -1   6  156.08   18.70 
   1  -1  -6  176.48   18.90 
  -1  -1   6  130.39   17.70 
   1   1   6  124.29   18.10 
   1   1   6  170.88   19.40 
  -1   1  -6  149.19   16.50 
  -1  -1   6  101.39   25.00 
  -1   1  -6  126.59   18.00 
   1  -1  -6  126.69   16.70 
  -1   1   7  128.69   17.50 
  -1  -1  -7  119.39   17.10 
  -1   1   7  130.99   18.20 
   1   1  -7  117.69   18.70 
  -1  -1  -7  146.79   18.20 
   1  -1   7   82.79   16.10 
   1   1  -7  115.79   18.00 
   1   1  -7  111.99   15.80 
   1  -1   7  114.79   17.90 
  -1  -1  -7   90.29   15.00 
  -1  -1  -7  108.59   16.40 
  -1  -1   7  100.69   16.80 
   1  -1  -7  122.79   17.60 
   1   1   7  119.59   17.40 
   1   1   7  104.49   17.20 
  -1   1  -7  113.19   14.80 
   1  -1  -7  132.69   15.90 
  -1  -1   7   98.89   16.70 
  -1   1  -7  129.39   18.90 
  -1   1  -7  111.59   16.50 
   1  -1  -7  113.69   18.20 
   1  -1  -7   98.29   16.50 
   1   1  -8   71.99   16.10 
  -1  -1  -8   77.39   15.00 
   1  -1   8   44.50   13.90 
  -1  -1  -8   54.79   13.70 
   1   1  -8   55.09   14.60 
  -1  -1  -8   59.29   12.10 
   1   1  -8   59.59   12.40 
  -1   1   8   74.99   14.80 
  -1   1   8   88.29   16.60 
   1  -1   8  104.79   16.20 
  -1  -1  -8   58.59   14.00 
   1   1   8   72.09   15.00 
  -1   1  -8   46.20   14.50 
  -1   1  -8   69.79   14.50 
   1  -1  -8   52.99   12.40 
   1  -1  -8   53.99   15.60 
   1  -1  -8   72.09   15.80 
   1   1   8   95.09   16.40 
  -1   1  -8   62.39   12.40 
  -1  -1   8   42.40   13.80 
  -1  -1   8   84.69   14.70 
   1   1  -9   70.59   14.70 
   1   1  -9   88.89   14.50 
  -1  -1  -9   58.29   12.70 
  -1  -1  -9   56.19   12.10 
   1  -1   9  115.49   15.60 
   1   1  -9   77.39   12.00 
  -1   1   9   27.60   12.40 
   1  -1   9   51.99   12.90 
  -1  -1  -9   82.39   12.00 
  -1   1   9   72.09   14.70 
   1   1   9   74.19   14.30 
  -1  -1   9   60.19   13.80 
  -1  -1   9   37.70   13.70 
   1  -1  -9   84.69   13.80 
  -1  -1   9   75.49   14.10 
  -1   1  -9   89.99   13.70 
  -1   1  -9   54.69   13.30 
   1  -1  -9   86.19   14.30 
   1   1   9   99.19   14.90 
  -1   1  -9   67.69   11.50 
   1  -1  -9   59.49   11.90 
  -1   1  10   28.90    8.50 
  -1   1  10   -1.30    7.30 
   1   1 -10   10.00    7.80 
   1  -1  10    6.80    7.60 
  -1  -1 -10   16.50    6.80 
   1  -1  10   22.60    8.60 
  -1  -1 -10    8.00    6.90 
   1   1 -10    3.00    7.50 
   1   1 -10   -6.60    6.60 
  -1  -1 -10    8.10    7.30 
  -1   1  10   -0.40    8.90 
   1   1  10    2.30    7.80 
   1   1  10   11.40    8.90 
   1  -1 -10   -0.30    6.40 
  -1   1 -10    5.30    6.30 
  -1   1 -10   -0.60    8.00 
  -1  -1  10    7.10    8.30 
   1  -1 -10    7.80    7.10 
  -1  -1  10    8.80    8.30 
  -1   1 -10   24.50    6.80 
  -1  -1  10   26.10    9.10 
   1  -1 -10    4.00    7.10 
  -2  -1   0  258.17   27.10 
   2  -1   0  294.17   26.40 
   2  -1   0  282.67   26.40 
   2   1   0  278.67   26.20 
  -2   1   0  269.37   26.30 
   2  -1   0  268.17   27.40 
  -2  -1   0  261.47   26.20 
  -2   1   0  275.47   27.00 
   2   1   0  243.78   26.80 
  -2  -1  -1  977.40   92.19 
   2  -1   1  950.60   92.69 
   2  -1   1  969.00   92.09 
  -2   1   1  847.82   92.49 
   2   1  -1  936.21   93.39 
   2   1  -1 1025.90   92.69 
   2  -1  -1  931.11   93.49 
   2  -1  -1 1018.30   92.69 
  -2   1  -1 1039.60   92.29 
   2   1   1  939.51   92.59 
   2   1   1  956.70   92.09 
  -2  -1   1  951.60   93.39 
  -2  -1   1  929.51   92.49 
  -2  -1  -2 6557.44  609.74 
   2   1  -2 6279.07  611.04 
  -2  -1  -2 5718.33  609.74 
   2   1  -2 6743.33  610.24 
   2  -1   2 6300.37  610.24 
   2   1   2 5997.40  609.64 
   2  -1  -2 6617.94  610.14 
  -2   1  -2 6785.42  609.84 
  -2  -1   2 6379.06  610.84 
   2   1   2 6326.67  610.14 
   2  -1  -2 6295.47  611.04 
   2   1  -3   87.89   15.70 
   2  -1   3  114.59   14.30 
   2   1  -3   99.79   12.80 
  -2  -1  -3  104.19   12.60 
  -2  -1  -3   85.99   12.40 
   2  -1  -3   82.59   15.10 
   2   1   3  112.69   13.70 
   2  -1  -3   66.39   11.50 
  -2   1  -3   90.69   12.60 
  -2  -1   3   67.79   13.90 
  -2  -1  -4  181.88   22.80 
  -2  -1  -4  188.68   22.40 
  -2  -1  -4  197.68   21.90 
   2  -1   4  211.38   24.80 
   2   1  -4  192.58   27.30 
   2   1  -4  205.28   23.60 
   2  -1  -4  205.28   27.90 
  -2  -1   4  200.58   29.70 
  -2   1  -4  198.98   23.90 
  -2   1  -4  199.58   22.60 
   2   1   4  193.48   24.30 
   2  -1  -4  193.38   23.40 
  -2   1  -4  175.88   21.70 
  -2  -1  -5   63.29   10.70 
  -2  -1  -5   63.09   11.20 
   2  -1   5   70.09   15.00 
   2   1  -5   39.50   10.80 
   2   1  -5   93.09   20.10 
  -2   1  -5   80.59   12.40 
   2  -1  -5   70.39   18.40 
  -2  -1   5   47.30   17.60 
   2  -1  -5   58.39   11.90 
   2   1   5   74.19   14.80 
  -2   1  -5   52.19   10.70 
  -2   1   6  320.77   29.60 
   2  -1   6  301.67   29.00 
   2   1  -6  322.97   30.50 
   2   1  -6  306.07   37.40 
  -2   1   6  225.78   29.30 
  -2  -1  -6  263.07   28.50 
   2   1  -6  234.18   27.90 
  -2  -1  -6  237.88   28.60 
  -2  -1  -6  242.18   28.80 
  -2  -1  -6  232.98   27.10 
   2  -1   6  216.48   28.80 
  -2   1   6  218.68   37.70 
  -2   1  -6  238.48   28.40 
   2  -1  -6  251.87   27.90 
   2   1   6  273.47   28.80 
   2  -1  -6  231.58   29.00 
   2   1   6  294.97   28.90 
  -2  -1   6  285.07   28.80 
  -2  -1   6  257.97   29.20 
  -2  -1   6  250.07   35.50 
   2  -1  -6  287.07   36.40 
  -2   1  -6  226.88   28.90 
   2  -1  -6  241.38   29.20 
  -2   1  -6  278.57   27.60 
   2   1  -7   23.10   12.90 
   2  -1   7   36.80   11.60 
  -2   1   7   14.00   11.30 
  -2  -1  -7   35.30   10.90 
  -2  -1  -7   28.70   11.50 
   2  -1   7   36.30   11.60 
  -2  -1  -7   26.20   12.30 
  -2  -1  -7   29.00    9.30 
   2   1  -7   28.70    9.80 
  -2   1   7   29.90   11.40 
  -2   1  -7   28.40    9.40 
  -2  -1   7   13.40   10.50 
  -2  -1   7   19.80   11.30 
   2  -1  -7   17.60   13.60 
   2   1   7   35.70   12.40 
   2  -1  -7   23.70   10.10 
  -2   1  -7   38.10   12.40 
  -2   1  -7    5.50   10.90 
   2  -1  -7   50.39   11.60 
  -2   1  -7   11.70   12.40 
   2  -1  -7    5.30   11.70 
   2   1   7   20.50   11.80 
   2  -1   8  143.89   21.20 
  -2  -1  -8  149.69   19.10 
  -2   1   8  175.48   22.40 
  -2  -1  -8  145.59   20.70 
  -2  -1  -8  138.29   20.40 
  -2  -1  -8  167.68   21.70 
   2   1  -8  146.39   19.90 
  -2   1   8  161.48   22.10 
   2   1  -8  149.09   22.20 
   2   1  -8  198.08   23.60 
   2  -1   8  139.99   20.80 
   2   1   8  188.78   22.60 
   2  -1  -8  168.88   20.10 
  -2   1  -8  168.18   21.80 
  -2  -1   8  140.49   21.70 
  -2   1  -8  169.88   21.00 
   2  -1  -8  138.49   21.50 
   2  -1  -8  165.68   23.40 
  -2   1  -8  132.49   18.90 
  -2  -1   8  200.88   22.80 
   2   1   8  160.78   21.90 
   2  -1  -8  178.78   22.80 
  -2  -1  -9    4.50    8.80 
   2   1  -9   13.80   11.50 
   2   1  -9    6.80   11.60 
  -2   1   9   17.10   11.20 
   2  -1   9   26.60   10.80 
  -2  -1  -9   10.10    9.80 
  -2  -1  -9    0.40    8.10 
   2   1  -9   -0.80    9.10 
  -2  -1  -9    7.90    8.70 
  -2   1   9    1.60   11.40 
   2  -1   9   -8.40    9.10 
   2   1   9   12.70   11.00 
  -2  -1   9  -17.50   10.10 
  -2   1  -9    7.80    8.40 
   2  -1  -9    8.90   10.60 
  -2   1  -9   15.60    9.30 
   2   1   9   -0.40   10.40 
   2  -1  -9   19.00   11.70 
  -2  -1   9    4.70   11.50 
   2  -1  -9   19.20    9.50 
  -2   1  -9    9.30   11.20 
  -2  -1   9    8.30   11.20 
  -2  -1 -10   35.80    6.90 
  -2   1  10   34.60    9.60 
  -2  -1 -10   42.50    8.30 
  -2  -1 -10   32.10    8.00 
   2  -1  10   29.80    9.10 
  -2   1  10   35.20    9.60 
  -2   1  10   36.20    9.00 
   2   1 -10   33.80    8.90 
   2  -1  10   28.60    8.50 
   2   1 -10   33.40    7.80 
   2   1 -10   20.70    8.20 
  -2  -1  10   47.60    9.70 
  -2  -1  10   36.10    9.20 
  -2   1 -10   25.30    8.50 
   2   1  10   20.60    8.80 
   2   1  10   48.10    9.90 
   2  -1 -10   18.30    7.40 
   2  -1 -10   30.40    7.70 
  -2   1 -10   30.20    7.20 
   2  -1 -10   24.10    8.60 
  -2   1 -10   27.90    7.60 
  -2  -1  10   16.70    9.80 
  -3  -1   0  761.82   75.09 
   3   1   0  846.62   75.49 
   3  -1   0  813.12   75.49 
   3  -1   0  823.02   75.29 
  -3  -1   0  784.52   76.29 
  -3   1   0  787.72   76.09 
  -3   1   0  732.03   75.19 
   3   1   0  764.82   75.09 
   3   1   0  758.02   75.99 
  -3  -1   0  771.22   74.99 
   3  -1   0  750.42   76.39 
   3  -1   1 7416.76  702.83 
  -3  -1  -1 7671.53  703.23 
   3  -1   1 6891.81  702.13 
   3  -1   1 7441.76  703.13 
  -3   1   1 7282.27  703.53 
   3   1  -1 7418.96  703.73 
  -3   1   1 6585.94  702.73 
   3   1  -1 7769.52  702.73 
   3  -1  -1 7577.54  702.73 
   3  -1  -1 7159.68  703.73 
   3   1   1 7055.69  702.53 
   3   1   1 7428.46  702.83 
  -3  -1   1 7434.96  703.53 
  -3   1  -1 7544.85  702.83 
   3   1  -2   55.09   11.90 
  -3  -1  -2   58.49    8.20 
  -3   1   2   59.49   11.40 
   3  -1   2   68.59   10.50 
   3   1  -2   47.40    8.80 
   3  -1  -2   66.69    9.50 
  -3  -1   2   58.89   11.40 
   3   1   2   53.19    7.40 
   3  -1  -2   74.79   14.20 
  -3   1  -2   67.69    8.70 
   3   1   2   59.29    9.90 
  -3  -1  -3   14.80    5.30 
   3   1  -3    9.70   10.60 
  -3  -1  -3   10.50    7.00 
  -3  -1  -3   10.00    5.40 
   3  -1   3   20.60    8.60 
   3   1  -3    7.40    6.50 
  -3   1  -3    4.60    6.90 
   3  -1  -3    9.30    7.30 
   3   1   3    6.10    7.80 
  -3  -1   3   10.80    9.90 
  -3   1  -3   16.60    5.60 
   3  -1  -3   20.30   12.30 
   3  -1   4   95.89   14.90 
  -3  -1  -4   81.19   10.90 
  -3  -1  -4   71.99   11.50 
   3   1  -4   66.59   12.30 
  -3   1   4   67.09   17.20 
   3   1  -4   47.10   15.50 
   3  -1  -4   65.49   17.10 
  -3   1  -4   61.99   11.20 
   3  -1  -4   52.99   11.60 
   3   1   4   81.79   14.50 
  -3  -1   4   60.59   16.30 
  -3   1  -4   70.59   12.40 
  -3   1  -4   86.09   11.20 
   3   1  -5   30.30   16.80 
  -3   1   5   17.90   16.80 
  -3  -1  -5   14.10    8.10 
   3   1  -5   14.90    8.40 
   3  -1   5   15.20   12.20 
   3   1   5   30.70   12.40 
  -3  -1   5   17.10   15.50 
   3  -1  -5   23.40    9.60 
   3  -1  -5   36.80   17.20 
  -3   1  -5   19.50    8.00 
  -3   1  -5   14.80    8.80 
  -3  -1  -6  162.68   21.20 
   3  -1   6  125.29   21.60 
  -3   1   6  171.68   21.50 
   3   1  -6  219.38   32.40 
   3  -1   6  148.99   20.50 
  -3  -1  -6  165.68   20.20 
   3  -1   6  235.78   28.20 
   3   1  -6  188.38   21.70 
  -3  -1  -6  175.08   21.50 
  -3  -1  -6  168.48   20.70 
   3  -1   6  163.98   21.50 
  -3   1   6  158.18   21.10 
  -3  -1  -6  192.58   20.60 
  -3   1   6  167.78   31.10 
   3   1  -6  183.28   20.50 
   3   1  -6  187.58   22.90 
  -3  -1   6  175.28   22.00 
  -3  -1   6  212.48   21.70 
  -3   1  -6  188.48   20.90 
   3  -1  -6  179.08   20.40 
   3   1   6  172.98   23.10 
   3  -1  -6  208.78   31.70 
   3  -1  -6  156.78   21.70 
  -3   1  -6  155.18   20.90 
  -3   1  -6  172.88   21.60 
  -3  -1   6  138.09   27.70 
   3  -1  -6  169.58   22.10 
  -3  -1   6  168.28   21.00 
   3   1   6  148.79   20.70 
  -3   1  -6  142.19   21.20 
   3   1   6  183.68   25.90 
  -3   1  -6  178.78   20.40 
  -3   1  -6  197.38   20.10 
   3   1   6  177.68   21.80 
   3   1  -7   38.00   13.80 
   3  -1   7   12.30   10.60 
  -3  -1  -7   28.80    9.10 
   3   1  -7    2.40    9.40 
  -3  -1  -7   18.30    9.60 
  -3   1   7   19.70   11.00 
  -3   1   7   28.60   11.70 
  -3  -1  -7   25.10   11.80 
  -3  -1  -7   27.00   10.80 
   3  -1   7   28.30   11.40 
   3  -1  -7   20.40   11.60 
  -3  -1   7   18.80   11.00 
  -3  -1   7   31.30   11.20 
   3  -1  -7   29.00   13.90 
   3   1   7   32.80   11.80 
  -3  -1   7   23.90   10.80 
   3   1   7   28.20   11.90 
   3  -1  -7   18.70   10.50 
  -3   1  -7   31.80   11.50 
  -3   1  -7   -4.40   10.90 
  -3   1  -7   23.70    9.30 
  -3   1  -7   22.60   10.20 
  -3   1  -7   23.30   10.00 
   3  -1   8  238.58   29.50 
   3  -1   8  268.27   30.30 
  -3  -1  -8  267.47   29.00 
  -3  -1  -8  241.48   27.80 
  -3   1   8  236.18   30.20 
   3   1  -8  275.37   30.60 
   3   1  -8  255.37   29.70 
   3   1  -8  238.48   28.90 
  -3  -1  -8  251.07   29.60 
  -3  -1  -8  231.28   27.40 
  -3   1   8  228.58   29.10 
   3  -1  -8  209.18   28.80 
   3  -1  -8  221.18   28.00 
   3  -1  -8  239.58   27.90 
  -3   1  -8  238.98   27.20 
  -3   1  -8  248.88   28.50 
   3  -1  -8  261.57   30.10 
  -3   1  -8  243.88   30.00 
   3   1   8  275.77   30.40 
  -3  -1   8  289.97   29.90 
  -3   1  -8  266.07   29.10 
  -3  -1   8  213.58   28.60 
   3   1   8  270.87   29.70 
   3  -1   9   10.30    9.50 
   3  -1   9    4.40   10.90 
   3   1  -9   12.30    9.10 
   3   1  -9   11.20   12.30 
  -3  -1  -9    6.80    8.20 
   3   1  -9   16.40   11.60 
  -3  -1  -9   14.50    8.30 
  -3   1   9   17.40   10.70 
  -3   1   9    5.70   10.60 
  -3  -1  -9   -9.20    9.10 
  -3  -1  -9    0.30    9.20 
   3  -1  -9   10.90    9.30 
   3  -1  -9   -2.90   10.10 
  -3   1  -9   29.00    8.60 
  -3  -1   9   11.90   11.50 
   3   1   9   27.00   10.40 
  -3   1  -9   18.60   10.60 
  -3  -1   9    0.40   11.50 
   3  -1  -9   -2.10   11.90 
  -3   1  -9   12.80    8.70 
  -3  -1   9   -0.20    9.90 
   3   1   9   25.10   11.10 
   3   1 -10   82.59   11.80 
  -3   1  10   97.39   12.40 
  -3   1  10   88.39   12.60 
   3  -1  10   36.90   10.80 
  -3  -1 -10   86.29   10.40 
   3   1 -10   80.09   10.90 
  -3  -1 -10   71.99   10.80 
  -3  -1 -10   64.79   10.40 
   3  -1  10   82.99   11.80 
   3   1 -10   84.09   12.20 
  -3   1  10   46.80   10.90 
  -3   1 -10   75.09   10.30 
  -3   1 -10   82.89   11.30 
   3   1  10   86.19   11.70 
   3   1  10   53.89   11.40 
   3  -1 -10   61.29   10.50 
   3  -1 -10   63.49   11.60 
  -3  -1  10  101.49   12.30 
   3  -1 -10   93.89   11.40 
  -3  -1  10   63.69   11.00 
  -3  -1  10   68.29   11.80 
  -3  -1  10   78.19   12.30 
  -3   1 -10   82.19   10.00 
  -4   1   0  967.60   93.09 
  -4  -1   0  912.31   91.59 
  -4  -1   0  878.51   91.59 
   4  -1   0 1033.00   92.29 
   4   1   0  937.01   91.69 
  -4  -1   0 1013.50   93.29 
  -4   1   0  897.91   91.79 
   4   1   0  923.81   92.99 
   4   1   0 1047.50   92.29 
   4  -1   0  945.41   93.49 
  -4   1   1 1450.75  135.19 
   4  -1   1 1401.76  134.19 
   4   1  -1 1431.76  135.39 
   4   1  -1 1469.55  133.89 
  -4  -1  -1 1450.55  134.79 
   4  -1   1 1361.56  134.59 
   4  -1   1 1280.07  133.09 
  -4  -1  -1 1294.47  133.49 
  -4   1  -1 1299.67  133.29 
  -4  -1   1 1468.55  135.29 
   4   1   1 1287.77  133.89 
   4  -1  -1 1429.16  133.99 
   4  -1  -1 1376.56  135.49 
   4   1   1 1469.05  134.19 
  -4   1  -1 1401.16  134.29 
   4  -1   2  522.65   51.39 
  -4   1   2  520.45   53.59 
   4   1  -2  530.15   51.09 
  -4  -1  -2  483.35   49.60 
   4   1  -2  497.35   53.09 
  -4   1  -2  509.25   49.80 
   4   1   2  520.05   51.39 
   4  -1  -2  530.35   51.19 
  -4  -1   2  518.75   53.29 
   4  -1  -2  507.85   53.49 
  -4  -1  -3  132.79   16.80 
   4  -1   3  154.48   18.60 
  -4  -1  -3  133.09   14.80 
   4   1  -3  122.59   21.00 
  -4   1   3  130.09   20.00 
   4   1  -3  131.09   17.60 
   4  -1  -3  130.29   17.60 
   4   1   3  130.99   18.70 
   4  -1  -3  122.49   22.50 
  -4   1  -3  108.59   15.80 
  -4   1  -3  131.49   15.20 
  -4  -1   3  158.38   20.80 
  -4   1   4  828.82   80.09 
   4   1  -4  741.93   78.59 
   4   1  -4  803.62   75.79 
  -4  -1  -4  663.83   76.09 
   4  -1   4  729.23   75.99 
  -4  -1  -4  752.22   74.89 
  -4   1  -4  720.83   74.79 
   4  -1  -4  810.22   79.49 
   4   1   4  735.43   75.99 
  -4  -1   4  821.72   79.49 
  -4   1  -4  714.43   74.19 
   4  -1  -4  788.42   75.79 
   4   1  -5  259.47   34.50 
   4   1  -5  201.78   27.10 
  -4  -1  -5  238.28   26.90 
  -4   1   5  227.28   32.40 
   4  -1   5  227.58   29.70 
   4   1   5  208.68   29.00 
   4  -1  -5  237.58   28.30 
  -4   1  -5  229.08   26.90 
   4  -1  -5  247.18   35.30 
  -4  -1   5  243.18   37.10 
  -4  -1  -6  112.09   15.00 
   4  -1   6  168.78   24.00 
   4  -1   6  118.09   19.50 
  -4   1   6   88.69   25.70 
  -4  -1  -6  110.99   15.90 
  -4   1   6  125.69   17.50 
   4  -1   6  145.19   17.50 
   4   1  -6  105.99   15.90 
  -4  -1  -6  140.39   18.40 
   4   1  -6  112.29   17.80 
   4  -1   6  149.69   18.10 
  -4   1   6  108.39   16.80 
  -4  -1  -6  130.69   17.40 
   4   1  -6  182.78   30.40 
  -4  -1  -6  121.79   16.20 
  -4  -1   6  118.89   16.90 
  -4  -1   6  150.38   17.80 
   4   1   6  137.09   17.60 
  -4  -1   6   92.59   24.30 
  -4  -1   6  117.99   17.20 
   4   1   6   86.89   20.10 
   4  -1  -6  163.98   29.50 
  -4   1  -6  139.49   16.60 
   4  -1  -6   97.09   17.30 
   4  -1  -6  133.69   16.40 
   4   1   6  161.78   18.70 
   4  -1  -6  119.89   18.20 
  -4   1  -6   99.49   15.00 
  -4   1  -6  103.69   16.50 
  -4   1  -6  113.19   16.50 
  -4   1  -6  111.89   17.30 
   4   1   6  110.89   19.80 
  -4   1  -6  117.49   17.90 
   4  -1   7  285.57   31.60 
   4   1  -7  306.97   33.90 
  -4  -1  -7  305.87   30.50 
  -4  -1  -7  286.37   31.30 
   4  -1   7  269.27   31.50 
  -4   1   7  250.27   31.90 
  -4   1   7  299.37   31.90 
  -4   1   7  275.27   31.90 
   4  -1   7  305.07   31.90 
   4   1  -7  256.57   30.90 
  -4  -1  -7  278.37   29.60 
   4  -1   7  278.17   32.50 
  -4  -1  -7  268.37   31.10 
   4   1  -7  252.97   31.20 
  -4   1  -7  266.27   30.70 
  -4   1  -7  263.87   29.70 
  -4   1  -7  273.97   32.30 
  -4   1  -7  234.78   30.70 
   4  -1  -7  261.37   30.90 
  -4  -1   7  270.47   31.80 
  -4   1  -7  316.97   31.30 
   4   1   7  279.17   32.00 
   4   1   7  248.58   31.90 
  -4  -1   7  302.57   32.40 
   4  -1  -7  304.17   32.40 
   4   1   7  276.87   32.90 
  -4  -1   7  263.47   31.20 
   4  -1  -7  328.87   33.40 
  -4   1   8   33.20   12.80 
   4   1  -8   52.89   15.50 
  -4   1   8   21.90   13.00 
   4  -1   8   51.89   12.70 
  -4  -1  -8   32.20   11.10 
  -4  -1  -8   11.60   10.70 
   4  -1   8   32.50   12.40 
  -4  -1  -8   43.90   10.00 
   4   1  -8   42.30   11.50 
  -4  -1  -8   33.20   12.20 
   4   1  -8   47.30   15.30 
  -4  -1   8   37.70   12.00 
   4  -1  -8   38.20   16.00 
  -4  -1   8   40.30   12.70 
  -4   1  -8   44.50   11.10 
  -4   1  -8   33.50   12.70 
   4  -1  -8   16.70   12.50 
   4  -1  -8   21.60   11.60 
   4   1   8   39.60   14.20 
  -4   1  -8   44.40   10.00 
   4  -1  -8   35.60   13.90 
   4   1   8   46.60   12.60 
  -4  -1   8   37.60   14.80 
  -4   1  -8   29.80   10.50 
   4   1   8   39.30   12.10 
   4  -1   9   25.30   10.50 
  -4  -1  -9   38.60    8.20 
   4   1  -9   25.70   12.30 
  -4  -1  -9   20.70    8.60 
  -4  -1  -9   23.50   10.20 
   4   1  -9   34.80   12.40 
  -4   1   9   38.10   11.40 
  -4   1   9   12.50   11.00 
  -4  -1  -9   20.00    9.30 
   4   1  -9    8.90    9.00 
   4  -1   9   26.80   11.50 
  -4   1   9   32.00   11.10 
  -4  -1   9   44.30   11.70 
   4  -1  -9   13.00   10.30 
  -4  -1   9   36.00   12.20 
  -4   1  -9   13.90    8.50 
   4  -1  -9   20.10    9.60 
   4   1   9   35.90   10.90 
  -4   1  -9   31.40    8.20 
  -4   1  -9   37.30   10.90 
   4  -1  -9   45.00   12.80 
  -4   1  -9   12.90    8.90 
   4   1   9   22.60   10.90 
  -4  -1   9   17.80   10.30 
   4   1 -10   18.20    6.80 
  -4  -1 -10   24.60    7.20 
   4   1 -10   23.80    7.70 
  -4   1  10    8.60    8.70 
  -4   1  10   13.50    7.30 
   4   1 -10    7.30    8.10 
  -4   1  10   21.90    8.10 
  -4  -1 -10   14.80    6.40 
  -4   1  10   34.50    8.00 
   4  -1  10    3.80    7.10 
   4  -1  10   21.00    7.50 
  -4  -1 -10   13.10    6.10 
  -4   1 -10   14.40    5.60 
  -4  -1  10   11.00    7.00 
   4  -1 -10   23.80    8.10 
   4  -1 -10   11.00    6.80 
  -4  -1  10   11.20    7.50 
   4  -1 -10   20.50    7.00 
   4   1  10   25.40    7.40 
   4   1  10    6.40    7.20 
  -4  -1  10   11.10    8.70 
  -4   1 -10   24.70    7.20 
  -4   1 -10   14.70    5.70 
  -4  -1  10   16.50    7.70 
   5   1   0  175.88   18.00 
  -5   1   0  158.78   18.00 
   5   1   0  169.68   21.30 
   5  -1   0  174.98   22.60 
   5   1   0  201.48   19.70 
   5  -1   0  192.98   19.50 
  -5   1   0  187.68   21.90 
  -5  -1   0  196.68   22.80 
  -5  -1   0  171.48   17.70 
   5   1  -1  162.48   21.60 
  -5   1   1  168.98   21.60 
   5  -1   1  137.99   15.20 
  -5  -1  -1  144.99   15.80 
   5  -1   1  166.18   19.40 
   5  -1   1  162.88   18.20 
   5   1  -1  150.68   17.20 
  -5  -1  -1  168.88   20.50 
   5   1   1  147.49   17.70 
   5  -1  -1  154.78   17.60 
   5  -1  -1  148.99   21.70 
   5   1   1  157.68   18.00 
  -5   1  -1  163.78   19.30 
  -5  -1   1  173.08   22.30 
  -5  -1  -2    8.40    7.00 
  -5   1   2   26.10   11.20 
   5  -1   2   32.00    9.20 
   5   1  -2   24.00   12.60 
   5   1  -2   20.00    7.20 
   5  -1  -2   19.50    7.30 
   5  -1  -2   32.10   13.60 
  -5   1  -2   19.60    8.20 
  -5   1  -2   23.30    3.90 
   5   1   2   23.40    9.00 
  -5  -1   2   21.80   11.10 
  -5   1   3  333.67   38.30 
   5   1  -3  302.37   33.00 
   5   1  -3  331.37   37.60 
   5  -1   3  266.67   33.60 
  -5  -1  -3  301.87   32.40 
  -5   1  -3  300.97   30.80 
  -5   1  -3  280.47   32.10 
  -5  -1   3  300.57   37.50 
   5  -1  -3  315.47   37.40 
   5   1   3  324.77   33.90 
   5  -1  -3  315.97   33.30 
   5   1  -4  391.56   47.60 
   5  -1   4  394.76   43.70 
  -5   1   4  463.65   50.09 
   5   1  -4  384.06   42.90 
  -5  -1  -4  418.66   42.40 
   5  -1  -4  436.76   48.50 
  -5  -1   4  420.86   48.30 
   5   1   4  373.26   43.90 
   5  -1  -4  385.66   42.90 
  -5   1  -4  426.06   42.60 
   5   1  -5  201.28   31.10 
  -5  -1  -5  147.29   20.20 
   5  -1   5  132.89   23.10 
  -5   1   5  159.08   28.20 
   5   1   5  155.58   23.60 
  -5  -1   5  125.29   25.50 
  -5   1  -5  168.38   21.10 
   5  -1  -5  176.38   30.70 
  -5   1   6   53.09   22.20 
   5  -1   6   65.19   12.80 
   5  -1   6   39.30   15.50 
  -5  -1  -6   49.00   10.30 
   5   1  -6   29.10   10.80 
   5   1  -6   64.89   14.10 
  -5  -1  -6   46.40    9.80 
  -5  -1  -6   76.09   12.20 
   5  -1   6   44.20   17.50 
  -5  -1  -6   65.89   12.40 
  -5  -1  -6   53.79   13.20 
  -5   1   6   43.30   12.10 
   5   1  -6   74.29   22.10 
   5  -1   6   55.59   11.60 
  -5   1  -6   65.09   11.70 
  -5   1  -6   62.39   12.30 
  -5   1  -6   48.20   10.40 
  -5  -1   6   42.10   11.70 
   5   1   6   50.49   15.40 
   5  -1  -6   58.59   14.50 
   5   1   6   53.09   16.40 
   5   1   6   52.69   12.50 
  -5   1  -6   52.19   10.00 
  -5  -1   6   50.89   11.60 
  -5   1  -6   42.00   11.70 
   5   1   6   52.49   11.90 
   5  -1  -6   60.79   11.20 
  -5   1  -6   63.69   13.50 
  -5  -1   6   51.19   13.40 
  -5  -1   6   30.90   20.20 
   5  -1  -6   87.99   22.10 
   5  -1   7   69.99   15.10 
  -5  -1  -7   71.79   14.00 
  -5  -1  -7   66.59   12.40 
  -5  -1  -7   52.09   10.90 
   5   1  -7   62.09   13.10 
  -5   1   7   47.00   13.40 
  -5  -1  -7   97.59   17.30 
   5  -1   7   95.79   17.50 
   5  -1   7   52.89   13.60 
  -5  -1  -7   65.89   12.10 
  -5   1   7   52.69   14.10 
   5  -1   7   75.09   13.20 
  -5   1   7   28.80   13.40 
   5   1  -7   66.49   17.10 
   5   1  -7   52.49   15.00 
   5   1   7   73.59   14.50 
  -5   1  -7   70.49   13.20 
   5   1   7   36.00   16.30 
  -5   1  -7   63.39   19.30 
   5   1   7   75.39   13.40 
  -5  -1   7   57.99   13.70 
  -5   1  -7   56.69   13.60 
  -5   1  -7   62.59   13.40 
  -5   1  -7   69.19   11.30 
   5  -1  -7   52.19   16.60 
  -5  -1   7   73.49   14.00 
   5  -1  -7   49.50   13.00 
  -5  -1   7   37.40   14.00 
   5  -1  -7   81.39   15.50 
  -5   1  -7   63.79   11.70 
  -5  -1  -8  325.37   34.90 
   5  -1   8  343.87   35.00 
   5   1  -8  307.77   37.50 
  -5   1   8  333.57   35.60 
   5  -1   8  316.77   36.50 
   5   1  -8  316.67   35.10 
  -5  -1  -8  370.36   35.70 
   5  -1   8  289.57   35.30 
  -5   1   8  286.27   35.10 
  -5   1   8  347.87   35.40 
   5  -1   8  278.67   36.10 
  -5  -1  -8  308.07   34.30 
  -5  -1  -8  330.67   33.10 
   5   1   8  305.17   35.90 
   5   1   8  331.47   35.50 
   5  -1  -8  332.37   35.50 
   5   1   8  267.67   35.00 
  -5  -1   8  285.27   35.00 
   5  -1  -8  263.47   35.90 
  -5   1  -8  314.67   33.20 
  -5   1  -8  307.37   34.50 
   5  -1  -8  317.67   35.60 
  -5  -1   8  341.17   35.80 
   5  -1  -8  343.77   37.50 
  -5   1  -8  343.97   35.80 
  -5  -1   8  329.37   36.20 
  -5   1  -8  293.17   34.20 
   5   1   8  359.16   36.50 
   5   1  -9   12.10   10.90 
  -5  -1  -9   19.70   13.10 
   5   1  -9   37.10   12.80 
  -5  -1  -9   37.50   10.00 
  -5   1   9   24.20    9.90 
  -5   1   9   10.70   10.90 
  -5  -1  -9   22.40    8.10 
  -5   1   9   -3.40    9.10 
   5  -1   9    0.10    9.00 
   5  -1   9   29.90    9.70 
   5   1  -9   19.60    9.20 
  -5  -1  -9   15.60    8.30 
  -5  -1   9   30.70   10.20 
   5   1   9   21.60    9.70 
   5   1   9   21.80    9.90 
  -5   1  -9   13.10    7.70 
   5  -1  -9   37.00   12.70 
   5  -1  -9   26.80   10.10 
  -5  -1   9    8.30   10.70 
   5  -1  -9   22.40   10.30 
  -5   1  -9   10.20    9.60 
  -5   1  -9   18.40    7.40 
  -5   1  -9   26.60    8.20 
  -5  -1   9   22.30    9.70 
  -5   1  10    6.90    8.00 
  -5   1  10   -0.60    6.10 
  -5  -1 -10    9.40    5.80 
   5  -1  10    0.90    7.10 
   5   1 -10   -2.80    7.30 
   5  -1  10   16.80    6.70 
  -5   1  10    1.60    6.30 
  -5  -1 -10   11.60    6.50 
   5   1 -10    3.10    6.60 
   5   1 -10  -11.90    5.50 
  -5  -1 -10    0.00    5.00 
   5  -1 -10   -1.90    6.30 
  -5   1 -10    8.50    6.40 
  -5  -1  10   -6.20    5.50 
  -5  -1  10   -0.40    6.50 
  -5   1 -10    5.10    5.40 
   5   1  10   -9.40    6.40 
  -5   1 -10   -5.40    5.10 
   5  -1 -10   -1.30    7.10 
  -5  -1  10   -8.10    7.60 
   6  -1   0 2463.05  222.78 
   6   1   0 2406.36  222.78 
  -6   1   0 2335.27  223.68 
   6  -1   0 2267.37  224.28 
   6   1   0 2103.59  221.78 
   6   1   0 2206.18  223.68 
  -6  -1   0 2423.56  223.98 
  -6  -1  -1  876.01   86.29 
   6   1  -1  903.31   85.99 
   6  -1   1  905.31   86.69 
   6  -1   1  751.92   84.99 
  -6   1   1  940.31   88.49 
   6   1  -1  932.31   88.69 
  -6  -1  -1  768.32   85.09 
  -6  -1  -1  937.51   87.99 
   6  -1   1  851.81   87.49 
   6   1   1  807.62   86.59 
  -6   1  -1  913.81   87.49 
   6  -1  -1  926.31   89.19 
  -6   1  -1  848.52   86.39 
   6  -1  -1  982.40   86.29 
   6  -1  -1  930.61   86.19 
   6   1   1  925.91   86.69 
  -6  -1   1  925.41   88.39 
  -6  -1  -2  355.86   36.60 
  -6   1   2  357.46   40.30 
   6  -1   2  342.97   37.30 
   6   1  -2  365.56   36.60 
  -6  -1  -2  311.17   35.30 
   6   1  -2  375.96   40.40 
   6   1   2  351.26   37.50 
  -6  -1   2  368.36   40.40 
   6  -1  -2  368.86   40.70 
   6  -1  -2  368.66   36.80 
  -6   1  -2  340.87   36.80 
   6  -1   3   29.60   11.70 
   6   1  -3   56.69   10.70 
  -6   1   3   28.30   13.40 
   6   1  -3   44.00   16.60 
  -6  -1  -3   37.60    9.80 
  -6   1  -3   44.30   10.80 
   6  -1  -3   42.00   10.60 
   6   1   3   26.90   11.80 
  -6  -1   3   47.90   15.10 
   6  -1  -3   51.89   17.80 
   6   1  -4   18.90    9.00 
  -6  -1  -4   19.50   10.00 
  -6   1   4   32.40   16.10 
   6  -1   4   26.40   12.60 
   6   1  -4   17.60   15.50 
  -6   1  -4   27.00   10.40 
   6  -1  -4   25.30    9.40 
  -6  -1   4    7.70   14.20 
   6   1   4   22.00   12.00 
   6  -1  -4   18.10   17.00 
  -6  -1  -5  166.78   18.30 
   6  -1   5  134.79   19.90 
   6   1  -5  138.29   20.50 
  -6  -1  -5  141.89   17.00 
   6   1  -5  161.08   28.70 
  -6  -1  -5  124.99   18.80 
   6  -1   5  145.59   23.10 
  -6  -1  -5  153.18   17.60 
  -6   1   5  116.69   25.30 
   6  -1  -5  141.49   17.50 
  -6   1  -5  158.28   17.90 
  -6  -1   5  111.29   24.00 
   6  -1  -5  184.58   30.90 
  -6  -1   5  142.89   19.00 
  -6   1  -5  128.39   17.20 
  -6   1  -5  101.39   18.40 
   6   1   5  168.18   24.00 
   6  -1  -5  138.19   19.90 
  -6   1  -5  110.19   18.70 
   6   1   5  114.69   20.30 
   6  -1   6  213.38   22.50 
  -6  -1  -6  179.18   19.50 
   6  -1   6  170.58   22.20 
  -6  -1  -6  169.08   20.90 
   6   1  -6  224.88   34.80 
  -6  -1  -6  163.48   23.30 
   6   1  -6  162.38   20.70 
   6  -1   6  162.88   23.30 
  -6  -1  -6  159.08   20.40 
  -6  -1  -6  154.18   20.30 
  -6   1   6  114.59   28.40 
   6  -1   6  174.28   27.40 
   6   1  -6  159.08   22.90 
  -6   1   6  190.18   22.00 
  -6   1  -6  150.68   22.70 
  -6   1  -6  158.08   20.00 
  -6  -1   6  181.98   23.40 
   6  -1  -6  220.48   33.40 
  -6  -1   6  214.78   32.70 
  -6   1  -6  189.58   21.90 
  -6   1  -6  189.58   21.20 
   6   1   6  185.68   22.30 
  -6  -1   6  174.98   21.20 
  -6  -1   6  153.08   21.20 
   6   1   6  185.98   25.20 
  -6   1  -6  156.18   20.90 
  -6  -1   6  155.98   23.10 
  -6   1  -6  166.48   19.40 
   6  -1  -6  159.38   23.30 
   6  -1  -6  175.88   20.90 
   6   1   6  149.79   26.20 
  -6  -1  -7   83.29   15.20 
  -6  -1  -7  101.89   18.10 
  -6   1   7  111.09   17.60 
   6  -1   7  121.49   18.30 
   6  -1   7  109.79   20.30 
   6   1  -7  118.79   16.70 
  -6  -1  -7  110.19   15.30 
  -6  -1  -7   96.79   16.30 
   6   1  -7  110.79   19.00 
  -6   1   7  103.49   18.40 
   6   1  -7   83.19   19.20 
  -6   1   7  110.09   16.90 
  -6  -1  -7  113.09   14.20 
   6  -1   7  100.39   17.00 
  -6   1  -7  113.19   17.30 
   6  -1  -7  126.99   17.10 
  -6  -1   7  112.79   16.40 
  -6   1  -7   65.09   14.50 
   6   1   7  129.79   21.10 
  -6   1  -7   76.99   17.30 
  -6  -1   7  108.99   18.60 
  -6   1  -7   98.59   16.10 
  -6   1  -7  111.39   16.30 
  -6  -1   7   98.99   16.30 
   6  -1  -7  129.19   19.50 
   6  -1  -7  148.99   20.60 
  -6   1  -7  109.19   14.30 
   6   1   7  125.19   18.80 
   6   1   7   86.49   17.00 
   6   1  -8   44.70   13.80 
   6  -1   8   63.79   16.30 
  -6   1   8   61.09   13.10 
   6   1  -8   56.29   12.90 
   6  -1   8   69.99   15.30 
  -6  -1  -8   62.89   12.10 
  -6   1   8   29.70   12.80 
  -6  -1  -8   95.29   14.20 
   6  -1   8   46.40   13.50 
  -6   1   8   38.80   12.70 
  -6  -1  -8   61.29   12.20 
   6   1  -8   77.79   17.30 
   6  -1   8   41.00   14.90 
  -6  -1  -8   57.09   11.10 
  -6  -1   8   54.19   13.80 
  -6   1  -8   66.79   10.70 
  -6   1  -8   57.49   13.00 
   6  -1  -8   66.39   13.80 
  -6   1  -8   58.59   12.10 
  -6  -1   8   42.10   12.40 
  -6   1  -8   71.79   11.80 
   6   1   8   47.90   15.10 
   6   1   8   44.60   13.10 
  -6  -1   8   50.39   12.60 
   6  -1  -8   51.19   14.10 
   6  -1  -8   54.89   16.90 
   6   1   8   64.09   15.90 
   6   1   8   79.29   16.40 
  -6   1   9   14.00   10.90 
  -6   1   9   31.90   10.00 
  -6  -1  -9   38.10    9.30 
   6   1  -9   13.00   10.90 
   6   1  -9   27.70    9.70 
   6  -1   9   39.70   10.80 
  -6  -1  -9   51.89   10.50 
  -6   1   9   25.60    9.90 
  -6  -1  -9   50.19    9.60 
   6   1  -9   51.99   13.20 
  -6  -1   9   32.10   11.40 
   6  -1  -9   57.99   13.10 
  -6  -1   9   29.30    9.20 
  -6   1  -9   41.60    9.40 
  -6   1  -9   45.50    7.90 
   6  -1  -9   21.60   10.30 
   6  -1  -9   13.70   11.20 
  -6  -1   9   43.30   10.10 
   6   1   9   58.09   16.30 
  -6  -1   9    9.80   11.10 
  -6   1  -9   35.90    8.20 
   6  -1  -9   21.90    9.90 
   6   1   9   15.00    9.10 
  -6   1  -9   31.10    9.80 
   6  -1  10   11.20    6.90 
   6   1 -10    6.80    5.40 
  -6   1  10    9.80    7.10 
   6   1 -10    5.90    7.20 
  -6   1  10    3.60    5.60 
  -6  -1 -10   24.60    6.70 
  -6  -1 -10   -2.90    5.40 
  -6  -1 -10   15.00    5.70 
   6  -1 -10   14.00    7.30 
  -6  -1  10   16.00    7.70 
   6  -1 -10    3.70    5.80 
  -6   1 -10    8.40    6.10 
   6   1  10   11.80    6.90 
   7  -1   0 2138.59  196.28 
  -7   1   0 2059.19  197.48 
  -7  -1   0 2098.59  197.68 
   7  -1   0 1980.80  198.08 
   7   1   0 1893.21  197.38 
   7   1   0 2032.00  196.18 
  -7  -1  -1 1979.10  198.38 
   7   1  -1 2070.79  198.48 
   7   1  -1 2076.09  200.78 
   7   1  -1 2016.80  198.08 
   7  -1   1 2148.39  198.98 
  -7  -1  -1 2196.88  200.18 
  -7   1   1 2101.39  200.38 
   7  -1   1 1913.61  199.68 
   7  -1  -1 2098.49  198.48 
   7  -1  -1 2007.00  198.28 
  -7   1  -1 2125.19  199.68 
  -7   1  -1 2001.60  198.48 
  -7  -1   1 2092.99  200.28 
   7   1   1 2117.69  198.98 
   7   1   1 1902.91  198.98 
   7  -1  -1 2086.99  201.28 
   7  -1   2  376.06   39.80 
  -7   1   2  367.06   42.80 
  -7  -1  -2  363.96   38.60 
   7   1  -2  374.56   38.40 
   7   1  -2  395.36   43.90 
   7   1   2  369.86   39.80 
   7  -1  -2  368.66   44.20 
   7  -1  -2  372.26   38.70 
  -7  -1   2  353.56   43.20 
  -7   1  -2  366.16   39.10 
   7   1  -3   72.79   12.40 
  -7   1   3   57.39   16.20 
   7  -1   3   80.29   15.20 
  -7  -1  -3   65.39   13.30 
   7   1  -3   83.99   20.60 
   7  -1  -3   82.99   20.30 
   7  -1  -3   82.79   13.50 
  -7  -1   3   61.49   15.70 
  -7   1  -3   68.19   12.80 
   7   1   3   61.39   15.00 
   7   1  -4  207.78   24.20 
   7   1  -4  183.18   32.30 
  -7   1   4  210.48   30.10 
   7  -1   4  191.38   26.40 
  -7  -1  -4  161.78   22.70 
   7  -1  -4  173.38   24.20 
   7  -1  -4  189.98   32.50 
  -7  -1   4  197.08   28.70 
   7   1   4  160.08   25.40 
  -7   1  -4  211.18   24.30 
   7  -1   5  134.59   18.40 
  -7   1   5  140.19   18.60 
   7   1  -5  138.19   18.20 
  -7  -1  -5  126.59   17.50 
  -7  -1  -5  169.98   21.30 
  -7   1   5  166.28   20.90 
   7   1  -5  187.88   32.70 
   7  -1   5  139.19   23.70 
  -7   1   5  148.29   28.20 
   7  -1   5  141.69   20.70 
  -7  -1  -5  155.98   18.20 
  -7  -1  -5  129.29   17.50 
  -7  -1  -5  155.68   18.70 
   7  -1   5  128.69   19.20 
  -7  -1   5  158.38   19.20 
  -7  -1   5  124.29   20.10 
   7  -1  -5  168.88   21.60 
  -7   1  -5  135.99   17.90 
  -7  -1   5  125.59   23.60 
  -7   1  -5  161.98   18.40 
  -7  -1   5  109.99   24.70 
  -7   1  -5  137.19   18.30 
  -7   1  -5  168.38   17.90 
   7   1   5  146.39   21.30 
   7  -1  -5  147.39   29.10 
  -7  -1   5  170.78   27.30 
  -7   1  -5  162.78   17.00 
  -7   1  -5  149.19   20.70 
   7  -1  -5  143.99   18.50 
   7   1   5  111.19   22.20 
   7   1  -6   60.69   15.80 
   7  -1   6   34.20   16.50 
  -7  -1  -6   41.00   13.60 
  -7  -1  -6   39.10   11.50 
  -7  -1  -6   38.30   13.60 
   7  -1   6   42.00   13.20 
   7  -1   6   37.10   12.80 
  -7  -1  -6   26.40   10.30 
  -7  -1  -6   40.30   11.10 
  -7   1   6   50.29   14.70 
   7   1  -6   50.19   11.60 
  -7  -1   6   23.90   14.10 
  -7  -1   6   29.10   10.80 
  -7   1  -6   31.30   10.80 
   7  -1  -6   40.00   15.20 
  -7   1  -6   53.09   12.10 
  -7   1  -6   38.10   10.20 
  -7   1  -6   41.40    9.40 
  -7   1  -6   49.10   10.60 
  -7   1  -6   35.80   14.80 
  -7  -1   6   42.40   14.70 
   7   1   6   45.20   17.10 
   7  -1  -6   38.00   11.50 
  -7   1   7   79.49   15.10 
   7   1  -7   75.39   18.90 
   7  -1   7   68.19   15.10 
   7  -1   7   76.79   17.80 
  -7   1   7   61.29   16.00 
  -7  -1  -7   97.39   14.30 
  -7  -1  -7   71.99   16.70 
  -7  -1  -7   80.49   14.60 
   7   1  -7   63.89   16.40 
   7  -1   7   70.19   16.10 
  -7  -1  -7   87.89   13.60 
   7   1  -7   67.79   14.20 
  -7  -1   7   73.89   17.60 
   7   1   7   61.19   15.30 
  -7  -1   7   93.99   14.20 
   7  -1  -7   73.59   14.80 
  -7   1  -7   59.99   12.40 
  -7   1  -7   92.79   15.10 
  -7   1  -7   87.49   17.10 
  -7   1  -7   85.19   14.20 
   7  -1  -7   88.99   17.30 
  -7   1  -7   84.09   12.10 
   7   1   7   72.39   16.40 
   7   1   7   63.49   18.70 
   7  -1  -7   70.99   17.90 
  -7   1  -7   56.29   13.10 
  -7  -1  -8   62.89   13.20 
   7  -1   8   90.89   15.90 
   7   1  -8   84.19   15.40 
  -7  -1  -8   71.39   14.10 
  -7   1   8   45.50   14.50 
   7  -1   8  101.09   17.60 
   7   1  -8   87.89   17.90 
  -7   1   8   78.09   15.70 
  -7  -1  -8   81.69   13.00 
  -7   1   8   66.39   14.00 
   7   1  -8  107.99   15.00 
   7  -1   8   72.69   14.60 
  -7   1  -8  114.89   15.70 
   7   1   8   76.59   16.40 
   7  -1  -8   82.89   17.90 
   7  -1  -8   85.09   14.90 
   7   1   8   76.09   16.60 
  -7  -1   8   91.69   16.10 
  -7   1  -8  101.89   12.10 
  -7  -1   8   55.79   15.50 
  -7  -1   8   53.19   13.20 
  -7   1  -8   91.39   13.90 
  -7   1  -8  100.19   13.00 
  -7  -1   8   92.19   16.30 
   7  -1  -8   89.49   16.40 
   7   1   8   77.69   14.50 
  -7   1   9   -0.10    8.00 
  -7   1   9    0.30    8.40 
  -7  -1  -9  -10.60    7.60 
   7  -1   9   -3.10    8.60 
   7   1  -9   10.30   11.60 
  -7  -1  -9    0.10    7.30 
   7   1  -9  -11.20    9.70 
   7   1  -9  -11.70    7.80 
   7  -1   9   -4.20    8.50 
  -7   1   9    1.20   10.10 
  -7  -1  -9    0.80    6.60 
   7   1   9   12.30    9.70 
  -7   1  -9   -1.00    6.30 
  -7  -1   9   12.00    9.10 
  -7  -1   9    1.30   10.20 
  -7   1  -9    1.90    7.00 
   7   1   9    2.00    8.10 
   7   1   9    1.00   10.00 
  -7  -1   9    4.60    7.00 
  -7   1  -9    4.30    8.50 
   7  -1  -9    2.10    8.60 
   7  -1  -9    6.80    8.40 
   7  -1  -9   10.20    8.80 
   7  -1  -9   12.60   11.30 
  -7   1  10    7.10    7.90 
   7   1 -10    0.90   10.40 
   7   1 -10   12.90    7.10 
  -7  -1  10   13.70    9.40 
   7  -1 -10   10.30    7.30 
   7  -1 -10    0.20   10.00 
   8  -1   0  942.81   88.09 
  -8  -1   0  800.22   87.19 
  -8   1   0  950.70   90.09 
  -8  -1   0  986.60   90.29 
   8   1   0  964.30   88.09 
   8   1   0  859.51   89.99 
  -8   1   0  788.22   87.49 
   8  -1   0  875.21   90.69 
  -8  -1  -1 1393.96  130.89 
  -8  -1  -1 1344.97  128.49 
   8   1  -1 1285.57  131.49 
  -8   1   1 1327.47  130.79 
   8  -1   1 1215.08  130.09 
   8   1  -1 1301.97  128.59 
   8  -1   1 1365.56  129.19 
   8  -1  -1 1269.67  128.39 
  -8   1  -1 1301.97  130.19 
   8  -1  -1 1366.06  132.49 
  -8   1  -1 1349.66  128.79 
   8   1   1 1317.97  129.19 
   8  -1  -1 1356.46  128.69 
  -8  -1   1 1341.57  131.09 
   8  -1   2  749.03   77.79 
   8   1  -2  739.13   76.49 
  -8  -1  -2  805.12   76.99 
  -8   1   2  798.82   80.29 
   8   1  -2  788.72   81.29 
  -8   1  -2  816.52   77.09 
   8  -1  -2  820.92   82.19 
   8  -1  -2  731.13   76.69 
  -8  -1   2  765.02   79.99 
   8   1   2  757.82   77.79 
   8   1  -3  254.07   29.60 
  -8   1   3  306.77   37.70 
   8   1  -3  293.67   38.00 
   8  -1   3  231.68   32.10 
  -8  -1  -3  269.17   30.50 
   8  -1  -3  239.98   29.80 
  -8  -1   3  291.47   36.40 
   8   1   3  217.78   31.90 
   8  -1  -3  279.17   38.40 
  -8   1  -3  261.57   30.30 
  -8   1   4  197.78   26.30 
  -8   1   4  138.49   25.90 
  -8  -1  -4  183.18   22.20 
  -8  -1  -4  173.08   19.40 
   8  -1   4  160.78   20.40 
   8   1  -4  168.08   22.70 
   8   1  -4  184.58   32.60 
  -8  -1  -4  165.38   19.80 
   8  -1   4  184.38   26.60 
   8  -1   4  186.08   23.40 
  -8   1   4  188.78   20.70 
  -8  -1  -4  169.28   22.20 
  -8   1  -4  180.28   19.50 
  -8   1  -4  165.58   20.00 
   8  -1  -4  189.98   32.00 
   8   1   4  151.38   20.40 
  -8   1  -4  172.28   22.10 
   8   1   4  122.39   24.20 
  -8  -1   4  149.69   20.30 
  -8  -1   4  163.98   27.90 
   8  -1  -4  174.28   23.60 
   8   1   4  199.48   24.30 
  -8  -1   4  158.48   22.40 
  -8  -1   4  144.69   24.40 
  -8  -1  -5   -6.30   12.70 
  -8   1   5    8.50   10.10 
   8   1  -5   13.70   10.30 
  -8   1   5    8.20   16.40 
   8   1  -5   42.50   19.50 
   8  -1   5   25.80   13.80 
  -8  -1  -5    5.90    8.30 
  -8   1   5   22.40   17.40 
  -8  -1  -5   14.00    8.20 
  -8  -1  -5   22.20    8.80 
  -8  -1  -5   -3.70    9.00 
  -8   1   5    3.60   11.30 
   8  -1   5   13.60   15.60 
   8  -1   5    5.80   10.00 
   8  -1   5  -20.30   17.00 
   8  -1  -5   21.60   10.40 
  -8   1  -5    6.00    8.50 
  -8   1  -5   12.80    7.40 
  -8   1  -5  -18.90   11.70 
  -8  -1   5    8.10   10.50 
   8   1   5   16.40   10.60 
  -8  -1   5   13.30   12.40 
   8   1   5    1.70   14.50 
   8   1   5   13.60   14.80 
  -8   1  -5   17.30    7.70 
  -8   1  -5    8.50    8.40 
  -8  -1   5    2.50   15.50 
  -8  -1   5   29.60   19.10 
   8  -1  -5   36.30   21.00 
  -8  -1   5   15.50   17.90 
  -8   1  -5   -2.10    8.80 
  -8  -1  -6   24.40   11.40 
  -8  -1  -6   34.60   10.10 
  -8  -1  -6   29.40   10.10 
  -8   1   6   21.40   11.70 
  -8  -1  -6   45.60   15.20 
   8   1  -6   23.80   16.20 
  -8  -1  -6   45.40   12.00 
  -8   1   6   18.40   14.00 
   8  -1   6  -15.70   19.40 
   8  -1   6   30.40   17.40 
   8   1  -6   35.50   11.20 
   8  -1   6   30.40   12.50 
   8  -1   6   56.49   14.10 
   8  -1  -6   16.50   11.70 
  -8  -1   6    0.10    9.70 
   8   1   6   63.79   18.40 
   8   1   6   25.60   13.40 
  -8   1  -6   51.89    9.80 
  -8   1  -6   19.20   14.10 
  -8   1  -6   33.70   10.80 
  -8  -1   6   29.00   14.50 
   8  -1  -6   38.50   15.50 
  -8   1  -6   31.00   10.60 
  -8   1  -6   52.09   11.50 
   8   1   6    2.70   20.40 
  -8  -1   6  -15.80   13.30 
  -8   1  -6   21.70    8.70 
   8  -1   7   29.40   15.90 
  -8  -1  -7    6.40    9.50 
   8   1  -7    4.40   14.30 
   8  -1   7    6.70   13.40 
   8   1  -7   15.40   11.20 
   8  -1   7   -0.20   12.20 
  -8  -1  -7    8.40    9.20 
  -8   1   7   11.10   11.40 
  -8  -1  -7    2.40   11.20 
  -8   1   7  -12.50   13.90 
  -8  -1  -7   29.50   14.00 
  -8   1  -7    9.30   13.40 
  -8   1  -7   17.20    9.10 
  -8   1  -7   16.50    9.70 
  -8   1  -7    8.60   12.10 
  -8   1  -7   23.20   10.00 
  -8  -1   7   21.30   15.80 
  -8  -1   7    0.60    9.30 
   8   1   7   13.50   13.60 
  -8  -1   7  -15.30   13.40 
   8   1   7  -11.30   15.40 
   8  -1  -7    7.20   14.60 
   8  -1  -7   10.70   15.80 
  -8   1  -7    8.90   10.00 
   8  -1  -7    8.20   11.80 
   8   1  -8    0.50    9.80 
  -8  -1  -8    6.80    8.30 
   8   1  -8    6.70   11.60 
  -8   1   8   11.30    9.90 
  -8  -1  -8   -1.10    9.70 
   8  -1   8    4.20    9.70 
  -8   1   8   -7.60   12.20 
  -8  -1  -8    4.50    8.70 
   8   1  -8    1.10   14.10 
   8  -1   8    4.30   12.80 
   8  -1   8   13.10   12.50 
   8   1   8   -2.70   12.40 
  -8   1  -8   -2.80   10.00 
  -8  -1   8    2.00   11.30 
  -8  -1   8   -5.30    8.20 
   8  -1  -8  -18.90   10.00 
  -8  -1   8   -8.10   12.30 
  -8   1  -8    6.60    9.00 
   8  -1  -8    4.80   12.70 
   8  -1  -8   -9.00   13.20 
   8   1   8   12.30   11.00 
  -8   1  -8   14.50    8.40 
   8   1   8    4.80   13.40 
   8   1  -9   28.50   10.70 
  -8  -1  -9   24.00    8.00 
  -8   1   9   26.70   10.10 
   8  -1   9   15.10    8.50 
  -8  -1  -9   27.30    8.40 
  -8  -1  -9   24.60    7.00 
   8  -1   9   33.10    9.70 
  -8   1   9   24.30    8.00 
  -8   1   9   26.70    9.70 
   8   1  -9   23.30    9.50 
   8   1  -9   26.40    8.60 
  -8  -1   9   43.70   10.40 
   8   1   9   29.70    9.70 
  -8  -1   9   33.60    9.80 
   8  -1  -9   34.80    9.10 
   8  -1  -9   32.10   11.00 
   8   1   9   32.90    9.80 
  -8   1  -9   33.90    7.50 
  -8  -1   9   28.20    6.80 
  -8   1  -9   33.10    8.80 
  -8   1  -9   25.50    8.00 
   8   1   9   27.30    9.60 
   8  -1  -9   23.50    8.90 
   9   1   0 1487.55  142.69 
  -9   1   0 1414.26  141.99 
  -9  -1   0 1548.95  144.99 
   9  -1   0 1455.25  145.09 
  -9  -1   0 1376.96  143.59 
   9  -1   0 1516.55  142.79 
   9   1   0 1433.56  144.59 
  -9   1   0 1468.75  144.39 
  -9  -1  -1  427.96   42.80 
   9  -1   1  403.46   43.50 
  -9  -1  -1  387.56   46.50 
   9   1  -1  404.26   47.40 
   9   1  -1  381.66   42.50 
  -9   1   1  434.26   47.10 
  -9  -1   1  411.66   47.20 
   9  -1  -1  407.56   48.70 
  -9   1  -1  389.26   45.70 
   9   1   1  420.46   43.70 
   9  -1  -1  441.86   42.80 
  -9   1  -1  414.66   43.10 
   9  -1   2  237.18   29.00 
  -9  -1  -2  224.38   27.60 
   9   1  -2  224.28   26.70 
   9   1  -2  230.68   34.90 
  -9   1   2  241.78   33.90 
   9  -1  -2  217.68   26.60 
   9   1   2  227.58   28.60 
   9  -1  -2  254.17   36.50 
  -9   1  -2  237.18   27.90 
  -9  -1   2  242.48   32.90 
   9  -1   3  147.19   23.00 
  -9   1   3  156.18   25.30 
   9   1  -3  171.28   29.30 
  -9  -1  -3  161.28   20.80 
   9  -1  -3  152.78   29.60 
  -9   1  -3  128.79   19.30 
  -9  -1   3  107.99   23.10 
   9   1   3  115.59   21.90 
  -9  -1  -4   40.10   20.30 
  -9   1   4  105.49   22.00 
   9   1  -4   89.59   24.10 
  -9  -1  -4   80.39   13.50 
   9  -1   4   86.19   17.30 
   9  -1   4   60.69   19.40 
  -9   1   4   83.29   20.00 
  -9  -1  -4   86.19   12.50 
  -9  -1  -4  100.49   15.50 
  -9   1   4   77.39   13.60 
   9   1  -4   48.50   17.40 
  -9  -1  -4   88.59   13.30 
   9   1  -4   78.59   13.80 
   9  -1   4   82.79   13.40 
  -9  -1  -4  108.39   17.70 
  -9  -1  -4   82.59   12.60 
  -9   1   4   78.19   16.00 
   9   1   4   82.09   19.70 
  -9  -1   4   81.89   17.40 
   9   1   4   80.39   14.10 
  -9   1  -4   75.39   12.00 
   9  -1  -4  123.79   27.70 
  -9  -1   4   79.89   20.60 
  -9   1  -4  105.09   17.10 
  -9   1  -4   99.99   13.70 
   9  -1  -4   87.09   17.70 
   9  -1  -4   82.99   13.80 
  -9  -1   4   85.49   16.80 
  -9   1  -4   91.69   13.10 
   9   1   4   71.19   17.60 
  -9   1  -4   70.29   13.00 
  -9  -1   4   88.39   13.80 
  -9  -1   4   48.40   18.30 
  -9   1   5   38.20   14.70 
   9  -1   5   43.80   12.80 
   9   1  -5   44.80   12.70 
  -9  -1  -5   65.69   11.60 
  -9   1   5   59.19   20.40 
  -9  -1  -5   52.59   11.90 
   9  -1   5   57.99   17.10 
  -9   1   5   52.39   13.20 
  -9  -1  -5   34.50   10.20 
   9  -1   5   36.50   20.30 
  -9  -1  -5   55.59   11.50 
  -9  -1  -5   78.79   16.80 
  -9   1  -5   57.69   12.10 
  -9  -1   5   47.20   23.00 
   9  -1  -5   41.80   12.80 
  -9  -1   5   71.29   16.60 
   9   1   5   78.59   13.80 
  -9   1  -5   54.69   11.90 
  -9   1  -5   58.79   11.90 
  -9  -1   5   41.50   19.70 
   9   1   5   59.69   17.50 
   9  -1  -5   45.10   14.80 
  -9   1  -5   58.69   10.90 
  -9   1  -5   73.79   16.60 
  -9  -1   5   59.19   13.20 
  -9   1   6   43.20   15.80 
   9  -1   6   47.40   17.70 
   9  -1   6   34.20   14.80 
  -9  -1  -6   66.29   16.80 
   9   1  -6   29.80   16.30 
   9   1  -6   52.89   12.60 
  -9  -1  -6   42.80   11.70 
  -9   1   6   28.70   12.60 
   9  -1   6   40.20   21.00 
  -9  -1  -6   44.20   10.90 
  -9  -1  -6   38.40   10.80 
  -9  -1  -6   36.30   12.10 
  -9   1  -6   37.10   12.40 
  -9  -1   6   48.50   16.00 
   9   1   6   68.09   22.70 
  -9   1  -6   50.59   16.90 
   9  -1  -6   43.00   13.10 
  -9  -1   6   39.40   15.00 
  -9   1  -6   47.40   12.00 
  -9  -1   6   13.00   10.30 
   9   1   6   41.80   14.30 
   9   1   6   36.90   18.00 
  -9   1  -6   42.20   11.40 
  -9   1  -6   46.30   10.50 
   9  -1  -6   52.49   17.80 
   9  -1   7   21.60   11.70 
   9   1  -7   -3.80   10.30 
  -9  -1  -7   12.90   10.00 
  -9  -1  -7    5.00   14.00 
  -9   1   7   12.70   18.10 
  -9   1   7   -3.60    9.80 
   9  -1   7    0.80   13.60 
  -9   1   7  -46.30   13.10 
  -9  -1  -7   -0.20    9.40 
  -9  -1  -7  -11.60   10.60 
   9   1  -7  -11.20   14.50 
   9  -1   7    1.30   15.60 
  -9  -1   7    2.40   11.20 
  -9  -1   7   -8.30   14.00 
   9  -1  -7   31.70   15.70 
  -9  -1   7  -20.60   14.20 
  -9   1  -7   -0.50    9.50 
  -9   1  -7   -0.20   10.90 
  -9   1  -7    6.50    8.60 
   9  -1  -7   -7.30   15.60 
  -9   1  -7    6.00    9.30 
  -9   1  -7   10.70   13.70 
   9   1   7   19.00   17.00 
   9  -1  -7   -7.30   11.40 
   9   1   7  -10.80   13.40 
  -9  -1   7    0.50    8.80 
   9   1  -8   19.90   14.30 
  -9   1   8   17.80   10.30 
   9  -1   8   13.10   10.50 
  -9   1   8   11.30    9.00 
  -9   1   8   15.10   12.50 
   9   1  -8   35.40   12.30 
  -9  -1  -8   20.90   10.10 
  -9  -1  -8    4.40    7.70 
   9  -1   8    5.20   12.90 
  -9  -1  -8   23.90    8.20 
   9  -1   8   16.50   10.60 
   9   1  -8    7.00    9.60 
  -9   1  -8    8.10    8.90 
  -9   1  -8   10.70   10.20 
  -9  -1   8    3.20    7.50 
   9  -1  -8   18.20   14.00 
  -9  -1   8   14.70   11.00 
  -9  -1   8    9.40   12.80 
   9   1   8    8.80   13.10 
   9  -1  -8   26.60   10.60 
  -9   1  -8   10.40    7.60 
   9   1   8   19.10   12.40 
   9  -1  -8   22.30   11.90 
   9  -1   9    0.10    7.30 
   9   1  -9    4.40    6.50 
   9   1  -9   19.30    9.00 
  -9  -1  -9    1.60    5.20 
   9  -1   9    3.60    8.40 
  -9  -1  -9   -1.40    6.40 
  -9   1   9   10.90    6.00 
  -9   1   9   12.00    8.30 
  -9  -1  -9   -0.40    5.50 
  -9   1   9    5.60    8.30 
   9   1  -9  -15.50    7.30 
   9   1   9    5.40    8.30 
   9  -1  -9   15.80    9.40 
   9  -1  -9   -4.00    7.00 
  -9   1  -9    1.50    6.30 
  -9   1  -9    0.40    6.50 
  -9  -1   9    5.10    8.20 
   9   1   9   11.20    8.10 
   9  -1  -9    1.00    7.40 
  -9  -1   9    3.30    8.30 
  10   1   0  586.84   54.69 
 -10  -1   0  541.85   58.09 
  10  -1   0  541.55   54.59 
 -10   1   0  529.45   57.19 
  10  -1   0  449.06   57.99 
  10   1  -1   70.19   13.40 
 -10  -1  -1   52.49   15.60 
 -10  -1  -1   56.29   12.80 
  10  -1   1   81.19   15.10 
  10   1  -1   82.09   20.60 
 -10   1   1   62.49   15.70 
 -10   1  -1   58.09   15.30 
  10  -1  -1   60.59   20.70 
  10  -1  -1   88.59   14.00 
 -10  -1   1   53.19   15.60 
  10   1   1   67.29   14.80 
 -10   1  -1   53.99   12.80 
  10   1  -2  498.25   52.79 
 -10  -1  -2  520.25   53.29 
  10   1  -2  523.95   59.49 
  10  -1   2  528.05   54.69 
 -10   1   2  512.75   57.99 
 -10   1  -2  529.55   53.79 
  10   1   2  510.55   54.69 
  10  -1  -2  514.25   60.59 
 -10  -1   2  485.05   57.29 
  10  -1  -2  511.25   52.89 
  10   1  -3   78.79   15.20 
 -10  -1  -3   84.89   11.90 
 -10   1   3   58.29   17.70 
 -10  -1  -3   69.59   14.10 
 -10  -1  -3   74.79   15.60 
  10  -1   3   64.49   17.60 
  10  -1   3   84.09   13.10 
 -10  -1  -3   61.99   11.30 
 -10   1   3   72.49   12.20 
 -10  -1  -3   59.09   11.50 
 -10  -1  -3   43.20   18.70 
  10  -1   3   61.39   14.70 
 -10   1   3   60.89   14.10 
  10   1  -3   79.99   14.90 
 -10   1   3   62.19   17.80 
  10   1  -3  113.59   25.90 
 -10  -1  -3   60.09   11.10 
 -10  -1   3   61.19   15.50 
  10   1   3   52.29   14.80 
 -10   1  -3   63.79   11.60 
 -10   1  -3   80.29   15.90 
 -10  -1   3   78.99   15.80 
 -10  -1   3   57.89   17.50 
  10  -1  -3   48.40   12.90 
  10   1   3   41.00   12.10 
 -10   1  -3   35.70   19.10 
  10   1   3   74.29   17.90 
 -10   1  -3   82.49   11.80 
  10  -1  -3   99.19   15.20 
 -10   1  -3   50.49   10.80 
 -10   1  -3   66.39   11.50 
  10  -1  -3   79.69   25.20 
 -10  -1   3   79.59   12.00 
 -10  -1   3   68.79   18.00 
 -10  -1  -4  131.29   28.20 
 -10   1   4  197.28   23.00 
 -10  -1  -4  194.08   23.40 
 -10  -1  -4  199.58   25.70 
  10   1  -4  294.07   38.70 
 -10   1   4  253.77   29.60 
  10  -1   4  162.38   28.90 
  10  -1   4  199.58   28.00 
  10  -1   4  202.98   23.10 
 -10   1   4  182.58   30.30 
  10   1  -4  148.99   25.50 
 -10  -1  -4  196.18   22.60 
  10   1  -4  217.58   23.10 
 -10  -1  -4  206.88   22.10 
  10  -1   4  197.68   25.60 
 -10  -1  -4  183.08   22.60 
 -10   1   4  162.28   25.00 
 -10   1  -4  188.38   22.60 
 -10  -1   4  219.18   23.40 
  10  -1  -4  169.98   22.60 
  10   1   4  180.38   25.00 
 -10  -1   4  178.88   25.50 
 -10   1  -4  212.18   26.60 
 -10  -1   4  249.78   29.70 
 -10  -1   4  145.59   27.70 
 -10   1  -4  149.59   30.30 
 -10   1  -4  173.28   22.20 
  10   1   4  200.58   23.50 
  10   1   4  163.38   28.70 
 -10   1  -4  178.88   22.20 
  10  -1  -4  157.38   25.00 
 -10   1  -4  186.58   22.50 
  10  -1  -4  221.58   38.80 
 -10  -1   4  185.38   25.50 
  10  -1   5  107.19   24.00 
 -10  -1  -5  106.29   18.20 
 -10  -1  -5   89.99   14.40 
 -10   1   5   91.39   23.60 
 -10  -1  -5   89.19   13.60 
  10  -1   5   83.09   16.30 
 -10   1   5  105.69   16.80 
  10  -1   5   83.49   20.00 
 -10  -1  -5   73.69   14.50 
 -10   1   5   62.19   18.70 
  10   1  -5   95.49   15.70 
 -10  -1  -5  122.09   15.40 
 -10  -1   5   76.19   16.10 
 -10  -1   5  119.19   29.50 
 -10   1  -5   85.19   18.10 
 -10  -1   5   81.99   18.30 
  10   1   5  120.79   20.80 
 -10   1  -5   79.19   13.40 
  10   1   5   90.89   16.80 
 -10  -1   5   81.19   22.20 
  10  -1  -5  108.69   16.20 
 -10  -1   5   69.09   18.50 
  10  -1  -5   86.19   17.70 
 -10   1  -5   86.89   15.00 
 -10   1  -5  100.19   15.20 
 -10   1  -5   78.79   15.00 
 -10  -1  -6  114.89   15.70 
 -10   1   6  112.59   17.70 
 -10   1   6   94.89   20.30 
  10  -1   6  144.49   22.40 
 -10  -1  -6  119.19   20.60 
  10  -1   6   87.89   24.00 
  10   1  -6   92.09   21.20 
  10  -1   6  152.88   19.50 
 -10   1   6   91.29   19.40 
 -10  -1  -6   97.69   15.90 
  10   1  -6   87.39   16.10 
 -10  -1  -6  107.79   15.80 
 -10  -1  -6   79.39   16.50 
 -10  -1   6  106.99   16.50 
 -10  -1   6  122.39   21.00 
 -10   1  -6  102.99   15.30 
  10   1   6  123.89   22.50 
  10   1   6  151.68   19.30 
 -10  -1   6   96.99   15.20 
 -10   1  -6   91.49   19.70 
  10  -1  -6  111.29   17.60 
 -10   1  -6  102.59   16.50 
  10  -1  -6   93.29   20.40 
 -10  -1   6  100.59   20.40 
  10   1   6  106.39   25.60 
 -10   1  -6  135.79   17.80 
 -10   1  -6  106.29   16.10 
  10   1  -7   93.39   19.10 
 -10  -1  -7  136.19   17.40 
 -10   1   7   90.89   16.00 
 -10   1   7  132.59   17.30 
  10   1  -7  108.19   16.50 
 -10  -1  -7  103.39   15.70 
  10  -1   7  105.19   18.70 
 -10   1   7  144.69   20.90 
  10  -1   7  165.38   22.30 
 -10   1   7  165.18   21.80 
 -10  -1  -7  120.59   15.80 
 -10  -1  -7  138.59   20.80 
 -10  -1   7   87.99   15.00 
 -10  -1   7   93.99   19.90 
 -10   1  -7  112.29   15.40 
 -10  -1   7  110.79   20.10 
 -10   1  -7  114.69   16.30 
 -10   1  -7  103.09   16.50 
 -10   1  -7  164.08   18.30 
  10  -1  -7   94.79   19.30 
 -10  -1   7   90.39   17.10 
  10  -1  -7  106.09   17.30 
  10   1   7  140.59   21.60 
 -10   1  -7  117.89   19.60 
  10  -1  -7   95.69   20.10 
  10   1   7  140.09   19.20 
  10  -1   8   12.50   10.90 
  10   1  -8    9.60   12.90 
 -10  -1  -8   18.50    7.20 
 -10   1   8    5.70    9.30 
 -10   1   8   12.70   11.70 
  10  -1   8    7.20    9.00 
  10  -1   8  -12.30   11.90 
  10   1  -8    7.90    8.60 
  10   1  -8   -0.90   10.70 
 -10   1   8    4.60    7.60 
 -10  -1  -8   -5.20    8.40 
 -10  -1  -8   10.20    8.10 
  10   1   8   -7.40   11.00 
 -10  -1   8   -1.60   11.20 
  10  -1  -8    3.50    9.20 
 -10   1  -8    5.60    8.50 
 -10  -1   8   19.20    9.80 
 -10   1  -8   -0.10    7.20 
  10   1   8    1.90   12.20 
  10  -1  -8   11.00   11.30 
 -10   1  -8    7.70    9.90 
 -10  -1   8    9.40    8.90 
  10  -1  -8    9.40   12.40 
  10  -1   9    2.50    9.00 
 -10   1   9   25.50    8.50 
  10   1  -9   10.10    8.20 
 -10   1   9    7.30    7.40 
  10   1  -9   18.20    6.10 
 -10  -1  -9   16.00    6.10 
 -10  -1  -9    1.70    5.00 
 -10   1  -9    8.20    6.20 
  10   1   9   16.60    8.00 
 -10   1  -9    9.30    5.50 
 -10  -1   9    6.40    7.40 
 -10  -1   9   25.10    8.70 
  10  -1  -9    2.10    8.30 
  10  -1  -9   12.40    6.40 
 -11  -1   0   -3.60   12.40 
 -11   1   0   12.50    9.30 
 -11   1   0   11.70   12.70 
 -11  -1   0  -10.20   16.50 
  11   1   0    6.80   10.60 
 -11  -1   0    5.90    9.40 
 -11  -1   0   -5.00   11.80 
  11  -1   0   24.50   11.40 
 -11  -1   0   -1.30   10.10 
 -11   1   0   -7.00    7.90 
 -11   1   0   18.30   13.60 
 -11   1   0   11.10   18.10 
 -11   1   0    4.60    9.90 
 -11  -1   0   14.80    9.90 
 -11   1   1   85.99   24.80 
 -11   1   1  128.69   21.50 
 -11  -1  -1  118.79   17.40 
  11  -1   1   88.59   22.20 
 -11  -1  -1  130.09   18.60 
  11  -1   1  157.78   17.80 
 -11  -1  -1  155.28   17.20 
 -11  -1  -1  109.59   23.10 
  11  -1   1  148.09   21.10 
 -11   1   1  153.28   18.60 
 -11   1   1  149.79   19.10 
 -11   1   1  164.48   18.30 
 -11  -1  -1  145.09   23.30 
 -11   1   1  134.89   22.70 
 -11  -1  -1  110.99   17.00 
 -11   1   1  138.89   17.60 
  11   1  -1  153.38   20.80 
 -11  -1   1  153.18   17.60 
 -11   1  -1  125.99   23.20 
 -11   1  -1  157.88   17.70 
  11  -1  -1  150.68   20.90 
  11   1   1  133.69   20.90 
 -11  -1   1  104.79   22.10 
  11  -1  -1  151.58   20.70 
 -11  -1   1  149.99   19.00 
 -11  -1   1  114.39   21.80 
 -11  -1   1  128.29   17.00 
 -11  -1   1  139.19   18.30 
 -11   1  -1  118.79   18.80 
  11  -1  -1  118.29   26.80 
 -11  -1   1  106.19   23.60 
 -11   1  -1  136.29   17.80 
 -11   1  -1  156.48   17.90 
 -11  -1  -2  305.07   30.10 
  11   1  -2  258.67   38.40 
  11  -1   2  209.08   26.50 
  11   1  -2  265.57   26.90 
 -11  -1  -2  202.28   26.90 
 -11   1   2  267.87   36.20 
  11   1  -2  235.58   28.10 
 -11  -1  -2  208.38   25.80 
 -11   1   2  223.48   27.80 
 -11  -1  -2  238.38   26.70 
 -11  -1  -2  219.38   25.90 
 -11   1   2  226.28   26.30 
 -11   1   2  249.68   28.10 
 -11   1   2  230.98   30.90 
 -11  -1  -2  240.18   25.20 
  11  -1   2  218.38   30.40 
  11  -1   2  238.08   30.70 
 -11  -1  -2  232.68   35.40 
 -11  -1   2  240.28   35.50 
 -11  -1   2  133.59   34.80 
 -11   1  -2  240.58   32.60 
 -11   1  -2  235.48   26.50 
 -11   1  -2  213.48   25.70 
 -11  -1   2  241.78   28.10 
  11  -1  -2  225.38   28.30 
 -11  -1   2  232.68   29.70 
  11  -1  -2  250.27   38.90 
  11   1   2  184.98   25.50 
  11  -1  -2  180.68   27.60 
 -11   1  -2  217.08   25.80 
  11  -1  -2  239.68   27.00 
  11   1   2  253.67   30.70 
 -11  -1   2  235.78   28.30 
 -11  -1   2  235.98   26.50 
 -11   1  -2  237.38   29.20 
 -11   1  -2  231.28   25.40 
  11  -1   3  310.57   36.60 
  11   1  -3  274.27   32.50 
 -11  -1  -3  244.28   38.30 
 -11   1   3  311.27   37.50 
 -11  -1  -3  257.97   30.00 
 -11  -1  -3  303.97   29.90 
  11   1  -3  299.57   43.70 
 -11  -1  -3  303.27   30.90 
  11  -1   3  270.77   30.90 
  11   1  -3  266.87   31.30 
 -11  -1  -3  294.37   33.60 
 -11   1   3  282.87   30.90 
 -11   1   3  261.87   32.50 
  11  -1   3  215.18   34.50 
  11  -1   3  252.67   32.20 
 -11   1   3  275.27   40.40 
 -11  -1  -3  286.37   30.80 
 -11   1  -3  293.07   33.70 
 -11  -1   3  261.27   40.20 
  11  -1  -3  285.47   32.60 
  11   1   3  258.87   30.80 
  11  -1  -3  250.17   31.40 
 -11   1  -3  244.58   37.00 
 -11  -1   3  275.77   33.90 
 -11   1  -3  250.77   29.80 
 -11   1  -3  264.27   30.70 
 -11  -1   3  295.07   36.90 
 -11  -1   3  308.57   33.30 
 -11   1  -3  318.57   30.20 
 -11  -1   3  308.67   30.40 
 -11   1  -3  252.27   30.70 
  11   1   3  230.68   31.20 
  11   1   3  245.38   35.60 
  11  -1  -3  304.87   44.30 
  11  -1   4   -4.40   11.70 
 -11   1   4   54.99   19.40 
  11   1  -4   -7.60   14.00 
 -11   1   4  -24.40   13.50 
 -11   1   4   -3.20    9.80 
 -11  -1  -4    1.50    9.00 
  11  -1   4    9.90   19.20 
 -11  -1  -4   -7.00   20.10 
 -11  -1  -4    9.90    9.20 
  11  -1   4   -6.90   14.10 
 -11  -1  -4    7.60   10.20 
 -11  -1  -4   16.50   13.70 
 -11  -1  -4   -5.70    9.40 
  11   1  -4   -7.70   10.60 
  11  -1  -4   11.80   11.30 
  11   1   4   14.30   11.80 
 -11   1  -4   -1.40    9.80 
 -11   1  -4  -16.60   23.20 
 -11   1  -4   -3.40    9.20 
 -11   1  -4   -1.60   14.10 
 -11  -1   4    4.50   14.90 
  11   1   4   12.30   14.30 
 -11   1  -4    9.70    9.90 
  11  -1  -4    4.50   14.90 
 -11   1  -4    2.10    8.80 
 -11  -1   4   24.30   17.90 
 -11  -1   4  -14.00   13.70 
 -11  -1   4   14.70   11.00 
 -11  -1  -5   11.70   14.60 
 -11  -1  -5   15.10   11.80 
  11   1  -5    9.40   12.00 
  11   1  -5   -4.60   14.70 
 -11  -1  -5   11.90    9.20 
  11  -1   5    1.40   13.50 
 -11  -1  -5   16.90   10.60 
 -11   1   5   16.00   11.60 
 -11   1   5   32.30   20.10 
  11  -1   5    0.20   15.80 
 -11  -1  -5   -0.60    9.90 
 -11   1   5   12.70   15.60 
  11  -1   5   21.30   21.90 
 -11  -1   5   18.60   15.60 
  11  -1  -5    1.40   12.30 
  11   1   5   28.70   17.10 
 -11   1  -5   20.00   11.80 
 -11   1  -5   11.50    9.60 
  11   1   5   72.49   23.60 
  11  -1  -5    5.80   14.10 
 -11  -1   5    1.30   12.10 
 -11  -1   5    8.60   15.20 
 -11   1  -5    7.90    9.90 
  11   1   5    9.90   12.90 
 -11  -1   5   32.90   20.60 
 -11   1  -5   21.80   10.80 
 -11   1  -5   13.70   14.70 
 -11  -1  -6  356.66   38.50 
 -11   1   6  331.17   37.20 
  11  -1   6  328.17   40.50 
 -11   1   6  384.06   38.30 
 -11  -1  -6  301.17   34.00 
 -11  -1  -6  321.77   34.80 
 -11   1   6  329.27   35.20 
 -11  -1  -6  289.27   33.40 
  11   1  -6  306.77   34.60 
  11   1  -6  340.77   38.50 
  11  -1   6  311.67   35.30 
 -11  -1  -6  305.07   33.90 
  11  -1   6  304.97   37.70 
 -11   1   6  301.47   37.40 
  11   1   6  359.66   41.30 
 -11  -1   6  338.87   34.30 
 -11   1  -6  295.87   34.20 
  11  -1  -6  316.47   35.60 
 -11  -1   6  327.57   38.00 
 -11   1  -6  261.37   33.30 
  11  -1  -6  267.77   36.30 
 -11   1  -6  357.76   37.90 
 -11   1  -6  287.67   34.60 
 -11   1  -6  284.17   33.50 
 -11  -1   6  230.38   32.30 
  11   1   6  318.27   37.90 
  11   1   6  341.77   35.80 
  11   1  -7   38.10   10.80 
 -11  -1  -7   21.40    9.00 
 -11   1   7   36.10   14.20 
 -11  -1  -7   41.90   11.80 
  11  -1   7   24.80   13.40 
 -11   1   7   25.20    9.30 
  11   1  -7   18.00   13.50 
  11  -1   7   36.80   19.00 
 -11   1   7   21.10   15.00 
  11  -1   7   20.60   15.00 
 -11   1   7   42.50   11.00 
 -11  -1  -7   57.39   16.90 
 -11  -1  -7   18.70    9.50 
 -11  -1   7   42.90   14.90 
 -11  -1   7   26.60    8.00 
 -11  -1   7   22.70   10.90 
  11  -1  -7   43.00   11.50 
 -11  -1   7   26.40   14.30 
 -11   1  -7   30.70   11.00 
  11   1   7   43.80   18.50 
 -11   1  -7   26.70   10.40 
  11  -1  -7   24.10   14.20 
  11   1   7   31.90   13.30 
  11   1   7   51.19   15.90 
 -11   1  -7   30.80    9.60 
  11  -1  -7   59.39   15.10 
 -11   1  -7   55.39   18.80 
 -11   1  -7   33.50    9.90 
 -11   1   8   11.90    8.30 
  11  -1   8  -14.50    9.10 
 -11  -1  -8    3.80    7.10 
  11  -1   8   13.70   10.60 
  11   1  -8   -2.90   11.00 
 -11  -1  -8    9.10    6.60 
  11   1  -8  -10.00    7.10 
  11   1  -8   10.30    9.70 
 -11  -1  -8   -5.70    7.50 
 -11   1   8    1.40    5.90 
 -11   1   8   -8.40   11.10 
 -11   1  -8    3.20    8.00 
 -11  -1   8    1.80   11.30 
 -11   1  -8    5.80    7.00 
  11   1   8    5.30    9.60 
  11  -1  -8   -6.40    8.10 
  11  -1  -8   19.20   10.60 
  11   1   8   20.30   11.00 
 -11  -1   8   -8.60    8.10 
  11  -1  -8   15.50    9.90 
 -12  -1   0   28.40   10.60 
 -12   1   0   13.70   10.10 
 -12   1   0    4.20    9.20 
 -12  -1   0   14.80    9.00 
  12   1   0  -15.30   16.20 
 -12   1   0    5.20   13.50 
  12  -1   0   -5.80   15.30 
  12   1   0   -5.70    9.80 
 -12   1   0   33.80   16.90 
 -12   1   0    4.60   20.80 
 -12   1   0    2.40   10.60 
 -12  -1   0    3.60   15.90 
 -12  -1   0   11.50   14.00 
 -12  -1   0    9.80    9.20 
 -12  -1   0   20.00   18.00 
  12  -1   0   -1.60    9.70 
  12   1   0   33.30   12.60 
 -12   1   0   18.80   11.60 
  12  -1   0   33.10   12.70 
 -12   1   0   13.60    9.30 
 -12  -1   0   -1.60    9.90 
 -12  -1   0    8.00   11.00 
 -12  -1  -1  139.49   19.30 
 -12   1   1  119.79   18.40 
  12  -1   1  113.99   17.70 
  12  -1   1  131.89   21.50 
 -12  -1  -1   75.69   24.10 
 -12   1   1  126.19   22.30 
  12   1  -1  153.88   18.00 
 -12   1   1  109.29   26.50 
 -12  -1  -1  153.08   18.70 
 -12  -1  -1  125.09   17.60 
 -12   1   1  123.19   17.70 
 -12  -1  -1  141.79   25.60 
 -12  -1  -1  151.68   17.20 
 -12  -1  -1  138.29   22.60 
 -12   1   1  130.09   23.30 
 -12   1   1  122.89   18.90 
 -12   1   1  121.09   17.50 
  12   1  -1  150.58   21.00 
  12  -1   1  121.19   23.30 
 -12   1  -1  148.29   18.60 
 -12  -1   1  145.39   17.50 
 -12  -1   1  140.49   18.80 
 -12  -1   1  122.49   16.80 
  12  -1  -1  147.99   20.60 
 -12  -1   1  147.59   20.30 
  12   1   1  137.69   21.20 
 -12   1  -1  112.19   25.20 
 -12   1  -1  149.39   17.70 
 -12   1  -1  176.48   24.50 
  12   1   1  134.99   17.90 
 -12  -1   1  110.19   22.40 
  12   1   1   90.79   22.70 
 -12  -1   1  122.69   23.60 
 -12   1  -1  143.99   17.60 
 -12   1  -1  143.99   17.70 
 -12  -1   1  113.99   26.10 
  12  -1  -1  125.29   17.50 
  12   1  -2   97.79   21.40 
 -12   1   2  138.09   18.30 
 -12   1   2  133.29   25.20 
  12  -1   2  134.49   23.00 
 -12  -1  -2  146.49   26.00 
  12   1  -2  168.18   22.00 
  12  -1   2  123.09   25.20 
 -12   1   2  122.29   19.40 
 -12   1   2  143.09   24.90 
 -12  -1  -2  129.19   18.30 
 -12  -1  -2  125.19   19.00 
  12   1  -2  162.98   19.00 
 -12  -1  -2  148.09   21.50 
  12  -1   2  147.39   19.30 
 -12   1   2  136.39   20.70 
 -12  -1  -2  160.28   18.40 
 -12  -1   2  141.89   25.20 
 -12   1  -2  140.29   18.10 
 -12  -1   2  181.38   21.10 
 -12  -1   2  135.39   25.10 
 -12   1  -2  114.59   18.20 
 -12   1  -2  134.59   18.70 
 -12   1  -2  134.19   28.00 
  12  -1  -2  167.38   33.90 
  12  -1  -2  154.48   18.80 
 -12  -1   2  145.09   18.60 
  12   1   2  101.99   18.50 
  12  -1  -2  116.79   21.40 
  12   1   2  161.08   24.20 
 -12  -1   2  127.29   20.80 
  12  -1  -2  182.58   22.70 
 -12   1  -2  154.28   22.10 
 -12  -1  -3   19.40   20.60 
  12   1  -3   14.90   11.10 
  12  -1   3   18.90   12.00 
 -12  -1  -3    5.70   10.50 
 -12   1   3    3.50   10.60 
 -12   1   3   30.80   18.80 
  12  -1   3   10.30   13.00 
 -12  -1  -3    5.70   14.20 
  12  -1   3   33.40   20.20 
 -12  -1  -3   -9.20    8.70 
 -12  -1  -3   -1.70    9.50 
 -12   1   3   18.60   14.10 
 -12  -1  -3    1.10   10.10 
 -12  -1   3  -15.40   14.60 
  12  -1  -3   -6.80   10.40 
 -12   1  -3   48.70   23.50 
 -12   1  -3    2.70    9.70 
  12   1   3    6.40   12.00 
 -12  -1   3   12.70   15.30 
 -12   1  -3   12.60   10.60 
 -12   1  -3   -4.80   13.90 
 -12  -1   3   30.60   12.90 
 -12  -1   3    7.50   11.20 
  12   1   3    1.20   12.50 
 -12   1  -3  -11.30    9.00 
 -12  -1   3   28.40   19.40 
 -12   1  -3   -2.90    9.60 
 -12  -1  -4   59.69   12.00 
  12  -1   4   62.49   15.80 
  12  -1   4  114.79   23.70 
  12   1  -4   53.99   13.60 
 -12  -1  -4   34.20   16.20 
 -12   1   4   46.40   13.60 
  12  -1   4   61.49   14.80 
  12   1  -4   34.70   16.10 
 -12  -1  -4   49.10   13.70 
 -12  -1  -4   37.70   24.90 
 -12   1   4   38.00   18.80 
 -12   1   4   89.09   21.40 
 -12  -1  -4   62.29   12.30 
 -12  -1  -4   47.30   12.80 
 -12  -1   4   88.09   19.20 
 -12   1  -4   62.99   28.10 
 -12  -1   4   20.00   16.20 
  12  -1  -4   63.59   17.60 
  12  -1  -4   55.39   14.00 
  12   1   4   30.30   14.10 
 -12   1  -4   99.29   13.60 
  12   1   4   45.70   15.60 
 -12   1  -4   47.30   11.70 
  12   1   4  107.89   23.50 
 -12   1  -4   41.90   16.60 
 -12  -1   4   52.89   14.00 
 -12  -1   4   82.99   22.20 
 -12   1  -4   68.79   13.80 
 -12  -1   4   67.69   16.50 
 -12   1  -4   78.09   14.20 
  12  -1   5  174.78   28.40 
 -12  -1  -5  127.49   18.00 
 -12   1   5  118.19   18.50 
 -12   1   5  115.69   21.60 
  12  -1   5  132.09   19.50 
 -12  -1  -5  135.69   22.10 
  12   1  -5   94.89   17.60 
  12   1  -5   82.49   19.30 
 -12  -1  -5  136.69   18.00 
 -12  -1  -5  124.29   16.80 
 -12  -1  -5  122.19   16.70 
  12  -1   5  143.89   21.40 
 -12   1   5  103.29   22.10 
 -12  -1   5  131.89   22.80 
 -12   1  -5  116.99   21.00 
 -12   1  -5  114.39   16.80 
 -12  -1   5  125.19   19.40 
 -12   1  -5  120.89   17.40 
 -12  -1   5  100.89   21.20 
 -12   1  -5  119.59   18.00 
 -12   1  -5  117.19   16.40 
  12   1   5   85.99   20.40 
  12  -1  -5   78.59   19.40 
  12   1   5  189.68   28.70 
  12  -1  -5   97.49   17.90 
  12   1   5  114.29   19.20 
 -12  -1   5  113.69   24.70 
 -12  -1  -6   44.50   12.10 
  12  -1   6   26.90   20.20 
 -12   1   6   43.40   16.30 
 -12  -1  -6   25.70   10.10 
  12   1  -6   38.60   15.50 
  12  -1   6   54.99   16.90 
 -12   1   6   37.00   16.20 
  12   1  -6   50.59   11.60 
 -12  -1  -6   48.00   12.30 
 -12  -1  -6   23.90   10.50 
 -12  -1  -6   41.00   14.90 
  12  -1   6   51.09   14.70 
 -12   1  -6   44.10   12.10 
  12   1   6   58.59   22.00 
  12   1   6   48.40   14.60 
 -12   1  -6   35.20   10.40 
  12   1   6   38.50   15.60 
  12  -1  -6   36.60   15.90 
 -12  -1   6   22.30    9.20 
 -12   1  -6   27.90   10.40 
 -12  -1   6   23.40   15.60 
  12  -1  -6   37.70   12.20 
 -12   1  -6   40.00   11.70 
 -12   1  -6   73.69   16.60 
 -12  -1   6   40.10   16.40 
 -12   1   7   26.40   13.00 
  12  -1   7   19.30   12.30 
  12   1  -7   13.60    8.50 
 -12   1   7  -15.90   12.80 
 -12  -1  -7   10.90    7.70 
 -12  -1  -7    8.20    7.80 
 -12  -1  -7    5.90    9.40 
  12  -1   7   13.40   15.30 
  12  -1   7    7.80   11.40 
 -12   1   7    4.50    6.90 
  12   1  -7   16.90   12.60 
  12  -1  -7    3.60   12.90 
 -12  -1   7    2.20   13.80 
 -12   1  -7    4.80    8.90 
  12   1   7   -4.80   10.40 
 -12  -1   7   -1.00   12.30 
  12   1   7    6.70   12.70 
 -12   1  -7   18.50    7.80 
  12   1   7  -13.80   15.80 
  12  -1  -7   16.40    9.60 
 -12   1  -7   -2.50    9.30 
  12  -1  -7   19.80   12.60 
 -12   1   8   -7.10    9.10 
  12   1  -8    3.70    6.30 
 -12  -1  -8   -1.70    5.50 
  12  -1   8   -4.70    8.20 
  12   1  -8    7.20    8.00 
  12  -1   8    1.70    8.90 
  12   1  -8   16.90    9.70 
 -12  -1  -8   -0.90    9.00 
 -12  -1  -8   12.10    7.10 
 -12   1  -8   -1.70    5.40 
 -12  -1   8   -2.70    9.60 
  12  -1  -8    4.40    8.40 
  12  -1  -8   11.30    9.10 
 -12   1  -8    2.50    6.70 
  12   1   8   -0.80    9.10 
  12   1   8   -3.70    8.20 
  12  -1  -8   13.00    7.70 
  13  -1   0   13.60   15.90 
 -13  -1   0   -1.20   12.20 
 -13   1   0  -20.40   11.50 
 -13  -1   0   -4.00   15.30 
 -13  -1   0   15.10   13.70 
  13  -1   0   -1.20   10.60 
 -13   1   0    5.60   11.60 
 -13   1   0   75.49   25.60 
 -13  -1   0   10.40   11.30 
 -13  -1   0   55.89   22.50 
 -13  -1   0   54.49   18.80 
 -13  -1   0    1.10    8.90 
 -13   1   0   11.70   10.60 
  13   1   0    8.70   11.00 
 -13   1   0    4.70   10.30 
 -13   1   0  -16.60   16.80 
 -13   1   0    6.70   11.20 
 -13  -1   0   12.10   10.70 
 -13  -1  -1  319.37   35.30 
 -13   1   1  321.17   35.50 
 -13  -1  -1  294.57   33.50 
 -13   1   1  316.07   35.50 
 -13  -1  -1  349.67   36.20 
  13  -1   1  304.37   39.20 
 -13   1   1  298.77   39.70 
  13  -1   1  311.57   34.30 
 -13   1   1  311.37   34.30 
  13   1  -1  317.87   34.60 
 -13  -1  -1  416.36   45.90 
 -13   1   1  294.57   33.60 
 -13  -1  -1  291.97   38.20 
 -13   1   1  230.78   41.90 
 -13  -1  -1  328.17   35.20 
 -13  -1   1  348.67   45.90 
  13   1   1  257.87   37.40 
 -13   1  -1  312.97   35.90 
  13  -1  -1  312.37   33.90 
 -13  -1   1  309.57   34.30 
 -13  -1   1  303.17   51.89 
 -13   1  -1  284.57   34.60 
 -13   1  -1  322.87   34.90 
 -13   1  -1  325.47   33.90 
 -13  -1   1  300.27   34.80 
 -13  -1   1  294.47   36.10 
 -13  -1   1  342.57   40.00 
 -13   1  -1  287.87   35.10 
  13   1   1  303.37   34.50 
 -13   1  -1  442.46   49.20 
  13  -1  -1  320.07   38.40 
 -13  -1  -2  340.87   43.90 
 -13  -1  -2  267.57   29.80 
 -13  -1  -2  278.77   32.00 
 -13   1   2  254.97   33.00 
 -13  -1  -2  297.27   33.80 
 -13   1   2  258.17   31.40 
  13  -1   2  247.48   34.90 
  13   1  -2  241.38   32.90 
  13  -1   2  285.67   32.20 
 -13   1   2  276.77   35.60 
 -13   1   2  292.67   33.20 
 -13  -1  -2  277.37   31.90 
  13   1  -2  270.47   30.90 
 -13  -1   2  315.07   37.30 
 -13   1  -2  273.47   30.40 
 -13  -1   2  273.87   31.50 
 -13   1  -2  278.57   31.90 
  13  -1  -2  288.17   31.70 
  13   1   2  244.98   31.20 
  13   1   2  247.78   34.90 
 -13   1  -2  265.27   34.20 
  13  -1  -2  262.57   34.20 
 -13  -1   2  277.87   32.20 
 -13   1  -2  265.97   31.80 
 -13  -1   2  288.37   33.40 
 -13  -1   2  275.17   35.30 
  13  -1   3  136.29   21.20 
 -13  -1  -3  153.98   21.70 
 -13   1   3   97.29   24.10 
 -13   1   3  181.78   22.10 
  13  -1   3  163.38   22.00 
 -13  -1  -3  161.58   24.40 
 -13  -1  -3  200.28   31.80 
 -13   1   3  170.48   24.50 
 -13  -1  -3  140.69   19.50 
  13  -1   3  159.78   27.30 
  13   1  -3  152.18   20.50 
 -13   1   3  180.18   28.80 
 -13  -1  -3  118.79   20.10 
 -13   1  -3  171.28   21.90 
  13  -1  -3  133.59   20.30 
  13   1   3  171.98   21.80 
 -13  -1   3  173.98   22.00 
 -13   1  -3  144.69   20.70 
 -13  -1   3  152.78   26.00 
  13   1   3  136.79   22.10 
 -13   1  -3  155.98   20.50 
 -13   1  -3  173.08   24.20 
 -13  -1   3  185.38   25.20 
 -13   1  -3  225.68   35.10 
 -13  -1   3  156.58   21.30 
  13   1   3  190.28   28.50 
 -13  -1   3  167.48   28.10 
  13  -1   4  237.08   25.40 
  13   1  -4  111.49   24.80 
 -13  -1  -4  172.78   22.50 
 -13  -1  -4  232.48   35.90 
 -13   1   4  243.98   25.50 
 -13   1   4  145.39   26.50 
 -13  -1  -4  157.78   22.40 
  13   1  -4  151.08   23.10 
 -13   1   4  209.48   26.00 
  13  -1   4  169.08   24.50 
 -13  -1  -4  213.08   24.40 
  13  -1   4  242.18   32.30 
 -13   1   4  226.98   31.30 
 -13  -1  -4  242.98   28.10 
 -13  -1  -4  170.98   23.70 
 -13   1  -4  173.38   22.30 
  13   1   4  271.47   34.70 
  13   1   4  207.78   24.80 
 -13  -1   4  222.58   28.40 
 -13   1  -4  197.28   27.20 
  13  -1  -4  195.58   24.20 
 -13   1  -4  188.38   24.20 
 -13  -1   4  241.68   32.40 
  13  -1  -4  171.48   26.70 
  13   1   4  146.69   24.20 
 -13   1  -4  161.78   23.20 
 -13  -1   4  200.48   28.60 
 -13  -1   4  194.88   24.90 
 -13   1  -4  196.08   23.40 
 -13  -1   4  211.98   26.10 
 -13  -1  -5  137.79   21.20 
 -13   1   5   90.19   19.60 
  13   1  -5  131.19   17.70 
 -13  -1  -5  124.49   17.70 
 -13  -1  -5  100.09   17.60 
 -13  -1  -5  120.89   16.70 
  13  -1   5  155.88   27.30 
  13  -1   5  125.59   19.30 
 -13  -1  -5  125.39   16.80 
 -13   1   5   89.09   20.70 
 -13   1   5  123.89   18.40 
  13   1  -5   98.39   19.10 
  13  -1   5  115.79   20.40 
 -13   1  -5  106.79   17.50 
  13   1   5  113.79   26.70 
 -13  -1   5  153.68   19.90 
  13  -1  -5   82.29   18.80 
  13   1   5  124.29   20.10 
 -13   1  -5  123.69   16.50 
 -13  -1   5  152.18   21.50 
 -13  -1   5   94.19   20.50 
 -13   1  -5  133.39   18.50 
 -13   1  -5  126.39   21.10 
  13  -1  -5  120.79   18.30 
  13   1   5  153.08   19.70 
 -13  -1   5  100.89   24.50 
 -13   1  -5  109.09   17.20 
 -13  -1  -6    1.90    9.20 
 -13  -1  -6   -6.70   10.50 
 -13   1   6   23.80   14.70 
 -13  -1  -6   12.20   21.00 
  13   1  -6    5.40    8.80 
  13  -1   6    8.30   12.10 
 -13   1   6   12.50    7.80 
 -13  -1  -6   13.10    8.20 
  13   1  -6  -18.00   12.90 
  13  -1   6   22.30   18.50 
  13  -1   6    1.80   13.00 
 -13  -1  -6    5.80    8.50 
 -13   1   6   -7.80   13.30 
 -13  -1   6   -1.70   13.80 
  13   1   6   19.80   12.70 
 -13   1  -6    8.00   10.60 
  13   1   6   34.50   19.20 
  13  -1  -6   18.90   10.40 
 -13   1  -6    2.90    8.00 
  13  -1  -6   10.80   14.10 
 -13   1  -6   11.70   14.70 
 -13  -1   6   -6.80   14.40 
 -13   1  -6   -3.80    9.70 
  13   1   6   17.90   13.70 
  13  -1   7   14.10   11.30 
 -13   1   7  -15.10   10.70 
 -13  -1  -7    2.10    6.80 
  13  -1   7   -0.40   10.20 
 -13  -1  -7   10.20    7.10 
 -13  -1  -7    6.50    8.80 
 -13   1   7    1.20   11.40 
  13   1  -7    6.20   11.10 
  13   1  -7    0.50    7.00 
  13   1  -7    1.60   11.30 
  13  -1   7   21.50   13.80 
  13   1   7   13.80   10.20 
  13  -1  -7    5.10    7.80 
 -13  -1   7   -0.90   11.00 
 -13  -1   7   18.50   11.40 
 -13   1  -7   11.00    8.30 
  13  -1  -7   -4.40   10.90 
 -13   1  -7    8.30    7.10 
 -13   1  -7    6.00    8.20 
  13   1   7    0.80   11.00 
  13  -1  -7   -5.70   10.90 
  13   1   7  -15.20   13.30 
 -13  -1  -8   -0.50    6.00 
 -13  -1  -8    7.10    5.10 
  13  -1   8    6.20    7.40 
 -13   1   8   -6.20    8.00 
  13   1  -8   17.50    8.00 
 -13   1  -8    7.40    5.20 
  13  -1  -8   -5.50    8.30 
  13   1   8    7.20   10.00 
 -13   1  -8   10.60    6.00 
 -13  -1   8   12.60    8.40 
  13  -1  -8   14.40   11.20 
  13   1   8    3.90    7.60 
 -14   1   0   23.80   20.40 
 -14   1   0   30.20   15.00 
  14   1   0   32.30   12.10 
 -14  -1   0   -7.90   13.50 
 -14   1   0   29.80   12.90 
 -14  -1   0   30.60   19.30 
 -14  -1   0   26.30   10.40 
 -14  -1   0   31.50   12.60 
 -14  -1   0   65.89   24.70 
 -14   1   0   20.20   11.20 
 -14   1   0   45.60   12.30 
 -14  -1   0   13.20   13.00 
  14  -1   0   35.30   12.20 
  14  -1   0   43.40   18.00 
 -14   1   1   43.20   21.80 
 -14  -1  -1   19.70   12.80 
  14  -1   1   43.70   18.40 
  14   1  -1   55.09   17.30 
 -14  -1  -1   44.80   11.00 
 -14   1   1   21.80   12.80 
 -14  -1  -1   50.69   20.50 
 -14  -1  -1   98.29   26.70 
 -14   1   1   37.70   15.10 
 -14   1   1   42.80   14.60 
  14  -1   1    5.00   12.40 
 -14  -1  -1   11.90   13.80 
 -14  -1  -1   39.00   15.00 
  14   1  -1   54.99   12.50 
  14  -1  -1   16.40   12.10 
 -14  -1   1   61.89   21.50 
 -14  -1   1   87.89   27.50 
 -14  -1   1   33.20   13.20 
 -14   1  -1   29.00   11.40 
 -14   1  -1  157.78   31.50 
 -14  -1   1   21.80   15.40 
 -14  -1   1   18.90   13.70 
  14   1   1   41.30   12.60 
  14  -1  -1   64.09   18.20 
 -14  -1   1   23.80   16.90 
 -14   1  -1   51.69   16.00 
 -14   1  -1   45.40   13.80 
 -14   1  -1   41.90   13.90 
  14   1   1   17.20   18.20 
 -14   1   2  125.09   18.50 
  14  -1   2  136.19   25.20 
  14   1  -2  152.58   18.30 
 -14  -1  -2  142.39   21.70 
 -14   1   2  127.49   26.00 
 -14  -1  -2  231.38   33.00 
  14   1  -2   99.29   21.00 
 -14  -1  -2  138.09   19.20 
  14  -1   2  112.29   18.40 
 -14   1   2  120.59   19.60 
 -14   1   2  122.89   20.60 
 -14  -1  -2  143.09   19.50 
 -14  -1  -2   87.59   16.20 
 -14  -1   2  179.48   27.10 
 -14   1  -2  117.79   18.90 
  14   1   2  120.89   24.30 
  14   1   2  106.69   18.20 
 -14  -1   2  153.18   19.30 
 -14  -1   2  135.19   20.60 
  14  -1  -2  107.29   17.60 
 -14   1  -2   91.99   20.30 
 -14   1  -2  104.49   17.50 
 -14   1  -2  111.09   18.20 
 -14  -1   2   95.69   22.10 
 -14  -1   2   85.39   19.60 
  14  -1  -2   86.19   20.50 
  14  -1   3   55.69   15.10 
 -14   1   3   27.40   18.20 
 -14  -1  -3   45.60   12.20 
 -14  -1  -3   68.79   17.20 
 -14   1   3   61.79   14.90 
  14   1  -3   50.79   13.00 
 -14  -1  -3   47.10   14.40 
 -14  -1  -3  122.29   29.10 
  14  -1   3   84.89   24.20 
 -14   1   3   34.20   17.40 
 -14  -1  -3   84.79   15.00 
 -14   1   3   80.89   22.80 
  14   1   3   37.70   14.60 
 -14  -1   3   25.70   18.20 
  14   1   3   56.49   22.60 
 -14   1  -3   70.89   17.30 
 -14  -1   3   60.29   17.70 
 -14  -1   3   60.59   15.00 
 -14   1  -3   48.40   13.00 
  14  -1  -3   37.10   13.10 
 -14   1  -3   55.79   14.40 
  14  -1  -3   82.09   18.30 
 -14   1  -3   49.70   14.60 
 -14  -1   3   85.39   22.20 
 -14   1   4  124.99   26.70 
 -14  -1  -4  115.49   19.50 
 -14   1   4  141.49   20.90 
 -14   1   4  108.39   22.60 
 -14  -1  -4  152.18   20.70 
 -14  -1  -4  141.59   18.90 
  14  -1   4  144.99   20.60 
  14   1  -4  179.08   19.90 
 -14  -1  -4  143.19   22.70 
  14   1  -4  106.79   22.50 
  14  -1   4  113.39   19.80 
 -14   1   4  124.99   20.00 
  14  -1   4  208.18   29.80 
  14  -1  -4  153.28   19.80 
 -14  -1   4  118.49   23.30 
  14  -1  -4  136.79   22.30 
 -14   1  -4  149.29   20.70 
 -14  -1   4  149.39   20.60 
 -14   1  -4  189.88   24.50 
 -14  -1   4  132.99   23.20 
 -14  -1   4  154.98   21.10 
  14   1   4  165.98   21.20 
 -14   1  -4  152.28   19.40 
 -14   1  -4  127.99   19.70 
 -14  -1   4  112.19   26.20 
  14   1   4  207.28   29.40 
  14   1   4  169.98   21.40 
 -14  -1  -5   25.90   13.30 
  14   1  -5   10.90   10.30 
 -14   1   5   34.60   13.00 
  14  -1   5   13.60   12.70 
 -14  -1  -5    7.80    9.00 
 -14   1   5   -2.30   14.30 
  14  -1   5   28.70   19.90 
  14   1  -5    9.90   12.70 
 -14  -1  -5   25.40   12.30 
  14  -1   5    8.40   12.10 
 -14   1   5    8.40   13.00 
 -14  -1  -5   27.60   11.50 
  14   1   5   26.00   12.20 
 -14  -1   5   19.00   15.00 
  14  -1  -5   19.10   14.40 
  14   1   5   19.90   21.80 
  14  -1  -5    3.80   10.90 
 -14   1  -5   21.00   10.00 
  14   1   5   28.80   12.80 
 -14  -1   5   20.40   13.20 
 -14  -1   5   14.00   11.80 
 -14   1  -5   45.20   12.30 
 -14   1  -5   38.40   11.90 
  14  -1  -5   -5.70   12.70 
 -14   1  -5   34.50   14.00 
 -14  -1  -6   35.00   11.10 
  14  -1   6   13.10   10.90 
  14   1  -6    6.50   12.10 
 -14  -1  -6   14.50    8.00 
 -14   1   6   16.00   13.70 
  14  -1   6   28.40   16.30 
  14   1  -6   25.00    8.30 
  14  -1   6   23.50   11.70 
 -14   1   6   29.70   12.40 
 -14  -1  -6    2.40   10.10 
  14  -1  -6   19.50    9.40 
  14   1   6   24.10   17.40 
  14   1   6   41.10   12.00 
 -14   1  -6   12.20    8.60 
 -14  -1   6   28.70   12.60 
  14  -1  -6   16.80   13.00 
 -14   1  -6   24.30   10.20 
 -14  -1   6   12.10   12.80 
 -14   1  -6   45.10   10.30 
  14   1   6   29.30   12.30 
  14  -1   7   22.10    9.50 
  14  -1   7   27.40    9.30 
 -14  -1  -7   21.80    6.90 
 -14  -1  -7   23.40    8.00 
  14  -1   7   18.90   11.70 
  14   1  -7   36.10   10.50 
 -14   1   7   17.90   10.40 
 -14   1   7   32.10   10.80 
  14   1  -7   18.10    6.50 
  14   1  -7    6.90    9.20 
 -14  -1  -7   14.00    7.40 
  14   1   7   31.30    9.40 
 -14   1  -7   36.40    8.40 
  14  -1  -7   23.30    9.60 
 -14   1  -7   13.50    6.70 
  14  -1  -7   23.30    9.10 
  14   1   7   50.89   10.40 
 -14  -1   7   20.60   10.80 
 -14  -1   7   34.80   10.80 
  14  -1  -7   25.40    7.40 
  14   1   7   23.30   11.50 
 -15  -1   0   -9.70   14.00 
 -15   1   0   19.40   12.30 
 -15   1   0  -35.10   19.30 
 -15  -1   0   -2.20   14.50 
 -15  -1   0   -5.40   19.60 
 -15  -1   0  -30.40   12.90 
 -15  -1   0   57.79   28.40 
 -15   1   0  -18.90   13.40 
 -15   1   0    5.60   13.90 
  15  -1   0   -5.50   11.70 
 -15   1   0    4.10    9.90 
  15  -1   0   14.30   18.60 
  15   1   0   -6.60   11.40 
  15   1  -1   67.99   19.30 
  15   1  -1   73.89   15.20 
 -15   1   1   77.79   20.10 
 -15  -1  -1   75.19   17.30 
 -15   1   1   51.89   17.80 
  15  -1   1   74.29   15.50 
 -15   1   1  120.29   24.50 
 -15  -1  -1   85.19   13.80 
 -15   1   1   93.09   16.30 
 -15  -1  -1   80.19   17.70 
  15  -1   1  117.29   23.00 
 -15   1   1   72.09   17.10 
 -15  -1  -1   65.79   16.90 
  15  -1   1   73.79   19.50 
 -15  -1  -1  167.18   32.90 
 -15   1  -1  116.39   17.70 
 -15   1  -1   99.19   17.40 
 -15  -1   1   70.29   23.30 
  15  -1  -1   85.39   15.30 
  15   1   1   75.29   21.40 
  15   1   1   61.49   15.20 
 -15   1  -1   87.39   18.40 
 -15  -1   1   92.49   19.10 
 -15  -1   1   85.29   17.80 
 -15  -1   1   69.89   17.60 
 -15  -1   1   99.69   16.50 
  15  -1  -1   75.49   19.50 
 -15   1  -1   72.29   14.20 
 -15   1   2  403.86   46.20 
 -15  -1  -2  420.96   44.40 
 -15  -1  -2  404.26   43.30 
 -15   1   2  422.66   44.40 
  15   1  -2  378.16   42.40 
  15  -1   2  384.76   43.10 
  15  -1   2  429.86   47.60 
 -15   1   2  487.65   49.20 
 -15  -1  -2  342.77   41.00 
 -15   1   2  380.56   44.00 
 -15  -1  -2  425.26   44.00 
 -15   1   2  433.56   43.10 
  15   1  -2  305.27   44.20 
 -15   1  -2  414.76   43.70 
  15  -1  -2  339.47   44.40 
 -15  -1   2  413.46   45.10 
  15   1   2  400.96   49.10 
 -15  -1   2  406.56   43.60 
  15  -1  -2  388.46   42.60 
 -15   1  -2  394.06   43.90 
 -15  -1   2  424.16   50.29 
 -15   1  -2  394.96   41.90 
 -15   1  -2  389.76   43.40 
  15   1   2  432.66   43.10 
 -15  -1   2  397.86   45.40 
  15  -1   3   17.70   20.60 
 -15   1   3   39.40   20.70 
 -15   1   3  -15.40   16.20 
 -15  -1  -3   20.80   15.40 
 -15  -1  -3    7.00   12.70 
  15  -1   3   17.60   13.10 
  15  -1   3   36.00   19.80 
 -15  -1  -3   21.60   13.90 
 -15  -1  -3   13.10    9.60 
 -15  -1  -3  -20.90   13.00 
 -15   1   3   -7.00   12.60 
  15   1  -3   10.60   10.70 
  15   1  -3   40.80   17.50 
 -15  -1   3   42.10   20.80 
  15   1   3   17.00   19.30 
  15  -1  -3   20.20   11.10 
 -15   1  -3    6.60   13.80 
  15   1   3    7.90   12.90 
 -15  -1   3  -23.80   15.00 
 -15   1  -3   28.80   10.90 
 -15  -1   3   -0.50   13.00 
 -15   1  -3   -2.30   12.20 
 -15  -1   3    7.40   15.30 
  15  -1  -3   21.80   16.60 
 -15   1  -3   21.70   12.90 
 -15   1  -3    8.90   15.00 
  15  -1   4   39.50   20.20 
 -15   1   4   30.30   11.90 
 -15  -1  -4   -5.10   12.80 
  15  -1   4    6.80   11.00 
  15   1  -4   15.00   10.60 
 -15  -1  -4   28.20   12.80 
 -15  -1  -4   37.90   12.60 
 -15   1   4   15.40   15.50 
 -15  -1  -4   22.30   15.20 
  15   1  -4   22.50   14.60 
  15  -1   4   13.80   16.80 
 -15   1   4   25.00   12.10 
  15  -1   4   50.69   13.20 
 -15  -1  -4   27.10    9.70 
 -15   1   4   40.00   20.40 
 -15  -1   4   31.40   18.70 
 -15   1  -4   36.70   12.60 
  15  -1  -4   32.90   11.00 
 -15  -1   4   23.80   16.30 
  15   1   4   37.50   19.30 
  15  -1  -4   21.10   14.90 
 -15   1  -4   53.69   15.70 
 -15   1  -4    5.10    9.70 
 -15  -1   4   23.60   14.50 
  15   1   4   21.70   12.80 
 -15  -1   4   22.60   12.80 
  15   1   4    8.40   11.30 
 -15   1  -4   20.50   12.00 
 -15  -1   4   26.60   15.70 
  15   1  -5   19.20   11.70 
 -15   1   5   10.10   11.20 
  15  -1   5   -6.50   17.00 
 -15   1   5    6.00   10.70 
 -15  -1  -5   -1.50   10.70 
  15  -1   5   -6.00   11.00 
  15   1  -5    1.90    8.70 
 -15   1   5   -6.40   12.30 
 -15  -1  -5    4.10   11.90 
  15  -1   5    4.40    9.50 
 -15  -1  -5   -1.70    7.60 
  15   1  -5   20.20   12.40 
 -15  -1  -5   15.00   10.10 
 -15  -1   5    1.80   13.60 
  15   1   5   17.90   18.70 
 -15   1  -5    3.40    8.40 
 -15  -1   5    5.20   10.30 
  15   1   5   21.40   11.00 
 -15   1  -5    6.80   10.40 
  15   1   5   10.40   10.20 
 -15   1  -5   -0.90   10.20 
  15   1   5  -28.80   14.90 
  15  -1  -5    2.50   12.80 
  15  -1  -5   17.50    9.80 
  15  -1  -5   -7.50   11.70 
 -15   1   6   17.30   11.20 
  15  -1   6    6.60   13.60 
  15  -1   6   11.50    8.70 
 -15  -1  -6   -3.00    8.70 
 -15  -1  -6    4.30    6.60 
  15  -1   6   32.30   10.10 
  15   1  -6   -2.90   10.10 
  15   1  -6    4.60    6.40 
 -15   1   6   21.60    9.90 
 -15  -1  -6    3.20    8.40 
  15  -1  -6   23.70   10.90 
  15  -1  -6   15.80    7.60 
 -15   1  -6   12.00    8.30 
  15   1   6    6.20    9.30 
  15   1   6   14.80   15.70 
 -15   1  -6   -1.90    6.50 
 -15  -1   6    4.30   10.40 
 -15   1  -6   11.60    8.40 
 -15   1  -6    3.80    9.30 
 -15  -1   6    8.80    9.50 
  15   1   6   22.20    9.00 
 -15  -1  -7   -6.60    7.20 
  15   1   7   -2.10   10.60 
 -15   1  -7    1.70    5.80 
 -15   1  -7    0.10    8.00 
  15  -1  -7    9.50    9.80 
  16   1   0    9.10   11.30 
  16   1   0   34.00   19.00 
 -16   1   0   18.10   14.80 
  16  -1   0    8.00   11.60 
 -16  -1   0   -1.40   19.90 
  16  -1   0   28.90   18.50 
 -16   1   0   26.50   12.50 
 -16   1   0    8.10   13.50 
 -16  -1   0    2.10   14.10 
 -16  -1   0   38.40   15.00 
 -16  -1  -1   26.50    9.70 
  16  -1   1   16.10   12.90 
 -16   1   1   57.19   16.60 
 -16   1   1   38.60   15.20 
  16   1  -1   41.70   12.50 
 -16   1   1   45.40   21.40 
  16  -1   1   90.29   20.90 
 -16  -1  -1   38.70   14.40 
  16  -1   1   49.60   17.40 
 -16   1   1   35.40   13.20 
 -16   1   1   29.90   14.20 
  16   1  -1   52.09   17.40 
 -16  -1  -1   34.60   15.30 
 -16   1  -1   31.20   15.50 
 -16  -1   1   16.50   13.40 
  16  -1  -1   66.59   17.80 
 -16  -1   1   73.79   16.20 
 -16   1  -1   52.49   15.30 
 -16  -1   1   47.10   16.30 
  16   1   1   40.90   17.00 
  16  -1  -1   41.20   12.80 
 -16  -1   1   31.80   20.80 
  16   1   1   79.49   20.80 
  16   1   1   13.20   12.40 
 -16  -1   1   40.40   15.90 
 -16   1  -1   37.10   11.00 
 -16   1   2   25.00   12.80 
 -16   1   2   14.00   13.60 
 -16  -1  -2   -3.10   13.20 
  16  -1   2   34.90   19.50 
 -16  -1  -2    8.80   12.60 
 -16  -1  -2   16.90    8.90 
 -16  -1  -2   -7.10   12.20 
 -16   1   2   -3.20   15.30 
  16  -1   2   25.20   12.00 
  16   1  -2    2.00    9.80 
  16  -1   2   10.70   17.40 
 -16   1   2   10.40   20.70 
  16   1  -2  -10.70   13.00 
  16  -1  -2    6.30   13.60 
 -16  -1   2   44.00   20.90 
 -16   1  -2   -6.00   13.00 
 -16   1  -2   11.60   12.60 
 -16  -1   2    5.60   14.70 
  16  -1  -2    6.00   10.50 
 -16  -1   2    9.10   14.20 
 -16   1  -2   25.70   10.20 
  16   1   2   28.50   17.80 
 -16   1  -2   18.60   12.50 
  16  -1  -2   25.90   17.00 
  16   1   2   20.00   11.60 
 -16  -1   2   19.70   12.40 
 -16   1   3   26.70   15.80 
 -16   1   3   28.10   12.90 
  16   1  -3   48.20   11.10 
  16  -1   3   26.60   18.50 
 -16  -1  -3   30.20   14.40 
  16  -1   3   75.19   19.20 
 -16  -1  -3   28.60    9.90 
  16   1  -3   48.90   16.10 
 -16  -1  -3   51.39   12.80 
 -16   1   3   12.00   20.10 
 -16  -1  -3   40.50   12.90 
  16  -1   3   31.40   12.70 
  16   1   3   38.80   18.60 
 -16  -1   3   32.00   15.10 
  16   1   3   43.50   13.00 
 -16   1  -3   46.00   13.60 
 -16   1  -3   42.30   12.90 
  16  -1  -3   41.60   15.80 
  16  -1  -3   29.30   11.30 
 -16   1  -3   38.80   13.40 
 -16  -1   3   88.09   21.30 
 -16  -1   3   39.10   13.60 
 -16  -1   3   22.20   15.90 
 -16   1  -3   47.70   11.40 
 -16  -1  -4   31.30   11.80 
 -16  -1  -4   19.60    8.20 
 -16   1   4   11.70   11.80 
 -16  -1  -4    7.00   12.50 
  16  -1   4   15.20   14.80 
  16   1  -4   -3.30   12.80 
  16  -1   4   22.20   17.70 
 -16   1   4   16.30   14.30 
  16   1  -4   21.90    9.50 
 -16  -1  -4   20.60   10.90 
  16  -1   4   18.00   11.40 
 -16   1  -4   25.90    9.20 
 -16   1  -4   31.10   11.00 
 -16  -1   4   16.90   14.70 
 -16   1  -4   15.60   11.80 
 -16   1  -4   18.20   11.10 
  16   1   4   13.80   11.10 
 -16  -1   4   42.40   18.00 
  16   1   4   23.10   17.70 
  16   1   4   46.10   17.80 
  16  -1  -4   18.10    9.80 
 -16  -1   4    7.00   11.10 
  16  -1  -4    7.30   13.10 
 -16  -1  -5   17.40    6.90 
  16  -1   5    7.70    8.00 
  16   1  -5   13.20   10.40 
 -16  -1  -5   -2.10    9.40 
 -16   1   5  -11.80   10.80 
  16   1  -5   -5.40    7.30 
 -16  -1  -5   -7.20    8.50 
  16  -1   5   -4.50    9.40 
  16  -1   5   -3.70   13.90 
 -16   1   5   10.40    8.30 
 -16  -1  -5    9.00   10.00 
  16   1  -5    6.80   10.70 
  16   1   5   -3.60    9.80 
 -16   1  -5   -3.40    9.70 
  16   1   5   27.40    8.40 
  16  -1  -5    0.50    9.30 
 -16  -1   5   -5.10   11.00 
 -16   1  -5    2.40    8.80 
  16   1   5   -7.30   12.80 
  16  -1  -5   10.10   11.10 
 -16  -1   5   29.20   12.40 
  16   1   5   15.90   15.00 
  16  -1  -5    0.40    7.80 
 -16   1  -5   11.40    7.40 
 -16   1  -5    3.10    8.70 
  16  -1   6   -0.50    7.50 
  16  -1   6    6.40   10.70 
 -16  -1  -6    1.90    7.10 
  16   1  -6   -2.50    7.70 
  16  -1   6   -6.10    7.60 
 -16   1   6    8.00    9.00 
 -16  -1  -6    3.30    5.40 
 -16   1   6   12.30    7.80 
 -16  -1  -6    1.00    6.40 
 -16   1  -6   -6.50    5.40 
 -16   1  -6    1.80    7.10 
  16   1   6    4.00   10.70 
  16  -1  -6    3.90    7.80 
 -16  -1   6    1.90    8.70 
  16  -1  -6   -8.90   10.00 
  16   1   6   -9.80    7.70 
 -16   1  -6    5.80    7.00 
  16   1   6    4.30    7.30 
  16  -1  -6    6.50    5.80 
  17   1   0    8.50   16.20 
  17  -1   0    5.50   10.60 
 -17   1   0    4.30   12.90 
 -17  -1   0  -15.50   12.80 
 -17  -1   0  -14.60   12.00 
 -17   1   0   15.10   14.30 
 -17   1   0   15.70   12.60 
  17   1   0    3.20   10.40 
  17  -1   0   21.10   16.50 
 -17  -1   0  -13.70   17.30 
 -17   1   1    0.10   11.20 
  17   1  -1   -0.70   13.30 
  17  -1   1   -7.70   12.90 
  17  -1   1   33.60   17.40 
  17   1  -1   -6.70   10.10 
 -17   1   1    8.10   12.40 
 -17   1   1   18.50   12.80 
 -17  -1  -1   -4.10   13.20 
 -17   1   1   37.00   13.70 
 -17  -1  -1  -15.80   12.10 
 -17   1   1  -15.90   18.60 
  17  -1   1   -3.70   10.50 
  17   1   1   27.80   16.10 
 -17  -1   1    4.60   12.90 
  17   1   1   46.80   17.90 
 -17   1  -1   -5.60   11.80 
 -17  -1   1   13.20   11.80 
  17  -1  -1    8.70   10.30 
  17   1   1    6.50   10.80 
 -17  -1   1   26.40   13.60 
 -17   1  -1   -5.50   12.40 
  17  -1  -1    9.40   14.90 
 -17  -1   1    3.70   18.40 
 -17   1   2   19.70   13.00 
  17  -1   2   18.20   11.00 
 -17   1   2    2.80   11.10 
 -17   1   2   21.50   13.80 
  17  -1   2   15.80   16.20 
  17  -1   2    5.10   14.00 
 -17  -1  -2   14.40   12.00 
 -17  -1  -2    4.40    7.50 
  17   1  -2   27.00   15.80 
 -17   1   2   -1.50   18.10 
 -17  -1  -2  -12.80   12.00 
  17   1  -2   15.40   12.30 
  17   1  -2   16.00    9.10 
 -17   1  -2   17.00   12.30 
 -17  -1   2   30.00   19.10 
 -17  -1   2   -8.20   13.10 
 -17   1  -2   12.80   12.20 
 -17   1  -2   13.20    8.70 
 -17  -1   2    5.10   13.00 
  17  -1  -2   12.80    9.70 
  17   1   2   29.70   17.40 
  17  -1  -2   23.50   14.80 
  17  -1  -2    3.40   12.20 
 -17  -1   2   28.20   11.30 
  17   1   2   17.90   11.00 
  17   1   2   -7.40   13.80 
  17   1  -3   39.50    9.60 
 -17  -1  -3   18.40   11.40 
 -17  -1  -3   31.80    8.30 
  17  -1   3   29.30   15.80 
  17  -1   3   61.29   16.50 
  17   1  -3   -6.10   14.00 
 -17  -1  -3   24.30   11.80 
 -17   1   3   23.20   13.80 
 -17   1   3   53.69   12.50 
 -17  -1  -3   59.39   12.50 
  17  -1   3   55.99   11.80 
 -17  -1   3   20.30   13.10 
  17  -1  -3   40.50   14.80 
 -17  -1   3   63.89   18.80 
 -17   1  -3   21.10    8.80 
  17   1   3   80.59   17.70 
  17  -1  -3   16.80    9.70 
  17   1   3   53.79   11.60 
 -17   1  -3   42.60   12.40 
 -17  -1   3   24.90   12.10 
 -17   1  -3   50.39   13.00 
 -17  -1   3   49.00   14.60 
  17   1   3   38.60   15.50 
 -17   1  -3   49.50   11.90 
  17   1  -4   26.30   11.40 
  17   1  -4   29.90    8.10 
  17  -1   4   26.60    9.80 
 -17   1   4    9.70    9.70 
 -17  -1  -4    6.10    9.70 
  17  -1   4   23.50   14.10 
 -17  -1  -4   17.30   10.30 
 -17  -1  -4   21.70   10.30 
 -17   1   4   21.50   12.20 
 -17  -1  -4   19.10    6.70 
  17  -1   4   28.90   14.60 
  17  -1  -4   28.00   12.20 
 -17   1  -4   18.40    7.50 
 -17  -1   4   30.80   12.90 
  17   1   4   24.70   13.10 
  17  -1  -4   26.00    8.40 
 -17   1  -4   19.40    9.50 
 -17   1  -4    6.80   10.00 
  17   1   4   23.30   10.10 
 -17   1  -4   25.50    9.80 
  17  -1  -4   -4.70   10.40 
  17   1   4   26.70   14.20 
  17   1  -5   -0.80    5.90 
  17  -1   5   14.60    7.80 
  17  -1   5    0.50   11.10 
 -17  -1  -5    7.80    7.70 
  17   1  -5   13.40    9.10 
 -17  -1  -5    4.30   11.30 
 -17  -1  -5   -0.90    7.50 
 -17   1   5   10.70    9.50 
  17  -1  -5    3.90    9.10 
 -17   1  -5    4.60    7.30 
  17   1   5   -5.70    7.30 
 -17   1  -5   11.80    7.90 
  17  -1  -5    1.80    5.70 
 -17   1  -5    9.20    7.90 
  17   1   5   -0.80   11.10 
  17  -1  -5   -6.40    9.50 
 -17  -1   5   -0.30    9.00 
 -17   1  -5    9.00    5.30 
 -18   1   0   56.99   13.80 
 -18  -1   0   52.49   14.40 
  18  -1   0   81.59   12.40 
  18  -1   0   65.89   17.10 
 -18  -1   0   67.89   14.90 
 -18   1   0   62.89   13.80 
  18   1   0   55.99   16.00 
  18   1   0   64.89   12.10 
  18  -1   0   79.09   17.10 
 -18   1   1    2.80    9.30 
  18   1  -1   12.10   12.50 
  18   1  -1   16.20   13.80 
 -18  -1  -1    8.30   11.10 
 -18  -1  -1   -6.50   10.70 
  18  -1   1   23.30    9.80 
  18   1  -1   -2.00    8.10 
 -18   1   1   16.50   15.00 
 -18   1   1   23.80   11.80 
  18  -1   1    0.10   14.20 
  18  -1  -1   19.60    9.10 
 -18   1  -1   24.20   12.00 
 -18  -1   1   -1.30   15.70 
  18   1   1   23.60   14.30 
  18  -1  -1   17.30   14.20 
  18  -1  -1    3.20   12.00 
 -18  -1   1   28.50   12.70 
  18   1   1    8.20    9.30 
 -18   1  -1    6.00   11.00 
  18  -1   2  132.89   15.40 
  18  -1   2  143.99   20.00 
  18   1  -2   97.19   14.00 
  18   1  -2  118.99   18.00 
 -18  -1  -2   94.99   15.90 
 -18  -1  -2   92.29   16.20 
  18  -1   2   92.69   17.10 
 -18   1   2  122.69   16.30 
 -18   1   2  114.39   17.30 
  18  -1  -2  112.19   16.10 
 -18  -1   2  115.79   17.30 
 -18  -1   2  103.59   16.10 
 -18  -1   2  128.09   17.80 
 -18   1  -2   93.99   16.20 
  18   1   2   83.09   17.20 
  18   1   2  127.39   20.00 
  18  -1  -2   81.19   16.70 
 -18   1  -2  133.49   17.00 
 -18  -1   2  107.49   20.60 
  18  -1  -2  107.29   14.50 
  18   1   2  127.79   15.50 
  18  -1   3   -0.10   11.10 
  18  -1   3    6.00    8.20 
 -18   1   3   -2.00    8.40 
  18  -1   3    0.30   11.80 
  18   1  -3   -3.10    6.80 
  18   1  -3   12.40   11.40 
 -18   1   3   11.60   10.80 
 -18  -1  -3   16.20    9.30 
 -18  -1  -3  -18.10    8.80 
  18  -1  -3    7.50   10.70 
  18   1   3   -8.70   12.00 
 -18   1  -3   12.60    8.90 
 -18   1  -3   13.70    9.80 
  18   1   3   18.90    8.60 
  18  -1  -3   -6.10    7.20 
 -18  -1   3    6.70   10.60 
  18   1   3   -4.60   11.30 
 -18   1   4   10.30    9.00 
  18  -1   4   15.20   15.30 
 -18  -1  -4   15.00    8.50 
  18  -1   4   15.40    7.80 
  18   1  -4    5.70    8.70 
  18  -1   4   15.50   10.90 
  18   1  -4   29.10    9.90 
 -18  -1  -4   24.00    8.90 
  18   1   4   10.30   10.10 
  18   1   4   12.20    7.70 
 -18   1  -4   11.50    8.00 
  18  -1  -4   19.00    9.00 
  18  -1  -4   -5.10    8.50 
  18   1   4    1.80   10.20 
 -18  -1   4   16.90    9.50 
  18  -1  -4   12.20    7.40 
 -18   1  -4   11.00    7.30 
 -19   1   0    1.50    9.10 
 -19  -1   0    6.70    9.90 
  19   1   0    8.80   11.00 
  19  -1   0  -12.80   10.20 
  19   1   0    4.80   11.90 
  19  -1   0   -0.10   10.90 
  19   1   0   -2.30    6.80 
  19  -1   0   -0.60    7.20 
  19  -1   1   14.80    8.00 
  19  -1   1   12.80   11.70 
  19   1  -1   13.00    9.30 
  19   1  -1   17.20   11.30 
  19  -1   1  -15.20   10.30 
 -19  -1  -1    3.90    9.00 
  19   1  -1   13.90    6.90 
 -19   1   1    4.80    9.50 
 -19   1  -1   13.70    9.60 
  19   1   1   18.40   11.30 
  19   1   1   -1.40    7.60 
  19  -1  -1   10.90    9.30 
  19  -1  -1   16.20    7.30 
 -19   1  -1   10.80    9.10 
 -19  -1   1   21.50   10.00 
  19   1   1    4.30   10.80 
  19  -1  -1    2.30   11.00 
  19  -1   2   10.70   11.10 
 -19  -1  -2    9.30    8.40 
  19  -1   2   23.40   12.60 
 -19   1   2   22.00   12.30 
 -19   1   2    0.70    7.70 
  19  -1   2   16.50    7.50 
  19   1  -2    4.40    7.10 
  19   1  -2   -1.40    9.70 
 -19  -1  -2    4.20    8.30 
 -19   1  -2   21.70    9.20 
  19  -1  -2   14.00    9.90 
  19   1   2   22.50    7.40 
 -19   1  -2    7.60    8.30 
 -19  -1   2   11.60    9.50 
  19   1   2    2.60   12.00 
  19  -1  -2    0.30    6.40 
  19   1   2    6.30   11.20 
  19  -1   3   19.50   14.40 
  19  -1   3   18.80    7.70 
 -19  -1  -3   29.40    8.00 
  19   1  -3    8.00   11.00 
  19   1  -3   22.10   12.50 
  19  -1  -3   -1.50    9.00 
  19   1   3   19.00   11.40 
  19   1   3   17.40    7.80 
 -19   1  -3   26.70   10.20 
 -19   1  -3   17.10    8.60 
   0  -2   0 6097.19  579.54 
   0  -2   0 6006.10  580.04 
   0   2  -1 1527.65  136.69 
   0   2   1 1403.86  136.59 
   0  -2   1 1386.26  136.69 
   0  -2   1 1375.46  136.69 
   0  -2  -1 1464.15  136.69 
   0   2   1 1394.96  136.49 
   0  -2   1 1471.35  136.59 
   0  -2  -1 1354.26  136.89 
   0   2  -2 1576.44  142.69 
   0   2   2 1487.95  142.59 
   0  -2   2 1496.25  142.89 
   0  -2  -2 1467.75  142.69 
   0  -2  -2 1372.96  142.99 
   0  -2  -3  211.88   25.70 
   0   2   3  223.78   24.60 
   0  -2   3  242.78   25.80 
   0  -2  -3  230.18   24.80 
   0   2  -3  238.68   24.90 
   0   2  -4   69.49   12.30 
   0   2  -4  105.89   16.90 
   0  -2  -4   63.39   12.20 
   0  -2  -4   85.39   15.30 
   0   2  -5  467.65   50.79 
   0   2  -5  472.05   48.00 
   0  -2  -5  452.75   49.60 
   0  -2  -5  445.36   47.80 
   0  -2  -6   47.10   12.50 
   0   2  -6   38.60    8.00 
   0   2   6   40.40   10.50 
   0   2   6   32.50   10.50 
   0  -2   6   16.80   16.60 
   0  -2  -6   18.50    8.80 
   0  -2   6   30.80    9.70 
   0  -2   6   39.40    9.90 
   0  -2  -6   25.30   10.90 
   0   2  -6   23.10   10.90 
   0  -2  -6   16.60   11.00 
   0  -2  -7   78.49   14.80 
   0  -2  -7   62.79   12.80 
   0  -2  -7   54.79   12.00 
   0   2  -7   71.69   11.80 
   0  -2   7   33.70   17.70 
   0  -2  -7   72.69   11.80 
   0   2  -7   52.19   13.60 
   0  -2  -7   79.19   14.80 
   0  -2   7   72.49   13.50 
   0   2   7   65.99   14.40 
   0  -2   7   28.30   11.70 
   0   2   7   70.09   13.20 
   0   2  -7   53.69   14.50 
   0  -2  -8   63.19   14.80 
   0  -2  -8   83.49   14.50 
   0   2  -8   71.49   14.80 
   0   2   8   79.99   16.70 
   0   2   8   56.19   14.10 
   0   2  -8   68.89   13.00 
   0  -2  -8   83.59   13.30 
   0   2  -8   80.89   16.50 
   0  -2  -8   57.69   13.40 
   0  -2   8   69.39   15.30 
   0   2  -9   81.99   13.50 
   0  -2  -9   76.09   12.50 
   0  -2   9   81.49   14.40 
   0  -2  -9   62.49   13.40 
   0   2  -9   71.79   14.80 
   0   2  -9   66.99   12.20 
   0   2   9  108.29   15.70 
   0  -2  -9   50.69   13.50 
   0  -2   9  105.49   14.80 
   0   2   9   96.99   15.40 
   0  -2 -10    8.60    6.20 
   0  -2 -10   13.10    7.50 
   0  -2 -10    6.70    6.60 
   0  -2  10   13.30    8.10 
   0   2 -10    9.30    8.00 
   0   2  10    9.70    7.90 
   0   2 -10   10.00    6.70 
   0  -2  10    9.00    8.20 
   0   2 -10   10.20    6.80 
   0   2  10   15.30    8.80 
   1  -2   0  725.73   69.59 
  -1  -2   0  758.32   69.69 
   1  -2   0  691.13   69.39 
   1  -2   0  698.83   69.49 
  -1  -2   0  750.12   69.49 
   1  -2   0  717.33   70.19 
  -1  -2   0  721.93   69.89 
  -1  -2  -1 2129.99  188.88 
  -1  -2  -1 1945.31  188.88 
   1   2  -1 2096.19  189.08 
   1  -2   1 1956.90  188.78 
   1  -2   1 1916.41  189.08 
   1   2   1 1961.20  188.88 
   1  -2  -1 1862.91  189.48 
  -1  -2   1 1742.23  188.88 
   1  -2  -1 2048.30  189.08 
   1   2   1 1972.90  188.88 
  -1  -2   1 1987.40  188.98 
  -1  -2   1 2002.90  189.28 
  -1  -2  -2  215.18   22.20 
   1   2  -2  211.18   22.60 
   1  -2   2  219.98   23.00 
  -1  -2  -2  191.78   22.20 
   1  -2  -2  207.58   22.90 
   1  -2  -2  207.38   24.10 
  -1   2  -2  236.38   22.40 
   1   2   2  219.58   22.40 
  -1  -2   2  219.38   24.40 
  -1  -2  -3  597.64   64.49 
   1  -2   3  631.44   64.89 
   1   2  -3  681.43   66.19 
  -1  -2  -3  666.93   64.29 
   1   2  -3  682.93   64.59 
   1   2   3  662.33   64.49 
   1  -2  -3  674.63   64.69 
  -1   2  -3  665.23   64.39 
   1  -2  -3  624.64   65.79 
   1   2  -4  588.74   61.69 
   1  -2   4  618.74   60.09 
  -1  -2  -4  526.75   58.09 
   1   2  -4  601.94   59.59 
  -1  -2  -4  580.64   59.99 
  -1  -2  -4  602.74   59.19 
  -1   2  -4  540.85   58.19 
   1  -2  -4  580.54   61.29 
  -1   2  -4  595.84   60.79 
  -1  -2   4  624.94   62.39 
   1   2   4  623.44   59.69 
  -1   2  -4  609.14   59.29 
   1  -2  -4  598.64   59.59 
   1   2  -5  240.88   28.00 
   1   2  -5  249.58   32.80 
  -1  -2  -5  243.78   27.50 
   1  -2  -5  248.18   31.30 
  -1  -2   5  211.28   34.40 
   1  -2  -5  238.88   28.10 
  -1   2  -5  215.38   29.90 
  -1   2  -5  255.67   27.90 
   1  -2   6  200.88   25.50 
  -1  -2  -6  174.48   21.60 
   1   2  -6  158.98   22.20 
  -1  -2  -6  166.28   22.40 
   1   2  -6  169.08   21.10 
  -1   2   6  218.48   23.10 
   1  -2   6  177.68   21.80 
  -1  -2  -6  197.98   21.60 
  -1  -2  -6  163.78   21.00 
  -1   2   6  231.98   22.90 
   1   2  -6  201.98   30.30 
  -1  -2  -6  147.29   25.10 
   1  -2   6  209.08   22.60 
  -1  -2   6  221.98   22.30 
   1  -2  -6  187.38   22.00 
   1   2   6  162.18   21.50 
  -1   2  -6  176.98   22.20 
  -1   2  -6  191.38   22.10 
  -1  -2   6  198.28   22.30 
  -1  -2   6  102.29   29.40 
  -1   2  -6  156.58   20.50 
  -1  -2   6  164.58   25.90 
   1  -2  -6  196.18   22.20 
   1   2   6  186.68   22.40 
   1  -2  -6  199.78   21.10 
  -1  -2  -7  220.28   25.10 
  -1  -2  -7  206.18   23.60 
  -1  -2  -7  237.08   25.00 
   1   2  -7  193.68   24.80 
   1  -2   7  183.68   24.10 
   1   2  -7  200.68   23.20 
  -1  -2  -7  219.48   24.40 
  -1   2   7  217.38   25.40 
  -1   2   7  233.58   25.80 
   1  -2   7  208.58   24.90 
   1   2  -7  173.08   24.80 
  -1  -2  -7  182.98   23.20 
   1  -2  -7  216.58   24.50 
  -1   2  -7  187.78   24.00 
  -1  -2   7  202.28   24.70 
  -1   2  -7  184.98   23.10 
   1  -2  -7  200.08   25.40 
   1  -2  -7  242.08   25.70 
  -1  -2   7  186.88   27.40 
   1   2   7  224.98   25.70 
   1  -2  -7  177.38   22.70 
  -1  -2   7  163.78   23.50 
  -1   2  -7  207.28   25.10 
   1   2   7  202.18   24.70 
   1   2  -8  213.88   26.50 
   1   2  -8  207.48   26.20 
   1  -2   8  246.28   26.60 
   1  -2   8  254.17   26.80 
  -1  -2  -8  172.38   24.90 
  -1  -2  -8  196.68   25.10 
  -1  -2  -8  206.28   24.00 
   1   2  -8  238.08   24.90 
   1  -2   8  249.68   27.30 
  -1  -2  -8  221.08   26.10 
  -1   2   8  163.98   25.30 
  -1   2   8  244.38   27.50 
   1  -2  -8  226.08   24.60 
   1  -2  -8  220.38   26.00 
  -1   2  -8  170.48   26.50 
  -1   2  -8  190.38   25.30 
  -1  -2   8  185.28   25.30 
  -1   2  -8  244.68   27.00 
   1   2   8  163.98   25.50 
   1  -2  -8  232.58   25.30 
   1   2   8  186.78   26.00 
  -1  -2   8  207.08   26.40 
  -1   2  -8  211.28   24.50 
   1  -2  -8  241.48   27.10 
   1   2  -9   82.19   15.20 
   1  -2   9  111.59   16.10 
  -1   2   9   69.39   14.80 
  -1  -2  -9   65.29   13.30 
   1  -2   9  111.09   16.10 
  -1   2   9  112.59   16.90 
   1   2  -9   75.89   15.60 
   1   2  -9   82.29   13.50 
  -1  -2  -9   89.89   13.40 
  -1  -2  -9   97.49   14.90 
  -1  -2  -9  105.69   14.90 
  -1   2  -9  103.39   14.60 
   1   2   9  102.59   16.00 
   1   2   9  121.19   17.40 
   1  -2  -9   87.49   14.80 
  -1  -2   9   73.59   14.80 
  -1   2  -9   98.79   13.40 
   1  -2  -9   80.09   13.50 
   1  -2  -9  106.79   15.90 
  -1   2  -9   89.59   16.10 
  -1  -2   9   78.89   15.50 
  -1  -2   9   88.19   15.50 
   1   2 -10    4.50    7.30 
  -1  -2 -10    8.60    6.40 
   1  -2  10    3.80    7.90 
  -1   2  10   30.60    9.10 
   1   2 -10   10.10    6.80 
   1   2 -10    4.00    7.80 
  -1  -2 -10    5.70    6.70 
  -1   2  10    0.00    8.70 
  -1  -2 -10   20.30    7.80 
   1  -2  10   22.60    8.10 
  -1   2  10    2.80    7.50 
  -1   2 -10    0.20    6.20 
   1   2  10    9.40    7.80 
  -1  -2  10    2.50    8.00 
   1  -2 -10   12.80    7.10 
  -1  -2  10    8.00    7.50 
  -1  -2  10   11.70    7.80 
   1   2  10   17.90    9.30 
  -1   2 -10    3.00    7.40 
  -1   2 -10    7.70    6.50 
   1  -2 -10   11.00    7.60 
   1  -2 -10   -2.40    6.40 
  -1  -2  10    4.90    8.60 
  -2   2   0 1712.23  161.68 
  -2  -2   0 1639.24  161.58 
  -2  -2   0 1638.74  162.08 
  -2   2   0 1654.43  161.88 
   2  -2   0 1695.93  161.48 
   2  -2   0 1754.32  161.58 
  -2  -2   0 1679.13  161.68 
   2  -2   0 1697.43  162.48 
  -2  -2  -1 4074.19  392.96 
   2  -2   1 4088.89  393.06 
   2   2  -1 4322.57  393.46 
  -2  -2  -1 4209.48  393.16 
  -2  -2  -1 3982.30  393.36 
   2  -2   1 4034.60  393.46 
   2   2   1 4003.70  393.06 
   2  -2  -1 3950.10  394.26 
   2   2   1 4097.59  393.36 
  -2  -2   1 4088.49  393.96 
   2  -2  -1 4285.97  393.56 
  -2  -2  -2  310.57   30.60 
   2   2  -2  288.17   33.00 
   2   2  -2  312.57   31.40 
   2  -2   2  312.37   31.70 
  -2  -2  -2  278.97   30.20 
   2  -2  -2  309.87   31.60 
   2   2   2  319.07   31.30 
   2  -2  -2  298.57   33.30 
  -2  -2   2  319.77   33.50 
  -2   2  -2  330.97   30.90 
   2   2   2  305.47   30.40 
  -2  -2  -3   81.69   10.90 
   2   2  -3   86.39   15.80 
   2  -2   3   84.89   12.90 
   2   2  -3   94.99   12.60 
  -2  -2  -3   71.59   11.30 
   2   2   3   70.49   11.80 
  -2   2  -3   93.69   11.30 
  -2  -2   3   70.99   13.50 
   2  -2  -3   77.89   15.00 
   2  -2  -3   89.79   12.40 
   2   2  -4  804.42   83.09 
  -2  -2  -4  804.22   79.99 
   2  -2   4  866.61   81.29 
   2   2  -4  819.42   80.69 
  -2  -2  -4  767.62   79.59 
   2   2   4  825.62   80.79 
   2  -2  -4  815.62   82.99 
  -2   2  -4  809.42   80.19 
   2  -2  -4  832.42   80.69 
  -2   2  -4  742.53   79.59 
  -2  -2   4  872.61   83.79 
  -2  -2  -5  162.98   21.50 
   2  -2   5  191.48   25.70 
  -2  -2  -5  177.58   22.50 
   2   2  -5  190.78   23.60 
   2   2  -5  222.68   30.10 
  -2  -2   5  166.38   26.90 
  -2   2  -5  177.28   29.80 
  -2   2  -5  169.88   21.90 
   2   2   5  177.28   24.70 
   2  -2  -5  205.28   28.70 
  -2   2  -5  192.08   22.90 
   2  -2  -5  188.38   23.70 
  -2   2   6  179.98   23.30 
  -2  -2  -6  216.18   23.70 
  -2  -2  -6  191.08   23.50 
  -2   2   6  206.68   23.50 
   2   2  -6  236.98   33.10 
  -2  -2  -6  183.68   22.30 
  -2   2   6  135.49   30.90 
   2  -2   6  194.98   24.00 
   2   2  -6  223.78   24.10 
   2   2  -6  188.08   22.20 
   2  -2   6  219.08   23.80 
  -2  -2  -6  192.68   22.50 
  -2  -2  -6  220.48   24.00 
   2  -2  -6  209.48   23.70 
   2  -2  -6  180.78   22.00 
  -2   2  -6  191.68   23.10 
  -2   2  -6  150.38   21.40 
   2  -2  -6  236.38   33.50 
  -2  -2   6  187.48   23.20 
   2   2   6  205.88   24.10 
  -2  -2   6  206.88   28.70 
   2   2   6  223.68   24.30 
  -2  -2   6  159.68   28.90 
  -2   2  -6  253.37   24.90 
  -2  -2   6  218.78   27.00 
   2  -2  -6  214.98   24.20 
  -2  -2   6  210.88   23.30 
  -2  -2  -7   71.69   14.50 
  -2  -2  -7   97.69   13.20 
  -2   2   7  100.19   15.70 
   2   2  -7  112.09   17.00 
  -2  -2  -7   81.09   13.70 
   2  -2   7   63.49   13.70 
   2  -2   7  104.79   15.50 
  -2  -2  -7  104.09   15.70 
   2   2  -7  103.59   14.00 
  -2   2   7   82.29   14.70 
  -2   2  -7   91.69   12.90 
  -2   2  -7   84.19   14.30 
  -2  -2   7   85.89   14.70 
   2   2   7   82.59   15.30 
   2   2   7   81.69   15.60 
   2  -2  -7   58.19   14.80 
  -2  -2   7   81.89   19.00 
  -2  -2   7   64.89   14.60 
   2  -2  -7   58.49   12.70 
   2  -2  -7   65.89   15.70 
   2  -2  -7   66.49   14.60 
  -2   2  -7   73.19   14.70 
   2   2  -8  162.78   22.10 
  -2  -2  -8  188.88   24.10 
   2  -2   8  186.08   25.00 
  -2   2   8  194.78   24.70 
  -2  -2  -8  211.78   24.10 
   2   2  -8  170.08   24.80 
  -2  -2  -8  184.38   22.00 
  -2  -2  -8  221.48   24.50 
  -2   2   8  174.08   24.30 
   2   2  -8  154.98   23.80 
   2  -2   8  163.38   23.50 
  -2   2  -8  189.88   24.50 
  -2   2  -8  213.48   22.70 
  -2  -2   8  180.38   23.90 
  -2   2  -8  188.18   23.50 
   2   2   8  249.08   26.10 
  -2  -2   8  230.88   25.30 
   2  -2  -8  227.88   25.20 
   2  -2  -8  190.38   23.60 
   2  -2  -8  164.98   22.50 
  -2   2  -8  185.68   24.80 
   2   2   8  199.88   24.90 
   2  -2  -8  222.18   24.90 
   2   2  -9   23.30   12.50 
  -2  -2  -9   39.20   10.60 
   2  -2   9   28.70   12.00 
  -2   2   9   31.10   12.40 
  -2  -2  -9   58.29   10.20 
  -2  -2  -9   48.50   11.30 
   2   2  -9   67.19   10.70 
   2   2  -9   37.60   12.30 
   2  -2   9   40.50   12.10 
  -2   2   9   57.79   13.60 
  -2  -2  -9   39.00   10.70 
   2   2   9   58.89   13.10 
   2   2   9   37.10   12.20 
  -2   2  -9   28.20   11.50 
  -2   2  -9   67.19   10.30 
   2  -2  -9   68.99   11.30 
  -2  -2   9   30.90   12.70 
  -2  -2   9   47.60   13.10 
  -2  -2   9   13.60   10.70 
  -2   2  -9   48.20   10.70 
   2  -2  -9   46.50   11.50 
   2  -2  -9   40.60   13.00 
  -2  -2 -10    4.50    6.50 
   2  -2  10    7.50    8.00 
  -2  -2 -10    4.60    5.60 
  -2   2  10    4.90    9.00 
  -2   2  10   11.40    8.40 
   2   2 -10   13.60    7.80 
   2   2 -10   -5.30    6.10 
   2   2 -10    9.80    7.50 
  -2  -2 -10    3.90    5.80 
   2  -2  10   -7.40    7.20 
  -2   2  10   10.60    7.80 
  -2  -2 -10    7.00    6.40 
  -2  -2  10   -0.30    8.30 
  -2   2 -10    9.40    7.40 
   2   2  10    4.90    7.50 
  -2   2 -10    5.60    6.20 
  -2  -2  10   19.20    8.20 
  -2  -2  10    4.60    8.50 
  -2  -2  10   -1.50    7.10 
   2  -2 -10   -2.80    7.80 
   2   2  10   11.00    8.50 
   2  -2 -10    7.00    6.40 
  -2   2 -10   11.10    6.10 
   2  -2 -10   -5.10    6.70 
   3  -2   0 3400.66  334.87 
  -3  -2   0 3532.15  335.87 
  -3   2   0 3511.05  335.67 
  -3   2   0 3305.37  335.17 
   3  -2   0 3597.54  335.27 
   3   2   0 3445.06  335.67 
   3   2   0 3769.52  335.07 
  -3  -2   0 3453.55  335.17 
   3  -2   0 3451.15  336.27 
   3  -2   1  633.94   60.09 
  -3  -2  -1  657.83   61.09 
   3  -2   1  601.64   59.19 
   3   2  -1  611.34   59.89 
  -3   2   1  654.03   61.59 
   3  -2   1  618.14   60.99 
  -3  -2  -1  599.64   59.69 
  -3  -2  -1  566.04   59.09 
   3   2  -1  604.24   61.19 
  -3   2  -1  636.04   59.89 
  -3  -2   1  537.55   59.69 
   3  -2  -1  658.63   60.19 
   3  -2  -1  594.74   61.59 
   3   2   1  652.33   59.99 
  -3  -2   1  623.94   61.29 
   3   2  -2  806.12   74.69 
  -3  -2  -2  716.23   73.29 
   3  -2   2  749.23   74.89 
  -3  -2  -2  791.82   73.79 
   3   2  -2  748.73   76.09 
   3  -2  -2  779.82   74.79 
   3   2   2  723.43   73.69 
  -3   2  -2  811.72   74.09 
  -3  -2   2  761.62   76.19 
   3  -2  -2  740.63   76.49 
   3   2   2  775.82   74.79 
   3   2  -3  257.37   28.00 
  -3  -2  -3  227.78   25.90 
   3  -2   3  245.18   28.30 
   3   2  -3  263.17   30.80 
  -3  -2  -3  244.08   26.80 
  -3  -2  -3  265.07   26.60 
  -3  -2   3  277.97   32.10 
  -3   2  -3  254.57   26.80 
   3  -2  -3  267.17   31.30 
   3   2   3  280.37   28.10 
   3  -2  -3  274.57   28.30 
  -3   2  -3  257.07   27.50 
   3   2  -4   46.30   10.60 
   3   2  -4   42.80   14.80 
  -3  -2  -4   56.79    9.50 
  -3  -2  -4   39.90    9.40 
   3  -2   4   49.50   12.80 
   3  -2  -4   58.69   16.90 
  -3   2  -4   55.49    9.70 
   3  -2  -4   62.89   12.00 
  -3   2  -4   53.89   10.00 
  -3  -2   4   45.30   15.00 
   3   2   4   56.09   12.30 
   3   2  -5  818.42   81.89 
  -3  -2  -5  754.82   76.19 
   3  -2   5  808.62   78.69 
  -3   2   5  779.32   82.89 
   3   2  -5  759.92   77.49 
   3  -2  -5  770.42   81.19 
  -3   2  -5  748.13   76.69 
  -3  -2   5  845.02   82.19 
   3  -2  -5  734.93   77.59 
   3   2   5  789.12   78.09 
  -3   2  -5  701.33   76.19 
   3   2  -6  220.88   28.30 
  -3   2   6  188.18   35.70 
   3  -2   6  249.48   27.90 
   3   2  -6  215.18   26.80 
  -3   2   6  226.18   27.40 
   3  -2   6  226.58   28.80 
  -3  -2  -6  234.58   28.00 
  -3  -2  -6  228.38   27.80 
  -3  -2  -6  265.07   27.30 
  -3   2   6  252.37   28.20 
   3  -2   6  235.58   27.80 
  -3  -2  -6  233.28   27.40 
  -3  -2  -6  233.58   27.20 
  -3  -2  -6  228.68   26.30 
   3   2  -6  304.87   38.40 
   3  -2   6  296.87   33.00 
   3   2   6  215.58   28.00 
  -3  -2   6  249.48   39.30 
   3  -2  -6  285.27   36.20 
  -3   2  -6  282.87   27.60 
   3   2   6  286.87   27.80 
   3  -2  -6  267.57   28.60 
  -3   2  -6  230.88   28.10 
  -3  -2   6  201.18   27.80 
  -3  -2   6  275.27   27.70 
  -3   2  -6  235.78   27.80 
  -3  -2   6  284.07   31.00 
   3   2   6  225.38   29.00 
  -3  -2   6  269.57   28.30 
   3   2   6  240.88   31.20 
  -3   2  -6  210.98   26.70 
  -3   2  -6  269.17   30.30 
   3  -2  -6  258.57   28.50 
   3  -2  -6  226.88   26.80 
  -3   2  -6  234.98   26.20 
  -3  -2  -7  104.99   18.40 
   3  -2   7  135.99   18.30 
  -3  -2  -7  144.49   18.30 
   3  -2   7  157.88   20.50 
   3   2  -7  129.19   19.60 
   3  -2   7  120.89   22.50 
  -3   2   7  150.88   20.40 
   3   2  -7  143.69   18.20 
  -3  -2  -7  154.38   17.50 
  -3   2   7  123.49   19.30 
  -3  -2  -7  157.18   18.90 
  -3   2  -7  126.99   17.10 
   3  -2  -7  173.68   21.50 
   3  -2  -7  157.58   20.10 
  -3  -2   7  149.29   19.30 
   3   2   7  147.49   19.90 
  -3   2  -7  117.59   17.80 
   3   2   7  149.29   20.20 
  -3   2  -7  121.19   18.70 
  -3  -2   7  152.68   25.10 
   3  -2  -7  125.89   18.10 
  -3  -2   7  123.19   18.70 
  -3   2  -7  167.78   20.40 
  -3  -2   7  142.69   19.10 
  -3  -2  -8   85.89   14.80 
  -3  -2  -8   83.49   12.50 
  -3   2   8   68.59   15.60 
  -3   2   8   70.09   15.50 
  -3  -2  -8   63.59   13.30 
   3   2  -8  102.09   17.40 
   3  -2   8   65.69   14.50 
  -3  -2  -8   88.49   14.60 
   3   2  -8   61.09   13.60 
   3   2  -8   79.99   16.30 
   3   2   8   59.79   14.90 
  -3   2  -8   65.49   13.20 
   3  -2  -8   89.69   16.40 
  -3   2  -8   74.39   15.00 
   3  -2  -8  104.79   15.00 
  -3  -2   8   63.09   14.70 
   3  -2  -8   67.79   14.30 
   3   2   8  116.89   16.70 
   3  -2  -8   61.29   15.70 
  -3   2  -8   84.19   12.70 
  -3   2  -8   73.69   15.30 
  -3  -2   8  130.19   15.90 
  -3  -2  -9   21.50    8.40 
   3  -2   9   20.30   11.00 
   3   2  -9   23.30    9.20 
   3   2  -9   29.30   12.60 
  -3   2   9   13.10   10.40 
  -3   2   9   29.70   12.20 
   3  -2   9   14.80   11.10 
  -3  -2  -9   11.10    9.20 
   3   2  -9   46.00   12.60 
  -3  -2  -9   26.50    8.50 
  -3  -2  -9   15.20    9.00 
  -3  -2   9    7.10    9.60 
   3  -2  -9   19.70    9.60 
  -3   2  -9   21.30    8.30 
   3  -2  -9   25.70    9.70 
  -3   2  -9   14.70    8.40 
   3   2   9    3.10    9.30 
  -3   2  -9   25.20   11.00 
   3   2   9   25.70   11.40 
  -3  -2   9   17.10   11.10 
  -3  -2   9   15.40   11.80 
   3  -2  -9   -0.20   11.40 
  -3  -2 -10   11.60    6.80 
  -3  -2 -10   -0.90    5.20 
   3   2 -10   11.80    6.90 
  -3  -2 -10   18.70    6.60 
   3  -2  10   11.50    7.50 
  -3   2  10    7.40    7.50 
   3  -2  10    8.70    7.60 
  -3   2  10    0.10    8.00 
   3   2 -10    7.20    8.10 
   3   2 -10    9.10    7.90 
  -3   2  10   31.00    9.20 
  -3   2 -10    1.70    5.50 
   3   2  10   21.20    8.00 
  -3   2 -10   13.30    7.60 
   3  -2 -10    7.10    6.70 
   3  -2 -10   11.50    8.00 
  -3  -2  10   18.00    8.10 
   3   2  10    5.70    6.80 
  -3  -2  10    7.70    7.10 
  -3   2 -10   11.40    5.70 
  -3  -2  10    0.60    6.70 
  -3  -2  10   15.50    9.00 
   4   2   0  165.48   16.60 
   4   2   0  141.69   17.60 
  -4  -2   0  145.69   15.70 
  -4   2   0  153.08   18.40 
   4   2   0  153.88   15.20 
  -4   2   0  131.59   15.50 
   4  -2   0  152.38   19.80 
   4  -2   0  159.58   16.50 
  -4  -2   0  155.08   19.30 
  -4  -2  -1  576.94   56.19 
  -4  -2  -1  524.25   54.29 
  -4   2   1  570.14   56.49 
   4   2  -1  535.15   54.69 
   4  -2   1  598.04   55.09 
   4  -2   1  540.95   53.89 
   4  -2   1  564.84   56.19 
   4   2  -1  554.84   56.49 
   4   2   1  500.75   54.29 
  -4  -2   1  557.64   56.69 
   4  -2  -1  605.04   55.09 
   4   2   1  589.14   55.09 
   4  -2  -1  572.84   57.39 
  -4   2  -1  566.94   54.99 
   4   2  -2 2126.09  198.28 
   4  -2   2 1985.60  198.38 
  -4   2   2 2040.30  199.68 
   4   2  -2 2027.60  199.78 
  -4  -2  -2 2071.79  199.18 
   4  -2  -2 2042.90  200.08 
  -4   2  -2 2054.79  197.48 
  -4  -2   2 2060.09  199.58 
   4  -2  -2 2110.59  198.38 
   4   2   2 2039.20  198.38 
   4   2  -3  130.79   16.90 
  -4  -2  -3  123.19   13.80 
   4  -2   3  122.49   16.50 
   4   2  -3  116.89   20.40 
  -4   2   3  109.99   18.60 
  -4  -2  -3  119.99   15.10 
  -4   2  -3  104.79   14.70 
   4   2   3  125.39   16.60 
   4  -2  -3  124.69   16.70 
  -4  -2   3  113.39   17.80 
   4  -2  -3  115.99   20.10 
  -4   2  -3  106.29   14.10 
  -4   2   4  981.40   94.99 
  -4  -2  -4  914.41   90.19 
   4   2  -4  917.81   94.09 
   4  -2   4  912.71   91.49 
   4   2  -4  859.71   90.89 
   4  -2  -4  936.11   91.19 
   4   2   4  887.91   91.19 
  -4   2  -4  854.21   89.69 
   4  -2  -4  944.21   94.29 
  -4  -2   4 1016.10   94.49 
  -4   2  -4  915.81   90.29 
   4   2  -5  159.18   22.10 
   4   2  -5  184.48   29.90 
  -4   2   5  174.08   28.50 
   4  -2   5  173.08   24.00 
  -4  -2  -5  163.58   20.50 
   4   2   5  149.49   22.60 
  -4  -2   5  149.49   25.50 
   4  -2  -5  178.48   30.30 
  -4   2  -5  186.68   21.60 
   4  -2  -5  146.19   22.50 
  -4   2   6   63.79   12.80 
   4  -2   6   86.59   13.40 
  -4  -2  -6   46.20   10.50 
   4   2  -6   72.49   14.00 
   4   2  -6   92.99   22.60 
  -4  -2  -6   63.29   11.60 
  -4   2   6   22.50   20.70 
   4  -2   6   56.09   14.40 
   4  -2   6   78.09   17.80 
   4  -2   6   57.29   12.00 
  -4  -2  -6   65.89   12.30 
  -4  -2  -6   52.79   12.40 
   4   2  -6   59.79   11.40 
  -4  -2  -6   62.89   12.40 
  -4   2  -6   87.39   11.20 
   4   2   6   60.29   13.80 
  -4  -2   6   74.59   12.30 
  -4  -2   6   50.59   11.80 
   4  -2  -6   53.09   13.80 
  -4   2  -6   80.59   12.50 
  -4   2  -6   78.19   12.80 
  -4   2  -6   72.19   12.00 
  -4   2  -6   64.79   14.00 
   4   2   6   52.19   15.60 
  -4  -2   6   81.09   13.90 
   4  -2  -6   76.19   11.20 
  -4  -2   6   57.49   16.20 
   4   2   6   57.49   12.80 
   4  -2  -6   81.99   21.70 
  -4  -2   6   45.60   19.30 
   4  -2  -6   78.49   14.20 
   4   2   6   50.39   15.70 
  -4   2  -6   59.89   13.30 
  -4   2   7   76.49   13.90 
  -4  -2  -7   31.60   11.30 
   4   2  -7   60.09   12.20 
   4  -2   7   46.70   13.60 
   4   2  -7   41.80   15.20 
  -4  -2  -7   45.50   11.50 
   4  -2   7   54.89   13.10 
  -4   2   7   31.90   12.30 
  -4   2   7   34.00   12.30 
   4  -2   7   54.49   14.10 
  -4  -2  -7   37.00   12.00 
  -4  -2  -7   62.09   10.50 
   4  -2   7   45.40   12.30 
  -4   2  -7   74.49   13.90 
   4  -2  -7   58.89   15.80 
  -4   2  -7   56.49   10.20 
   4   2   7   35.30   15.10 
   4   2   7   50.59   13.40 
  -4   2  -7   40.00   12.80 
   4  -2  -7   37.70   11.80 
  -4  -2   7   46.70   12.50 
   4   2   7   37.80   12.40 
  -4  -2   7   76.89   14.20 
   4  -2  -7   48.40   13.30 
  -4   2  -7   36.00   10.60 
  -4  -2   7   47.70   12.20 
  -4   2  -7   39.40   11.90 
  -4  -2  -8  323.87   31.50 
  -4   2   8  305.57   32.50 
   4  -2   8  276.07   31.80 
  -4  -2  -8  271.47   31.00 
   4  -2   8  305.87   32.60 
  -4  -2  -8  261.47   29.60 
  -4   2   8  263.47   33.00 
  -4  -2  -8  288.57   31.70 
   4   2  -8  270.47   32.10 
   4   2  -8  290.67   31.60 
   4  -2  -8  285.37   34.00 
  -4   2  -8  254.77   31.70 
   4  -2  -8  271.47   32.20 
  -4  -2   8  244.28   31.10 
  -4   2  -8  277.17   30.70 
  -4   2  -8  258.07   30.80 
   4   2   8  236.88   31.30 
  -4  -2   8  292.27   32.10 
   4  -2  -8  280.67   32.00 
  -4   2  -8  328.57   32.70 
   4   2   8  253.47   32.60 
  -4  -2   8  254.07   32.00 
   4  -2  -8  300.67   31.50 
  -4   2  -8  283.77   29.70 
  -4  -2  -9  124.09   15.70 
  -4  -2  -9  131.49   17.10 
   4  -2   9  166.98   18.50 
  -4  -2  -9  111.09   16.60 
   4  -2   9  134.09   18.80 
  -4  -2  -9   99.99   16.40 
  -4   2   9  124.19   18.40 
  -4   2   9  149.39   18.70 
   4   2  -9  147.99   19.90 
   4   2  -9  131.49   19.40 
   4   2  -9  156.08   17.50 
  -4  -2   9  136.09   17.90 
  -4   2  -9  143.39   18.60 
  -4  -2   9  137.99   18.60 
   4  -2  -9  139.99   17.60 
  -4  -2   9  156.98   18.70 
  -4   2  -9  107.09   16.00 
   4  -2  -9  130.69   17.60 
   4  -2  -9  156.08   19.80 
  -4   2  -9  132.89   16.00 
   4   2   9  138.49   18.70 
   4  -2  -9  130.89   17.60 
   4   2   9  129.89   17.80 
  -4   2  10   48.60    8.90 
   4  -2  10   44.00    9.10 
  -4   2  10   39.80   10.10 
   4  -2  10   56.39    9.20 
  -4  -2 -10   19.10    7.20 
   4  -2  10   49.99    9.80 
  -4   2  10   49.40    9.40 
   4   2 -10   32.80    9.00 
  -4  -2 -10   32.80    7.80 
  -4  -2 -10   26.60    7.50 
   4   2 -10   43.30    9.30 
  -4   2  10   41.10    9.00 
   4   2 -10   57.09    8.90 
   4   2  10   45.80    9.30 
   4   2  10   32.70    8.50 
  -4   2 -10   61.69    9.20 
   4  -2 -10   51.69    8.50 
  -4  -2  10   39.90    9.20 
  -4  -2  10   49.80   10.20 
  -4  -2  10   48.60    8.90 
   4  -2 -10   62.19   10.40 
  -4  -2  10   36.00    8.10 
  -4   2 -10   34.70    7.30 
  -4   2 -10   40.60    7.10 
   5   2   0 6649.23  652.03 
   5   2   0 7236.78  652.73 
   5  -2   0 6929.91  654.03 
  -5   2   0 6910.11  653.23 
   5  -2   0 7275.77  652.63 
   5   2   0 6514.55  653.23 
  -5  -2   0 6051.39  652.03 
  -5  -2   0 6905.11  653.53 
  -5   2   1 1968.50  188.58 
  -5  -2  -1 1840.12  186.78 
   5   2  -1 1942.61  188.78 
  -5  -2  -1 2017.20  188.48 
   5  -2   1 2062.09  187.58 
   5  -2   1 1803.52  186.48 
   5  -2   1 1979.50  188.58 
   5   2  -1 2006.70  187.18 
  -5   2  -1 1772.52  186.58 
   5  -2  -1 2068.09  187.38 
   5   2   1 2053.99  187.58 
  -5  -2   1 2006.90  188.78 
   5   2   1 1731.83  187.18 
  -5   2  -1 1988.20  187.78 
   5  -2  -1 1972.60  189.38 
   5  -2   2  246.18   28.40 
   5   2  -2  262.37   27.70 
  -5  -2  -2  255.37   27.70 
  -5   2   2  275.87   32.50 
   5   2  -2  277.17   31.20 
  -5  -2  -2  240.08   26.90 
  -5   2  -2  252.07   28.00 
   5   2   2  264.77   28.30 
  -5   2  -2  248.28   25.80 
  -5  -2   2  269.07   31.20 
   5  -2  -2  264.27   31.90 
   5  -2  -2  274.17   28.00 
  -5  -2  -3   18.10    8.70 
   5   2  -3   23.40   12.40 
   5  -2   3   30.50   10.90 
  -5   2   3   24.80   13.00 
   5   2  -3   36.00    8.90 
   5  -2  -3   36.20   15.40 
  -5   2  -3   34.10    6.00 
   5  -2  -3   30.20    9.70 
  -5  -2   3   27.10   12.90 
  -5   2  -3   36.40    9.80 
   5   2   3   33.80   10.50 
  -5  -2  -4  285.87   27.60 
   5   2  -4  211.08   27.80 
   5  -2   4  238.58   29.50 
  -5   2   4  237.58   36.50 
   5   2  -4  232.98   32.80 
  -5   2  -4  244.88   27.90 
   5  -2  -4  248.08   34.40 
   5  -2  -4  224.08   28.40 
   5   2   4  246.78   29.20 
  -5  -2   4  260.67   35.30 
   5  -2   5   16.40   13.20 
  -5  -2  -5   14.00   10.40 
   5   2  -5   46.10   19.30 
  -5   2   5   22.10   17.90 
   5   2   5   10.90   12.60 
   5  -2  -5   43.90   17.80 
  -5  -2   5   19.30   15.50 
  -5   2  -5    5.50    9.80 
  -5   2   6  -16.80   17.20 
  -5  -2  -6   15.00    9.80 
   5  -2   6   -3.80    8.80 
   5  -2   6    9.60   15.20 
  -5  -2  -6   19.20    7.80 
  -5  -2  -6    1.90    8.80 
   5   2  -6    9.00    8.70 
   5  -2   6    8.80    9.60 
  -5  -2  -6   -8.80    9.50 
  -5   2   6    0.50    9.40 
  -5  -2  -6   -2.10    8.50 
   5   2  -6   22.70   12.50 
   5   2  -6   40.20   19.30 
   5  -2   6  -24.30   11.70 
   5  -2   6    5.70   10.90 
  -5   2  -6   -6.20   10.00 
  -5  -2   6    3.20   10.60 
  -5  -2   6  -17.70   14.20 
   5   2   6   10.90   10.00 
   5  -2  -6   35.70   18.70 
  -5   2  -6    4.30   11.40 
   5   2   6    0.80    9.60 
  -5   2  -6   10.10    8.80 
  -5   2  -6   21.30    8.20 
  -5  -2   6   -1.50    9.90 
   5   2   6   -6.40   12.40 
   5  -2  -6   10.00    9.70 
   5   2   6    7.40   14.60 
  -5  -2   6   16.50    9.50 
  -5   2  -6   -4.30    7.20 
  -5   2  -6   11.50    9.10 
   5  -2  -6    4.10   12.50 
  -5  -2   6   10.90   17.50 
  -5  -2  -7   -6.70    8.60 
  -5  -2  -7   18.50   11.20 
  -5  -2  -7    4.30   12.50 
  -5   2   7   -4.60   10.60 
   5   2  -7    2.10    9.80 
  -5   2   7  -14.90   11.00 
   5  -2   7    2.70   10.80 
   5  -2   7    9.40   12.40 
   5  -2   7    5.30   10.30 
  -5  -2  -7    2.00    8.30 
   5   2  -7    4.90   12.70 
  -5  -2  -7   18.90   10.20 
   5  -2   7    0.00   13.50 
  -5   2   7    4.00   11.40 
   5   2  -7   18.90   14.10 
   5   2   7    7.90   11.20 
  -5  -2   7   10.90   10.30 
  -5   2  -7   -4.20   10.70 
   5  -2  -7   12.60   10.80 
  -5   2  -7    2.90   11.10 
   5  -2  -7   20.80   13.00 
  -5  -2   7   -3.90    9.80 
  -5   2  -7   11.70    8.50 
  -5  -2   7   26.30   12.10 
   5   2   7   12.70   14.80 
   5  -2  -7   23.90   14.90 
  -5   2  -7   19.60    9.70 
  -5   2  -7   -8.70    8.30 
   5   2   7    0.80   10.50 
  -5  -2  -8  196.38   22.60 
  -5  -2  -8  213.58   25.40 
   5  -2   8  222.88   25.20 
  -5   2   8  194.08   26.00 
   5  -2   8  225.48   26.20 
   5   2  -8  203.28   26.60 
  -5   2   8  234.18   25.60 
   5   2  -8  181.28   23.40 
  -5  -2  -8  184.48   23.50 
   5  -2   8  167.58   24.70 
  -5  -2  -8  201.98   24.10 
  -5   2   8  225.08   25.80 
   5  -2  -8  229.08   25.50 
  -5  -2   8  169.58   23.70 
   5   2   8  240.18   25.90 
  -5  -2   8  264.87   26.40 
  -5   2  -8  239.68   23.30 
   5   2   8  186.48   24.20 
   5  -2  -8  246.78   25.00 
   5   2   8  155.78   25.20 
   5  -2  -8  142.89   23.90 
  -5   2  -8  224.88   25.30 
   5  -2  -8  249.28   27.20 
   5   2   8  163.58   24.30 
  -5   2  -8  201.98   23.40 
  -5   2  -8  194.98   23.90 
  -5  -2   8  211.88   26.10 
  -5   2  -8  158.88   22.60 
   5   2  -9    0.70   12.00 
  -5  -2  -9   16.30    7.60 
   5  -2   9    3.70    9.70 
  -5   2   9   20.30   10.30 
  -5   2   9   30.40   10.70 
   5  -2   9   32.50    9.80 
   5   2  -9   11.30    8.50 
   5   2  -9    9.70   11.50 
  -5  -2  -9   14.70    8.80 
  -5  -2  -9   23.90    9.40 
  -5  -2   9   28.70   10.10 
  -5   2  -9   20.80    7.90 
   5   2   9   12.00   11.30 
   5  -2  -9    3.60   11.90 
   5   2   9   28.60    9.40 
  -5  -2   9    9.90   11.40 
   5  -2  -9   27.60   10.00 
  -5   2  -9   12.60   10.40 
  -5   2  -9   15.20    8.40 
  -5   2  -9   23.20    7.50 
   5  -2  -9   14.10    9.30 
  -5  -2   9   29.50    9.70 
   5  -2  -9    6.20    9.60 
  -5  -2   9    3.90    8.40 
   5   2   9   13.20   10.00 
   5   2 -10    9.00    7.50 
   5   2 -10   13.50    6.20 
  -5   2  10   21.40    6.90 
   5  -2  10   17.20    6.60 
   5  -2  10   10.70    6.80 
  -5  -2 -10   15.70    5.90 
  -5  -2 -10   22.80    6.60 
  -5  -2 -10   12.20    5.40 
   5   2 -10   13.90    7.10 
  -5   2  10   16.00    8.40 
  -5   2  10    9.20    7.00 
   5   2  10    7.00    6.70 
  -5  -2  10   30.50    8.30 
   5  -2 -10   21.70    8.60 
  -5  -2  10    7.50    5.80 
  -5   2 -10   16.70    6.50 
   5  -2 -10   29.80    7.10 
  -5  -2  10   21.40    7.20 
   6   2   0  120.49   13.80 
   6  -2   0  128.79   14.20 
   6   2   0   93.99   15.90 
   6  -2   0  113.79   18.70 
  -6   2   0   91.39   11.90 
  -6  -2   0   90.49   14.60 
  -6   2   0   97.79   14.10 
   6   2   0   92.09   10.90 
   6   2  -1   79.09   14.70 
  -6  -2  -1   76.69   10.30 
  -6  -2  -1   59.59    8.20 
   6  -2   1   50.09    7.60 
   6  -2   1   69.59   13.50 
   6  -2   1   73.59   10.90 
  -6  -2  -1   62.29   12.10 
  -6   2   1   72.09   13.10 
   6   2  -1   64.29    9.10 
  -6   2  -1   62.69    7.60 
  -6   2  -1   69.29   11.10 
   6  -2  -1   61.99    9.90 
  -6  -2   1   49.99   11.60 
   6  -2  -1   75.39   16.10 
   6   2   1   59.79   10.20 
   6   2   1   77.59   10.90 
  -6   2  -1   60.19   10.50 
   6  -2  -1   87.79   10.80 
   6   2  -2  241.98   25.30 
  -6  -2  -2  215.18   24.00 
   6   2  -2  227.98   30.20 
   6  -2   2  224.58   26.50 
  -6  -2  -2  245.28   25.60 
  -6   2   2  229.98   30.70 
   6  -2  -2  226.08   31.10 
  -6  -2   2  255.07   30.60 
   6   2   2  228.38   26.50 
   6  -2  -2  224.98   25.80 
  -6   2  -2  225.78   25.90 
   6   2  -3  130.79   22.90 
   6   2  -3  122.79   16.80 
  -6   2   3   99.19   18.80 
  -6  -2  -3  112.29   15.30 
   6  -2   3  116.99   17.60 
  -6  -2  -3   96.59   13.70 
  -6   2  -3  128.99   16.00 
   6  -2  -3  125.09   22.70 
   6  -2  -3   91.49   15.00 
  -6  -2   3   75.59   16.70 
   6   2   3  102.29   16.70 
   6   2  -4   34.80   10.20 
  -6  -2  -4   44.90   11.30 
   6   2  -4   58.99   19.30 
   6  -2   4   45.50   13.80 
  -6   2   4   27.20   16.30 
  -6   2  -4   42.70   11.80 
   6   2   4   32.60   12.90 
  -6  -2   4   29.20   15.00 
   6  -2  -4   37.00   10.70 
   6  -2  -4   51.69   19.20 
  -6   2   5  106.99   25.10 
   6  -2   5  104.69   20.60 
  -6  -2  -5   93.59   15.00 
  -6  -2  -5  138.39   15.40 
  -6  -2  -5   76.99   16.30 
  -6  -2  -5   86.69   14.00 
   6   2  -5  115.59   24.70 
   6  -2   5  117.69   18.70 
  -6  -2  -5  130.59   17.50 
   6  -2   5  116.09   15.80 
   6  -2  -5   95.79   14.90 
  -6   2  -5  105.89   15.60 
  -6  -2   5  108.29   15.60 
   6   2   5   89.89   19.40 
  -6  -2   5   78.49   21.10 
  -6   2  -5  112.79   15.00 
   6  -2  -5   97.49   17.00 
   6   2   5   94.39   19.30 
  -6   2  -5  120.29   17.90 
  -6   2  -5  102.19   13.30 
  -6  -2   5  125.09   19.30 
  -6   2  -5  121.59   15.10 
   6  -2  -5  146.39   28.40 
   6  -2   6   80.39   15.00 
  -6   2   6   71.19   13.70 
  -6  -2  -6   73.09   13.10 
  -6  -2  -6   55.19   11.60 
   6   2  -6   63.29   16.40 
   6  -2   6   74.79   14.90 
   6  -2   6   72.69   20.00 
   6   2  -6  100.79   24.50 
   6  -2   6   66.99   17.00 
  -6   2   6   70.19   25.30 
  -6  -2  -6   66.49   14.70 
  -6  -2  -6   97.09   13.30 
  -6  -2  -6   55.79   13.20 
   6   2  -6   70.19   12.80 
   6   2   6   99.89   20.00 
  -6  -2   6  103.69   17.50 
  -6   2  -6   67.29   13.00 
  -6  -2   6   78.39   15.90 
  -6  -2   6   98.09   24.30 
   6  -2  -6  104.69   17.20 
  -6   2  -6   91.79   13.30 
   6  -2  -6   88.29   14.30 
   6  -2  -6   87.99   24.00 
   6   2   6  114.49   19.00 
  -6   2  -6   80.69   12.70 
  -6  -2   6   79.19   13.40 
  -6   2  -6   73.29   14.20 
  -6  -2   6   53.79   13.00 
  -6  -2   6   87.09   18.90 
  -6   2  -6   63.79   11.50 
  -6   2  -6   71.89   16.00 
   6  -2   7  123.69   19.60 
   6   2  -7  138.59   20.80 
  -6  -2  -7  127.69   18.00 
   6  -2   7  141.19   19.80 
  -6  -2  -7  124.69   18.30 
  -6   2   7   87.49   19.20 
   6  -2   7  145.29   21.90 
   6   2  -7  160.38   22.70 
  -6   2   7  145.59   19.90 
   6   2  -7  175.08   19.30 
  -6  -2  -7  172.18   22.10 
  -6  -2  -7  138.49   17.80 
  -6  -2  -7  140.39   20.10 
  -6   2   7  145.29   19.70 
  -6  -2   7  146.19   21.00 
   6   2   7  149.39   19.80 
  -6   2  -7  129.79   18.40 
  -6   2  -7  106.99   20.10 
  -6   2  -7  150.88   17.50 
  -6  -2   7  105.89   17.90 
   6  -2  -7  136.89   20.90 
  -6   2  -7  127.39   16.50 
   6  -2  -7  141.19   21.70 
  -6  -2   7  126.99   18.30 
   6   2   7  162.08   23.10 
   6  -2  -7  107.69   18.60 
  -6   2  -7  156.68   18.60 
  -6   2  -7  142.09   19.30 
  -6   2   8   41.50   13.00 
  -6  -2  -8   52.49   11.80 
  -6  -2  -8   52.79   11.90 
   6   2  -8   42.90   12.30 
  -6   2   8   60.89   13.00 
   6  -2   8   63.49   15.10 
   6  -2   8   54.79   14.50 
   6  -2   8   61.69   14.50 
  -6   2   8   62.09   14.40 
   6   2  -8   59.99   15.80 
  -6  -2  -8   80.69   13.30 
   6  -2   8   51.49   13.10 
  -6   2  -8   59.39   10.80 
  -6  -2   8   39.40   11.40 
   6  -2  -8   42.30   13.00 
   6  -2  -8   52.49   13.70 
   6  -2  -8   56.29   16.80 
   6   2   8   37.30   15.00 
   6   2   8   66.69   15.20 
   6   2   8   62.99   16.20 
  -6   2  -8   59.49   13.90 
  -6   2  -8   30.30   10.80 
  -6   2  -8   48.90   12.00 
  -6   2  -8   56.19   10.40 
  -6  -2   8   75.49   14.80 
   6   2   8   51.69   13.00 
  -6  -2   8   28.30   13.20 
  -6  -2   8   48.60   12.50 
   6  -2  -8   54.09   13.90 
  -6   2   9   21.50   11.20 
   6   2  -9   25.40    8.80 
  -6  -2  -9   26.00    9.10 
   6   2  -9   25.20   12.10 
  -6  -2  -9   28.40    8.70 
  -6  -2  -9   32.00    8.50 
  -6   2   9   42.50   10.00 
  -6   2   9   14.20    9.60 
   6   2  -9   25.00   11.60 
   6  -2   9   17.60    9.90 
  -6   2  -9   22.80    7.40 
  -6  -2   9   25.50   10.10 
   6   2   9   10.90    9.40 
   6  -2  -9   26.40    9.60 
  -6   2  -9   10.40    7.10 
  -6   2  -9   21.50    9.80 
  -6  -2   9    8.70    7.70 
  -6   2  -9   14.10    7.80 
   6  -2  -9   14.90   11.50 
   6  -2  -9   21.40    9.70 
  -6  -2   9   21.40    9.00 
  -6  -2   9   20.20   11.50 
   6   2   9   24.20   11.30 
   6  -2  -9   10.10   12.20 
  -6   2  10    6.10    7.30 
  -6  -2 -10    7.10    5.30 
   6   2 -10    0.30   10.90 
   6   2 -10    8.70    5.30 
   6   2 -10   11.50    6.90 
   6  -2  10    9.30    6.80 
  -6  -2 -10   -0.20    7.50 
  -6   2  10   -1.00    5.70 
  -6  -2 -10    5.90    7.10 
  -6   2 -10   -0.10    5.90 
  -6  -2  10    2.80    7.00 
   6  -2 -10   13.80    7.20 
   6  -2 -10    0.40    5.90 
  -7   2   0  212.38   24.70 
   7   2   0  184.18   24.90 
   7   2   0  210.88   22.60 
  -7  -2   0  199.08   26.60 
   7  -2   0  199.18   27.30 
   7  -2   0  212.28   23.20 
  -7   2   0  207.58   26.00 
   7  -2   1  719.13   70.79 
  -7  -2  -1  703.93   70.39 
   7   2  -1  720.43   73.09 
   7   2  -1  695.43   69.79 
   7   2  -1  730.73   70.39 
  -7  -2  -1  765.92   72.89 
  -7   2   1  684.63   72.89 
   7  -2   1  679.53   72.39 
   7  -2  -1  661.83   70.19 
   7   2   1  738.83   70.89 
   7  -2  -1  741.13   70.29 
  -7   2  -1  705.63   71.69 
  -7   2  -1  695.03   70.59 
   7  -2  -1  728.23   74.29 
  -7  -2   1  748.83   72.89 
  -7  -2  -2  139.59   16.50 
  -7   2   2  126.19   20.10 
   7  -2   2  130.59   17.70 
   7   2  -2  122.19   21.60 
   7   2  -2  121.19   16.20 
   7   2   2  121.19   17.50 
  -7  -2   2   96.79   18.20 
   7  -2  -2  150.98   24.80 
   7  -2  -2   94.79   15.40 
  -7   2  -2  112.49   16.10 
   7   2  -3  297.27   32.70 
   7   2  -3  298.07   38.90 
  -7  -2  -3  296.87   33.00 
  -7   2   3  319.67   40.00 
   7  -2   3  288.27   34.70 
   7  -2  -3  285.37   33.10 
   7  -2  -3  323.97   40.30 
   7   2   3  269.77   34.40 
  -7  -2   3  312.47   38.30 
  -7   2  -3  310.67   33.40 
   7  -2   4  479.75   51.69 
  -7   2   4  516.85   57.39 
   7   2  -4  498.55   56.19 
   7   2  -4  466.75   49.90 
  -7  -2  -4  493.95   49.80 
   7   2   4  445.26   51.49 
   7  -2  -4  446.36   50.19 
  -7   2  -4  462.95   49.90 
  -7  -2   4  476.55   55.09 
   7  -2  -4  496.45   56.39 
   7   2  -5  296.97   40.70 
   7  -2   5  268.87   31.40 
   7  -2   5  274.57   35.70 
   7  -2   5  314.37   33.70 
  -7  -2  -5  283.87   33.30 
   7  -2   5  293.67   31.40 
  -7   2   5  303.87   44.20 
  -7  -2  -5  274.47   30.90 
  -7  -2  -5  286.17   30.50 
  -7   2   5  300.37   32.70 
   7   2  -5  269.07   30.40 
  -7   2   5  282.57   31.00 
   7  -2   5  249.18   35.10 
  -7  -2  -5  317.17   30.20 
  -7  -2  -5  232.28   32.40 
  -7  -2   5  274.37   30.60 
   7  -2  -5  293.37   31.10 
  -7  -2   5  256.07   31.00 
   7   2   5  263.47   33.00 
  -7   2  -5  279.77   30.90 
  -7  -2   5  296.77   35.10 
   7  -2  -5  309.57   41.00 
   7   2   5  241.18   35.00 
  -7  -2   5  293.57   33.00 
  -7   2  -5  229.98   28.90 
  -7   2  -5  288.07   33.20 
   7  -2  -5  286.87   33.20 
  -7   2  -5  307.27   30.00 
   7  -2  -5  333.77   33.40 
  -7   2  -5  287.67   31.00 
  -7   2  -5  267.37   29.80 
  -7  -2   5  269.37   41.70 
  -7  -2   5  265.17   33.50 
  -7   2   6   81.09   14.70 
   7   2  -6   66.39   13.50 
   7   2  -6   36.20   16.10 
   7  -2   6   65.79   14.90 
  -7  -2  -6   76.59   13.60 
  -7  -2  -6   88.19   16.60 
  -7  -2  -6  100.09   14.00 
   7  -2   6   86.59   15.10 
  -7  -2  -6  110.69   14.20 
   7  -2   6  110.29   18.20 
   7   2   6  100.09   19.70 
   7  -2  -6   70.69   16.60 
  -7   2  -6   71.79   14.00 
  -7  -2   6   67.59   15.90 
  -7  -2   6   78.99   19.50 
  -7   2  -6   88.79   18.10 
   7  -2  -6   60.59   14.10 
  -7   2  -6   73.99   12.20 
  -7   2  -6   74.69   11.80 
  -7  -2   6   81.19   13.60 
  -7  -2   6   89.39   18.20 
  -7   2  -6   62.19   14.10 
  -7   2  -6   86.19   13.70 
   7  -2   7    9.00   12.00 
  -7  -2  -7   34.60   10.40 
   7  -2   7   36.80   14.90 
   7   2  -7   24.40   14.50 
   7   2  -7    5.10   10.80 
   7  -2   7   13.80   13.50 
  -7  -2  -7   21.50   10.30 
  -7   2   7    9.00   13.20 
  -7  -2  -7   41.40   14.30 
   7   2  -7   21.30   15.70 
  -7  -2  -7   29.20   11.50 
  -7   2   7   23.70   12.00 
  -7   2  -7   28.90   10.30 
   7  -2  -7   13.60   14.50 
  -7  -2   7   20.40   10.10 
  -7   2  -7   19.00   10.70 
   7  -2  -7   22.90   15.10 
   7   2   7   20.40   14.00 
  -7   2  -7   16.60    8.70 
  -7  -2   7    6.60   14.00 
  -7   2  -7   19.90   14.10 
   7   2   7   22.60   17.30 
  -7   2  -7   14.80    9.40 
  -7   2  -7   33.80   12.50 
   7  -2  -7   13.90   12.40 
  -7   2   8   72.99   13.70 
   7   2  -8   40.60   15.30 
   7  -2   8   23.70   12.20 
  -7   2   8   65.69   14.70 
  -7  -2  -8   44.20   12.10 
  -7  -2  -8   55.69   11.50 
   7   2  -8   64.99   12.50 
  -7  -2  -8   50.79   11.50 
   7  -2   8   51.49   15.00 
  -7   2   8   46.70   13.10 
   7  -2   8   47.70   14.20 
  -7  -2   8   73.99   14.50 
   7  -2  -8   73.09   17.10 
  -7  -2   8   58.19   13.90 
  -7   2  -8   48.80   12.50 
   7  -2  -8   58.99   13.10 
  -7   2  -8   59.39   11.80 
  -7   2  -8   42.20   11.30 
   7   2   8   86.19   16.90 
  -7  -2   8   51.19   11.20 
   7  -2  -8   38.20   13.70 
   7   2   8   62.39   13.70 
   7   2   8   54.89   14.80 
  -7  -2   8   40.50   13.80 
  -7   2  -8   64.69   10.30 
  -7   2  -8   56.29   10.40 
  -7   2   9   31.70    9.90 
   7   2  -9   45.00    9.00 
  -7  -2  -9   32.20    8.00 
   7  -2   9   34.60   10.30 
   7   2  -9   38.50   11.40 
  -7   2   9   27.50   10.20 
  -7  -2  -9   34.50    8.50 
  -7  -2  -9   23.10    8.70 
   7  -2   9   17.50   10.20 
  -7   2   9   16.60   10.10 
   7   2  -9   28.00   11.70 
  -7   2  -9   39.60    8.90 
   7  -2  -9   33.70    9.90 
  -7  -2   9    9.20   10.60 
  -7   2  -9   40.70    9.50 
   7   2   9   18.00   10.80 
   7  -2  -9   32.50    9.60 
  -7  -2   9   19.50    9.80 
   7   2   9   28.90   10.40 
   7  -2  -9   49.99   12.20 
   7   2   9   39.70   10.20 
  -7   2  -9   42.20   11.50 
  -7  -2   9   21.00    7.30 
  -7   2  10    6.20    9.40 
  -7  -2  10    8.70    8.30 
  -8   2   0 3118.19  310.77 
   8  -2   0 3397.36  311.37 
  -8  -2   0 2904.21  310.47 
   8   2   0 3140.59  312.47 
  -8  -2   0 3477.05  313.07 
   8  -2   0 3195.58  313.47 
  -8   2   0 3155.88  312.27 
   8   2   0 3472.35  311.37 
   8   2  -1  113.09   20.10 
   8  -2   1  106.39   19.00 
   8   2  -1  111.69   14.60 
  -8  -2  -1  107.69   14.30 
   8  -2   1  107.59   15.80 
  -8  -2  -1   99.59   17.80 
  -8   2   1   91.09   17.00 
  -8   2  -1   93.39   15.50 
   8   2   1  101.49   15.10 
   8  -2  -1  115.49   15.10 
  -8   2  -1  117.89   15.40 
   8  -2  -1   92.89   21.70 
  -8  -2   1   79.79   16.50 
  -8  -2  -2   18.10    9.20 
  -8   2   2   23.00   12.80 
   8  -2   2   17.90   10.60 
   8   2  -2   14.70    7.20 
   8   2  -2   30.60   16.20 
  -8  -2   2   12.70   12.10 
  -8   2  -2   26.40   10.20 
   8  -2  -2   13.30    8.70 
   8  -2  -2   12.70    8.40 
   8   2   2   14.00   10.60 
   8  -2  -2   18.70   17.30 
   8   2  -3  254.67   26.10 
  -8  -2  -3  212.38   26.70 
   8   2  -3  223.58   33.00 
  -8   2   3  229.48   34.00 
   8  -2   3  208.28   28.70 
  -8   2  -3  219.48   27.30 
   8   2   3  199.58   28.50 
  -8  -2   3  245.48   33.00 
   8  -2  -3  171.58   26.20 
   8  -2  -3  235.28   34.60 
   8  -2   4   17.50    9.60 
   8  -2   4  -14.70   18.10 
   8   2  -4   35.50   18.90 
   8   2  -4   46.30   11.20 
  -8  -2  -4   30.20    8.10 
  -8   2   4   21.90    8.70 
   8  -2   4   29.20   14.70 
  -8   2   4    9.50   16.40 
  -8  -2  -4   15.60    8.70 
   8  -2   4    6.50   12.30 
  -8   2   4    0.60   16.00 
  -8  -2  -4    3.70   11.50 
  -8  -2  -4   19.30    7.70 
  -8  -2  -4   22.80   11.20 
   8  -2  -4   24.30   15.90 
  -8   2  -4   18.20    9.10 
  -8  -2   4   32.60   10.00 
  -8  -2   4   34.30   17.00 
  -8  -2   4   14.90   16.80 
   8   2   4   22.70    9.10 
   8  -2  -4   15.90   11.20 
  -8  -2   4   27.70   12.40 
   8   2   4   19.90   13.50 
  -8   2  -4   20.40    8.80 
  -8   2  -4   27.80    8.90 
   8   2   4   -5.80   13.20 
   8  -2  -4   39.30   20.00 
  -8   2  -4   12.80   11.50 
   8  -2   5   35.70   19.80 
   8  -2   5   75.29   16.70 
  -8   2   5   54.99   12.40 
  -8  -2  -5   56.09   13.20 
  -8   2   5   61.09   22.10 
  -8  -2  -5   71.39   11.40 
   8  -2   5   58.69   18.40 
   8  -2   5   53.39   13.30 
  -8  -2  -5   55.09   12.10 
   8   2  -5   58.29   12.20 
   8   2  -5   86.29   24.50 
   8  -2   5   59.69   13.20 
  -8  -2  -5   54.99   14.80 
  -8  -2  -5   57.09   11.30 
  -8   2   5   57.99   14.50 
   8  -2  -5   58.19   15.00 
  -8  -2   5   57.29   19.50 
  -8  -2   5   46.30   15.60 
   8  -2  -5   58.09   13.20 
  -8   2  -5   68.09   12.70 
  -8   2  -5   65.99   12.40 
  -8   2  -5   55.69   10.50 
  -8   2  -5   54.09   11.90 
   8   2   5   58.69   18.00 
   8  -2  -5   47.50   16.30 
  -8  -2   5   51.99   16.20 
   8   2   5   65.29   17.50 
  -8   2  -5   63.69   10.10 
   8  -2  -5   87.39   26.40 
  -8  -2   5   70.39   15.20 
  -8  -2   5   49.99   12.90 
  -8   2  -5   76.19   15.70 
  -8  -2   5   39.10   18.80 
  -8  -2  -6   49.30   12.60 
  -8   2   6   47.10   12.90 
   8  -2   6   20.60   20.90 
   8   2  -6   35.20   15.30 
   8  -2   6   65.79   17.50 
  -8  -2  -6   49.90   11.40 
  -8   2   6   67.09   16.30 
   8  -2   6   55.59   14.00 
  -8  -2  -6   39.30   11.20 
   8  -2   6   34.80   13.10 
   8   2  -6   36.20   11.70 
  -8  -2  -6   30.30   14.50 
   8  -2  -6   35.30   12.70 
  -8   2  -6   63.49   12.90 
  -8   2  -6   45.50   12.20 
  -8  -2   6   35.10   15.40 
   8  -2  -6   36.70   15.30 
  -8   2  -6   50.29    9.80 
  -8   2  -6   51.89   10.50 
  -8  -2   6   27.70   10.50 
  -8   2  -6   35.10   15.80 
   8   2   6   28.20   13.70 
  -8   2  -6   48.40   11.90 
  -8  -2   6   18.20   14.70 
   8   2   6   85.79   19.10 
  -8  -2   6   70.59   21.80 
   8  -2   7   70.29   15.50 
  -8  -2  -7   67.39   16.80 
   8   2  -7   78.39   13.70 
  -8   2   7   54.89   14.20 
  -8   2   7   37.60   16.20 
  -8  -2  -7   71.29   14.50 
  -8  -2  -7   66.09   13.10 
   8  -2   7   70.79   17.80 
  -8  -2  -7   64.69   12.60 
   8   2  -7   54.79   17.00 
   8  -2   7   75.79   16.00 
  -8   2  -7   59.49   12.30 
  -8  -2   7   87.29   18.30 
   8   2   7   79.69   16.50 
  -8  -2   7   43.20   12.00 
  -8  -2   7   64.29   14.80 
  -8   2  -7   85.29   13.40 
   8  -2  -7   66.59   17.10 
  -8   2  -7  116.49   18.30 
   8   2   7   92.39   20.40 
  -8   2  -7   83.39   13.90 
  -8   2  -7   89.89   14.40 
   8  -2  -7   60.79   15.00 
  -8  -2   7   64.49   17.20 
   8  -2  -7   70.09   17.90 
  -8   2  -7   68.29   11.70 
   8  -2   8   40.10   13.20 
   8   2  -8   12.80   12.30 
   8   2  -8   30.80   10.50 
  -8   2   8   23.10   12.80 
  -8  -2  -8   34.80    9.60 
  -8   2   8   22.20   11.50 
  -8  -2  -8   36.00   10.80 
   8   2  -8   51.69   14.90 
   8  -2   8   32.30   11.00 
   8  -2   8   43.90   13.70 
  -8  -2  -8   33.50    9.50 
  -8   2  -8   33.50   10.50 
  -8   2  -8   56.39   12.20 
   8  -2  -8    6.30   14.10 
   8   2   8   50.29   15.50 
  -8   2  -8   15.10   14.80 
  -8   2  -8   30.50    9.10 
  -8  -2   8   15.40   12.70 
   8   2   8   57.49   13.80 
  -8  -2   8   34.20   13.30 
  -8  -2   8   33.90    9.00 
   8  -2  -8   14.70   12.40 
   8  -2  -8   32.40   11.40 
  -8   2  -8   53.89   10.90 
   8  -2   9   32.90   10.00 
   8   2  -9   58.89   11.30 
  -8   2   9   43.10    9.30 
  -8  -2  -9   30.10    8.10 
   8   2  -9   59.19   12.10 
   8   2  -9   46.30    9.30 
  -8   2   9   79.39   11.70 
  -8   2   9   50.29   10.60 
  -8  -2  -9   39.50    8.90 
  -8  -2  -9   34.30    8.10 
   8  -2   9   42.10   10.30 
  -8  -2   9   29.70   10.30 
   8   2   9   46.50   10.70 
   8  -2  -9   55.69   10.30 
   8  -2  -9   50.59   10.10 
   8  -2  -9   44.10   11.10 
   8   2   9   45.60   10.80 
  -8   2  -9   60.39    9.80 
  -8  -2   9   53.59   11.60 
  -8   2  -9   49.99    9.40 
  -9   2   0   77.79   15.70 
   9   2   0   94.09   14.60 
  -9  -2   0   87.09   16.50 
   9  -2   0  101.29   14.90 
   9  -2   0   99.19   20.80 
  -9   2   0   87.49   13.60 
   9   2  -1  109.49   15.80 
  -9   2   1  101.29   18.50 
  -9  -2  -1  105.49   15.00 
   9   2  -1  121.69   21.50 
  -9  -2  -1   89.59   18.00 
   9  -2   1   96.29   16.20 
  -9   2  -1   96.89   16.80 
   9  -2  -1  126.09   24.80 
  -9  -2   1   96.89   18.00 
  -9   2  -1  107.79   15.80 
   9   2   1   83.09   15.50 
   9  -2  -1  113.99   15.70 
  -9   2   2  225.98   33.30 
  -9  -2  -2  216.38   26.80 
   9   2  -2  210.48   25.90 
   9   2  -2  243.28   33.90 
   9  -2   2  226.88   28.60 
   9  -2  -2  228.68   26.20 
  -9  -2   2  232.98   32.30 
   9   2   2  215.58   28.40 
  -9   2  -2  219.88   27.40 
   9  -2  -2  225.38   36.20 
   9  -2   3   75.59   17.00 
  -9  -2  -3   64.19   14.30 
   9   2  -3   91.19   22.50 
  -9   2   3   55.89   17.40 
   9  -2  -3   89.59   24.50 
   9  -2  -3   78.29   13.70 
  -9  -2   3   74.09   18.60 
   9   2   3   52.19   16.00 
  -9   2  -3   70.49   15.10 
   9  -2   4    7.60   17.50 
  -9   2   4   19.10   17.40 
  -9  -2  -4   29.70   12.90 
   9  -2   4   12.70   10.30 
  -9  -2  -4   27.60    9.60 
   9  -2   4   15.70   16.20 
  -9  -2  -4   35.20    8.50 
  -9  -2  -4   24.40    9.50 
  -9  -2  -4    8.10   16.10 
  -9  -2  -4   31.60   11.60 
   9  -2   4   12.10   13.50 
  -9  -2  -4   23.60    8.90 
   9   2  -4   41.80   20.00 
  -9   2   4   39.90   16.10 
   9   2  -4   26.80   10.10 
  -9   2   4    1.10    9.20 
   9   2   4   26.90   15.00 
  -9  -2   4   -0.70   17.10 
  -9   2  -4   22.90    8.00 
  -9  -2   4   29.10   13.70 
  -9   2  -4   25.20    9.40 
  -9   2  -4   20.60    9.10 
  -9   2  -4   28.60    9.50 
   9  -2  -4   14.30   12.80 
   9  -2  -4   31.60   10.60 
  -9   2  -4   38.80   13.80 
   9   2   4   11.40   15.30 
   9   2   4   28.70   10.50 
  -9  -2   4   16.10    9.20 
  -9  -2   4   13.60   14.30 
  -9  -2   4   35.60   17.60 
   9  -2  -4   57.99   23.40 
   9  -2   5   44.10   15.90 
   9   2  -5   27.40   12.30 
  -9  -2  -5   57.69   11.90 
   9  -2   5   65.29   21.20 
  -9   2   5   59.19   16.40 
  -9  -2  -5   54.09   10.90 
  -9   2   5   55.69   12.60 
  -9  -2  -5   49.70   10.80 
  -9  -2  -5   56.89   15.20 
  -9  -2  -5   59.89   11.70 
   9  -2   5   55.29   13.70 
  -9   2  -5   56.09   12.70 
   9   2   5   86.09   18.50 
  -9  -2   5   67.19   13.10 
  -9   2  -5   40.20   10.20 
  -9  -2   5   50.99   16.20 
   9  -2  -5   56.19   15.50 
  -9  -2   5   38.20   15.40 
  -9   2  -5   77.19   16.90 
  -9   2  -5   58.39   11.80 
  -9  -2   5   57.09   20.70 
  -9  -2   5   84.49   18.00 
  -9   2  -5   47.20   10.40 
   9   2   5   63.09   14.00 
   9  -2  -5   54.09   13.20 
   9  -2  -5   42.30   15.80 
  -9   2  -5   72.49   12.90 
   9  -2   6  257.57   31.90 
   9  -2   6  297.77   34.00 
  -9  -2  -6  311.17   31.50 
   9  -2   6  273.17   32.10 
  -9   2   6  274.97   31.50 
  -9  -2  -6  291.27   30.70 
  -9  -2  -6  256.27   29.80 
   9   2  -6  258.77   31.20 
  -9  -2  -6  287.47   34.00 
   9   2  -6  236.88   32.90 
  -9   2   6  276.87   34.00 
   9  -2   6  254.07   35.10 
  -9   2  -6  293.07   35.80 
  -9  -2   6  277.67   31.50 
  -9  -2   6  255.77   34.20 
  -9   2  -6  278.07   30.10 
  -9   2  -6  253.27   30.90 
  -9   2  -6  226.38   29.70 
   9   2   6  306.17   34.60 
   9   2   6  282.17   32.40 
  -9  -2   6  223.88   29.00 
  -9   2  -6  271.87   31.60 
  -9   2  -6  294.57   30.10 
  -9  -2   6  286.07   46.30 
  -9  -2   6  262.37   33.00 
   9  -2  -6  296.97   32.90 
   9  -2  -6  343.57   34.70 
   9   2  -7    8.10   10.50 
  -9  -2  -7    3.30   10.30 
   9  -2   7    5.10   11.30 
   9  -2   7   17.70   13.80 
  -9  -2  -7   20.80   14.00 
  -9   2   7   11.40   10.80 
  -9  -2  -7    7.50    9.70 
   9  -2   7    9.10   16.00 
  -9  -2  -7   20.80   10.00 
   9   2  -7   15.00   14.50 
  -9   2   7  -33.70   13.60 
   9  -2  -7    2.20   12.40 
   9  -2  -7   35.70   15.50 
  -9   2  -7   -1.30    9.20 
  -9   2  -7   -1.50    8.50 
  -9   2  -7   21.50   10.20 
   9  -2  -7    3.00   14.60 
  -9  -2   7  -17.20   14.80 
   9   2   7   -1.30   17.10 
  -9  -2   7    8.70   11.40 
  -9   2  -7   10.60   14.30 
  -9  -2   7   14.90   15.20 
  -9   2  -7   14.90   12.10 
  -9  -2   7    7.80    8.60 
   9   2   7  -10.70   13.30 
   9  -2   8   35.10   13.00 
  -9  -2  -8   14.40    8.20 
  -9   2   8    2.20    8.90 
   9  -2   8   33.70   11.60 
   9   2  -8   14.90   11.60 
  -9  -2  -8   17.80    8.80 
   9   2  -8   16.30    9.10 
  -9   2   8   22.50   11.10 
   9  -2   8    4.90   10.20 
   9   2  -8    1.90   12.70 
  -9  -2  -8    7.60    9.70 
  -9   2   8    7.20   12.30 
  -9   2  -8    0.90    8.40 
   9  -2  -8   31.70   13.80 
  -9  -2   8    5.80    7.10 
  -9  -2   8   -1.50   11.00 
  -9   2  -8   10.70   12.20 
   9  -2  -8  -13.60   11.60 
   9  -2  -8    8.60   10.40 
   9   2   8    3.00   11.70 
   9   2   8   20.50   14.00 
  -9   2  -8   13.50    9.50 
  -9  -2   8   19.10   13.00 
   9  -2   9    2.70    8.00 
   9   2  -9    5.50    6.30 
  -9   2   9    3.80    7.90 
  -9   2   9   -1.90    7.60 
   9   2  -9   -5.30    7.60 
  -9  -2  -9   -5.20    6.00 
  -9  -2  -9    0.00    5.30 
  -9  -2  -9   -1.20    6.30 
  -9   2   9   10.30    6.50 
   9   2  -9   -2.60    8.60 
   9  -2   9   -4.30    7.00 
   9   2   9   11.30    8.20 
  -9  -2   9   11.40    8.60 
  -9   2  -9   -0.70    6.10 
   9  -2  -9   14.20    8.20 
   9  -2  -9    0.80    7.50 
   9   2   9   14.90    8.40 
  -9  -2   9   10.60    8.60 
  -9   2  -9    8.00    7.10 
   9  -2  -9    4.50    7.10 
  10  -2   0  -13.10   15.10 
  10   2   0    1.20    9.60 
 -10   2   0    6.10   10.80 
 -10  -2   0   -0.10   12.10 
  10  -2   0    6.70   10.10 
 -10   2   1  821.92   86.79 
 -10  -2  -1  796.42   87.39 
 -10  -2  -1  882.31   83.49 
  10   2  -1  840.62   87.59 
  10   2  -1  817.12   83.69 
  10  -2   1  847.32   84.69 
 -10  -2   1  892.91   87.59 
  10  -2  -1  849.61   83.99 
 -10   2  -1  867.41   83.99 
 -10   2  -1  873.41   91.99 
  10  -2  -1  821.62   88.99 
  10   2   1  818.32   84.39 
  10   2  -2  130.69   25.20 
  10  -2   2  137.79   20.00 
  10   2  -2  102.89   16.50 
 -10  -2  -2  104.19   18.70 
 -10  -2  -2  103.89   17.40 
 -10   2   2   87.19   16.30 
  10  -2   2   81.79   29.20 
 -10   2   2   94.29   20.70 
  10  -2  -2  149.99   29.40 
 -10  -2   2   86.49   19.70 
 -10  -2   2  111.69   25.10 
 -10   2  -2  115.09   18.20 
  10   2   2  126.59   19.90 
  10  -2  -2  111.49   17.00 
 -10   2  -2  138.79   18.90 
 -10   2  -2  115.89   19.40 
 -10  -2   2   81.89   19.10 
  10   2  -3   54.99   21.90 
 -10   2   3   26.30    9.90 
 -10   2   3   31.10   11.10 
 -10   2   3   30.60   16.40 
 -10  -2  -3   34.40    9.20 
  10  -2   3   26.00   15.00 
  10   2  -3   31.40   11.70 
 -10   2   3   33.70   16.80 
 -10  -2  -3   15.40   16.10 
 -10  -2  -3   45.50   12.70 
  10  -2   3   12.60   12.10 
 -10  -2  -3   29.50   12.40 
 -10  -2  -3   31.40    9.00 
 -10  -2  -3   21.70    9.20 
  10  -2   3   30.30   10.20 
 -10  -2  -3   23.00    9.30 
  10  -2   3   13.70   15.40 
  10   2   3   23.10   14.60 
  10  -2  -3   50.19   23.50 
  10  -2  -3   27.60   11.40 
 -10   2  -3   31.70    9.80 
 -10  -2   3   31.90   10.00 
  10  -2  -3   17.30   10.30 
 -10  -2   3   35.60   13.90 
 -10  -2   3   58.99   14.10 
  10   2   3   21.90   10.50 
 -10   2  -3   26.70    9.40 
 -10  -2   3   11.50   16.00 
 -10   2  -3   26.40   12.30 
  10   2   3   19.70   13.70 
 -10   2  -3   18.50    8.90 
 -10   2  -3   12.80   19.60 
 -10   2  -3   37.20    9.80 
 -10  -2   3   30.20   16.00 
  10   2  -4  271.27   37.90 
 -10  -2  -4  205.78   22.90 
  10  -2   4  175.58   29.70 
  10  -2   4  265.87   30.80 
  10  -2   4  206.88   26.20 
 -10   2   4  200.78   23.50 
 -10   2   4  236.18   29.50 
 -10  -2  -4  195.58   23.40 
  10   2  -4  180.88   23.00 
 -10  -2  -4  255.17   27.70 
  10  -2   4  190.78   23.60 
 -10  -2  -4  207.18   22.80 
 -10   2   4  137.79   28.50 
 -10  -2  -4  259.57   27.00 
 -10  -2  -4  210.28   24.00 
 -10  -2  -4  150.48   29.00 
 -10   2  -4  178.98   22.80 
  10  -2  -4  216.58   25.90 
  10   2   4  238.18   26.90 
 -10  -2   4  179.08   25.40 
 -10  -2   4  150.58   29.70 
 -10   2  -4  204.18   23.80 
  10   2   4  143.39   28.40 
  10  -2  -4  184.58   23.40 
  10   2   4  169.38   23.20 
 -10   2  -4  247.58   27.90 
 -10   2  -4  118.19   32.00 
 -10  -2   4  191.98   23.90 
 -10   2  -4  193.88   24.00 
 -10   2  -4  197.58   23.10 
 -10  -2   4  184.58   26.20 
 -10  -2   4  208.58   25.60 
  10  -2  -4  204.18   38.30 
  10  -2  -4  206.88   25.90 
 -10  -2   4  182.98   27.90 
 -10   2   5  141.29   18.90 
 -10  -2  -5  126.99   17.70 
  10   2  -5  135.59   18.20 
 -10  -2  -5  150.68   21.20 
 -10  -2  -5  116.69   16.70 
  10  -2   5  104.69   18.60 
  10  -2   5  126.29   22.30 
 -10  -2  -5  103.39   16.20 
 -10  -2  -5  119.39   17.40 
 -10   2   5   95.69   20.10 
  10  -2   5  146.29   24.90 
 -10  -2   5  102.89   20.80 
  10  -2  -5  118.09   20.10 
 -10   2  -5  149.49   18.30 
 -10   2  -5  124.29   17.80 
 -10   2  -5  135.69   18.00 
 -10  -2   5  151.68   26.10 
 -10   2  -5  131.99   21.40 
  10   2   5  189.28   23.70 
 -10  -2   5  105.89   18.10 
  10   2   5  149.59   19.30 
 -10  -2   5  167.58   23.90 
 -10  -2   5  137.69   18.50 
  10  -2  -5  108.19   18.60 
 -10   2  -5   99.49   16.20 
 -10  -2   5  124.79   20.70 
 -10  -2  -6  106.79   20.50 
 -10  -2  -6   97.89   15.60 
  10  -2   6  108.59   23.30 
  10  -2   6  113.09   18.40 
 -10  -2  -6   73.99   15.00 
 -10   2   6  103.39   20.20 
 -10  -2  -6  105.29   16.80 
  10   2  -6   95.89   15.70 
 -10   2   6  102.79   17.10 
  10  -2   6  124.59   21.80 
  10   2  -6   97.49   20.10 
  10  -2  -6  111.99   18.00 
 -10  -2   6  122.89   20.70 
 -10  -2   6   87.49   14.20 
 -10   2  -6  110.99   21.00 
  10  -2  -6  110.79   20.30 
 -10   2  -6  111.09   16.40 
 -10   2  -6  101.49   16.40 
 -10  -2   6   92.39   20.70 
 -10   2  -6   85.99   14.30 
  10   2   6   66.89   20.50 
  10   2   6  119.99   25.70 
 -10  -2   6  120.69   16.50 
 -10   2  -6  107.49   15.80 
  10   2   6  109.19   18.60 
 -10  -2  -7   21.30   10.20 
 -10   2   7   44.50   15.30 
  10  -2   7   42.70   14.20 
 -10  -2  -7   12.30   11.10 
 -10  -2  -7   25.60   10.40 
 -10   2   7    5.50   14.10 
 -10  -2  -7   31.50   14.20 
  10  -2   7   23.70   15.10 
 -10   2   7   31.90   11.10 
  10   2  -7   26.60   14.80 
  10   2  -7   24.80   10.40 
  10  -2   7   21.90   12.30 
 -10  -2   7   28.50   15.40 
 -10   2  -7   22.70   10.50 
 -10   2  -7   10.80   11.00 
 -10  -2   7   45.10   12.50 
  10   2   7   45.00   14.20 
  10   2   7   42.30   17.00 
  10  -2  -7   51.39   15.80 
  10  -2  -7   20.30   12.50 
  10  -2  -7   44.80   14.70 
 -10   2  -7   63.49   15.70 
 -10   2  -7   24.60   10.60 
 -10  -2   7   25.80    8.30 
 -10  -2   7   34.60   15.20 
  10   2   7   10.50   22.90 
  10   2  -8   25.10    8.80 
 -10   2   8   26.80    9.70 
 -10  -2  -8   29.00    8.30 
  10  -2   8   27.30   12.50 
 -10  -2  -8   38.20    9.50 
 -10   2   8   17.00   12.50 
  10  -2   8   24.90   10.00 
  10   2  -8   16.00   11.10 
  10   2  -8   10.50   12.50 
  10  -2   8   21.50   11.20 
 -10  -2  -8   27.00    8.20 
 -10   2   8   29.10    8.60 
 -10  -2   8   70.39   11.60 
 -10   2  -8   46.10   10.10 
  10   2   8   27.50   11.60 
 -10   2  -8   14.70    8.00 
  10  -2  -8   40.50   12.30 
  10  -2  -8   45.00   12.90 
  10   2   8   44.70   13.40 
  10  -2  -8   34.60   10.60 
 -10  -2   8   42.50   13.30 
 -10  -2  -9   16.70    6.10 
 -10   2   9   13.10    7.80 
  10   2  -9    3.70    7.40 
 -10  -2  -9   -3.10    5.00 
 -10   2   9    6.90    7.60 
  10  -2   9   -2.60    7.40 
  10   2  -9   15.30    5.60 
 -10  -2   9    4.70    7.10 
 -10   2  -9    6.10    5.90 
 -10  -2   9    3.40    7.90 
  10   2   9   13.40    9.80 
  10  -2  -9   -5.50    8.40 
  10  -2  -9    4.40    6.10 
  10   2   9   11.60    8.60 
 -10   2  -9    5.80    5.10 
  10  -2  -9   10.50    8.10 
 -11   2   0   56.59   11.90 
 -11   2   0   58.29   21.10 
 -11  -2   0   44.80   16.50 
 -11  -2   0   49.60   12.20 
 -11   2   0   32.50   11.60 
 -11   2   0   33.00   10.70 
 -11   2   0   39.60   13.70 
 -11  -2   0   46.10   15.00 
 -11  -2   0   52.29   11.90 
 -11  -2   0   32.30   15.50 
 -11   2   0   53.29   12.30 
  11   2   0   53.29   13.80 
 -11  -2   0   57.09   11.00 
  11  -2   0   75.59   14.10 
  11  -2   0   55.29   11.60 
  11  -2   1  172.88   21.40 
 -11  -2  -1  163.68   26.40 
  11  -2   1  164.38   25.40 
  11  -2   1  221.58   26.30 
  11   2  -1  205.18   24.50 
 -11  -2  -1  175.58   21.80 
 -11  -2  -1  183.98   22.80 
 -11   2   1  211.78   22.30 
 -11  -2  -1  129.79   26.20 
 -11   2   1  233.78   27.70 
 -11   2   1  165.28   26.60 
 -11  -2  -1  197.88   22.30 
 -11  -2  -1  199.28   21.20 
 -11   2   1  198.68   22.20 
 -11  -2  -1  182.88   30.20 
 -11   2   1  193.78   27.40 
 -11   2   1  194.78   22.60 
 -11   2   1  177.18   31.50 
 -11   2  -1  207.98   21.30 
 -11   2  -1  187.58   22.00 
  11  -2  -1  191.68   24.60 
 -11   2  -1  170.88   21.70 
  11   2   1  224.08   25.80 
 -11   2  -1  217.98   24.30 
  11  -2  -1  147.39   31.10 
 -11  -2   1  188.78   25.70 
 -11  -2   1  187.98   22.90 
  11  -2  -1  174.58   21.40 
 -11   2  -1  200.88   30.30 
 -11  -2   1  146.69   25.40 
 -11  -2   1  194.08   22.30 
 -11  -2   1  185.78   22.30 
 -11  -2   1  141.89   27.50 
  11  -2   2  270.67   32.00 
 -11  -2  -2  241.78   27.10 
 -11  -2  -2  190.18   30.10 
 -11   2   2  242.38   35.60 
 -11  -2  -2  244.18   24.80 
 -11  -2  -2  240.08   26.40 
 -11   2   2  224.28   27.40 
  11  -2   2  208.18   26.30 
  11   2  -2  259.27   37.10 
 -11  -2  -2  238.58   28.40 
 -11  -2  -2  194.68   25.80 
 -11   2   2  231.88   30.20 
  11  -2   2  223.28   30.20 
 -11   2   2  243.28   27.40 
 -11   2   2  230.58   26.10 
 -11  -2  -2  192.88   26.30 
  11   2  -2  212.98   27.60 
  11  -2  -2  198.88   27.20 
  11  -2  -2  248.68   28.40 
 -11  -2   2  214.08   28.00 
 -11  -2   2  220.98   29.20 
 -11  -2   2  249.48   27.70 
 -11   2  -2  226.88   33.70 
 -11   2  -2  258.77   25.40 
  11   2   2  222.08   29.90 
  11   2   2  223.58   25.80 
 -11   2  -2  219.18   26.20 
 -11   2  -2  251.67   29.90 
 -11  -2   2  236.08   30.00 
 -11   2  -2  221.08   26.10 
  11  -2  -2  220.18   26.10 
  11  -2  -2  222.58   38.60 
 -11   2  -2  195.68   25.50 
 -11  -2   2  205.38   26.10 
  11  -2   3   11.10   10.60 
 -11  -2  -3   11.70    9.20 
  11  -2   3   14.00   17.80 
 -11  -2  -3   19.40    9.90 
 -11  -2  -3   16.30   11.60 
  11  -2   3   44.40   12.90 
 -11  -2  -3    4.40    8.10 
 -11   2   3   34.20   17.80 
 -11  -2  -3   21.80   17.30 
  11  -2   3   22.40   15.80 
 -11   2   3   22.50   12.00 
 -11   2   3   20.80    9.90 
  11   2  -3   65.99   23.80 
 -11  -2  -3   10.60   10.10 
  11   2  -3   22.20   12.20 
 -11   2   3   23.80   16.50 
  11   2   3   22.20   13.30 
 -11   2  -3   20.90   10.20 
  11  -2  -3   36.60   23.40 
 -11   2  -3   18.20   13.80 
 -11  -2   3   35.70   17.40 
 -11   2  -3   11.50   21.10 
 -11   2  -3   17.00    9.40 
 -11   2  -3   -1.00    9.30 
 -11  -2   3   53.19   12.60 
 -11   2  -3   15.80   10.20 
  11   2   3   -7.30   14.40 
 -11  -2   3    9.50   14.50 
  11  -2  -3   13.80   10.80 
 -11  -2   3   26.10   13.40 
 -11  -2   3   32.80   17.10 
 -11  -2   3   18.70    9.60 
  11   2   3   13.20   10.60 
  11  -2  -3   26.40   12.20 
  11   2  -4  105.09   18.30 
 -11  -2  -4  136.99   26.80 
 -11  -2  -4  146.39   18.70 
  11  -2   4  167.08   25.90 
 -11   2   4  153.58   25.70 
  11  -2   4  131.59   20.90 
 -11  -2  -4  151.48   18.40 
 -11   2   4  147.39   19.60 
 -11  -2  -4  135.39   18.60 
 -11  -2  -4  154.28   22.80 
 -11  -2  -4  113.09   17.40 
  11  -2   4  148.69   20.00 
 -11   2   4  150.48   23.90 
 -11   2  -4  130.09   22.20 
  11  -2  -4  139.89   21.30 
 -11  -2   4  152.78   21.20 
 -11  -2   4  132.49   25.60 
 -11   2  -4  164.68   19.20 
 -11  -2   4  129.09   18.50 
 -11   2  -4  111.79   18.10 
  11   2   4  144.69   22.00 
 -11  -2   4  125.09   22.50 
 -11  -2   4  124.49   22.60 
  11   2   4  143.59   19.70 
 -11   2  -4  145.99   18.90 
 -11   2  -4  149.88   19.10 
  11  -2  -4  113.19   18.80 
 -11  -2  -5  319.97   30.70 
  11  -2   5  332.07   37.50 
 -11  -2  -5  274.17   29.70 
  11  -2   5  250.77   30.00 
 -11  -2  -5  257.07   28.70 
  11  -2   5  305.27   33.20 
 -11  -2  -5  258.07   29.70 
 -11   2   5  216.28   29.20 
 -11  -2  -5  294.77   33.30 
 -11   2   5  204.58   31.40 
  11   2  -5  228.18   29.00 
 -11   2  -5  214.38   31.70 
 -11  -2   5  285.27   34.00 
 -11   2  -5  260.67   30.10 
  11   2   5  304.17   34.00 
  11   2   5  272.77   30.20 
  11  -2  -5  235.68   29.60 
  11  -2  -5  183.98   30.00 
 -11  -2   5  282.17   33.90 
 -11  -2   5  252.97   34.50 
 -11   2  -5  209.78   30.00 
 -11   2  -5  281.87   30.10 
 -11  -2   5  245.38   30.80 
 -11   2  -5  238.08   28.80 
 -11  -2   5  266.57   32.40 
  11  -2   6   22.90   15.70 
 -11   2   6  -15.00   15.20 
 -11   2   6    8.90   15.10 
  11  -2   6   19.00   13.80 
  11  -2   6   13.20   20.10 
 -11  -2  -6   -2.30    9.20 
  11   2  -6    0.90   10.00 
 -11   2   6   27.20   12.80 
  11   2  -6    6.50   15.40 
 -11  -2  -6   34.90   14.40 
 -11  -2  -6    3.50   10.10 
 -11  -2  -6   16.30   11.20 
 -11  -2   6   35.40   16.30 
  11  -2  -6  -19.00   15.60 
 -11   2  -6    3.70   11.20 
  11  -2  -6  -17.60   22.20 
  11   2   6   -2.20   13.50 
 -11  -2   6    4.30   10.70 
 -11   2  -6    3.90    9.70 
 -11  -2   6   31.50   15.60 
  11   2   6  -19.00   20.30 
 -11   2  -6    1.90   10.30 
  11   2   6   15.90   15.60 
 -11  -2   6    3.20    7.60 
  11  -2  -6    1.30   12.60 
 -11   2  -6   22.40   14.70 
  11  -2   7    6.20   24.90 
 -11   2   7    0.80   13.70 
  11  -2   7   45.40   15.60 
  11   2  -7   17.00   13.50 
 -11   2   7   23.30   13.80 
 -11  -2  -7   15.20   10.40 
 -11  -2  -7   20.40    9.20 
 -11  -2  -7   30.60    9.70 
  11  -2   7   22.90   13.10 
  11   2  -7   20.30    9.30 
 -11  -2  -7   43.10   19.30 
 -11   2   7    9.70    9.30 
 -11   2   7   23.50    9.60 
 -11  -2   7   25.50   14.60 
  11  -2  -7   18.70   14.00 
  11   2   7    9.30   17.30 
  11  -2  -7    5.40   10.80 
 -11  -2   7    8.80   14.30 
 -11   2  -7   11.60    9.10 
 -11   2  -7   45.20   21.70 
 -11   2  -7   20.20   10.00 
  11  -2  -7   26.70   13.20 
 -11   2  -7   20.90   10.10 
  11   2   7   21.40   12.60 
 -11  -2   7   18.10   10.40 
  11   2   7    6.30   14.70 
  11  -2   8   17.70   11.00 
  11   2  -8   12.60    9.30 
  11  -2   8   -1.50    9.00 
 -11  -2  -8   23.00    8.30 
  11   2  -8   15.40    7.10 
 -11   2   8    5.50   11.50 
 -11  -2  -8    9.10    6.50 
 -11   2   8   21.10    6.80 
 -11   2   8   14.40    8.10 
  11  -2   8    7.90   10.00 
 -11  -2  -8   13.60    6.90 
  11   2  -8   11.00   10.80 
  11  -2  -8   23.40   10.10 
 -11   2  -8   13.30    7.50 
 -11   2  -8   13.80    8.40 
  11   2   8   20.00   10.00 
  11  -2  -8   14.00   10.60 
  11  -2  -8    8.30    8.70 
 -11  -2   8    0.00   10.60 
 -11  -2   8   18.80    8.70 
  11   2   8    1.00   11.20 
 -12   2   0  -23.30   10.50 
 -12  -2   0    7.50   13.90 
  12   2   0  -67.69   19.80 
 -12   2   0    1.30   10.40 
 -12   2   0   -8.70   21.60 
  12   2   0   -2.20    9.80 
 -12   2   0    1.00    8.50 
 -12  -2   0   -9.20    9.40 
 -12  -2   0    8.20    9.80 
 -12   2   0   -2.80    9.40 
  12  -2   0   19.40   12.60 
 -12   2   0    4.60    9.90 
 -12  -2   0  -14.50   11.50 
  12  -2   0   -1.80    9.40 
  12   2   0   28.90   12.30 
 -12   2   0  -48.70   15.50 
 -12  -2   0   13.20   18.00 
 -12  -2   0   -5.60    7.90 
  12  -2   0   -1.00   14.60 
 -12  -2   0    5.80   11.30 
 -12  -2   0  -13.20   14.70 
 -12   2   1   94.59   15.40 
 -12  -2  -1   27.60   19.20 
 -12  -2  -1   83.59   15.50 
  12  -2   1   79.89   18.30 
 -12  -2  -1   87.19   14.00 
 -12   2   1   82.29   18.60 
 -12  -2  -1   76.59   14.70 
  12  -2   1   63.09   18.80 
  12   2  -1  121.39   17.50 
 -12   2   1   86.29   14.50 
 -12  -2  -1   78.29   18.40 
 -12   2   1  102.59   16.40 
 -12   2   1   89.59   14.10 
  12  -2   1   67.79   13.70 
 -12  -2  -1   84.49   12.90 
 -12  -2  -1   96.39   21.90 
 -12   2   1   70.69   20.70 
 -12  -2   1   87.29   22.20 
 -12   2  -1   73.39   13.80 
 -12   2  -1   93.49   18.70 
 -12   2  -1   86.89   14.70 
  12   2   1  113.39   18.50 
 -12   2  -1   83.99   14.00 
  12  -2  -1   77.19   18.30 
 -12   2  -1   87.89   13.80 
  12  -2  -1   76.29   13.90 
 -12  -2   1   65.69   18.90 
 -12  -2   1   73.19   15.30 
  12   2   1   91.29   14.60 
 -12  -2   1  104.29   14.90 
 -12  -2   1   82.99   16.90 
  12  -2  -1  119.29   17.80 
 -12  -2   1   68.69   18.60 
 -12   2  -1  127.99   26.60 
 -12   2   2   88.39   13.70 
  12  -2   2   75.69   14.20 
 -12  -2  -2   70.39   15.20 
  12   2  -2   64.29   15.70 
 -12  -2  -2   56.39   13.10 
 -12   2   2   61.19   19.10 
 -12   2   2   61.49   14.40 
  12  -2   2   77.19   18.40 
 -12  -2  -2   83.99   12.30 
 -12  -2  -2   89.89   13.90 
  12  -2   2   87.29   20.40 
 -12  -2  -2   84.89   21.60 
 -12   2   2   95.99   21.40 
 -12   2   2   89.69   16.10 
 -12  -2   2    1.30   22.00 
 -12  -2   2   34.20   16.70 
 -12  -2   2   77.69   18.50 
  12  -2  -2   61.79   16.40 
  12  -2  -2   65.29   13.40 
  12   2   2   79.99   17.90 
 -12   2  -2   56.29   12.70 
  12   2   2   55.09   13.80 
 -12   2  -2   68.09   13.00 
 -12  -2   2   75.89   17.30 
 -12   2  -2   78.09   13.30 
  12  -2  -2   59.09   27.40 
 -12   2  -2  120.39   26.70 
 -12  -2   2   69.69   15.10 
 -12  -2   2   58.29   16.20 
  12  -2  -2   77.19   15.50 
 -12   2  -2   83.69   17.30 
 -12  -2   2   66.79   12.90 
 -12  -2  -3    6.60   11.10 
  12  -2   3   -4.90   11.80 
 -12  -2  -3   27.90   20.20 
 -12   2   3   20.60   19.60 
 -12  -2  -3   21.00    9.30 
 -12   2   3   19.70   11.30 
 -12  -2  -3   16.60   11.00 
  12   2  -3   18.40   11.90 
 -12  -2  -3   24.30   13.60 
  12  -2   3   20.40   12.50 
  12  -2   3   38.40   19.60 
 -12  -2  -3    9.00    9.70 
  12  -2  -3   18.90   11.30 
 -12  -2   3   42.50   19.20 
 -12  -2   3   -7.40   14.00 
 -12   2  -3   22.60   24.00 
 -12   2  -3    6.80    9.50 
 -12   2  -3   19.30   16.50 
 -12  -2   3    6.50   10.60 
  12   2   3   15.10   12.10 
 -12  -2   3   27.10   12.60 
 -12   2  -3    9.70   10.10 
 -12   2  -3   18.50   15.60 
 -12   2  -3   18.00   10.50 
 -12  -2   3   31.10   14.80 
  12   2   3   18.90   13.10 
 -12  -2  -4   12.90    9.50 
 -12  -2  -4    6.60   11.80 
 -12   2   4   22.00   12.20 
 -12  -2  -4   11.70   11.40 
  12   2  -4   10.20   14.80 
 -12   2   4  -12.70   15.50 
  12  -2   4    8.20   13.70 
 -12   2   4   28.10   20.60 
 -12  -2  -4   14.40   14.20 
  12   2  -4   10.90   11.30 
  12  -2   4   38.70   13.60 
 -12  -2  -4   32.90   10.80 
  12  -2   4   34.80   20.30 
 -12  -2  -4   49.50   22.70 
 -12  -2   4   44.20   20.80 
 -12   2  -4   37.20   12.00 
 -12  -2   4   20.20   12.40 
  12   2   4    7.20   14.00 
 -12   2  -4   18.50   10.50 
  12   2   4   21.80   13.10 
 -12  -2   4   29.00   17.00 
 -12  -2   4   -7.20   15.20 
 -12   2  -4   21.80   11.80 
 -12  -2   4    1.10   13.70 
  12  -2  -4   36.10   15.50 
  12  -2  -4   11.00   12.20 
 -12   2  -4   24.40   15.80 
  12  -2   5   90.49   17.40 
 -12  -2  -5   49.00   12.80 
  12  -2   5   51.39   15.10 
 -12   2   5   36.50   13.40 
 -12  -2  -5   65.29   17.00 
 -12   2   5   25.70   16.10 
  12  -2   5   80.19   23.50 
 -12  -2  -5   17.30   12.00 
 -12  -2  -5   44.10   11.60 
  12   2  -5   44.40   12.80 
 -12  -2  -5   19.00   10.90 
  12   2   5   34.50   17.00 
 -12   2  -5   61.49   17.40 
 -12  -2   5   22.10   17.70 
  12  -2  -5   28.50   17.20 
  12  -2  -5    9.60   13.30 
 -12  -2   5   27.00   17.20 
 -12  -2   5   24.90   16.40 
  12  -2  -5   25.90   15.00 
 -12   2  -5   34.40   12.30 
 -12  -2   5   44.50   20.70 
 -12   2  -5   66.89   13.20 
 -12  -2   5   36.90   14.00 
  12   2   5   69.49   23.40 
 -12   2  -5   37.50   11.50 
  12   2   5   29.50   14.50 
  12  -2   6   24.50   13.50 
 -12   2   6   25.20   12.10 
 -12  -2  -6   -4.40   13.30 
 -12   2   6   -4.60   14.60 
 -12  -2  -6    9.90    9.70 
  12   2  -6   18.00   15.70 
  12  -2   6   24.40   19.90 
 -12  -2  -6   21.90   11.40 
  12   2  -6   10.70    9.50 
 -12  -2  -6   -2.20    9.40 
 -12   2   6    9.20   15.00 
  12  -2   6   18.30   14.70 
 -12   2  -6   24.50   11.10 
  12   2   6   13.20   19.80 
  12   2   6    9.80   12.90 
  12  -2  -6   13.30   12.00 
  12   2   6   11.40   15.90 
 -12  -2   6   -2.40   14.60 
  12  -2  -6   26.20   15.30 
 -12   2  -6   29.30   14.50 
 -12   2  -6   18.40   10.20 
 -12  -2   6    7.70   15.20 
  12  -2  -6   16.20   13.00 
 -12   2  -6    0.20   10.90 
  12   2  -7   14.80   12.30 
 -12   2   7    5.00   12.20 
  12  -2   7   10.30   12.70 
  12  -2   7   10.40   14.80 
 -12   2   7   10.60    7.70 
  12   2  -7   -1.90    7.90 
  12  -2   7    6.00   11.40 
 -12  -2  -7   -3.10    7.80 
 -12   2   7  -16.00   12.70 
 -12  -2  -7    3.60    9.10 
 -12  -2  -7    9.30    7.90 
  12  -2  -7  -24.90   12.00 
 -12   2  -7   10.80    9.20 
  12  -2  -7    0.80   12.20 
 -12   2  -7   -2.60    8.90 
 -12   2  -7    5.40    7.70 
 -12  -2   7   -7.90   12.90 
 -12  -2   7   -0.10   12.60 
  12   2   7    2.80   11.20 
  12   2   7   -0.70   15.70 
  12   2   7    3.70   12.60 
  12  -2  -7    3.80    9.50 
 -12   2   8    9.90    9.70 
  12  -2   8    8.40    8.10 
  12   2  -8   18.70    8.20 
  12   2  -8    6.00    5.70 
 -12  -2  -8   -0.20    5.40 
 -12  -2  -8   19.50    7.70 
 -12  -2  -8    7.60    5.80 
  12  -2   8   -5.10    9.20 
  12   2  -8   12.00    9.00 
  12  -2  -8    7.70    7.40 
  12  -2  -8   -2.60    8.50 
 -12   2  -8   15.30    6.60 
 -12   2  -8    9.80    7.10 
  12   2   8    2.10    8.90 
  12   2   8    3.30    8.10 
 -12  -2   8    7.20    9.30 
  12  -2  -8   12.70    8.00 
  13   2   0   38.70   12.40 
 -13  -2   0   49.70   12.90 
 -13  -2   0   10.40   16.60 
 -13   2   0   58.19   12.80 
 -13   2   0   45.30   13.00 
 -13   2   0   51.09   12.50 
 -13  -2   0   49.99   10.70 
 -13  -2   0   78.89   16.20 
 -13   2   0   45.90   14.00 
 -13   2   0   32.70   20.20 
  13  -2   0   58.89   12.90 
 -13  -2   0   55.39   14.10 
 -13  -2   0   52.39   19.30 
 -13  -2   0   72.99   14.40 
 -13  -2   0   81.79   23.10 
 -13   2   0   69.79   14.20 
  13  -2   0   66.69   17.80 
 -13   2   1  153.68   23.00 
 -13  -2  -1  209.98   28.20 
 -13  -2  -1  201.98   25.60 
 -13  -2  -1  186.08   23.80 
  13   2  -1  210.08   22.90 
 -13  -2  -1  178.58   22.10 
 -13   2   1  193.48   29.10 
 -13   2   1  195.38   24.40 
  13  -2   1  186.68   22.90 
 -13   2   1  189.28   23.30 
  13  -2   1  184.48   28.10 
 -13   2   1  188.38   24.50 
 -13  -2  -1  172.08   23.60 
 -13  -2  -1  273.37   36.80 
 -13  -2   1  214.68   23.70 
 -13  -2   1  169.08   30.20 
  13   2   1  188.88   23.10 
 -13   2  -1  194.78   23.30 
  13   2   1  149.69   27.40 
 -13  -2   1  202.08   26.30 
  13  -2  -1  172.28   22.50 
 -13   2  -1  166.68   24.30 
 -13  -2   1  158.38   23.90 
 -13  -2   1  172.78   25.00 
 -13   2  -1  212.58   23.50 
 -13   2  -1  339.07   43.70 
 -13  -2   1  184.78   28.90 
 -13   2  -1  181.88   23.70 
 -13   2  -1  163.68   22.80 
  13  -2  -1  170.48   25.90 
 -13  -2  -2   44.30   14.90 
 -13   2   2   29.90   12.70 
 -13   2   2   51.89   14.90 
  13  -2   2   42.50   18.90 
  13   2  -2   68.19   13.70 
 -13  -2  -2   76.79   23.20 
  13  -2   2   21.50   13.00 
 -13   2   2   74.29   21.00 
  13   2  -2    9.70   15.40 
 -13  -2  -2   42.60   10.30 
 -13  -2  -2    9.60   14.50 
 -13  -2  -2   19.20   12.50 
 -13  -2  -2   30.40   11.70 
 -13   2   2   31.40   13.30 
 -13   2  -2   37.00   12.70 
 -13  -2   2   34.60   12.60 
  13  -2  -2   31.70   15.20 
  13  -2  -2   18.10   12.10 
 -13   2  -2  144.19   29.20 
 -13  -2   2   69.29   20.20 
  13   2   2   58.29   19.70 
 -13  -2   2   32.00   13.10 
 -13  -2   2  -39.10   23.40 
 -13   2  -2   38.30   11.50 
  13   2   2   54.49   13.00 
 -13   2  -2   29.20   15.30 
 -13  -2   2   21.90   16.60 
 -13   2  -2   42.60   12.70 
 -13  -2   2   21.10   14.50 
 -13  -2  -3   67.59   14.30 
  13  -2   3   70.39   16.10 
  13  -2   3  137.49   17.70 
 -13  -2  -3  145.39   20.80 
 -13  -2  -3   98.69   26.10 
 -13   2   3  116.89   23.90 
 -13  -2  -3  103.69   16.90 
  13   2  -3   94.79   15.80 
  13  -2   3  130.49   23.80 
 -13  -2  -3   88.49   16.20 
 -13   2   3   87.29   15.80 
 -13  -2  -3   77.79   13.90 
  13   2   3   81.89   17.50 
  13   2   3  133.09   25.70 
 -13  -2   3   92.69   20.90 
  13  -2  -3  103.19   16.10 
 -13  -2   3   81.89   19.30 
  13  -2  -3   97.09   19.50 
 -13   2  -3  108.59   20.00 
 -13  -2   3  108.99   23.90 
 -13   2  -3  114.99   17.40 
 -13   2  -3   72.49   14.80 
  13   2   3   58.59   16.30 
 -13  -2   3  133.39   19.50 
 -13  -2   3   82.89   16.40 
 -13   2  -3   77.69   15.90 
  13  -2   4   48.40   14.50 
 -13  -2  -4   57.59   25.40 
 -13   2   4   29.80   13.30 
  13  -2   4   45.00   14.10 
  13   2  -4   39.00   15.90 
 -13  -2  -4   41.20   10.50 
  13   2  -4   54.89   12.60 
 -13  -2  -4   79.49   17.20 
 -13   2   4   21.80   18.20 
 -13   2   4   33.30   21.30 
 -13  -2  -4   30.80   12.70 
  13  -2   4   83.79   23.00 
 -13  -2  -4   12.20   13.10 
 -13  -2  -4   32.10   12.00 
  13  -2  -4   62.79   17.20 
 -13  -2   4   43.80   15.10 
 -13   2  -4   34.90   12.90 
 -13   2  -4   57.29   16.20 
  13  -2  -4   38.00   13.50 
  13   2   4   78.19   23.80 
 -13   2  -4   40.10   11.60 
 -13  -2   4   40.40   18.10 
  13   2   4   44.60   15.00 
  13   2   4   18.80   14.00 
 -13   2  -4   40.50   12.90 
 -13  -2   4   39.90   13.70 
 -13  -2   4   12.10   16.70 
 -13  -2   4   71.69   22.50 
  13  -2   5   68.39   15.70 
 -13  -2  -5   93.09   18.30 
 -13   2   5   64.79   18.50 
 -13   2   5   55.29   14.00 
  13  -2   5  121.39   24.30 
 -13  -2  -5   89.49   15.40 
 -13   2   5   57.59   16.60 
  13   2  -5   47.30   17.20 
  13  -2   5   71.79   16.40 
  13   2  -5   42.00   13.30 
 -13  -2  -5   51.49   12.30 
 -13  -2  -5   45.30   11.30 
 -13  -2  -5   62.69   13.70 
 -13  -2   5   49.80   18.40 
 -13   2  -5   42.70   13.50 
 -13  -2   5   64.19   18.90 
 -13   2  -5   69.59   17.60 
  13   2   5   82.79   25.00 
 -13  -2   5   46.50   14.00 
  13  -2  -5   50.79   17.10 
 -13   2  -5   84.59   15.10 
 -13  -2   5   70.49   17.20 
  13   2   5   62.49   16.10 
  13  -2  -5   78.39   15.00 
  13   2   5   70.19   15.70 
  13  -2  -5   45.10   15.90 
 -13  -2   5   76.99   21.50 
 -13   2  -5   53.79   12.60 
  13   2  -6  115.49   19.50 
 -13  -2  -6   70.39   13.60 
  13  -2   6  117.59   22.80 
 -13   2   6   94.29   18.90 
  13  -2   6  110.09   17.40 
 -13  -2  -6   77.09   14.10 
  13  -2   6  137.79   19.30 
 -13  -2  -6  133.69   23.90 
 -13  -2  -6  130.99   16.80 
  13   2  -6   88.99   14.10 
 -13   2   6  121.49   19.60 
  13   2   6  120.49   17.20 
  13  -2  -6   71.79   16.50 
 -13  -2   6  116.49   19.10 
 -13   2  -6   98.79   15.00 
  13  -2  -6  128.49   16.50 
 -13  -2   6   78.09   18.30 
  13   2   6  105.89   17.80 
  13   2   6   94.89   23.50 
  13  -2  -6  131.09   19.30 
 -13   2  -6  114.29   15.90 
 -13   2  -6  105.09   16.00 
  13  -2   7   -2.40    9.80 
 -13   2   7    1.90   11.90 
  13  -2   7    2.60   10.10 
 -13  -2  -7   10.70    7.00 
  13   2  -7   31.40   12.10 
 -13   2   7    7.70    8.90 
  13   2  -7   21.70   10.80 
 -13   2   7   19.40   11.70 
 -13  -2  -7    0.40    7.00 
  13   2  -7    3.60    6.70 
 -13  -2  -7    7.90    8.90 
  13  -2   7    1.00   13.00 
 -13  -2   7   -5.00   11.40 
 -13   2  -7    6.60    6.80 
  13   2   7   14.90   10.30 
  13  -2  -7    3.80   10.80 
  13  -2  -7   -1.00    8.40 
 -13   2  -7   -3.00    8.20 
 -13  -2   7   -4.20   11.30 
  13   2   7   -7.70   10.50 
  13  -2  -7    4.00   10.50 
 -13   2  -7    1.50    7.90 
  13   2   7  -12.20   13.90 
 -13  -2  -8   13.30    5.70 
 -13   2   8    7.90    8.00 
  13   2  -8   22.80    9.30 
  13  -2   8   27.20    8.70 
 -13  -2  -8    4.70    6.50 
  13  -2  -8    3.80    6.90 
 -13   2  -8    9.90    5.10 
  13   2   8   17.40    7.70 
 -13  -2   8   18.90    9.70 
  13  -2  -8   11.40    7.90 
 -13   2  -8    8.10    6.20 
  13   2   8    8.50    9.10 
 -14   2   0   22.40   11.20 
 -14   2   0   24.10   13.30 
 -14   2   0   32.70   11.80 
 -14  -2   0    1.60   13.20 
 -14  -2   0    0.90   13.70 
  14  -2   0   42.00   12.40 
 -14  -2   0   13.90   19.40 
  14  -2   0   45.60   17.70 
 -14   2   0   -8.10   30.50 
 -14   2   0   17.50   12.80 
  14  -2   0   37.90   17.70 
 -14  -2   0   14.20    9.00 
  14   2   0   12.00   11.80 
 -14  -2   0   55.09   24.40 
 -14   2   1   14.70   13.80 
  14   2  -1   30.70   12.10 
  14  -2   1   87.29   19.50 
 -14  -2  -1   16.10    9.60 
 -14  -2  -1   76.59   25.40 
 -14  -2  -1   19.20   13.20 
 -14   2   1   12.00   11.70 
  14  -2   1    7.90   12.00 
 -14   2   1    8.10   13.20 
  14  -2   1   20.50   17.40 
 -14  -2  -1   28.00   13.10 
 -14   2   1   49.20   22.20 
 -14  -2  -1   60.39   19.80 
 -14  -2  -1  -12.30   13.70 
 -14   2  -1   21.80   11.50 
  14  -2  -1   44.60   17.20 
 -14  -2   1   12.50   15.00 
 -14   2  -1   39.30   12.90 
  14   2   1   20.70   18.70 
 -14  -2   1   52.89   25.20 
 -14   2  -1   17.70   11.20 
 -14  -2   1   31.90   15.80 
 -14  -2   1   23.20   12.30 
 -14   2  -1    4.30   13.50 
  14   2   1   20.20   12.00 
  14  -2  -1   19.00   11.80 
 -14  -2   1   52.29   20.10 
 -14   2  -1   22.80   13.30 
 -14  -2   1   16.00   13.50 
 -14   2   2  272.57   34.20 
 -14  -2  -2  377.46   46.40 
 -14  -2  -2  276.87   34.00 
 -14  -2  -2  289.77   32.80 
  14   2  -2  259.37   34.10 
  14   2  -2  282.07   31.90 
 -14  -2  -2  284.37   33.30 
 -14   2   2  246.98   36.60 
 -14   2   2  278.47   33.90 
  14  -2   2  275.17   32.40 
 -14  -2  -2  263.37   30.00 
  14  -2   2  334.37   38.50 
 -14   2   2  275.67   32.50 
  14   2   2  293.07   32.60 
 -14   2  -2  279.77   31.60 
 -14   2  -2  290.57   33.10 
 -14  -2   2  275.27   34.60 
  14   2   2  235.88   35.80 
  14  -2  -2  204.48   32.90 
 -14   2  -2  260.77   32.60 
 -14  -2   2  298.17   34.30 
 -14  -2   2  311.27   32.60 
 -14  -2   2  334.87   39.40 
  14  -2  -2  294.27   31.90 
 -14  -2   2  265.67   35.30 
 -14  -2  -3   67.69   16.90 
 -14   2   3   10.30   18.40 
 -14  -2  -3   48.90   14.90 
 -14  -2  -3   38.20   13.70 
 -14   2   3   59.49   14.30 
 -14  -2  -3   23.90   15.10 
 -14   2   3   52.69   22.20 
  14   2  -3   56.99   12.70 
  14  -2   3   50.29   14.30 
  14  -2   3   77.09   22.60 
 -14  -2  -3   21.40   10.40 
 -14  -2  -3  105.09   27.40 
 -14   2  -3   47.00   13.50 
 -14  -2   3   43.70   22.40 
  14   2   3   29.40   14.20 
 -14  -2   3   51.99   14.30 
 -14   2  -3   31.90   16.20 
  14   2   3  125.69   24.70 
 -14  -2   3   38.40   17.50 
  14  -2  -3   52.39   18.70 
 -14   2  -3   41.70   12.30 
  14  -2  -3   17.10   12.50 
 -14   2  -3   54.89   14.00 
 -14  -2   3   44.70   18.00 
 -14   2   4   64.89   22.30 
 -14  -2  -4   34.80   13.90 
 -14  -2  -4   16.70   10.40 
 -14  -2  -4   42.00   15.70 
 -14   2   4   65.59   14.60 
  14  -2   4   56.49   14.50 
 -14   2   4   42.10   18.20 
  14  -2   4   80.19   23.70 
 -14   2   4   41.20   13.40 
  14   2  -4   38.50   12.20 
 -14  -2  -4   56.19   13.70 
  14  -2   4   27.30   12.60 
  14   2  -4   28.60   15.50 
 -14  -2  -4   61.79   26.00 
  14  -2   4   46.40   19.40 
 -14   2  -4   49.99   16.00 
 -14  -2   4   24.60   16.70 
 -14  -2   4   40.20   14.60 
  14  -2  -4   24.70   12.60 
  14   2   4   29.60   13.50 
  14   2   4   59.39   14.70 
 -14   2  -4   31.90   13.00 
 -14  -2   4   68.09   21.50 
 -14  -2   4   35.40   17.30 
  14  -2  -4   34.30   15.90 
  14   2   4   88.99   24.70 
 -14   2  -4   44.60   13.70 
 -14   2  -4   34.10   11.50 
 -14  -2   4   61.19   14.20 
 -14  -2  -5   15.30   10.80 
  14   2  -5   34.20   13.60 
  14  -2   5   21.10   12.70 
  14   2  -5    4.10    9.80 
  14  -2   5    5.90   12.10 
 -14  -2  -5    5.60   13.40 
 -14   2   5    9.40   12.50 
 -14  -2  -5    8.50    8.50 
 -14   2   5   11.10   15.20 
 -14   2   5   30.90   12.80 
 -14  -2  -5   19.00   12.00 
  14  -2   5   19.20   19.40 
 -14   2  -5    6.60   13.90 
  14   2   5   34.50   13.10 
  14  -2  -5   21.30   11.70 
 -14  -2   5    8.80   14.10 
 -14   2  -5    2.70   11.40 
  14  -2  -5   33.60   15.50 
 -14   2  -5   14.90    9.70 
  14   2   5   30.00   20.30 
 -14  -2   5   24.20   19.70 
 -14   2  -5   26.90   11.80 
 -14  -2   5   29.00   12.90 
  14  -2  -5   14.10   13.50 
  14   2   5   -1.60   12.40 
 -14  -2  -6   47.10   11.40 
  14  -2   6   43.80   17.90 
 -14  -2  -6   53.89   11.60 
 -14  -2  -6   47.30    9.10 
  14   2  -6   49.60   14.40 
  14  -2   6   49.50   12.30 
  14  -2   6   54.69   13.10 
  14   2  -6   21.20    8.60 
 -14   2   6   48.90   14.00 
 -14   2   6   38.70    8.70 
 -14   2   6   49.70   14.90 
  14  -2  -6   33.60   10.10 
  14  -2  -6   22.50   13.80 
 -14  -2   6   49.10   13.10 
  14  -2  -6   52.49   13.60 
  14   2   6   47.10   12.60 
 -14   2  -6   25.90    9.50 
  14   2   6   32.10   12.10 
 -14  -2   6   35.60   14.30 
  14   2   6   52.09   17.80 
 -14   2  -6   48.60   11.20 
 -14   2  -6   38.40   11.30 
  14  -2   7   25.80    9.40 
 -14   2   7   23.50   10.40 
  14   2  -7   26.60    9.40 
 -14  -2  -7   27.80    7.30 
  14   2  -7   26.40    6.40 
 -14  -2  -7   18.10    6.50 
  14  -2   7   42.80    9.20 
 -14   2   7   22.20    9.70 
  14  -2   7   41.50   11.60 
 -14  -2  -7   31.90    8.40 
  14   2  -7   18.20   10.00 
 -14   2  -7   13.40    7.60 
 -14   2  -7   26.70    7.40 
  14   2   7   22.20    9.90 
 -14   2  -7   32.30    8.00 
  14  -2  -7   20.40    9.20 
 -14  -2   7   20.30   10.40 
  14  -2  -7   32.00    8.20 
  14   2   7   18.10   11.40 
  14  -2  -7    5.10    8.80 
 -14  -2   7   24.70   10.60 
  14   2   7   20.70    9.10 
  15  -2   0   44.30   19.30 
 -15   2   0   -1.60   11.80 
 -15  -2   0  -12.00   13.40 
 -15   2   0  -20.30   13.40 
  15   2   0    4.40   11.80 
 -15   2   0    6.30   10.50 
 -15  -2   0   -4.80   14.40 
 -15  -2   0   65.09   28.00 
 -15  -2   0   -0.30   19.20 
  15  -2   0    2.40   11.90 
 -15   2   0  -11.90   12.70 
 -15  -2  -1  205.98   25.80 
 -15   2   1  234.68   29.80 
 -15   2   1  215.78   33.20 
  15   2  -1  264.57   28.40 
 -15  -2  -1  193.98   28.80 
  15  -2   1  327.87   34.40 
  15  -2   1  217.38   27.40 
 -15  -2  -1  246.78   32.50 
 -15   2   1  213.68   28.50 
  15   2  -1  239.58   31.60 
 -15  -2  -1  214.68   28.40 
 -15  -2  -1  218.28   28.40 
 -15  -2  -1  407.06   50.49 
 -15   2   1  229.98   28.50 
  15  -2   1  180.48   30.20 
 -15   2  -1  223.78   28.50 
 -15  -2   1  263.37   31.50 
  15  -2  -1  288.27   29.10 
 -15   2  -1  221.28   27.40 
 -15  -2   1  290.17   31.30 
  15   2   1  188.58   31.40 
 -15   2  -1  212.98   28.10 
  15  -2  -1  276.37   32.00 
 -15  -2   1  288.47   31.40 
 -15  -2   1  285.37   29.40 
 -15  -2   1  241.38   33.80 
 -15   2  -1  202.38   28.50 
  15   2   1  245.18   27.60 
 -15   2  -1  205.88   28.10 
 -15   2   2  115.09   19.60 
 -15   2   2  121.09   19.80 
 -15   2   2   88.29   17.20 
 -15   2   2  112.69   21.90 
  15   2  -2   74.49   19.30 
  15   2  -2   66.59   15.40 
 -15  -2  -2  115.99   17.40 
 -15  -2  -2   97.99   14.70 
  15  -2   2  116.49   23.40 
  15  -2   2  110.09   17.20 
 -15   2   2  107.79   25.20 
 -15  -2  -2   79.99   17.60 
 -15  -2  -2  105.89   19.80 
 -15  -2   2  130.29   25.80 
 -15  -2   2  104.29   20.60 
 -15   2  -2   84.69   18.50 
  15   2   2  111.29   16.80 
  15  -2  -2   90.49   19.20 
 -15  -2   2   95.19   20.20 
  15   2   2  109.99   23.90 
 -15   2  -2   80.89   17.50 
  15  -2  -2   91.09   16.40 
 -15  -2   2  109.49   17.80 
 -15   2  -2  107.79   16.90 
 -15   2  -2  114.49   18.60 
 -15  -2  -3    8.30   13.00 
  15  -2   3   22.10   18.70 
 -15  -2  -3    9.80    9.10 
 -15  -2  -3   19.80   12.40 
 -15   2   3    9.80   16.60 
 -15  -2  -3  -20.80   13.40 
 -15   2   3   48.20   21.60 
 -15   2   3    6.80   12.30 
 -15  -2  -3   79.39   28.00 
  15  -2   3   32.90   13.40 
 -15  -2  -3   37.00   17.50 
  15   2  -3   19.90   10.70 
  15  -2   3   65.49   19.70 
 -15   2  -3   27.30   15.00 
  15   2   3   24.60   13.00 
  15   2   3    6.90   21.20 
 -15   2  -3   -3.60   10.10 
  15  -2  -3   17.40   11.50 
 -15   2  -3   15.80   15.10 
 -15  -2   3   42.80   20.90 
 -15   2  -3   23.00   12.40 
 -15   2  -3    6.80   13.10 
 -15  -2   3   10.90   16.60 
 -15  -2   3    5.50   15.50 
  15  -2  -3   35.10   17.00 
 -15  -2   3   21.20   12.70 
  15   2  -4    4.40   13.90 
 -15   2   4  -11.00   14.60 
 -15  -2  -4    9.70   11.90 
 -15   2   4   17.00   12.00 
 -15  -2  -4   28.80   11.70 
  15  -2   4   40.00   13.00 
  15   2  -4   -6.10    9.60 
 -15  -2  -4   18.30    8.90 
  15  -2   4   21.20   17.50 
  15  -2   4   27.50   17.60 
 -15   2   4   11.00   11.00 
  15  -2   4   15.20   10.30 
 -15  -2  -4    0.20   12.30 
 -15  -2  -4   26.70   15.20 
 -15  -2   4    4.00   14.50 
 -15   2  -4   23.10   11.90 
 -15   2  -4   39.90   15.00 
  15   2   4   10.70   11.00 
  15   2   4   33.70   20.80 
 -15  -2   4    5.30   18.60 
  15  -2  -4    0.60   10.80 
 -15  -2   4   10.80   15.20 
  15   2   4   19.80   12.30 
  15  -2  -4   21.40   14.70 
 -15   2  -4   20.30   10.60 
 -15   2  -4   -5.30   11.20 
 -15  -2   4   17.00   12.90 
  15  -2   5    6.80   11.40 
 -15  -2  -5  -13.90    9.90 
  15   2  -5    1.10   12.40 
  15  -2   5   24.90   17.80 
 -15   2   5    9.00   11.10 
 -15   2   5   10.90   13.80 
 -15   2   5   29.10   11.80 
  15   2  -5   31.70   13.70 
  15  -2   5   25.80   10.10 
  15   2  -5   14.90    8.90 
 -15  -2  -5    3.60   10.80 
 -15  -2  -5    7.40    7.70 
 -15  -2  -5    9.00    9.70 
 -15  -2   5   23.50   10.50 
  15   2   5   19.70   17.90 
  15  -2  -5   22.80   12.60 
 -15  -2   5    6.10   12.20 
 -15   2  -5   15.60   10.70 
  15   2   5   15.30   11.30 
  15   2   5   -3.80    9.80 
  15  -2  -5    4.80   11.60 
  15  -2  -5   23.20   10.30 
 -15   2  -5   -5.70    8.20 
 -15   2  -5   15.10   10.60 
 -15  -2  -6    8.30    7.90 
 -15  -2  -6    2.40    9.00 
  15   2  -6    4.80    6.10 
 -15   2   6   -7.00   10.80 
  15  -2   6   11.50    9.30 
  15   2  -6    9.20   10.60 
  15  -2   6    7.00    8.60 
 -15  -2  -6    6.70    6.30 
 -15   2   6   -0.20    9.00 
  15  -2   6   10.80   12.70 
 -15   2  -6   11.20    7.70 
  15   2   6   15.30    9.20 
 -15   2  -6   -6.30    7.90 
  15   2   6   22.90   14.00 
  15   2   6    7.20    9.00 
  15  -2  -6   11.00    7.80 
 -15   2  -6    3.90    8.30 
  15  -2  -6   18.30   10.20 
 -15  -2   6   17.20    9.60 
 -15  -2   6   13.10   11.40 
 -15  -2  -7   11.60    7.60 
  15  -2  -7    1.40    6.50 
  15   2   7    4.70   11.80 
 -15   2  -7    5.10    5.70 
  16   2   0   91.89   20.40 
  16  -2   0   65.49   20.00 
  16   2   0   75.59   14.80 
 -16   2   0   78.69   16.80 
 -16   2   0   86.39   17.10 
 -16  -2   0   86.79   18.10 
 -16  -2   0   77.39   22.30 
 -16   2   0  111.49   19.40 
 -16   2   0   85.39   15.30 
  16  -2   0   81.79   15.10 
 -16  -2   0   74.99   17.10 
  16  -2   1   28.60   12.60 
 -16  -2  -1   19.60   13.90 
 -16   2   1   26.60   14.40 
 -16   2   1   35.40   21.60 
 -16   2   1   26.30   16.10 
  16  -2   1    8.40   15.10 
  16   2  -1   16.70   11.50 
 -16  -2  -1   18.30   24.90 
 -16   2   1   11.50   14.40 
 -16  -2  -1   47.40   14.90 
 -16   2   1   27.00   13.20 
  16  -2   1   69.39   18.80 
  16   2  -1   32.50   17.00 
 -16   2  -1    9.00   13.80 
  16  -2  -1   24.00   16.50 
 -16   2  -1   12.90   10.90 
 -16  -2   1   31.20   15.10 
 -16  -2   1   22.60   14.50 
 -16  -2   1   50.69   14.80 
  16   2   1   43.50   17.50 
 -16   2  -1   23.10   13.00 
 -16  -2   1   29.20   20.70 
  16   2   1   19.50   11.50 
  16  -2  -1   45.00   12.40 
 -16  -2   1   30.30   13.20 
 -16   2   2   37.10   15.40 
 -16   2   2   15.30   16.30 
  16  -2   2   30.00   16.60 
  16   2  -2   31.60   14.80 
 -16   2   2   34.00   13.10 
  16  -2   2   72.99   19.80 
 -16  -2  -2   12.40   13.50 
 -16   2   2   35.10   20.30 
  16  -2   2   20.90   12.10 
  16   2  -2   24.40   10.40 
 -16  -2  -2  -22.70   12.40 
 -16  -2  -2   15.30   14.00 
 -16  -2  -2   18.60    8.50 
  16   2   2   36.30   17.50 
 -16   2  -2   13.20   12.30 
  16  -2  -2   39.30   16.40 
 -16  -2   2   24.30   12.80 
 -16   2  -2   19.70   13.90 
  16  -2  -2   28.90   11.50 
 -16  -2   2   38.10   15.40 
  16   2   2   19.90   11.70 
 -16   2  -2   25.70   10.60 
  16  -2  -2   29.30   13.90 
 -16   2  -2   21.30   12.20 
 -16  -2   2   85.39   20.90 
 -16  -2   2    8.50   15.00 
  16  -2   3   32.60   18.10 
 -16  -2  -3   28.30   13.00 
 -16   2   3   18.80   18.30 
 -16  -2  -3   -0.50   11.90 
  16  -2   3   15.20   11.70 
  16   2  -3   50.89   15.70 
 -16  -2  -3    7.40    8.10 
  16  -2   3   15.20   16.40 
 -16   2   3  -13.90   14.90 
  16   2  -3   30.80   10.20 
 -16   2   3   -5.40   11.80 
 -16  -2  -3    9.30   13.10 
 -16  -2   3   15.40   14.40 
 -16   2  -3  -11.90   12.40 
 -16  -2   3   28.50   19.90 
 -16   2  -3   13.20   10.10 
 -16   2  -3   -0.90   11.20 
  16   2   3    3.30   11.30 
 -16   2  -3    9.40   11.70 
  16  -2  -3   33.50   15.90 
 -16  -2   3    8.10   14.60 
 -16  -2   3   20.00   12.90 
  16  -2  -3    9.00   10.40 
  16   2   3   37.90   18.70 
 -16  -2  -4  -11.50   11.50 
  16  -2   4   15.10   15.60 
 -16   2   4   -3.20   11.00 
 -16   2   4    6.50   13.90 
 -16  -2  -4   11.80   11.30 
 -16  -2  -4   -0.70    7.10 
  16  -2   4    2.10   15.40 
  16   2  -4    9.90   12.30 
  16  -2   4   23.30   11.20 
  16   2  -4   -2.40    8.60 
 -16  -2  -4   19.20   10.70 
 -16   2  -4    8.30    8.60 
  16   2   4    6.40   16.90 
 -16  -2   4   11.70   16.20 
  16  -2  -4   33.60   10.00 
  16  -2  -4   17.60   13.80 
 -16   2  -4    3.50   10.50 
 -16   2  -4    6.30   10.30 
 -16  -2   4   14.30   11.80 
  16  -2  -4   14.80   13.50 
  16   2   4   -7.50   15.70 
 -16   2  -4   -2.70   10.70 
 -16  -2   4   21.50   13.90 
 -16  -2   4   -2.10   13.30 
  16   2   4    6.90   11.10 
  16  -2   5   28.40   14.70 
  16  -2   5    1.80    8.20 
 -16   2   5   31.30   10.10 
 -16  -2  -5   27.00    9.10 
 -16  -2  -5   22.40    6.90 
  16   2  -5   37.60   12.20 
 -16   2   5   19.90    8.70 
  16   2  -5   21.20    7.70 
 -16   2   5   22.80   11.60 
 -16  -2  -5   25.40    9.70 
 -16  -2  -5   22.50   10.00 
  16  -2   5   13.70   10.10 
  16   2   5   30.00    8.00 
  16   2   5   33.60   16.00 
  16   2   5   35.60   10.50 
 -16  -2   5   34.50   13.00 
 -16   2  -5   28.30    8.30 
 -16   2  -5   19.90    9.60 
 -16   2  -5   12.30    9.80 
 -16   2  -5   24.40    9.10 
  16  -2  -5   12.50    9.80 
  16  -2  -5   23.80   11.00 
  16   2   5    3.70   13.30 
  16  -2  -5    9.30    8.40 
  16   2  -6    9.80    8.50 
  16  -2   6    6.90   11.10 
  16  -2   6  -15.20    7.60 
 -16   2   6   11.90    9.00 
 -16  -2  -6   20.10    6.80 
 -16  -2  -6    8.70    7.40 
  16  -2   6   15.20   10.80 
 -16   2  -6   15.90    7.60 
 -16  -2   6   14.50    8.30 
  16  -2  -6    3.80    5.90 
  16   2   6   10.30    9.50 
 -16   2  -6    5.20    7.10 
 -16   2  -6   11.50    6.00 
  16   2   6   -8.40   10.60 
  16   2   6   -0.80    7.40 
 -16   2  -6    8.10    8.80 
  16  -2  -6    3.40    7.90 
  17  -2   0   19.20   15.80 
  17   2   0    4.50   10.20 
 -17  -2   0    6.70   18.20 
 -17   2   0    7.50   12.60 
 -17   2   0  -12.50   11.80 
  17  -2   0   19.10   11.30 
  17   2   0    0.80   16.20 
 -17  -2   0   16.10   13.20 
 -17   2   0   -1.20   11.10 
 -17  -2   0    7.60   12.60 
 -17  -2  -1   33.10   13.90 
 -17  -2  -1   58.79   14.70 
  17  -2   1   48.50   15.20 
  17   2  -1   67.09   15.70 
  17  -2   1   58.59   12.80 
 -17   2   1   76.49   14.40 
 -17   2   1   84.19   16.20 
 -17   2   1   51.79   21.80 
 -17   2   1   59.29   15.30 
 -17   2   1   70.39   15.40 
  17  -2   1   71.19   18.10 
  17   2  -1   48.00   11.80 
 -17   2  -1   56.49   14.50 
  17  -2  -1   58.29   16.60 
  17  -2  -1   37.90   16.70 
 -17  -2   1   48.10   12.70 
 -17  -2   1   38.50   19.70 
 -17   2  -1   62.19   14.90 
 -17  -2   1   57.49   15.70 
  17  -2  -1   63.09   12.80 
  17   2   1   70.59   18.80 
  17   2   1   52.79   12.30 
 -17  -2  -2   22.90   12.90 
 -17   2   2   -6.00   17.40 
  17  -2   2   10.90   14.10 
  17  -2   2    7.00   17.30 
  17   2  -2   18.30    9.30 
  17  -2   2   18.20   10.90 
 -17  -2  -2    8.00   11.30 
 -17   2   2   18.90   13.60 
 -17   2   2    7.70   11.80 
  17  -2  -2    0.60   14.90 
 -17  -2   2    0.50   10.90 
 -17   2  -2   -7.80   12.50 
 -17  -2   2    3.20   17.80 
  17  -2  -2   11.20    9.70 
 -17  -2   2   20.60   13.40 
  17   2   2    6.60   14.40 
  17   2   2   37.60   18.10 
  17  -2  -2   23.30   12.20 
 -17  -2   2   18.30   14.10 
 -17   2  -2    8.00    8.90 
 -17   2  -2   11.40   12.80 
  17   2   2    3.30   10.00 
 -17  -2  -3   20.80   11.40 
  17   2  -3   14.60    9.40 
 -17  -2  -3   13.90   11.30 
  17  -2   3    8.60   14.50 
  17   2  -3    3.90   14.00 
 -17  -2  -3   13.20   11.30 
  17  -2   3   12.80   10.50 
 -17   2   3   15.20   11.40 
 -17   2   3   17.40   13.70 
  17  -2   3   18.10   14.60 
 -17   2  -3   20.10    8.70 
 -17   2  -3   -2.80   10.70 
 -17   2  -3   18.50   11.10 
 -17  -2   3   41.60   16.70 
  17   2   3   26.50   10.40 
 -17  -2   3   28.70   13.00 
 -17  -2   3    9.10   12.90 
  17   2   3   16.60   15.90 
  17  -2  -3   -1.40   12.70 
  17   2   3   23.80   16.40 
 -17   2  -3   10.60   10.20 
  17  -2  -3   31.00    9.80 
 -17  -2   3   24.00   11.70 
 -17  -2  -4   33.20   10.70 
 -17   2   4   21.00    9.90 
  17  -2   4   28.20   14.70 
 -17  -2  -4   39.50   10.40 
 -17  -2  -4   35.00   11.10 
  17   2  -4   36.20   11.50 
  17  -2   4   24.80   13.00 
 -17   2   4   37.70   12.90 
  17  -2   4   39.40   10.40 
 -17   2  -4   36.40   10.10 
  17   2   4   57.89   10.70 
  17   2   4   44.40   15.80 
  17  -2  -4   25.70   11.30 
 -17   2  -4   24.80    9.70 
 -17  -2   4   23.20   11.90 
  17  -2  -4   38.50    9.50 
 -17   2  -4   36.20    8.50 
  17   2   4   34.60   14.70 
 -17   2  -4   22.00   10.20 
  17  -2  -4   36.60   11.60 
  17   2  -5    3.90    8.30 
 -17  -2  -5    9.10    7.70 
 -17   2   5    9.20    8.80 
  17  -2   5    9.50   11.20 
 -17  -2  -5   21.10    7.50 
  17  -2   5   24.40    8.00 
 -17  -2   5    1.40    9.50 
  17  -2  -5   -1.00    8.70 
 -17   2  -5    2.20    7.20 
  17  -2  -5    3.30    9.10 
  17   2   5    2.90   10.80 
 -17   2  -5    3.60    5.90 
  17  -2  -5   -4.50    5.90 
 -17   2  -5   16.30    8.00 
  17   2   5   22.60    8.10 
 -17   2  -5    9.00    7.40 
  18   2   0   23.00    9.60 
 -18  -2   0  -24.80   17.40 
 -18   2   0  -15.00   10.40 
  18   2   0   13.00   13.00 
  18  -2   0   -0.80   13.00 
 -18   2   0   11.50   10.90 
  18  -2   0   -0.30   13.50 
 -18  -2   0    7.90   11.80 
  18  -2   0    6.00    9.70 
 -18  -2  -1   47.90   13.20 
  18  -2   1   42.40   14.40 
 -18   2   1   53.19   13.00 
  18   2  -1   36.20   13.00 
 -18  -2  -1   47.30   13.70 
  18   2  -1   30.60    9.40 
  18  -2   1   36.90   10.70 
  18  -2   1   56.99   16.20 
 -18   2   1   63.09   12.40 
 -18   2   1   39.00   11.90 
  18   2   1   61.59   16.10 
 -18  -2   1   36.70   12.90 
  18   2   1   29.60   10.10 
  18  -2  -1   25.20   10.30 
  18  -2  -1   35.50   14.40 
 -18  -2   1   42.40   17.80 
  18  -2  -1   24.60   13.20 
 -18   2  -1   47.20   12.40 
 -18   2  -1   51.49   12.90 
 -18  -2  -2   35.40   11.60 
  18   2  -2   39.30   10.00 
 -18  -2  -2   27.50   11.70 
  18  -2   2   43.20   10.50 
  18   2  -2   33.50   13.30 
 -18   2   2   37.60   10.90 
  18  -2   2   44.60   13.10 
  18  -2   2  -10.40   13.00 
  18  -2   2   75.89   15.80 
 -18   2   2   37.90   12.80 
 -18   2  -2   44.70   12.10 
  18  -2  -2   40.70   10.00 
  18   2   2   44.70   14.80 
 -18  -2   2   53.99   11.80 
 -18  -2   2   34.00   16.60 
 -18  -2   2   65.39   13.40 
 -18  -2   2   45.90   13.10 
  18  -2  -2   29.60   11.10 
  18  -2  -2   46.10   14.30 
  18   2   2   14.00   12.40 
 -18   2  -2   55.19   12.10 
  18   2   2   49.50   10.30 
 -18  -2  -3   44.10   10.30 
  18  -2   3   23.80   11.00 
 -18   2   3   35.30   10.30 
  18  -2   3   32.00    9.50 
 -18  -2  -3   17.90    9.60 
  18   2  -3   -3.10   11.10 
 -18   2   3   40.20   11.40 
  18  -2   3   24.90   13.30 
 -18  -2   3   44.70   11.90 
  18   2   3   37.10   13.60 
  18   2   3   18.70    9.00 
  18  -2  -3   33.00   11.30 
 -18   2  -3   26.00   10.10 
  18  -2  -3   23.70    8.40 
 -18   2  -3   18.60    9.80 
  18  -2  -3   29.00   11.50 
  18   2   3   28.50   12.70 
 -18  -2   3   48.00   15.10 
 -18   2  -3   23.30    6.90 
 -18  -2   3   47.30   11.50 
 -18  -2  -4   17.00    8.00 
 -18   2   4   23.90    9.30 
  18  -2   4   17.00    7.40 
  18   2  -4   23.90    9.90 
  18   2  -4   -4.50    9.40 
  18  -2   4   20.70    9.80 
  18  -2  -4    3.00    8.40 
 -18   2  -4   20.80    8.10 
 -18   2  -4    5.60    5.80 
 -18  -2   4   12.40   10.10 
  18  -2  -4   -6.20    9.10 
  18   2   4    9.20   10.90 
  18  -2  -4    0.00    6.20 
  18   2   4    2.80    7.50 
 -18   2  -4    7.20    7.80 
  18   2   4   28.20   10.80 
 -19   2   0   37.10   10.00 
 -19  -2   0   33.00   10.80 
  19  -2   0   17.60   11.50 
  19   2   0   36.20   11.60 
  19   2   0   29.70    7.80 
  19  -2   0   31.50    8.60 
  19  -2   0   23.70   11.80 
  19   2   0   21.50   12.70 
  19  -2   1    3.50    7.90 
  19   2  -1    4.10   11.30 
 -19   2   1    8.20    7.40 
  19  -2   1    6.00   10.80 
  19   2  -1   11.20    9.00 
 -19  -2  -1    8.90    9.70 
  19  -2   1  -15.20    9.80 
  19   2  -1    5.90    8.30 
  19   2   1    2.80   11.70 
 -19  -2   1    4.30   12.70 
  19  -2  -1    5.30    9.20 
 -19   2  -1    0.50    8.60 
  19   2   1   -0.90    7.30 
 -19  -2   1    2.80    9.90 
  19  -2  -1   -8.90    9.90 
 -19   2  -1    4.00    8.70 
  19  -2  -1    1.90    7.00 
 -19   2   2   32.80    8.60 
  19  -2   2   52.99   12.20 
  19  -2   2   33.30    8.10 
 -19  -2  -2   29.20    9.00 
  19   2  -2   22.50   10.70 
 -19  -2  -2   21.20    8.50 
 -19   2   2   53.59   12.50 
 -19   2  -2   31.00    9.40 
  19  -2  -2   14.70    9.60 
  19  -2  -2   14.40   10.80 
  19   2   2   24.60   12.00 
  19  -2  -2   28.40    7.50 
 -19  -2   2   17.30   10.50 
 -19   2  -2   13.10    8.50 
  19   2   2   17.20    7.60 
 -19  -2  -3   -0.40    8.10 
  19  -2   3    4.30    7.70 
  19   2  -3   14.90   13.10 
 -19   2  -3    6.10   11.80 
  19  -2  -3    1.90    8.60 
 -19   2  -3    9.40    9.00 
  19   2   3   -9.30   13.10 
   0  -3   0    0.00    2.00 
   0  -3   0   -1.50    2.30 
   0   3   1  387.96   38.60 
   0  -3  -1  430.26   39.20 
   0  -3   1  389.56   39.10 
   0  -3  -1  411.06   39.20 
   0   3   1  371.46   39.00 
   0  -3   1  412.46   39.40 
   0  -3  -1  396.36   39.70 
   0  -3   1  387.06   38.90 
   0  -3   1  404.46   39.00 
   0   3   2 6963.90  678.93 
   0  -3  -2 7495.25  679.23 
   0  -3  -2 6572.14  679.43 
   0  -3   2 6765.12  679.23 
   0  -3   2 7324.37  679.03 
   0  -3   2 7395.16  679.33 
   0  -3  -3   54.79   10.80 
   0  -3  -3   46.70    9.20 
   0   3   3   56.79    9.40 
   0  -3   3   56.39   10.90 
   0   3  -3   58.19    9.70 
   0   3  -4 1351.96  128.99 
   0  -3   4 1344.87  130.29 
   0   3  -4 1375.06  130.79 
   0  -3  -4 1267.47  129.79 
   0  -3  -4 1214.28  127.69 
   0  -3  -4 1393.56  129.09 
   0  -3  -5  140.19   19.60 
   0   3  -5  147.09   24.00 
   0  -3   5  124.49   20.80 
   0   3  -5  132.89   19.10 
   0  -3   6   39.70   10.30 
   0  -3  -6   70.19   12.30 
   0   3   6   53.39   11.90 
   0  -3   6   53.49   11.20 
   0  -3  -6   62.89   10.50 
   0  -3  -6   65.79   12.80 
   0   3  -6   60.19   12.70 
   0   3  -6   74.19   18.80 
   0  -3  -6   53.89   10.80 
   0  -3   6   51.49   16.70 
   0  -3  -6   36.30   13.20 
   0   3  -6   49.40   10.10 
   0   3   6   48.10   11.60 
   0   3   7  187.38   23.30 
   0   3  -7  206.28   23.70 
   0   3   7  192.28   22.10 
   0  -3   7  159.58   21.60 
   0  -3  -7  178.98   21.70 
   0  -3  -7  174.78   22.70 
   0  -3  -7  158.68   22.10 
   0  -3   7  179.98   22.30 
   0   3  -7  179.68   20.80 
   0  -3  -7  192.68   21.90 
   0   3  -7  165.98   22.00 
   0  -3   7  151.48   25.90 
   0  -3  -7  149.79   20.30 
   0  -3  -8  115.19   13.90 
   0   3  -8  104.09   17.00 
   0   3  -8   60.29   12.50 
   0  -3  -8   76.89   15.90 
   0   3  -8   63.09   14.40 
   0  -3  -8   90.19   14.00 
   0  -3   8   70.99   14.90 
   0  -3  -8   55.39   14.30 
   0  -3   8   69.99   14.60 
   0  -3   8   61.09   14.60 
   0   3   8   59.79   14.40 
   0   3   8   61.19   16.10 
   0  -3  -8   82.59   13.60 
   0   3  -9   19.80   10.10 
   0  -3  -9   25.30    9.10 
   0   3   9   24.80   12.10 
   0  -3   9   20.00   11.10 
   0  -3  -9   10.90    8.70 
   0  -3   9   23.20   11.10 
   0  -3   9   10.80   10.80 
   0  -3  -9   23.20   11.40 
   0   3  -9   14.50   12.60 
   0   3   9    4.80   10.60 
   0   3  -9   12.30    8.80 
   0  -3  -9    3.20    8.60 
   0   3 -10   -6.40    7.70 
   0  -3  10  -11.60    6.80 
   0  -3 -10   -7.40    6.90 
   0   3 -10    2.50    6.30 
   0   3  10   -6.30    7.50 
   0   3 -10    4.30    6.20 
   0  -3 -10    1.80   10.50 
   0   3  10   -2.20    8.60 
   0  -3  10    1.90    8.60 
   0  -3  10   -1.90    8.30 
   0  -3 -10   -2.50    6.40 
   1  -3   0   19.00    6.10 
   1  -3   0   18.80    2.90 
   1  -3   0   14.80    3.10 
   1  -3   0   13.90    2.90 
  -1  -3   0   12.90    2.90 
  -1  -3   0   17.20    4.20 
  -1  -3  -1 1310.97  119.19 
   1   3  -1 1305.07  119.29 
  -1  -3  -1 1247.08  118.89 
   1  -3   1 1215.38  118.99 
  -1  -3  -1 1200.78  119.29 
  -1  -3  -1 1250.87  119.19 
   1  -3   1 1147.39  119.19 
  -1  -3   1 1247.98  119.19 
  -1  -3   1 1267.97  119.49 
   1  -3  -1 1148.89  119.99 
   1   3   1 1232.28  119.09 
   1  -3  -1 1216.38  119.19 
  -1  -3   1 1262.77  119.49 
   1   3   1 1243.48  118.99 
   1  -3  -1 1273.17  119.39 
  -1  -3  -2  141.59   18.30 
   1  -3   2  189.88   19.30 
   1   3  -2  156.58   18.90 
   1  -3   2  193.08   18.50 
  -1  -3  -2  172.08   18.60 
   1  -3  -2  172.98   20.50 
   1   3   2  161.48   18.30 
  -1  -3   2  176.68   20.50 
  -1   3  -2  176.18   18.50 
   1  -3  -2  180.98   19.10 
   1   3  -3  303.87   30.10 
   1  -3   3  301.87   30.60 
  -1  -3  -3  296.77   29.70 
  -1  -3  -3  251.67   29.70 
  -1   3  -3  282.07   29.70 
  -1  -3   3  294.27   32.10 
   1  -3  -3  282.87   30.20 
   1   3   3  284.07   29.70 
   1  -3  -3  275.87   31.50 
   1  -3   4  146.99   20.40 
  -1  -3  -4  114.49   16.00 
   1   3  -4  134.09   22.70 
  -1  -3  -4  135.39   17.90 
   1   3  -4  126.69   18.10 
  -1  -3  -4  136.49   18.50 
  -1   3  -4  141.79   17.90 
   1  -3  -4  123.59   20.80 
   1   3   4  128.59   18.30 
  -1   3  -4  142.29   16.10 
   1  -3  -4  140.89   18.90 
  -1  -3   4  126.79   19.20 
   1   3  -5   98.69   15.50 
   1   3  -5  105.59   21.20 
  -1  -3  -5   85.69   14.40 
  -1   3  -5   98.59   14.80 
  -1  -3   5   84.49   18.20 
   1  -3  -5   82.19   14.80 
  -1   3  -5  104.99   18.70 
   1  -3  -5  124.99   20.70 
   1  -3   6   21.80   13.60 
  -1  -3  -6   32.40    9.10 
  -1  -3  -6   28.20   10.80 
   1   3  -6   34.60   10.60 
   1  -3   6   25.80    9.70 
  -1  -3  -6   24.20   10.10 
  -1   3   6    3.70    9.70 
  -1  -3  -6   31.10    8.80 
  -1  -3  -6   30.10    9.90 
   1  -3   6   15.80    9.40 
   1   3  -6   14.30    8.40 
   1   3  -6   37.10   17.10 
  -1   3   6   26.60   10.10 
   1  -3  -6   27.60    9.10 
   1   3   6   27.00    9.80 
   1  -3  -6   14.70   10.10 
  -1  -3   6   22.20    9.80 
  -1   3  -6   36.20   11.40 
   1  -3  -6    2.50   11.10 
  -1   3  -6   29.40   10.50 
  -1  -3   6   -7.60   12.80 
   1   3   6   24.50   10.50 
  -1   3  -6   15.60    7.00 
   1  -3  -6   18.00   10.00 
  -1  -3   6   25.90    9.00 
   1  -3  -6   22.00   11.30 
   1   3  -7  188.58   19.90 
  -1   3   7  156.48   21.60 
  -1  -3  -7  156.58   20.60 
   1  -3   7  150.58   21.00 
  -1  -3  -7  150.18   19.90 
  -1  -3  -7  161.68   19.20 
  -1  -3  -7  161.08   20.40 
  -1   3   7  185.58   22.00 
   1   3  -7  188.68   22.80 
   1  -3   7  143.59   20.60 
  -1  -3  -7  165.28   21.20 
   1   3  -7  143.99   20.60 
  -1   3  -7  198.88   22.60 
   1  -3  -7  159.68   21.80 
   1  -3  -7  133.09   21.10 
  -1  -3   7  140.99   24.30 
  -1   3  -7  155.68   19.00 
  -1  -3   7  157.38   20.60 
   1  -3  -7  153.08   19.40 
  -1   3  -7  148.29   20.30 
   1  -3  -7  133.89   20.10 
   1   3   7  194.98   22.20 
   1   3   7  123.69   20.60 
  -1  -3   7  174.78   21.10 
   1  -3  -7  186.48   21.20 
   1   3  -8  228.58   24.00 
   1  -3   8  230.08   24.30 
  -1   3   8  182.98   23.70 
  -1  -3  -8  156.48   22.00 
  -1  -3  -8  189.88   23.50 
  -1  -3  -8  138.79   21.60 
  -1   3   8  148.89   22.60 
   1  -3   8  188.58   22.90 
   1   3  -8  217.78   22.10 
  -1  -3  -8  179.18   21.30 
  -1  -3  -8  157.18   21.10 
   1  -3   8  131.09   22.30 
   1   3  -8  199.18   24.50 
   1  -3  -8  139.19   21.60 
   1  -3  -8  219.78   22.20 
  -1   3  -8  193.68   23.20 
  -1   3  -8  183.48   23.40 
  -1  -3   8  170.98   22.70 
   1  -3  -8  158.78   22.10 
  -1  -3   8  219.38   24.20 
   1   3   8  159.08   23.40 
   1   3   8  200.48   24.40 
   1  -3  -8  173.68   23.30 
  -1  -3   8  200.38   23.30 
   1  -3  -8  177.98   22.50 
  -1   3  -8  145.39   22.20 
  -1   3  -8  203.18   22.40 
   1  -3   9   51.69   13.00 
   1   3  -9   88.09   14.30 
  -1  -3  -9   57.69   12.20 
   1   3  -9  111.89   16.20 
   1   3  -9   85.39   11.90 
  -1   3   9   61.99   13.50 
  -1  -3  -9   65.39   12.20 
  -1  -3  -9   67.89   12.50 
  -1   3   9   67.29   14.60 
  -1  -3  -9   89.09   12.00 
   1  -3   9   59.59   13.50 
   1   3   9   45.80   13.30 
  -1  -3   9   50.29   12.60 
   1  -3  -9   81.29   12.20 
  -1   3  -9   96.79   12.30 
   1  -3  -9  101.09   15.00 
  -1   3  -9   65.49   14.00 
  -1  -3   9   90.29   14.40 
  -1   3  -9   46.50   11.70 
   1   3   9   62.89   14.40 
  -1  -3   9   76.39   14.10 
   1  -3  -9   39.30   11.50 
   1  -3  10    6.20    8.40 
  -1  -3 -10   11.10    6.70 
  -1   3  10   24.10    9.30 
   1   3 -10   12.00    7.20 
   1  -3  10   16.10    8.10 
   1   3 -10   16.50    8.80 
  -1  -3 -10   13.80    6.60 
  -1   3  10   42.50    9.20 
  -1  -3 -10    9.10    6.80 
   1  -3  10   -2.30    7.40 
   1   3 -10   14.20    6.90 
  -1  -3 -10    3.90    6.40 
  -1   3  10   13.70    7.60 
  -1  -3  10   18.10    7.70 
   1   3  10   11.10    8.90 
   1  -3 -10   12.10    6.90 
  -1   3 -10   16.90    6.70 
   1  -3 -10   10.10    7.10 
  -1   3 -10    3.50    6.10 
   1   3  10   11.30    7.70 
  -1  -3  10   28.30    8.50 
  -1  -3  10   26.30    8.90 
  -1  -3  10    3.40    7.40 
  -1   3 -10   14.40    8.30 
   2  -3   0  914.01   86.59 
  -2   3   0  893.51   86.89 
   2  -3   0  898.31   87.99 
  -2  -3   0  904.11   87.39 
   2  -3   0  873.81   86.59 
  -2  -3   0  893.41   86.69 
  -2  -3   0  922.71   86.89 
   2   3  -1  230.18   23.80 
   2  -3   1  221.88   24.10 
   2  -3   1  237.08   23.20 
  -2  -3  -1  234.78   23.80 
  -2  -3  -1  244.18   23.00 
  -2  -3   1  236.98   25.30 
   2  -3  -1  234.28   24.30 
   2  -3  -1  208.28   26.20 
   2   3   1  232.28   23.60 
  -2  -3   1  248.28   24.30 
  -2  -3   1  256.07   24.20 
   2   3   1  220.78   23.10 
   2   3  -2  150.08   17.10 
  -2  -3  -2  155.08   16.50 
   2  -3   2  141.59   16.20 
  -2  -3  -2  138.59   15.60 
   2  -3   2  152.68   17.60 
   2   3   2  145.99   15.90 
   2  -3  -2  172.38   17.90 
  -2  -3   2  150.58   19.80 
   2   3   2  159.28   17.00 
  -2   3  -2  149.79   16.60 
   2  -3  -2  150.88   19.80 
   2  -3   3  317.67   31.00 
  -2  -3  -3  311.27   29.60 
  -2  -3  -3  291.97   29.40 
   2   3  -3  294.57   30.20 
   2   3  -3  288.97   33.20 
  -2  -3  -3  246.98   28.90 
  -2   3  -3  220.18   32.60 
  -2  -3   3  268.47   32.90 
   2  -3  -3  297.47   30.60 
   2   3   3  292.07   30.10 
  -2   3  -3  293.27   29.70 
   2  -3  -3  279.17   32.60 
   2  -3   4  834.12   78.19 
  -2  -3  -4  719.43   76.39 
   2   3  -4  764.42   79.99 
   2   3  -4  802.22   77.59 
  -2  -3  -4  802.42   76.99 
   2  -3  -4  769.62   79.79 
   2  -3  -4  808.22   77.69 
   2   3   4  777.92   77.49 
  -2   3  -4  776.52   76.99 
  -2  -3   4  811.72   80.19 
  -2   3  -4  718.03   76.49 
   2   3  -5  639.34   67.29 
   2   3  -5  690.73   71.39 
  -2  -3  -5  635.44   65.79 
  -2  -3  -5  651.03   66.79 
   2  -3   5  729.13   68.69 
   2  -3  -5  657.13   67.59 
  -2   3  -5  653.23   68.69 
   2  -3  -5  679.83   70.49 
   2   3   5  683.43   67.79 
  -2   3  -5  672.33   66.79 
  -2   3  -5  603.04   65.89 
  -2  -3   5  703.73   70.99 
   2   3  -6  152.18   19.00 
  -2  -3  -6  160.58   20.10 
  -2  -3  -6  172.28   20.50 
   2  -3   6  129.59   23.70 
  -2  -3  -6  173.38   19.60 
   2  -3   6  208.58   21.50 
  -2  -3  -6  162.48   19.40 
   2  -3   6  119.39   19.20 
  -2   3   6  142.09   19.70 
   2   3  -6  194.78   30.70 
  -2  -3  -6  168.28   18.90 
  -2   3   6  190.98   21.40 
   2   3  -6  155.78   21.30 
   2  -3  -6  176.08   21.10 
  -2   3  -6  166.18   20.00 
  -2   3  -6  160.48   20.30 
  -2   3  -6  149.69   18.40 
   2  -3  -6  140.19   18.80 
   2   3   6  180.58   21.30 
  -2  -3   6  164.28   21.50 
   2  -3  -6  173.98   20.90 
  -2  -3   6  162.38   20.60 
  -2  -3   6  151.58   23.20 
   2   3   6  185.38   21.10 
  -2  -3   6  172.08   20.40 
   2   3  -7   55.19   11.60 
  -2  -3  -7   43.30   11.20 
   2  -3   7   64.89   13.90 
  -2  -3  -7   38.00   12.10 
  -2  -3  -7   58.59   13.40 
  -2   3   7   41.80   13.10 
  -2   3   7   53.39   13.10 
  -2  -3  -7   47.60   11.30 
   2  -3   7   38.60   11.70 
  -2  -3  -7   58.49   11.00 
   2   3  -7   56.29   14.00 
  -2  -3   7   55.29   17.80 
   2   3   7   66.29   13.60 
  -2  -3   7   35.20   11.90 
  -2   3  -7   66.99   12.60 
   2   3   7   53.69   13.90 
  -2  -3   7   70.09   12.90 
   2  -3  -7   47.30   13.80 
  -2   3  -7   48.00   10.30 
   2  -3  -7   42.90   13.40 
   2  -3  -7   38.30   11.30 
   2  -3  -7   42.00   12.40 
  -2   3  -7   78.99   14.50 
  -2   3   8   60.29   14.40 
   2   3  -8   87.09   17.10 
  -2  -3  -8   55.69   13.00 
   2  -3   8   84.99   14.40 
  -2  -3  -8   60.69   13.40 
   2   3  -8   56.89   12.10 
  -2  -3  -8   64.59   12.00 
   2  -3   8   56.19   14.10 
  -2  -3  -8   64.99   13.00 
  -2   3   8   69.09   16.20 
   2   3  -8   44.00   14.30 
  -2   3  -8   78.69   12.30 
  -2  -3   8   79.29   14.70 
   2   3   8   66.29   14.40 
   2  -3  -8   63.19   13.10 
   2   3   8   63.89   15.30 
  -2   3  -8   66.79   13.10 
  -2  -3   8   37.30   20.30 
   2  -3  -8   68.69   14.20 
   2  -3  -8   60.49   13.80 
   2  -3  -8   72.89   15.70 
  -2   3  -8   62.39   14.20 
  -2  -3   8   61.09   14.80 
  -2  -3   8   46.90   13.30 
  -2   3  -8   74.29   15.70 
   2  -3   9    5.10   10.40 
  -2  -3  -9   10.50    8.20 
  -2   3   9   17.60   11.30 
  -2  -3  -9    0.10    8.00 
  -2  -3  -9    1.10    9.40 
   2   3  -9   26.90   10.90 
  -2   3   9   21.50   12.20 
   2  -3   9   -3.60   10.10 
   2   3  -9   -7.30   12.10 
  -2  -3  -9    7.80    8.30 
   2   3  -9   10.60    8.50 
  -2  -3   9    2.40   11.30 
  -2   3  -9    3.30   11.00 
  -2   3  -9    0.70    8.10 
   2   3   9   -4.40    9.40 
   2  -3  -9    1.40    8.90 
  -2  -3   9   -2.70   10.40 
   2  -3  -9    9.80    9.40 
  -2   3  -9   10.40    8.40 
   2   3   9   14.20   11.10 
   2  -3  -9    2.40    8.90 
   2  -3  -9    5.50   11.90 
  -2  -3   9    4.00    9.10 
   2   3 -10   40.70    8.60 
   2   3 -10   45.20    8.10 
   2   3 -10   45.00   10.30 
  -2  -3 -10   47.40    7.80 
  -2  -3 -10   45.80    8.80 
  -2   3  10   41.00   10.00 
   2  -3  10   16.10    8.40 
   2  -3  10   16.40    8.40 
  -2  -3 -10   16.80    6.80 
   2  -3  10   42.30    9.70 
  -2   3  10   55.99   10.00 
  -2   3  10   36.00    9.50 
   2   3  10   10.80    8.10 
  -2   3 -10   43.40    7.50 
  -2  -3  10   59.49    9.90 
  -2  -3  10   31.30    9.40 
   2  -3 -10   43.20    8.10 
  -2   3 -10   47.10    9.80 
  -2   3 -10   54.49    7.60 
  -2  -3  10   20.30    8.20 
   2  -3 -10   29.90    8.00 
   2   3  10   44.70    9.40 
  -2  -3  10   28.90    8.70 
   3  -3   0 1342.67  127.69 
   3   3   0 1267.67  128.19 
   3   3   0 1386.56  127.59 
   3  -3   0 1302.47  127.49 
  -3  -3   0 1304.17  127.69 
  -3  -3   0 1336.27  127.79 
   3  -3   0 1356.36  129.29 
  -3   3   0 1312.27  128.19 
  -3  -3   0 1342.87  128.69 
   3  -3   1  428.76   39.50 
  -3  -3  -1  424.46   41.70 
   3   3  -1  376.56   41.60 
   3   3  -1  375.16   40.00 
   3  -3   1  442.66   40.40 
  -3  -3  -1  411.56   39.90 
  -3  -3  -1  387.26   39.30 
  -3  -3   1  395.86   41.70 
   3  -3  -1  414.86   39.80 
   3   3   1  344.27   39.20 
  -3   3  -1  429.56   39.70 
   3  -3  -1  451.35   40.70 
   3   3   1  408.26   40.10 
   3  -3  -1  405.16   42.50 
  -3  -3  -2  213.28   20.80 
   3  -3   2  207.38   22.80 
  -3  -3  -2  198.38   19.80 
   3   3  -2  204.08   25.10 
   3   3  -2  214.68   22.10 
   3  -3   2  183.68   20.50 
   3   3   2  195.28   20.30 
   3  -3  -2  186.48   25.20 
   3  -3  -2  194.88   22.50 
  -3  -3   2  198.38   24.80 
   3   3   2  212.98   22.10 
  -3   3  -2  207.48   21.10 
  -3  -3  -3  298.67   31.60 
   3   3  -3  306.37   35.20 
  -3  -3  -3  320.57   31.20 
   3  -3   3  298.47   32.70 
   3   3  -3  309.17   32.30 
  -3   3  -3  300.67   31.40 
  -3  -3   3  297.27   35.40 
   3   3   3  296.77   32.30 
  -3   3  -3  287.07   31.90 
   3  -3  -3  315.47   32.70 
   3  -3  -3  304.37   35.30 
  -3  -3  -4  208.18   25.00 
   3  -3   4  211.68   27.40 
   3   3  -4  222.98   25.90 
   3   3  -4  228.78   30.70 
  -3  -3  -4  211.38   24.40 
  -3   3  -4  214.38   24.90 
   3  -3  -4  218.58   30.40 
  -3   3  -4  230.38   24.80 
   3  -3  -4  225.38   26.50 
   3   3   4  216.68   26.40 
  -3  -3   4  237.68   31.80 
   3  -3   5  115.89   18.70 
  -3  -3  -5  121.79   14.60 
   3   3  -5   70.29   14.00 
   3   3  -5  118.59   22.80 
  -3   3  -5   81.39   14.20 
   3  -3  -5  120.59   17.00 
   3  -3  -5  112.29   22.10 
  -3   3  -5   89.59   14.20 
  -3  -3   5   71.29   18.90 
   3   3   5  124.89   18.40 
  -3   3   6   64.69   26.80 
   3  -3   6  142.99   18.60 
  -3  -3  -6  137.29   16.20 
  -3  -3  -6  122.99   17.00 
  -3  -3  -6  152.58   17.40 
  -3  -3  -6  143.59   17.40 
  -3   3   6  142.39   18.90 
  -3  -3  -6  148.59   18.10 
   3  -3   6  132.89   17.70 
   3  -3   6  127.89   19.20 
  -3  -3  -6  150.48   18.30 
   3   3  -6  131.99   26.00 
   3   3  -6  131.89   19.10 
  -3   3   6  118.19   17.30 
   3   3  -6  109.39   16.10 
   3  -3   6  116.69   16.90 
   3   3   6  130.49   20.90 
  -3  -3   6  129.19   17.30 
   3   3   6  123.59   17.90 
   3  -3  -6  132.69   16.60 
  -3   3  -6  110.79   19.50 
  -3  -3   6  118.59   17.60 
  -3   3  -6  118.49   15.30 
   3  -3  -6  145.19   18.80 
  -3  -3   6  105.09   23.00 
   3  -3  -6  183.68   28.10 
  -3   3  -6  140.69   17.00 
   3  -3  -6  145.29   19.40 
  -3  -3   6  137.69   17.90 
  -3  -3   6  111.39   20.60 
  -3   3  -6  142.09   17.70 
   3   3   6  154.88   18.40 
   3   3   6  109.29   20.30 
  -3   3   7   64.89   14.30 
  -3  -3  -7   80.09   12.10 
   3   3  -7   49.99   12.20 
  -3  -3  -7   75.99   13.00 
   3   3  -7   81.19   15.80 
  -3  -3  -7   71.89   13.50 
   3  -3   7   69.49   14.10 
  -3   3   7   92.29   15.60 
   3  -3   7   77.19   13.60 
  -3  -3  -7   66.59   13.60 
  -3  -3  -7   57.59   12.20 
  -3  -3   7   79.49   14.50 
   3  -3  -7   67.59   15.50 
   3   3   7   90.09   15.40 
  -3   3  -7   70.19   12.90 
  -3  -3   7   52.89   19.10 
  -3  -3   7   66.79   13.60 
   3   3   7   96.49   15.60 
   3  -3  -7  112.49   16.90 
  -3  -3   7   72.79   14.30 
  -3   3  -7   60.79   14.00 
  -3   3  -7   57.59   11.50 
   3  -3  -7   73.59   13.30 
  -3   3  -7   77.49   14.20 
   3  -3  -7   38.90   13.60 
   3   3  -8  299.67   30.70 
   3   3  -8  302.87   32.80 
  -3  -3  -8  245.28   29.40 
  -3  -3  -8  270.17   30.60 
  -3   3   8  284.07   31.90 
  -3  -3  -8  304.87   31.20 
   3   3  -8  272.67   31.60 
  -3  -3  -8  281.47   29.30 
  -3   3   8  288.77   32.40 
   3  -3   8  327.57   32.30 
  -3  -3   8  267.67   31.40 
   3  -3  -8  233.38   30.50 
   3   3   8  262.97   31.20 
  -3   3  -8  269.77   32.10 
  -3   3  -8  271.37   29.30 
  -3  -3   8  250.27   37.70 
   3  -3  -8  291.27   33.60 
   3   3   8  282.17   32.90 
   3  -3  -8  238.18   30.30 
  -3  -3   8  297.67   31.60 
  -3   3  -8  247.18   29.90 
  -3   3  -8  240.18   30.50 
   3  -3  -8  243.58   31.20 
  -3  -3   8  229.58   30.40 
  -3  -3  -9   24.90    9.30 
   3  -3   9   -3.30    9.80 
   3   3  -9   25.10   13.20 
   3  -3   9    6.80   10.20 
  -3  -3  -9   21.40    7.90 
  -3  -3  -9    9.20    7.70 
  -3   3   9   11.30   11.20 
   3   3  -9    4.10    8.80 
  -3   3   9   36.80   11.20 
  -3  -3  -9   14.90    9.80 
   3   3  -9   -1.00   11.40 
  -3   3  -9   38.80   11.50 
   3  -3  -9   31.70   10.00 
  -3  -3   9   17.20   12.00 
  -3   3  -9    6.40    7.80 
   3  -3  -9   29.00    9.20 
   3   3   9    5.90    9.90 
  -3  -3   9   19.40    9.50 
   3  -3  -9   10.70   12.30 
   3   3   9   32.40   18.20 
   3   3   9   14.20   10.80 
  -3   3  -9   28.70    8.20 
  -3  -3   9    7.50    9.90 
   3  -3  -9   22.30    9.50 
  -3  -3 -10   12.50    6.50 
  -3  -3 -10   32.80    7.50 
  -3  -3 -10   17.20    6.80 
   3  -3  10   38.10    9.00 
   3   3 -10   27.00    7.20 
   3   3 -10   34.40    9.00 
   3   3 -10   46.30    8.80 
  -3   3  10   31.70    8.40 
   3  -3  10   27.40    8.90 
  -3   3  10   41.80    9.50 
  -3   3  10   22.30    9.10 
   3  -3  10   30.50    8.90 
   3   3  10   46.60    9.20 
   3  -3 -10   49.20    7.90 
   3   3  10   34.60    8.60 
  -3   3 -10   40.90    6.90 
  -3  -3  10   25.20    7.20 
  -3  -3  10   36.40    8.70 
  -3   3 -10   18.30    7.80 
   3  -3 -10   44.50    9.20 
  -3   3 -10   27.00    8.20 
  -3  -3  10   35.40    9.30 
  -3  -3  10   29.00    8.60 
   4   3   0 1174.88  121.09 
   4  -3   0 1341.77  120.59 
  -4  -3   0 1284.47  121.69 
   4  -3   0 1295.27  122.39 
   4  -3   0 1182.98  119.89 
  -4   3   0 1247.78  121.19 
  -4  -3   0 1234.48  120.39 
  -4   3   0 1095.29  120.39 
   4   3   0 1354.36  120.69 
   4   3   0 1299.07  120.19 
   4   3  -1 3211.38  299.27 
   4   3  -1 3159.58  300.47 
   4  -3   1 3109.19  299.47 
   4  -3   1 3005.30  298.77 
  -4   3   1 3182.88  300.37 
  -4  -3  -1 3005.30  299.07 
  -4  -3  -1 3262.77  300.37 
   4  -3   1 3197.58  300.67 
   4  -3  -1 3154.08  301.07 
  -4   3  -1 2979.70  299.27 
  -4  -3   1 3230.78  300.47 
   4  -3  -1 3338.87  299.57 
   4   3   1 3350.36  299.47 
   4  -3  -1 2863.41  298.87 
   4   3   1 2739.83  298.77 
  -4   3   2  799.82   78.49 
   4  -3   2  779.72   76.59 
   4   3  -2  823.82   76.39 
   4   3  -2  789.32   78.19 
  -4  -3  -2  794.22   76.09 
  -4  -3  -2  751.72   76.09 
   4  -3   2  705.33   75.09 
   4   3   2  803.42   76.49 
  -4   3  -2  764.52   76.39 
  -4   3  -2  808.02   75.59 
   4   3   2  725.03   74.99 
   4  -3  -2  774.62   78.79 
  -4  -3   2  794.52   78.19 
   4  -3  -2  811.32   76.59 
  -4  -3  -3  123.59   14.80 
   4   3  -3   98.19   14.60 
  -4  -3  -3   83.29   13.30 
   4  -3   3  131.39   17.00 
   4   3  -3  113.09   19.40 
   4   3   3  108.39   15.40 
   4  -3  -3  125.59   15.90 
  -4   3  -3  105.29   13.80 
  -4   3  -3  148.09   15.80 
   4  -3  -3  116.79   20.10 
  -4  -3   3  104.19   17.60 
   4   3  -4  241.48   30.30 
   4   3  -4  267.17   35.40 
  -4   3   4  308.37   38.50 
   4  -3   4  273.07   31.90 
  -4  -3  -4  274.17   29.50 
  -4  -3   4  277.37   36.10 
   4  -3  -4  280.17   36.10 
   4   3   4  279.37   31.20 
   4  -3  -4  255.57   30.70 
  -4   3  -4  272.67   30.10 
  -4   3  -4  261.37   28.70 
   4   3  -5  539.95   57.89 
  -4  -3  -5  504.85   51.29 
   4  -3   5  521.65   54.19 
  -4   3   5  531.85   60.99 
   4   3  -5  483.15   52.29 
   4  -3  -5  499.15   52.69 
  -4  -3   5  525.25   58.09 
  -4   3  -5  467.35   51.69 
   4  -3  -5  511.65   57.59 
   4   3   5  459.25   52.89 
  -4  -3  -6  333.27   31.50 
  -4  -3  -6  282.67   31.10 
  -4  -3  -6  288.67   31.30 
  -4   3   6  351.56   45.10 
  -4  -3  -6  274.97   31.10 
   4  -3   6  265.37   31.40 
  -4  -3  -6  277.87   30.60 
   4  -3   6  274.67   33.00 
   4  -3   6  337.67   32.60 
   4  -3   6  306.07   37.20 
  -4  -3  -6  294.17   32.90 
  -4   3   6  293.07   31.50 
   4  -3   6  251.07   31.70 
   4   3  -6  290.17   31.40 
   4   3  -6  353.56   42.50 
  -4  -3   6  327.27   31.60 
   4   3   6  299.07   32.10 
   4  -3  -6  312.17   41.00 
   4   3   6  290.77   32.60 
  -4  -3   6  287.17   41.70 
  -4  -3   6  309.27   32.50 
  -4   3  -6  290.07   31.20 
  -4   3  -6  233.98   31.90 
  -4   3  -6  278.57   32.10 
  -4   3  -6  276.67   30.40 
   4   3   6  245.78   33.20 
   4  -3  -6  275.97   33.40 
  -4  -3   6  286.27   32.10 
   4  -3  -6  259.97   32.50 
   4  -3  -6  263.37   31.20 
  -4   3  -6  281.97   33.00 
  -4   3  -6  351.96   32.00 
  -4  -3   6  245.88   34.30 
   4   3   6  286.07   35.60 
   4   3  -7  153.98   20.90 
   4  -3   7  164.38   22.30 
  -4  -3  -7  158.18   22.30 
   4   3  -7  171.78   23.90 
  -4   3   7  152.78   21.70 
   4  -3   7  194.78   23.90 
   4  -3   7  162.58   21.10 
  -4  -3  -7  162.98   21.00 
  -4   3   7  165.48   22.30 
  -4  -3  -7  159.58   19.70 
  -4  -3  -7  191.58   21.90 
  -4  -3  -7  166.38   21.20 
  -4   3  -7  192.58   23.60 
  -4  -3   7  171.78   21.30 
  -4  -3   7  186.08   22.30 
   4   3   7  143.39   21.50 
  -4  -3   7  176.38   26.40 
  -4  -3   7  157.48   22.50 
  -4   3  -7  172.78   22.10 
  -4   3  -7  194.68   20.70 
   4   3   7  204.88   23.40 
  -4   3  -7  159.48   20.50 
   4   3   7  136.49   23.30 
  -4   3  -7  221.08   23.30 
   4  -3  -7  168.38   23.70 
   4  -3  -7  183.58   21.60 
   4  -3  -7  149.09   22.50 
  -4   3   8   42.30   14.40 
   4  -3   8   37.90   13.30 
  -4  -3  -8   51.89   12.80 
  -4  -3  -8   67.19   12.60 
  -4  -3  -8   57.59   11.00 
   4   3  -8   75.19   12.60 
  -4  -3  -8   71.39   13.00 
  -4   3   8   57.89   14.40 
   4  -3   8   49.50   13.60 
   4   3  -8   76.59   16.10 
  -4   3  -8   54.09   13.10 
   4  -3  -8   56.99   13.00 
   4  -3  -8   71.49   15.80 
  -4  -3   8   37.70   14.00 
   4   3   8   50.29   13.40 
  -4  -3   8   64.19   14.40 
  -4   3  -8   46.20   11.20 
  -4   3  -8   52.49   10.80 
   4   3   8   74.89   14.80 
  -4   3  -8   71.69   14.30 
  -4  -3   8   51.39   13.70 
   4  -3  -8   40.70   13.60 
  -4  -3   8   43.70   12.20 
   4  -3  -8   43.30   13.40 
  -4   3   9   24.60   11.10 
   4   3  -9   54.99   13.40 
  -4  -3  -9   32.00    9.50 
   4  -3   9   34.20   11.10 
   4   3  -9   36.60   10.00 
  -4   3   9   42.20   12.20 
  -4  -3  -9   44.20   10.10 
  -4  -3  -9   44.70   10.50 
   4  -3   9   52.69   11.60 
   4   3  -9   43.10   13.60 
  -4  -3   9   44.30   13.00 
  -4   3  -9   45.50    9.30 
  -4  -3   9   36.20   10.10 
  -4   3  -9   36.60    8.90 
   4   3   9   25.40   12.40 
   4  -3  -9   26.10   13.10 
   4  -3  -9   57.79   11.00 
  -4   3  -9   51.49   11.50 
  -4  -3   9   46.00   11.40 
   4   3   9   26.30   10.50 
   4   3   9   48.10   11.70 
   4  -3  -9   39.20   10.90 
  -4  -3   9   49.40   11.90 
  -4   3  10   29.90    8.30 
   4  -3  10   24.40    8.10 
  -4  -3 -10   23.90    6.80 
   4  -3  10   19.70    8.00 
  -4   3  10   27.30    8.20 
   4   3 -10   27.60    8.50 
  -4  -3 -10   29.70    7.10 
   4   3 -10   35.10    8.30 
  -4   3  10   47.90    9.60 
  -4  -3 -10   20.50    6.70 
   4  -3  10   27.40    8.10 
   4   3 -10   37.40    7.40 
   4  -3 -10   32.20    8.60 
   4   3  10   11.80    7.20 
  -4   3 -10   34.70    6.20 
   4   3  10   20.70    7.50 
  -4  -3  10   35.80    9.20 
  -4  -3  10   32.20    8.10 
  -4  -3  10   18.80    6.60 
  -4  -3  10   32.90    7.90 
   4  -3 -10   31.20    7.50 
  -4   3 -10   26.10    7.40 
   5   3   0 1171.78  117.19 
  -5  -3   0 1228.68  119.29 
  -5   3   0 1231.18  118.69 
  -5  -3   0 1159.38  117.49 
   5  -3   0 1233.68  119.99 
   5   3   0 1283.07  117.99 
   5  -3   0 1287.67  117.89 
   5   3   0 1168.38  118.59 
  -5   3   1 1693.93  163.88 
   5   3  -1 1717.73  164.08 
   5  -3   1 1729.73  162.78 
   5  -3   1 1721.23  164.08 
   5  -3   1 1552.24  161.78 
   5   3  -1 1642.04  162.28 
  -5  -3  -1 1752.42  163.88 
  -5  -3  -1 1666.33  162.18 
   5  -3  -1 1467.85  161.78 
   5  -3  -1 1759.12  164.98 
   5   3   1 1495.15  162.08 
   5  -3  -1 1840.62  162.78 
  -5  -3   1 1748.43  163.98 
  -5   3  -1 1658.03  162.68 
   5  -3  -1 1808.02  162.38 
   5   3   1 1759.92  162.78 
   5  -3   2 1550.34  152.78 
  -5  -3  -2 1548.15  152.18 
   5   3  -2 1635.24  154.78 
  -5  -3  -2 1551.34  152.38 
  -5   3   2 1613.34  154.58 
   5  -3   2 1357.16  151.28 
   5   3  -2 1643.84  152.58 
   5  -3  -2 1562.54  155.08 
  -5   3  -2 1588.44  152.58 
   5   3   2 1615.14  152.88 
  -5  -3   2 1640.04  154.38 
  -5   3  -2 1562.74  151.68 
   5  -3  -2 1662.13  152.88 
  -5   3   3  387.86   43.60 
  -5  -3  -3  363.76   38.60 
  -5  -3  -3  337.47   37.60 
   5   3  -3  368.06   42.30 
   5  -3   3  349.37   39.40 
   5   3  -3  382.56   38.80 
   5  -3  -3  375.46   43.40 
  -5   3  -3  364.86   38.50 
  -5   3  -3  342.77   36.70 
  -5  -3   3  382.56   42.20 
   5  -3  -3  395.36   39.10 
   5   3   3  374.86   39.30 
  -5  -3  -4  107.69   14.40 
   5  -3   4   67.99   15.50 
  -5   3   4   81.49   18.60 
   5   3  -4  111.29   21.60 
   5   3  -4   74.49   13.40 
  -5   3  -4   90.79   14.60 
   5  -3  -4  136.29   24.30 
   5  -3  -4   66.99   13.60 
   5   3   4   99.39   16.30 
  -5  -3   4   95.39   18.60 
  -5  -3  -5  157.88   19.90 
  -5   3   5  136.59   28.00 
   5   3  -5  168.78   29.50 
   5  -3   5  178.18   24.40 
  -5  -3  -5  146.19   21.60 
   5  -3  -5  130.19   21.00 
  -5  -3   5  111.39   23.90 
  -5   3  -5  142.19   20.00 
   5  -3  -5  164.78   29.20 
  -5   3  -5  112.59   22.00 
   5   3   5  141.49   22.20 
  -5  -3  -6  113.09   16.10 
  -5   3   6  116.09   17.20 
   5  -3   6  107.99   17.40 
   5   3  -6  100.09   19.50 
   5   3  -6  110.39   16.20 
  -5   3   6  116.49   27.70 
   5  -3   6  148.39   20.30 
   5  -3   6  127.59   18.00 
  -5  -3  -6  112.29   17.90 
  -5  -3  -6  107.59   16.30 
   5  -3   6  114.99   16.00 
  -5  -3  -6  149.39   17.10 
   5  -3   6  175.08   25.50 
  -5  -3  -6  116.89   15.20 
  -5  -3  -6  116.49   15.80 
   5   3  -6  197.58   31.90 
   5  -3  -6  120.49   16.90 
  -5  -3   6  117.89   18.00 
  -5   3  -6  166.68   18.00 
  -5  -3   6   98.69   20.60 
   5   3   6   89.59   16.60 
   5   3   6  148.69   21.90 
  -5   3  -6  136.79   19.80 
  -5   3  -6  110.09   15.70 
  -5  -3   6  122.79   16.50 
   5  -3  -6  105.99   18.20 
  -5  -3   6  136.39   17.40 
  -5   3  -6  134.39   15.60 
   5  -3  -6  130.39   19.60 
   5  -3  -6  137.99   28.00 
  -5   3  -6  118.39   17.50 
  -5  -3   6  103.79   23.60 
   5   3   6  132.09   22.70 
  -5   3  -6  107.59   17.10 
  -5  -3   6  137.39   19.70 
  -5  -3  -7   66.29   15.10 
  -5  -3  -7   95.69   12.90 
   5  -3   7   58.89   16.20 
  -5   3   7   82.59   15.60 
   5  -3   7   86.09   14.50 
   5   3  -7   77.69   14.20 
   5  -3   7   91.09   16.40 
  -5  -3  -7   81.29   13.90 
   5   3  -7  104.19   18.70 
   5  -3   7   78.49   15.70 
  -5  -3  -7   78.59   13.80 
  -5   3   7  114.09   16.90 
  -5  -3  -7  100.19   14.80 
  -5  -3   7   60.79   13.60 
   5  -3  -7   83.79   15.30 
  -5   3  -7   97.29   15.10 
   5  -3  -7  121.39   17.90 
  -5   3  -7   67.09   15.20 
  -5   3  -7   96.39   13.00 
  -5  -3   7   71.89   20.60 
   5  -3  -7   66.19   17.10 
  -5  -3   7  102.19   14.90 
   5   3   7   86.29   15.30 
  -5   3  -7   62.39   14.90 
   5   3   7   89.99   18.90 
   5   3   7   75.19   15.40 
  -5  -3   7   70.79   15.20 
  -5   3  -7   88.29   13.50 
   5   3  -8   19.90   13.90 
  -5   3   8   25.10   12.00 
   5  -3   8   23.30   11.30 
   5   3  -8   24.40   10.70 
  -5  -3  -8   29.50   10.30 
   5  -3   8   35.80   12.60 
  -5  -3  -8   17.90   10.60 
  -5   3   8   36.60   12.30 
  -5   3   8   31.80   12.50 
  -5  -3  -8   20.00   10.80 
   5  -3   8   15.90   12.40 
  -5  -3   8   27.80   13.40 
  -5   3  -8    6.70   11.00 
  -5   3  -8   29.70    9.70 
  -5  -3   8   12.10   10.90 
  -5   3  -8   19.80    8.80 
   5  -3  -8   31.40   12.30 
  -5  -3   8   19.60   10.60 
   5  -3  -8   42.30   15.40 
   5   3   8   17.80   11.80 
   5   3   8   15.70   13.70 
   5  -3  -8    2.10   11.90 
  -5   3  -8   45.10   12.30 
   5   3   8   12.70   11.70 
   5  -3  -8   12.40   12.40 
  -5  -3   8   11.20   12.30 
  -5   3  -8   31.70   10.50 
  -5   3   9   26.40   10.20 
   5   3  -9   17.90   11.80 
   5   3  -9   37.00   12.90 
   5  -3   9   48.70   12.00 
  -5  -3  -9   39.00    9.40 
   5   3  -9   40.80    9.60 
   5  -3   9   43.60   10.80 
  -5   3   9   42.60   11.60 
  -5  -3  -9   22.00    8.40 
  -5  -3  -9   20.90    9.70 
   5   3   9   56.19   10.70 
  -5  -3   9   53.99   12.70 
   5   3   9   52.79   12.60 
  -5   3  -9   36.80   13.50 
  -5  -3   9   31.80    9.00 
  -5   3  -9   35.00   10.60 
  -5   3  -9   37.70    8.40 
  -5   3  -9   29.50    8.40 
   5  -3  -9   24.40   12.20 
   5  -3  -9   50.09   10.90 
  -5  -3   9   52.19   10.50 
   5   3   9   26.50   10.30 
   5  -3  -9   38.70   10.50 
  -5  -3   9   32.70   10.70 
   5   3 -10   24.60    6.40 
   5  -3  10   20.80    6.60 
  -5   3  10   22.50    7.00 
  -5  -3 -10   21.80    6.10 
  -5   3  10    6.40    6.90 
  -5  -3 -10   15.40    6.60 
  -5  -3 -10    6.90    5.40 
   5  -3  10   10.60    6.80 
   5   3 -10   24.10    7.80 
  -5   3  10   28.50    8.40 
   5   3 -10   14.60    7.50 
  -5   3 -10   14.60    7.00 
  -5   3 -10   21.30    6.60 
   5  -3 -10   20.50    6.70 
   5  -3 -10   25.80    8.20 
  -5  -3  10   33.50    8.50 
  -5  -3  10   13.40    7.00 
   5   3  10   20.50    7.30 
   6   3   0   46.40    8.40 
  -6  -3   0   36.00    5.90 
   6   3   0   32.70    5.40 
  -6   3   0   37.00    9.40 
   6  -3   0   62.09    9.00 
   6  -3   0   47.60   13.20 
   6   3   0   51.79   10.50 
  -6  -3   0   49.20   11.20 
  -6  -3  -1  869.01   86.19 
   6  -3   1  807.62   85.29 
  -6  -3  -1  842.22   85.59 
  -6   3   1  917.91   88.39 
   6   3  -1  891.51   85.99 
   6   3  -1  931.91   88.59 
  -6  -3  -1  920.41   88.39 
   6  -3   1  891.51   86.69 
   6  -3   1  867.91   88.29 
  -6  -3   1  915.31   88.59 
   6  -3  -1  929.61   90.09 
   6   3   1  923.91   86.79 
  -6   3  -1  847.22   86.49 
   6  -3  -1  912.11   86.49 
   6   3   1  774.62   85.99 
  -6   3  -1  882.61   86.89 
   6  -3  -1  965.40   86.29 
   6   3  -2  190.18   20.90 
   6  -3   2  187.08   22.60 
  -6  -3  -2  174.38   20.00 
   6   3  -2  187.68   25.60 
  -6   3   2  192.78   27.40 
  -6  -3  -2  173.68   21.30 
   6  -3  -2  183.08   27.20 
  -6   3  -2  166.48   18.70 
  -6  -3   2  179.98   26.40 
   6   3   2  175.78   22.30 
   6  -3  -2  191.98   22.00 
  -6   3  -2  200.48   22.10 
  -6  -3  -3   34.90    9.60 
   6  -3   3   20.60   11.60 
  -6   3   3   13.90   13.60 
   6   3  -3   47.00    9.80 
   6   3  -3   30.30   13.60 
  -6  -3  -3   32.20    8.30 
  -6  -3   3   45.50   13.70 
  -6   3  -3   43.40   10.80 
   6  -3  -3   22.40   15.10 
   6  -3  -3   42.30   10.90 
   6   3   3   39.50   11.80 
  -6  -3  -4  292.67   36.60 
   6   3  -4  333.37   36.40 
  -6   3   4  337.17   44.10 
  -6  -3  -4  321.37   36.10 
   6  -3   4  330.97   37.90 
   6   3  -4  331.77   41.60 
  -6   3  -4  350.56   36.50 
   6  -3  -4  379.96   43.40 
   6  -3  -4  340.87   36.80 
  -6  -3   4  345.57   42.40 
   6   3   4  299.67   37.60 
   6   3  -5   88.59   22.30 
  -6   3   5   52.89   19.40 
  -6  -3  -5   52.79   13.80 
   6  -3   5   43.30   12.80 
   6  -3   5   75.09   17.60 
  -6  -3  -5   14.10   13.00 
  -6  -3  -5   53.49   11.10 
   6  -3   5   69.69   15.40 
   6  -3   5   89.79   13.70 
  -6  -3  -5   83.69   14.40 
  -6  -3  -5   53.99   11.10 
  -6  -3  -5   94.69   11.80 
  -6   3  -5   55.99   11.20 
  -6  -3   5   37.80   15.40 
   6  -3  -5   50.09   11.70 
  -6   3  -5   53.39   13.50 
  -6   3  -5   72.59   12.70 
   6  -3  -5  102.79   23.70 
   6  -3  -5   85.39   15.60 
  -6  -3   5   50.89   19.20 
  -6   3  -5   66.29   11.40 
  -6  -3   5   59.69   12.60 
  -6  -3   5   62.49   11.20 
   6   3   5   51.89   15.60 
   6   3   5   64.99   11.40 
  -6  -3   5   66.59   14.70 
  -6   3  -5   70.19   10.20 
   6  -3   6   18.70   14.30 
  -6   3   6    5.10   22.50 
   6  -3   6   23.30   12.00 
   6   3  -6   23.00   13.60 
  -6  -3  -6   20.90   10.60 
  -6   3   6   17.70   10.70 
   6   3  -6   27.70   10.10 
   6   3  -6   71.89   23.40 
  -6  -3  -6   44.30   10.30 
  -6  -3  -6   18.40    9.40 
   6  -3   6   38.10   23.10 
  -6  -3  -6    5.60    9.00 
  -6  -3  -6   31.40   13.30 
   6  -3   6   10.90   10.60 
   6  -3  -6   54.69   23.20 
  -6   3  -6   34.20    8.50 
  -6  -3   6   16.40    9.20 
  -6  -3   6   31.70   19.40 
  -6  -3   6    8.00   11.60 
  -6   3  -6   35.00   10.90 
   6   3   6   35.90   15.50 
  -6  -3   6   34.60   10.70 
  -6   3  -6   20.70   11.30 
  -6  -3   6   45.20   14.50 
   6   3   6   32.60   16.30 
   6  -3  -6   36.50   11.30 
  -6   3  -6   27.00   11.00 
  -6  -3   6   27.60   15.90 
  -6   3  -6   21.90    8.60 
   6  -3  -6   59.19   14.70 
  -6   3  -6   12.10   13.10 
  -6  -3  -7  152.68   18.90 
  -6   3   7  153.58   21.20 
  -6  -3  -7  147.29   21.20 
   6  -3   7  143.89   20.20 
   6   3  -7  147.69   18.60 
  -6  -3  -7  135.09   18.40 
   6  -3   7  157.68   21.00 
   6  -3   7  110.69   20.50 
  -6   3   7  137.99   19.30 
  -6  -3  -7  158.28   19.00 
   6   3  -7  116.29   21.20 
   6  -3   7  109.79   24.00 
  -6  -3   7  118.39   18.00 
  -6   3  -7  150.88   21.70 
  -6   3  -7  163.88   19.30 
   6  -3  -7  162.88   22.30 
  -6  -3   7  136.39   19.00 
  -6   3  -7  160.98   20.30 
  -6  -3   7  131.19   24.00 
   6   3   7  144.89   22.20 
  -6  -3   7  117.69   20.90 
   6  -3  -7  139.69   19.50 
  -6   3  -7  131.99   17.80 
  -6   3  -7  132.39   16.90 
  -6   3  -7  111.59   18.60 
   6  -3  -7  112.19   20.30 
  -6   3   8   31.90   12.00 
   6   3  -8   45.70   11.20 
   6  -3   8   32.90   12.20 
   6  -3   8   49.70   13.70 
   6  -3   8   47.20   13.60 
  -6  -3  -8   54.89   11.40 
  -6   3   8   47.70   12.20 
  -6  -3  -8   52.19   11.50 
   6   3  -8   45.20   15.70 
  -6   3   8   24.60   12.80 
  -6  -3  -8   29.80   10.70 
   6  -3  -8   38.30   14.00 
  -6   3  -8   40.30    9.50 
  -6   3  -8   52.99   10.30 
  -6   3  -8   29.90   12.30 
  -6   3  -8   42.40   11.50 
  -6  -3   8   39.80   11.80 
   6  -3  -8   47.60   12.70 
   6   3   8   46.30   15.70 
   6  -3  -8   34.20   15.90 
   6   3   8   41.80   17.60 
  -6  -3   8   42.10   13.50 
   6   3   8   14.40   12.00 
  -6  -3   8   47.30   14.30 
   6  -3  -8   -9.40   16.10 
  -6  -3   8   42.70   10.80 
  -6   3  -8   30.60   10.50 
  -6  -3   8   49.10   12.60 
   6   3   8   49.40   14.30 
   6   3  -9   37.50    8.80 
  -6  -3  -9   24.40    7.60 
   6  -3   9   21.50    9.60 
   6   3  -9    9.60   11.70 
  -6  -3  -9   26.70    8.50 
  -6   3   9   34.20    9.80 
  -6   3   9   16.00    9.70 
   6   3  -9   28.60   11.90 
  -6  -3  -9   18.50    8.20 
   6   3   9   39.80   11.60 
   6   3   9   21.10    9.40 
  -6  -3   9   17.70    9.70 
  -6  -3   9   16.40    8.80 
  -6   3  -9   21.10    9.70 
  -6  -3   9   35.10    7.80 
   6  -3  -9   23.10    9.70 
   6  -3  -9   24.40   11.70 
   6  -3  -9   24.50   10.00 
  -6   3  -9   29.90    7.50 
  -6  -3   9   23.80   11.20 
  -6   3  -9   14.40    7.80 
  -6  -3 -10   -0.70    5.60 
   6   3 -10   -5.00    4.90 
   6   3 -10    4.90    6.80 
   6  -3  10   -0.20    6.20 
  -6   3  10    5.20    7.30 
  -6   3  10    1.30    5.40 
  -6  -3 -10   -4.70    4.30 
   6   3 -10   -9.50    8.70 
   6  -3 -10    5.90    6.00 
  -6  -3  10   -0.70    6.60 
   6  -3 -10   10.20    6.80 
  -6   3 -10   -4.40    5.60 
   7  -3   0  308.27   31.20 
   7   3   0  316.37   30.90 
   7  -3   0  296.27   35.60 
  -7  -3   0  282.67   30.60 
  -7  -3   0  293.67   34.20 
  -7   3   0  280.17   31.20 
   7   3   0  264.97   32.40 
  -7   3   0  304.57   33.40 
  -7  -3  -1  369.16   38.80 
   7  -3   1  384.46   42.40 
  -7   3   1  386.86   42.40 
   7   3  -1  351.06   38.10 
   7   3  -1  363.46   42.20 
  -7  -3  -1  373.86   42.70 
   7  -3   1  397.26   39.80 
  -7   3  -1  366.26   39.60 
  -7   3  -1  380.36   40.30 
  -7  -3   1  376.66   42.70 
   7   3   1  399.66   39.60 
   7  -3  -1  403.86   39.00 
   7  -3  -1  392.06   45.00 
   7   3  -2 1241.88  121.99 
   7   3  -2 1202.08  118.49 
   7  -3   2 1162.38  119.19 
  -7  -3  -2 1264.97  118.59 
  -7   3   2 1241.38  121.49 
   7  -3  -2 1248.58  122.69 
   7  -3  -2 1173.18  118.89 
  -7   3  -2 1197.88  118.59 
  -7  -3   2 1224.18  121.29 
   7   3   2 1219.38  119.39 
   7  -3   3  189.98   25.90 
   7   3  -3  196.28   24.10 
  -7   3   3  201.68   31.90 
  -7  -3  -3  224.08   24.60 
   7   3  -3  198.18   30.90 
  -7  -3   3  209.48   31.20 
   7  -3  -3  188.98   24.90 
   7  -3  -3  209.68   33.10 
   7   3   3  203.18   26.00 
  -7   3  -3  195.48   24.50 
  -7  -3  -4  146.69   18.00 
   7   3  -4  163.78   28.50 
   7  -3   4  107.69   19.60 
  -7   3   4  130.99   24.50 
   7   3  -4   88.59   16.50 
  -7   3  -4  140.49   18.70 
   7  -3  -4  152.48   27.90 
   7   3   4  114.79   20.20 
  -7  -3   4  102.69   21.60 
   7  -3  -4   88.59   16.80 
  -7  -3  -5   35.80    9.40 
   7   3  -5   59.09   21.50 
  -7   3   5   41.30   11.20 
  -7   3   5   78.89   14.00 
   7  -3   5   24.50   17.80 
  -7   3   5   44.20   21.00 
  -7  -3  -5   41.90    9.60 
   7  -3   5   25.20   11.30 
  -7  -3  -5   36.30   13.30 
  -7  -3  -5   36.60    9.40 
   7  -3   5   49.10   11.60 
   7   3  -5   51.69   10.40 
   7  -3   5   24.20   15.30 
  -7  -3  -5   44.40   13.10 
  -7  -3  -5   30.80   10.00 
   7  -3   5   37.60   13.50 
  -7   3  -5   32.60   11.50 
  -7   3  -5   30.50   13.30 
  -7  -3   5   36.70   15.10 
  -7  -3   5   48.60   11.40 
   7   3   5   29.50   10.40 
   7  -3  -5   69.89   23.60 
  -7   3  -5   44.90   10.50 
  -7   3  -5   15.30    9.50 
   7  -3  -5   51.19   13.50 
   7  -3  -5   14.70   12.80 
  -7  -3   5   45.40   13.60 
  -7  -3   5   54.39   19.00 
  -7   3  -5   54.99   10.70 
   7  -3  -5   35.40   10.80 
   7   3   5   57.49   16.60 
   7   3   5   20.30   15.10 
  -7  -3   5   12.50   16.50 
  -7   3  -5   35.90    8.50 
  -7  -3   5   36.20   12.40 
  -7   3   6   86.79   13.40 
  -7  -3  -6   58.89   11.70 
  -7  -3  -6   35.00   11.00 
   7   3  -6   45.20   11.80 
   7  -3   6   33.40   15.40 
   7  -3   6   40.30   12.70 
   7   3  -6   49.50   16.20 
  -7  -3  -6   75.79   15.80 
  -7  -3  -6   58.19   11.50 
   7  -3   6   68.39   14.20 
   7  -3  -6   44.30   12.70 
   7  -3  -6   57.09   16.10 
  -7   3  -6   40.60   12.90 
  -7  -3   6   69.79   15.70 
  -7  -3   6   52.49   11.20 
  -7   3  -6   53.19   10.10 
  -7   3  -6   50.09   11.80 
  -7   3  -6   80.19   13.70 
  -7   3  -6   46.90   10.50 
  -7  -3   6   16.70   13.00 
  -7   3  -6   55.29   16.00 
  -7  -3   6   56.59   18.20 
   7   3   6   76.19   19.20 
  -7   3   7   14.20   11.90 
  -7  -3  -7    5.30    9.50 
  -7  -3  -7  -11.60   10.30 
   7  -3   7    1.70   12.00 
   7  -3   7    2.20   14.80 
   7   3  -7   22.20   14.40 
  -7  -3  -7   10.30   13.80 
  -7   3   7   19.40   17.30 
   7   3  -7    3.60   10.10 
   7  -3   7   30.40   13.40 
  -7  -3  -7    7.90    9.60 
  -7   3  -7   -8.30   10.90 
  -7  -3   7   -3.50   12.40 
  -7   3  -7    2.20   13.10 
  -7  -3   7   15.30    9.30 
  -7   3  -7    6.60    8.90 
   7  -3  -7    2.40   12.20 
  -7  -3   7   13.60   14.50 
   7  -3  -7   25.70   15.20 
  -7  -3   7  -19.10   13.10 
  -7   3  -7    7.30    8.50 
   7  -3  -7    0.30   14.90 
   7   3   7   52.59   17.50 
  -7   3  -7   17.80   10.80 
  -7  -3   7   49.70   20.60 
  -7   3  -7    5.10    9.70 
  -7  -3  -8   90.79   14.90 
   7  -3   8  112.79   17.70 
  -7  -3  -8  126.89   15.80 
  -7   3   8   88.89   16.40 
   7  -3   8   76.69   16.00 
   7   3  -8  126.09   19.60 
  -7   3   8   88.69   16.60 
  -7  -3  -8   94.29   14.40 
   7   3  -8  129.89   15.70 
  -7   3   8   99.59   16.10 
  -7   3  -8  128.79   17.30 
  -7   3  -8   78.59   14.30 
   7  -3  -8  127.79   18.20 
  -7   3  -8  121.39   16.50 
   7  -3  -8   82.99   16.20 
  -7  -3   8  109.69   14.60 
  -7  -3   8  124.89   18.70 
   7   3   8  113.99   17.90 
  -7  -3   8   69.19   17.10 
   7   3   8   80.79   18.20 
   7  -3  -8  144.99   19.90 
  -7   3  -8  104.49   13.70 
  -7   3  -8  102.19   15.50 
  -7  -3   8  122.19   18.40 
   7  -3   9   -4.70    8.60 
   7   3  -9   21.30   11.10 
  -7  -3  -9    7.00    7.40 
  -7  -3  -9   -2.90    6.30 
   7   3  -9   30.50   10.70 
  -7  -3  -9    7.70    7.20 
  -7   3   9    0.80    9.90 
  -7   3   9    9.20    8.80 
   7   3  -9    7.60    7.20 
   7  -3   9   10.60    9.30 
  -7   3   9   15.70    8.90 
  -7  -3   9    5.90    6.70 
   7  -3  -9   14.40   10.90 
  -7  -3   9   -2.10   10.00 
  -7   3  -9    0.20    6.20 
   7  -3  -9   19.60    9.00 
   7   3   9    3.60    9.10 
  -7  -3   9    4.90    8.80 
  -7   3  -9    1.70    8.50 
   7   3   9   -4.00    9.00 
   7   3   9   13.20   10.10 
   7  -3  -9   11.90    9.10 
  -7   3  -9    1.50    6.70 
  -8   3   0  497.05   51.59 
   8  -3   0  526.75   49.99 
   8   3   0  522.15   49.80 
  -8  -3   0  566.74   53.59 
  -8   3   0  459.85   49.60 
  -8  -3   0  399.56   48.50 
   8  -3   0  515.75   54.29 
   8   3   0  453.15   51.19 
  -8   3   1  646.14   69.29 
   8   3  -1  668.63   66.39 
   8  -3   1  675.23   67.19 
   8  -3   1  645.44   69.39 
  -8  -3  -1  652.13   66.19 
   8   3  -1  618.54   69.19 
  -8  -3  -1  684.73   69.79 
  -8   3  -1  688.73   67.89 
   8  -3  -1  704.93   72.09 
   8  -3  -1  679.43   66.49 
  -8   3  -1  708.73   67.09 
  -8  -3   1  679.03   69.69 
   8   3   1  656.43   66.99 
   8  -3   2  453.55   47.40 
  -8  -3  -2  475.65   46.50 
   8   3  -2  464.35   51.49 
  -8   3   2  485.25   51.49 
   8   3  -2  431.76   45.70 
   8  -3  -2  470.05   45.90 
   8   3   2  418.26   47.40 
  -8  -3   2  453.45   50.29 
   8  -3  -2  467.15   53.79 
  -8   3  -2  457.45   46.90 
   8  -3  -2  395.16   46.50 
  -8  -3  -3   32.80   10.60 
  -8   3   3   14.30   14.60 
   8   3  -3   29.00   17.00 
   8   3  -3   26.20    9.10 
   8  -3   3   28.70   13.10 
   8  -3  -3    6.30    9.70 
  -8  -3   3   16.00   13.60 
   8  -3  -3   19.40   18.60 
  -8   3  -3   32.60   11.30 
   8   3   3   17.90   11.80 
   8  -3   4  153.58   22.20 
  -8  -3  -4  185.68   19.90 
  -8   3   4  177.68   21.00 
  -8  -3  -4  156.48   20.10 
  -8  -3  -4  176.48   20.30 
  -8   3   4  164.48   29.10 
   8  -3   4  156.88   25.30 
   8   3  -4  193.08   32.80 
  -8  -3  -4  193.48   23.60 
  -8  -3  -4  172.48   21.70 
   8  -3   4  175.88   21.40 
   8  -3   4  153.88   25.80 
   8   3  -4  199.28   25.20 
  -8   3   4  183.48   25.80 
  -8   3  -4  147.79   20.00 
  -8  -3   4  129.79   24.20 
  -8   3  -4  180.38   21.40 
   8   3   4  157.98   25.50 
   8   3   4  151.98   20.00 
  -8  -3   4  192.88   21.40 
  -8   3  -4  157.68   20.40 
   8  -3  -4  157.18   20.90 
   8  -3  -4  158.58   22.90 
  -8  -3   4  191.58   23.90 
  -8  -3   4  183.28   22.20 
  -8  -3   4  235.88   26.70 
  -8  -3   4  185.58   28.40 
  -8   3  -4  195.38   24.50 
   8  -3  -4  215.08   35.70 
   8  -3   5   85.99   15.40 
  -8  -3  -5   83.79   12.30 
   8  -3   5   69.89   19.40 
  -8  -3  -5   66.59   12.00 
   8  -3   5  103.99   15.20 
  -8   3   5  107.69   17.50 
   8   3  -5  131.79   28.80 
  -8  -3  -5   78.29   13.50 
  -8  -3  -5   62.19   12.00 
  -8   3   5  118.89   25.80 
   8  -3   5   90.89   16.30 
  -8  -3  -5   72.59   15.90 
   8   3  -5   80.69   13.20 
  -8   3   5   68.39   13.10 
   8  -3   5   62.29   20.10 
  -8  -3  -5   98.29   17.00 
  -8   3  -5   65.99   11.30 
  -8  -3   5   51.19   13.20 
   8   3   5  126.99   19.80 
   8  -3  -5   87.59   16.10 
  -8   3  -5   61.59   13.00 
   8  -3  -5   93.69   27.00 
  -8   3  -5   54.29   12.40 
  -8  -3   5   71.89   21.10 
  -8   3  -5   81.39   13.90 
   8  -3  -5   86.89   16.50 
  -8   3  -5   61.19   16.00 
  -8  -3   5   73.99   14.90 
   8  -3  -5   71.29   14.30 
   8   3   5   64.49   18.00 
  -8  -3   5   67.89   20.60 
  -8  -3   5   93.29   17.50 
  -8  -3   5   80.39   17.80 
  -8  -3  -6  213.38   24.50 
  -8  -3  -6  194.98   24.30 
  -8  -3  -6  204.98   27.10 
  -8   3   6  222.48   29.40 
  -8   3   6  209.88   25.50 
   8   3  -6  212.88   24.90 
  -8  -3  -6  210.88   25.40 
   8   3  -6  226.08   28.40 
   8  -3   6  238.28   27.30 
   8  -3   6  184.58   25.70 
   8  -3   6  221.48   27.80 
  -8   3  -6  225.68   26.10 
  -8  -3   6  193.48   24.10 
  -8   3  -6  216.58   25.00 
  -8  -3   6  214.68   25.70 
   8  -3  -6  207.88   28.00 
  -8  -3   6  220.58   29.00 
  -8  -3   6  200.88   29.20 
  -8   3  -6  209.78   28.60 
   8  -3  -6  220.38   26.10 
  -8   3  -6  211.28   25.40 
  -8   3  -6  216.88   23.90 
  -8   3  -6  183.58   25.50 
   8   3   6  230.18   29.30 
  -8  -3   6  239.48   28.30 
  -8  -3  -7  145.59   22.30 
  -8   3   7  148.89   20.40 
   8   3  -7  133.59   18.30 
  -8  -3  -7  176.48   19.20 
   8  -3   7  106.89   21.70 
  -8   3   7  127.49   21.50 
   8   3  -7  158.38   21.90 
  -8  -3  -7  122.09   18.60 
   8  -3   7  143.89   20.50 
   8  -3   7  124.19   20.10 
  -8  -3  -7  118.09   17.70 
  -8   3  -7  132.99   18.50 
   8  -3  -7  136.19   22.10 
   8   3   7  152.38   21.20 
  -8  -3   7  122.39   22.10 
  -8   3  -7  150.38   17.00 
  -8  -3   7  123.49   19.60 
  -8   3  -7  171.08   23.60 
  -8   3  -7  152.08   19.80 
  -8  -3   7  114.39   17.10 
  -8  -3   7  134.09   21.90 
   8   3   7  158.28   23.40 
  -8   3  -7  141.19   18.90 
   8  -3  -7  134.29   22.20 
   8  -3  -7  128.39   19.50 
   8   3  -8   -4.60   12.80 
  -8   3   8   -0.40   11.90 
  -8  -3  -8    9.90    8.80 
   8  -3   8   18.30   12.60 
  -8  -3  -8    9.40    8.40 
   8  -3   8    1.50   10.00 
   8  -3   8   52.09   14.60 
  -8   3   8    2.60   10.30 
  -8  -3  -8   14.50    9.40 
   8   3  -8    4.40    8.80 
   8   3   8    0.30   14.30 
  -8   3  -8   15.00    8.60 
   8   3   8   -3.20   12.50 
  -8  -3   8   -4.20    7.20 
  -8  -3   8   -0.50   12.60 
  -8   3  -8   12.60    9.20 
   8  -3  -8   -3.40   12.70 
  -8  -3   8   12.70   12.80 
   8  -3  -8   31.10   13.80 
   8  -3  -8   16.80   10.90 
  -8   3  -8   20.60    9.80 
  -8   3  -8    7.70    7.70 
   8   3  -9   -0.10   10.40 
   8  -3   9    7.20    7.80 
  -8  -3  -9   10.20    7.00 
  -8  -3  -9   -1.70    6.00 
  -8   3   9   17.60    7.80 
  -8   3   9   12.50    9.30 
   8   3  -9    7.10    6.70 
  -8   3   9   27.00    8.70 
   8  -3   9    6.60    8.30 
   8   3  -9   -1.40    9.40 
  -8  -3  -9   10.60    6.70 
   8   3   9    3.50    8.80 
   8  -3  -9    7.90    8.30 
   8   3   9   10.80    9.30 
   8  -3  -9    9.90    8.60 
   8  -3  -9    4.50    9.30 
  -8  -3   9    3.00    8.40 
  -8   3  -9   10.70    7.50 
  -8  -3   9    7.60    9.70 
  -8   3  -9    4.90    6.50 
  -9   3   0    6.80   10.30 
  -9  -3   0    3.20   11.20 
  -9   3   0   -4.60    8.70 
   9  -3   0    7.90    9.60 
   9   3   0    7.50    9.10 
   9  -3   0    4.50   15.70 
  -9  -3  -1  285.57   36.90 
   9   3  -1  276.97   35.20 
   9   3  -1  273.47   30.80 
  -9  -3  -1  262.17   30.70 
  -9   3   1  284.77   35.40 
   9  -3   1  259.17   35.20 
   9  -3   1  278.27   32.10 
   9   3   1  280.67   31.50 
  -9  -3   1  294.07   35.90 
   9  -3  -1  280.57   39.30 
  -9   3  -1  288.27   31.50 
  -9   3  -1  268.77   36.00 
   9  -3  -1  315.07   31.20 
  -9  -3  -2    3.30    9.70 
   9   3  -2   18.40   15.40 
  -9   3   2    5.30   13.10 
   9  -3   2   -6.40   10.70 
   9   3  -2    3.10    8.70 
  -9   3  -2    0.70   10.30 
   9   3   2   12.00   11.10 
  -9  -3   2    2.60   11.80 
   9  -3  -2    4.90    9.10 
   9  -3  -2    5.80   18.50 
  -9   3   3  296.57   40.50 
  -9  -3  -3  265.77   32.40 
  -9   3   3  277.97   34.20 
  -9  -3  -3  306.27   35.10 
   9  -3   3  242.78   31.30 
   9  -3   3  250.27   35.90 
   9   3  -3  330.37   41.70 
   9  -3   3  298.97   35.60 
  -9   3   3  308.07   36.70 
  -9  -3  -3  347.77   34.10 
  -9  -3   3  271.27   32.20 
  -9  -3   3  306.87   39.30 
  -9  -3   3  236.58   38.80 
  -9   3  -3  333.67   34.30 
   9  -3  -3  262.37   35.90 
   9  -3  -3  295.77   32.30 
   9   3   3  274.07   35.00 
  -9   3  -3  291.07   32.90 
  -9  -3   3  295.57   34.40 
   9  -3  -3  323.27   42.70 
   9  -3   4    6.10   17.50 
  -9  -3  -4   16.20    9.20 
   9  -3   4   15.40   13.40 
  -9   3   4   12.90   14.80 
  -9  -3  -4   27.30    8.90 
  -9   3   4    1.30    9.10 
   9   3  -4   47.90   19.80 
  -9  -3  -4   10.30    9.10 
  -9   3   4   14.30   16.50 
   9  -3   4    2.50   14.50 
  -9  -3  -4   10.70    8.20 
  -9  -3  -4   18.10   11.20 
  -9  -3  -4    4.10   12.00 
  -9  -3  -4   15.90    8.50 
  -9  -3  -4   -6.40   15.40 
   9  -3   4   -0.30   10.60 
  -9   3  -4   10.80    9.30 
  -9  -3   4   20.40   13.50 
  -9   3  -4    7.00    8.60 
   9  -3  -4   28.30   22.80 
  -9  -3   4   14.60   12.10 
   9   3   4   -2.80   14.30 
  -9  -3   4   -0.60   12.20 
  -9  -3   4    3.00   15.30 
  -9  -3   4    3.30   15.80 
  -9  -3   4   13.90    8.70 
   9   3   4   13.50   14.00 
  -9   3  -4   12.10    9.20 
  -9   3  -4   32.00   14.00 
   9   3   4   17.10   10.50 
  -9   3  -4   -6.70    7.00 
   9   3   4    4.40    9.40 
   9  -3  -4    6.30   10.50 
   9  -3  -4   11.00   13.50 
  -9  -3  -5  162.38   22.30 
  -9  -3  -5  148.49   19.50 
   9  -3   5  156.88   21.00 
  -9  -3  -5  161.78   19.30 
  -9   3   5  126.39   22.00 
   9   3  -5  150.78   19.60 
   9  -3   5  175.28   26.30 
  -9   3   5  141.09   19.70 
   9  -3   5  154.18   22.70 
  -9  -3  -5  168.08   19.30 
   9  -3   5  192.48   21.30 
  -9  -3  -5  120.89   18.30 
  -9   3  -5  148.19   19.40 
   9  -3  -5  147.19   22.60 
  -9  -3   5  167.08   21.20 
  -9  -3   5  163.58   19.80 
  -9   3  -5  147.19   17.80 
  -9  -3   5  163.88   24.00 
  -9   3  -5  191.88   24.50 
  -9  -3   5  121.29   23.30 
   9  -3  -5  124.89   19.90 
  -9   3  -5  146.19   20.10 
   9  -3  -5  176.28   23.40 
   9   3   5  135.69   20.10 
   9   3   5  184.68   25.30 
  -9  -3   5  143.29   22.10 
  -9   3  -5  159.38   19.70 
  -9  -3   5  163.88   26.70 
   9   3  -6   25.70   15.90 
  -9   3   6   25.10   12.00 
   9  -3   6    8.50   13.10 
   9  -3   6   -6.80   11.70 
   9  -3   6  -12.40   17.70 
  -9   3   6   14.70   14.50 
  -9  -3  -6   40.20   14.80 
   9   3  -6   17.90   10.50 
  -9  -3  -6    5.80    9.60 
  -9  -3  -6   33.00   10.50 
  -9  -3  -6   16.10   10.60 
  -9  -3   6    0.80   14.50 
  -9   3  -6   12.30   14.50 
   9   3   6   34.90   18.20 
  -9  -3   6    5.90   14.50 
  -9   3  -6   13.20    8.40 
  -9   3  -6   36.60   10.70 
   9   3   6   -0.10   13.00 
  -9  -3   6   37.00   12.60 
   9  -3  -6   52.79   16.80 
   9  -3  -6   19.30   17.60 
  -9   3  -6    6.20   10.40 
   9  -3  -6    6.40   12.50 
  -9  -3   6    4.40    8.00 
  -9   3  -6   10.60   10.70 
  -9  -3   6   23.00   17.60 
   9   3  -7   36.30   15.10 
  -9   3   7   14.20   14.80 
  -9  -3  -7   32.20   10.10 
   9  -3   7   16.30   11.70 
   9   3  -7   30.30   10.80 
   9  -3   7   45.60   14.20 
   9  -3   7   31.40   16.50 
  -9  -3  -7   47.20   14.40 
  -9  -3  -7   40.20   11.40 
  -9  -3  -7   33.50   11.20 
  -9   3   7   33.20   12.40 
  -9   3  -7   48.30   12.70 
   9   3   7   52.69   17.90 
   9   3   7   52.79   14.80 
  -9   3  -7   40.50   16.00 
   9  -3  -7   28.70   15.40 
   9  -3  -7   40.90   13.70 
  -9  -3   7   35.20   16.10 
   9  -3  -7   18.00   14.60 
  -9  -3   7   23.20    8.80 
  -9  -3   7   24.70   13.00 
  -9  -3   7   27.60   15.90 
  -9   3  -7   44.40   11.60 
  -9   3  -7   26.40    9.10 
  -9   3  -7   15.90   10.70 
   9  -3   8   56.59   14.30 
  -9  -3  -8   36.10    9.40 
   9   3  -8   40.90    9.90 
   9  -3   8   27.30   11.60 
  -9   3   8   47.40   14.30 
   9  -3   8   46.90   12.80 
  -9   3   8   43.60   11.20 
  -9  -3  -8   42.10    9.70 
  -9  -3  -8   50.39   11.00 
   9   3  -8   39.50   15.20 
  -9   3  -8   44.30   10.40 
  -9  -3   8   44.50   12.90 
  -9   3  -8   56.99   11.50 
   9  -3  -8   69.39   12.60 
  -9  -3   8   47.20   14.50 
   9   3   8   52.69   14.60 
   9  -3  -8   32.10   12.70 
   9   3   8   54.89   13.30 
  -9   3  -8   40.20    9.70 
   9  -3  -8   40.50   14.20 
   9  -3   9   15.30    7.70 
   9   3  -9   12.80    8.80 
  -9  -3  -9   11.20    6.50 
   9  -3   9   23.10    8.60 
  -9   3   9   39.60    9.10 
   9   3  -9   20.20    6.50 
  -9   3   9   17.70    8.20 
  -9   3   9   24.50    7.10 
   9   3  -9   14.80    9.90 
  -9  -3  -9   10.60    5.90 
  -9  -3  -9   15.60    6.20 
  -9  -3   9   26.00    9.00 
   9  -3  -9   21.90    7.60 
  -9  -3   9   24.30    9.00 
  -9   3  -9   10.70    6.00 
   9   3   9   32.00    8.70 
   9  -3  -9   18.30    8.90 
   9  -3  -9   12.00    7.80 
   9   3   9   29.70    9.10 
  -9   3  -9   23.80    7.20 
  10  -3   0   28.50   11.20 
  10   3   0   18.20   10.30 
 -10   3   0    0.80   10.50 
 -10  -3   0    4.30   13.30 
  10  -3   0   -4.40   16.10 
  10   3  -1  386.06   42.30 
  10   3  -1  393.36   47.60 
 -10   3   1  386.26   46.30 
 -10  -3  -1  386.76   41.90 
 -10  -3  -1  350.16   47.30 
  10  -3   1  417.26   43.70 
 -10  -3   1  464.15   47.90 
  10   3   1  401.86   43.30 
  10  -3  -1  422.66   42.70 
 -10   3  -1  433.76   43.20 
  10  -3  -1  364.96   49.90 
  10  -3   2  431.26   54.79 
  10  -3   2  517.15   54.59 
  10   3  -2  556.04   58.79 
 -10  -3  -2  491.95   56.49 
 -10  -3  -2  504.45   51.79 
 -10  -3  -2  502.65   52.09 
  10   3  -2  517.05   52.89 
  10  -3   2  479.35   51.79 
 -10   3   2  504.25   57.99 
 -10  -3  -2  525.95   53.09 
 -10   3   2  499.85   51.29 
 -10   3  -2  510.25   51.69 
 -10  -3   2  511.05   51.99 
 -10   3  -2  562.04   51.69 
  10  -3  -2  520.55   61.29 
  10   3   2  477.65   54.39 
  10  -3  -2  532.35   52.79 
 -10  -3   2  522.25   53.69 
 -10   3  -2  526.75   53.69 
 -10  -3   2  501.35   57.79 
 -10  -3   2  514.25   58.29 
  10  -3   3   82.79   20.00 
  10   3  -3  135.99   27.00 
 -10  -3  -3   96.89   14.90 
  10  -3   3   96.29   15.10 
 -10  -3  -3   99.59   14.90 
 -10  -3  -3  119.09   17.50 
 -10   3   3  114.79   22.60 
 -10  -3  -3  127.59   19.10 
 -10  -3  -3   95.59   15.20 
 -10  -3  -3   79.49   20.30 
 -10  -3  -3  122.49   14.90 
 -10   3   3   89.49   20.50 
  10  -3   3  103.69   17.80 
 -10   3   3   97.89   14.90 
  10  -3   3  124.59   22.20 
 -10   3   3  113.79   17.10 
 -10  -3   3  129.69   18.50 
  10  -3  -3  114.89   17.50 
  10  -3  -3  119.49   29.60 
 -10   3  -3   95.29   18.30 
 -10   3  -3  117.29   15.50 
  10  -3  -3  124.79   19.30 
 -10   3  -3  102.09   15.00 
  10   3   3  125.09   16.30 
  10  -3  -3  141.09   16.90 
 -10  -3   3  135.19   24.00 
 -10  -3   3  132.29   17.50 
 -10   3  -3  122.19   15.60 
  10   3   3  107.19   19.50 
  10   3   3  106.39   19.80 
 -10   3  -3   68.89   25.60 
  10   3   3   92.69   15.20 
 -10  -3   3  125.99   16.10 
 -10  -3   3  116.39   20.20 
 -10  -3   3  108.09   18.90 
 -10  -3  -4   80.89   13.60 
 -10  -3  -4   76.39   20.90 
  10   3  -4  119.89   27.40 
  10  -3   4   80.89   21.20 
 -10   3   4   67.39   14.20 
 -10   3   4  103.39   20.90 
  10  -3   4   80.19   16.30 
 -10  -3  -4   87.69   13.60 
 -10  -3  -4   64.99   12.30 
 -10  -3  -4  120.79   16.60 
  10  -3   4   68.89   20.00 
 -10   3   4   51.49   20.40 
  10  -3   4   94.09   15.20 
 -10  -3  -4   64.49   12.70 
 -10  -3  -4  107.79   16.50 
 -10   3  -4   95.59   18.30 
  10   3   4  110.19   18.90 
  10  -3  -4  112.49   30.60 
  10  -3  -4   70.89   17.60 
 -10   3  -4   74.59   13.50 
 -10  -3   4   77.29   14.30 
  10  -3  -4   65.09   14.40 
 -10  -3   4   41.40   17.70 
 -10  -3   4   76.09   21.90 
 -10  -3   4   93.29   16.70 
 -10  -3   4  123.29   21.60 
 -10   3  -4   70.69   13.20 
 -10  -3   4   63.19   16.00 
  10   3   4   96.29   15.10 
  10   3   4   62.39   19.70 
 -10   3  -4   75.09   13.50 
  10  -3   5  362.96   41.00 
 -10  -3  -5  367.46   38.50 
 -10   3   5  354.36   41.10 
 -10  -3  -5  387.16   37.50 
 -10  -3  -5  344.17   40.60 
 -10   3   5  382.86   38.70 
  10   3  -5  319.17   38.30 
  10  -3   5  358.66   38.90 
 -10  -3  -5  371.96   37.80 
  10  -3   5  385.66   44.10 
 -10  -3   5  334.17   44.70 
 -10  -3   5  337.37   41.80 
  10  -3  -5  328.77   40.20 
  10   3   5  334.87   38.70 
 -10  -3   5  351.76   39.00 
 -10   3  -5  348.17   38.30 
  10  -3  -5  333.57   38.90 
 -10   3  -5  394.36   38.20 
  10   3   5  414.46   42.10 
 -10   3  -5  358.26   41.90 
 -10   3  -5  349.96   38.20 
 -10  -3   5  364.36   38.60 
  10  -3  -5  311.97   39.90 
 -10  -3   5  312.67   41.00 
 -10  -3   5  311.27   40.10 
  10  -3   6  140.29   21.60 
 -10   3   6  107.39   20.00 
 -10  -3  -6  127.49   20.40 
  10  -3   6   74.69   17.00 
 -10  -3  -6   98.79   15.20 
 -10  -3  -6  109.09   16.40 
 -10  -3  -6  111.49   15.30 
 -10   3   6   82.39   16.20 
  10  -3   6  111.39   17.80 
  10  -3   6   90.79   23.20 
  10   3  -6   75.49   20.10 
  10   3  -6   60.89   14.40 
 -10   3  -6   71.89   15.30 
 -10  -3   6   72.09   21.00 
  10   3   6   94.59   17.80 
 -10  -3   6   66.59   12.70 
 -10  -3   6   80.89   16.10 
  10  -3  -6   92.09   17.20 
  10  -3  -6   76.79   16.90 
 -10  -3   6   90.59   19.60 
 -10  -3   6   85.39   19.80 
  10   3   6  130.69   22.20 
  10  -3  -6  101.69   19.90 
 -10   3  -6  117.29   20.80 
 -10   3  -6  102.39   15.90 
 -10   3  -6   99.19   15.30 
 -10   3   7   61.79   13.50 
  10  -3   7   58.59   14.20 
 -10  -3  -7   74.39   13.30 
  10  -3   7   51.89   16.40 
  10  -3   7   76.19   15.50 
  10   3  -7   46.60   15.70 
  10   3  -7   77.19   12.20 
 -10  -3  -7   55.69   11.10 
 -10   3   7   51.49   16.80 
 -10  -3  -7   64.89   15.60 
 -10  -3  -7   68.69   12.30 
 -10  -3   7   66.09   14.20 
 -10   3  -7   56.89   12.60 
  10   3   7   74.49   17.80 
 -10  -3   7   36.70   16.10 
  10  -3  -7   80.79   14.60 
 -10   3  -7   48.30   12.50 
  10   3   7   52.89   15.00 
 -10  -3   7   62.59   17.20 
  10  -3  -7   34.90   15.90 
 -10   3  -7   53.39   16.00 
  10  -3  -7   44.90   15.70 
 -10   3  -7   56.49   12.40 
  10   3   7   30.00   21.60 
  10  -3   8   34.30   10.60 
 -10  -3  -8   29.50    8.30 
  10  -3   8   39.00   12.50 
 -10  -3  -8   28.40    8.20 
  10   3  -8    4.20   16.00 
  10  -3   8   22.40   10.60 
 -10  -3  -8   18.40    8.80 
 -10   3   8   37.90   13.10 
  10   3  -8   22.00    8.10 
 -10   3   8   21.40    8.90 
 -10   3   8   24.50    9.20 
  10   3  -8   32.80   13.30 
  10  -3  -8   29.20   10.40 
  10  -3  -8    9.10   10.80 
 -10  -3   8   37.10   13.00 
  10   3   8   35.50   11.60 
 -10  -3   8   32.40   10.40 
 -10   3  -8   14.60    7.60 
 -10   3  -8   27.70    9.60 
 -10   3  -8   27.00    8.70 
  10   3   8   44.80   13.40 
  10  -3  -8   25.20   12.40 
 -10  -3  -9   55.59    8.70 
 -10   3   9   49.40   10.20 
  10  -3   9   71.79   14.30 
 -10   3   9   56.19   10.90 
 -10  -3  -9   51.79    7.70 
  10   3  -9   31.60    9.90 
  10   3  -9   37.70    7.60 
  10   3  -9   39.40    9.40 
 -10  -3  -9   53.59    8.70 
  10  -3   9   30.40    8.00 
  10   3   9   61.89   13.00 
  10   3   9   74.99   11.90 
  10  -3  -9   49.10   11.40 
  10  -3  -9   59.89    8.60 
 -10  -3   9   63.39   10.80 
 -10   3  -9   35.90    7.60 
 -10  -3   9   53.89   10.40 
  10  -3  -9   36.20    9.10 
 -10   3  -9   54.99    8.40 
 -11   3   0   53.09   11.40 
  11  -3   0   69.89   14.70 
 -11  -3   0   51.19   17.60 
  11   3   0   55.89   13.80 
 -11   3   0   59.89   14.60 
 -11  -3   0   67.99   12.70 
 -11  -3   0   57.89   13.20 
 -11  -3   0   33.90   15.10 
  11  -3   0   52.19   10.70 
 -11  -3   0   39.70   11.10 
 -11   3   0   62.19   12.00 
 -11   3   0   56.99   11.30 
 -11  -3   0   58.89   17.20 
 -11   3   0   68.29   24.30 
 -11   3   1   44.20   18.40 
 -11   3   1   12.10   17.30 
 -11  -3  -1   18.90   17.10 
  11  -3   1   72.39   15.50 
 -11  -3  -1   34.60   11.90 
 -11   3   1   63.79   12.30 
 -11  -3  -1   42.40    9.70 
 -11  -3  -1   63.39   12.00 
 -11   3   1   46.80   15.30 
 -11  -3  -1   68.49   12.70 
  11  -3   1   56.69   11.70 
 -11  -3  -1   54.99   11.30 
 -11   3   1   71.09   12.00 
  11   3  -1   63.99   13.90 
  11  -3   1   25.70   17.20 
 -11  -3  -1   50.39   17.20 
 -11   3   1   48.80   11.40 
 -11  -3  -1   71.49   15.30 
 -11   3  -1   71.99   22.60 
  11  -3  -1   81.49   14.30 
 -11   3  -1   64.89   13.80 
  11  -3  -1   52.99   11.60 
 -11   3  -1   74.59   11.80 
  11  -3  -1   19.80   22.20 
  11  -3  -1   26.50   14.50 
 -11  -3   1   47.60   15.40 
 -11   3  -1   38.90   10.90 
 -11   3  -1   63.69   12.00 
 -11  -3   1   79.59   13.50 
 -11  -3   1   24.10   17.90 
 -11  -3   1   56.59   16.80 
 -11  -3   1   87.59   15.10 
 -11   3  -1   41.90   11.40 
 -11  -3   1   52.49   11.70 
  11   3   1   49.10   13.60 
 -11  -3   1   49.99   12.60 
 -11  -3  -2   32.50   10.10 
 -11  -3  -2   18.10    8.20 
 -11  -3  -2   14.90    9.80 
 -11  -3  -2   32.00   13.70 
 -11  -3  -2   31.30    9.90 
 -11   3   2   24.30    9.30 
  11   3  -2   61.49   20.70 
  11  -3   2   27.20   16.50 
 -11  -3  -2    1.90   10.30 
  11  -3   2   17.50   10.50 
 -11  -3  -2   22.60   15.30 
  11  -3   2   52.19   15.30 
 -11   3   2   12.10   10.80 
 -11   3   2   23.10   17.80 
  11   3  -2   29.60   11.80 
 -11  -3  -2   23.40   12.50 
 -11   3   2   22.00   15.20 
 -11  -3   2   21.10   11.20 
 -11   3  -2   37.80    9.70 
 -11  -3   2   24.50    9.50 
 -11   3  -2    5.60    9.10 
  11  -3  -2   19.00   22.40 
 -11   3  -2    9.20   13.00 
 -11  -3   2   24.80   15.80 
  11   3   2   23.20   13.90 
  11  -3  -2   24.10   10.50 
  11  -3  -2   25.20   11.70 
 -11   3  -2   36.40   22.70 
 -11  -3   2   19.30   15.50 
  11  -3  -2    4.60   12.70 
 -11   3  -2   20.50   14.50 
 -11  -3   2   10.80   11.80 
 -11   3  -2   12.20    9.50 
  11   3   2   39.70   10.80 
 -11  -3   2   34.50   13.60 
 -11  -3  -3  543.25   50.89 
 -11  -3  -3  475.65   49.30 
 -11  -3  -3  509.65   49.00 
 -11  -3  -3  462.85   48.50 
  11  -3   3  474.05   49.60 
  11  -3   3  498.95   53.29 
 -11  -3  -3  468.85   48.90 
 -11  -3  -3  464.45   54.89 
  11   3  -3  564.74   60.29 
 -11   3   3  474.85   53.59 
 -11   3   3  474.85   49.80 
 -11   3   3  443.06   56.49 
  11  -3   3  409.16   52.49 
  11  -3   3  427.76   48.60 
 -11  -3  -3  479.65   48.10 
  11   3  -3  485.05   50.59 
 -11   3   3  499.45   48.90 
  11  -3  -3  458.65   49.99 
  11   3   3  419.36   52.49 
 -11   3  -3  501.95   48.70 
  11   3   3  428.96   50.19 
  11  -3  -3  499.85   49.00 
 -11  -3   3  473.05   48.80 
 -11   3  -3  522.05   51.49 
 -11   3  -3  499.25   48.70 
 -11  -3   3  511.15   53.29 
 -11   3  -3  404.16   57.79 
 -11  -3   3  470.85   50.89 
  11   3   3  436.66   48.50 
  11  -3  -3  411.36   50.99 
  11  -3  -3  451.95   60.09 
 -11  -3   3  480.65   50.39 
 -11  -3   3  497.15   49.60 
 -11  -3   3  440.96   55.89 
 -11   3  -3  489.45   48.80 
 -11  -3  -4  120.39   16.30 
 -11  -3  -4  112.39   19.80 
  11  -3   4   76.79   17.70 
  11  -3   4  111.89   24.50 
 -11  -3  -4   86.99   15.50 
 -11  -3  -4  105.29   24.30 
  11  -3   4  112.49   17.40 
 -11   3   4   99.39   23.90 
 -11  -3  -4  105.79   18.10 
 -11  -3  -4   88.69   15.30 
 -11   3   4   90.59   16.20 
 -11  -3  -4   91.29   15.00 
  11   3   4   90.49   16.80 
  11  -3  -4   92.19   19.70 
 -11  -3   4   84.49   19.40 
 -11   3  -4  107.99   16.10 
 -11  -3   4  127.19   19.40 
 -11  -3   4  116.49   23.90 
 -11  -3   4  120.79   16.80 
  11  -3  -4   93.49   16.30 
 -11   3  -4   92.99   15.80 
 -11  -3   4  102.29   21.00 
 -11   3  -4   85.39   15.70 
 -11   3  -4  105.99   19.70 
  11   3   4  149.19   20.50 
  11  -3   5  102.79   19.10 
 -11   3   5   80.39   14.80 
 -11   3   5   38.20   18.20 
 -11  -3  -5   67.39   12.50 
 -11  -3  -5   53.99   12.80 
 -11  -3  -5   69.99   18.20 
 -11  -3  -5  106.39   17.80 
  11  -3   5  103.99   23.00 
  11   3  -5   79.69   14.50 
 -11  -3  -5   71.79   14.30 
  11  -3   5   76.29   15.70 
  11   3   5   79.89   18.10 
  11  -3  -5   47.90   15.00 
 -11  -3   5   64.39   18.10 
 -11   3  -5   80.19   19.40 
  11  -3  -5   76.39   18.30 
  11   3   5   57.49   15.70 
 -11  -3   5   74.49   15.20 
 -11  -3   5   73.19   21.70 
 -11   3  -5   59.39   13.60 
 -11   3  -5   57.39   13.20 
  11  -3  -5   49.30   16.50 
 -11   3  -5   43.70   13.30 
 -11  -3   5   79.09   18.30 
 -11  -3   5   72.89   20.90 
  11  -3   6   -7.70   13.00 
 -11   3   6    0.70   14.70 
 -11  -3  -6    6.60    9.40 
  11  -3   6   -6.40   19.00 
 -11  -3  -6   -6.10   10.70 
  11  -3   6   -2.10   14.60 
 -11  -3  -6   11.90   13.90 
 -11  -3  -6   21.40   10.70 
  11   3  -6   21.80   10.10 
  11   3  -6  -25.00   15.50 
 -11   3   6   -7.00   11.10 
  11  -3  -6   27.50   13.20 
  11  -3  -6   13.10   12.60 
 -11   3  -6   -4.10   10.20 
 -11  -3   6    9.10   17.40 
 -11  -3   6   10.50   10.90 
 -11   3  -6   -3.70   10.80 
 -11  -3   6   26.80   16.40 
 -11   3  -6   -2.40   15.10 
  11   3   6   -3.20   13.40 
  11   3   6    1.10   16.90 
 -11   3  -6    7.30    9.70 
  11  -3  -6  -14.80   15.40 
 -11  -3   6  -18.40   15.00 
  11   3   6  -12.60   20.80 
 -11  -3  -7   14.70    8.50 
  11  -3   7   26.90   12.80 
 -11  -3  -7   24.40    9.70 
  11   3  -7   11.40   13.30 
  11  -3   7   14.10   14.40 
 -11   3   7   37.30   10.00 
 -11   3   7   10.60   10.00 
 -11   3   7   15.70   13.30 
 -11   3   7   27.70   14.00 
 -11  -3  -7    2.50    9.70 
  11   3  -7   26.00    8.70 
  11  -3   7    4.70   10.00 
 -11   3  -7   19.80   10.00 
  11  -3  -7   25.40   12.60 
  11  -3  -7   22.00   13.40 
 -11  -3   7   16.00   14.10 
 -11   3  -7   17.00    9.80 
 -11  -3   7   24.50   10.70 
  11   3   7    2.40   17.60 
  11   3   7   13.90   14.40 
  11   3   7   24.70   13.10 
  11  -3  -7    1.10   11.00 
 -11  -3   7   34.00   14.70 
 -11   3  -7   13.80    8.70 
  11   3  -8    6.10    6.60 
  11  -3   8   -2.00    8.30 
  11  -3   8  -16.10    8.60 
 -11   3   8    1.60    7.30 
  11  -3   8   -0.50   10.10 
 -11  -3  -8    1.00    6.60 
  11   3  -8   10.00   10.70 
 -11   3   8   -6.00    6.50 
 -11   3   8   13.30   10.20 
 -11  -3  -8   -3.90    5.90 
  11   3  -8   10.50   11.60 
 -11  -3  -8    9.10    7.70 
  11   3   8    0.80   10.30 
 -11   3  -8    6.70    7.60 
  11   3   8    3.50    9.40 
  11  -3  -8   -0.50    8.30 
 -11  -3   8   14.90   17.80 
 -11  -3   8   -7.40   10.60 
 -11   3  -8   -1.80    7.10 
 -11   3  -8  -13.90    7.50 
  11  -3  -8  -13.10   10.00 
 -11  -3   8    7.40    8.30 
  11  -3  -8   -8.50    9.30 
  12  -3   0   52.29   14.30 
 -12   3   0   42.70   10.90 
 -12  -3   0   26.80   18.00 
 -12  -3   0   19.10    8.50 
 -12  -3   0   20.50   15.90 
 -12   3   0   20.30   11.20 
 -12  -3   0   22.40   10.80 
  12  -3   0   27.30   10.80 
 -12  -3   0   36.80   12.00 
 -12   3   0   31.60   11.50 
 -12  -3   0   16.30   14.70 
 -12   3   0   31.40   11.50 
 -12  -3   0   22.70   12.60 
  12   3   0   49.70   14.00 
  12  -3   0   21.30   15.70 
 -12   3   0   31.80   11.40 
  12  -3   0   41.80   15.20 
  12  -3   1  324.07   36.20 
 -12  -3  -1  286.37   31.00 
 -12  -3  -1  292.07   33.10 
 -12   3   1  310.77   33.50 
 -12  -3  -1  319.77   40.60 
  12  -3   1  294.57   37.10 
 -12   3   1  333.77   33.60 
 -12   3   1  312.67   32.80 
 -12   3   1  330.47   37.50 
 -12   3   1  307.47   32.10 
  12   3  -1  316.47   35.00 
 -12  -3  -1  326.97   33.20 
 -12  -3  -1  317.07   34.10 
 -12  -3  -1  242.18   38.50 
 -12  -3  -1  305.57   36.20 
 -12  -3  -1  237.68   33.20 
  12  -3   1  273.57   32.60 
 -12   3   1  196.28   42.90 
  12   3   1  249.18   32.10 
 -12  -3   1  300.57   34.40 
 -12  -3   1  303.97   33.60 
 -12   3  -1  285.67   32.90 
 -12  -3   1  247.08   40.00 
 -12   3  -1  321.87   32.60 
 -12   3  -1  301.77   32.20 
  12  -3  -1  312.07   32.50 
 -12  -3   1  290.77   32.30 
 -12   3  -1  316.97   33.00 
 -12   3  -1  380.16   46.40 
 -12  -3   1  322.07   34.90 
 -12   3  -1  304.17   35.10 
  12   3   1  313.97   35.90 
 -12  -3   1  282.37   37.70 
  12  -3  -1  289.17   36.60 
  12  -3  -1  308.77   35.10 
 -12  -3   1  257.07   40.80 
  12  -3   2  102.59   17.00 
  12  -3   2  100.59   21.70 
  12  -3   2  108.19   22.20 
  12   3  -2  149.29   20.20 
 -12   3   2  137.59   17.10 
 -12  -3  -2  114.19   15.10 
 -12   3   2  130.59   18.20 
 -12  -3  -2  114.19   16.10 
 -12   3   2   93.59   21.90 
 -12  -3  -2  130.99   17.40 
 -12   3   2  145.09   25.30 
 -12  -3  -2  133.89   24.10 
 -12  -3  -2  104.29   18.00 
 -12  -3  -2  147.79   20.90 
 -12  -3  -2  136.19   19.80 
 -12  -3  -2  101.79   16.30 
 -12  -3   2   49.30   29.10 
 -12  -3   2  102.19   20.70 
 -12   3  -2  107.59   16.30 
 -12   3  -2  128.19   16.60 
 -12  -3   2  119.99   22.60 
  12  -3  -2   94.89   19.30 
 -12  -3   2   83.39   17.40 
 -12  -3   2  123.69   17.40 
  12  -3  -2  136.09   19.90 
 -12  -3   2  114.99   19.40 
 -12   3  -2  145.39   27.10 
 -12   3  -2  125.59   16.50 
  12   3   2  115.39   21.30 
  12  -3  -2  109.99   16.90 
 -12  -3   2   92.39   22.10 
 -12   3  -2  130.79   20.20 
  12  -3  -2   76.99   29.60 
  12   3   2  129.99   17.40 
 -12  -3  -3   98.29   17.30 
  12  -3   3   76.39   15.60 
 -12  -3  -3   83.19   14.90 
 -12  -3  -3  100.89   13.60 
  12  -3   3   79.79   16.60 
 -12  -3  -3   95.89   15.30 
 -12   3   3   78.29   14.80 
 -12  -3  -3  131.99   19.80 
 -12  -3  -3   88.79   23.60 
 -12   3   3  108.19   23.40 
  12  -3   3   89.59   21.20 
 -12  -3  -3   61.29   13.40 
  12  -3  -3   94.99   15.40 
 -12   3  -3   85.99   14.30 
  12   3   3   74.89   15.20 
 -12   3  -3   79.09   14.70 
 -12  -3   3  110.09   16.70 
 -12  -3   3   65.89   18.00 
 -12  -3   3   75.79   19.10 
  12   3   3   58.09   16.60 
 -12   3  -3   67.49   18.90 
 -12  -3   3  120.99   21.90 
 -12  -3   3   91.99   15.40 
 -12   3  -3   68.99   14.00 
  12  -3  -3   72.99   19.60 
  12  -3  -3  107.99   20.20 
 -12  -3  -4   36.40   15.90 
 -12  -3  -4   25.00    9.80 
 -12  -3  -4   38.60   12.30 
 -12  -3  -4   61.89   22.60 
  12  -3   4   48.70   14.40 
 -12   3   4   52.49   22.30 
 -12  -3  -4   35.80   11.20 
 -12  -3  -4   16.50   11.80 
  12  -3   4   33.30   20.80 
 -12   3   4  -31.50   16.20 
 -12   3   4   45.40   13.40 
  12  -3   4   54.99   15.30 
 -12  -3   4   16.40   13.10 
 -12  -3   4   15.10   16.50 
  12  -3  -4   15.40   15.50 
 -12   3  -4   37.50   17.10 
 -12  -3   4   18.70   16.60 
 -12   3  -4   18.50   10.60 
  12  -3  -4   41.30   13.10 
 -12  -3   4   62.49   21.70 
 -12   3  -4   33.70   11.80 
 -12   3  -4   48.40   13.00 
  12   3   4   46.80   13.90 
  12   3   4   41.80   15.60 
 -12  -3   4    4.00   14.40 
 -12  -3  -5   62.09   13.40 
 -12   3   5   36.10   18.10 
  12   3  -5   45.40   14.20 
  12  -3   5   87.39   16.60 
 -12  -3  -5   67.29   13.70 
 -12  -3  -5  136.39   20.30 
 -12  -3  -5   74.79   15.20 
 -12   3   5   68.09   15.70 
  12  -3   5   94.09   18.70 
 -12  -3  -5   71.89   15.00 
  12  -3   5   93.69   24.50 
 -12   3  -5  116.39   20.70 
  12   3   5   80.19   16.90 
  12  -3  -5   82.59   19.40 
 -12  -3   5   63.09   16.20 
 -12  -3   5   97.19   22.80 
  12  -3  -5   74.59   16.00 
  12   3   5  118.19   20.20 
  12   3   5  133.59   27.10 
 -12   3  -5   94.39   15.10 
  12  -3  -5   90.69   17.60 
 -12   3  -5   82.89   14.60 
 -12   3  -5   75.59   14.80 
 -12  -3   5   98.29   19.00 
 -12  -3   5   73.59   20.30 
 -12  -3   5   60.89   18.00 
  12  -3   6   13.60   13.20 
 -12  -3  -6   -6.50    8.40 
  12   3  -6    5.90    9.20 
 -12   3   6   22.30   14.30 
  12  -3   6  -13.40   13.70 
  12   3  -6   18.60   14.90 
 -12   3   6    1.50   14.60 
  12  -3   6  -18.00   17.20 
 -12   3   6    6.10   11.40 
 -12  -3  -6   14.60   14.60 
 -12  -3  -6    4.50   11.00 
 -12  -3  -6   -5.60    9.70 
 -12   3  -6   11.60    9.90 
  12   3   6   11.90   20.90 
 -12  -3   6   -4.70   14.20 
  12  -3  -6   12.90   12.20 
 -12   3  -6    0.50   11.00 
  12   3   6   38.80   13.20 
  12  -3  -6   18.80   12.10 
 -12  -3   6    1.40   21.60 
 -12   3  -6   19.90   11.20 
 -12   3  -6   22.70   15.40 
 -12  -3   6   -3.40   14.90 
  12  -3  -6   24.60   14.90 
  12   3   6   -6.50   14.50 
  12  -3   7    0.90   14.00 
 -12   3   7    3.00    8.00 
  12   3  -7    1.50   11.70 
  12  -3   7   13.00   11.40 
 -12  -3  -7   -2.20    8.20 
 -12  -3  -7    5.40    7.80 
 -12   3   7  -16.10   12.10 
  12   3  -7    0.50    7.50 
  12  -3   7   31.00   12.90 
 -12  -3  -7    5.70    9.00 
 -12   3   7    9.80   12.50 
  12   3   7  -11.00   11.30 
 -12   3  -7   -3.80    8.90 
 -12   3  -7   22.20    9.50 
  12   3   7    8.70   16.10 
  12   3   7    1.20   12.30 
 -12  -3   7    0.30   12.90 
 -12   3  -7    3.70    8.10 
 -12  -3   7    6.70   12.80 
  12  -3  -7   18.10   10.00 
  12  -3  -7   14.40   12.50 
  12  -3  -7    1.30   12.00 
 -12  -3  -8    9.60    7.10 
 -12  -3  -8    7.30    6.10 
 -12   3   8    1.40    6.00 
  12  -3   8    8.50    9.50 
 -12  -3  -8   -3.90    5.80 
  12   3  -8    8.60    5.50 
  12   3  -8   16.10   10.90 
  12   3  -8    2.10    9.70 
  12  -3   8    5.30    9.10 
 -12   3   8   12.90    9.50 
  12  -3  -8    0.20    7.40 
 -12   3  -8   12.60    7.10 
 -12  -3   8   14.60    9.90 
  12  -3  -8   10.10    8.00 
 -12  -3   8   16.90   11.60 
  12   3   8    2.20    8.20 
 -12   3  -8   14.30    6.40 
  12  -3  -8   -8.10    8.10 
  12   3   8   24.30    9.40 
 -13  -3   0    5.20   11.90 
 -13   3   0   -6.50   10.00 
 -13   3   0   10.40   10.50 
  13   3   0    0.10   18.20 
 -13  -3   0  -10.40   12.90 
 -13  -3   0   12.90   12.40 
 -13  -3   0   40.30   20.90 
 -13   3   0   -2.90   11.90 
 -13  -3   0   -4.90    7.70 
  13  -3   0    3.80   11.00 
 -13   3   0   -6.00   11.40 
 -13  -3   0   13.70   16.10 
  13  -3   0    7.60   15.10 
 -13   3   0    6.30   10.70 
  13  -3   0   42.40   16.20 
 -13  -3  -1  156.58   21.30 
 -13  -3  -1  167.58   23.00 
 -13   3   1  170.98   23.40 
 -13   3   1  207.98   29.80 
 -13   3   1  187.28   23.30 
 -13   3   1  178.78   23.30 
 -13  -3  -1  166.48   27.00 
 -13  -3  -1  167.08   24.20 
  13  -3   1  164.38   22.60 
 -13   3   1  174.68   24.60 
 -13  -3  -1  276.67   36.80 
 -13  -3  -1  219.28   24.80 
  13  -3   1  187.68   27.60 
 -13  -3   1  213.58   26.70 
 -13   3  -1  200.88   23.40 
 -13  -3   1  193.98   30.30 
 -13  -3   1  190.98   22.80 
 -13  -3   1  171.48   24.90 
  13  -3  -1  164.88   22.40 
  13   3   1  197.28   23.00 
 -13  -3   1  197.48   24.70 
 -13   3  -1  177.58   23.00 
 -13  -3   1  215.78   27.70 
  13  -3  -1  195.58   26.10 
 -13   3  -1  176.78   23.30 
 -13   3  -1  183.88   22.90 
 -13   3  -1  191.88   24.40 
 -13   3   2   93.69   17.50 
  13  -3   2  168.58   25.10 
  13  -3   2  108.39   17.90 
 -13  -3  -2  121.39   18.30 
 -13  -3  -2  144.19   18.90 
 -13  -3  -2  156.58   23.30 
 -13   3   2   89.69   18.80 
 -13  -3  -2  133.59   21.00 
 -13   3   2  142.39   24.70 
 -13  -3  -2  154.98   28.00 
 -13  -3  -2  108.39   16.10 
 -13  -3  -2  122.49   19.90 
 -13   3  -2  123.79   18.70 
 -13  -3   2  109.89   20.80 
  13  -3  -2   97.19   20.20 
 -13  -3   2  104.39   20.90 
 -13  -3   2  153.08   25.90 
 -13   3  -2  137.99   18.20 
 -13  -3   2  102.79   18.80 
 -13  -3   2   45.70   28.20 
  13   3   2  130.09   18.50 
 -13   3  -2  168.58   19.00 
 -13   3  -2  128.99   21.60 
  13  -3  -2  122.59   17.50 
 -13  -3   2  107.59   17.40 
  13  -3   3  411.46   46.40 
  13  -3   3  392.56   40.40 
 -13  -3  -3  408.46   51.49 
 -13   3   3  339.37   46.20 
  13  -3   3  337.47   41.00 
 -13  -3  -3  363.16   39.90 
 -13   3   3  417.06   40.90 
 -13  -3  -3  386.26   40.80 
 -13  -3  -3  365.46   40.30 
 -13  -3  -3  354.46   38.50 
 -13  -3  -3  392.96   43.70 
 -13  -3   3  377.56   40.60 
 -13  -3   3  427.46   47.10 
 -13  -3   3  360.76   43.30 
  13  -3  -3  294.07   42.80 
 -13   3  -3  376.96   43.20 
 -13  -3   3  375.06   43.10 
  13  -3  -3  376.06   40.10 
  13  -3  -3  410.26   43.70 
 -13   3  -3  386.16   39.90 
 -13   3  -3  374.36   40.80 
 -13   3  -3  354.06   40.10 
  13   3   3  341.07   40.60 
  13   3   3  331.37   40.90 
 -13  -3  -4  115.69   16.20 
 -13  -3  -4   82.29   26.90 
 -13   3   4  115.99   21.80 
  13   3  -4   69.79   19.50 
  13  -3   4   96.69   18.50 
 -13   3   4   94.29   17.30 
 -13  -3  -4  163.58   21.90 
 -13  -3  -4  108.89   15.00 
  13  -3   4   83.79   17.50 
  13  -3   4   99.09   23.10 
 -13   3   4   97.09   25.80 
 -13  -3  -4  141.29   18.90 
  13  -3   4  142.19   26.10 
 -13  -3  -4  104.19   17.10 
 -13   3  -4   92.49   17.10 
 -13   3  -4  147.79   21.90 
  13   3   4  120.99   18.40 
  13  -3  -4   69.99   19.10 
  13   3   4  195.48   28.50 
 -13   3  -4  104.59   16.80 
 -13  -3   4  100.09   17.70 
  13  -3  -4  122.89   18.00 
 -13  -3   4   69.59   20.00 
 -13   3  -4   93.19   16.10 
 -13  -3   4  121.89   21.80 
 -13  -3   4   95.59   24.20 
  13   3   4   92.69   19.50 
 -13  -3   4  126.89   19.20 
  13  -3   5  143.19   25.70 
 -13  -3  -5   87.69   14.70 
 -13   3   5   94.09   15.90 
 -13  -3  -5   24.90   29.50 
  13  -3   5  127.69   17.80 
  13   3  -5   83.09   15.00 
 -13  -3  -5   97.99   19.40 
 -13  -3  -5   71.39   13.30 
 -13   3   5   85.69   20.10 
 -13  -3  -5   82.89   15.40 
 -13  -3  -5  108.19   16.70 
  13  -3   5   70.69   17.00 
  13   3   5   98.19   24.60 
 -13   3  -5  114.69   16.70 
 -13  -3   5   83.29   22.70 
 -13  -3   5   98.09   18.80 
  13   3   5  112.89   17.30 
  13  -3  -5   98.39   19.60 
 -13  -3   5   89.39   20.60 
  13  -3  -5   64.49   16.00 
 -13   3  -5   85.29   14.90 
 -13   3  -5   91.89   15.70 
 -13  -3   5   71.69   19.30 
  13   3   5  106.09   19.20 
 -13   3  -5   90.39   18.50 
  13  -3  -5   86.79   18.30 
 -13  -3  -6   40.60   10.60 
  13  -3   6   68.69   15.10 
 -13   3   6   51.39   12.70 
  13   3  -6   25.50   14.30 
  13   3  -6   25.70    9.60 
  13  -3   6   59.69   18.70 
 -13  -3  -6   45.30   12.40 
 -13   3   6   49.70   15.20 
  13  -3   6   48.90   13.60 
 -13  -3  -6   31.70    9.30 
 -13   3   6   51.99   15.50 
  13  -3  -6   31.80   12.20 
  13   3   6   45.20   19.90 
 -13   3  -6   52.19   11.90 
  13   3   6   61.89   13.40 
 -13   3  -6   45.30   10.90 
 -13  -3   6   45.30   14.90 
  13  -3  -6   38.60   12.10 
  13  -3  -6   43.60   14.80 
 -13  -3   6   32.20   15.50 
 -13   3  -6   52.29   12.70 
  13   3   6   59.69   15.30 
 -13   3   7   33.90    7.40 
  13  -3   7   41.90   10.50 
 -13  -3  -7   25.90    8.30 
 -13   3   7   39.40   11.70 
 -13  -3  -7   21.20    7.80 
 -13   3   7   31.70   12.70 
  13   3  -7   33.70   11.00 
 -13  -3  -7   37.10    9.80 
 -13  -3  -7   24.00    7.50 
  13  -3   7   44.90   13.60 
  13   3  -7   26.90    7.40 
  13  -3   7   33.90   11.60 
 -13  -3   7   26.20   12.50 
 -13  -3   7   31.90   12.50 
 -13   3  -7   23.60    9.30 
  13   3   7   34.10   10.90 
  13  -3  -7   29.30   11.30 
  13   3   7    8.20   14.40 
  13  -3  -7   33.70    9.60 
  13  -3  -7   22.80   11.00 
 -13   3  -7   26.50    8.40 
  13   3   7   22.60   11.40 
 -13   3  -7   34.80    9.10 
  13  -3   8   10.60    9.00 
  13   3  -8   11.90    8.70 
 -13   3   8    9.90    9.00 
 -13  -3  -8    2.20    5.00 
  13   3   8   25.70   10.00 
 -13   3  -8   10.70    9.30 
 -13  -3   8   13.90    9.80 
 -13   3  -8    0.20    6.80 
  13  -3  -8    3.80    7.20 
  13   3   8    3.90    8.10 
 -14   3   0  143.79   20.30 
 -14   3   0   99.59   18.30 
 -14  -3   0  160.78   29.00 
 -14   3   0   83.59   17.00 
 -14  -3   0   96.79   19.30 
  14  -3   0  114.99   17.50 
 -14   3   0  130.79   17.80 
  14  -3   0  137.39   23.10 
  14   3   0  109.49   17.30 
 -14  -3   0  106.19   23.50 
 -14  -3   0  104.89   19.10 
  14  -3   0  128.69   22.00 
  14  -3   1  122.99   23.20 
 -14  -3  -1  153.68   19.70 
 -14  -3  -1  131.69   21.00 
 -14   3   1   95.59   18.20 
 -14   3   1   89.89   25.60 
 -14   3   1  105.09   18.90 
  14  -3   1  102.89   22.20 
  14  -3   1  111.59   17.70 
 -14  -3  -1  169.38   29.80 
 -14  -3  -1  116.99   15.70 
 -14   3   1  113.89   18.30 
 -14  -3  -1  135.09   19.90 
 -14  -3  -1  103.59   23.40 
 -14   3  -1  104.49   17.60 
 -14  -3   1  150.18   20.70 
 -14  -3   1  112.59   17.90 
 -14   3  -1  107.19   17.60 
 -14   3  -1  111.09   18.10 
  14   3   1  108.39   24.00 
 -14   3  -1  113.49   19.80 
 -14  -3   1   94.89   19.80 
 -14  -3   1  128.59   20.90 
  14  -3  -1  138.99   17.90 
 -14  -3   1  110.49   28.40 
 -14  -3   1  136.39   25.30 
  14  -3  -1   85.39   20.50 
  14   3   1  121.39   17.60 
 -14   3  -1  105.29   18.00 
 -14   3   2   50.69   13.60 
  14  -3   2  105.49   21.60 
 -14  -3  -2   33.80   10.50 
  14   3  -2   -4.40   16.60 
 -14  -3  -2   50.39   15.50 
  14  -3   2   55.99   14.30 
  14  -3   2   88.29   21.80 
 -14  -3  -2   11.60   14.70 
 -14   3   2   30.10   14.40 
 -14  -3  -2  101.39   25.70 
 -14   3   2   67.09   22.00 
 -14  -3  -2   50.09   14.40 
  14   3   2   65.19   14.00 
 -14   3  -2   47.00   14.60 
  14  -3  -2   57.19   16.80 
  14   3   2   56.99   21.90 
 -14  -3   2   50.69   16.50 
  14  -3  -2   40.60   13.10 
 -14  -3   2   68.09   14.10 
 -14   3  -2   45.80   13.20 
 -14  -3   2   48.70   21.50 
 -14  -3   2   33.60   16.50 
 -14   3  -2   15.40   12.10 
 -14  -3  -3  415.16   43.60 
 -14  -3  -3  432.96   43.10 
 -14  -3  -3  472.15   55.29 
 -14   3   3  375.06   48.90 
  14  -3   3  428.46   47.10 
  14  -3   3  433.06   48.80 
 -14  -3  -3  406.26   44.40 
  14  -3   3  421.96   43.00 
 -14  -3  -3  332.37   40.90 
 -14   3   3  437.66   43.50 
 -14  -3  -3  395.46   44.60 
 -14  -3   3  387.06   43.10 
 -14  -3   3  445.96   49.60 
 -14   3  -3  432.46   43.90 
  14   3   3  354.56   43.10 
 -14  -3   3  385.26   45.60 
  14  -3  -3  392.86   46.50 
  14   3   3  427.56   49.60 
 -14  -3   3  376.96   46.00 
 -14   3  -3  341.07   42.00 
  14  -3  -3  355.66   44.00 
 -14   3  -3  411.66   45.00 
  14  -3  -3  416.66   43.10 
 -14   3  -3  400.66   43.00 
  14  -3   4  105.29   17.70 
  14  -3   4  117.69   23.20 
  14   3  -4   59.79   17.70 
 -14  -3  -4   70.29   17.40 
  14  -3   4   86.09   16.40 
 -14   3   4   81.29   20.80 
 -14   3   4  109.29   17.50 
 -14  -3  -4   72.89   13.80 
 -14  -3  -4  116.19   16.90 
  14  -3   4  120.99   25.90 
 -14  -3  -4  110.89   19.80 
 -14  -3  -4  160.68   29.80 
 -14  -3  -4   91.69   16.80 
  14   3   4   56.49   16.10 
 -14   3  -4   89.79   16.00 
  14   3   4  118.49   18.00 
 -14  -3   4  107.99   17.40 
 -14  -3   4  123.59   24.50 
  14   3   4  159.38   26.30 
 -14   3  -4   81.69   19.30 
  14  -3  -4   93.99   16.50 
 -14  -3   4  104.29   17.50 
 -14   3  -4  128.49   18.00 
  14  -3  -4   99.59   20.30 
 -14  -3   4  109.49   20.40 
 -14  -3   4  120.99   21.30 
 -14   3  -4   91.19   16.20 
  14  -3   5    9.80   11.40 
 -14  -3  -5  -15.00   10.70 
 -14  -3  -5   13.90   13.30 
  14  -3   5   52.09   20.00 
 -14   3   5   -4.10   14.40 
 -14   3   5  -11.80   12.40 
 -14  -3  -5  -21.80   11.00 
 -14   3   5    7.40   11.80 
  14  -3   5   10.50   12.60 
 -14  -3  -5    7.40    8.20 
 -14  -3  -5   -3.50   10.90 
  14   3  -5    2.60   14.80 
 -14  -3   5   18.90   19.20 
  14  -3  -5  -23.30   14.10 
 -14   3  -5   -8.10   11.40 
  14   3   5   13.50   12.60 
  14  -3  -5   20.50   11.50 
 -14  -3   5  -10.80   13.70 
 -14   3  -5   -9.80   10.70 
 -14   3  -5    7.00   13.50 
 -14  -3   5   20.20   15.70 
 -14   3  -5  -13.10    9.20 
  14   3   5    7.90   11.60 
  14   3   5   32.60   21.00 
  14  -3  -5    9.60   13.30 
 -14  -3   5  -12.70   11.40 
 -14   3   6   96.59   17.40 
 -14   3   6  112.89   16.20 
 -14   3   6   55.79   11.50 
 -14  -3  -6   86.59   11.90 
  14  -3   6   85.89   19.00 
  14   3  -6   68.79   11.70 
  14   3  -6   73.69   15.80 
 -14  -3  -6   70.79   13.10 
  14  -3   6   93.49   14.70 
 -14  -3  -6  105.39   13.80 
  14  -3   6   98.59   15.00 
  14  -3  -6   69.89   13.20 
  14   3   6   98.39   14.80 
  14  -3  -6   70.99   13.90 
 -14   3  -6   88.89   13.80 
 -14  -3   6   86.19   14.90 
 -14   3  -6   94.39   13.20 
  14   3   6  104.99   20.40 
 -14  -3   6   62.69   15.90 
  14   3   6   74.79   14.70 
  14  -3  -6   63.39   15.20 
 -14   3  -6  104.49   13.80 
 -14  -3  -7   18.50    6.80 
 -14   3   7    6.50    9.50 
 -14   3   7   24.10   10.00 
 -14  -3  -7   13.20    7.70 
 -14  -3  -7    9.70    5.70 
  14  -3   7    8.80    7.80 
  14   3  -7   14.10    8.40 
  14  -3   7    7.90    9.10 
  14   3  -7    0.90    9.60 
  14  -3   7   24.30   11.10 
  14  -3  -7    8.40    8.70 
 -14   3  -7   10.50    6.00 
 -14  -3   7   19.00    9.80 
  14  -3  -7    9.30    7.20 
  14   3   7   15.70   11.60 
 -14   3  -7   21.80    7.40 
 -14   3  -7   -2.30    7.10 
 -14  -3   7   10.80   10.20 
  14   3   7    2.20    8.50 
  14   3   7    3.80    8.10 
  14  -3  -7    6.50    8.20 
 -15  -3   0   51.59   20.40 
 -15  -3   0   54.49   16.00 
  15   3   0   56.89   14.10 
 -15   3   0   55.89   14.00 
 -15   3   0   78.59   17.30 
  15  -3   0   48.90   14.10 
 -15  -3   0   42.70   17.00 
 -15  -3   0  137.79   29.80 
 -15   3   0   77.49   14.90 
 -15   3   0   60.19   16.30 
  15  -3   0  123.89   20.80 
 -15   3   1   79.09   16.50 
 -15   3   1   52.69   16.20 
 -15  -3  -1  124.59   29.70 
 -15  -3  -1   34.80   15.90 
 -15  -3  -1   69.29   16.00 
 -15  -3  -1   45.60   13.60 
 -15  -3  -1   33.90   16.20 
 -15   3   1   74.99   23.00 
 -15   3   1   31.30   13.60 
  15  -3   1   62.19   18.40 
 -15  -3  -1   72.49   21.60 
  15  -3   1  116.79   22.60 
  15  -3   1   38.20   14.00 
 -15   3  -1   39.10   16.40 
 -15  -3   1   79.69   17.10 
 -15   3  -1   40.60   13.10 
 -15  -3   1   36.60   16.70 
  15   3   1   50.99   13.60 
 -15   3  -1   61.89   14.40 
 -15  -3   1   72.39   22.50 
 -15   3  -1   54.39   14.50 
 -15  -3   1   62.79   14.00 
 -15  -3   1   57.99   17.00 
  15  -3  -1   55.79   14.00 
 -15   3  -1   46.30   14.10 
  15  -3  -1   66.09   19.30 
 -15  -3   1   86.99   29.20 
  15   3   1   37.60   19.00 
 -15  -3  -2   56.69   27.30 
 -15   3   2   27.40   14.20 
 -15   3   2   14.20   21.40 
 -15  -3  -2   10.20   13.30 
 -15  -3  -2   -1.90   14.00 
 -15   3   2   25.50   13.20 
  15  -3   2   24.20   18.50 
  15  -3   2   -5.70   12.40 
  15  -3   2   80.49   20.50 
 -15  -3  -2    6.10    8.30 
  15   3  -2   -1.50   15.60 
 -15  -3  -2   -9.30   13.70 
 -15  -3   2   36.50   20.60 
 -15  -3   2   21.50   15.30 
  15   3   2   -3.70   11.50 
  15   3   2    5.30   18.60 
 -15  -3   2   32.30   13.30 
  15  -3  -2    9.20   14.80 
 -15  -3   2    4.50   15.30 
 -15   3  -2    6.30   14.40 
  15  -3  -2   -8.70   11.30 
 -15   3  -2   10.00   12.60 
 -15   3  -2    9.00   11.10 
 -15   3  -2   -9.80   12.70 
  15  -3  -2   51.69   18.90 
 -15  -3  -3  -15.50   14.00 
 -15   3   3   13.90   12.40 
  15  -3   3   12.10   18.00 
 -15   3   3  -25.60   16.40 
 -15  -3  -3    3.00    8.30 
 -15  -3  -3   38.80   18.80 
  15  -3   3   -5.10   12.30 
 -15   3   3    1.50   20.20 
  15  -3   3   25.60   18.30 
 -15  -3  -3   52.29   27.10 
 -15  -3  -3   -4.40   13.40 
 -15  -3  -3   31.40   13.00 
  15  -3  -3   21.10   16.40 
 -15  -3   3   -4.30   16.00 
 -15   3  -3    7.30   11.80 
 -15   3  -3   37.80   13.70 
 -15  -3   3   26.50   12.90 
  15   3   3   20.30   12.80 
 -15   3  -3    2.80   10.30 
  15   3   3   43.80   20.30 
 -15  -3   3   39.80   21.40 
 -15  -3   3  -13.30   15.40 
  15  -3  -3   16.70   11.60 
 -15   3  -3   41.60   15.70 
  15  -3   4   12.60   15.70 
 -15  -3  -4   17.10   11.30 
  15  -3   4   10.20   17.30 
 -15  -3  -4    2.90   15.10 
  15  -3   4    2.10   12.60 
 -15   3   4   24.90   11.20 
  15  -3   4   10.10   10.20 
 -15   3   4    9.90   11.30 
 -15  -3  -4  -13.30   12.20 
 -15  -3  -4   11.40   12.50 
  15   3  -4   -8.50   13.00 
 -15   3   4  -17.60   14.50 
 -15  -3  -4   35.40   24.30 
 -15  -3  -4    4.50    8.00 
 -15  -3   4   26.20   19.20 
 -15  -3   4   23.60   15.30 
 -15  -3   4    2.60   12.00 
  15  -3  -4   12.20   13.80 
 -15   3  -4   27.30   15.30 
  15  -3  -4    5.20   10.90 
 -15   3  -4   -2.80   10.60 
 -15   3  -4    8.70    9.90 
  15   3   4   -0.20   11.90 
 -15  -3   4   -9.40   14.70 
  15   3   4   14.10   10.60 
 -15   3  -4   16.50   12.30 
  15   3   4   35.80   19.20 
  15  -3   5   69.09   13.70 
  15  -3   5  110.59   15.10 
 -15   3   5   52.69   13.90 
 -15  -3  -5   92.19   14.80 
 -15  -3  -5   90.19   14.90 
 -15   3   5  100.09   15.20 
 -15   3   5   94.59   17.90 
 -15  -3  -5   67.49   11.70 
  15  -3   5   80.69   19.00 
  15   3   5  112.49   22.00 
  15  -3  -5   59.99   15.60 
  15  -3  -5   77.59   14.10 
  15   3   5   73.69   14.00 
  15  -3  -5   72.39   15.20 
 -15   3  -5   74.09   13.70 
 -15   3  -5   80.99   13.50 
 -15  -3   5   83.69   14.40 
 -15   3  -5  104.59   14.80 
 -15  -3   5   89.19   18.80 
  15   3   5   89.09   14.80 
 -15  -3   5   93.69   17.90 
 -15  -3  -6   16.40    6.30 
  15  -3   6   15.60    8.60 
  15  -3   6   47.60   10.10 
 -15   3   6   16.30   11.20 
 -15  -3  -6    5.00    7.30 
 -15  -3  -6    5.10    8.50 
  15   3  -6   22.40   10.60 
 -15   3   6   20.00   10.50 
  15  -3   6   13.70   13.00 
  15  -3  -6   13.00    8.00 
 -15  -3   6   -3.10   10.50 
  15  -3  -6   17.80    9.30 
 -15   3  -6   -0.30    6.80 
  15  -3  -6   19.10    8.30 
  15   3   6   14.10    9.20 
 -15   3  -6   14.30    8.40 
 -15   3  -6   15.30    8.20 
  15  -3  -6   41.80   11.10 
  15   3   6   30.90    9.80 
 -15  -3   6   20.80    9.20 
  15   3   6   32.70   14.20 
 -16  -3   0   51.19   20.20 
 -16  -3   0   22.20   14.40 
  16  -3   0   73.89   19.60 
 -16   3   0   10.50   12.70 
 -16  -3   0   86.19   29.40 
 -16   3   0   34.80   14.80 
  16   3   0   35.60   12.10 
 -16   3   0   16.90   14.00 
  16  -3   0   47.90   12.70 
 -16  -3   0   37.60   15.50 
 -16   3   1   45.50   23.70 
  16   3  -1   86.49   18.10 
  16  -3   1   92.49   21.50 
 -16  -3  -1   98.69   21.40 
  16  -3   1   48.60   17.80 
  16  -3   1   99.09   15.90 
 -16  -3  -1   46.20   16.50 
 -16  -3  -1   71.29   17.20 
 -16  -3  -1  172.88   32.30 
  16   3  -1   61.69   18.70 
 -16   3   1  117.19   17.90 
 -16   3   1   99.59   16.20 
 -16   3   1   68.89   16.30 
  16  -3  -1   85.09   19.70 
  16  -3  -1  114.19   20.70 
 -16  -3   1   84.29   18.50 
  16   3   1  100.89   15.20 
 -16   3  -1   96.29   15.80 
 -16  -3   1   49.40   17.20 
 -16   3  -1   81.19   15.10 
 -16   3  -1  101.19   17.10 
  16   3   1   51.79   18.80 
 -16  -3   1   93.49   15.30 
 -16  -3   1   98.79   23.60 
 -16   3  -1   85.49   17.10 
 -16  -3   1   88.69   18.60 
  16  -3  -1   94.39   15.70 
 -16  -3  -2  369.36   43.90 
 -16   3   2  255.97   31.90 
  16  -3   2  254.47   27.70 
 -16   3   2  246.08   31.00 
  16   3  -2  197.18   34.30 
  16  -3   2  268.77   31.20 
  16  -3   2  179.18   28.50 
 -16  -3  -2  242.48   27.70 
 -16  -3  -2  221.28   26.80 
 -16  -3  -2  181.28   27.00 
 -16   3   2  236.98   27.10 
 -16  -3   2  231.18   30.40 
 -16  -3   2  182.38   28.10 
 -16   3  -2  226.88   27.60 
  16  -3  -2  220.68   25.70 
  16  -3  -2  255.27   30.30 
 -16  -3   2  244.48   27.00 
 -16   3  -2  253.07   28.20 
  16   3   2  215.88   31.00 
 -16   3  -2  199.78   25.60 
  16  -3  -2  131.19   26.40 
 -16  -3   2  230.48   31.60 
 -16   3  -2  184.88   25.80 
  16   3   2  187.58   25.20 
 -16  -3  -3   56.39   15.10 
  16  -3   3   67.39   13.90 
 -16  -3  -3   41.60   10.30 
  16  -3   3   73.19   19.20 
 -16  -3  -3   55.89   14.00 
  16   3  -3   44.70   16.20 
 -16   3   3   62.79   14.50 
 -16  -3  -3   49.80   13.80 
  16  -3   3   49.70   18.90 
 -16   3   3   60.99   17.20 
  16  -3  -3   60.59   13.10 
 -16   3  -3   46.80   13.90 
 -16  -3   3   64.09   16.70 
 -16   3  -3   46.30   14.60 
 -16   3  -3   78.49   13.50 
 -16  -3   3   65.69   17.30 
 -16  -3   3   68.39   14.50 
  16   3   3   70.29   20.80 
  16  -3  -3   61.59   16.80 
 -16   3  -3   69.39   13.50 
 -16  -3   3   63.59   20.30 
  16   3   3   84.49   13.60 
 -16  -3  -4   27.70   12.40 
  16  -3   4   39.50   15.20 
  16  -3   4   21.70   11.80 
  16   3  -4   40.40   13.50 
 -16   3   4   24.10   13.70 
 -16  -3  -4   60.59   11.90 
 -16   3   4   36.80   11.60 
 -16  -3  -4   42.60   12.40 
  16  -3   4   39.10   17.30 
 -16  -3  -4   27.40    8.10 
 -16   3  -4   38.50   10.50 
  16  -3  -4   44.30   11.30 
  16  -3  -4   24.70   13.50 
  16   3   4   46.20   12.40 
  16   3   4   71.19   19.70 
 -16  -3   4   21.70   14.10 
 -16   3  -4   61.59   13.70 
 -16   3  -4   48.30   12.00 
 -16  -3   4   36.10   14.60 
 -16   3  -4   32.90   11.30 
  16  -3  -4   35.10   14.20 
 -16  -3   4   71.89   18.00 
 -16  -3  -5  -13.10    9.20 
 -16   3   5   17.40   10.80 
 -16  -3  -5   15.10    6.20 
  16  -3   5    6.90    7.90 
  16   3  -5   14.60   10.50 
  16  -3   5    7.60    9.50 
 -16  -3  -5   10.60    8.70 
  16  -3   5   26.90   13.60 
 -16   3   5   23.00    9.50 
 -16   3   5   30.90    8.70 
 -16   3  -5    6.90    9.10 
 -16   3  -5   20.00    9.00 
  16  -3  -5    6.90   10.10 
  16   3   5   36.10   10.20 
  16   3   5    2.20   12.00 
 -16  -3   5   16.90   11.20 
  16   3   5   39.90    9.40 
  16  -3  -5   22.90   11.30 
  16  -3  -5   20.50    8.70 
  16   3   5   30.30   14.90 
 -16   3  -5   13.30   10.00 
 -16   3  -5   25.60    8.50 
  16   3  -6    6.40    7.50 
 -16  -3  -6    8.40    7.50 
 -16   3   6   17.80    8.80 
  16  -3   6   13.30   10.20 
 -16  -3  -6   26.50   10.90 
  16  -3   6   20.80    7.80 
 -16   3  -6    8.00    6.60 
  16  -3  -6   -1.50    5.80 
  16  -3  -6   15.70    7.90 
  16   3   6   18.80    7.80 
 -16   3  -6   28.40    9.60 
 -16  -3   6    6.20    9.30 
 -16   3  -6    1.40    5.70 
  16   3   6   10.30   10.80 
 -16   3  -6    6.60    6.80 
  17   3   0    8.60   10.40 
 -17   3   0   14.50   13.30 
 -17  -3   0    1.50   13.40 
  17  -3   0   30.60   17.20 
  17  -3   0   28.20   16.80 
 -17  -3   0   -4.30   17.60
[truncated: 1,826,782 more chars]
