# Supplementary material for: Illuminating the dark conformational space of macrocycles using dominant rotors
Source: Springer Nature journal article supplement (doi:10.1038/s41557-020-00620-y), 2021-02-15
Supplement: 41557_2020_620_MOESM123_ESM.mol [file 41557_2020_620_MOESM123_ESM.mol]

nchem.20010080C-comp15.mol
  ChemDraw12032023332D

 29 30  0  0  1  0  0  0  0  0999 V2000
   -0.6565   -1.8778    0.0000 C   0  0  0  0  0  0  0  0  0  0  0  0
    0.1051   -1.5599    0.0000 N   0  0  0  0  0  0  0  0  0  0  0  0
    0.6882   -0.9763    0.0000 C   0  0  0  0  0  0  0  0  0  0  0  0
    1.0007   -0.2133    0.0000 C   0  0  0  0  0  0  0  0  0  0  0  0
    1.0007    0.6117    0.0000 N   0  0  0  0  0  0  0  0  0  0  0  0
    0.6846    1.3734    0.0000 C   0  0  0  0  0  0  0  0  0  0  0  0
    0.1014    1.9565    0.0000 C   0  0  0  0  0  0  0  0  0  0  0  0
   -0.6620    2.2708    0.0000 N   0  0  0  0  0  0  0  0  0  0  0  0
   -1.4870    2.2708    0.0000 C   0  0  0  0  0  0  0  0  0  0  0  0
   -2.2483    1.9529    0.0000 C   0  0  0  0  0  0  0  0  0  0  0  0
   -2.8318    1.3697    0.0000 N   0  0  0  0  0  0  0  0  0  0  0  0
   -3.1443    0.6063    0.0000 C   0  0  0  0  0  0  0  0  0  0  0  0
   -3.1443   -0.2187    0.0000 C   0  0  0  0  0  0  0  0  0  0  0  0
   -2.8281   -0.9800    0.0000 C   0  0  0  0  0  0  0  0  0  0  0  0
   -2.2446   -1.5635    0.0000 N   0  0  0  0  0  0  0  0  0  0  0  0
   -1.4815   -1.8778    0.0000 C   0  0  0  0  0  0  0  0  0  0  0  0
    0.5138    2.6711    0.0000 O   0  0  0  0  0  0  0  0  0  0  0  0
    1.3992    1.7857    0.0000 C   0  0  0  0  0  0  0  0  0  0  0  0
    2.1135    1.3734    0.0000 C   0  0  0  0  0  0  0  0  0  0  0  0
    2.1135    0.5484    0.0000 C   0  0  0  0  0  0  0  0  0  0  0  0
    2.8281    0.1357    0.0000 C   0  0  0  0  0  0  0  0  0  0  0  0
    3.5424    0.5484    0.0000 C   0  0  0  0  0  0  0  0  0  0  0  0
    3.5424    1.3734    0.0000 C   0  0  0  0  0  0  0  0  0  0  0  0
    2.8281    1.7857    0.0000 C   0  0  0  0  0  0  0  0  0  0  0  0
    1.8104   -0.3724    0.0000 O   0  0  0  0  0  0  0  0  0  0  0  0
   -0.4945   -2.6868    0.0000 O   0  0  0  0  0  0  0  0  0  0  0  0
   -3.5424   -1.3927    0.0000 O   0  0  0  0  0  0  0  0  0  0  0  0
   -2.6227    2.6879    0.0000 O   0  0  0  0  0  0  0  0  0  0  0  0
   -1.6418   -2.6879    0.0000 C   0  0  0  0  0  0  0  0  0  0  0  0
  1  2  1  0      
  2  3  1  0      
  3  4  1  0      
  4  5  1  0      
  5  6  1  0      
  6  7  1  0      
  8  9  1  0      
  9 10  1  0      
 10 11  1  0      
 11 12  1  0      
 12 13  1  0      
 13 14  1  0      
 14 15  1  0      
 15 16  1  0      
  7  8  1  0      
  1 16  1  0      
  7 17  2  0      
  6 18  1  6      
 18 19  1  0      
 19 20  2  0      
 20 21  1  0      
 21 22  2  0      
 22 23  1  0      
 23 24  2  0      
 24 19  1  0      
  4 25  2  0      
  1 26  2  0      
 14 27  2  0      
 10 28  2  0      
 16 29  1  6      
M  END
